# Supplementary material for: Proteomic Mapping of the Interactome of KRAS Mutants Identifies New Features of RAS Signalling Networks and the Mechanism of Action of Sotorasib
Source: Cancers (Basel). 2023 Aug 17;15(16):4141. doi: 10.3390/cancers15164141 (PMC10452836; doi:10.3390/cancers15164141)
Supplement: Supplementary file 1 [file cancers-15-04141-s001.zip]

Archive with 5 entries (5 files):
- supplementary figures.pdf
- Table S1 HEK293 KRAS interactome.xlsx
- Table S2 HKe3 KRAS interactome.xlsx
- Table S3 FUNCTIONAL CLUSTERS Figure 3B.xlsx
- Table S4 KRASG12C and KRAS WT sotorasib interactomes.xlsx
