# Supplementary material for: Proteomic Mapping of the Interactome of KRAS Mutants Identifies New Features of RAS Signalling Networks and the Mechanism of Action of Sotorasib
Source: Cancers (Basel). 2023 Aug 17;15(16):4141. doi: 10.3390/cancers15164141 (PMC10452836; doi:10.3390/cancers15164141)
Supplement: Supplementary file 1 [file cancers-15-04141-s001.zip › Table S1 HEK293 KRAS interactome.xlsx]

## Sheet: DESCRIPTION
		LFQ Intensities tab shows all the proteins identified in the experiment	Immunoprecipitation FLAG Trap
		HEK293 cell line transfected with:	Experiment label
		pCEFL-FLAG	EV
		pCEFL-FLAG-KRAS WT	WT
		pCEFL-FLAG-KRASG13D	G13D
		pCEFL-FLAG-KRASG12V	G12V
Description			Cut off
KRAS specific interacting proteins cut off		ratio Average LFQ condition/Average LFQ EV	>2
Tabs: specific KRAS WT; specific KRASG13D; specific KRASG12V		T.TEST LFQ condition vs LFQ EV	p-value <0.01
KRAS specific interacting proteins cut off		ratio Average LFQ condition 1/Average LFQ condition 2	>2 or <0.5
Tabs: DIF KRAS WT VS KRASG13D; DIF KRAS WT VS KRASG12V; DIF KRASG13D VS KRASG12V		T.TEST LFQ condition 1 VS LFQ condition 2	p-value <0.05

## Sheet: LFQ INTENSITIES
Protein IDs	Protein names	Gene names	Fasta headers	LFQ intensity EV 1	LFQ intensity EV 1_1	LFQ intensity EV 2	LFQ intensity EV 2_1	LFQ intensity EV 3	LFQ intensity EV 3_1	LFQ intensity WT 1	LFQ intensity WT 1_1	LFQ intensity WT 2	LFQ intensity WT 2_1	LFQ intensity WT 3	LFQ intensity WT 3_1	LFQ intensity G13D 1	LFQ intensity G13D 1_1	LFQ intensity G13D 2	LFQ intensity G13D 2_1	LFQ intensity G13D 3	LFQ intensity G13D 3_1	LFQ intensity G12V 1	LFQ intensity G12V 1_1	LFQ intensity G12V 2	LFQ intensity G12V 2_1	LFQ intensity G12V 3	LFQ intensity G12V 3_1
A1A528;O43264;F5H3C1	Centromere/kinetochore protein zw10 homolog	ZW10	>tr|A1A528|A1A528_HUMAN Centromere/kinetochore protein zw10 homolog OS=Homo sapiens GN=ZW10 PE=2 SV=1;>sp|O43264|ZW10_HUMAN Centromere/kinetochore protein zw10 homolog OS=Homo sapiens GN=ZW10 PE=1 SV=3	1	1	1	1	1510900	1	16678000	15119000	7902200	5919800	10520000	9740400	22426000	41427000	52162000	62290000	30668000	50662000	26637000	12519000	36641000	10296000	11128000	14765000
A1Z1Q3-2;A1Z1Q3;A1Z1Q3-5;A1Z1Q3-4	O-acetyl-ADP-ribose deacetylase MACROD2	MACROD2	>sp|A1Z1Q3-2|MACD2_HUMAN Isoform 2 of O-acetyl-ADP-ribose deacetylase MACROD2 OS=Homo sapiens GN=MACROD2;>sp|A1Z1Q3|MACD2_HUMAN O-acetyl-ADP-ribose deacetylase MACROD2 OS=Homo sapiens GN=MACROD2 PE=1 SV=1	1393400000	373300000	3931000000	803880000	294460000	120650000	98694000	84969000	19517000	22751000	86092000	34084000	5244800	1208500	537950	1239900	386670	1	21128000	17621000	15152000	10141000	3012600	1785800
A2A2D0;P16949;P16949-2;B7Z2Z7;Q9H169;G5EA16;Q9H169-2;E5RIR6;E7EVN3	Stathmin	STMN1	>tr|A2A2D0|A2A2D0_HUMAN Stathmin (Fragment) OS=Homo sapiens GN=STMN1 PE=2 SV=2;>sp|P16949|STMN1_HUMAN Stathmin OS=Homo sapiens GN=STMN1 PE=1 SV=3;>sp|P16949-2|STMN1_HUMAN Isoform 2 of Stathmin OS=Homo sapiens GN=STMN1	1	12654000	55004000	28626000	10761000	23388000	11998000	5093700	18511000	1724000	20136000	23277000	18843000	9492200	3690600	20608000	24984000	28313000	18454000	7440300	4204700	3753900	910520	20177000
A2A2R6;Q5JWD1;H0Y7E8;Q5JWE9;H0Y7F4;P11488;P63096;P19087;P09471-2;P09471;P08754;A8MTJ3;P04899;P04899-4;P63092-3;P63092-2;P38405;P63092;P63092-4;P38405-2;Q5JWF2-2;Q5JWF2	Guanine nucleotide-binding protein G(t) subunit alpha-1;Guanine nucleotide-binding protein G(i) subunit alpha-1;Guanine nucleotide-binding protein G(t) subunit alpha-2;Guanine nucleotide-binding protein G(o) subunit alpha;Guanine nucleotide-binding protein G(k) subunit alpha;Guanine nucleotide-binding protein G(t) subunit alpha-3;Guanine nucleotide-binding protein G(i) subunit alpha-2;Guanine nuc…	GNAS;GNAT1;GNAI1;GNAT2;GNAO1;GNAI3;GNAT3;GNAI2;GNAL	>tr|A2A2R6|A2A2R6_HUMAN Guanine nucleotide-binding protein G(s) subunit alpha isoforms short (Fragment) OS=Homo sapiens GN=GNAS PE=2 SV=1;>tr|Q5JWD1|Q5JWD1_HUMAN Guanine nucleotide-binding protein G(s) subunit alpha isoforms short OS=Homo sapiens GN=GNAS P	1	1	1	1	6402800	10492000	1	10186000	8710700	9130900	6000900	6656500	10790000	1	15481000	17256000	9796800	1	10784000	1	11314000	11407000	10134000	10466000
A5YKK6-3;A5YKK6-2;A5YKK6;H3BMZ2;B5MDN3;A5YKK6-4;H3BR89;H3BMH0	CCR4-NOT transcription complex subunit 1	CNOT1	>sp|A5YKK6-3|CNOT1_HUMAN Isoform 3 of CCR4-NOT transcription complex subunit 1 OS=Homo sapiens GN=CNOT1;>sp|A5YKK6-2|CNOT1_HUMAN Isoform 2 of CCR4-NOT transcription complex subunit 1 OS=Homo sapiens GN=CNOT1;>sp|A5YKK6|CNOT1_HUMAN CCR4-NOT transcription co	1	13574000	1	18921000	13794000	12097000	17429000	9968800	9399900	12303000	12230000	12373000	11430000	6059600	7754400	5730500	6526000	1	7744500	6331700	5971600	8104800	6883800	11983000
A6NHL2-2;A6NHL2	Tubulin alpha chain-like 3	TUBAL3	>sp|A6NHL2-2|TBAL3_HUMAN Isoform 2 of Tubulin alpha chain-like 3 OS=Homo sapiens GN=TUBAL3;>sp|A6NHL2|TBAL3_HUMAN Tubulin alpha chain-like 3 OS=Homo sapiens GN=TUBAL3 PE=1 SV=2	1262900	1	1	1	2161000	1543900	5177800	5444000	4732900	3650900	6698200	8076900	18609000	10955000	17527000	13052000	13173000	18502000	7742500	6088800	21842000	12975000	12710000	16028000
A6NKT7;J3KNE0;P49792;J3KQ37;P0DJD0;J3QTV4;P0DJD1;F8VYC4;Q7Z3J3;Q99666;O14715;J3KNY6	RanBP2-like and GRIP domain-containing protein 3;E3 SUMO-protein ligase RanBP2;Putative peptidyl-prolyl cis-trans isomerase;RANBP2-like and GRIP domain-containing protein 1;RANBP2-like and GRIP domain-containing protein 2;RanBP2-like and GRIP domain-containing protein 4;RANBP2-like and GRIP domain-containing protein 5/6;RANBP2-like and GRIP domain-containing protein 8	RGPD3;RANBP2;RGPD8;RGPD1;RGPD2;RGPD4;RGPD5	>sp|A6NKT7|RGPD3_HUMAN RanBP2-like and GRIP domain-containing protein 3 OS=Homo sapiens GN=RGPD3 PE=2 SV=2;>tr|J3KNE0|J3KNE0_HUMAN RanBP2-like and GRIP domain-containing protein 3 OS=Homo sapiens GN=RGPD3 PE=4 SV=1;>sp|P49792|RBP2_HUMAN E3 SUMO-protein lig	1	1	1	1	1	1	1	1	1	1	1	1	5281800	1	1348600	1336000	1	1	1	1	1286300	1	1	1
A6NLH6;Q9P003	Protein cornichon homolog 4	CNIH4	>tr|A6NLH6|A6NLH6_HUMAN Protein cornichon homolog 4 OS=Homo sapiens GN=CNIH4 PE=2 SV=1;>sp|Q9P003|CNIH4_HUMAN Protein cornichon homolog 4 OS=Homo sapiens GN=CNIH4 PE=1 SV=1	1	1	1	1	1	1	18207000	1	10496000	1	23774000	17193000	65158000	75846000	51407000	53789000	47589000	43173000	40779000	29469000	44371000	49701000	33829000	38529000
A8K7Q2;E9PS65;E9PM13		HSPA8	>tr|A8K7Q2|A8K7Q2_HUMAN Heat shock cognate 71 kDa protein OS=Homo sapiens GN=HSPA8 PE=2 SV=1;>tr|E9PS65|E9PS65_HUMAN Heat shock cognate 71 kDa protein (Fragment) OS=Homo sapiens GN=HSPA8 PE=2 SV=1	1	1	7236300	7058400	1	11241000	1	1	1	1	9187900	10293000	9772900	3789900	1	1	1	1	12192000	1	1	1	1	1
A8MUB1;P68366;C9JEV8;C9JQ00;C9JJQ8;C9JDL2	Tubulin alpha-4A chain	TUBA4A	>tr|A8MUB1|A8MUB1_HUMAN Tubulin alpha-4A chain OS=Homo sapiens GN=TUBA4A PE=2 SV=1;>sp|P68366|TBA4A_HUMAN Tubulin alpha-4A chain OS=Homo sapiens GN=TUBA4A PE=1 SV=1	1	1	1	1	1	1	4852400	1	4084600	3137300	1	3199500	4130000	1	4492900	1	2534500	3390200	3537100	4738300	1	8016300	1	1
B0FLL2;O60825;O60825-2;B4DY91;B4DI16	6-phosphofructo-2-kinase/fructose-2,6-bisphosphatase 2;6-phosphofructo-2-kinase;Fructose-2,6-bisphosphatase	PFKFB2	>tr|B0FLL2|B0FLL2_HUMAN 6-phosphofructo-2-kinase/fructose-2, 6-bisphosphatase 2 transcript variant 3 OS=Homo sapiens GN=PFKFB2 PE=2 SV=1;>sp|O60825|F262_HUMAN 6-phosphofructo-2-kinase/fructose-2,6-bisphosphatase 2 OS=Homo sapiens GN=PFKFB2 PE=1 SV=2;>sp|O6	700490000	740640000	39334000	36171000	819040000	1011300000	321320000	308080000	282380000	164190000	261350000	179380000	53504000	66009000	20034000	13251000	37256000	36129000	108250000	83224000	23372000	102710000	54333000	86809000
B1AHA8;P09601	Heme oxygenase 1	HMOX1	>tr|B1AHA8|B1AHA8_HUMAN Heme oxygenase 1 (Fragment) OS=Homo sapiens GN=HMOX1 PE=2 SV=1;>sp|P09601|HMOX1_HUMAN Heme oxygenase 1 OS=Homo sapiens GN=HMOX1 PE=1 SV=1	8719600	1	1	10811000	1	1	16454000	1	1	1	1	1	14310000	11720000	15964000	22425000	13020000	17673000	15056000	11080000	10505000	8864600	6521500	7650900
B1AHF3;P00387-2;P00387;P00387-3	NADH-cytochrome b5 reductase 3;NADH-cytochrome b5 reductase 3 membrane-bound form;NADH-cytochrome b5 reductase 3 soluble form	CYB5R3	>tr|B1AHF3|B1AHF3_HUMAN NADH-cytochrome b5 reductase 3 membrane-bound form (Fragment) OS=Homo sapiens GN=CYB5R3 PE=2 SV=1;>sp|P00387-2|NB5R3_HUMAN Isoform 2 of NADH-cytochrome b5 reductase 3 OS=Homo sapiens GN=CYB5R3;>sp|P00387|NB5R3_HUMAN NADH-cytochrome	1	1	6505100	6067300	3732500	1	1	1	1	6210800	9413300	7904200	1	1	1	1	5221400	6578800	1	6218200	1	3328400	1	5274100
B1AJQ6;Q86Y82	Syntaxin-12	STX12	>tr|B1AJQ6|B1AJQ6_HUMAN Syntaxin-12 (Fragment) OS=Homo sapiens GN=STX12 PE=2 SV=2;>sp|Q86Y82|STX12_HUMAN Syntaxin-12 OS=Homo sapiens GN=STX12 PE=1 SV=1	2824300	2883300	1	1	3332800	2980500	6526900	4606000	7122000	6277200	7704800	7537500	9454700	9671700	11771000	1	7687700	6712600	6660400	7524200	31433000	26420000	7290800	8523300
B1AJY5;B1AJY7;O75832;B1AJY6;O75832-2	26S proteasome non-ATPase regulatory subunit 10	PSMD10	>tr|B1AJY5|B1AJY5_HUMAN 26S proteasome non-ATPase regulatory subunit 10 OS=Homo sapiens GN=PSMD10 PE=2 SV=1;>tr|B1AJY7|B1AJY7_HUMAN 26S proteasome non-ATPase regulatory subunit 10 OS=Homo sapiens GN=PSMD10 PE=2 SV=1;>sp|O75832|PSD10_HUMAN 26S proteasome no	15309000	9502400	4658800	1	10410000	9527100	7049300	6268300	10873000	10641000	5734600	7132700	8124900	5996600	4822700	1	6287400	6138600	5926500	6719800	3745200	4582600	4656500	5997600
B1AK87;P47756-2;B1AK88;P47756;F6USW4;B1AK85;F6Q0E3	F-actin-capping protein subunit beta	CAPZB	>tr|B1AK87|B1AK87_HUMAN Capping protein (Actin filament) muscle Z-line, beta, isoform CRA_a OS=Homo sapiens GN=CAPZB PE=4 SV=1;>sp|P47756-2|CAPZB_HUMAN Isoform 2 of F-actin-capping protein subunit beta OS=Homo sapiens GN=CAPZB;>tr|B1AK88|B1AK88_HUMAN Cappi	70643000	90933000	3811900	39289000	62547000	76301000	60245000	45448000	60886000	63749000	49479000	38932000	29508000	30026000	15642000	15342000	37125000	35269000	54382000	40269000	16006000	8119100	26274000	24904000
B1AN99;P35030-5;P35030-3;P35030-2;P35030-4;P35030	Trypsin-3	PRSS3	>tr|B1AN99|B1AN99_HUMAN Trypsin-3 (Fragment) OS=Homo sapiens GN=PRSS3 PE=2 SV=2;>sp|P35030-5|TRY3_HUMAN Isoform 5 of Trypsin-3 OS=Homo sapiens GN=PRSS3;>sp|P35030-3|TRY3_HUMAN Isoform 3 of Trypsin-3 OS=Homo sapiens GN=PRSS3;>sp|P35030-2|TRY3_HUMAN Isoform	83091000	96808000	341290000	364280000	92578000	83086000	43441000	46438000	83180000	80748000	29988000	34439000	16005000	22390000	23888000	31068000	18191000	19528000	29900000	30312000	19404000	19568000	37477000	1
B1APM4;P35610;P35610-3;P35610-2	Sterol O-acyltransferase 1	SOAT1	>tr|B1APM4|B1APM4_HUMAN Sterol O-acyltransferase 1 (Fragment) OS=Homo sapiens GN=SOAT1 PE=2 SV=1;>sp|P35610|SOAT1_HUMAN Sterol O-acyltransferase 1 OS=Homo sapiens GN=SOAT1 PE=1 SV=3;>sp|P35610-3|SOAT1_HUMAN Isoform 3 of Sterol O-acyltransferase 1 OS=Homo s	2316800	3423300	1	1	3570200	3434600	19632000	10492000	8328700	5807400	7335100	7986500	23537000	14299000	1	1	26714000	23049000	8982900	8993300	1	1	10997000	12200000
B3KP49;B4DID0;B4DQH9;Q6VN20;R4GMX8	Ran-binding protein 10	RANBP10	>tr|B3KP49|B3KP49_HUMAN RAN binding protein 10, isoform CRA_b OS=Homo sapiens GN=RANBP10 PE=2 SV=1;>tr|B4DID0|B4DID0_HUMAN Ran-binding protein 10 OS=Homo sapiens GN=RANBP10 PE=2 SV=1;>tr|B4DQH9|B4DQH9_HUMAN Ran-binding protein 10 OS=Homo sapiens GN=RANBP10	12047000	12529000	1	1	9795900	12066000	11088000	9045700	8142800	6558100	5371500	3872000	3534900	16632000	1	1	3480100	2257000	4921100	4811000	1	1	2254500	1
B3KQ25;K7ESG5;P61289;P61289-2;K7EMD0;K7EPX6;K7EKR3;K7ENH2	Proteasome activator complex subunit 3	PSME3	>tr|B3KQ25|B3KQ25_HUMAN Proteasome activator complex subunit 3 OS=Homo sapiens GN=PSME3 PE=2 SV=1;>tr|K7ESG5|K7ESG5_HUMAN Proteasome activator complex subunit 3 OS=Homo sapiens GN=PSME3 PE=2 SV=1;>sp|P61289|PSME3_HUMAN Proteasome activator complex subunit	15662000	14212000	33898000	36265000	13770000	15261000	21113000	25232000	22445000	36582000	38377000	35028000	25892000	33507000	41223000	59999000	47362000	61093000	29809000	21065000	33461000	26479000	24380000	36926000
B3KRS5;Q92769;J3KPW7;E5RFI6;E5RJ04;E5RGV4;E5RHE7;E5RH52;E5RG37;E5RFP9;H3BM24;E5RK19;E7ESJ6;O15379;O15379-2	Histone deacetylase;Histone deacetylase 2	HDAC2	>tr|B3KRS5|B3KRS5_HUMAN Histone deacetylase OS=Homo sapiens GN=HDAC2 PE=2 SV=1;>sp|Q92769|HDAC2_HUMAN Histone deacetylase 2 OS=Homo sapiens GN=HDAC2 PE=1 SV=2;>tr|J3KPW7|J3KPW7_HUMAN Histone deacetylase 2 OS=Homo sapiens GN=HDAC2 PE=2 SV=1	16607000	20573000	6246600	9768700	30816000	28583000	24737000	22353000	24708000	31824000	23197000	13584000	8725500	16456000	7806000	6548700	16921000	12534000	27969000	25390000	9299800	4601100	13217000	12610000
B3KTI1;P19961;P04746;P04745;CON__Q3MHH8	Alpha-amylase 2B;Pancreatic alpha-amylase;Alpha-amylase 1	AMY2B;AMY2A;AMY1A	>tr|B3KTI1|B3KTI1_HUMAN Alpha-amylase 2B OS=Homo sapiens GN=AMY2B PE=2 SV=1;>sp|P19961|AMY2B_HUMAN Alpha-amylase 2B OS=Homo sapiens GN=AMY2B PE=1 SV=1;>sp|P04746|AMYP_HUMAN Pancreatic alpha-amylase OS=Homo sapiens GN=AMY2A PE=1 SV=2;>sp|P04745|AMY1_HUMAN A	61004000	52977000	187770000	210500000	51519000	47883000	32119000	25686000	37426000	36051000	18328000	33926000	8079300	9377800	9468700	9742800	4572400	8414800	33959000	22169000	10602000	10413000	18466000	17986000
B4DDC6;B4DP11;Q15185;B4DP21	Prostaglandin E synthase 3	PTGES3	>tr|B4DDC6|B4DDC6_HUMAN Prostaglandin E synthase 3 OS=Homo sapiens GN=PTGES3 PE=2 SV=1;>tr|B4DP11|B4DP11_HUMAN Prostaglandin E synthase 3 OS=Homo sapiens GN=PTGES3 PE=2 SV=1;>sp|Q15185|TEBP_HUMAN Prostaglandin E synthase 3 OS=Homo sapiens GN=PTGES3 PE=1 SV	1	6330500	4561700	5496900	7031000	1	7663900	2853100	6254000	7109500	1	4810400	6966500	4664300	1	1	1	14141000	2623900	1	1	1	4485100	1
B4DFA2;I3L0N3;P46459	Vesicle-fusing ATPase	NSF	>tr|B4DFA2|B4DFA2_HUMAN Vesicle-fusing ATPase OS=Homo sapiens GN=NSF PE=2 SV=1;>tr|I3L0N3|I3L0N3_HUMAN Vesicle-fusing ATPase OS=Homo sapiens GN=NSF PE=2 SV=1;>sp|P46459|NSF_HUMAN Vesicle-fusing ATPase OS=Homo sapiens GN=NSF PE=1 SV=3	6211300	7338100	23313000	8336200	5751000	7548600	7302400	8687700	9467600	8204100	8966200	10704000	6948700	9425800	1	1	1	1	7436100	6803800	1	1	5918700	1
B4DJ81;P28331-3;P28331-4;P28331-5;P28331;P28331-2	NADH-ubiquinone oxidoreductase 75 kDa subunit, mitochondrial	NDUFS1	>tr|B4DJ81|B4DJ81_HUMAN NADH-ubiquinone oxidoreductase 75 kDa subunit, mitochondrial OS=Homo sapiens GN=NDUFS1 PE=2 SV=1;>sp|P28331-3|NDUS1_HUMAN Isoform 3 of NADH-ubiquinone oxidoreductase 75 kDa subunit, mitochondrial OS=Homo sapiens GN=NDUFS1;>sp|P28331	1	7286800	1	12348000	9372800	9209000	9381300	8639500	9091000	9595700	11168000	16598000	13702000	20485000	12213000	1	11635000	13330000	10071000	11851000	1	1	8126200	7633000
B4DJ85;Q92990;Q92990-2;M0QXG8	Glomulin	GLMN	>tr|B4DJ85|B4DJ85_HUMAN Glomulin OS=Homo sapiens GN=GLMN PE=2 SV=1;>sp|Q92990|GLMN_HUMAN Glomulin OS=Homo sapiens GN=GLMN PE=1 SV=2;>sp|Q92990-2|GLMN_HUMAN Isoform 2 of Glomulin OS=Homo sapiens GN=GLMN	1	1	1	1	1	1	1	1	1	1	1	1	7239700	1	1	1	1	1	1	7403700	1	1	1	1
B4DJP7;P62318;H3BT13	Small nuclear ribonucleoprotein Sm D3	SNRPD3	>tr|B4DJP7|B4DJP7_HUMAN Small nuclear ribonucleoprotein Sm D3 OS=Homo sapiens GN=SNRPD3 PE=2 SV=1;>sp|P62318|SMD3_HUMAN Small nuclear ribonucleoprotein Sm D3 OS=Homo sapiens GN=SNRPD3 PE=1 SV=1;>tr|H3BT13|H3BT13_HUMAN Small nuclear ribonucleoprotein Sm D3	3070500000	3680000000	224370000	224620000	3289200000	3525400000	1515000000	1509900000	1270000000	1681600000	1372300000	2093900000	757770000	602280000	537640000	376340000	505840000	878730000	635190000	559910000	482720000	516070000	678550000	649270000
B4DJV2;O75390;H0YIC4;F8W642;F8VZK9;F8VX07;F8VRP1;F8VX68;F8VPF9;F8VPA1;F8VTT8;F8W1S4;F8W4S1;H0YH82	Citrate synthase;Citrate synthase, mitochondrial	CS	>tr|B4DJV2|B4DJV2_HUMAN Citrate synthase OS=Homo sapiens GN=CS PE=2 SV=1;>sp|O75390|CISY_HUMAN Citrate synthase, mitochondrial OS=Homo sapiens GN=CS PE=1 SV=2;>tr|H0YIC4|H0YIC4_HUMAN Citrate synthase (Fragment) OS=Homo sapiens GN=CS PE=2 SV=1	12461000	9261200	30168000	46606000	13643000	17153000	12110000	10996000	42345000	42253000	30933000	26248000	1	9286900	30432000	10198000	20790000	31931000	7678900	6838700	4395900	9923100	11443000	11670000
B4DL14;P36542-2;P36542	ATP synthase subunit gamma;ATP synthase subunit gamma, mitochondrial	ATP5C1	>tr|B4DL14|B4DL14_HUMAN ATP synthase subunit gamma OS=Homo sapiens GN=ATP5C1 PE=2 SV=1;>sp|P36542-2|ATPG_HUMAN Isoform Heart of ATP synthase subunit gamma, mitochondrial OS=Homo sapiens GN=ATP5C1;>sp|P36542|ATPG_HUMAN ATP synthase subunit gamma, mitochondr	109740000	91200000	69391000	82613000	131270000	145700000	212760000	293030000	143080000	178950000	173300000	158540000	221440000	257280000	269410000	321640000	208900000	250560000	190670000	213050000	194090000	217120000	201680000	205480000
B4DLN1;P52815		SLC25A10	>tr|B4DLN1|B4DLN1_HUMAN Mitochondrial dicarboxylate carrier OS=Homo sapiens GN=SLC25A10 PE=2 SV=1	44359000	40984000	80907000	79959000	56388000	54763000	58212000	58485000	52772000	59061000	40089000	50851000	92581000	57431000	85893000	110160000	78882000	49757000	52543000	55315000	73512000	61754000	66395000	78084000
B4DPR4;C9J494;Q9H000	Probable E3 ubiquitin-protein ligase makorin-2	MKRN2	>tr|B4DPR4|B4DPR4_HUMAN Makorin, ring finger protein, 2, isoform CRA_b OS=Homo sapiens GN=MKRN2 PE=2 SV=1;>tr|C9J494|C9J494_HUMAN Probable E3 ubiquitin-protein ligase makorin-2 OS=Homo sapiens GN=MKRN2 PE=2 SV=1;>sp|Q9H000|MKRN2_HUMAN Probable E3 ubiquitin	15243000	15195000	1	1	22172000	17239000	10612000	11044000	27115000	27042000	9367100	5026200	1	2986600	1	1	3427000	1	13677000	7374900	1	1	3699400	3162800
B4DS61;Q96SB4;H3BLV9;Q96SB4-3;Q5R363;P78362;P78362-2;D6RBM8;H7C521;H7C5L6;Q9UPE1-2;A8MPP7;Q9UPE1-3;A8MPY5;Q9UPE1-4;Q9UPE1;E7ETV6;H7C2I2;D6RBF8;C9J2M4;C9JWF7	SRSF protein kinase 1	SRPK1	>tr|B4DS61|B4DS61_HUMAN SFRS protein kinase 1, isoform CRA_f OS=Homo sapiens GN=SRPK1 PE=2 SV=1;>sp|Q96SB4|SRPK1_HUMAN SRSF protein kinase 1 OS=Homo sapiens GN=SRPK1 PE=1 SV=2;>tr|H3BLV9|H3BLV9_HUMAN SRSF protein kinase 1 (Fragment) OS=Homo sapiens GN=SRPK	49211000	59819000	33744000	32251000	62597000	75222000	81549000	71926000	53717000	55766000	62450000	48475000	55305000	48307000	62329000	47532000	62115000	38706000	66067000	68839000	114750000	102440000	74677000	59945000
B4DSH5;O94991	SLIT and NTRK-like protein 5	SLITRK5	>tr|B4DSH5|B4DSH5_HUMAN SLIT and NTRK-like protein 5 OS=Homo sapiens GN=SLITRK5 PE=2 SV=1;>sp|O94991|SLIK5_HUMAN SLIT and NTRK-like protein 5 OS=Homo sapiens GN=SLITRK5 PE=2 SV=2	1	1	1	1	7978300	6906700	1	7382800	3964400	6411200	1	1	6328200	4941100	1	1	4922000	4827400	4485700	9814400	2273300	1	5841800	7193200
B4DST5;Q9H3S7	Tyrosine-protein phosphatase non-receptor type 23	PTPN23	>tr|B4DST5|B4DST5_HUMAN Tyrosine-protein phosphatase non-receptor type 23 OS=Homo sapiens GN=PTPN23 PE=2 SV=1;>sp|Q9H3S7|PTN23_HUMAN Tyrosine-protein phosphatase non-receptor type 23 OS=Homo sapiens GN=PTPN23 PE=1 SV=1	1	1	1	1890700	1	2743800	1	6972900	4801900	4888700	1	1	1	13648000	1	1	1	5614300	5429300	4339100	4024000	3820400	1	1
B4DTE2;Q9HCE6-4;Q5VXI4;Q9HCE6-5;Q9HCE6-3;Q9HCE6-2;Q9HCE6	Rho guanine nucleotide exchange factor 10-like protein	ARHGEF10L	>tr|B4DTE2|B4DTE2_HUMAN Rho guanine nucleotide exchange factor 10-like protein OS=Homo sapiens GN=ARHGEF10L PE=2 SV=1;>sp|Q9HCE6-4|ARGAL_HUMAN Isoform 4 of Rho guanine nucleotide exchange factor 10-like protein OS=Homo sapiens GN=ARHGEF10L;>tr|Q5VXI4|Q5VXI	1	1	1	1	1	1	9570100	9841300	1	1	1	11923000	1	32321000	25734000	1	26782000	24372000	1	1	1	1	1	1
B4DTG6;Q8ND56-2;Q8ND56;K7EMZ9	Protein LSM14 homolog A	LSM14A	>tr|B4DTG6|B4DTG6_HUMAN Protein LSM14 homolog A OS=Homo sapiens GN=LSM14A PE=2 SV=1;>sp|Q8ND56-2|LS14A_HUMAN Isoform 2 of Protein LSM14 homolog A OS=Homo sapiens GN=LSM14A;>sp|Q8ND56|LS14A_HUMAN Protein LSM14 homolog A OS=Homo sapiens GN=LSM14A PE=1 SV=3;>	79987000	20210000	10245000	9901400	53616000	47142000	14640000	27362000	22971000	21420000	11171000	10881000	10308000	7822800	7151900	5465000	8657300	10760000	18697000	24761000	4101600	8209200	21134000	11898000
B4DVY1;O15371;B0QYA5;B0QYA6;B0QYA7;B0QYA4;B0QYA8	Eukaryotic translation initiation factor 3 subunit D	EIF3D	>tr|B4DVY1|B4DVY1_HUMAN Eukaryotic translation initiation factor 3 subunit D OS=Homo sapiens GN=EIF3D PE=2 SV=1;>sp|O15371|EIF3D_HUMAN Eukaryotic translation initiation factor 3 subunit D OS=Homo sapiens GN=EIF3D PE=1 SV=1;>tr|B0QYA5|B0QYA5_HUMAN Eukaryoti	351500000	381880000	255620000	653060000	370960000	369390000	284610000	240380000	275050000	266630000	231700000	188730000	143410000	138990000	115900000	113290000	107910000	145120000	178960000	156170000	159860000	170120000	148740000	157740000
B4DWJ2;P47897;H7C0R3;C9JSG9;B7Z840;C9J165;F2Z2V6	Glutamine--tRNA ligase	QARS	>tr|B4DWJ2|B4DWJ2_HUMAN Uncharacterized protein OS=Homo sapiens GN=QARS PE=2 SV=1;>sp|P47897|SYQ_HUMAN Glutamine--tRNA ligase OS=Homo sapiens GN=QARS PE=1 SV=1	21956000	28650000	29153000	33987000	28491000	27910000	76254000	78667000	86749000	69073000	75796000	59493000	70454000	90474000	59510000	50771000	81449000	63668000	42996000	38614000	54450000	64694000	53945000	59919000
B4DXW1;P61158;F5H3P5;Q9P1U1-2;Q9P1U1	Actin-related protein 3	ACTR3	>tr|B4DXW1|B4DXW1_HUMAN Actin-related protein 3 OS=Homo sapiens GN=ACTR3 PE=2 SV=1;>sp|P61158|ARP3_HUMAN Actin-related protein 3 OS=Homo sapiens GN=ACTR3 PE=1 SV=3;>tr|F5H3P5|F5H3P5_HUMAN Actin-related protein 3 OS=Homo sapiens GN=ACTR3 PE=2 SV=1	56785000	63249000	9232700	5657700	56622000	63747000	5958100	13705000	30774000	10141000	21951000	8283300	9570100	3544400	3389100	6265200	6707700	6686100	11639000	6096200	2884800	8399700	4841200	4885800
B4DY13;B7Z7A3;Q9BZE4	Nucleolar GTP-binding protein 1	GTPBP4	>tr|B4DY13|B4DY13_HUMAN Nucleolar GTP-binding protein 1 OS=Homo sapiens GN=GTPBP4 PE=2 SV=1;>tr|B7Z7A3|B7Z7A3_HUMAN Nucleolar GTP-binding protein 1 OS=Homo sapiens GN=GTPBP4 PE=2 SV=1;>sp|Q9BZE4|NOG1_HUMAN Nucleolar GTP-binding protein 1 OS=Homo sapiens GN	17481000	14344000	12953000	1	17750000	13445000	19880000	19087000	12667000	11799000	13899000	10484000	26978000	11286000	1	17704000	13020000	9706200	22592000	13813000	1	1	11638000	10188000
B4DZG7;B4DWW1;P40616;F8VYN9	ADP-ribosylation factor-like protein 1	ARL1	>tr|B4DZG7|B4DZG7_HUMAN ADP-ribosylation factor-like protein 1 OS=Homo sapiens GN=ARL1 PE=2 SV=1;>tr|B4DWW1|B4DWW1_HUMAN ADP-ribosylation factor-like protein 1 OS=Homo sapiens GN=ARL1 PE=2 SV=1;>sp|P40616|ARL1_HUMAN ADP-ribosylation factor-like protein 1 O	1	1	1	1	385490000	413370000	658070000	896400000	723810000	499430000	1062000000	686210000	25660000	1927800000	1	1	528320000	787410000	1	576390000	646960000	1	1088000000	665130000
B4DZI8;P35606;D6RBZ7;D6RCL6;D6RBG7;D6RBT6;H0YAC7;D6R997;H0Y938	Coatomer subunit beta	COPB2	>tr|B4DZI8|B4DZI8_HUMAN Coatomer protein complex, subunit beta 2 (Beta prime), isoform CRA_b OS=Homo sapiens GN=COPB2 PE=2 SV=1;>sp|P35606|COPB2_HUMAN Coatomer subunit beta OS=Homo sapiens GN=COPB2 PE=1 SV=2	11931000	8652100	28049000	28158000	24084000	16874000	10436000	16292000	13692000	47202000	12575000	15925000	56203000	18904000	15461000	15946000	21125000	20388000	12836000	59132000	14876000	21987000	14691000	10667000
B4E022;P29401;P29401-2;E9PFF2	Transketolase	TKT	>tr|B4E022|B4E022_HUMAN Transketolase OS=Homo sapiens GN=TKT PE=2 SV=1;>sp|P29401|TKT_HUMAN Transketolase OS=Homo sapiens GN=TKT PE=1 SV=3;>sp|P29401-2|TKT_HUMAN Isoform 2 of Transketolase OS=Homo sapiens GN=TKT	24361000	20820000	110050000	95578000	28988000	40296000	22577000	24758000	59884000	54596000	49904000	38754000	36477000	24884000	3031500	9970300	46967000	46530000	17713000	12924000	1805500	5658400	13324000	13096000
B4E0G4;Q8IWS0-3;Q8IWS0;Q5JRC6;Q8IWS0-4;Q8IWS0-2	PHD finger protein 6	PHF6	>tr|B4E0G4|B4E0G4_HUMAN PHD finger protein 6 OS=Homo sapiens GN=PHF6 PE=2 SV=1;>sp|Q8IWS0-3|PHF6_HUMAN Isoform 3 of PHD finger protein 6 OS=Homo sapiens GN=PHF6;>sp|Q8IWS0|PHF6_HUMAN PHD finger protein 6 OS=Homo sapiens GN=PHF6 PE=1 SV=1;>tr|Q5JRC6|Q5JRC6_	72878000	59436000	5798500	5701900	43701000	48175000	65598000	57164000	52117000	37318000	31748000	33307000	37610000	26678000	13984000	9372300	23761000	23232000	33286000	24555000	14721000	15992000	20541000	17068000
B4E241;P84103	Serine/arginine-rich splicing factor 3	SFRS3;SRSF3	>tr|B4E241|B4E241_HUMAN Serine/arginine-rich-splicing factor 3 OS=Homo sapiens GN=SRSF3 PE=2 SV=1;>sp|P84103|SRSF3_HUMAN Serine/arginine-rich splicing factor 3 OS=Homo sapiens GN=SRSF3 PE=1 SV=1	358850000	306850000	174290000	212460000	284390000	270520000	219640000	236180000	193200000	217760000	201840000	206950000	174540000	157080000	196700000	172470000	162200000	154680000	212920000	224810000	204450000	217540000	197550000	204160000
B4E2V5;P27105;P27105-2	Erythrocyte band 7 integral membrane protein	STOM	>tr|B4E2V5|B4E2V5_HUMAN Erythrocyte band 7 integral membrane protein OS=Homo sapiens GN=STOM PE=2 SV=1;>sp|P27105|STOM_HUMAN Erythrocyte band 7 integral membrane protein OS=Homo sapiens GN=STOM PE=1 SV=3	861660	1394200	2726600	1	1841300	702410	277100000	251660000	202900000	194880000	161450000	182960000	190870000	164880000	120390000	145310000	121720000	139080000	85229000	154130000	252620000	220000000	283100000	243080000
B4E318;Q9P287-4;Q9P287-3;Q9P287;Q9P287-2	BRCA2 and CDKN1A-interacting protein	BCCIP	>tr|B4E318|B4E318_HUMAN BRCA2 and CDKN1A-interacting protein OS=Homo sapiens GN=BCCIP PE=2 SV=1;>sp|Q9P287-4|BCCIP_HUMAN Isoform 4 of BRCA2 and CDKN1A-interacting protein OS=Homo sapiens GN=BCCIP;>sp|Q9P287-3|BCCIP_HUMAN Isoform 3 of BRCA2 and CDKN1A-inter	3652400	1	1	1	1	4033400	5242300	1	3337800	6470600	1	1	6413000	1	6923200	5668700	9831900	7856700	1	1	5452200	5676800	1	1
B4E363;Q9Y285;K7ER16;K7EPH2;K7ER00;K7ERS0;K7EK06	Phenylalanine--tRNA ligase alpha subunit	FARSA	>tr|B4E363|B4E363_HUMAN Phenylalanine--tRNA ligase alpha subunit OS=Homo sapiens GN=FARSA PE=2 SV=1;>sp|Q9Y285|SYFA_HUMAN Phenylalanine--tRNA ligase alpha subunit OS=Homo sapiens GN=FARSA PE=1 SV=3;>tr|K7ER16|K7ER16_HUMAN Phenylalanine--tRNA ligase alpha s	5862800	9064300	6362300	1	15277000	4595800	9421100	11823000	7949000	8630300	9449500	7927500	8811500	9295300	8816700	11326000	19150000	23080000	8317500	8155000	11010000	13984000	7644400	10147000
B5MC59;P35244	Replication protein A 14 kDa subunit	RPA3	>tr|B5MC59|B5MC59_HUMAN Replication protein A 14 kDa subunit OS=Homo sapiens GN=RPA3 PE=4 SV=1;>sp|P35244|RFA3_HUMAN Replication protein A 14 kDa subunit OS=Homo sapiens GN=RPA3 PE=1 SV=1	1	1	14277000	1	8174800	1	1	1	42866000	49168000	18648000	35559000	1	8506000	1	5529700	15169000	6100200	41972000	39706000	5690500	1	17349000	8999500
B5MCF9;O00541-2;O00541;B3KXD6;H7C267	Pescadillo homolog	PES1	>tr|B5MCF9|B5MCF9_HUMAN Pescadillo homolog OS=Homo sapiens GN=PES1 PE=2 SV=1;>sp|O00541-2|PESC_HUMAN Isoform 2 of Pescadillo homolog OS=Homo sapiens GN=PES1;>sp|O00541|PESC_HUMAN Pescadillo homolog OS=Homo sapiens GN=PES1 PE=1 SV=1;>tr|B3KXD6|B3KXD6_HUMAN	7197200	1	1	1	6596900	1	7444100	6576500	7893400	1	7864700	9158000	1	7551100	5813200	6007100	1	1	1	1	5584800	4592500	1	8265700
B5MCZ9;Q16769-2;Q16769;C9JS14	Glutaminyl-peptide cyclotransferase	QPCT	>tr|B5MCZ9|B5MCZ9_HUMAN Glutaminyl-peptide cyclotransferase (Fragment) OS=Homo sapiens GN=QPCT PE=2 SV=1;>sp|Q16769-2|QPCT_HUMAN Isoform 2 of Glutaminyl-peptide cyclotransferase OS=Homo sapiens GN=QPCT;>sp|Q16769|QPCT_HUMAN Glutaminyl-peptide cyclotransfer	118870000	68734000	1	1	74781000	74163000	24544000	15691000	58021000	20072000	19841000	12235000	20858000	17314000	1	1971900	21203000	13143000	11633000	3811300	2459500	2522300	3765800	9489500
B7Z1R5;P38606;C9JA17;C9JVW8	V-type proton ATPase catalytic subunit A	ATP6V1A	>tr|B7Z1R5|B7Z1R5_HUMAN V-type proton ATPase catalytic subunit A OS=Homo sapiens GN=ATP6V1A PE=2 SV=1;>sp|P38606|VATA_HUMAN V-type proton ATPase catalytic subunit A OS=Homo sapiens GN=ATP6V1A PE=1 SV=2	8081300	8506100	21694000	18773000	9643900	10996000	16367000	28127000	19048000	20684000	22293000	33335000	40510000	57193000	33378000	31846000	48574000	49968000	30687000	16085000	46177000	30582000	25971000	48790000
B7Z522;P30046;A6NHG4;B5MC82;J3KQ18	D-dopachrome decarboxylase;D-dopachrome decarboxylase-like protein	DDT;DDTL	>tr|B7Z522|B7Z522_HUMAN D-dopachrome decarboxylase OS=Homo sapiens GN=DDT PE=2 SV=1;>sp|P30046|DOPD_HUMAN D-dopachrome decarboxylase OS=Homo sapiens GN=DDT PE=1 SV=3;>sp|A6NHG4|DDTL_HUMAN D-dopachrome decarboxylase-like protein OS=Homo sapiens GN=DDTL PE=2	15000000	5817500	74244000	70805000	16195000	11814000	6067300	11492000	25204000	25489000	25875000	22041000	16026000	9673700	1	9695200	44025000	35224000	22734000	9374600	1	1	28864000	26408000
B7Z662;Q6PCB7	Long-chain fatty acid transport protein 1	SLC27A1	>tr|B7Z662|B7Z662_HUMAN Long-chain fatty acid transport protein 1 OS=Homo sapiens GN=SLC27A1 PE=2 SV=1;>sp|Q6PCB7|S27A1_HUMAN Long-chain fatty acid transport protein 1 OS=Homo sapiens GN=SLC27A1 PE=2 SV=1	1	1	1	1	1	1	11726000	1	1	1	5975400	5806600	26206000	19883000	42190000	1	20395000	1	11380000	1	32537000	1	1	1
B7Z817;Q15392;F5H0H1;H7C4B7	Delta(24)-sterol reductase	DHCR24	>tr|B7Z817|B7Z817_HUMAN Delta(24)-sterol reductase OS=Homo sapiens GN=DHCR24 PE=2 SV=1;>sp|Q15392|DHC24_HUMAN Delta(24)-sterol reductase OS=Homo sapiens GN=DHCR24 PE=1 SV=2;>tr|F5H0H1|F5H0H1_HUMAN Delta(24)-sterol reductase OS=Homo sapiens GN=DHCR24 PE=2 S	4613800	1	1	1	3296600	3280100	22922000	4959500	2826300	4346500	8458300	10461000	75126000	51650000	33823000	27051000	57476000	35394000	23741000	18447000	23892000	28578000	25611000	23865000
B7Z909;E9PJ21;E9PL22;Q9Y4L1	Hypoxia up-regulated protein 1	HYOU1	>tr|B7Z909|B7Z909_HUMAN Hypoxia up-regulated protein 1 OS=Homo sapiens GN=HYOU1 PE=2 SV=1;>tr|E9PJ21|E9PJ21_HUMAN Hypoxia up-regulated protein 1 (Fragment) OS=Homo sapiens GN=HYOU1 PE=2 SV=1;>tr|E9PL22|E9PL22_HUMAN Hypoxia up-regulated protein 1 OS=Homo sa	1	3579800	11866000	12133000	7014400	6155700	9444500	6483700	3180800	1	8874700	4048400	4635500	5910600	1	1	844530	1	1	3852100	1	1	1495200	2116700
B7Z982;D6RA26;O43660-2;O43660;A8MW61	Pleiotropic regulator 1	PLRG1	>tr|B7Z982|B7Z982_HUMAN Pleiotropic regulator 1 OS=Homo sapiens GN=PLRG1 PE=2 SV=1;>tr|D6RA26|D6RA26_HUMAN Pleiotropic regulator 1 (Fragment) OS=Homo sapiens GN=PLRG1 PE=2 SV=1;>sp|O43660-2|PLRG1_HUMAN Isoform 2 of Pleiotropic regulator 1 OS=Homo sapiens G	1	1	1	1	1	1	1	4302400	1	1	8955900	9289300	4761700	1693500	1	1	1	1	4998400	1	1	1	1	1
B7ZAB3;G3V150;O94766;E9PNA1	Galactosylgalactosylxylosylprotein 3-beta-glucuronosyltransferase 3	B3GAT3	>tr|B7ZAB3|B7ZAB3_HUMAN Galactosylgalactosylxylosylprotein 3-beta-glucuronosyltransferase 3 OS=Homo sapiens GN=B3GAT3 PE=2 SV=1;>tr|G3V150|G3V150_HUMAN Beta-1,3-glucuronyltransferase 3 (Glucuronosyltransferase I), isoform CRA_a OS=Homo sapiens GN=B3GAT3 PE	6589000	7342300	4462400	1	5398900	4883600	8744300	9633400	9065900	9817500	6913400	6807400	10318000	10367000	3854500	3826800	6788900	10030000	10431000	8172300	1	5315600	14673000	19064000
B8ZZ51;B9A041;P40925-2;P40925;P40925-3;C9JF79	Malate dehydrogenase, cytoplasmic	MDH1	>tr|B8ZZ51|B8ZZ51_HUMAN Malate dehydrogenase, cytoplasmic OS=Homo sapiens GN=MDH1 PE=2 SV=1;>tr|B9A041|B9A041_HUMAN Malate dehydrogenase, cytoplasmic OS=Homo sapiens GN=MDH1 PE=2 SV=1;>sp|P40925-2|MDHC_HUMAN Isoform 2 of Malate dehydrogenase, cytoplasmic O	26995000	8758300	130250000	136970000	25815000	34521000	32533000	24237000	64373000	56515000	30628000	33371000	17138000	21860000	24776000	9924100	56594000	44091000	12053000	12360000	3936400	6002900	24770000	24551000
B8ZZQ6;P06454-2;P06454;B8ZZA1;B8ZZW7;H7C2N1	Prothymosin alpha;Prothymosin alpha, N-terminally processed;Thymosin alpha-1	PTMA	>tr|B8ZZQ6|B8ZZQ6_HUMAN Uncharacterized protein OS=Homo sapiens GN=PTMA PE=4 SV=1;>sp|P06454-2|PTMA_HUMAN Isoform 2 of Prothymosin alpha OS=Homo sapiens GN=PTMA;>sp|P06454|PTMA_HUMAN Prothymosin alpha OS=Homo sapiens GN=PTMA PE=1 SV=2;>tr|B8ZZA1|B8ZZA1_HUM	40821000	37237000	20720000	39249000	53438000	65210000	55632000	51932000	73073000	80610000	49272000	57419000	49063000	41612000	44080000	38064000	78204000	86333000	33545000	29778000	15586000	18100000	41540000	35123000
B8ZZU8;Q15370;Q15370-2;I3L0M9	Transcription elongation factor B polypeptide 2	TCEB2	>tr|B8ZZU8|B8ZZU8_HUMAN Transcription elongation factor B (SIII), polypeptide 2 (18kDa, elongin B), isoform CRA_b OS=Homo sapiens GN=TCEB2 PE=4 SV=1;>sp|Q15370|ELOB_HUMAN Transcription elongation factor B polypeptide 2 OS=Homo sapiens GN=TCEB2 PE=1 SV=1;>s	9392500	8777500	12769000	11626000	11152000	9520900	14914000	10943000	9685100	13146000	35162000	16904000	8285900	11083000	8405700	9801300	16774000	22734000	10328000	8410400	13715000	15769000	11651000	13525000
B9A062;P13995;B4DY35;Q7Z650;B8ZZU9	Bifunctional methylenetetrahydrofolate dehydrogenase/cyclohydrolase, mitochondrial;NAD-dependent methylenetetrahydrofolate dehydrogenase;Methenyltetrahydrofolate cyclohydrolase	MTHFD2	>tr|B9A062|B9A062_HUMAN Bifunctional methylenetetrahydrofolate dehydrogenase/cyclohydrolase, mitochondrial OS=Homo sapiens GN=MTHFD2 PE=2 SV=1;>sp|P13995|MTDC_HUMAN Bifunctional methylenetetrahydrofolate dehydrogenase/cyclohydrolase, mitochondrial OS=Homo	6370500	1	1	9726900	8108500	1	1	1	5994600	6469500	6476300	7072600	6431800	1	1	1	1	1	1	1	1	1	1	1
B9A067;Q16891-2;Q16891-4;Q16891;Q16891-3;C9J406;H7C463;D6RAW4	Mitochondrial inner membrane protein	IMMT	>tr|B9A067|B9A067_HUMAN Mitochondrial inner membrane protein OS=Homo sapiens GN=IMMT PE=2 SV=2;>sp|Q16891-2|IMMT_HUMAN Isoform 2 of Mitochondrial inner membrane protein OS=Homo sapiens GN=IMMT;>sp|Q16891-4|IMMT_HUMAN Isoform 4 of Mitochondrial inner membra	143240000	137910000	9798600	156300000	91332000	105220000	263180000	248710000	146690000	154970000	185720000	183540000	394090000	356040000	435640000	392160000	354960000	376080000	223150000	238440000	326300000	349610000	264440000	287310000
C9J2C4;O75190-2;O75190-3;O75190;Q8NHS0;O75190-4;C9JB42;C9JDR7;C9JDX6;F8WCZ4;Q8WWF6;C9J2P2;E9PH18;C9JRD2;C9JXB9;P25686-2;P25686	DnaJ homolog subfamily B member 6;DnaJ homolog subfamily B member 8	DNAJB6;DNAJB8	>tr|C9J2C4|C9J2C4_HUMAN DnaJ homolog subfamily B member 6 (Fragment) OS=Homo sapiens GN=DNAJB6 PE=2 SV=1;>sp|O75190-2|DNJB6_HUMAN Isoform B of DnaJ homolog subfamily B member 6 OS=Homo sapiens GN=DNAJB6;>sp|O75190-3|DNJB6_HUMAN Isoform C of DnaJ homolog su	6546300	5238500	1	1	5875200	4412400	7405000	7415900	7041600	5345000	6307300	8167000	6697900	4301700	1	1	6340500	1	12675000	4939600	1	1	1	9482100
C9J3L8;C9J5W0;P43307;E9PAL7;C9IZQ1;P43307-2;F5H5Y2	Translocon-associated protein subunit alpha	SSR1	>tr|C9J3L8|C9J3L8_HUMAN Translocon-associated protein subunit alpha OS=Homo sapiens GN=SSR1 PE=2 SV=1;>tr|C9J5W0|C9J5W0_HUMAN Translocon-associated protein subunit alpha OS=Homo sapiens GN=SSR1 PE=2 SV=1;>sp|P43307|SSRA_HUMAN Translocon-associated protein	1	1	1	1	1	6060400	14104000	14940000	20889000	28193000	19459000	16538000	29491000	27110000	26488000	58832000	24810000	37109000	21880000	1	32843000	34779000	25053000	25369000
C9J6D1;Q99733;Q99733-2;E9PNW0;E9PJJ2;E9PS34;E9PNJ7;E9PKT8;C9JZI7;A8MXH2;E9PKI2;E9PP22;C9J1B1;H0YCI4	Nucleosome assembly protein 1-like 4	NAP1L4	>tr|C9J6D1|C9J6D1_HUMAN Nucleosome assembly protein 1-like 4 (Fragment) OS=Homo sapiens GN=NAP1L4 PE=2 SV=1;>sp|Q99733|NP1L4_HUMAN Nucleosome assembly protein 1-like 4 OS=Homo sapiens GN=NAP1L4 PE=1 SV=1;>sp|Q99733-2|NP1L4_HUMAN Isoform 2 of Nucleosome ass	25442000	8544200	16031000	22462000	29806000	26011000	40376000	47410000	39783000	40273000	29118000	31665000	37470000	37759000	16229000	39407000	34489000	40546000	39915000	38819000	32753000	28849000	48455000	44129000
C9J719;C9JJ78;Q15125	3-beta-hydroxysteroid-Delta(8),Delta(7)-isomerase	EBP	>tr|C9J719|C9J719_HUMAN 3-beta-hydroxysteroid-Delta(8),Delta(7)-isomerase (Fragment) OS=Homo sapiens GN=EBP PE=2 SV=2;>tr|C9JJ78|C9JJ78_HUMAN 3-beta-hydroxysteroid-Delta(8),Delta(7)-isomerase (Fragment) OS=Homo sapiens GN=EBP PE=2 SV=1;>sp|Q15125|EBP_HUMAN	1	1	1	1	1	4416100	9674900	10162000	7552600	10921000	13707000	12067000	22523000	19937000	14800000	21127000	31428000	1	9304500	13365000	1	1	1	1
C9J9K3;P08865;A6NE09;C9JQR9	40S ribosomal protein SA	RPSA;RPSAP58	>tr|C9J9K3|C9J9K3_HUMAN 40S ribosomal protein SA (Fragment) OS=Homo sapiens GN=RPSA PE=3 SV=2;>sp|P08865|RSSA_HUMAN 40S ribosomal protein SA OS=Homo sapiens GN=RPSA PE=1 SV=4;>tr|A6NE09|A6NE09_HUMAN 40S ribosomal protein SA OS=Homo sapiens GN=RPSAP58 PE=3	227270000	213520000	1366200000	918180000	256150000	281870000	253400000	232250000	357030000	332080000	274770000	248150000	258900000	248370000	262390000	273380000	388310000	334220000	159720000	184500000	289830000	279320000	274620000	290720000
C9JA28;Q9UNL2;B4E2P2;C9J365	Translocon-associated protein subunit gamma	SSR3	>tr|C9JA28|C9JA28_HUMAN Translocon-associated protein subunit gamma OS=Homo sapiens GN=SSR3 PE=2 SV=1;>sp|Q9UNL2|SSRG_HUMAN Translocon-associated protein subunit gamma OS=Homo sapiens GN=SSR3 PE=1 SV=1;>tr|B4E2P2|B4E2P2_HUMAN Translocon-associated protein	2507700	5796200	1	1	4164600	4674000	10829000	8824700	8525900	7004500	7392800	8085600	17223000	19015000	38012000	29795000	32965000	35655000	6066700	11186000	26709000	28556000	14445000	17090000
C9JAW5;Q9Y241;C9JNU6;A8MV81;Q9Y241-2	HIG1 domain family member 1A, mitochondrial;HIG1 domain family member 1C	HIGD1A;HIGD1C	>tr|C9JAW5|C9JAW5_HUMAN HIG1 domain family member 1A, mitochondrial OS=Homo sapiens GN=HIGD1A PE=2 SV=1;>sp|Q9Y241|HIG1A_HUMAN HIG1 domain family member 1A, mitochondrial OS=Homo sapiens GN=HIGD1A PE=1 SV=1;>tr|C9JNU6|C9JNU6_HUMAN HIG1 domain family member	16185000	1	7333700	1	1	2730200	24447000	27545000	23463000	25189000	25003000	21766000	36202000	39023000	56900000	67136000	42272000	53721000	24915000	29707000	70595000	54913000	48718000	45321000
C9JFR7;P99999;CON__P62894	Cytochrome c	CYCS	>tr|C9JFR7|C9JFR7_HUMAN Cytochrome c (Fragment) OS=Homo sapiens GN=CYCS PE=2 SV=1;>sp|P99999|CYC_HUMAN Cytochrome c OS=Homo sapiens GN=CYCS PE=1 SV=2	3456000	3724500	10759000	37228000	6731400	9276700	6087600	5490000	12920000	8707300	5581800	5412400	4307200	4578300	1	1	1	1	3716900	3398300	1990200	1	1	1
C9JL85;P58546	Myotrophin	MTPN	>tr|C9JL85|C9JL85_HUMAN Myotrophin OS=Homo sapiens GN=MTPN PE=2 SV=1;>sp|P58546|MTPN_HUMAN Myotrophin OS=Homo sapiens GN=MTPN PE=1 SV=2	1	4920600	1	10949000	5749800	6381700	6010100	1	6559100	6306000	5627700	4907900	5122500	4846400	1	1	4643400	5162800	1	1	1	1	3597700	4117200
C9JLD6;C9J9D3;C9JZ60;C9J372;C9J4Z9;C9JN77;C9JG84;C9JWC3;O94875-11		SORBS2	>tr|C9JLD6|C9JLD6_HUMAN Sorbin and SH3 domain-containing protein 2 (Fragment) OS=Homo sapiens GN=SORBS2 PE=4 SV=1;>tr|C9J9D3|C9J9D3_HUMAN Sorbin and SH3 domain-containing protein 2 (Fragment) OS=Homo sapiens GN=SORBS2 PE=2 SV=1;>tr|C9JZ60|C9JZ60_HUMAN Sorb	1	1	1	1	1	1	1	1	1	1	1	1	1	1	143810000	1	130600000	160880000	1	1	1	1	1	1
C9JNW5;P83731;C9JXB8	60S ribosomal protein L24	RPL24	>tr|C9JNW5|C9JNW5_HUMAN 60S ribosomal protein L24 OS=Homo sapiens GN=RPL24 PE=4 SV=1;>sp|P83731|RL24_HUMAN 60S ribosomal protein L24 OS=Homo sapiens GN=RPL24 PE=1 SV=1;>tr|C9JXB8|C9JXB8_HUMAN 60S ribosomal protein L24 OS=Homo sapiens GN=RPL24 PE=4 SV=1	523120000	642200000	305510000	293760000	513040000	572360000	596160000	641080000	472130000	445230000	455010000	455040000	634890000	573110000	561520000	494110000	466790000	499530000	400420000	454350000	442190000	433370000	300290000	335290000
C9JP35;C9JMN4;Q92520	Protein FAM3C	FAM3C	>tr|C9JP35|C9JP35_HUMAN Protein FAM3C (Fragment) OS=Homo sapiens GN=FAM3C PE=2 SV=1;>tr|C9JMN4|C9JMN4_HUMAN Protein FAM3C (Fragment) OS=Homo sapiens GN=FAM3C PE=2 SV=1;>sp|Q92520|FAM3C_HUMAN Protein FAM3C OS=Homo sapiens GN=FAM3C PE=1 SV=1	7286500	1	1	1	7924500	1	12246000	34356000	8575200	8773500	6879100	7323300	12948000	1	10211000	9583100	11648000	21494000	4340400	1	1	1	1	12636000
C9JRJ5;Q9UGP4	LIM domain-containing protein 1	LIMD1	>tr|C9JRJ5|C9JRJ5_HUMAN LIM domain-containing protein 1 OS=Homo sapiens GN=LIMD1 PE=2 SV=1;>sp|Q9UGP4|LIMD1_HUMAN LIM domain-containing protein 1 OS=Homo sapiens GN=LIMD1 PE=1 SV=1	7373200	5166300	1	1	4374700	4134100	3054000	3315000	4091200	4299000	5085000	4704100	3987400	3452500	2710500	1	1	3611600	1	3285000	1	1	3602300	3614800
C9JUG7;P47755-2;F8W9N7;P47755	F-actin-capping protein subunit alpha-2	CAPZA2	>tr|C9JUG7|C9JUG7_HUMAN F-actin-capping protein subunit alpha-2 OS=Homo sapiens GN=CAPZA2 PE=2 SV=1;>sp|P47755-2|CAZA2_HUMAN Isoform 2 of F-actin-capping protein subunit alpha-2 OS=Homo sapiens GN=CAPZA2;>tr|F8W9N7|F8W9N7_HUMAN F-actin-capping protein subu	5846100	6594900	8094100	7318400	7692400	7466400	4618000	1	5445400	5430200	4818500	5755100	5282300	1	1	1	1	1	5261500	1	1	1	1	1
C9JW69;P18754;P18754-2;C9JRH2;C9JMJ4;C9J3R0;C9JQZ4	Regulator of chromosome condensation	RCC1	>tr|C9JW69|C9JW69_HUMAN Regulator of chromosome condensation (Fragment) OS=Homo sapiens GN=RCC1 PE=2 SV=1;>sp|P18754|RCC1_HUMAN Regulator of chromosome condensation OS=Homo sapiens GN=RCC1 PE=1 SV=1;>sp|P18754-2|RCC1_HUMAN Isoform 2 of Regulator of chromos	14005000	1	16413000	1	1	21307000	1	18503000	16405000	20547000	8248500	11432000	6381300	1	11818000	8321400	29297000	1	5717100	1	9966700	1	5807800	1
C9JXC3;C9JNE2;Q9Y530;H7C5Q1;C9J5P1;C9JA90;C9IZY1	O-acetyl-ADP-ribose deacetylase 1	OARD1	>tr|C9JXC3|C9JXC3_HUMAN O-acetyl-ADP-ribose deacetylase 1 OS=Homo sapiens GN=OARD1 PE=2 SV=1;>tr|C9JNE2|C9JNE2_HUMAN O-acetyl-ADP-ribose deacetylase 1 (Fragment) OS=Homo sapiens GN=OARD1 PE=2 SV=1;>sp|Q9Y530|OARD1_HUMAN O-acetyl-ADP-ribose deacetylase 1 OS	393220000	212980000	1670600000	297760000	111010000	81891000	15140000	47621000	50211000	49662000	43190000	37122000	6441100	922620	1	1	1	941450	7921100	6054400	1316500	978580	1915000	1386400
C9JYQ9;Q6P5R6;H0Y8C2	60S ribosomal protein L22-like 1	RPL22L1	>tr|C9JYQ9|C9JYQ9_HUMAN 60S ribosomal protein L22-like 1 OS=Homo sapiens GN=RPL22L1 PE=2 SV=1;>sp|Q6P5R6|RL22L_HUMAN 60S ribosomal protein L22-like 1 OS=Homo sapiens GN=RPL22L1 PE=1 SV=2;>tr|H0Y8C2|H0Y8C2_HUMAN 60S ribosomal protein L22-like 1 (Fragment) O	12525000	6618900	26563000	19689000	6616900	8429700	39999000	42548000	29994000	37522000	25976000	33815000	27629000	33918000	42243000	46895000	38970000	24015000	69487000	48124000	74841000	60261000	52052000	64691000
D3DWF9;Q96QU8;H3BRV5;H3BR41;H3BMW9;H3BPG8	Exportin-6	XPO6	>tr|D3DWF9|D3DWF9_HUMAN Exportin 6, isoform CRA_a OS=Homo sapiens GN=XPO6 PE=4 SV=1;>sp|Q96QU8|XPO6_HUMAN Exportin-6 OS=Homo sapiens GN=XPO6 PE=1 SV=1	1	1	1	12758000	1	1	1	1	1	1	1	1	3057500	6703600	26619000	5911000	1	3795900	1368400	1	4354700	1	3300900	6421100
D3YTB1;P62910;F8W727;D3YTI8	60S ribosomal protein L32	RPL32	>tr|D3YTB1|D3YTB1_HUMAN 60S ribosomal protein L32 (Fragment) OS=Homo sapiens GN=RPL32 PE=2 SV=1;>sp|P62910|RL32_HUMAN 60S ribosomal protein L32 OS=Homo sapiens GN=RPL32 PE=1 SV=2;>tr|F8W727|F8W727_HUMAN 60S ribosomal protein L32 OS=Homo sapiens GN=RPL32 PE	326250000	255700000	113400000	27967000	288800000	277230000	333310000	284470000	312360000	291240000	260190000	222450000	305480000	387170000	250150000	221280000	327100000	245530000	211110000	200910000	266420000	234990000	312320000	247820000
D6R9B6		RPS3A	>tr|D6R9B6|D6R9B6_HUMAN 40S ribosomal protein S3a OS=Homo sapiens GN=RPS3A PE=4 SV=1	1	1628100	1	1	1	1835800	2039200	1766400	1	1	1	1	1	1639400	1	786670	1	1	1	2095400	1	1	1	1
D6R9P3;D6RD18;Q99729-3;D6RBZ0;Q99729-2;Q99729-4;Q99729	Heterogeneous nuclear ribonucleoprotein A/B	HNRNPAB	>tr|D6R9P3|D6R9P3_HUMAN Heterogeneous nuclear ribonucleoprotein A/B OS=Homo sapiens GN=HNRNPAB PE=2 SV=1;>tr|D6RD18|D6RD18_HUMAN Heterogeneous nuclear ribonucleoprotein A/B OS=Homo sapiens GN=HNRNPAB PE=2 SV=1;>sp|Q99729-3|ROAA_HUMAN Isoform 3 of Heterogen	290400000	343160000	103170000	128110000	283600000	275090000	238970000	250820000	186160000	231450000	230420000	269430000	287820000	211670000	201680000	171640000	220740000	206170000	229620000	199060000	230560000	206620000	173180000	152490000
D6R9W4;Q16643;Q16643-3;D6RFI1;Q16643-2	Drebrin	DBN1	>tr|D6R9W4|D6R9W4_HUMAN Drebrin (Fragment) OS=Homo sapiens GN=DBN1 PE=2 SV=1;>sp|Q16643|DREB_HUMAN Drebrin OS=Homo sapiens GN=DBN1 PE=1 SV=4;>sp|Q16643-3|DREB_HUMAN Isoform 3 of Drebrin OS=Homo sapiens GN=DBN1;>tr|D6RFI1|D6RFI1_HUMAN Drebrin (Fragment) OS=	1	1	1	1	1	1	1	4122100	1	1	1370000	1	1	1792700	1	1	1	1	10848000	23378000	1	1920300	2785900	1
D6R9Z7;P15954	Cytochrome c oxidase subunit 7C, mitochondrial	COX7C	>tr|D6R9Z7|D6R9Z7_HUMAN Cytochrome c oxidase subunit 7C, mitochondrial OS=Homo sapiens GN=COX7C PE=2 SV=1;>sp|P15954|COX7C_HUMAN Cytochrome c oxidase subunit 7C, mitochondrial OS=Homo sapiens GN=COX7C PE=1 SV=1	1	1	1	1	1	1	11208000	7873300	8915400	4706500	13509000	13379000	27264000	23480000	22401000	20423000	1	26202000	22925000	25857000	40210000	35025000	15045000	1
D6RA57;Q96EY4;H0Y9X1;D6RE67;D6RC31	Translation machinery-associated protein 16	TMA16	>tr|D6RA57|D6RA57_HUMAN Translation machinery-associated protein 16 OS=Homo sapiens GN=TMA16 PE=2 SV=1;>sp|Q96EY4|TMA16_HUMAN Translation machinery-associated protein 16 OS=Homo sapiens GN=TMA16 PE=1 SV=2;>tr|H0Y9X1|H0Y9X1_HUMAN Translation machinery-assoc	18410000	1	1	21797000	1	1	26133000	14792000	9018400	1	13081000	1	16856000	14813000	9049300	11220000	9892100	16006000	23282000	1	7807400	7882700	9971900	9686700
D6RAA6;P57088;H0Y8N0;J3KN43;D6RBY2	Transmembrane protein 33	TMEM33	>tr|D6RAA6|D6RAA6_HUMAN Transmembrane protein 33 (Fragment) OS=Homo sapiens GN=TMEM33 PE=2 SV=1;>sp|P57088|TMM33_HUMAN Transmembrane protein 33 OS=Homo sapiens GN=TMEM33 PE=1 SV=2;>tr|H0Y8N0|H0Y8N0_HUMAN Transmembrane protein 33 (Fragment) OS=Homo sapiens	14309000	10397000	28412000	1	13486000	6336900	29996000	29889000	20695000	22282000	35836000	32672000	131420000	130610000	107830000	101470000	112960000	98796000	68318000	77893000	112520000	126000000	89623000	75247000
D6RAN4;P32969;H0Y9V9;E7ESE0;H0Y9R4	60S ribosomal protein L9	RPL9	>tr|D6RAN4|D6RAN4_HUMAN 60S ribosomal protein L9 (Fragment) OS=Homo sapiens GN=RPL9 PE=4 SV=2;>sp|P32969|RL9_HUMAN 60S ribosomal protein L9 OS=Homo sapiens GN=RPL9 PE=1 SV=1;>tr|H0Y9V9|H0Y9V9_HUMAN 60S ribosomal protein L9 (Fragment) OS=Homo sapiens GN=RPL	490650000	452110000	523560000	445430000	485600000	474890000	523410000	566080000	428790000	447270000	446710000	472890000	560560000	648730000	577320000	612630000	712180000	688290000	384440000	470660000	649160000	650580000	574070000	593770000
D6RE83;P09936;D6R956;D6R974;D6RF53	Ubiquitin carboxyl-terminal hydrolase isozyme L1	UCHL1	>tr|D6RE83|D6RE83_HUMAN Ubiquitin carboxyl-terminal hydrolase isozyme L1 OS=Homo sapiens GN=UCHL1 PE=2 SV=1;>sp|P09936|UCHL1_HUMAN Ubiquitin carboxyl-terminal hydrolase isozyme L1 OS=Homo sapiens GN=UCHL1 PE=1 SV=2;>tr|D6R956|D6R956_HUMAN Ubiquitin carboxy	12737000	13081000	26310000	64425000	35757000	20519000	14380000	13638000	52285000	55002000	57303000	77370000	10960000	12583000	1	7182000	42443000	29684000	12747000	9440700	1	1	13742000	11540000
D6REM4;Q71TU5;P48729;E7ETM0;Q8N752;P48729-2;U3KQ83;U3KPX3;H0Y9X2;U3KQK7	Casein kinase I isoform alpha;Casein kinase I isoform alpha-like	CSNK1A1;CSNK1A1L	>tr|D6REM4|D6REM4_HUMAN Casein kinase I isoform alpha OS=Homo sapiens GN=CSNK1A1 PE=2 SV=1;>tr|Q71TU5|Q71TU5_HUMAN Casein kinase 1, alpha 1, isoform CRA_g OS=Homo sapiens GN=CSNK1A1 PE=2 SV=1;>sp|P48729|KC1A_HUMAN Casein kinase I isoform alpha OS=Homo sapi	1	5617400	1	1	1	6572400	5116300	1	3379500	4410500	6480400	4563900	5029700	6683800	5403600	4495900	1	7764100	4204700	1	6121300	7599300	1	6182000
D6RGI3;Q9NVA2;D6RER5;Q9NVA2-2;D6RDU5;D6RDP1;D6R9Y6;H0Y961;Q14141-2;Q14141-4;B1AMS2;Q14141;F5H1J5;H0Y9G8;Q14141-3;Q92599-3;B4E049;Q92599-2;A6NMH6;A6NFQ9;Q92599-4;F8W8I8;Q92599;C9JV02	Septin-11	SEPT11	>tr|D6RGI3|D6RGI3_HUMAN Septin 11, isoform CRA_b OS=Homo sapiens GN=SEPT11 PE=3 SV=1;>sp|Q9NVA2|SEP11_HUMAN Septin-11 OS=Homo sapiens GN=SEPT11 PE=1 SV=3;>tr|D6RER5|D6RER5_HUMAN Septin-11 OS=Homo sapiens GN=SEPT11 PE=2 SV=1;>sp|Q9NVA2-2|SEP11_HUMAN Isoform	14335000	9866000	17991000	20906000	16483000	15341000	50103000	63898000	32873000	33124000	38323000	62664000	58240000	73655000	13910000	72717000	81532000	92713000	41652000	39739000	36671000	53933000	43293000	40040000
D6RH20;G5EA06;Q92552;B4DRT2;E5RJ73;D6RJC7	28S ribosomal protein S27, mitochondrial	MRPS27	>tr|D6RH20|D6RH20_HUMAN 28S ribosomal protein S27, mitochondrial (Fragment) OS=Homo sapiens GN=MRPS27 PE=2 SV=1;>tr|G5EA06|G5EA06_HUMAN 28S ribosomal protein S27, mitochondrial OS=Homo sapiens GN=MRPS27 PE=4 SV=1;>sp|Q92552|RT27_HUMAN 28S ribosomal protein	17241000	17196000	6470300	1	15183000	13965000	17036000	22105000	18256000	14353000	14845000	14833000	13799000	14547000	11777000	9062400	18068000	15085000	15801000	12836000	1	1	22065000	23061000
E5RGX5;Q93045;Q93045-2	Stathmin;Stathmin-2	STMN2	>tr|E5RGX5|E5RGX5_HUMAN Stathmin OS=Homo sapiens GN=STMN2 PE=2 SV=1;>sp|Q93045|STMN2_HUMAN Stathmin-2 OS=Homo sapiens GN=STMN2 PE=1 SV=3;>sp|Q93045-2|STMN2_HUMAN Isoform 2 of Stathmin-2 OS=Homo sapiens GN=STMN2	11458000	10378000	1	8821400	12817000	15978000	13275000	13556000	20897000	13826000	13248000	9593600	8039100	4559600	1	3341100	11310000	12122000	6099500	4306100	1	1	5761300	1
E5RGY0;B4E1G1;Q9BUN8-2;Q9BUN8	Derlin-1	DERL1	>tr|E5RGY0|E5RGY0_HUMAN Derlin-1 OS=Homo sapiens GN=DERL1 PE=4 SV=1;>tr|B4E1G1|B4E1G1_HUMAN Derlin-1 OS=Homo sapiens GN=DERL1 PE=2 SV=1;>sp|Q9BUN8-2|DERL1_HUMAN Isoform 2 of Derlin-1 OS=Homo sapiens GN=DERL1;>sp|Q9BUN8|DERL1_HUMAN Derlin-1 OS=Homo sapiens	1	1	1	1	1	1	23445000	7111300	1	1	1	1	25420000	17633000	11252000	13933000	15745000	14450000	1	2534300	10137000	9035400	11372000	6354100
E5RHE3;K7ERB8;G3V131;Q68EA5	Zinc finger protein 57	ZNF57	>tr|E5RHE3|E5RHE3_HUMAN Zinc finger protein 57 (Fragment) OS=Homo sapiens GN=ZNF57 PE=2 SV=1;>tr|K7ERB8|K7ERB8_HUMAN Zinc finger protein 57 (Fragment) OS=Homo sapiens GN=ZNF57 PE=2 SV=1;>tr|G3V131|G3V131_HUMAN Putative uncharacterized protein LOC126295 OS=	8145000	14222000	24162000	1	15592000	20771000	25480000	19279000	13586000	16748000	18163000	14561000	1	31655000	1	1	30610000	1	17373000	31747000	1	1	1	1
E5RHG8;Q15369-2;Q15369;R4GMY8	Transcription elongation factor B polypeptide 1	TCEB1	>tr|E5RHG8|E5RHG8_HUMAN Transcription elongation factor B polypeptide 1 (Fragment) OS=Homo sapiens GN=TCEB1 PE=2 SV=1;>sp|Q15369-2|ELOC_HUMAN Isoform 2 of Transcription elongation factor B polypeptide 1 OS=Homo sapiens GN=TCEB1;>sp|Q15369|ELOC_HUMAN Transc	1	1	2988100	1	5122200	2651200	4940300	4192400	5998700	6155300	5081400	5613100	5586200	6476300	1	2379000	9684200	10066000	5155900	4765600	1	1	6302700	5213000
E5RIC7;Q969P6-2;Q969P6	DNA topoisomerase I, mitochondrial	TOP1MT	>tr|E5RIC7|E5RIC7_HUMAN DNA topoisomerase I, mitochondrial (Fragment) OS=Homo sapiens GN=TOP1MT PE=4 SV=2;>sp|Q969P6-2|TOP1M_HUMAN Isoform 2 of DNA topoisomerase I, mitochondrial OS=Homo sapiens GN=TOP1MT;>sp|Q969P6|TOP1M_HUMAN DNA topoisomerase I, mitocho	11304000	1	1	1	11860000	13538000	11478000	9859800	9341600	9361300	1	10013000	14311000	15734000	1	1	1	1	12508000	18128000	1	1	1	1
E5RIW3;O75347;E5RJD8;E5RHG6;B4DT30;E5RIX8	Tubulin-specific chaperone A	TBCA	>tr|E5RIW3|E5RIW3_HUMAN Tubulin-specific chaperone A OS=Homo sapiens GN=TBCA PE=2 SV=1;>sp|O75347|TBCA_HUMAN Tubulin-specific chaperone A OS=Homo sapiens GN=TBCA PE=1 SV=3;>tr|E5RJD8|E5RJD8_HUMAN Tubulin-specific chaperone A OS=Homo sapiens GN=TBCA PE=2 SV	13741000	13384000	51254000	1	34172000	43243000	32267000	47059000	41712000	13171000	35407000	52620000	22419000	14446000	15807000	7973600	52340000	82996000	12986000	11749000	1	3969200	9113000	23052000
E5RJB8;E5RHU3;E7ESK6;E9PBI9;P34741	Syndecan;Syndecan-2	SDC2	>tr|E5RJB8|E5RJB8_HUMAN Syndecan-2 (Fragment) OS=Homo sapiens GN=SDC2 PE=4 SV=1;>tr|E5RHU3|E5RHU3_HUMAN Syndecan-2 (Fragment) OS=Homo sapiens GN=SDC2 PE=2 SV=2;>tr|E7ESK6|E7ESK6_HUMAN Syndecan OS=Homo sapiens GN=SDC2 PE=2 SV=1;>tr|E9PBI9|E9PBI9_HUMAN Synde	1	1	1	1	1	1	3589000	3273100	3843900	4871900	2342500	1	6914700	9564500	11152000	7616000	9987000	12084000	9655000	7121600	508020	5972500	17502000	17359000
E5RJV5;E5RGS2;Q9H6H4;Q9H6H4-2	Receptor expression-enhancing protein 4	REEP4	>tr|E5RJV5|E5RJV5_HUMAN Receptor expression-enhancing protein 4 (Fragment) OS=Homo sapiens GN=REEP4 PE=2 SV=1;>tr|E5RGS2|E5RGS2_HUMAN Receptor expression-enhancing protein 4 OS=Homo sapiens GN=REEP4 PE=2 SV=1;>sp|Q9H6H4|REEP4_HUMAN Receptor expression-enha	3590200	2717400	9110800	1	1	3751200	28638000	31390000	1	22648000	30492000	25717000	47007000	37899000	50179000	58201000	29785000	25809000	26604000	42290000	27939000	26386000	39064000	32487000
E7END7;P62820;P62820-2;B7Z8M7;P62820-3;E7ETK2;Q92928	Ras-related protein Rab-1A	RAB1A	>tr|E7END7|E7END7_HUMAN Ras-related protein Rab-1A OS=Homo sapiens GN=RAB1A PE=2 SV=1;>sp|P62820|RAB1A_HUMAN Ras-related protein Rab-1A OS=Homo sapiens GN=RAB1A PE=1 SV=3;>sp|P62820-2|RAB1A_HUMAN Isoform 2 of Ras-related protein Rab-1A OS=Homo sapiens GN=R	14069000	31770000	13336000	78033000	46800000	44986000	74440000	68477000	58653000	83075000	80249000	85184000	101210000	90597000	129890000	134470000	129990000	139010000	64494000	55618000	115790000	115930000	85535000	98542000
E7ENL1;B4DQT1;Q7L5Y9-3;B4DVN3;Q7L5Y9;E7ESC7;D6RE80;Q7L5Y9-2	Macrophage erythroblast attacher	MAEA	>tr|E7ENL1|E7ENL1_HUMAN Macrophage erythroblast attacher OS=Homo sapiens GN=MAEA PE=2 SV=1;>tr|B4DQT1|B4DQT1_HUMAN Macrophage erythroblast attacher OS=Homo sapiens GN=MAEA PE=2 SV=1;>sp|Q7L5Y9-3|MAEA_HUMAN Isoform 3 of Macrophage erythroblast attacher OS=H	6893700	7091900	1	1	16838000	12629000	10958000	8217200	7589200	11806000	8881100	7217300	3976900	7171200	1	1	1	1	8061300	8208000	1	1	1	1
E7ESW5;Q5T5U3-3;F8W9U9;Q5T5U3	Rho GTPase-activating protein 21	ARHGAP21	>tr|E7ESW5|E7ESW5_HUMAN Rho GTPase-activating protein 21 (Fragment) OS=Homo sapiens GN=ARHGAP21 PE=2 SV=1;>sp|Q5T5U3-3|RHG21_HUMAN Isoform 3 of Rho GTPase-activating protein 21 OS=Homo sapiens GN=ARHGAP21;>tr|F8W9U9|F8W9U9_HUMAN Rho GTPase-activating prote	8495600	1986500	1	1	4588900	4548200	344550	1	3087200	3680500	1	3289500	1	29912000	2045300	2119700	1837700	349280	1	1	314210	2741900	429580	2619000
E7ETZ4;Q9Y6E2;B5MCH7;Q75MG1;B5MCE7;E7EMS9;C9JF98;E9PFD4;F8WDX8	Basic leucine zipper and W2 domain-containing protein 2	BZW2	>tr|E7ETZ4|E7ETZ4_HUMAN Basic leucine zipper and W2 domain-containing protein 2 (Fragment) OS=Homo sapiens GN=BZW2 PE=2 SV=1;>sp|Q9Y6E2|BZW2_HUMAN Basic leucine zipper and W2 domain-containing protein 2 OS=Homo sapiens GN=BZW2 PE=1 SV=1;>tr|B5MCH7|B5MCH7_H	2793600	786840	6977500	7313600	1625500	2739600	336470000	305400000	147720000	167840000	269720000	291880000	1098500000	1006400000	1116500000	1181100000	1136400000	1046800000	458710000	423210000	747300000	719350000	501920000	566520000
E7EU96;P68400;Q8NEV1;P68400-2;V9GYA2;V9GY80	Casein kinase II subunit alpha;Casein kinase II subunit alpha 3	CSNK2A1;CSNK2A3	>tr|E7EU96|E7EU96_HUMAN Casein kinase II subunit alpha OS=Homo sapiens GN=CSNK2A1 PE=2 SV=1;>sp|P68400|CSK21_HUMAN Casein kinase II subunit alpha OS=Homo sapiens GN=CSNK2A1 PE=1 SV=1;>sp|Q8NEV1|CSK23_HUMAN Casein kinase II subunit alpha 3 OS=Homo sapiens G	129590000	164970000	133750000	123130000	147550000	185450000	91632000	109490000	94019000	95894000	82257000	93003000	82270000	75530000	51449000	19742000	89781000	68864000	121510000	166180000	78134000	121480000	165280000	146200000
E7EWP2;E7EPJ7;O75962-5;O75962-2;O75962-4;O75962	Triple functional domain protein	TRIO	>tr|E7EWP2|E7EWP2_HUMAN Triple functional domain protein OS=Homo sapiens GN=TRIO PE=2 SV=2;>tr|E7EPJ7|E7EPJ7_HUMAN Triple functional domain protein (Fragment) OS=Homo sapiens GN=TRIO PE=2 SV=2;>sp|O75962-5|TRIO_HUMAN Isoform 5 of Triple functional domain p	1	1	1	1	1	1	1	1	1	1	1	1	1	1	1	1	1	1	1	1	1	1	1	1
E7EX73;E9PGM1;E7EUU4;Q04637-8;Q04637-7;Q04637-5;Q04637-4;Q04637-3;Q04637;Q04637-9;Q04637-6;C9JF13;C9J6B6;H7C044;C9K073;C9J2Z7;H7C0V6;F5H8J4;F5H564;O43432-4;O43432;O43432-3;F8WCF2;REV__Q8NEG2-2;C9JHW9;REV__Q8NEG2;REV__F5H7J8;REV__C9JQZ6;REV__J3KQX6	Eukaryotic translation initiation factor 4 gamma 1	EIF4G1	>tr|E7EX73|E7EX73_HUMAN Eukaryotic translation initiation factor 4 gamma 1 OS=Homo sapiens GN=EIF4G1 PE=2 SV=1;>tr|E9PGM1|E9PGM1_HUMAN Eukaryotic translation initiation factor 4 gamma 1 OS=Homo sapiens GN=EIF4G1 PE=2 SV=1;>tr|E7EUU4|E7EUU4_HUMAN Eukaryotic	191820000	191880000	376420000	329700000	211480000	191770000	171960000	191680000	166970000	163820000	164550000	158440000	117760000	128340000	113130000	157530000	150150000	143780000	95857000	94421000	85726000	102650000	128360000	119380000
E9PBA6;F5H3X0;E3W994;J3KR49;O75122;F5H604;E7ERI8;E7EW49;H0Y5T1;F5H2E2;F5GWM7;Q7Z460-2;Q7Z460-4;F5GWS0;Q7Z460-3;F8WA11;Q7Z460	CLIP-associating protein 2;CLIP-associating protein 1	CLASP2;CLASP1	>tr|E9PBA6|E9PBA6_HUMAN CLIP-associating protein 2 OS=Homo sapiens GN=CLASP2 PE=2 SV=2;>tr|F5H3X0|F5H3X0_HUMAN CLIP-associating protein 2 OS=Homo sapiens GN=CLASP2 PE=2 SV=1;>tr|E3W994|E3W994_HUMAN CLIP-associating protein 2 OS=Homo sapiens GN=CLASP2 PE=2	1	1897000	1	1	2525700	2475700	2971300	3009000	2481300	1	1	1799700	1	1224300	1647000	1	1611100	2165800	1	891150	2533000	1	1016300	2012500
E9PC15;Q53H12;E9PG39	Acylglycerol kinase, mitochondrial	AGK	>tr|E9PC15|E9PC15_HUMAN Acylglycerol kinase, mitochondrial OS=Homo sapiens GN=AGK PE=2 SV=1;>sp|Q53H12|AGK_HUMAN Acylglycerol kinase, mitochondrial OS=Homo sapiens GN=AGK PE=1 SV=2;>tr|E9PG39|E9PG39_HUMAN Acylglycerol kinase, mitochondrial OS=Homo sapiens	20936000	14866000	11170000	19600000	28535000	22912000	97789000	108460000	100270000	83710000	98467000	81721000	127890000	127980000	165780000	195860000	144040000	112940000	140780000	118530000	140060000	125220000	139430000	141030000
E9PC52;Q16576;Q16576-2;Q5JP02;Q5JP01;Q5JNZ6;C9JAJ9;C9J7L0	Histone-binding protein RBBP7	RBBP7	>tr|E9PC52|E9PC52_HUMAN Histone-binding protein RBBP7 OS=Homo sapiens GN=RBBP7 PE=2 SV=1;>sp|Q16576|RBBP7_HUMAN Histone-binding protein RBBP7 OS=Homo sapiens GN=RBBP7 PE=1 SV=1;>sp|Q16576-2|RBBP7_HUMAN Isoform 2 of Histone-binding protein RBBP7 OS=Homo sap	25263000	1	1	19356000	24281000	26046000	24920000	18947000	23960000	21210000	20347000	23860000	12439000	15214000	1	20246000	19253000	10793000	17718000	17362000	12927000	16898000	19445000	1
E9PC74;Q13144;C9JRD9;H7C2X0	Translation initiation factor eIF-2B subunit epsilon	EIF2B5	>tr|E9PC74|E9PC74_HUMAN Translation initiation factor eIF-2B subunit epsilon OS=Homo sapiens GN=EIF2B5 PE=2 SV=1;>sp|Q13144|EI2BE_HUMAN Translation initiation factor eIF-2B subunit epsilon OS=Homo sapiens GN=EIF2B5 PE=1 SV=3	1	3128900	1	1	3784400	3053000	16081000	16487000	6158700	6258100	11346000	8811000	43057000	75650000	56996000	45309000	89426000	80237000	15627000	18384000	55396000	41818000	28882000	22398000
E9PD53;Q9NTJ3;Q9NTJ3-2;C9JR83;C9JVD8;C9J578;C9J9E4;C9JWF0;C9IYK2;C9JJ64	Structural maintenance of chromosomes protein;Structural maintenance of chromosomes protein 4	SMC4	>tr|E9PD53|E9PD53_HUMAN Structural maintenance of chromosomes protein OS=Homo sapiens GN=SMC4 PE=2 SV=1;>sp|Q9NTJ3|SMC4_HUMAN Structural maintenance of chromosomes protein 4 OS=Homo sapiens GN=SMC4 PE=1 SV=2;>sp|Q9NTJ3-2|SMC4_HUMAN Isoform 2 of Structural	59463000	55318000	18351000	18265000	57959000	62008000	177900000	204390000	131590000	148500000	146600000	144390000	269810000	273620000	291530000	287590000	238070000	243060000	202400000	221640000	270850000	206880000	235810000	282230000
E9PDE8;O95757;E7ES43;D6RJ96	Heat shock 70 kDa protein 4L	HSPA4L	>tr|E9PDE8|E9PDE8_HUMAN Heat shock 70 kDa protein 4L OS=Homo sapiens GN=HSPA4L PE=2 SV=1;>sp|O95757|HS74L_HUMAN Heat shock 70 kDa protein 4L OS=Homo sapiens GN=HSPA4L PE=1 SV=3;>tr|E7ES43|E7ES43_HUMAN Heat shock 70 kDa protein 4L OS=Homo sapiens GN=HSPA4L	1	1	1	1	5956700	6551100	6155300	7363100	6268700	1	4487000	3852400	6884900	6713100	1	1	1	1	4855900	6967800	1	1	6003700	7969100
E9PDU5;Q9NNW5;E9PBK6;C9K020;C9JFP6;V9GYU1;V9GZ65	WD repeat-containing protein 6	WDR6	>tr|E9PDU5|E9PDU5_HUMAN WD repeat-containing protein 6 OS=Homo sapiens GN=WDR6 PE=2 SV=1;>sp|Q9NNW5|WDR6_HUMAN WD repeat-containing protein 6 OS=Homo sapiens GN=WDR6 PE=1 SV=1;>tr|E9PBK6|E9PBK6_HUMAN WD repeat-containing protein 6 OS=Homo sapiens GN=WDR6 P	21791000	20342000	226540000	1	23089000	19727000	40299000	23462000	27868000	12790000	60034000	32092000	52285000	63136000	40810000	32042000	34874000	44563000	75120000	81255000	65328000	58740000	108710000	111330000
E9PE17;Q9Y2R5;I3L0E3	28S ribosomal protein S17, mitochondrial	MRPS17	>tr|E9PE17|E9PE17_HUMAN 28S ribosomal protein S17, mitochondrial (Fragment) OS=Homo sapiens GN=MRPS17 PE=3 SV=1;>sp|Q9Y2R5|RT17_HUMAN 28S ribosomal protein S17, mitochondrial OS=Homo sapiens GN=MRPS17 PE=2 SV=1;>tr|I3L0E3|I3L0E3_HUMAN 28S ribosomal protein	17179000	51487000	58834000	19082000	23514000	47478000	20055000	28226000	34226000	41015000	1	1	16498000	15789000	10002000	4061000	6186100	9964400	1	12056000	10904000	9822500	14403000	11372000
E9PF19;Q9Y4P3;C9JVF0	Transducin beta-like protein 2	TBL2	>tr|E9PF19|E9PF19_HUMAN Transducin beta-like protein 2 OS=Homo sapiens GN=TBL2 PE=2 SV=1;>sp|Q9Y4P3|TBL2_HUMAN Transducin beta-like protein 2 OS=Homo sapiens GN=TBL2 PE=1 SV=1	3187400	5861700	1	58238000	6407700	6939900	23170000	23270000	15452000	11982000	22479000	25203000	46876000	35248000	41255000	46193000	24993000	22493000	30153000	40683000	24959000	23184000	32574000	33948000
E9PFF5;P51114-2;P51114;E7EU85;P51114-3;B4DXZ6;C9JZE0;C9JY20;C9JYQ6;C9IZ22	Fragile X mental retardation syndrome-related protein 1	FXR1	>tr|E9PFF5|E9PFF5_HUMAN Fragile X mental retardation syndrome-related protein 1 OS=Homo sapiens GN=FXR1 PE=2 SV=1;>sp|P51114-2|FXR1_HUMAN Isoform 2 of Fragile X mental retardation syndrome-related protein 1 OS=Homo sapiens GN=FXR1;>sp|P51114|FXR1_HUMAN Fra	24160000	52859000	8965700	30681000	38380000	1	14533000	19476000	17604000	23605000	11751000	15617000	17923000	11325000	14441000	15824000	17285000	18514000	1	12207000	12491000	21702000	11001000	11971000
E9PGB5;Q6P4A7;Q6P4A7-3;Q6P4A7-2	Sideroflexin-4	SFXN4	>tr|E9PGB5|E9PGB5_HUMAN Sideroflexin-4 OS=Homo sapiens GN=SFXN4 PE=2 SV=1;>sp|Q6P4A7|SFXN4_HUMAN Sideroflexin-4 OS=Homo sapiens GN=SFXN4 PE=1 SV=1;>sp|Q6P4A7-3|SFXN4_HUMAN Isoform 3 of Sideroflexin-4 OS=Homo sapiens GN=SFXN4;>sp|Q6P4A7-2|SFXN4_HUMAN Isofor	1	1	1	1	1	1	1	1	1	1	1	1	2292100	5558600	1	1	1	1	2474400	1	1	1	1	1
E9PH82;Q8NCA5-2;Q8NCA5;B4DT23	Protein FAM98A	FAM98A	>tr|E9PH82|E9PH82_HUMAN Protein FAM98A OS=Homo sapiens GN=FAM98A PE=2 SV=1;>sp|Q8NCA5-2|FA98A_HUMAN Isoform 2 of Protein FAM98A OS=Homo sapiens GN=FAM98A;>sp|Q8NCA5|FA98A_HUMAN Protein FAM98A OS=Homo sapiens GN=FAM98A PE=1 SV=1;>tr|B4DT23|B4DT23_HUMAN Prot	48398000	30583000	28655000	27992000	34900000	37179000	24224000	19369000	27478000	21771000	28636000	29168000	17368000	14157000	25970000	30098000	37377000	22994000	1	22546000	25955000	28378000	33927000	28516000
E9PHA2;Q15003;B4E189;H7C415;C9J470;C9JZP1	Condensin complex subunit 2	NCAPH	>tr|E9PHA2|E9PHA2_HUMAN Condensin complex subunit 2 OS=Homo sapiens GN=NCAPH PE=2 SV=1;>sp|Q15003|CND2_HUMAN Condensin complex subunit 2 OS=Homo sapiens GN=NCAPH PE=1 SV=3;>tr|B4E189|B4E189_HUMAN Condensin complex subunit 2 OS=Homo sapiens GN=NCAPH PE=2 SV	1	1	1	1	8662300	1	7465600	8729600	9628200	8269100	9657400	7869900	8203800	5885300	8417100	8077900	8006900	8381000	6312600	5469900	1	1	6312200	1
E9PJH7;Q9H936;K4DIA8;K4DIA2;K4DIB0;K4DIB2;E9PQ36;K4DIB8;E9PI74;K4DIB3;E9PS95;Q9H1K4;E9PJY0;K4DIB6;K4DIB1	Mitochondrial glutamate carrier 1;Mitochondrial glutamate carrier 2	SLC25A22;SLC25A18	>tr|E9PJH7|E9PJH7_HUMAN Mitochondrial glutamate carrier 1 (Fragment) OS=Homo sapiens GN=SLC25A22 PE=2 SV=2;>sp|Q9H936|GHC1_HUMAN Mitochondrial glutamate carrier 1 OS=Homo sapiens GN=SLC25A22 PE=1 SV=1;>tr|K4DIA8|K4DIA8_HUMAN Mitochondrial glutamate carrier	9755200	1	1	1	1	1	1	12482000	1	9682400	13432000	12570000	14095000	17342000	12239000	15691000	10653000	13841000	17029000	13393000	17702000	17846000	16584000	16804000
E9PK01;P29692;P29692-2;E9PRY8;E9PQ49;E9PI39;P29692-3;E9PPR1;E9PL12;P29692-4;E9PMW7;E9PL71;E9PQZ1;E9PIZ1;H0YCK7;E9PN91;E9PK06;E9PK72;E9PKK3;H0YE58;H0YE72;E9PNW6;E9PQC9;E9PJD0	Elongation factor 1-delta	EEF1D	>tr|E9PK01|E9PK01_HUMAN Elongation factor 1-delta (Fragment) OS=Homo sapiens GN=EEF1D PE=2 SV=1;>sp|P29692|EF1D_HUMAN Elongation factor 1-delta OS=Homo sapiens GN=EEF1D PE=1 SV=5;>sp|P29692-2|EF1D_HUMAN Isoform 2 of Elongation factor 1-delta OS=Homo sapien	674890000	852550000	629620000	573700000	766610000	737260000	478400000	476730000	483330000	449490000	428310000	429950000	243840000	287450000	199580000	203580000	228430000	301620000	282800000	303540000	310900000	323560000	336670000	308570000
E9PK54		HSPA8	>tr|E9PK54|E9PK54_HUMAN Heat shock cognate 71 kDa protein (Fragment) OS=Homo sapiens GN=HSPA8 PE=2 SV=2	1	1	1	1	1	1	1	3700300	1	1	1	1	1	1	1	4878400	3180600	1	1	1	1	1	3431800	1
E9PKG1;Q99873-3;Q99873-2;Q99873-4;Q99873;H7C2I1;E9PQ98;E9PIX6;E9PNR9;H0YDE4;Q9NR22-2;Q9NR22;E9PMZ2;E9PMW9;E9PI83	Protein arginine N-methyltransferase 1	PRMT1	>tr|E9PKG1|E9PKG1_HUMAN Protein arginine N-methyltransferase 1 OS=Homo sapiens GN=PRMT1 PE=2 SV=1;>sp|Q99873-3|ANM1_HUMAN Isoform 3 of Protein arginine N-methyltransferase 1 OS=Homo sapiens GN=PRMT1;>sp|Q99873-2|ANM1_HUMAN Isoform 2 of Protein arginine N-m	781290000	787320000	480650000	397370000	717470000	734090000	384050000	415200000	393620000	413750000	320960000	387470000	253610000	232700000	196370000	199300000	253880000	290000000	282950000	270060000	348660000	371120000	304960000	324730000
E9PL01;Q15005;E9PI68;E9PRB9;H0YE04	Signal peptidase complex subunit 2	SPCS2	>tr|E9PL01|E9PL01_HUMAN Signal peptidase complex subunit 2 OS=Homo sapiens GN=SPCS2 PE=2 SV=1;>sp|Q15005|SPCS2_HUMAN Signal peptidase complex subunit 2 OS=Homo sapiens GN=SPCS2 PE=1 SV=3;>tr|E9PI68|E9PI68_HUMAN Signal peptidase complex subunit 2 OS=Homo sa	1	8108000	9009700	14725000	9241800	9754900	9731400	9592900	10744000	6664700	10522000	7033000	8799400	10103000	1	1	8390900	7612700	9724600	9515100	4127900	1	16463000	12882000
E9PLB2		IPO7	>tr|E9PLB2|E9PLB2_HUMAN Importin-7 (Fragment) OS=Homo sapiens GN=IPO7 PE=2 SV=2	29742000	27857000	24364000	1	26768000	28059000	39903000	42666000	37348000	38991000	36580000	39285000	1	39319000	1	1	1	1	1	38376000	1	1	41220000	41280000
E9PLB8;E9PL33;E9PM05;E9PS58;A6NES3;O14681;E9PQN7;E9PK61	Etoposide-induced protein 2.4 homolog	EI24	>tr|E9PLB8|E9PLB8_HUMAN Etoposide-induced protein 2.4 homolog (Fragment) OS=Homo sapiens GN=EI24 PE=2 SV=2;>tr|E9PL33|E9PL33_HUMAN Etoposide-induced protein 2.4 homolog (Fragment) OS=Homo sapiens GN=EI24 PE=2 SV=1;>tr|E9PM05|E9PM05_HUMAN Etoposide-induced	673450	1	1	1	1550900	1	1	12553000	8740300	9089900	7372800	8215200	23774000	28495000	11638000	28223000	13256000	15459000	8299800	10124000	13370000	1	9098000	8215400
E9PLD3;E9PRG8		C11orf48	>tr|E9PLD3|E9PLD3_HUMAN Uncharacterized protein OS=Homo sapiens PE=4 SV=1;>tr|E9PRG8|E9PRG8_HUMAN Uncharacterized protein C11orf48 OS=Homo sapiens GN=C11orf48 PE=2 SV=1	7689700	1	10524000	1	9452100	9739300	10805000	12781000	8785000	9095100	7973400	10158000	8891800	10614000	1	1	11333000	14334000	7910600	7003300	10240000	1	8345700	7926000
E9PLK3;P55786;B7Z463;E5RJ24;E7EWZ2;I3L083;A6NEC2;F5GZY4;H0YAQ6;H0YCQ5;E9PJY4;E9PPD4;A6NEC2-3;H0YDG0;E9PP11;A6NEC2-2	Puromycin-sensitive aminopeptidase	NPEPPS	>tr|E9PLK3|E9PLK3_HUMAN Puromycin-sensitive aminopeptidase OS=Homo sapiens GN=NPEPPS PE=2 SV=1;>sp|P55786|PSA_HUMAN Puromycin-sensitive aminopeptidase OS=Homo sapiens GN=NPEPPS PE=1 SV=2;>tr|B7Z463|B7Z463_HUMAN Uncharacterized protein OS=Homo sapiens GN=NP	10378000	5843900	24968000	22862000	5923400	10346000	23485000	15035000	20920000	23553000	34119000	21244000	25559000	54084000	42799000	11055000	31898000	38634000	14127000	1	13177000	10692000	17048000	21072000
E9PLL6;P46776;E9PJD9;E9PLX7;E9PKT2;H0YF34	60S ribosomal protein L27a	RPL27A	>tr|E9PLL6|E9PLL6_HUMAN 60S ribosomal protein L27a OS=Homo sapiens GN=RPL27A PE=2 SV=1;>sp|P46776|RL27A_HUMAN 60S ribosomal protein L27a OS=Homo sapiens GN=RPL27A PE=1 SV=2;>tr|E9PJD9|E9PJD9_HUMAN 60S ribosomal protein L27a OS=Homo sapiens GN=RPL27A PE=3 S	440100000	445390000	529310000	425530000	464930000	407030000	532660000	608940000	404730000	462260000	358700000	420960000	452410000	563970000	529490000	503660000	533620000	523510000	266880000	378150000	483870000	633170000	399950000	404780000
E9PLT0;O75534-2;O75534;O75534-3;O75534-4;E9PNG3	Cold shock domain-containing protein E1	CSDE1	>tr|E9PLT0|E9PLT0_HUMAN Cold shock domain-containing protein E1 OS=Homo sapiens GN=CSDE1 PE=2 SV=1;>sp|O75534-2|CSDE1_HUMAN Isoform 2 of Cold shock domain-containing protein E1 OS=Homo sapiens GN=CSDE1;>sp|O75534|CSDE1_HUMAN Cold shock domain-containing pr	30800000	28740000	34729000	30571000	36239000	47502000	18393000	21376000	33110000	34687000	32323000	32002000	33094000	16598000	24285000	19989000	27303000	27857000	11546000	12780000	16065000	11244000	16716000	16264000
E9PN17;O75964	ATP synthase subunit g, mitochondrial	ATP5L	>tr|E9PN17|E9PN17_HUMAN ATP synthase subunit g, mitochondrial OS=Homo sapiens GN=ATP5L PE=2 SV=1;>sp|O75964|ATP5L_HUMAN ATP synthase subunit g, mitochondrial OS=Homo sapiens GN=ATP5L PE=1 SV=3	1	16267000	22525000	1	1	18513000	20942000	30553000	19406000	24062000	29666000	27104000	31615000	26419000	27886000	30220000	52127000	36385000	8164400	30960000	27509000	29282000	62415000	38995000
E9PN51;F8W9K7;E9PPW7;O00217;E9PKH6	NADH dehydrogenase [ubiquinone] iron-sulfur protein 8, mitochondrial	NDUFS8	>tr|E9PN51|E9PN51_HUMAN NADH dehydrogenase [ubiquinone] iron-sulfur protein 8, mitochondrial (Fragment) OS=Homo sapiens GN=NDUFS8 PE=2 SV=1;>tr|F8W9K7|F8W9K7_HUMAN NADH dehydrogenase [ubiquinone] iron-sulfur protein 8, mitochondrial (Fragment) OS=Homo sapi	4810600	2973200	1	1	4220300	5204100	6043500	6240700	5245500	3206200	5154300	5297500	1	6405400	1	1	6114300	7584700	6266600	4367400	1	1	6775600	6580600
E9PN89		HSPA8	>tr|E9PN89|E9PN89_HUMAN Heat shock cognate 71 kDa protein (Fragment) OS=Homo sapiens GN=HSPA8 PE=2 SV=1	1	849160	1	1	950910	1	1	1	757130	1	1	1	1	1	1	1	1	1	1	1	16209000	13942000	1	1
E9PR16;G3V198;Q12769;Q12769-3	Nuclear pore complex protein Nup160	NUP160	>tr|E9PR16|E9PR16_HUMAN Nuclear pore complex protein Nup160 OS=Homo sapiens GN=NUP160 PE=2 SV=1;>tr|G3V198|G3V198_HUMAN Nuclear pore complex protein Nup160 OS=Homo sapiens GN=NUP160 PE=4 SV=1;>sp|Q12769|NU160_HUMAN Nuclear pore complex protein Nup160 OS=Ho	1	1	1	1	1	1	1	1	1	1	4703300	6077600	10173000	8129500	1	757530	14138000	1	4674800	5131200	1	1	1	1875900
E9PR38;E7EWT3;H0YEH2;Q14671-4;Q14671-2;Q14671;Q14671-3;Q5T1Z4;Q5T1Z8;H0YDK8;Q8TB72-2;Q8TB72-4;Q8TB72-3;Q8TB72	Pumilio homolog 1;Pumilio homolog 2	PUM1;PUM2	>tr|E9PR38|E9PR38_HUMAN Pumilio homolog 1 OS=Homo sapiens GN=PUM1 PE=2 SV=1;>tr|E7EWT3|E7EWT3_HUMAN Pumilio homolog 1 OS=Homo sapiens GN=PUM1 PE=2 SV=1;>tr|H0YEH2|H0YEH2_HUMAN Pumilio homolog 1 (Fragment) OS=Homo sapiens GN=PUM1 PE=4 SV=1;>sp|Q14671-4|PUM1	9195900	10523000	1	4660800	9935400	14080000	10598000	10492000	10907000	6795300	11466000	6771800	6577900	7089900	1	1	5701900	6482900	6554600	6678800	1	1	1	1
F5GWP8;K7ESE1;C9J826;C9JK18;C9JKY1;C9JTX4		JUP	>tr|F5GWP8|F5GWP8_HUMAN Junction plakoglobin OS=Homo sapiens GN=JUP PE=2 SV=1	846220	644650	22195000	20556000	8135600	9028400	4524600	14079000	9290800	10910000	154900000	180130000	1	4772300	2909100	1911300	1528100	3546700	1359700	2589500	3971800	9919400	1	605420
F5GX39;E7EQ72;Q15363	Transmembrane emp24 domain-containing protein 2	TMED2	>tr|F5GX39|F5GX39_HUMAN Transmembrane emp24 domain-containing protein 2 OS=Homo sapiens GN=TMED2 PE=2 SV=1;>tr|E7EQ72|E7EQ72_HUMAN Transmembrane emp24 domain-containing protein 2 (Fragment) OS=Homo sapiens GN=TMED2 PE=2 SV=2;>sp|Q15363|TMED2_HUMAN Transmem	4503700	7108200	3218700	3016500	6843300	7566900	12026000	9823300	10188000	10083000	9006500	9539900	8477600	8946800	1	1	13971000	17880000	11555000	11786000	1	18822000	15391000	20597000
F5GX77;Q9UI30-2;Q9UI30;M0R242;F5GYQ2	tRNA methyltransferase 112 homolog	TRMT112	>tr|F5GX77|F5GX77_HUMAN tRNA methyltransferase 112 homolog OS=Homo sapiens GN=TRMT112 PE=2 SV=1;>sp|Q9UI30-2|TR112_HUMAN Isoform 2 of tRNA methyltransferase 112 homolog OS=Homo sapiens GN=TRMT112;>sp|Q9UI30|TR112_HUMAN tRNA methyltransferase 112 homolog OS	5964100	5638100	15523000	17489000	5357400	6634100	6692800	6250900	7446100	7282400	5362600	4877800	5901100	6606900	17414000	1	13183000	9465700	5061900	4625400	1	1	11419000	21077000
F5GXT8;F5H796;Q9NR28-2;Q9NR28-3;Q9NR28;F5GYH3;F5GX50	Diablo homolog, mitochondrial	DIABLO	>tr|F5GXT8|F5GXT8_HUMAN Diablo homolog, mitochondrial (Fragment) OS=Homo sapiens GN=DIABLO PE=2 SV=1;>tr|F5H796|F5H796_HUMAN Diablo homolog, mitochondrial (Fragment) OS=Homo sapiens GN=DIABLO PE=2 SV=2;>sp|Q9NR28-2|DBLOH_HUMAN Isoform 2 of Diablo homolog,	4271800	6651500	1	11877000	6929200	6926100	6493400	7024500	6184400	7535500	6832600	6486200	1	7241800	1	1	1	7079500	5341100	4174500	1	5386400	1	4731000
F5GXX5;P61803;F5H895	Dolichyl-diphosphooligosaccharide--protein glycosyltransferase subunit DAD1	DAD1	>tr|F5GXX5|F5GXX5_HUMAN Dolichyl-diphosphooligosaccharide--protein glycosyltransferase subunit DAD1 OS=Homo sapiens GN=DAD1 PE=2 SV=1;>sp|P61803|DAD1_HUMAN Dolichyl-diphosphooligosaccharide--protein glycosyltransferase subunit DAD1 OS=Homo sapiens GN=DAD1	1	1	1	20033000	1	1	1	6543000	8652700	1	4650300	5098700	9424600	16365000	13813000	1	14683000	1	11256000	4695000	1	10178000	10681000	13529000
F5GYN4;Q96FW1;F5H6Q1;F5GYJ8;J3KR44;F5H3F0;Q96FW1-2	Ubiquitin thioesterase OTUB1	OTUB1	>tr|F5GYN4|F5GYN4_HUMAN Ubiquitin thioesterase OTUB1 OS=Homo sapiens GN=OTUB1 PE=2 SV=1;>sp|Q96FW1|OTUB1_HUMAN Ubiquitin thioesterase OTUB1 OS=Homo sapiens GN=OTUB1 PE=1 SV=2;>tr|F5H6Q1|F5H6Q1_HUMAN Ubiquitin thioesterase OTUB1 OS=Homo sapiens GN=OTUB1 PE=	8998000	1	1	19118000	11184000	30947000	13901000	13765000	35938000	29149000	18522000	9521200	6279500	10010000	13649000	1	21267000	16787000	6028600	5781200	10641000	9029600	8574600	11371000
F5GYV5;H7BZV4;Q66PJ3-7;F8WCT1;Q66PJ3-4;Q66PJ3-3;Q66PJ3-2;Q66PJ3;F8WEP2;Q66PJ3-5;F5H7X4	ADP-ribosylation factor-like protein 6-interacting protein 4	ARL6IP4	>tr|F5GYV5|F5GYV5_HUMAN ADP-ribosylation factor-like protein 6-interacting protein 4 (Fragment) OS=Homo sapiens GN=ARL6IP4 PE=4 SV=1;>tr|H7BZV4|H7BZV4_HUMAN ADP-ribosylation factor-like protein 6-interacting protein 4 (Fragment) OS=Homo sapiens GN=ARL6IP4	40927000	19594000	17651000	34611000	7410000	8088200	8609700	9578100	16860000	17918000	5353100	5969400	4836600	5234700	5135700	1	1	4265200	32176000	17599000	1	6876000	4314800	4978100
F5GZJ1;Q15021;E7EN77;F5GZK7	Condensin complex subunit 1	NCAPD2	>tr|F5GZJ1|F5GZJ1_HUMAN Condensin complex subunit 1 OS=Homo sapiens GN=NCAPD2 PE=2 SV=1;>sp|Q15021|CND1_HUMAN Condensin complex subunit 1 OS=Homo sapiens GN=NCAPD2 PE=1 SV=3	5235000	1	1	6665500	5448000	4304400	10248000	7423500	7332300	7682100	7800800	8175800	11673000	10841000	1	1	12006000	15540000	5605200	1	1	1	30125000	13442000
F5H170;Q8WW22-3;Q8WW22;Q8WW22-2	DnaJ homolog subfamily A member 4	DNAJA4	>tr|F5H170|F5H170_HUMAN DnaJ homolog subfamily A member 4 OS=Homo sapiens GN=DNAJA4 PE=2 SV=1;>sp|Q8WW22-3|DNJA4_HUMAN Isoform 3 of DnaJ homolog subfamily A member 4 OS=Homo sapiens GN=DNAJA4;>sp|Q8WW22|DNJA4_HUMAN DnaJ homolog subfamily A member 4 OS=Homo	1	1	1	1	1	1	1	1	1	1	1	17509000	1	1	37373000	1	1	1	1	1	57394000	62492000	1	1
F5H1E5;B7Z2Y2;Q14746-2;Q14746;B7Z7N2	Conserved oligomeric Golgi complex subunit 2	COG2	>tr|F5H1E5|F5H1E5_HUMAN Conserved oligomeric Golgi complex subunit 2 OS=Homo sapiens GN=COG2 PE=2 SV=1;>tr|B7Z2Y2|B7Z2Y2_HUMAN Conserved oligomeric Golgi complex subunit 2 OS=Homo sapiens GN=COG2 PE=2 SV=1;>sp|Q14746-2|COG2_HUMAN Isoform 2 of Conserved oli	1	1	1	1	1	1	1	1	1	1	1	1	1	12613000	6704700	7130300	6414900	6251300	1	1	5293700	1	1	1
F5H2Q7;Q9C0E8-2;Q9C0E8;Q9C0E8-4;Q9C0E8-3;C9JL94	Protein lunapark	KIAA1715;LNP	>tr|F5H2Q7|F5H2Q7_HUMAN Protein lunapark OS=Homo sapiens GN=KIAA1715 PE=2 SV=1;>sp|Q9C0E8-2|LNP_HUMAN Isoform 2 of Protein lunapark OS=Homo sapiens GN=LNP;>sp|Q9C0E8|LNP_HUMAN Protein lunapark OS=Homo sapiens GN=LNP PE=1 SV=2;>sp|Q9C0E8-4|LNP_HUMAN Isoform	1422900	1	42159000	40531000	1166100	1	8141200	52439000	4930500	4787400	4407000	6320100	13658000	43724000	25939000	43392000	10835000	24293000	7371300	23473000	9123500	12322000	9231400	12581000
F5H2U1;P35520;P35520-2;H7C2H4;H7C1W6;H7C2W0	Cystathionine beta-synthase	CBS	>tr|F5H2U1|F5H2U1_HUMAN Cystathionine beta-synthase OS=Homo sapiens GN=CBS PE=2 SV=1;>sp|P35520|CBS_HUMAN Cystathionine beta-synthase OS=Homo sapiens GN=CBS PE=1 SV=2;>sp|P35520-2|CBS_HUMAN Isoform 2 of Cystathionine beta-synthase OS=Homo sapiens GN=CBS;>t	13551000	10078000	6231700	8383300	10083000	9218900	9933500	10777000	9083100	11497000	10122000	9846900	6933300	6984500	4737400	3994900	8571000	9525700	7908700	5883700	7465500	2226100	6361300	7557800
F5H2U8;P52926;F5H2A4;P52926-3;P52926-6;P52926-4;P52926-5;P52926-2;F5H6H0	High mobility group protein HMGI-C	HMGA2	>tr|F5H2U8|F5H2U8_HUMAN High mobility group protein HMGI-C OS=Homo sapiens GN=HMGA2 PE=2 SV=1;>sp|P52926|HMGA2_HUMAN High mobility group protein HMGI-C OS=Homo sapiens GN=HMGA2 PE=1 SV=1;>tr|F5H2A4|F5H2A4_HUMAN High mobility group protein HMGI-C OS=Homo sa	3202800	2674900	1656200	1	1	1	2672200	2881500	5527400	4491800	3326800	3361600	1	1694900	1	1	1	1	51941000	25638000	3398100	1	1778600	1510700
F5H3B1;F5H1R6;Q92934	Bcl2 antagonist of cell death	BAD	>tr|F5H3B1|F5H3B1_HUMAN Bcl2 antagonist of cell death (Fragment) OS=Homo sapiens GN=BAD PE=2 SV=1;>tr|F5H1R6|F5H1R6_HUMAN Bcl2 antagonist of cell death (Fragment) OS=Homo sapiens GN=BAD PE=2 SV=1;>sp|Q92934|BAD_HUMAN Bcl2 antagonist of cell death OS=Homo s	1	1	1697100000	561930000	1	1	1	1	1	1	1	1	1	1	1	1	1	1	554410	1	1	1	1	1
F5H4V9;Q16342-3;Q16342;F5GYS7;Q16342-2;J3QK82;E9PCU7;F5GWT2	Programmed cell death protein 2	PDCD2	>tr|F5H4V9|F5H4V9_HUMAN Programmed cell death protein 2 OS=Homo sapiens GN=PDCD2 PE=2 SV=1;>sp|Q16342-3|PDCD2_HUMAN Isoform 3 of Programmed cell death protein 2 OS=Homo sapiens GN=PDCD2;>sp|Q16342|PDCD2_HUMAN Programmed cell death protein 2 OS=Homo sapiens	1	1	1	1	1	1	6744200	5864700	6515200	6500300	5125500	7244300	9158300	9092200	7948900	7475200	5904900	9158400	11804000	10229000	10085000	9279100	13804000	14218000
F5H5C2;Q8WUM0	Nuclear pore complex protein Nup133	NUP133	>tr|F5H5C2|F5H5C2_HUMAN Nuclear pore complex protein Nup133 OS=Homo sapiens GN=NUP133 PE=2 SV=1;>sp|Q8WUM0|NU133_HUMAN Nuclear pore complex protein Nup133 OS=Homo sapiens GN=NUP133 PE=1 SV=2	1	1	1	1	4018300	4277800	10464000	11463000	9246200	11798000	14596000	10193000	18732000	12316000	1	1	7182400	1	10076000	11841000	1	1	7245600	1
F5H5V6;F5H6S1;O15550;F8W8R6;H0Y6I7;H0Y5J3;F5H8B4;O14607-2;O14607-5;O14607-3;O14607;O14607-4;F5GWV3;F5H3N7	Lysine-specific demethylase 6A;Histone demethylase UTY	KDM6A;UTY	>tr|F5H5V6|F5H5V6_HUMAN Lysine-specific demethylase 6A OS=Homo sapiens GN=KDM6A PE=2 SV=1;>tr|F5H6S1|F5H6S1_HUMAN Lysine-specific demethylase 6A OS=Homo sapiens GN=KDM6A PE=2 SV=1;>sp|O15550|KDM6A_HUMAN Lysine-specific demethylase 6A OS=Homo sapiens GN=KDM	4819000	1	1	1	40446000	49441000	4208000	4534500	1	5080000	4690200	3878800	3198500	3247200	1	1	2039100	1	21143000	5192700	1	1	2887900	2324300
F5H698;B4DER1;Q9P2J5;B4DJ10	Leucine--tRNA ligase, cytoplasmic	LARS	>tr|F5H698|F5H698_HUMAN Leucine--tRNA ligase, cytoplasmic OS=Homo sapiens GN=LARS PE=2 SV=1;>tr|B4DER1|B4DER1_HUMAN Leucine--tRNA ligase, cytoplasmic OS=Homo sapiens GN=LARS PE=2 SV=1;>sp|Q9P2J5|SYLC_HUMAN Leucine--tRNA ligase, cytoplasmic OS=Homo sapiens	17872000	23040000	44217000	54397000	24198000	22428000	31942000	31189000	26720000	26050000	24208000	22890000	55622000	33767000	34424000	37841000	53105000	38738000	37952000	36551000	53565000	46716000	31914000	29337000
F5H7D9;B4DKZ7;Q8WXI9;Q86YP4-2;Q86YP4;Q86YP4-3	Transcriptional repressor p66-beta;Transcriptional repressor p66-alpha	GATAD2A;GATAD2B	>tr|F5H7D9|F5H7D9_HUMAN Transcriptional repressor p66-alpha OS=Homo sapiens GN=GATAD2A PE=2 SV=1;>tr|B4DKZ7|B4DKZ7_HUMAN Transcriptional repressor p66-alpha OS=Homo sapiens GN=GATAD2A PE=2 SV=1;>sp|Q8WXI9|P66B_HUMAN Transcriptional repressor p66-beta OS=Ho	1	13474000	1	1	12587000	10069000	9369600	7727500	10622000	7698700	6896700	7495000	3695700	3117600	1	1	1	1	6194600	5296300	1	1	6184700	1
F5H7E2;P42285	Superkiller viralicidic activity 2-like 2	SKIV2L2	>tr|F5H7E2|F5H7E2_HUMAN Superkiller viralicidic activity 2-like 2 OS=Homo sapiens GN=SKIV2L2 PE=2 SV=1;>sp|P42285|SK2L2_HUMAN Superkiller viralicidic activity 2-like 2 OS=Homo sapiens GN=SKIV2L2 PE=1 SV=3	1	1	2688600	7234100	1	9149200	4618100	5093700	9494600	6429200	10828000	6891000	4753400	7796300	4303200	4036200	4083300	3583300	6298100	6138500	6982100	5533600	6329200	5421300
F5H7M3;H0YDD4;P10515;E9PEJ4	Dihydrolipoyllysine-residue acetyltransferase component of pyruvate dehydrogenase complex, mitochondrial	DLAT	>tr|F5H7M3|F5H7M3_HUMAN Dihydrolipoyllysine-residue acetyltransferase component of pyruvate dehydrogenase complex, mitochondrial OS=Homo sapiens GN=DLAT PE=2 SV=1;>tr|H0YDD4|H0YDD4_HUMAN Dihydrolipoyllysine-residue acetyltransferase component of pyruvate d	35553000	37691000	13067000	12554000	34395000	36280000	19977000	17568000	21976000	18008000	16808000	26561000	11308000	12970000	8111600	7894200	14093000	14925000	45199000	22386000	10427000	12541000	15309000	15975000
F5H7V7;P51970	NADH dehydrogenase [ubiquinone] 1 alpha subcomplex subunit 8	NDUFA8	>tr|F5H7V7|F5H7V7_HUMAN NADH dehydrogenase [ubiquinone] 1 alpha subcomplex subunit 8 OS=Homo sapiens GN=NDUFA8 PE=2 SV=1;>sp|P51970|NDUA8_HUMAN NADH dehydrogenase [ubiquinone] 1 alpha subcomplex subunit 8 OS=Homo sapiens GN=NDUFA8 PE=1 SV=3	6279000	6523200	39928000	16463000	8830900	10909000	16067000	18600000	14158000	16074000	12939000	14594000	26259000	20490000	26625000	21579000	31263000	31849000	25340000	21622000	23041000	22768000	26050000	20677000
F5H897;Q12931;I3L0K7;I3L239;I3L253	Heat shock protein 75 kDa, mitochondrial	TRAP1	>tr|F5H897|F5H897_HUMAN Heat shock protein 75 kDa, mitochondrial OS=Homo sapiens GN=TRAP1 PE=2 SV=1;>sp|Q12931|TRAP1_HUMAN Heat shock protein 75 kDa, mitochondrial OS=Homo sapiens GN=TRAP1 PE=1 SV=3;>tr|I3L0K7|I3L0K7_HUMAN Heat shock protein 75 kDa, mitoch	37275000	50952000	13067000	26387000	98158000	89689000	119040000	99889000	114980000	122010000	107920000	104040000	103580000	83883000	77263000	47519000	141380000	118360000	52401000	61444000	67585000	68920000	81207000	78528000
F5H8L7;E9PHB3;Q8TF68-3;F8W6Q3;Q8TF68-2;Q8TF68	Zinc finger protein 384	ZNF384	>tr|F5H8L7|F5H8L7_HUMAN Zinc finger protein 384 (Fragment) OS=Homo sapiens GN=ZNF384 PE=2 SV=1;>tr|E9PHB3|E9PHB3_HUMAN Zinc finger protein 384 (Fragment) OS=Homo sapiens GN=ZNF384 PE=2 SV=3;>sp|Q8TF68-3|ZN384_HUMAN Isoform 3 of Zinc finger protein 384 OS=H	2662600	2450600	1	1	2056600	1	1	1	3337300	3142300	4020900	3741700	1	2457600	1898500	1	1	1850700	19188000	3972100	2096100	1	2955500	1
F6S6P2;P46379-4;P46379-5;P46379-2;P46379;P46379-3	Large proline-rich protein BAG6	BAG6	>tr|F6S6P2|F6S6P2_HUMAN Large proline-rich protein BAG6 (Fragment) OS=Homo sapiens GN=BAG6 PE=2 SV=1;>sp|P46379-4|BAG6_HUMAN Isoform 4 of Large proline-rich protein BAG6 OS=Homo sapiens GN=BAG6;>sp|P46379-5|BAG6_HUMAN Isoform 5 of Large proline-rich protei	1	1	6321700	1	2955700	2461100	6984200	5479300	7552700	8879600	7951900	11701000	14539000	10488000	1	1	19957000	11525000	6345600	5474500	1	1	12379000	10056000
F6SS63;Q8N5C8-2;Q8N5C8;A6ND79	TGF-beta-activated kinase 1 and MAP3K7-binding protein 3	TAB3	>tr|F6SS63|F6SS63_HUMAN TGF-beta-activated kinase 1 and MAP3K7-binding protein 3 OS=Homo sapiens GN=TAB3 PE=2 SV=1;>sp|Q8N5C8-2|TAB3_HUMAN Isoform 2 of TGF-beta-activated kinase 1 and MAP3K7-binding protein 3 OS=Homo sapiens GN=TAB3;>sp|Q8N5C8|TAB3_HUMAN T	53439000	49482000	1	1	33891000	31623000	7880300	6098700	7330400	18052000	1	4064100	4640600	5297600	2470200	2292000	3812100	3980200	3765800	5134300	8063600	8675700	5513900	9831500
F8VP89		EIF4B	>tr|F8VP89|F8VP89_HUMAN Eukaryotic translation initiation factor 4B (Fragment) OS=Homo sapiens GN=EIF4B PE=2 SV=1	10945000	12070000	1	1	9333100	9624800	4447000	1	4414600	4686500	3478300	4870800	1107800	1	1	1	1	1	2750700	1	1	1	1	1
F8VPD4;P27708;H7C2E4;H7C3Z5;H7BZB3	CAD protein;Glutamine-dependent carbamoyl-phosphate synthase;Aspartate carbamoyltransferase;Dihydroorotase	CAD	>tr|F8VPD4|F8VPD4_HUMAN CAD protein OS=Homo sapiens GN=CAD PE=2 SV=1;>sp|P27708|PYR1_HUMAN CAD protein OS=Homo sapiens GN=CAD PE=1 SV=3	28729000	39322000	45669000	53714000	22606000	24871000	22260000	33416000	31913000	38350000	44133000	46676000	26325000	37585000	28698000	38706000	44369000	14874000	36379000	24710000	111730000	105900000	16691000	51622000
F8VUY8;Q96QD8	Sodium-coupled neutral amino acid transporter 2	SLC38A2	>tr|F8VUY8|F8VUY8_HUMAN Sodium-coupled neutral amino acid transporter 2 OS=Homo sapiens GN=SLC38A2 PE=2 SV=1;>sp|Q96QD8|S38A2_HUMAN Sodium-coupled neutral amino acid transporter 2 OS=Homo sapiens GN=SLC38A2 PE=1 SV=2	4619600	1	1	1	1	1	1	1	1	1	1	1	1	11572000	1	16933000	7928300	7217900	1	9645900	8864200	1	1	1
F8VWA9;F5H5T2;F8VXJ0;F5GZZ6;Q5I7T1;Q5BKT4	Putative Dol-P-Glc:Glc(2)Man(9)GlcNAc(2)-PP-Dol alpha-1,2-glucosyltransferase;Dol-P-Glc:Glc(2)Man(9)GlcNAc(2)-PP-Dol alpha-1,2-glucosyltransferase	ALG10B;ALG10	>tr|F8VWA9|F8VWA9_HUMAN Putative Dol-P-Glc:Glc(2)Man(9)GlcNAc(2)-PP-Dol alpha-1,2-glucosyltransferase OS=Homo sapiens GN=ALG10B PE=4 SV=1;>tr|F5H5T2|F5H5T2_HUMAN Dol-P-Glc:Glc(2)Man(9)GlcNAc(2)-PP-Dol alpha-1,2-glucosyltransferase OS=Homo sapiens GN=ALG10	1	1	1	1	1	1	2825100	1	1	1437000	1970300	1486700	5861600	4664100	1	1	5428600	11224000	4779600	3442800	1	1	3906100	3668800
F8VY35;P55209-2;F5H4R6;H0YIV4;P55209;F8W020;F8W0J6;H0YH88;H0YHC3;F8W543;F8VXI6;F8VUX1;F8VVB5	Nucleosome assembly protein 1-like 1	NAP1L1	>tr|F8VY35|F8VY35_HUMAN Nucleosome assembly protein 1-like 1 (Fragment) OS=Homo sapiens GN=NAP1L1 PE=2 SV=1;>sp|P55209-2|NP1L1_HUMAN Isoform 2 of Nucleosome assembly protein 1-like 1 OS=Homo sapiens GN=NAP1L1;>tr|F5H4R6|F5H4R6_HUMAN Nucleosome assembly pro	453470000	410140000	491460000	459560000	468820000	457590000	647380000	721800000	656790000	688130000	609270000	584560000	851060000	840480000	1008200000	870610000	890950000	863420000	697150000	809840000	1102300000	1098900000	1007500000	906140000
F8VYE8;P36873;P36873-2;F8VR82;F8W0W8	Serine/threonine-protein phosphatase;Serine/threonine-protein phosphatase PP1-gamma catalytic subunit	PPP1CC	>tr|F8VYE8|F8VYE8_HUMAN Serine/threonine-protein phosphatase OS=Homo sapiens GN=PPP1CC PE=2 SV=1;>sp|P36873|PP1G_HUMAN Serine/threonine-protein phosphatase PP1-gamma catalytic subunit OS=Homo sapiens GN=PPP1CC PE=1 SV=1;>sp|P36873-2|PP1G_HUMAN Isoform Gamm	15322000	17344000	24892000	1	18143000	19578000	28564000	44622000	26373000	22852000	17856000	18135000	1	19696000	23468000	21579000	27700000	39420000	23533000	17353000	24554000	24516000	16283000	15491000
F8VZA2;Q6P1Q0;Q6P1Q0-7;F8W1Z2;Q6P1Q0-2;H0YIV5;Q6P1Q0-4;F8VP71;F8VVQ3;Q6P1Q0-5;F8VR33;H0YHF4;F8VQE7;F8VTR1;F8VS60;F8W0R0;Q6P1Q0-6;F8VXQ4;F8WCD9;F8W6J0;Q6P1Q0-3;F8VPY5	LETM1 domain-containing protein 1	LETMD1	>tr|F8VZA2|F8VZA2_HUMAN LETM1 domain-containing protein 1 (Fragment) OS=Homo sapiens GN=LETMD1 PE=2 SV=2;>sp|Q6P1Q0|LTMD1_HUMAN LETM1 domain-containing protein 1 OS=Homo sapiens GN=LETMD1 PE=1 SV=1;>sp|Q6P1Q0-7|LTMD1_HUMAN Isoform 7 of LETM1 domain-contain	1	10714000	1	1	1	1	12466000	11398000	12802000	9507000	28796000	23157000	33234000	44461000	35011000	23932000	23117000	13178000	39824000	55585000	61658000	48228000	57467000	47491000
F8VZJ2;F8W0W4;H0YHX9;Q13765;E9PAV3-2;E9PAV3;F8W1N5;F8VNW4;F8VZ58;Q9BZK3	Nascent polypeptide-associated complex subunit alpha	NACA	>tr|F8VZJ2|F8VZJ2_HUMAN Nascent polypeptide-associated complex subunit alpha, muscle-specific form OS=Homo sapiens GN=NACA PE=2 SV=1;>tr|F8W0W4|F8W0W4_HUMAN Nascent polypeptide-associated complex subunit alpha, muscle-specific form (Fragment) OS=Homo sapie	42538000	34493000	154360000	161380000	59083000	51021000	62592000	59775000	90022000	103560000	55098000	61625000	56258000	64472000	99965000	95874000	129680000	108080000	43537000	60369000	87234000	79928000	87864000	86230000
F8W1R7;P60660-2;P60660;J3KND3;G8JLA2;G3V1V0;B7Z6Z4;G3V1Y7;F8VPF3;F8VZU9;F8W180;H0YI43;F8VXL3;F8W1I5;P14649	Myosin light polypeptide 6	MYL6	>tr|F8W1R7|F8W1R7_HUMAN Myosin light polypeptide 6 OS=Homo sapiens GN=MYL6 PE=2 SV=1;>sp|P60660-2|MYL6_HUMAN Isoform Smooth muscle of Myosin light polypeptide 6 OS=Homo sapiens GN=MYL6;>sp|P60660|MYL6_HUMAN Myosin light polypeptide 6 OS=Homo sapiens GN=MYL	69811000	64016000	173190000	178140000	77887000	78623000	93065000	83845000	119290000	116010000	84729000	90085000	56331000	55012000	74754000	84419000	65118000	63894000	307000000	288770000	62486000	69104000	85937000	88008000
F8W1Z6;Q7Z3U7-2;F8VWA6;Q7Z3U7-5;Q7Z3U7-4;Q7Z3U7;F8VZV1;Q7Z3U7-3;F8VQS2;F8VZV6;F8VZQ3	Protein MON2 homolog	MON2	>tr|F8W1Z6|F8W1Z6_HUMAN Protein MON2 homolog OS=Homo sapiens GN=MON2 PE=2 SV=1;>sp|Q7Z3U7-2|MON2_HUMAN Isoform 2 of Protein MON2 homolog OS=Homo sapiens GN=MON2;>tr|F8VWA6|F8VWA6_HUMAN Protein MON2 homolog OS=Homo sapiens GN=MON2 PE=2 SV=1;>sp|Q7Z3U7-5|MON	1	1	1	1	2587500	11465000	22784000	19087000	9627900	6546800	28287000	16588000	98009000	129750000	165030000	115340000	110160000	121040000	31656000	34045000	68291000	55739000	51246000	52759000
F8W651;P61923;F8VWL5;F8VVA7;F8VXB1;F8VUC5;F8W156;F8VXR1;F8VS17;F8VYZ4;F8VYK5;P61923-2;B4DDX8	Coatomer subunit zeta-1	COPZ1	>tr|F8W651|F8W651_HUMAN Coatomer subunit zeta-1 OS=Homo sapiens GN=COPZ1 PE=2 SV=1;>sp|P61923|COPZ1_HUMAN Coatomer subunit zeta-1 OS=Homo sapiens GN=COPZ1 PE=1 SV=1;>tr|F8VWL5|F8VWL5_HUMAN Coatomer subunit zeta-1 OS=Homo sapiens GN=COPZ1 PE=2 SV=1;>tr|F8VV	1	1	10364000	8688000	13914000	7638200	1	4214900	15139000	8079000	3848000	4768300	9656900	4146900	10421000	7357700	6371200	1	3042900	1	6365200	7308700	4298100	10791000
F8W6I7;P09651-2;P09651;P09651-3;F8VZ49;Q32P51;F8VTQ5;H0YH80;F8VYN5;F8W646	Heterogeneous nuclear ribonucleoprotein A1;Heterogeneous nuclear ribonucleoprotein A1-like 2	HNRNPA1;HNRNPA1L2	>tr|F8W6I7|F8W6I7_HUMAN Heterogeneous nuclear ribonucleoprotein A1 OS=Homo sapiens GN=HNRNPA1 PE=4 SV=2;>sp|P09651-2|ROA1_HUMAN Isoform A1-A of Heterogeneous nuclear ribonucleoprotein A1 OS=Homo sapiens GN=HNRNPA1;>sp|P09651|ROA1_HUMAN Heterogeneous nuclea	1892000000	1894600000	943970000	1017600000	1786400000	1542800000	1181000000	1082600000	1021700000	1153400000	1066300000	1079900000	1042200000	938430000	1051300000	1014600000	1156900000	864220000	996650000	1164000000	1130500000	901370000	921420000	831130000
F8W787;F8WD96;C9JH19;H7C469;P07339	Cathepsin D;Cathepsin D light chain;Cathepsin D heavy chain	CTSD	>tr|F8W787|F8W787_HUMAN Cathepsin D light chain (Fragment) OS=Homo sapiens GN=CTSD PE=2 SV=1;>tr|F8WD96|F8WD96_HUMAN Cathepsin D light chain OS=Homo sapiens GN=CTSD PE=2 SV=1;>tr|C9JH19|C9JH19_HUMAN Cathepsin D light chain (Fragment) OS=Homo sapiens GN=CTS	1475400	1	1	7000800	3262400	3925700	3782900	1	5866900	8296900	22365000	16036000	1	1	1	1	1	1	1	1	2376700	1	1	1
F8W7C6;X1WI28;P27635;H7C123;H7C2C5;Q96L21;B8A6G2;A6QRI9;H7C2U2	60S ribosomal protein L10	RPL10	>tr|F8W7C6|F8W7C6_HUMAN 60S ribosomal protein L10 OS=Homo sapiens GN=RPL10 PE=2 SV=1;>tr|X1WI28|X1WI28_HUMAN 60S ribosomal protein L10 (Fragment) OS=Homo sapiens GN=RPL10 PE=4 SV=1;>sp|P27635|RL10_HUMAN 60S ribosomal protein L10 OS=Homo sapiens GN=RPL10 PE	692490000	579890000	312030000	313440000	609420000	559050000	741590000	681210000	588760000	555140000	416260000	493260000	654680000	676540000	771940000	582340000	657000000	614940000	420760000	574920000	747790000	764250000	645510000	607510000
F8W7P7;O75717-2;O75717	WD repeat and HMG-box DNA-binding protein 1	WDHD1	>tr|F8W7P7|F8W7P7_HUMAN WD repeat and HMG-box DNA-binding protein 1 OS=Homo sapiens GN=WDHD1 PE=2 SV=1;>sp|O75717-2|WDHD1_HUMAN Isoform 2 of WD repeat and HMG-box DNA-binding protein 1 OS=Homo sapiens GN=WDHD1;>sp|O75717|WDHD1_HUMAN WD repeat and HMG-box D	62164000	1	1	1	74673000	75354000	29665000	19846000	27220000	25576000	22079000	22022000	1	1	1	1	1	1	1	1	1	1	1	1
F8W7Q4;Q96A26;E9PH05	Protein FAM162A	FAM162A	>tr|F8W7Q4|F8W7Q4_HUMAN Protein FAM162A OS=Homo sapiens GN=FAM162A PE=2 SV=1;>sp|Q96A26|F162A_HUMAN Protein FAM162A OS=Homo sapiens GN=FAM162A PE=1 SV=2;>tr|E9PH05|E9PH05_HUMAN Protein FAM162A OS=Homo sapiens GN=FAM162A PE=2 SV=1	5590700	4901200	11256000	1	6393600	5817100	1	9436200	9723500	19581000	8743300	6854000	44199000	23226000	40843000	53056000	47373000	48664000	10116000	10308000	45606000	51876000	15486000	24972000
F8W826;E9PAZ1;Q9NSB8-2;Q9NSB8;M0R2T8;Q9NSC5-4;Q9NSC5-3;M0QZN1;Q86YM7-3;H0YNR9;Q86YM7-2;M0R2U7;Q9NSC5-5;Q86YM7;Q9NSC5-2;Q9NSC5	Homer protein homolog 2;Homer protein homolog 3;Homer protein homolog 1	HOMER2;HOMER3;HOMER1	>tr|F8W826|F8W826_HUMAN Homer protein homolog 2 OS=Homo sapiens GN=HOMER2 PE=2 SV=1;>tr|E9PAZ1|E9PAZ1_HUMAN Homer protein homolog 2 OS=Homo sapiens GN=HOMER2 PE=2 SV=1;>sp|Q9NSB8-2|HOME2_HUMAN Isoform 2 of Homer protein homolog 2 OS=Homo sapiens GN=HOMER2;	17684000	1	1	1	16138000	14531000	14504000	12923000	4382200	11691000	3948600	6476000	1820000	1	1	436350	2302300	1	2464700	3879000	1938500	1	4087500	4164000
F8W895;E9PAV9;Q5T3I0;Q5T3I0-3;E9PPY4;F2Z3C6	G patch domain-containing protein 4	GPATCH4	>tr|F8W895|F8W895_HUMAN G patch domain-containing protein 4 (Fragment) OS=Homo sapiens GN=GPATCH4 PE=2 SV=1;>tr|E9PAV9|E9PAV9_HUMAN G patch domain-containing protein 4 OS=Homo sapiens GN=GPATCH4 PE=2 SV=1;>sp|Q5T3I0|GPTC4_HUMAN G patch domain-containing pr	6897600	1	1	1	7756800	5604100	9553800	9530800	5981800	6986000	1	5443700	6219000	7431000	1	1	1	1	6165100	7457700	1	1	7459800	6590100
F8W9B8;O00471;G3V4Z7	Exocyst complex component 5	EXOC5	>tr|F8W9B8|F8W9B8_HUMAN Exocyst complex component 5 OS=Homo sapiens GN=EXOC5 PE=2 SV=1;>sp|O00471|EXOC5_HUMAN Exocyst complex component 5 OS=Homo sapiens GN=EXOC5 PE=1 SV=1	24816000	13617000	1	15314000	8210700	7756900	5635300	8627300	8850500	10138000	8685900	1	24178000	14783000	12934000	13572000	1	14448000	27669000	8498500	1	14016000	12449000	1
F8W9I4;E9PFY5		MLLT4	>tr|F8W9I4|F8W9I4_HUMAN Afadin (Fragment) OS=Homo sapiens GN=MLLT4 PE=2 SV=1;>tr|E9PFY5|E9PFY5_HUMAN Afadin (Fragment) OS=Homo sapiens GN=MLLT4 PE=2 SV=1	3110100	1596800	1	1	1	4592100	11935000	11360000	1845400	6567900	1553000	8137600	1	10397000	8724500	14388000	5961400	8205400	16265000	11884000	11832000	11178000	11659000	10998000
F8WA86;Q15417;B4DFK6;E9PDU6;K7ES69;Q99439-2;B4DDF4;Q99439;B4DUT8	Calponin-3	CNN3	>tr|F8WA86|F8WA86_HUMAN Calponin-3 OS=Homo sapiens GN=CNN3 PE=2 SV=1;>sp|Q15417|CNN3_HUMAN Calponin-3 OS=Homo sapiens GN=CNN3 PE=1 SV=1;>tr|B4DFK6|B4DFK6_HUMAN Calponin-3 OS=Homo sapiens GN=CNN3 PE=2 SV=1;>tr|E9PDU6|E9PDU6_HUMAN Calponin-3 (Fragment) OS=Ho	34611000	31664000	29391000	1	28364000	22558000	28647000	24783000	30943000	33205000	18175000	21613000	11837000	23572000	16741000	11885000	22248000	1	13655000	14629000	14839000	11718000	33645000	30962000
F8WAK8;Q8N3U4;Q8N3U4-2;B1AMT4;Q8WVM7-2;Q8WVM7;B1AMT1;B1AMT2;B1AMT3;Q9UJ98-2;Q68DW7;Q9UJ98-3;Q9UJ98;B1AMT0;C9J3T3;F5H1C4	Cohesin subunit SA-2	STAG2	>tr|F8WAK8|F8WAK8_HUMAN Cohesin subunit SA-2 OS=Homo sapiens GN=STAG2 PE=2 SV=1;>sp|Q8N3U4|STAG2_HUMAN Cohesin subunit SA-2 OS=Homo sapiens GN=STAG2 PE=1 SV=3;>sp|Q8N3U4-2|STAG2_HUMAN Isoform 2 of Cohesin subunit SA-2 OS=Homo sapiens GN=STAG2;>tr|B1AMT4|B1	1	9202600	3199200	1	4043500	2928700	38501000	41434000	6261200	8483700	14020000	47953000	168420000	178690000	198040000	147350000	131590000	165080000	69206000	60503000	49131000	94686000	43612000	9072600
F8WAX7;A8K0M9;Q9Y6D0	Selenoprotein K	SELK	>tr|F8WAX7|F8WAX7_HUMAN Selenoprotein K OS=Homo sapiens GN=SELK PE=2 SV=1;>tr|A8K0M9|A8K0M9_HUMAN Selenoprotein K OS=Homo sapiens GN=SELK PE=4 SV=1;>sp|Q9Y6D0|SELK_HUMAN Selenoprotein K OS=Homo sapiens GN=SELK PE=1 SV=3	2747800	2717500	1862900	1	2287800	2226300	8410200	9238700	3068200	2749600	2905000	3336400	9322300	10676000	1	1	12111000	1	5684200	6412600	1	1	13377000	1
F8WE04;P04792	Heat shock protein beta-1	HSPB1	>tr|F8WE04|F8WE04_HUMAN Heat shock protein beta-1 OS=Homo sapiens GN=HSPB1 PE=2 SV=1;>sp|P04792|HSPB1_HUMAN Heat shock protein beta-1 OS=Homo sapiens GN=HSPB1 PE=1 SV=2	2702900	1	26618000	89692000	3218900	3822600	2745000	3543100	3166700	3237100	37966000	33166000	6975800	3676700	1	1	1	1	3259000	2844700	1	29127000	1	1
F8WE41;P52298-3;P52298	Nuclear cap-binding protein subunit 2	NCBP2	>tr|F8WE41|F8WE41_HUMAN Nuclear cap-binding protein subunit 2 OS=Homo sapiens GN=NCBP2 PE=2 SV=1;>sp|P52298-3|NCBP2_HUMAN Isoform 3 of Nuclear cap-binding protein subunit 2 OS=Homo sapiens GN=NCBP2;>sp|P52298|NCBP2_HUMAN Nuclear cap-binding protein subunit	8068500	11636000	5015900	5389300	20464000	8798600	11763000	7089000	7707000	9326800	1	1	1	1	1	1	3904600	1	1	1	1	1	1	1
G3V167;Q9UGN5-2;Q9UGN5	Poly [ADP-ribose] polymerase 2	PARP2	>tr|G3V167|G3V167_HUMAN Poly (ADP-ribose) polymerase family, member 2, isoform CRA_a OS=Homo sapiens GN=PARP2 PE=4 SV=1;>sp|Q9UGN5-2|PARP2_HUMAN Isoform 2 of Poly [ADP-ribose] polymerase 2 OS=Homo sapiens GN=PARP2;>sp|Q9UGN5|PARP2_HUMAN Poly [ADP-ribose] p	1	1	1	1	1	1	1	1	1790700	1	1	1	1	1	1	1	1	1	2758200	3478800	1	1	1	1
G3V1S6;Q10471	Polypeptide N-acetylgalactosaminyltransferase 2;Polypeptide N-acetylgalactosaminyltransferase 2 soluble form	GALNT2	>tr|G3V1S6|G3V1S6_HUMAN Polypeptide N-acetylgalactosaminyltransferase 2 soluble form OS=Homo sapiens GN=GALNT2 PE=3 SV=1;>sp|Q10471|GALT2_HUMAN Polypeptide N-acetylgalactosaminyltransferase 2 OS=Homo sapiens GN=GALNT2 PE=1 SV=1	4671700	2019200	1	1	1	5140700	7971400	6442800	4011700	3114100	3356400	5854400	7950500	7533000	15527000	7432900	7901400	6788500	6638900	6334800	1	1	7080300	12401000
G3V2P7;G5E9S8;Q07866-8;G3V2E7;Q07866-2;Q07866-3;Q07866;F8W6L3;Q07866-7;G3V3H3;Q07866-5;Q07866-10;Q07866-6;G3V5R9;Q07866-4;Q07866-9;E7EVH7	Kinesin light chain 1	KLC1	>tr|G3V2P7|G3V2P7_HUMAN Kinesin light chain 1 (Fragment) OS=Homo sapiens GN=KLC1 PE=2 SV=1;>tr|G5E9S8|G5E9S8_HUMAN Kinesin light chain 1 OS=Homo sapiens GN=KLC1 PE=2 SV=1;>sp|Q07866-8|KLC1_HUMAN Isoform S of Kinesin light chain 1 OS=Homo sapiens GN=KLC1;>t	2698700	2800300	1	1	2857300	2778500	4540400	5067300	5207100	1	1	3087000	2757500	3490700	2735700	1927400	3615100	2717600	1	4569200	1	1	1	4481800
G3V3G9;Q5TAQ9;V9GY54;Q5TAQ9-2	DDB1- and CUL4-associated factor 8	DCAF8	>tr|G3V3G9|G3V3G9_HUMAN DDB1- and CUL4-associated factor 8 OS=Homo sapiens GN=DCAF8 PE=4 SV=1;>sp|Q5TAQ9|DCAF8_HUMAN DDB1- and CUL4-associated factor 8 OS=Homo sapiens GN=DCAF8 PE=1 SV=1;>tr|V9GY54|V9GY54_HUMAN DDB1- and CUL4-associated factor 8 OS=Homo sa	1	1	1	1	4275400	7217300	17268000	13547000	11504000	9568900	14011000	16431000	32406000	24330000	24016000	25157000	16580000	24425000	19570000	10168000	30811000	17819000	24462000	12672000
G3V3U4;G3V3I1;G3V295;P60900-2;P60900;G3V5Z7	Proteasome subunit alpha type;Proteasome subunit alpha type-6	PSMA6	>tr|G3V3U4|G3V3U4_HUMAN Proteasome subunit alpha type OS=Homo sapiens GN=PSMA6 PE=3 SV=1;>tr|G3V3I1|G3V3I1_HUMAN Proteasome subunit alpha type OS=Homo sapiens GN=PSMA6 PE=3 SV=1;>tr|G3V295|G3V295_HUMAN Proteasome subunit alpha type OS=Homo sapiens GN=PSMA6	6021200	5149700	11443000	11784000	1	3529200	4398100	4490900	4809000	4783400	4769000	5305200	1723900	1964100	1	2689800	3561500	3658000	3298500	3031900	1925900	1	3298300	3242500
G3V4F7;P61011-2;P61011	Signal recognition particle 54 kDa protein	SRP54	>tr|G3V4F7|G3V4F7_HUMAN Signal recognition particle 54 kDa protein OS=Homo sapiens GN=SRP54 PE=2 SV=1;>sp|P61011-2|SRP54_HUMAN Isoform 2 of Signal recognition particle 54 kDa protein OS=Homo sapiens GN=SRP54;>sp|P61011|SRP54_HUMAN Signal recognition partic	87181000	3320800000	1	1	65073000	2036300000	61283000	69599000	71179000	77324000	298600000	3653100000	71270000	527320000	164630000	69427000	319140000	142600000	102290000	306280000	65926000	254790000	112650000	129830000
G3V4W0;B4DY08;G3V4C1;P07910-2;G3V2Q1;P07910;G3V576;P07910-4;G3V555;G3V575;P07910-3;O60812;G3V5X6;G3V3K6;G3V251;B4DSU6;G3V5V7;G3V2D6;G3V4M8;G3V2H6	Heterogeneous nuclear ribonucleoproteins C1/C2;Heterogeneous nuclear ribonucleoprotein C-like 1	HNRNPC;HNRNPCL1	>tr|G3V4W0|G3V4W0_HUMAN Heterogeneous nuclear ribonucleoproteins C1/C2 (Fragment) OS=Homo sapiens GN=HNRNPC PE=2 SV=1;>tr|B4DY08|B4DY08_HUMAN Heterogeneous nuclear ribonucleoproteins C1/C2 OS=Homo sapiens GN=HNRNPC PE=2 SV=1;>tr|G3V4C1|G3V4C1_HUMAN Heterog	324400000	395880000	279760000	285210000	384860000	370320000	207940000	226120000	191790000	197160000	310060000	269310000	167760000	168470000	199970000	160290000	152280000	174810000	347430000	402000000	238830000	277020000	206230000	195070000
G3V529;Q9GZR7;F5GYL3;Q9GZR7-2	ATP-dependent RNA helicase DDX24	DDX24	>tr|G3V529|G3V529_HUMAN ATP-dependent RNA helicase DDX24 OS=Homo sapiens GN=DDX24 PE=2 SV=1;>sp|Q9GZR7|DDX24_HUMAN ATP-dependent RNA helicase DDX24 OS=Homo sapiens GN=DDX24 PE=1 SV=1;>tr|F5GYL3|F5GYL3_HUMAN ATP-dependent RNA helicase DDX24 OS=Homo sapiens	1	4010700	1	1	1	2390700	7179400	13012000	5402800	5235000	5643500	5917700	6402100	7908700	6329000	9601800	5218200	6438000	17146000	8984300	6788800	6701400	6635400	7378300
G3V5I6;Q6PJT7-4;Q6PJT7-3;G3V256;H0YJA2;Q6PJT7-5;Q6PJT7-9;Q6PJT7-2;Q6PJT7;H0YJ87;G3V3Y4	Zinc finger CCCH domain-containing protein 14	ZC3H14	>tr|G3V5I6|G3V5I6_HUMAN Zinc finger CCCH domain-containing protein 14 OS=Homo sapiens GN=ZC3H14 PE=2 SV=1;>sp|Q6PJT7-4|ZC3HE_HUMAN Isoform 4 of Zinc finger CCCH domain-containing protein 14 OS=Homo sapiens GN=ZC3H14;>sp|Q6PJT7-3|ZC3HE_HUMAN Isoform 3 of Zi	11328000	6212900	1	3684500	10997000	9499900	5122300	3653100	6104900	3505200	2709700	2687800	2948300	6390800	1	4378200	3854600	4127800	5609700	6188900	5025700	1	7077800	5834700
G3V5M0;G3V359;G3V3C7;G3V3M6;P27695	DNA-(apurinic or apyrimidinic site) lyase;DNA-(apurinic or apyrimidinic site) lyase, mitochondrial	APEX1	>tr|G3V5M0|G3V5M0_HUMAN DNA-(apurinic or apyrimidinic site) lyase (Fragment) OS=Homo sapiens GN=APEX1 PE=2 SV=1;>tr|G3V359|G3V359_HUMAN DNA-(apurinic or apyrimidinic site) lyase (Fragment) OS=Homo sapiens GN=APEX1 PE=2 SV=1;>tr|G3V3C7|G3V3C7_HUMAN DNA-(apu	3333200	4135100	1	1	1	1	6086800	1	1	9284000	5962600	7804400	2977300	4339100	1	1	7042200	6866600	3282500	1	1	1	1	1
G3V5X4;Q8WXH0;Q8WXH0-2;Q8WXH0-4;Q8WXH0-3;Q8WXH0-7	Nesprin-2	SYNE2	>tr|G3V5X4|G3V5X4_HUMAN Nesprin-2 OS=Homo sapiens GN=SYNE2 PE=2 SV=1;>sp|Q8WXH0|SYNE2_HUMAN Nesprin-2 OS=Homo sapiens GN=SYNE2 PE=1 SV=3;>sp|Q8WXH0-2|SYNE2_HUMAN Isoform 2 of Nesprin-2 OS=Homo sapiens GN=SYNE2	14649000	12151000	37618000	36277000	28742000	1	30968000	30729000	39744000	48109000	30888000	24667000	20340000	24741000	26241000	19866000	24192000	28382000	42229000	52427000	22931000	28880000	30931000	28738000
G3XAI9;Q5BKY9;Q5BKY9-2;Q8N9E0	Protein FAM133B;Protein FAM133A	FAM133B;FAM133A	>tr|G3XAI9|G3XAI9_HUMAN Protein FAM133B OS=Homo sapiens GN=FAM133B PE=4 SV=1;>sp|Q5BKY9|F133B_HUMAN Protein FAM133B OS=Homo sapiens GN=FAM133B PE=1 SV=1;>sp|Q5BKY9-2|F133B_HUMAN Isoform 2 of Protein FAM133B OS=Homo sapiens GN=FAM133B;>sp|Q8N9E0|F133A_HUMAN	70208000	62934000	5314500	14340000	43597000	41874000	33824000	30493000	21491000	20176000	24921000	23867000	26509000	21708000	13586000	9806700	13682000	13313000	34938000	25838000	80087000	12354000	20943000	19805000
G3XAN4;B4E0K2;Q15629	Translocating chain-associated membrane protein 1	TRAM1	>tr|G3XAN4|G3XAN4_HUMAN Translocating chain-associated membrane protein 1 OS=Homo sapiens GN=TRAM1 PE=4 SV=1;>tr|B4E0K2|B4E0K2_HUMAN Translocating chain-associated membrane protein 1 OS=Homo sapiens GN=TRAM1 PE=2 SV=1;>sp|Q15629|TRAM1_HUMAN Translocating c	47644000	1	1	1	1	1	114380000	44688000	109020000	49409000	94501000	111300000	147500000	229280000	194230000	257980000	50155000	109880000	326230000	157680000	85898000	127390000	88006000	207680000
G5E9C8;Q07889;Q07890-2;Q07890;B4DXG2;C9K0N6	Son of sevenless homolog 1	SOS1	>tr|G5E9C8|G5E9C8_HUMAN Son of sevenless homolog 1 OS=Homo sapiens GN=SOS1 PE=4 SV=1;>sp|Q07889|SOS1_HUMAN Son of sevenless homolog 1 OS=Homo sapiens GN=SOS1 PE=1 SV=1	1	1	7657400	11024000	1	1	9588700	6745300	7374600	2612700	2893400	2596200	277930000	240170000	215840000	270680000	122950000	117600000	77616000	49031000	58735000	19910000	68033000	61917000
G5E9R5;P24666-4;P24666;F2Z2Q9;D3YTI2;P24666-3;P24666-2	Low molecular weight phosphotyrosine protein phosphatase	ACP1	>tr|G5E9R5|G5E9R5_HUMAN Acid phosphatase 1, soluble, isoform CRA_d OS=Homo sapiens GN=ACP1 PE=4 SV=1;>sp|P24666-4|PPAC_HUMAN Isoform 4 of Low molecular weight phosphotyrosine protein phosphatase OS=Homo sapiens GN=ACP1;>sp|P24666|PPAC_HUMAN Low molecular w	8451100	9491700	7833500	7617400	8160900	8811600	7994000	8433700	12666000	11132000	5003800	4961500	5686200	5318800	1	1	9445300	5027300	6826900	4820000	1	1	5916300	5799500
G5E9W7;G5E9V5;P82650;H7C5F2;Q9H3I1;H7C5H3;H7C5L9;C9J5D8	28S ribosomal protein S22, mitochondrial	MRPS22	>tr|G5E9W7|G5E9W7_HUMAN 28S ribosomal protein S22, mitochondrial OS=Homo sapiens GN=MRPS22 PE=4 SV=1;>tr|G5E9V5|G5E9V5_HUMAN 28S ribosomal protein S22, mitochondrial OS=Homo sapiens GN=MRPS22 PE=4 SV=1;>sp|P82650|RT22_HUMAN 28S ribosomal protein S22, mitoc	35774000	31984000	18858000	18790000	25128000	37773000	28368000	35086000	23291000	23437000	33658000	23585000	18805000	32261000	13053000	13882000	17034000	5080300	27298000	15411000	22248000	24689000	13594000	27797000
G5EA52;P30101	Protein disulfide-isomerase A3	PDIA3	>tr|G5EA52|G5EA52_HUMAN Protein disulfide isomerase family A, member 3, isoform CRA_b OS=Homo sapiens GN=PDIA3 PE=3 SV=1;>sp|P30101|PDIA3_HUMAN Protein disulfide-isomerase A3 OS=Homo sapiens GN=PDIA3 PE=1 SV=4	24466000	34080000	233110000	253320000	62480000	55068000	53059000	53848000	85168000	78386000	62002000	63119000	42205000	34147000	19780000	19652000	86067000	73039000	27417000	22252000	1	13586000	37702000	37057000
H0Y4R1;P12268;E7ETK5;C9K0R9	Inosine-5-monophosphate dehydrogenase 2	IMPDH2	>tr|H0Y4R1|H0Y4R1_HUMAN Inosine-5-monophosphate dehydrogenase 2 (Fragment) OS=Homo sapiens GN=IMPDH2 PE=3 SV=1;>sp|P12268|IMDH2_HUMAN Inosine-5-monophosphate dehydrogenase 2 OS=Homo sapiens GN=IMPDH2 PE=1 SV=2	305540000	368740000	249720000	302760000	354280000	333290000	312720000	320070000	400340000	411860000	217590000	212890000	133240000	134340000	111870000	125750000	225840000	190380000	612390000	803330000	132290000	98390000	296550000	311410000
H0Y8D1;Q8NHM4;P07478;P07477;CON__P07477;E7EQ64	Putative trypsin-6;Trypsin-2;Trypsin-1;Alpha-trypsin chain 1;Alpha-trypsin chain 2	PRSS1;TRY6;PRSS2	>tr|H0Y8D1|H0Y8D1_HUMAN Trypsin-1 (Fragment) OS=Homo sapiens GN=PRSS1 PE=2 SV=1;>sp|Q8NHM4|TRY6_HUMAN Putative trypsin-6 OS=Homo sapiens GN=PRSS3P2 PE=5 SV=2;>sp|P07478|TRY2_HUMAN Trypsin-2 OS=Homo sapiens GN=PRSS2 PE=1 SV=1;>sp|P07477|TRY1_HUMAN Trypsin-1	321680000	473960000	2069300000	2093300000	325160000	389020000	245410000	180450000	248410000	290730000	106380000	114570000	158910000	1	616310000	415440000	438210000	386190000	115220000	1	474600000	604310000	502500000	644600000
H0Y8E6;P49736	DNA replication licensing factor MCM2	MCM2	>tr|H0Y8E6|H0Y8E6_HUMAN DNA replication licensing factor MCM2 (Fragment) OS=Homo sapiens GN=MCM2 PE=3 SV=1;>sp|P49736|MCM2_HUMAN DNA replication licensing factor MCM2 OS=Homo sapiens GN=MCM2 PE=1 SV=4	21534000	34415000	81810000	72429000	56743000	60717000	42117000	52514000	64946000	65188000	52743000	47344000	43628000	39720000	12630000	33589000	58470000	55056000	25686000	24144000	27714000	9678700	33106000	26093000
H0YA55;P02768;CON__P02768-1;P02768-2;C9JKR2;D6RHD5;B7WNR0	Serum albumin	ALB	>tr|H0YA55|H0YA55_HUMAN Serum albumin (Fragment) OS=Homo sapiens GN=ALB PE=4 SV=1;>sp|P02768|ALBU_HUMAN Serum albumin OS=Homo sapiens GN=ALB PE=1 SV=2;>P02768-1 SWISS-PROT:P02768-1 Tax_Id=9606 Gene_Symbol=ALB Isoform 1 of Serum albumin precursor;>sp|P02768	1	1	11624000	11353000	1	1	4048700	2032300	6797700	1	8337600	10185000	1	1	1	1	1	1	5658900	1	4512000	4084800	1	3585700
H0YAS9;Q15006	ER membrane protein complex subunit 2	EMC2	>tr|H0YAS9|H0YAS9_HUMAN ER membrane protein complex subunit 2 (Fragment) OS=Homo sapiens GN=EMC2 PE=4 SV=1;>sp|Q15006|EMC2_HUMAN ER membrane protein complex subunit 2 OS=Homo sapiens GN=EMC2 PE=1 SV=1	1	1	3454300	1	1	1	4149500	3617600	3600600	3000000	2973800	3301300	3253200	4485100	1	1	3753500	1	1	3150400	1	1	5809800	6468700
H0YAZ4		CNGB3	>tr|H0YAZ4|H0YAZ4_HUMAN Cyclic nucleotide-gated cation channel beta-3 (Fragment) OS=Homo sapiens GN=CNGB3 PE=2 SV=1	225520000	1	304230000	1	211300000	248770000	113000000	1	13335000	271640000	226140000	244970000	117410000	18593000	343730000	1	1	1	230060000	1	23630000	28363000	1	1
H0YC04;P21281;C9J5E3;C9JNS9;C9JL73;P15313	V-type proton ATPase subunit B, brain isoform	ATP6V1B2	>tr|H0YC04|H0YC04_HUMAN V-type proton ATPase subunit B, brain isoform (Fragment) OS=Homo sapiens GN=ATP6V1B2 PE=4 SV=1;>sp|P21281|VATB2_HUMAN V-type proton ATPase subunit B, brain isoform OS=Homo sapiens GN=ATP6V1B2 PE=1 SV=3	1	1	1	1	1	1	1	5240100	4159000	1	5594800	3512700	7383300	6372600	6270600	10307000	15722000	8487600	1	4480300	1	7227900	6804900	7582500
H0YEL5;A6NNE7;C9JQD4;O43447	Peptidyl-prolyl cis-trans isomerase;Peptidyl-prolyl cis-trans isomerase H	PPIH	>tr|H0YEL5|H0YEL5_HUMAN Peptidyl-prolyl cis-trans isomerase H (Fragment) OS=Homo sapiens GN=PPIH PE=2 SV=1;>tr|A6NNE7|A6NNE7_HUMAN Peptidyl-prolyl cis-trans isomerase OS=Homo sapiens GN=PPIH PE=2 SV=1;>tr|C9JQD4|C9JQD4_HUMAN Peptidyl-prolyl cis-trans isome	8783800	1	1	9133400	10845000	7684400	8539100	11476000	1	1	7902500	7667000	7543100	8729000	8937400	7271800	9676100	12583000	6404600	7850000	10474000	6593700	13642000	10569000
H0YJ63;G3V438;H0YJG7;B4DUR9;O95433	Activator of 90 kDa heat shock protein ATPase homolog 1	AHSA1	>tr|H0YJ63|H0YJ63_HUMAN Activator of 90 kDa heat shock protein ATPase homolog 1 (Fragment) OS=Homo sapiens GN=AHSA1 PE=4 SV=1;>tr|G3V438|G3V438_HUMAN Activator of 90 kDa heat shock protein ATPase homolog 1 (Fragment) OS=Homo sapiens GN=AHSA1 PE=2 SV=1;>tr|	1	4333200	10389000	14322000	1	5195300	1	1	8930900	1	1	5493300	6824600	1	1	1	1	1	6539900	1	1	1	1	1
H0YJV7;P25490;O15391	Transcriptional repressor protein YY1;Transcription factor YY2	YY1;YY2	>tr|H0YJV7|H0YJV7_HUMAN Transcriptional repressor protein YY1 (Fragment) OS=Homo sapiens GN=YY1 PE=4 SV=1;>sp|P25490|TYY1_HUMAN Transcriptional repressor protein YY1 OS=Homo sapiens GN=YY1 PE=1 SV=2;>sp|O15391|TYY2_HUMAN Transcription factor YY2 OS=Homo sa	1	2023400	1	1	1447400	1479200	1	1	2900200	5335000	1224700	1459000	1	1296100	852570	1	776760	1	4238900	2109400	765250	713130	1	1
H0YN26;P39687;H7BZ09;O43423	Acidic leucine-rich nuclear phosphoprotein 32 family member A	ANP32A	>tr|H0YN26|H0YN26_HUMAN Acidic leucine-rich nuclear phosphoprotein 32 family member A OS=Homo sapiens GN=ANP32A PE=2 SV=1;>sp|P39687|AN32A_HUMAN Acidic leucine-rich nuclear phosphoprotein 32 family member A OS=Homo sapiens GN=ANP32A PE=1 SV=1	12920000	9353200	1	1	20616000	1	23549000	1	26606000	16770000	16752000	25459000	9845100	39751000	12655000	23213000	18024000	17867000	4726100	1	8192700	15337000	1	1
H0YNG3;H0YK72;P67812;H0YK83;H0YNX5;H0YKT4;H0YNA5;B4DUL4	Signal peptidase complex catalytic subunit SEC11A	SEC11A	>tr|H0YNG3|H0YNG3_HUMAN Signal peptidase complex catalytic subunit SEC11A OS=Homo sapiens GN=SEC11A PE=2 SV=1;>tr|H0YK72|H0YK72_HUMAN SEC11-like 1 (S. cerevisiae), isoform CRA_a OS=Homo sapiens GN=SEC11A PE=4 SV=1;>sp|P67812|SC11A_HUMAN Signal peptidase co	2932800	4012700	7401200	2485900	3804100	6121400	12129000	5395900	1	7794500	7438800	6121700	18699000	9465000	9410600	3970800	11564000	1	8350300	7386300	7919500	7760200	1	9268100
H3BLU7;O43488;Q8NHP1	Aflatoxin B1 aldehyde reductase member 2;Aflatoxin B1 aldehyde reductase member 4	AKR7A2;AKR7L	>tr|H3BLU7|H3BLU7_HUMAN Aflatoxin B1 aldehyde reductase member 2 (Fragment) OS=Homo sapiens GN=AKR7A2 PE=2 SV=1;>sp|O43488|ARK72_HUMAN Aflatoxin B1 aldehyde reductase member 2 OS=Homo sapiens GN=AKR7A2 PE=1 SV=3;>sp|Q8NHP1|ARK74_HUMAN Aflatoxin B1 aldehyde	4076300	1	1	5560300	5878000	1	6104400	6511900	4407100	5257000	5564700	10494000	4667000	4484800	3168800	4607100	6374000	4507000	4084900	12344000	1	4216000	1	1
H3BM42;Q92896;Q92896-3;Q92896-2;H3BQT1;H3BQU9	Golgi apparatus protein 1	GLG1	>tr|H3BM42|H3BM42_HUMAN Golgi apparatus protein 1 OS=Homo sapiens GN=GLG1 PE=4 SV=1;>sp|Q92896|GSLG1_HUMAN Golgi apparatus protein 1 OS=Homo sapiens GN=GLG1 PE=1 SV=2;>sp|Q92896-3|GSLG1_HUMAN Isoform 3 of Golgi apparatus protein 1 OS=Homo sapiens GN=GLG1;>	5927000	1	1	1	1	31161000	12438000	17974000	10971000	8800000	21701000	1	10372000	9550000	13088000	10856000	13958000	15014000	7927500	10297000	14157000	19575000	11876000	15228000
H3BM50;H3BPU5;H3BPT1;H3BN58;Q9BVC4-4;Q9BVC4-5;Q9BVC4;H3BR25;Q9BVC4-3;H3BSZ4	Target of rapamycin complex subunit LST8	MLST8	>tr|H3BM50|H3BM50_HUMAN Target of rapamycin complex subunit LST8 OS=Homo sapiens GN=MLST8 PE=4 SV=1;>tr|H3BPU5|H3BPU5_HUMAN Target of rapamycin complex subunit LST8 OS=Homo sapiens GN=MLST8 PE=2 SV=1;>tr|H3BPT1|H3BPT1_HUMAN Target of rapamycin complex subu	1	1	1	1	10257000	1	14850000	15253000	14568000	1	13298000	6747600	12756000	12194000	29577000	29201000	11143000	15923000	6215000	15356000	21272000	27246000	8642800	8505600
H3BN98;H3BPJ2;F5GXP4;Q15041			>tr|H3BN98|H3BN98_HUMAN Uncharacterized protein (Fragment) OS=Homo sapiens PE=4 SV=2	1	1	1	1	1	1	2361200	1985400	1	4689200	1	2399600	1	1003100	1	1	5340400	4686200	4508900	4149000	1	1	5044600	5085100
H3BND8;F5H8E5;B7Z815;Q93009;F5H2X1	Ubiquitin carboxyl-terminal hydrolase;Ubiquitin carboxyl-terminal hydrolase 7	USP7	>tr|H3BND8|H3BND8_HUMAN Ubiquitin carboxyl-terminal hydrolase (Fragment) OS=Homo sapiens GN=USP7 PE=2 SV=1;>tr|F5H8E5|F5H8E5_HUMAN Ubiquitin carboxyl-terminal hydrolase OS=Homo sapiens GN=USP7 PE=2 SV=1;>tr|B7Z815|B7Z815_HUMAN Ubiquitin carboxyl-terminal h	22255000	38101000	15927000	31809000	29530000	38451000	45212000	29363000	17359000	26915000	28667000	13941000	21991000	26265000	25549000	22538000	34624000	9742900	11842000	19985000	214830000	10929000	39743000	27054000
H3BNF1;H3BUV4;H3BUT1;Q9NWW5;H3BRN7;H3BTY4;B4DDH6	Ceroid-lipofuscinosis neuronal protein 6	CLN6	>tr|H3BNF1|H3BNF1_HUMAN Ceroid-lipofuscinosis neuronal protein 6 OS=Homo sapiens GN=CLN6 PE=2 SV=1;>tr|H3BUV4|H3BUV4_HUMAN Ceroid-lipofuscinosis neuronal protein 6 OS=Homo sapiens GN=CLN6 PE=2 SV=1;>tr|H3BUT1|H3BUT1_HUMAN Ceroid-lipofuscinosis neuronal pro	1	1	1	1	1	1	2216200	2043100	1	3082800	4171800	1	4725100	3443000	1	1	6929400	1352300	1982600	1	1	1	2763400	2830900
H3BPJ9;O96000;Q96II6;H3BV16	NADH dehydrogenase [ubiquinone] 1 beta subcomplex subunit 10	NDUFB10	>tr|H3BPJ9|H3BPJ9_HUMAN NADH dehydrogenase [ubiquinone] 1 beta subcomplex subunit 10 OS=Homo sapiens GN=NDUFB10 PE=2 SV=1;>sp|O96000|NDUBA_HUMAN NADH dehydrogenase [ubiquinone] 1 beta subcomplex subunit 10 OS=Homo sapiens GN=NDUFB10 PE=1 SV=3;>tr|Q96II6|Q9	11236000	16842000	1	9267500	9237300	8271900	1	1	14235000	14204000	24651000	16063000	16781000	30777000	16453000	1	24492000	9676600	10621000	10919000	18118000	19254000	19579000	30451000
H3BRV0;Q99613;B5ME19;H3BPE3;H3BPE4;H3BTY8	Eukaryotic translation initiation factor 3 subunit C;Eukaryotic translation initiation factor 3 subunit C-like protein	EIF3C;EIF3CL	>tr|H3BRV0|H3BRV0_HUMAN Eukaryotic translation initiation factor 3 subunit C OS=Homo sapiens GN=EIF3C PE=2 SV=1;>sp|Q99613|EIF3C_HUMAN Eukaryotic translation initiation factor 3 subunit C OS=Homo sapiens GN=EIF3C PE=1 SV=1;>sp|B5ME19|EIFCL_HUMAN Eukaryotic	400900000	457310000	980070000	819500000	484290000	474540000	301800000	315200000	286500000	359840000	306000000	257060000	200690000	207740000	193180000	246420000	194790000	243950000	218090000	224020000	298270000	281680000	256560000	254100000
H3BUR4;Q9ULX3	RNA-binding protein NOB1	NOB1	>tr|H3BUR4|H3BUR4_HUMAN RNA-binding protein NOB1 OS=Homo sapiens GN=NOB1 PE=4 SV=1;>sp|Q9ULX3|NOB1_HUMAN RNA-binding protein NOB1 OS=Homo sapiens GN=NOB1 PE=1 SV=1	1	7610700	1	6855500	6301300	8080700	8298100	6497100	8668500	6615400	4449200	5794200	5945700	7253600	6781900	1	5531300	4352400	5618700	5562200	1	1	1	4899000
H3BV80;H3BMM9;H3BTC0;Q15287;Q15287-3;Q15287-2;H3BPG5;H3BMS0;H3BRK4;H3BTV0;H3BNI3;H3BP82;H3BTR6;H3BUG0;H3BTY0;H3BNU7;H3BUL0	RNA-binding protein with serine-rich domain 1	RNPS1	>tr|H3BV80|H3BV80_HUMAN RNA-binding protein with serine-rich domain 1 OS=Homo sapiens GN=RNPS1 PE=4 SV=2;>tr|H3BMM9|H3BMM9_HUMAN RNA-binding protein with serine-rich domain 1 (Fragment) OS=Homo sapiens GN=RNPS1 PE=2 SV=1;>tr|H3BTC0|H3BTC0_HUMAN RNA-binding	134150000	139980000	71123000	94367000	84022000	75943000	128700000	143490000	126700000	126720000	111660000	118710000	99605000	103950000	129600000	178980000	77976000	79482000	417220000	419310000	291860000	314880000	249360000	227270000
H7BXH2;E9PKF6;Q5H9R7-6;Q5H9R7-2;Q5H9R7;Q5H9R7-5;G8JLI3;Q5H9R7-3;Q5H9R7-4;E9PQP7;H0YEN2;E9PNN8;E9PKG4;H0YDW1;E9PJD8;H0YEV0;E9PK08	Serine/threonine-protein phosphatase 6 regulatory subunit 3	PPP6R3	>tr|H7BXH2|H7BXH2_HUMAN Serine/threonine-protein phosphatase 6 regulatory subunit 3 OS=Homo sapiens GN=PPP6R3 PE=2 SV=1;>tr|E9PKF6|E9PKF6_HUMAN Serine/threonine-protein phosphatase 6 regulatory subunit 3 OS=Homo sapiens GN=PPP6R3 PE=2 SV=1;>sp|Q5H9R7-6|PP6	1	1107600	6652400	6357200	1	888090	9728200	11184000	2761900	2933100	4783300	4468900	80851000	61522000	39190000	68390000	28655000	42839000	11295000	4100900	8031700	7390900	15568000	17268000
H7BY36;Q01844-2;C9JGE3;Q01844-6;B0QYK0;Q01844-3;Q01844;Q01844-5	RNA-binding protein EWS	EWSR1	>tr|H7BY36|H7BY36_HUMAN RNA-binding protein EWS (Fragment) OS=Homo sapiens GN=EWSR1 PE=4 SV=1;>sp|Q01844-2|EWS_HUMAN Isoform EWS-B of RNA-binding protein EWS OS=Homo sapiens GN=EWSR1;>tr|C9JGE3|C9JGE3_HUMAN Ewing sarcoma breakpoint region 1, isoform CRA_e	64705000	26175000	24969000	20277000	54399000	84612000	7694900	8190400	35401000	32823000	59934000	44692000	13754000	6278900	47083000	35542000	33974000	38615000	23889000	9274600	11115000	12693000	37805000	31814000
H7BYW1;Q9NRW1;P20340-2;P20340;C9JB90;F5H3K7;C9J0I2;C9JU14;F5GX61;P20340-3;J3KR73;P20340-4;B7Z337;H0YGL6	Ras-related protein Rab-6B;Ras-related protein Rab-6A	RAB6A;RAB6B	>tr|H7BYW1|H7BYW1_HUMAN Ras-related protein Rab-6A (Fragment) OS=Homo sapiens GN=RAB6A PE=3 SV=1;>sp|Q9NRW1|RAB6B_HUMAN Ras-related protein Rab-6B OS=Homo sapiens GN=RAB6B PE=1 SV=1;>sp|P20340-2|RAB6A_HUMAN Isoform 2 of Ras-related protein Rab-6A OS=Homo s	31435000	39407000	58802000	56259000	32073000	34582000	42764000	47797000	46391000	46399000	47657000	52390000	67025000	83470000	56261000	106530000	72069000	93346000	52732000	55799000	54585000	59617000	56744000	53895000
H7BZJ3	Thioredoxin	PDIA3	>tr|H7BZJ3|H7BZJ3_HUMAN Thioredoxin (Fragment) OS=Homo sapiens GN=PDIA3 PE=2 SV=1	1	1	33738000	1	9387200	18395000	1	9037700	22546000	17879000	11392000	8206200	7244400	10525000	12193000	16791000	15950000	20358000	3400900	1	9206700	1	1	1
H7C218;H7C0X5;Q9H3G5	Probable serine carboxypeptidase CPVL	CPVL	>tr|H7C218|H7C218_HUMAN Probable serine carboxypeptidase CPVL (Fragment) OS=Homo sapiens GN=CPVL PE=2 SV=1;>tr|H7C0X5|H7C0X5_HUMAN Probable serine carboxypeptidase CPVL (Fragment) OS=Homo sapiens GN=CPVL PE=4 SV=1;>sp|Q9H3G5|CPVL_HUMAN Probable serine carb	5016500	5927200	1	1	3791100	5196900	4044100	4280000	4574400	3253200	4127500	4013800	1	1	1	1	2547500	3225600	5195200	5471900	1	1	4002800	2882000
H7C560;H7C4S5		BRAF	>tr|H7C560|H7C560_HUMAN Serine/threonine-protein kinase B-raf (Fragment) OS=Homo sapiens GN=BRAF PE=3 SV=1	1	1	1	1	1	1	27666000	23750000	17093000	12284000	19286000	20451000	30891000	30729000	48066000	28021000	38553000	39100000	31159000	45848000	42524000	41906000	36166000	41711000
I3L0H8;Q9UMR2-2;Q9UMR2-4;Q9NUU7;Q9UMR2;H3BQK0;H3BTB3;H3BMQ5;H3BN59;Q9UMR2-3;B4DRZ7;I3L352	ATP-dependent RNA helicase DDX19B;ATP-dependent RNA helicase DDX19A	DDX19A;DDX19B	>tr|I3L0H8|I3L0H8_HUMAN ATP-dependent RNA helicase DDX19A OS=Homo sapiens GN=DDX19A PE=2 SV=1;>sp|Q9UMR2-2|DD19B_HUMAN Isoform 2 of ATP-dependent RNA helicase DDX19B OS=Homo sapiens GN=DDX19B;>sp|Q9UMR2-4|DD19B_HUMAN Isoform 4 of ATP-dependent RNA helicase	4819900	6552000	12220000	1	7844100	6723900	6042800	5517900	8309400	9322300	4157800	4872900	5924700	5852200	4508800	1	9276900	8051100	4715500	4359900	1	1	1	9665600
I3L0T6;Q9HC36;I3L443	RNA methyltransferase-like protein 1	RNMTL1	>tr|I3L0T6|I3L0T6_HUMAN RNA methyltransferase-like protein 1 OS=Homo sapiens GN=RNMTL1 PE=2 SV=1;>sp|Q9HC36|RMTL1_HUMAN RNA methyltransferase-like protein 1 OS=Homo sapiens GN=RNMTL1 PE=1 SV=2	9507000	10655000	1	1	1	8311600	9953400	9465100	8912800	9389500	1	6907700	1	8968000	6395600	7139800	7267300	9743200	12087000	9954600	9040300	9323400	9456100	9196600
I3L112;P52429	Diacylglycerol kinase epsilon	DGKE	>tr|I3L112|I3L112_HUMAN Diacylglycerol kinase epsilon (Fragment) OS=Homo sapiens GN=DGKE PE=4 SV=1;>sp|P52429|DGKE_HUMAN Diacylglycerol kinase epsilon OS=Homo sapiens GN=DGKE PE=1 SV=1	1	1	1	1	1	1	1	6703100	1	1	5230400	5407700	5756800	10109000	1	1	1	1	11624000	12952000	1	1	1	1
I3L1P8;Q02978;Q02978-2	Mitochondrial 2-oxoglutarate/malate carrier protein	SLC25A11	>tr|I3L1P8|I3L1P8_HUMAN Mitochondrial 2-oxoglutarate/malate carrier protein (Fragment) OS=Homo sapiens GN=SLC25A11 PE=2 SV=1;>sp|Q02978|M2OM_HUMAN Mitochondrial 2-oxoglutarate/malate carrier protein OS=Homo sapiens GN=SLC25A11 PE=1 SV=3;>sp|Q02978-2|M2OM_H	63541000	51350000	1	6296200	48735000	45206000	139460000	150700000	79095000	88807000	106210000	117450000	258490000	281070000	336660000	287070000	242670000	191050000	122920000	144880000	207740000	236610000	181210000	170860000
I3L2C7;P57678;I3L399;I3L4A4;I3L4M4;E7EN12;I3L1J7	Gem-associated protein 4	GEMIN4	>tr|I3L2C7|I3L2C7_HUMAN Gem-associated protein 4 OS=Homo sapiens GN=GEMIN4 PE=2 SV=1;>sp|P57678|GEMI4_HUMAN Gem-associated protein 4 OS=Homo sapiens GN=GEMIN4 PE=1 SV=2	25548000	8163000	3659600	6260400	20559000	10008000	348300000	357410000	205110000	233000000	376440000	325820000	572210000	747290000	679620000	751520000	583470000	619650000	567680000	560080000	748410000	697650000	632660000	669660000
I3L2Z5;P56270-3;P56270;P56270-2;I3L411;I3L4Y2;H3BPU3;I3L0M3;H3BQS2;H3BQD6;H3BQI4;J3QSH4;Q14119;Q9HBE1-4;Q9HBE1-2;Q9HBE1-3;Q9HBE1	Myc-associated zinc finger protein;Vascular endothelial zinc finger 1;POZ-, AT hook-, and zinc finger-containing protein 1	MAZ;VEZF1;PATZ1	>tr|I3L2Z5|I3L2Z5_HUMAN Myc-associated zinc finger protein (Fragment) OS=Homo sapiens GN=MAZ PE=2 SV=1;>sp|P56270-3|MAZ_HUMAN Isoform 3 of Myc-associated zinc finger protein OS=Homo sapiens GN=MAZ;>sp|P56270|MAZ_HUMAN Myc-associated zinc finger protein OS=	1	1	1	5375200	1	1	16535000	1	1	1	1	1	1	4781500	1	1	1	1	1	7097200	1	1	5326200	5678300
I3L397;P63241;P63241-2;I3L504;F8WCJ1;C9J7B5;C9J4W5;Q9GZV4;Q6IS14	Eukaryotic translation initiation factor 5A-1;Eukaryotic translation initiation factor 5A-2;Eukaryotic translation initiation factor 5A-1-like	EIF5A;EIF5A2;EIF5AL1	>tr|I3L397|I3L397_HUMAN Eukaryotic translation initiation factor 5A-1 (Fragment) OS=Homo sapiens GN=EIF5A PE=2 SV=2;>sp|P63241|IF5A1_HUMAN Eukaryotic translation initiation factor 5A-1 OS=Homo sapiens GN=EIF5A PE=1 SV=2;>sp|P63241-2|IF5A1_HUMAN Isoform 2 o	125500000	116490000	763660000	353170000	214260000	222700000	155710000	164030000	290710000	262720000	195220000	184460000	151040000	134260000	108240000	195590000	309310000	194740000	99229000	100220000	107680000	86491000	146480000	137720000
I3L3E9;P39748-2;P39748	Flap endonuclease 1	FEN1	>tr|I3L3E9|I3L3E9_HUMAN Flap endonuclease 1 (Fragment) OS=Homo sapiens GN=FEN1 PE=4 SV=1;>sp|P39748-2|FEN1_HUMAN Isoform FENMIT of Flap endonuclease 1 OS=Homo sapiens GN=FEN1;>sp|P39748|FEN1_HUMAN Flap endonuclease 1 OS=Homo sapiens GN=FEN1 PE=1 SV=1	1	1	1	1	1	1	5951300	3399200	14927000	5627500	4853800	4423400	1	1	1	6403400	8901000	11649000	1	1	1	1	5087100	5505700
J3KN01		MLLT4	>tr|J3KN01|J3KN01_HUMAN Afadin OS=Homo sapiens GN=MLLT4 PE=2 SV=1	1	1	1	1	1	1	1	1	1	1	1	1	1	1	1	1	3376700	3569000	1	1	1	1	1	1
J3KQE0;Q9UH99-3;Q9UH99;Q9UH99-2	SUN domain-containing protein 2	SUN2	>tr|J3KQE0|J3KQE0_HUMAN SUN domain-containing protein 2 OS=Homo sapiens GN=SUN2 PE=2 SV=1;>sp|Q9UH99-3|SUN2_HUMAN Isoform 3 of SUN domain-containing protein 2 OS=Homo sapiens GN=SUN2;>sp|Q9UH99|SUN2_HUMAN SUN domain-containing protein 2 OS=Homo sapiens GN=	66389000	37276000	804290	14096000	33327000	30764000	46108000	44057000	28349000	30705000	19196000	12638000	24733000	24942000	22549000	1	19771000	13808000	27527000	17364000	1	2821400	23291000	26727000
J3KR24;P41252;Q5TCC4;Q5TCC5;Q5TCD2;Q5TCD1;Q5TCC6	Isoleucine--tRNA ligase, cytoplasmic	IARS	>tr|J3KR24|J3KR24_HUMAN Isoleucine--tRNA ligase, cytoplasmic OS=Homo sapiens GN=IARS PE=4 SV=1;>sp|P41252|SYIC_HUMAN Isoleucine--tRNA ligase, cytoplasmic OS=Homo sapiens GN=IARS PE=1 SV=2	75483000	85589000	102700000	15493000	96570000	108140000	128120000	214950000	129440000	140910000	135300000	145950000	179580000	185650000	273220000	194810000	179580000	222510000	146450000	137450000	169540000	241700000	193810000	197980000
J3KS95;H3BNV7;Q9Y3D0	Mitotic spindle-associated MMXD complex subunit MIP18	FAM96B	>tr|J3KS95|J3KS95_HUMAN Mitotic spindle-associated MMXD complex subunit MIP18 (Fragment) OS=Homo sapiens GN=FAM96B PE=2 SV=1;>tr|H3BNV7|H3BNV7_HUMAN Mitotic spindle-associated MMXD complex subunit MIP18 (Fragment) OS=Homo sapiens GN=FAM96B PE=4 SV=1;>sp|Q9	1	1	1	1	1	1	1	1	1	1	1	5497800	9020700	9373400	7244800	1	5211600	1	5762700	6492700	5796100	1	5216100	5454600
J3KSH8;J3KT51;Q9UK76-3;F5GY98;Q9UK76;Q9UK76-2	Hematological and neurological expressed 1 protein	HN1	>tr|J3KSH8|J3KSH8_HUMAN Hematological and neurological-expressed 1 protein (Fragment) OS=Homo sapiens GN=HN1 PE=2 SV=2;>tr|J3KT51|J3KT51_HUMAN Hematological and neurological-expressed 1 protein OS=Homo sapiens GN=HN1 PE=2 SV=1;>sp|Q9UK76-3|HN1_HUMAN Isofor	1	1	1	1	6072700	6795900	4456300	5192300	7405400	7375900	26425000	13191000	3614900	1	2449200	2561100	5529900	3781200	1	1	2231300	2066900	1	1
J3KTF8;P52565;J3QQX2;J3KRE2;P52565-2;J3KRY1;J3KS60	Rho GDP-dissociation inhibitor 1	ARHGDIA	>tr|J3KTF8|J3KTF8_HUMAN Rho GDP-dissociation inhibitor 1 (Fragment) OS=Homo sapiens GN=ARHGDIA PE=2 SV=2;>sp|P52565|GDIR1_HUMAN Rho GDP-dissociation inhibitor 1 OS=Homo sapiens GN=ARHGDIA PE=1 SV=3;>tr|J3QQX2|J3QQX2_HUMAN Rho GDP-dissociation inhibitor 1 O	1753500	1	38232000	31758000	8311400	26060000	10094000	5230900	40146000	42372000	14292000	31892000	14092000	21467000	26497000	19166000	37636000	36127000	8512300	7897100	1115500000	1095600000	17267000	40902000
J3QKW1;Q0VAN0;M0R0P9;P31751;M0R275;J3QLS6;C9JHS6	RAC-beta serine/threonine-protein kinase	AKT2	>tr|J3QKW1|J3QKW1_HUMAN RAC-beta serine/threonine-protein kinase (Fragment) OS=Homo sapiens GN=AKT2 PE=2 SV=1;>tr|Q0VAN0|Q0VAN0_HUMAN AKT2 protein OS=Homo sapiens GN=AKT2 PE=2 SV=1;>tr|M0R0P9|M0R0P9_HUMAN RAC-beta serine/threonine-protein kinase OS=Homo sa	1	7377900	1	1	6355800	16593000	1	2899100	1	5838400	5950800	4516500	4410600	5283600	1	1	3533300	1	4471500	3604300	4148800	4679200	1	1
J3QL05;J3KP15;B4DN89;Q01130;Q9BRL6-2;Q9BRL6	Serine/arginine-rich splicing factor 2;Serine/arginine-rich splicing factor 8	SRSF2;SFRS2;SRSF8	>tr|J3QL05|J3QL05_HUMAN Serine/arginine-rich-splicing factor 2 (Fragment) OS=Homo sapiens GN=SRSF2 PE=2 SV=1;>tr|J3KP15|J3KP15_HUMAN Serine/arginine-rich-splicing factor 2 (Fragment) OS=Homo sapiens GN=SRSF2 PE=2 SV=2;>tr|B4DN89|B4DN89_HUMAN Serine/arginin	102370000	111460000	69929000	141440000	80298000	79944000	40224000	81478000	35737000	87201000	48598000	42716000	38233000	41000000	49441000	67526000	61358000	75013000	34135000	54491000	41205000	41195000	71216000	64925000
J3QL56;O75880	Protein SCO1 homolog, mitochondrial	SCO1	>tr|J3QL56|J3QL56_HUMAN Protein SCO1 homolog, mitochondrial OS=Homo sapiens GN=SCO1 PE=2 SV=1;>sp|O75880|SCO1_HUMAN Protein SCO1 homolog, mitochondrial OS=Homo sapiens GN=SCO1 PE=1 SV=1	1	1	6980000	1	5906500	5811600	1	9041400	1	7326200	1	7674600	10036000	1	8528900	10943000	1	15919000	1	7221200	14003000	11926000	8687300	1
J3QLR8;Q9Y3D9	28S ribosomal protein S23, mitochondrial	MRPS23	>tr|J3QLR8|J3QLR8_HUMAN 28S ribosomal protein S23, mitochondrial OS=Homo sapiens GN=MRPS23 PE=2 SV=1;>sp|Q9Y3D9|RT23_HUMAN 28S ribosomal protein S23, mitochondrial OS=Homo sapiens GN=MRPS23 PE=1 SV=2	28667000	16306000	39563000	21862000	27115000	28281000	35728000	23491000	15464000	19033000	23815000	19276000	16655000	16362000	16654000	17830000	13562000	14227000	21760000	16362000	13261000	14251000	15983000	13828000
J3QQS1;Q9Y2R9;J3QLS3;J3KSI8;J3QKW2	28S ribosomal protein S7, mitochondrial	MRPS7	>tr|J3QQS1|J3QQS1_HUMAN 28S ribosomal protein S7, mitochondrial (Fragment) OS=Homo sapiens GN=MRPS7 PE=4 SV=1;>sp|Q9Y2R9|RT07_HUMAN 28S ribosomal protein S7, mitochondrial OS=Homo sapiens GN=MRPS7 PE=1 SV=2;>tr|J3QLS3|J3QLS3_HUMAN 28S ribosomal protein S7,	16440000	14989000	9250400	1	6249000	22541000	18039000	15176000	5892700	1	10301000	11232000	13616000	17961000	5365700	7378200	9928700	8936500	1	11960000	4622800	1	23361000	9869500
J3QQT2;J3KRX5;P18621;P18621-3;P18621-2;J3QLC8;J3QS96;J3KRB3;J3KSJ0	60S ribosomal protein L17	RPL17	>tr|J3QQT2|J3QQT2_HUMAN 60S ribosomal protein L17 (Fragment) OS=Homo sapiens GN=RPL17 PE=3 SV=1;>tr|J3KRX5|J3KRX5_HUMAN 60S ribosomal protein L17 (Fragment) OS=Homo sapiens GN=RPL17 PE=3 SV=1;>sp|P18621|RL17_HUMAN 60S ribosomal protein L17 OS=Homo sapiens	542490000	588780000	402660000	310810000	492700000	490240000	601050000	722370000	547540000	540540000	489020000	531770000	606310000	561550000	594900000	745150000	480450000	579390000	504020000	420640000	568200000	595150000	471340000	516370000
J3QR09;J3KTE4;P84098;J3QL15	Ribosomal protein L19;60S ribosomal protein L19	RPL19	>tr|J3QR09|J3QR09_HUMAN Ribosomal protein L19 OS=Homo sapiens GN=RPL19 PE=3 SV=1;>tr|J3KTE4|J3KTE4_HUMAN Ribosomal protein L19 OS=Homo sapiens GN=RPL19 PE=3 SV=1;>sp|P84098|RL19_HUMAN 60S ribosomal protein L19 OS=Homo sapiens GN=RPL19 PE=1 SV=1	591340000	586350000	243680000	278000000	491040000	499950000	594740000	588710000	313330000	454130000	431410000	403190000	576020000	573600000	849890000	707520000	453290000	434480000	374230000	564200000	540180000	496130000	429740000	468370000
J3QRD1;P51648;P51648-2;I3L1M4;J3QS00;J3QKK9;J3KTD9;I3L2W1;J3KTG1;C9JGJ2;I3L0X1;E9PJV0;C9JKT2;C9JMC5;I3L3I9;P48448;A8MYB8;E9PNN6;S4R374;P43353-2;P30838;S4R3R5;P43353	Fatty aldehyde dehydrogenase	ALDH3A2	>tr|J3QRD1|J3QRD1_HUMAN Fatty aldehyde dehydrogenase OS=Homo sapiens GN=ALDH3A2 PE=2 SV=1;>sp|P51648|AL3A2_HUMAN Fatty aldehyde dehydrogenase OS=Homo sapiens GN=ALDH3A2 PE=1 SV=1;>sp|P51648-2|AL3A2_HUMAN Isoform 2 of Fatty aldehyde dehydrogenase OS=Homo sa	2223700	1	5665400	7670300	1272600	1	51678000	59281000	11613000	16269000	36310000	35799000	227500000	220950000	314020000	254870000	238650000	164220000	160350000	166700000	294620000	273150000	167590000	165230000
J3QRG6;P42771;P42771-4;K7ES20;P42771-2;P42771-3;G3XAG3;K7ENC6	Cyclin-dependent kinase inhibitor 2A, isoforms 1/2/3	CDKN2A	>tr|J3QRG6|J3QRG6_HUMAN Cyclin-dependent kinase inhibitor 2A, isoforms 1/2/3 OS=Homo sapiens GN=CDKN2A PE=2 SV=1;>sp|P42771|CD2A1_HUMAN Cyclin-dependent kinase inhibitor 2A, isoforms 1/2/3 OS=Homo sapiens GN=CDKN2A PE=1 SV=2;>sp|P42771-4|CD2A1_HUMAN Isofor	1	1	76446000	1	26081000	1	10147000	7631900	1	1	1	1	5994200	8617400	6005100	5391000	17406000	25108000	5143300	1	3385100	6005600	10295000	1
J3QT28;O43684-2;O43684;B4DDM6;J3QSX4	Mitotic checkpoint protein BUB3	BUB3	>tr|J3QT28|J3QT28_HUMAN Mitotic checkpoint protein BUB3 (Fragment) OS=Homo sapiens GN=BUB3 PE=2 SV=1;>sp|O43684-2|BUB3_HUMAN Isoform 2 of Mitotic checkpoint protein BUB3 OS=Homo sapiens GN=BUB3;>sp|O43684|BUB3_HUMAN Mitotic checkpoint protein BUB3 OS=Homo	13464000	11886000	31770000	16761000	14684000	14374000	10446000	14422000	33289000	36049000	13290000	13624000	16500000	10761000	14992000	13166000	20340000	23455000	8367900	10828000	11614000	1	14150000	13730000
K7EID2;B4DP08;Q9BT22	Chitobiosyldiphosphodolichol beta-mannosyltransferase	ALG1	>tr|K7EID2|K7EID2_HUMAN Chitobiosyldiphosphodolichol beta-mannosyltransferase (Fragment) OS=Homo sapiens GN=ALG1 PE=2 SV=2;>tr|B4DP08|B4DP08_HUMAN Chitobiosyldiphosphodolichol beta-mannosyltransferase OS=Homo sapiens GN=ALG1 PE=2 SV=1;>sp|Q9BT22|ALG1_HUMAN	1	6686700	1	1	6884000	1	2465000	11260000	1	6521200	4838800	1	9641100	10877000	8285400	11853000	7251100	11063000	4243500	7035200	9566600	6619200	11291000	8988600
K7EIJ8;Q8IYT4-2;Q8IYT4;K7EM02	Katanin p60 ATPase-containing subunit A-like 2	KATNAL2	>tr|K7EIJ8|K7EIJ8_HUMAN Katanin p60 ATPase-containing subunit A-like 2 (Fragment) OS=Homo sapiens GN=KATNAL2 PE=4 SV=1;>sp|Q8IYT4-2|KATL2_HUMAN Isoform 2 of Katanin p60 ATPase-containing subunit A-like 2 OS=Homo sapiens GN=KATNAL2;>sp|Q8IYT4|KATL2_HUMAN Ka	32510000	37195000	53116000	59869000	51060000	59632000	35510000	37220000	31363000	32062000	31173000	35708000	21861000	34476000	23440000	7344200	36761000	31141000	25675000	21149000	1	1	22551000	24069000
K7EIN4;K7EQ63;Q13445	Transmembrane emp24 domain-containing protein 1	TMED1	>tr|K7EIN4|K7EIN4_HUMAN Transmembrane emp24 domain-containing protein 1 OS=Homo sapiens GN=TMED1 PE=2 SV=1;>tr|K7EQ63|K7EQ63_HUMAN Transmembrane emp24 domain-containing protein 1 (Fragment) OS=Homo sapiens GN=TMED1 PE=2 SV=1;>sp|Q13445|TMED1_HUMAN Transmem	1484700	1715300	1	1	6376500	2541400	7923800	7537900	3499700	1	4545400	1	38679000	38294000	6978600	8643600	12079000	8047400	4205200	7373900	7429400	5529400	6637800	6647700
K7EIY1;Q9Y421;K7ELZ8;Q9Y421-3;Q9Y421-2;K7ENN5	Protein FAM32A	FAM32A	>tr|K7EIY1|K7EIY1_HUMAN Protein FAM32A OS=Homo sapiens GN=FAM32A PE=2 SV=1;>sp|Q9Y421|FA32A_HUMAN Protein FAM32A OS=Homo sapiens GN=FAM32A PE=1 SV=2;>tr|K7ELZ8|K7ELZ8_HUMAN Protein FAM32A (Fragment) OS=Homo sapiens GN=FAM32A PE=2 SV=1;>sp|Q9Y421-3|FA32A_HU	1	10684000	1	1	1	1	1	30400000	14079000	13856000	1	17535000	1	1	1	1	1	1	1	10817000	5139500	1	6040000	5921100
K7EJL5;K7EN19;K7EJV7;K7ER44;K7EPP7;K7EIH8;Q99615-2;Q99615;K7EJE9;K7EK03;K7ELJ8;K7ESP1	DnaJ homolog subfamily C member 7	DNAJC7	>tr|K7EJL5|K7EJL5_HUMAN DnaJ homolog subfamily C member 7 (Fragment) OS=Homo sapiens GN=DNAJC7 PE=2 SV=1;>tr|K7EN19|K7EN19_HUMAN DnaJ homolog subfamily C member 7 (Fragment) OS=Homo sapiens GN=DNAJC7 PE=2 SV=2;>tr|K7EJV7|K7EJV7_HUMAN DnaJ homolog subfamily	1	1	1	1	1	5110100	5615600	4568300	6304700	5806800	1	4847800	2718200	3434200	6003200	6017900	2139800	1	4552500	1	6833200	6084900	5501800	6242700
K7EJT8;P63010;P63010-2;P63010-3	AP-2 complex subunit beta	AP2B1	>tr|K7EJT8|K7EJT8_HUMAN AP-2 complex subunit beta OS=Homo sapiens GN=AP2B1 PE=2 SV=1;>sp|P63010|AP2B1_HUMAN AP-2 complex subunit beta OS=Homo sapiens GN=AP2B1 PE=1 SV=1;>sp|P63010-2|AP2B1_HUMAN Isoform 2 of AP-2 complex subunit beta OS=Homo sapiens GN=AP2B	1	10522000	22933000	28276000	1	12432000	13971000	25844000	18424000	22697000	16967000	19577000	24296000	28589000	27510000	26433000	28747000	24522000	16548000	22363000	13290000	1	25147000	25520000
K7EK07;Q71DI3;Q16695;P84243;P68431;K7EMV3;B4DEB1;K7ES00;Q6NXT2;K7EP01	Histone H3;Histone H3.2;Histone H3.1t;Histone H3.3;Histone H3.1;Histone H3.3C	H3F3B;HIST2H3A;HIST3H3;H3F3A;HIST1H3A;H3F3C	>tr|K7EK07|K7EK07_HUMAN Histone H3 (Fragment) OS=Homo sapiens GN=H3F3B PE=2 SV=1;>sp|Q71DI3|H32_HUMAN Histone H3.2 OS=Homo sapiens GN=HIST2H3A PE=1 SV=3;>sp|Q16695|H31T_HUMAN Histone H3.1t OS=Homo sapiens GN=HIST3H3 PE=1 SV=3;>sp|P84243|H33_HUMAN Histone H	597990000	453240000	53955000	60955000	651320000	690320000	249320000	199220000	171180000	145650000	354860000	410150000	259360000	216320000	126380000	171820000	114050000	121430000	699830000	622610000	102360000	103890000	164920000	168020000
K7EK18;K7EL40;Q9UHD8-4;Q9UHD8-9;Q9UHD8-3;Q9UHD8-8;Q9UHD8-7;Q9UHD8-2;Q9UHD8-5;Q9UHD8;K7EIR4;K7EKN4;K7EN52;K7ENQ5;K7EJZ2;K7ELJ9;K7ER52;K7EIE4;K7EQD7	Septin-9	40057	>tr|K7EK18|K7EK18_HUMAN Septin-9 (Fragment) OS=Homo sapiens GN=SEPT9 PE=2 SV=1;>tr|K7EL40|K7EL40_HUMAN Septin-9 (Fragment) OS=Homo sapiens GN=SEPT9 PE=4 SV=1;>sp|Q9UHD8-4|SEPT9_HUMAN Isoform 4 of Septin-9 OS=Homo sapiens GN=SEPT9;>sp|Q9UHD8-9|SEPT9_HUMAN I	1	1	1	11037000	2808700	2118600	4883300	6316800	4393600	3140400	3216300	3592800	6255300	6004900	1	6322000	1	1	3441600	3827300	1	1578300	1	4663500
K7EKE5;K7EIS0;Q9NRH3;P23258	Tubulin gamma chain;Tubulin gamma-2 chain;Tubulin gamma-1 chain	TUBG1;TUBG2	>tr|K7EKE5|K7EKE5_HUMAN Tubulin gamma-1 chain OS=Homo sapiens GN=TUBG1 PE=2 SV=1;>tr|K7EIS0|K7EIS0_HUMAN Tubulin gamma chain (Fragment) OS=Homo sapiens GN=TUBG1 PE=2 SV=1;>sp|Q9NRH3|TBG2_HUMAN Tubulin gamma-2 chain OS=Homo sapiens GN=TUBG2 PE=1 SV=1;>sp|P2	2209300	1	4796600	1	1	4706400	4215100	4933300	4334600	3134000	2911600	1	3492100	1	1	4920500	1	4269300	2219200	1	3979600	3648900	4236200	3298900
K7EKI4;K7ELF1;K7ELQ0;Q9BYD3-2;K7ES61;Q9BYD3	39S ribosomal protein L4, mitochondrial	MRPL4	>tr|K7EKI4|K7EKI4_HUMAN 39S ribosomal protein L4, mitochondrial OS=Homo sapiens GN=MRPL4 PE=2 SV=1;>tr|K7ELF1|K7ELF1_HUMAN 39S ribosomal protein L4, mitochondrial (Fragment) OS=Homo sapiens GN=MRPL4 PE=2 SV=1;>tr|K7ELQ0|K7ELQ0_HUMAN 39S ribosomal protein L	7815800	12574000	14279000	1	9043000	9910500	9741300	1	8286800	9097900	7979800	1	9348800	8441100	6486500	7120500	10345000	9140500	8154900	6903700	6602700	6473300	10146000	7593200
K7ELC4;K7EMH1;K7ERI7;P35268;K7EP65;K7EKS7;K7EJT5	60S ribosomal protein L22	RPL22	>tr|K7ELC4|K7ELC4_HUMAN 60S ribosomal protein L22 (Fragment) OS=Homo sapiens GN=RPL22 PE=2 SV=1;>tr|K7EMH1|K7EMH1_HUMAN 60S ribosomal protein L22 (Fragment) OS=Homo sapiens GN=RPL22 PE=2 SV=1;>tr|K7ERI7|K7ERI7_HUMAN 60S ribosomal protein L22 OS=Homo sapien	156600000	170170000	177660000	194160000	186700000	179650000	307700000	278980000	286980000	271700000	287310000	275290000	265520000	414510000	577790000	243010000	314510000	377050000	244100000	235540000	783430000	406990000	300590000	294000000
K7ELW0;Q99497;K7EN27	Protein DJ-1	PARK7	>tr|K7ELW0|K7ELW0_HUMAN Protein DJ-1 OS=Homo sapiens GN=PARK7 PE=2 SV=1;>sp|Q99497|PARK7_HUMAN Protein DJ-1 OS=Homo sapiens GN=PARK7 PE=1 SV=2;>tr|K7EN27|K7EN27_HUMAN Protein DJ-1 (Fragment) OS=Homo sapiens GN=PARK7 PE=2 SV=1	12520000	19116000	55212000	48484000	18500000	16435000	17088000	20861000	22008000	19042000	18981000	19995000	21901000	15052000	1	18927000	33714000	29377000	8542100	9851400	1	21468000	23483000	19428000
K7EM38		ACTG1	>tr|K7EM38|K7EM38_HUMAN Actin, cytoplasmic 2, N-terminally processed (Fragment) OS=Homo sapiens GN=ACTG1 PE=3 SV=1	1	1	1	1	1	1	1	1	1	1	1	1	1	1	1	1	1	1	1	1	1	1	1	1
K7EMN2;K7EM49;K7EPF6;F5H7U0;B4DQJ8;P52209	6-phosphogluconate dehydrogenase, decarboxylating	PGD	>tr|K7EMN2|K7EMN2_HUMAN 6-phosphogluconate dehydrogenase, decarboxylating (Fragment) OS=Homo sapiens GN=PGD PE=2 SV=1;>tr|K7EM49|K7EM49_HUMAN 6-phosphogluconate dehydrogenase, decarboxylating (Fragment) OS=Homo sapiens GN=PGD PE=2 SV=1;>tr|K7EPF6|K7EPF6_HU	5525700	1	1	1	10661000	7677500	8636500	12216000	16114000	27035000	13629000	14217000	7744600	14815000	1	1	17049000	21530000	11577000	7326300	14612000	1	13427000	11402000
K7EN45;Q13526;K7EMU7	Peptidyl-prolyl cis-trans isomerase NIMA-interacting 1	PIN1	>tr|K7EN45|K7EN45_HUMAN Peptidyl-prolyl cis-trans isomerase NIMA-interacting 1 (Fragment) OS=Homo sapiens GN=PIN1 PE=4 SV=1;>sp|Q13526|PIN1_HUMAN Peptidyl-prolyl cis-trans isomerase NIMA-interacting 1 OS=Homo sapiens GN=PIN1 PE=1 SV=1;>tr|K7EMU7|K7EMU7_HUM	9011400	12189000	1	19908000	16907000	13485000	8540700	10251000	19004000	22789000	12887000	11722000	8896300	7247300	7723900	8228800	14985000	6497000	7811300	1	1	1	1	1
K7EPJ1;Q16763	Ubiquitin-conjugating enzyme E2 S	UBE2S	>tr|K7EPJ1|K7EPJ1_HUMAN Ubiquitin-conjugating enzyme E2 S (Fragment) OS=Homo sapiens GN=UBE2S PE=3 SV=1;>sp|Q16763|UBE2S_HUMAN Ubiquitin-conjugating enzyme E2 S OS=Homo sapiens GN=UBE2S PE=1 SV=2	8754900	1	1	1	50322000	1	1	1	1	1	1	1	1	1	1	1	2639100	2228000	1	1	1	2097000	3292900	2407000
K7ES31;K7EMQ9;K7ERF1;B7ZAM9;Q9UBQ5;K7EQM4	Eukaryotic translation initiation factor 3 subunit K	EIF3K	>tr|K7ES31|K7ES31_HUMAN Eukaryotic translation initiation factor 3 subunit K OS=Homo sapiens GN=EIF3K PE=2 SV=1;>tr|K7EMQ9|K7EMQ9_HUMAN Eukaryotic translation initiation factor 3 subunit K (Fragment) OS=Homo sapiens GN=EIF3K PE=2 SV=1;>tr|K7ERF1|K7ERF1_HUM	24616000	40383000	156660000	175340000	38656000	39407000	39700000	40903000	30338000	28914000	47275000	40772000	25345000	28599000	47619000	44506000	31721000	30697000	24346000	26576000	46316000	70771000	39727000	18319000
M0QXM4;Q15758;Q15758-3;Q15758-2;M0QX44	Neutral amino acid transporter B(0)	SLC1A5	>tr|M0QXM4|M0QXM4_HUMAN Neutral amino acid transporter B(0) OS=Homo sapiens GN=SLC1A5 PE=2 SV=1;>sp|Q15758|AAAT_HUMAN Neutral amino acid transporter B(0) OS=Homo sapiens GN=SLC1A5 PE=1 SV=2;>sp|Q15758-3|AAAT_HUMAN Isoform 3 of Neutral amino acid transporte	1	1	1	1	15989000	1	15566000	14945000	33291000	1	18606000	25574000	22393000	22803000	36865000	37687000	33483000	27806000	1	13130000	14006000	13197000	14034000	14559000
M0QYL4;O43823	A-kinase anchor protein 8	AKAP8	>tr|M0QYL4|M0QYL4_HUMAN A-kinase anchor protein 8 (Fragment) OS=Homo sapiens GN=AKAP8 PE=2 SV=2;>sp|O43823|AKAP8_HUMAN A-kinase anchor protein 8 OS=Homo sapiens GN=AKAP8 PE=1 SV=1	1	1	1	1	1	1	1	4057900	1	1	1	1	1	26337000	1	1	1	1	1	14279000	1	1	10502000	13844000
M0R088;Q8IYB3-2;Q8IYB3;A9Z1X7;E9PCT1;M0QXG5;M0R1E7	Serine/arginine repetitive matrix protein 1	SRRM1	>tr|M0R088|M0R088_HUMAN Serine/arginine repetitive matrix protein 1 (Fragment) OS=Homo sapiens GN=SRRM1 PE=2 SV=1;>sp|Q8IYB3-2|SRRM1_HUMAN Isoform 2 of Serine/arginine repetitive matrix protein 1 OS=Homo sapiens GN=SRRM1;>sp|Q8IYB3|SRRM1_HUMAN Serine/argin	4893600	4220200	3968200	4255400	5943600	15235000	9736300	17003000	12428000	10846000	4143500	5729500	9059600	5280300	8812700	1	8624000	8346200	7304300	8003700	11513000	11938000	3363100	6196600
M0R0C3;M0R2F8;Q3ZCQ8-3;Q3ZCQ8;Q3ZCQ8-2;M0R1Y4;M0R003	Mitochondrial import inner membrane translocase subunit TIM50	TIMM50	>tr|M0R0C3|M0R0C3_HUMAN Mitochondrial import inner membrane translocase subunit TIM50 (Fragment) OS=Homo sapiens GN=TIMM50 PE=4 SV=1;>tr|M0R2F8|M0R2F8_HUMAN Mitochondrial import inner membrane translocase subunit TIM50 OS=Homo sapiens GN=TIMM50 PE=4 SV=2;>	9358600	18114000	34960000	36841000	20713000	22217000	53939000	63768000	36712000	35731000	29436000	35220000	71591000	77313000	42912000	31032000	38481000	70682000	57224000	40815000	20133000	20944000	23616000	41941000
M0R0F0;P46782;M0R0R2;M0QZN2	40S ribosomal protein S5;40S ribosomal protein S5, N-terminally processed	RPS5	>tr|M0R0F0|M0R0F0_HUMAN 40S ribosomal protein S5 (Fragment) OS=Homo sapiens GN=RPS5 PE=2 SV=1;>sp|P46782|RS5_HUMAN 40S ribosomal protein S5 OS=Homo sapiens GN=RPS5 PE=1 SV=4;>tr|M0R0R2|M0R0R2_HUMAN 40S ribosomal protein S5 OS=Homo sapiens GN=RPS5 PE=2 SV=1	461890000	302980000	128230000	135630000	380400000	356510000	525310000	533650000	435180000	353080000	432230000	423110000	533040000	568420000	758870000	747800000	646460000	716500000	496670000	582880000	816780000	849940000	800510000	816080000
M0R3B2;Q9Y314;M0QX85;M0R1K2	Nitric oxide synthase-interacting protein	NOSIP	>tr|M0R3B2|M0R3B2_HUMAN Nitric oxide synthase-interacting protein (Fragment) OS=Homo sapiens GN=NOSIP PE=2 SV=2;>sp|Q9Y314|NOSIP_HUMAN Nitric oxide synthase-interacting protein OS=Homo sapiens GN=NOSIP PE=1 SV=1;>tr|M0QX85|M0QX85_HUMAN Nitric oxide synthas	25425000	31252000	1	9982800	20036000	23151000	17434000	23306000	20576000	27396000	16860000	17267000	10786000	12525000	1	1	12003000	12686000	12934000	19009000	1	1	12618000	15587000
M0R3D6;M0R1A7;Q02543;M0R117;M0R0P7	60S ribosomal protein L18a	RPL18A	>tr|M0R3D6|M0R3D6_HUMAN 60S ribosomal protein L18a (Fragment) OS=Homo sapiens GN=RPL18A PE=3 SV=1;>tr|M0R1A7|M0R1A7_HUMAN 60S ribosomal protein L18a OS=Homo sapiens GN=RPL18A PE=3 SV=1;>sp|Q02543|RL18A_HUMAN 60S ribosomal protein L18a OS=Homo sapiens GN=RP	499970000	449260000	204880000	228780000	379960000	407900000	485160000	445970000	312980000	315410000	383120000	365160000	428360000	433980000	413270000	291540000	371010000	391750000	243860000	270450000	349620000	374970000	299760000	316590000
M0R3F1;Q9BUJ2-4;B7Z4B8;Q9BUJ2-2;Q9BUJ2;M0QYZ0;Q9BUJ2-3;M0QYM5;M0QYI8	Heterogeneous nuclear ribonucleoprotein U-like protein 1	HNRNPUL1	>tr|M0R3F1|M0R3F1_HUMAN Heterogeneous nuclear ribonucleoprotein U-like protein 1 (Fragment) OS=Homo sapiens GN=HNRNPUL1 PE=4 SV=1;>sp|Q9BUJ2-4|HNRL1_HUMAN Isoform 4 of Heterogeneous nuclear ribonucleoprotein U-like protein 1 OS=Homo sapiens GN=HNRNPUL1;>tr	19580000	17371000	15334000	16486000	17736000	21093000	15354000	18597000	12555000	15513000	15681000	19034000	15491000	14732000	18611000	13913000	8879900	15079000	18584000	20637000	1	1	13231000	14861000
O00139-2;O00139-1;O00139-5;O00139;O00139-4;D6R9M0	Kinesin-like protein KIF2A	KIF2A	>sp|O00139-2|KIF2A_HUMAN Isoform 2 of Kinesin-like protein KIF2A OS=Homo sapiens GN=KIF2A;>sp|O00139-1|KIF2A_HUMAN Isoform 1 of Kinesin-like protein KIF2A OS=Homo sapiens GN=KIF2A;>sp|O00139-5|KIF2A_HUMAN Isoform 5 of Kinesin-like protein KIF2A OS=Homo sap	28160000	21941000	10107000	10404000	20191000	22728000	20780000	18480000	22629000	11536000	11397000	23098000	15077000	8247200	10439000	6080400	10891000	6635500	16899000	14726000	14117000	9236500	13358000	10294000
O00165-5;O00165-3;O00165;O00165-2;E9PIQ7;O00165-4;Q5VYD6	HCLS1-associated protein X-1	HAX1	>sp|O00165-5|HAX1_HUMAN Isoform 5 of HCLS1-associated protein X-1 OS=Homo sapiens GN=HAX1;>sp|O00165-3|HAX1_HUMAN Isoform 3 of HCLS1-associated protein X-1 OS=Homo sapiens GN=HAX1;>sp|O00165|HAX1_HUMAN HCLS1-associated protein X-1 OS=Homo sapiens GN=HAX1 P	1	1718300	1	1	1	6840300	37267000	32972000	17005000	25026000	35358000	21690000	52500000	31001000	48587000	42419000	34721000	24811000	36606000	25854000	19397000	49138000	27067000	27754000
O00203;O00203-3;H0YBD0;F5GYB0;F5GWU4	AP-3 complex subunit beta-1	AP3B1	>sp|O00203|AP3B1_HUMAN AP-3 complex subunit beta-1 OS=Homo sapiens GN=AP3B1 PE=1 SV=3;>sp|O00203-3|AP3B1_HUMAN Isoform 2 of AP-3 complex subunit beta-1 OS=Homo sapiens GN=AP3B1	11136000	22653000	30740000	33058000	17498000	23011000	210600000	208620000	126330000	126700000	131460000	156610000	197380000	201410000	129790000	139260000	144280000	118410000	237180000	203180000	154280000	175410000	271950000	236570000
O00231;O00231-2;J3QRY4;J3QS13;J3KSW3	26S proteasome non-ATPase regulatory subunit 11	PSMD11	>sp|O00231|PSD11_HUMAN 26S proteasome non-ATPase regulatory subunit 11 OS=Homo sapiens GN=PSMD11 PE=1 SV=3;>sp|O00231-2|PSD11_HUMAN Isoform 2 of 26S proteasome non-ATPase regulatory subunit 11 OS=Homo sapiens GN=PSMD11	175090000	191870000	192440000	168080000	201150000	179620000	191000000	205680000	201760000	188240000	181240000	179840000	158900000	184150000	170020000	197440000	171880000	198440000	168310000	166040000	213780000	179370000	174130000	201960000
O00232;O00232-2	26S proteasome non-ATPase regulatory subunit 12	PSMD12	>sp|O00232|PSD12_HUMAN 26S proteasome non-ATPase regulatory subunit 12 OS=Homo sapiens GN=PSMD12 PE=1 SV=3;>sp|O00232-2|PSD12_HUMAN Isoform 2 of 26S proteasome non-ATPase regulatory subunit 12 OS=Homo sapiens GN=PSMD12	30797000	76177000	45029000	30565000	87668000	94620000	85286000	79411000	86425000	103500000	148240000	133020000	82221000	73088000	82657000	109410000	104370000	133630000	72062000	69571000	105620000	91199000	98278000	107400000
O00264;O00264-2;U3KQM0	Membrane-associated progesterone receptor component 1	PGRMC1	>sp|O00264|PGRC1_HUMAN Membrane-associated progesterone receptor component 1 OS=Homo sapiens GN=PGRMC1 PE=1 SV=3;>sp|O00264-2|PGRC1_HUMAN Isoform 2 of Membrane-associated progesterone receptor component 1 OS=Homo sapiens GN=PGRMC1	23724000	26739000	44708000	30393000	30505000	33633000	92632000	97019000	42423000	42083000	39902000	50352000	117760000	163230000	115860000	182660000	124200000	99640000	86386000	61655000	124310000	118500000	71353000	59231000
O00268;V9GY03;V9GY14	Transcription initiation factor TFIID subunit 4	TAF4	>sp|O00268|TAF4_HUMAN Transcription initiation factor TFIID subunit 4 OS=Homo sapiens GN=TAF4 PE=1 SV=2	53166000	44551000	1	2279000	28668000	45282000	17584000	15397000	9265700	16363000	10850000	8214100	3171300	3535800	1	4455300	1	4001600	6596300	4346300	11362000	12700000	11384000	5250900
O00299	Chloride intracellular channel protein 1	CLIC1	>sp|O00299|CLIC1_HUMAN Chloride intracellular channel protein 1 OS=Homo sapiens GN=CLIC1 PE=1 SV=4	6307100	7123200	8352500	10008000	9264300	8503500	6601400	6641200	20062000	18940000	20523000	13275000	9748000	10414000	6170500	6930600	13569000	17603000	8024600	4854800	1	1	9034400	8055200
O00303;B3KSH1;B4DEW9;H0YDT6;E9PQV8	Eukaryotic translation initiation factor 3 subunit F	EIF3F	>sp|O00303|EIF3F_HUMAN Eukaryotic translation initiation factor 3 subunit F OS=Homo sapiens GN=EIF3F PE=1 SV=1;>tr|B3KSH1|B3KSH1_HUMAN Eukaryotic translation initiation factor 3 subunit F OS=Homo sapiens GN=EIF3F PE=2 SV=1;>tr|B4DEW9|B4DEW9_HUMAN Eukaryoti	211600000	237080000	402790000	254540000	251050000	276700000	195200000	225810000	182930000	186930000	181650000	227250000	164340000	169060000	106940000	29401000	199950000	160250000	154960000	125340000	224290000	168320000	172300000	180420000
O00410;O00410-3;H0Y8C6;B4E0R6;O00410-2;E7ETV3;E7EQT5;C9JMV5;E7EV12;H0Y3V4;E7EWK4;E7EX05;C9JZD8;C9JQT6;E7ESA1;E7ESZ1;E7ETV8;C9JZ53;C9J875;C9JXE0	Importin-5	IPO5	>sp|O00410|IPO5_HUMAN Importin-5 OS=Homo sapiens GN=IPO5 PE=1 SV=4;>sp|O00410-3|IPO5_HUMAN Isoform 3 of Importin-5 OS=Homo sapiens GN=IPO5;>tr|H0Y8C6|H0Y8C6_HUMAN Importin-5 (Fragment) OS=Homo sapiens GN=IPO5 PE=4 SV=1;>tr|B4E0R6|B4E0R6_HUMAN Importin-5 OS	7197600	4533900	3771900	7793300	5347300	7667200	1085800000	1007700000	393330000	461840000	1005800000	981610000	6684000000	7093200000	8410800000	9288900000	7498000000	7890500000	2285800000	2898400000	4620300000	4310500000	3198100000	3452500000
O00422;H7BZW6;U3KPY7;U3KQ12	Histone deacetylase complex subunit SAP18	SAP18	>sp|O00422|SAP18_HUMAN Histone deacetylase complex subunit SAP18 OS=Homo sapiens GN=SAP18 PE=1 SV=1;>tr|H7BZW6|H7BZW6_HUMAN Histone deacetylase complex subunit SAP18 (Fragment) OS=Homo sapiens GN=SAP18 PE=4 SV=2	65139000	38109000	3265500	2719100	33858000	41918000	53397000	46360000	40048000	48046000	34242000	28296000	31794000	23135000	13350000	12858000	13331000	15968000	100360000	108060000	18676000	16882000	42288000	36330000
O00425;O00425-2	Insulin-like growth factor 2 mRNA-binding protein 3	IGF2BP3	>sp|O00425|IF2B3_HUMAN Insulin-like growth factor 2 mRNA-binding protein 3 OS=Homo sapiens GN=IGF2BP3 PE=1 SV=2;>sp|O00425-2|IF2B3_HUMAN Isoform 2 of Insulin-like growth factor 2 mRNA-binding protein 3 OS=Homo sapiens GN=IGF2BP3	19877000	16778000	1	23607000	18261000	12363000	9518300	8115800	8839600	4266300	5663800	8936600	9123800	9323000	1	1	7000300	1	4080000	4730500	1	4968500	1	1
O00461;F8W785	Golgi integral membrane protein 4	GOLIM4	>sp|O00461|GOLI4_HUMAN Golgi integral membrane protein 4 OS=Homo sapiens GN=GOLIM4 PE=1 SV=1;>tr|F8W785|F8W785_HUMAN Golgi integral membrane protein 4 OS=Homo sapiens GN=GOLIM4 PE=2 SV=1	1	1	1	1	1	1	4851300	1	1	1	1	1	4417200	5527500	4680300	4504600	4977900	1	8475300	7199800	9445600	9255400	12133000	7609900
O00483	NADH dehydrogenase [ubiquinone] 1 alpha subcomplex subunit 4	NDUFA4	>sp|O00483|NDUA4_HUMAN NADH dehydrogenase [ubiquinone] 1 alpha subcomplex subunit 4 OS=Homo sapiens GN=NDUFA4 PE=1 SV=1	13925000	26390000	33405000	42149000	19187000	17527000	29600000	28642000	23103000	22805000	21910000	21456000	36652000	31350000	44368000	42307000	34336000	44765000	20076000	26316000	1	1	27571000	35680000
O00487	26S proteasome non-ATPase regulatory subunit 14	PSMD14	>sp|O00487|PSDE_HUMAN 26S proteasome non-ATPase regulatory subunit 14 OS=Homo sapiens GN=PSMD14 PE=1 SV=1	62993000	91289000	57582000	52212000	71097000	82630000	77549000	74786000	65365000	85482000	85333000	92299000	60821000	67506000	44926000	47015000	69582000	61363000	68432000	57516000	48486000	57670000	59213000	53337000
O00505;H7C4F6;O00629	Importin subunit alpha-4	KPNA3	>sp|O00505|IMA4_HUMAN Importin subunit alpha-4 OS=Homo sapiens GN=KPNA3 PE=1 SV=2	1	7687700	7679200	1	8087600	5633900	11528000	11597000	8739300	8023200	18362000	10954000	9328900	7419100	5036800	1	4842200	1	11531000	7824600	1	1	4034800	4039900
O00571;O00571-2;B4DXX7;O15523;B4E3C4;B4DLA0;C9J8G5;C9J081;D6RCM4;Q9NQI0-3;Q9NQI0-2;Q9NQI0-4;Q9NQI0	ATP-dependent RNA helicase DDX3X;ATP-dependent RNA helicase DDX3Y	DDX3X;DDX3Y	>sp|O00571|DDX3X_HUMAN ATP-dependent RNA helicase DDX3X OS=Homo sapiens GN=DDX3X PE=1 SV=3;>sp|O00571-2|DDX3X_HUMAN Isoform 2 of ATP-dependent RNA helicase DDX3X OS=Homo sapiens GN=DDX3X;>tr|B4DXX7|B4DXX7_HUMAN Uncharacterized protein OS=Homo sapiens GN=DD	627670000	538310000	187050000	212760000	624760000	657450000	389550000	370530000	455930000	485820000	376920000	391330000	233640000	234510000	192360000	232610000	246090000	231510000	397780000	385290000	297480000	205980000	319750000	325940000
O00743;O00743-2;O00743-3;B7Z3E2;Q5T1S7	Serine/threonine-protein phosphatase 6 catalytic subunit	PPP6C	>sp|O00743|PPP6_HUMAN Serine/threonine-protein phosphatase 6 catalytic subunit OS=Homo sapiens GN=PPP6C PE=1 SV=1;>sp|O00743-2|PPP6_HUMAN Isoform 2 of Serine/threonine-protein phosphatase 6 catalytic subunit OS=Homo sapiens GN=PPP6C;>sp|O00743-3|PPP6_HUMAN	22874000	11549000	22313000	38345000	34517000	17557000	118570000	99556000	75614000	139910000	106390000	75736000	305050000	311840000	319690000	364610000	292170000	256960000	226630000	113670000	300830000	371100000	295810000	368940000
O00767	Acyl-CoA desaturase	SCD	>sp|O00767|ACOD_HUMAN Acyl-CoA desaturase OS=Homo sapiens GN=SCD PE=1 SV=2	13375000	20638000	1	1	1	1	14025000	1	1	1	22894000	14377000	28333000	1	32061000	33950000	1	26835000	21149000	1	56416000	60689000	1	1
O14579-2;O14579;M0QXB4;M0R061;O14579-3	Coatomer subunit epsilon	COPE	>sp|O14579-2|COPE_HUMAN Isoform 2 of Coatomer subunit epsilon OS=Homo sapiens GN=COPE;>sp|O14579|COPE_HUMAN Coatomer subunit epsilon OS=Homo sapiens GN=COPE PE=1 SV=3;>tr|M0QXB4|M0QXB4_HUMAN Coatomer protein complex, subunit epsilon, isoform CRA_g OS=Homo	7247200	7513700	1	9107100	8233500	9377500	17227000	13328000	8844600	8988900	7220500	9029700	13890000	1	7522600	5294800	8352400	13203000	7188900	6614100	8710600	10067000	8993400	7040700
O14617-3;E7EMM2;O14617-4;O14617-2;G5E988;O14617;O14617-5;K7ELX8	AP-3 complex subunit delta-1	AP3D1	>sp|O14617-3|AP3D1_HUMAN Isoform 3 of AP-3 complex subunit delta-1 OS=Homo sapiens GN=AP3D1;>tr|E7EMM2|E7EMM2_HUMAN AP-3 complex subunit delta-1 OS=Homo sapiens GN=AP3D1 PE=2 SV=1;>sp|O14617-4|AP3D1_HUMAN Isoform 4 of AP-3 complex subunit delta-1 OS=Homo s	8207300	8935300	1	6295600	10040000	7047800	11896000	13934000	17360000	7411800	8369500	11017000	11881000	7054700	1	9256400	8630500	11411000	11066000	10182000	1	6125000	8713400	11369000
O14639-4;O14639-3;O14639-5;J3QSX6;Q5JVV3;O14639-2;F8W8M4;O14639;Q5T6N4;H0Y3K7;Q5T6N2	Actin-binding LIM protein 1	ABLIM1	>sp|O14639-4|ABLM1_HUMAN Isoform 4 of Actin-binding LIM protein 1 OS=Homo sapiens GN=ABLIM1;>sp|O14639-3|ABLM1_HUMAN Isoform 3 of Actin-binding LIM protein 1 OS=Homo sapiens GN=ABLIM1;>sp|O14639-5|ABLM1_HUMAN Isoform 5 of Actin-binding LIM protein 1 OS=Hom	29123000	9905300	1	1	22028000	7638700	5942900	5181700	5863600	7385100	1	1	1536100	1666400	1	1	1	1	3843300	2898400	1	1	1	6017500
O14646-2;O14646;O14647-2;O14647;H0YJG4;H3BTW3;Q8TD26;Q9P2D1	Chromodomain-helicase-DNA-binding protein 1	CHD1	>sp|O14646-2|CHD1_HUMAN Isoform 2 of Chromodomain-helicase-DNA-binding protein 1 OS=Homo sapiens GN=CHD1;>sp|O14646|CHD1_HUMAN Chromodomain-helicase-DNA-binding protein 1 OS=Homo sapiens GN=CHD1 PE=1 SV=2	18771000	21769000	9819500	10810000	17475000	15712000	20497000	32562000	15849000	14554000	11709000	16979000	14364000	15284000	14874000	11261000	11036000	13915000	34925000	27426000	18677000	22852000	14993000	15093000
O14654	Insulin receptor substrate 4	IRS4	>sp|O14654|IRS4_HUMAN Insulin receptor substrate 4 OS=Homo sapiens GN=IRS4 PE=1 SV=1	412980000	400000000	8133300	16762000	350120000	347110000	381140000	387440000	281850000	335770000	310180000	304590000	363230000	369770000	325700000	307400000	290940000	303390000	470000000	470940000	425180000	367050000	467400000	477850000
O14735-3;O14735;B3KY94;H3BUR9	CDP-diacylglycerol--inositol 3-phosphatidyltransferase	CDIPT	>sp|O14735-3|CDIPT_HUMAN Isoform 3 of CDP-diacylglycerol--inositol 3-phosphatidyltransferase OS=Homo sapiens GN=CDIPT;>sp|O14735|CDIPT_HUMAN CDP-diacylglycerol--inositol 3-phosphatidyltransferase OS=Homo sapiens GN=CDIPT PE=1 SV=1;>tr|B3KY94|B3KY94_HUMAN C	1	3257200	1	1	1	1	17429000	6656400	1	3235800	6933900	10632000	24905000	27184000	13114000	25366000	20162000	29987000	7715100	19354000	33225000	1	28845000	14900000
O14737;K7EQA1;B4DE64;K7ESJ4;Q3HM38	Programmed cell death protein 5	PDCD5	>sp|O14737|PDCD5_HUMAN Programmed cell death protein 5 OS=Homo sapiens GN=PDCD5 PE=1 SV=3;>tr|K7EQA1|K7EQA1_HUMAN Programmed cell death protein 5 OS=Homo sapiens GN=PDCD5 PE=2 SV=1;>tr|B4DE64|B4DE64_HUMAN Programmed cell death protein 5 OS=Homo sapiens GN=	15777000	17731000	98796000	111540000	29899000	47035000	29859000	31321000	43830000	46056000	31837000	31178000	22332000	22194000	17268000	26943000	52995000	49340000	9761400	14669000	2634900	10960000	44038000	38259000
O14744;O14744-2;O14744-4;G3V580;G3V5L5;G3V2L6;C9JSX3;G3V2X6	Protein arginine N-methyltransferase 5;Protein arginine N-methyltransferase 5, N-terminally processed	PRMT5	>sp|O14744|ANM5_HUMAN Protein arginine N-methyltransferase 5 OS=Homo sapiens GN=PRMT5 PE=1 SV=4;>sp|O14744-2|ANM5_HUMAN Isoform 2 of Protein arginine N-methyltransferase 5 OS=Homo sapiens GN=PRMT5;>sp|O14744-4|ANM5_HUMAN Isoform 4 of Protein arginine N-met	20898000000	21665000000	3727000000	4241100000	15248000000	15347000000	6121200000	6339400000	6319900000	6593100000	6656300000	6891100000	3853100000	3794900000	3634800000	4418500000	3166200000	3490700000	4224200000	5199100000	4571500000	4370400000	4381300000	4359300000
O14744-5;G3V5W5;O14744-3;B4DV00;H0YJX6;H7BZ44;H0YJD3;H0YJ77;G3V507;G3V2F5;H0YJY6;G3V5T6	Protein arginine N-methyltransferase 5;Protein arginine N-methyltransferase 5, N-terminally processed	PRMT5	>sp|O14744-5|ANM5_HUMAN Isoform 5 of Protein arginine N-methyltransferase 5 OS=Homo sapiens GN=PRMT5;>tr|G3V5W5|G3V5W5_HUMAN Protein arginine N-methyltransferase 5 OS=Homo sapiens GN=PRMT5 PE=2 SV=1;>sp|O14744-3|ANM5_HUMAN Isoform 3 of Protein arginine N-m	63797000	42199000	1	1	43858000	43963000	14326000	20235000	20633000	16531000	20815000	24300000	9948500	12422000	1	13076000	1	1	12623000	13237000	1	1	9586800	14148000
O14773-2;O14773	Tripeptidyl-peptidase 1	TPP1	>sp|O14773-2|TPP1_HUMAN Isoform 2 of Tripeptidyl-peptidase 1 OS=Homo sapiens GN=TPP1;>sp|O14773|TPP1_HUMAN Tripeptidyl-peptidase 1 OS=Homo sapiens GN=TPP1 PE=1 SV=2	1	1	4405000	1	1	1	4037100	1	1	1	1	1	1	4905000	1	1	3912900	1	1	1	1	1	3791900	4470400
O14787-2;O14787	Transportin-2	TNPO2	>sp|O14787-2|TNPO2_HUMAN Isoform 2 of Transportin-2 OS=Homo sapiens GN=TNPO2;>sp|O14787|TNPO2_HUMAN Transportin-2 OS=Homo sapiens GN=TNPO2 PE=1 SV=3	1	1	1	1	1	1	10023000	11092000	3787900	3937100	4053000	6682800	66921000	71154000	113260000	114170000	59151000	78979000	30162000	19310000	63379000	60873000	37554000	26638000
O14828-2;O14828	Secretory carrier-associated membrane protein 3	SCAMP3	>sp|O14828-2|SCAM3_HUMAN Isoform 2 of Secretory carrier-associated membrane protein 3 OS=Homo sapiens GN=SCAMP3;>sp|O14828|SCAM3_HUMAN Secretory carrier-associated membrane protein 3 OS=Homo sapiens GN=SCAMP3 PE=1 SV=3	1	4035400	1	5870600	1	5548100	11858000	1	1	6807800	18852000	7117000	10218000	9143300	14220000	19008000	14621000	1	13714000	8157200	27202000	30339000	9050100	8135100
O14880;Q5VV89;Q5VV87	Microsomal glutathione S-transferase 3	MGST3	>sp|O14880|MGST3_HUMAN Microsomal glutathione S-transferase 3 OS=Homo sapiens GN=MGST3 PE=1 SV=1;>tr|Q5VV89|Q5VV89_HUMAN Microsomal glutathione S-transferase 3 OS=Homo sapiens GN=MGST3 PE=4 SV=1	2767700	1	1	1	1	2338400	34340000	28622000	14584000	10492000	19051000	24520000	58229000	71361000	62825000	57394000	28637000	17506000	52061000	48219000	77087000	73537000	44340000	43768000
O14893-2;O14893;O14893-3;H0YDP6;H0YEL0;G5EA29	Gem-associated protein 2	GEMIN2	>sp|O14893-2|GEMI2_HUMAN Isoform 2 of Gem-associated protein 2 OS=Homo sapiens GN=GEMIN2;>sp|O14893|GEMI2_HUMAN Gem-associated protein 2 OS=Homo sapiens GN=GEMIN2 PE=1 SV=1;>sp|O14893-3|GEMI2_HUMAN Isoform 3 of Gem-associated protein 2 OS=Homo sapiens GN=G	12667000	12083000	1	1	13312000	11711000	122620000	119830000	69039000	57593000	71034000	79128000	104680000	102410000	62804000	73658000	72738000	81975000	100500000	92534000	70890000	71891000	97688000	105900000
O14925;Q5SRD1;S4R2X5;E7EP42;E9PB91;B1APJ0	Mitochondrial import inner membrane translocase subunit Tim23;Putative mitochondrial import inner membrane translocase subunit Tim23B	TIMM23;TIMM23B	>sp|O14925|TIM23_HUMAN Mitochondrial import inner membrane translocase subunit Tim23 OS=Homo sapiens GN=TIMM23 PE=1 SV=1;>sp|Q5SRD1|TI23B_HUMAN Putative mitochondrial import inner membrane translocase subunit Tim23B OS=Homo sapiens GN=TIMM23B PE=5 SV=2;>tr	1	8628700	1	1	16322000	9777900	13404000	13353000	21874000	16023000	17114000	25335000	50085000	32849000	1	1	9001400	25010000	31658000	17860000	1	1	1	24448000
O14929;O14929-2	Histone acetyltransferase type B catalytic subunit	HAT1	>sp|O14929|HAT1_HUMAN Histone acetyltransferase type B catalytic subunit OS=Homo sapiens GN=HAT1 PE=1 SV=1;>sp|O14929-2|HAT1_HUMAN Isoform B of Histone acetyltransferase type B catalytic subunit OS=Homo sapiens GN=HAT1	11441000	8065600	15429000	16837000	15155000	26365000	13987000	19452000	16734000	27594000	21237000	22066000	23048000	17325000	17789000	15566000	35834000	25273000	12337000	9851000	11081000	10221000	11255000	14999000
O14949	Cytochrome b-c1 complex subunit 8	UQCRQ	>sp|O14949|QCR8_HUMAN Cytochrome b-c1 complex subunit 8 OS=Homo sapiens GN=UQCRQ PE=1 SV=4	4446000	10674000	1	4931600	9860200	9562500	23452000	39450000	18690000	13901000	20201000	19402000	45042000	57208000	64393000	48034000	51287000	41520000	28915000	46206000	47166000	65977000	52291000	48191000
O14974-5;O14974-4;O14974-3;O14974;F8VW28;H0YIM2;H0YHL8;H0YIS3;F8VZN8;O14974-2	Protein phosphatase 1 regulatory subunit 12A	PPP1R12A	>sp|O14974-5|MYPT1_HUMAN Isoform 5 of Protein phosphatase 1 regulatory subunit 12A OS=Homo sapiens GN=PPP1R12A;>sp|O14974-4|MYPT1_HUMAN Isoform 4 of Protein phosphatase 1 regulatory subunit 12A OS=Homo sapiens GN=PPP1R12A;>sp|O14974-3|MYPT1_HUMAN Isoform 3	8549600	8256400	9105400	9215600	8361200	7915900	1	9030800	9025200	11320000	11621000	9617800	11938000	13525000	15575000	1	13685000	1	12063000	13692000	12676000	15970000	12802000	15444000
O14979-3;O14979-2;O14979	Heterogeneous nuclear ribonucleoprotein D-like	HNRPDL	>sp|O14979-3|HNRDL_HUMAN Isoform 3 of Heterogeneous nuclear ribonucleoprotein D-like OS=Homo sapiens GN=HNRNPDL;>sp|O14979-2|HNRDL_HUMAN Isoform 2 of Heterogeneous nuclear ribonucleoprotein D-like OS=Homo sapiens GN=HNRNPDL;>sp|O14979|HNRDL_HUMAN Heterogen	53291000	88691000	1	1	59383000	59511000	70498000	71055000	52694000	70885000	57499000	56604000	46953000	46488000	48376000	70157000	65279000	73644000	39365000	85643000	121210000	57737000	84144000	55895000
O14980;C9JKM9;C9J673;C9IZS4;C9JQ02;C9JV99;F8WF71;C9IYM2;H7BZC5;C9JF49	Exportin-1	XPO1	>sp|O14980|XPO1_HUMAN Exportin-1 OS=Homo sapiens GN=XPO1 PE=1 SV=1	18609000	9402700	43687000	21566000	21646000	32100000	243290000	281770000	199820000	204360000	221160000	249010000	638140000	825030000	932930000	880580000	698330000	780140000	331360000	277420000	703370000	543760000	487860000	441970000
O14981;B4E0W6	TATA-binding protein-associated factor 172	BTAF1	>sp|O14981|BTAF1_HUMAN TATA-binding protein-associated factor 172 OS=Homo sapiens GN=BTAF1 PE=1 SV=2;>tr|B4E0W6|B4E0W6_HUMAN TATA-binding protein-associated factor 172 OS=Homo sapiens GN=BTAF1 PE=2 SV=1	1	6782900	1	1	1	1	1	4701000	1	1	7179400	6526200	9465600	1	14521000	1	5966400	11239000	10342000	1	8531700	7088500	1	1
O15042-2;O15042;E7ET15;O15042-3;C9JB80;H0Y8D9;E7EW00;H7C4V2;C9JDJ7;C9J5L1	U2 snRNP-associated SURP motif-containing protein	U2SURP	>sp|O15042-2|SR140_HUMAN Isoform 2 of U2 snRNP-associated SURP motif-containing protein OS=Homo sapiens GN=U2SURP;>sp|O15042|SR140_HUMAN U2 snRNP-associated SURP motif-containing protein OS=Homo sapiens GN=U2SURP PE=1 SV=2;>tr|E7ET15|E7ET15_HUMAN U2 snRNP-	446560000	384630000	1	28496000	333910000	334750000	177790000	144770000	151170000	148610000	160880000	148610000	87877000	97661000	70248000	56830000	65913000	64511000	91130000	122630000	86984000	102710000	89695000	157800000
O15144;H7C3F9;G5E9S7;C9JTV5;G5E9J0	Actin-related protein 2/3 complex subunit 2	ARPC2	>sp|O15144|ARPC2_HUMAN Actin-related protein 2/3 complex subunit 2 OS=Homo sapiens GN=ARPC2 PE=1 SV=1	17624000	28805000	12574000	14514000	76691000	71331000	7618800	9679400	9569400	12695000	17817000	14857000	1	3806800	4959400	6629400	5962100	7293200	8140100	8325100	9032300	1	6788400	5687900
O15145;F8VR50;C9JZD1	Actin-related protein 2/3 complex subunit 3	ARPC3	>sp|O15145|ARPC3_HUMAN Actin-related protein 2/3 complex subunit 3 OS=Homo sapiens GN=ARPC3 PE=1 SV=3;>tr|F8VR50|F8VR50_HUMAN Actin-related protein 2/3 complex subunit 3 (Fragment) OS=Homo sapiens GN=ARPC3 PE=2 SV=1;>tr|C9JZD1|C9JZD1_HUMAN Actin-related pr	35954000	37492000	1	11772000	35495000	44949000	1	7160500	12316000	15461000	7671900	7559500	3779400	1	1	1	1	1	4652300	5851200	1	1	12651000	1
O15173;O15173-2	Membrane-associated progesterone receptor component 2	PGRMC2	>sp|O15173|PGRC2_HUMAN Membrane-associated progesterone receptor component 2 OS=Homo sapiens GN=PGRMC2 PE=1 SV=1;>sp|O15173-2|PGRC2_HUMAN Isoform 2 of Membrane-associated progesterone receptor component 2 OS=Homo sapiens GN=PGRMC2	2371800	2520900	3119300	5593700	3721600	3443600	3604500	4749100	4283300	1	5906800	1	1	5394300	1	3695400	7725300	4057500	1	4795400	1	1	4002300	4153900
O15212;A2AB88	Prefoldin subunit 6	PFDN6	>sp|O15212|PFD6_HUMAN Prefoldin subunit 6 OS=Homo sapiens GN=PFDN6 PE=1 SV=1;>tr|A2AB88|A2AB88_HUMAN Prefoldin subunit 6 OS=Homo sapiens GN=PFDN6 PE=2 SV=1	3757500	3440700	7824800	7299300	3932300	3836400	4736400	4035500	4316600	4417900	3812800	3802300	1	1	1	1	5491400	3849200	3139500	3223000	4297100	4421900	3949000	4791000
O15258;Q5T092;Q5T091;Q5T093	Protein RER1	RER1	>sp|O15258|RER1_HUMAN Protein RER1 OS=Homo sapiens GN=RER1 PE=1 SV=1;>tr|Q5T092|Q5T092_HUMAN Protein RER1 (Fragment) OS=Homo sapiens GN=RER1 PE=2 SV=1;>tr|Q5T091|Q5T091_HUMAN Protein RER1 OS=Homo sapiens GN=RER1 PE=4 SV=1;>tr|Q5T093|Q5T093_HUMAN Protein RE	1	11417000	1	1	9108500	1	9200400	6154400	1	1	1	15589000	25183000	29598000	15092000	14234000	10300000	8061900	19536000	18955000	1	40846000	15059000	15240000
O15260-2;Q5T8U5;O15260;O15260-3	Surfeit locus protein 4	SURF4	>sp|O15260-2|SURF4_HUMAN Isoform 2 of Surfeit locus protein 4 OS=Homo sapiens GN=SURF4;>tr|Q5T8U5|Q5T8U5_HUMAN Surfeit 4 OS=Homo sapiens GN=SURF4 PE=4 SV=1;>sp|O15260|SURF4_HUMAN Surfeit locus protein 4 OS=Homo sapiens GN=SURF4 PE=1 SV=3;>sp|O15260-3|SURF4	10859000	8970800	1	1	9429000	12304000	25915000	24035000	31319000	12632000	28182000	16001000	79830000	75685000	56749000	68037000	65250000	51901000	32983000	29725000	42827000	33224000	31708000	37610000
O15269;O15269-2	Serine palmitoyltransferase 1	SPTLC1	>sp|O15269|SPTC1_HUMAN Serine palmitoyltransferase 1 OS=Homo sapiens GN=SPTLC1 PE=1 SV=1	5473500	4718700	1	7381800	6715700	8591700	6568000	7319300	4825400	6822100	5885800	9182300	10287000	17880000	10647000	11036000	25391000	21087000	7500000	8020100	9869600	7600200	14202000	10151000
O15294;O15294-3;O15294-2;O15294-4;C9JZL3	UDP-N-acetylglucosamine--peptide N-acetylglucosaminyltransferase 110 kDa subunit	OGT	>sp|O15294|OGT1_HUMAN UDP-N-acetylglucosamine--peptide N-acetylglucosaminyltransferase 110 kDa subunit OS=Homo sapiens GN=OGT PE=1 SV=3;>sp|O15294-3|OGT1_HUMAN Isoform 1 of UDP-N-acetylglucosamine--peptide N-acetylglucosaminyltransferase 110 kDa subunit OS	99905000	82645000	1	1	113770000	117610000	34505000	25412000	48405000	46297000	28694000	26874000	16123000	13717000	6644300	6212100	16943000	11270000	19809000	25817000	9396100	8343400	12841000	19077000
O15355	Protein phosphatase 1G	PPM1G	>sp|O15355|PPM1G_HUMAN Protein phosphatase 1G OS=Homo sapiens GN=PPM1G PE=1 SV=1	10580000	4336600	8180800	5376600	12347000	4056700	282600000	282380000	143370000	113890000	142180000	156040000	396920000	429700000	482610000	586020000	346740000	383140000	302370000	366470000	573310000	533060000	368450000	365780000
O15372;B3KS98;E5RJT0;E5RFH0;E5RGU4;E5RFW7;E5RHC7;E5RH59	Eukaryotic translation initiation factor 3 subunit H	EIF3H;EIF3S3	>sp|O15372|EIF3H_HUMAN Eukaryotic translation initiation factor 3 subunit H OS=Homo sapiens GN=EIF3H PE=1 SV=1;>tr|B3KS98|B3KS98_HUMAN Eukaryotic translation initiation factor 3 subunit H OS=Homo sapiens GN=EIF3S3 PE=2 SV=1;>tr|E5RJT0|E5RJT0_HUMAN Eukaryot	203030000	231140000	506740000	307620000	239570000	236960000	178940000	202850000	190360000	211840000	182040000	165030000	101690000	113210000	87141000	97105000	130690000	112240000	132010000	122980000	127580000	92379000	123480000	128090000
O15397;O15397-2;F5H244;F5H2I3;F5GXT5;H0YH64;F5H292	Importin-8	IPO8	>sp|O15397|IPO8_HUMAN Importin-8 OS=Homo sapiens GN=IPO8 PE=1 SV=2;>sp|O15397-2|IPO8_HUMAN Isoform 2 of Importin-8 OS=Homo sapiens GN=IPO8	307880000	352770000	3358500	16011000	297980000	247760000	1525200000	1553100000	745050000	845960000	1247000000	1060000000	2020100000	2216400000	1916300000	2160800000	1959300000	1911000000	1311900000	1633300000	2109700000	2114500000	1843800000	1542800000
O43143;O60231;F5H658;Q14562	Putative pre-mRNA-splicing factor ATP-dependent RNA helicase DHX15	DHX15	>sp|O43143|DHX15_HUMAN Putative pre-mRNA-splicing factor ATP-dependent RNA helicase DHX15 OS=Homo sapiens GN=DHX15 PE=1 SV=2	381270000	509800000	100570000	117670000	450860000	476970000	256830000	281140000	276630000	298810000	264240000	284090000	161740000	189370000	138510000	120670000	201070000	153210000	241810000	221190000	278200000	167060000	222250000	185190000
O43164-2;O43164	E3 ubiquitin-protein ligase Praja-2	PJA2	>sp|O43164-2|PJA2_HUMAN Isoform 2 of E3 ubiquitin-protein ligase Praja-2 OS=Homo sapiens GN=PJA2;>sp|O43164|PJA2_HUMAN E3 ubiquitin-protein ligase Praja-2 OS=Homo sapiens GN=PJA2 PE=1 SV=4	1	1	1	1	1	1	16038000	12601000	8925500	7652300	6560800	8850400	11613000	8592600	8845600	11373000	6213000	5367300	16946000	8643200	8569600	8283400	9833900	7289200
O43167;O43167-2	Zinc finger and BTB domain-containing protein 24	ZBTB24	>sp|O43167|ZBT24_HUMAN Zinc finger and BTB domain-containing protein 24 OS=Homo sapiens GN=ZBTB24 PE=1 SV=2;>sp|O43167-2|ZBT24_HUMAN Isoform 2 of Zinc finger and BTB domain-containing protein 24 OS=Homo sapiens GN=ZBTB24	16707000	9448700	1	1	8008300	18484000	11321000	12161000	7886600	5849500	4580600	5643400	2279600	5453600	1	1	2303400	3458200	5931400	2565600	1	1	3343700	2763800
O43172-2;O43172	U4/U6 small nuclear ribonucleoprotein Prp4	PRPF4	>sp|O43172-2|PRP4_HUMAN Isoform 2 of U4/U6 small nuclear ribonucleoprotein Prp4 OS=Homo sapiens GN=PRPF4;>sp|O43172|PRP4_HUMAN U4/U6 small nuclear ribonucleoprotein Prp4 OS=Homo sapiens GN=PRPF4 PE=1 SV=2	17117000	6982900	1	1	10073000	12985000	9356600	11024000	9292900	8544800	12645000	14059000	6114900	7528100	1	2312100	12284000	7070700	8003400	1	1	1	7913200	6642200
O43175;Q5SZU1	D-3-phosphoglycerate dehydrogenase	PHGDH	>sp|O43175|SERA_HUMAN D-3-phosphoglycerate dehydrogenase OS=Homo sapiens GN=PHGDH PE=1 SV=4;>tr|Q5SZU1|Q5SZU1_HUMAN D-3-phosphoglycerate dehydrogenase OS=Homo sapiens GN=PHGDH PE=2 SV=1	127720000	144360000	303810000	309880000	167990000	190770000	263300000	243660000	271120000	258240000	264910000	268770000	276720000	340280000	328320000	311430000	353330000	316160000	203440000	218340000	257950000	224510000	292780000	274360000
O43242;B4DT72;H0YGV8	26S proteasome non-ATPase regulatory subunit 3	PSMD3	>sp|O43242|PSMD3_HUMAN 26S proteasome non-ATPase regulatory subunit 3 OS=Homo sapiens GN=PSMD3 PE=1 SV=2;>tr|B4DT72|B4DT72_HUMAN 26S proteasome non-ATPase regulatory subunit 3 OS=Homo sapiens GN=PSMD3 PE=2 SV=1	194980000	230050000	64419000	26476000	197990000	202360000	197880000	223610000	199050000	184770000	159730000	146220000	121940000	166330000	150510000	147710000	132570000	130730000	149460000	167570000	152500000	167010000	149250000	164200000
O43290	U4/U6.U5 tri-snRNP-associated protein 1	SART1	>sp|O43290|SNUT1_HUMAN U4/U6.U5 tri-snRNP-associated protein 1 OS=Homo sapiens GN=SART1 PE=1 SV=1	26294000	39916000	12089000	10909000	36763000	34410000	33302000	31034000	16956000	14397000	15413000	13720000	6245400	9943800	4832700	3354200	5460400	5525900	9562400	13986000	8720700	11680000	15479000	18218000
O43299;O43299-3;O43299-2	AP-5 complex subunit zeta-1	AP5Z1	>sp|O43299|AP5Z1_HUMAN AP-5 complex subunit zeta-1 OS=Homo sapiens GN=AP5Z1 PE=1 SV=2;>sp|O43299-3|AP5Z1_HUMAN Isoform 3 of AP-5 complex subunit zeta-1 OS=Homo sapiens GN=AP5Z1;>sp|O43299-2|AP5Z1_HUMAN Isoform 2 of AP-5 complex subunit zeta-1 OS=Homo sapie	1	3717700	12452000	28356000	9299700	38277000	2509700	2851400	32072000	22430000	24106000	1	1	8567400	10648000	11186000	1	1	1	17642000	134890000	120460000	16786000	1
O43318-2;O43318;O43318-4;O43318-3;Q9UG54	Mitogen-activated protein kinase kinase kinase 7	MAP3K7;DKFZp586F0420	>sp|O43318-2|M3K7_HUMAN Isoform 1A of Mitogen-activated protein kinase kinase kinase 7 OS=Homo sapiens GN=MAP3K7;>sp|O43318|M3K7_HUMAN Mitogen-activated protein kinase kinase kinase 7 OS=Homo sapiens GN=MAP3K7 PE=1 SV=1;>sp|O43318-4|M3K7_HUMAN Isoform 1D o	252070000	249220000	1	2890700	191750000	151220000	92466000	107350000	94706000	65061000	46391000	44132000	29637000	22997000	9161100	9651600	12180000	10006000	45885000	3961700	17772000	30194000	14366000	18283000
O43324-2;D6RBD7;C9J1V9;O43324;H0YAL7;D6RCQ0;H0YAH9	Eukaryotic translation elongation factor 1 epsilon-1	EEF1E1;hCG_2043275	>sp|O43324-2|MCA3_HUMAN Isoform 2 of Eukaryotic translation elongation factor 1 epsilon-1 OS=Homo sapiens GN=EEF1E1;>tr|D6RBD7|D6RBD7_HUMAN Eukaryotic translation elongation factor 1 epsilon-1 OS=Homo sapiens GN=EEF1E1 PE=4 SV=1;>tr|C9J1V9|C9J1V9_HUMAN HCG	9536000	17812000	1	19113000	9541000	16185000	15284000	14694000	19609000	21606000	18628000	20628000	17677000	23737000	28258000	21658000	18562000	19972000	18924000	10488000	19936000	30632000	15843000	18784000
O43390;O43390-3;O43390-2;B4DT28;O43390-4;E7ETM7	Heterogeneous nuclear ribonucleoprotein R	HNRNPR;HNRPR	>sp|O43390|HNRPR_HUMAN Heterogeneous nuclear ribonucleoprotein R OS=Homo sapiens GN=HNRNPR PE=1 SV=1;>sp|O43390-3|HNRPR_HUMAN Isoform 3 of Heterogeneous nuclear ribonucleoprotein R OS=Homo sapiens GN=HNRNPR;>sp|O43390-2|HNRPR_HUMAN Isoform 2 of Heterogeneo	74475000	78981000	46592000	48561000	89846000	107850000	52381000	55362000	56218000	53312000	54431000	63889000	43200000	43563000	28333000	40736000	48232000	48072000	53997000	77931000	2666400	52016000	61785000	55081000
O43592;F8WDU6;F5GZM3;F5GYW6	Exportin-T	XPOT	>sp|O43592|XPOT_HUMAN Exportin-T OS=Homo sapiens GN=XPOT PE=1 SV=2	3139700	1875900	1	35562000	2251400	979390	36894000	49856000	25019000	40203000	31394000	37671000	177750000	214340000	233060000	176610000	270540000	235030000	81221000	79001000	92745000	105980000	101590000	135190000
O43615;M0QXU7;M0QXM9	Mitochondrial import inner membrane translocase subunit TIM44	TIMM44	>sp|O43615|TIM44_HUMAN Mitochondrial import inner membrane translocase subunit TIM44 OS=Homo sapiens GN=TIMM44 PE=1 SV=2;>tr|M0QXU7|M0QXU7_HUMAN Mitochondrial import inner membrane translocase subunit TIM44 (Fragment) OS=Homo sapiens GN=TIMM44 PE=2 SV=1	1436000	1	1	2354600	1291600	2780100	4763300	8128300	9625900	2844800	4423600	4775400	16943000	9640400	17790000	10696000	14211000	16919000	6689600	1	23495000	10488000	4779300	7647700
O43707-2;O43707;K7EJH8;G3V2W4;H0YJW3;H7C5W8;H7C144;O43707-3;F5GXS2;P35609;B2RCS5	Alpha-actinin-4	ACTN4	>sp|O43707-2|ACTN4_HUMAN Isoform ACTN4ISO of Alpha-actinin-4 OS=Homo sapiens GN=ACTN4;>sp|O43707|ACTN4_HUMAN Alpha-actinin-4 OS=Homo sapiens GN=ACTN4 PE=1 SV=2	12271000	10016000	19755000	45822000	12437000	10954000	17732000	3380500	27689000	9969800	9256500	10142000	22187000	5886400	30602000	29068000	16260000	16158000	10325000	7492100	6911000	21229000	9050100	11385000
O43719;Q5H919;Q5H918	HIV Tat-specific factor 1	HTATSF1	>sp|O43719|HTSF1_HUMAN HIV Tat-specific factor 1 OS=Homo sapiens GN=HTATSF1 PE=1 SV=1	99444000	112610000	1	1	104340000	106910000	61590000	36683000	64959000	53616000	74576000	73310000	48664000	30143000	1	23132000	46701000	34140000	57360000	33487000	27883000	35499000	42779000	51201000
O43809;H3BND3;H3BV41	Cleavage and polyadenylation specificity factor subunit 5	NUDT21	>sp|O43809|CPSF5_HUMAN Cleavage and polyadenylation specificity factor subunit 5 OS=Homo sapiens GN=NUDT21 PE=1 SV=1;>tr|H3BND3|H3BND3_HUMAN Cleavage and polyadenylation-specificity factor subunit 5 (Fragment) OS=Homo sapiens GN=NUDT21 PE=2 SV=2	106800000	96034000	62057000	65504000	119480000	125130000	87662000	85781000	96516000	72329000	105760000	74247000	54923000	37473000	41015000	32238000	54707000	47265000	33930000	32258000	47189000	49594000	52146000	53030000
O43819	Protein SCO2 homolog, mitochondrial	SCO2	>sp|O43819|SCO2_HUMAN Protein SCO2 homolog, mitochondrial OS=Homo sapiens GN=SCO2 PE=1 SV=3	1	1	1	1	1	1	1	1	1	1	1	4018400	1	3662800	1	3014600	1	1	3525200	3256600	4618500	1	1	3734900
O43852;O43852-3;O43852-2;O43852-4;O43852-5;O43852-6;O43852-9;O43852-10;O43852-13;O43852-14;O43852-15;O43852-11;H0Y875;O43852-8;O43852-12;O43852-7	Calumenin	CALU	>sp|O43852|CALU_HUMAN Calumenin OS=Homo sapiens GN=CALU PE=1 SV=2;>sp|O43852-3|CALU_HUMAN Isoform 3 of Calumenin OS=Homo sapiens GN=CALU;>sp|O43852-2|CALU_HUMAN Isoform 2 of Calumenin OS=Homo sapiens GN=CALU;>sp|O43852-4|CALU_HUMAN Isoform 4 of Calumenin O	264410000	265920000	102420000	78787000	268300000	234950000	234670000	220550000	212270000	219150000	130300000	153810000	144880000	128420000	57324000	87525000	127330000	118530000	82237000	118190000	97861000	99907000	113580000	113270000
O43865-2;Q96HN2-4;Q96HN2-3;D7UEQ7;H0Y8B3;O43865;F8W7N8;Q96HN2-2;Q96HN2	Putative adenosylhomocysteinase 2;Putative adenosylhomocysteinase 3;Adenosylhomocysteinase	AHCYL1;AHCYL2	>sp|O43865-2|SAHH2_HUMAN Isoform 2 of Putative adenosylhomocysteinase 2 OS=Homo sapiens GN=AHCYL1;>sp|Q96HN2-4|SAHH3_HUMAN Isoform 4 of Putative adenosylhomocysteinase 3 OS=Homo sapiens GN=AHCYL2;>sp|Q96HN2-3|SAHH3_HUMAN Isoform 3 of Putative adenosylhomoc	1	1	1	1	5480900	5141400	5579000	1	1	1	1	1	1	8181500	9141900	15681000	9420200	8480000	1	3606400	7628300	9596500	8861400	6540000
O60256;O60256-3;E7EPA1;O60256-4;O60256-2;C9K0K7;C9JJS3;I3L0S1;C9JDU5;C9JDH0;E7EW35;I3L331;I3L164;I3L4G9	Phosphoribosyl pyrophosphate synthase-associated protein 2	PRPSAP2	>sp|O60256|KPRB_HUMAN Phosphoribosyl pyrophosphate synthase-associated protein 2 OS=Homo sapiens GN=PRPSAP2 PE=1 SV=1;>sp|O60256-3|KPRB_HUMAN Isoform 3 of Phosphoribosyl pyrophosphate synthase-associated protein 2 OS=Homo sapiens GN=PRPSAP2;>tr|E7EPA1|E7EP	82731000	57152000	106600000	93834000	71192000	61980000	36985000	45834000	30081000	29666000	38896000	29557000	25836000	21495000	7123300	5285000	57363000	25523000	14442000	8265900	1784900	5032400	18802000	10273000
O60264;P28370-2;P28370	SWI/SNF-related matrix-associated actin-dependent regulator of chromatin subfamily A member 5;Probable global transcription activator SNF2L1	SMARCA5;SMARCA1	>sp|O60264|SMCA5_HUMAN SWI/SNF-related matrix-associated actin-dependent regulator of chromatin subfamily A member 5 OS=Homo sapiens GN=SMARCA5 PE=1 SV=1;>sp|P28370-2|SMCA1_HUMAN Isoform 2 of Probable global transcription activator SNF2L1 OS=Homo sapiens G	11955000	9481500	1	1	10452000	19554000	13154000	1	8145400	5626400	6123500	13032000	1	1	1	6161100	7006200	1	20592000	21298000	7261100	6499100	13999000	14143000
O60313;O60313-2;E5KLK1;E5KLJ6;E5KLJ9;E5KLJ5;C9JY58;H7C3G2;H7C141;H7C321	Dynamin-like 120 kDa protein, mitochondrial;Dynamin-like 120 kDa protein, form S1	OPA1	>sp|O60313|OPA1_HUMAN Dynamin-like 120 kDa protein, mitochondrial OS=Homo sapiens GN=OPA1 PE=1 SV=3;>sp|O60313-2|OPA1_HUMAN Isoform 2 of Dynamin-like 120 kDa protein, mitochondrial OS=Homo sapiens GN=OPA1;>tr|E5KLK1|E5KLK1_HUMAN Dynamin-like 120 kDa protei	1	1	1	9131300	3823700	4159100	18141000	21582000	16610000	10204000	7868000	47389000	93307000	53496000	58101000	50847000	47713000	101770000	54582000	22690000	21197000	16143000	31797000	9477900
O60447;F5H4R0	Ecotropic viral integration site 5 protein homolog	EVI5	>sp|O60447|EVI5_HUMAN Ecotropic viral integration site 5 protein homolog OS=Homo sapiens GN=EVI5 PE=1 SV=3;>tr|F5H4R0|F5H4R0_HUMAN Ecotropic viral integration site 5 protein homolog OS=Homo sapiens GN=EVI5 PE=2 SV=1	1	1	1	1	1	1	6391600	9878600	4215400	3225200	5209400	5216500	11019000	4705600	1	4126200	10155000	4642800	5947700	7026600	1	3472400	9003500	5082000
O60506-3;O60506-4;O60506;O60506-2;O60506-5;F6UXX1;H0YAA0	Heterogeneous nuclear ribonucleoprotein Q	SYNCRIP	>sp|O60506-3|HNRPQ_HUMAN Isoform 3 of Heterogeneous nuclear ribonucleoprotein Q OS=Homo sapiens GN=SYNCRIP;>sp|O60506-4|HNRPQ_HUMAN Isoform 4 of Heterogeneous nuclear ribonucleoprotein Q OS=Homo sapiens GN=SYNCRIP;>sp|O60506|HNRPQ_HUMAN Heterogeneous nucle	497520000	448130000	727070000	655630000	457090000	446550000	361520000	395400000	337460000	399100000	362300000	362760000	314290000	282900000	310120000	267650000	333950000	315770000	398640000	395300000	369380000	327040000	316070000	342880000
O60518	Ran-binding protein 6	RANBP6	>sp|O60518|RNBP6_HUMAN Ran-binding protein 6 OS=Homo sapiens GN=RANBP6 PE=1 SV=2	1	1	1	1	1	1	13024000	9582600	4302600	4534800	4178200	5174800	98002000	65491000	94386000	78419000	53300000	61924000	20091000	11539000	76201000	77710000	25618000	9173500
O60762;Q5QPK2;H0Y368;E9PHH5;Q5QPJ9	Dolichol-phosphate mannosyltransferase	DPM1	>sp|O60762|DPM1_HUMAN Dolichol-phosphate mannosyltransferase subunit 1 OS=Homo sapiens GN=DPM1 PE=1 SV=1;>tr|Q5QPK2|Q5QPK2_HUMAN Dolichol-phosphate mannosyltransferase subunit 1 OS=Homo sapiens GN=DPM1 PE=2 SV=1;>tr|H0Y368|H0Y368_HUMAN Dolichol-phosphate m	17588000	26405000	12350000	16688000	21142000	17189000	64940000	53021000	30099000	29650000	47180000	33012000	89473000	75204000	79710000	86336000	109990000	95776000	46447000	42342000	59303000	47789000	60002000	73215000
O60783	28S ribosomal protein S14, mitochondrial	MRPS14	>sp|O60783|RT14_HUMAN 28S ribosomal protein S14, mitochondrial OS=Homo sapiens GN=MRPS14 PE=1 SV=1	12104000	16409000	1	1	17001000	1	11950000	10888000	12397000	14214000	13783000	9284200	5717100	9230900	2838300	1	1	8884100	5585100	9687400	1	1	1	6050800
O60841	Eukaryotic translation initiation factor 5B	EIF5B	>sp|O60841|IF2P_HUMAN Eukaryotic translation initiation factor 5B OS=Homo sapiens GN=EIF5B PE=1 SV=4	12563000	17434000	1	27475000	15053000	18887000	13062000	14454000	19092000	30372000	22560000	15882000	12751000	11897000	11486000	11379000	29186000	27862000	10061000	10779000	1	1	11746000	13363000
O60869-2;O60869-3;O60869	Endothelial differentiation-related factor 1	EDF1	>sp|O60869-2|EDF1_HUMAN Isoform 2 of Endothelial differentiation-related factor 1 OS=Homo sapiens GN=EDF1;>sp|O60869-3|EDF1_HUMAN Isoform 3 of Endothelial differentiation-related factor 1 OS=Homo sapiens GN=EDF1;>sp|O60869|EDF1_HUMAN Endothelial differenti	5098000	5872700	17920000	30494000	10322000	11159000	6092000	5790700	8018500	1	6743200	9888200	4196100	3992200	2926800	1	5574400	6645300	3969300	2958800	2703800	1	4586300	4626800
O60884;H3BMW5;I3L320	DnaJ homolog subfamily A member 2	DNAJA2	>sp|O60884|DNJA2_HUMAN DnaJ homolog subfamily A member 2 OS=Homo sapiens GN=DNAJA2 PE=1 SV=1	72000000	76639000	20977000	1917100	59916000	56422000	120830000	107340000	106140000	103370000	123530000	109080000	202610000	164260000	159950000	155550000	173140000	127850000	151940000	167640000	215280000	236770000	175620000	183280000
O75083;D6RD66;O75083-3	WD repeat-containing protein 1	WDR1	>sp|O75083|WDR1_HUMAN WD repeat-containing protein 1 OS=Homo sapiens GN=WDR1 PE=1 SV=4;>tr|D6RD66|D6RD66_HUMAN WD repeat-containing protein 1 (Fragment) OS=Homo sapiens GN=WDR1 PE=2 SV=1;>sp|O75083-3|WDR1_HUMAN Isoform 2 of WD repeat-containing protein 1 O	7223000	8642600	5695200	6695500	8543900	17281000	5322300	5093100	6857700	6446400	6449200	6586100	3718500	1	14106000	1	3566600	5259200	5848100	1	6309100	11541000	3750400	4108000
O75131;Q86VY2;Q7Z6C8;Q719H8;Q96FN4;E7ENV7;Q8IYJ1;Q96A23;O95741;Q9UBL6-2;Q86YQ8;Q96A23-2;Q9HCH3;O95741-2;Q9UBL6	Copine-3;Copine-2;Copine-9;Copine-4;Copine-6;Copine-7;Copine-8;Copine-5	CPNE3;CPNE8;CPNE5;CPNE2;CPNE9;CPNE4;CPNE6;CPNE7	>sp|O75131|CPNE3_HUMAN Copine-3 OS=Homo sapiens GN=CPNE3 PE=1 SV=1;>tr|Q86VY2|Q86VY2_HUMAN Copine-8 OS=Homo sapiens GN=CPNE8 PE=2 SV=1;>tr|Q7Z6C8|Q7Z6C8_HUMAN CPNE5 protein OS=Homo sapiens GN=CPNE5 PE=2 SV=1;>tr|Q719H8|Q719H8_HUMAN Copine-2 OS=Homo sapiens	4265500	4771100	10383000	5495200	4234800	3634100	5142000	1	1	6339500	6696100	6543900	1	4434200	1	1	8161700	1	1	1	1	1	1	1
O75152;E9PQ61;E9PBY7	Zinc finger CCCH domain-containing protein 11A	ZC3H11A	>sp|O75152|ZC11A_HUMAN Zinc finger CCCH domain-containing protein 11A OS=Homo sapiens GN=ZC3H11A PE=1 SV=3;>tr|E9PQ61|E9PQ61_HUMAN Zinc finger CCCH domain-containing protein 11A OS=Homo sapiens GN=ZC3H11A PE=2 SV=1	5551700	6940400	1	1	6278400	9046600	6153900	5491700	6561000	6281900	7307100	5437300	3599900	5563300	1	3516700	2937400	3389900	11320000	6214300	1	5656700	3893300	4308100
O75155;O75155-2;F8WBB8;C9JH00;Q96NL1	Cullin-associated NEDD8-dissociated protein 2	CAND2	>sp|O75155|CAND2_HUMAN Cullin-associated NEDD8-dissociated protein 2 OS=Homo sapiens GN=CAND2 PE=1 SV=3;>sp|O75155-2|CAND2_HUMAN Isoform 2 of Cullin-associated NEDD8-dissociated protein 2 OS=Homo sapiens GN=CAND2	1155000	605110	4203800	3714100	355320	1453500	364750000	466270000	106190000	144150000	283640000	275530000	1140700000	1087900000	1399800000	1348500000	960960000	996780000	558930000	621290000	1143400000	1149700000	907780000	923200000
O75165;H0YA63;H0Y8Q2	DnaJ homolog subfamily C member 13	DNAJC13	>sp|O75165|DJC13_HUMAN DnaJ homolog subfamily C member 13 OS=Homo sapiens GN=DNAJC13 PE=1 SV=5	581610000	843300000	2506000	37442000	441080000	422750000	418790	638180	974750	419990	137250	288960	63782	226880	206770	1	175880	81487	1633900	126970	189870	259650	90570	181740
O75179-5;O75179-3;O75179-4;O75179-6;H0YM23;O75179-7;O75179-2;O75179;Q8IWZ3-5;Q8IWZ3-2;E9PDP5;Q8IWZ3;Q8IWZ3-4;Q8IWZ3-6	Ankyrin repeat domain-containing protein 17;Ankyrin repeat and KH domain-containing protein 1	ANKRD17;ANKHD1	>sp|O75179-5|ANR17_HUMAN Isoform 5 of Ankyrin repeat domain-containing protein 17 OS=Homo sapiens GN=ANKRD17;>sp|O75179-3|ANR17_HUMAN Isoform 3 of Ankyrin repeat domain-containing protein 17 OS=Homo sapiens GN=ANKRD17;>sp|O75179-4|ANR17_HUMAN Isoform 4 of	1	1	7508500	8998100	1	3722000	4386900	5203200	3613600	4029200	1	1	1	1	11157000	1	1	4256400	1	5417800	7805200	5341700	3428900	3953900
O75306-2;O75306;B7Z9L2	NADH dehydrogenase [ubiquinone] iron-sulfur protein 2, mitochondrial	NDUFS2	>sp|O75306-2|NDUS2_HUMAN Isoform 2 of NADH dehydrogenase [ubiquinone] iron-sulfur protein 2, mitochondrial OS=Homo sapiens GN=NDUFS2;>sp|O75306|NDUS2_HUMAN NADH dehydrogenase [ubiquinone] iron-sulfur protein 2, mitochondrial OS=Homo sapiens GN=NDUFS2 PE=1	12730000	1	1	18335000	3761200	1	14436000	9352300	14847000	12859000	12312000	10377000	17305000	25771000	47887000	43466000	20622000	25731000	19286000	18508000	26426000	20608000	6337700	22143000
O75369-6;O75369-3;O75369-2;O75369-9;O75369;O75369-8;O75369-5;O75369-4;E7EN95;O75369-7	Filamin-B	FLNB	>sp|O75369-6|FLNB_HUMAN Isoform 6 of Filamin-B OS=Homo sapiens GN=FLNB;>sp|O75369-3|FLNB_HUMAN Isoform 3 of Filamin-B OS=Homo sapiens GN=FLNB;>sp|O75369-2|FLNB_HUMAN Isoform 2 of Filamin-B OS=Homo sapiens GN=FLNB;>sp|O75369-9|FLNB_HUMAN Isoform 9 of Filami	5480300	5528000	5439600	3532000	14808000	15469000	8787100	3933000	4565600	5106300	3325400	2239000	2216400	2533400	1	1	1	1	2434400	1411200	1	2586700	1	1
O75396	Vesicle-trafficking protein SEC22b	SEC22B	>sp|O75396|SC22B_HUMAN Vesicle-trafficking protein SEC22b OS=Homo sapiens GN=SEC22B PE=1 SV=4	8165900	6854900	1	15261000	10137000	11030000	21684000	24928000	16770000	14023000	32347000	18790000	27771000	33280000	37419000	41223000	31585000	47930000	19327000	14675000	38004000	35624000	31917000	25961000
O75400-2;O75400;O75400-3;F5H578;H7C2N3;H0YG38	Pre-mRNA-processing factor 40 homolog A	PRPF40A	>sp|O75400-2|PR40A_HUMAN Isoform 2 of Pre-mRNA-processing factor 40 homolog A OS=Homo sapiens GN=PRPF40A;>sp|O75400|PR40A_HUMAN Pre-mRNA-processing factor 40 homolog A OS=Homo sapiens GN=PRPF40A PE=1 SV=2;>sp|O75400-3|PR40A_HUMAN Isoform 3 of Pre-mRNA-proc	72012000	26415000	10551000	14252000	16029000	14292000	38296000	13060000	18161000	9390900	13097000	17004000	15037000	16086000	8745900	7911400	15250000	14307000	24207000	18358000	6712200	14224000	23522000	16236000
O75419-2;O75419;O75419-3;H7BZ91;C9J911	Cell division control protein 45 homolog	CDC45	>sp|O75419-2|CDC45_HUMAN Isoform 2 of Cell division control protein 45 homolog OS=Homo sapiens GN=CDC45;>sp|O75419|CDC45_HUMAN Cell division control protein 45 homolog OS=Homo sapiens GN=CDC45 PE=1 SV=1;>sp|O75419-3|CDC45_HUMAN Isoform 3 of Cell division c	1	1	1	1	1	1	1	1	1	1	1	4442900	1	1	1	1	1	1	1	1	1	1	1	1
O75475;O75475-3;O75475-2	PC4 and SFRS1-interacting protein	PSIP1	>sp|O75475|PSIP1_HUMAN PC4 and SFRS1-interacting protein OS=Homo sapiens GN=PSIP1 PE=1 SV=1;>sp|O75475-3|PSIP1_HUMAN Isoform 3 of PC4 and SFRS1-interacting protein OS=Homo sapiens GN=PSIP1;>sp|O75475-2|PSIP1_HUMAN Isoform 2 of PC4 and SFRS1-interacting pro	5474700	5144300	4701300	6843900	6491200	5378800	4529000	4677700	6883500	5823300	1	5595400	2380800	2843100	3667900	1	1	3315700	5201600	1	1	1644900	1	3854900
O75477;B0QZ43	Erlin-1	ERLIN1	>sp|O75477|ERLN1_HUMAN Erlin-1 OS=Homo sapiens GN=ERLIN1 PE=1 SV=1;>tr|B0QZ43|B0QZ43_HUMAN Erlin-1 (Fragment) OS=Homo sapiens GN=ERLIN1 PE=2 SV=1	1	1100300	1	1	854720	1175900	4867100	2984700	2953000	2454400	1973300	2281300	20861000	19897000	12901000	28237000	22352000	8596100	4426600	4816700	36001000	38383000	5335800	6308800
O75489;B4DFM8;E9PS48	NADH dehydrogenase [ubiquinone] iron-sulfur protein 3, mitochondrial	NDUFS3	>sp|O75489|NDUS3_HUMAN NADH dehydrogenase [ubiquinone] iron-sulfur protein 3, mitochondrial OS=Homo sapiens GN=NDUFS3 PE=1 SV=1	9623300	13842000	1	1	5799700	3823700	11285000	11773000	9039300	9807800	9000500	9990800	19401000	21204000	23793000	15120000	20649000	10755000	12255000	1	15678000	24553000	10750000	10466000
O75494-5;Q5JRI1;O75494-4;O75494-6;O75494-3;O75494-2;O75494;Q8WXF0;R4GMP8;Q6IQ42	Serine/arginine-rich splicing factor 10	SRSF10	>sp|O75494-5|SRS10_HUMAN Isoform 5 of Serine/arginine-rich splicing factor 10 OS=Homo sapiens GN=SRSF10;>tr|Q5JRI1|Q5JRI1_HUMAN Serine/arginine-rich-splicing factor 10 OS=Homo sapiens GN=SRSF10 PE=2 SV=1;>sp|O75494-4|SRS10_HUMAN Isoform 4 of Serine/arginin	18424000	27091000	1	1	28227000	20049000	13869000	14961000	21966000	15303000	18525000	15686000	12221000	1	6210400	1	1	11711000	22765000	31404000	1	1	17172000	17732000
O75506	Heat shock factor-binding protein 1	HSBP1	>sp|O75506|HSBP1_HUMAN Heat shock factor-binding protein 1 OS=Homo sapiens GN=HSBP1 PE=1 SV=1	1	1	1	1	3903900	3510300	4616800	4970100	4447600	5038300	5736800	5027200	5100400	4670500	1	1	7008600	5672800	4914400	5455900	5050800	1	6045500	7245900
O75531	Barrier-to-autointegration factor;Barrier-to-autointegration factor, N-terminally processed	BANF1	>sp|O75531|BAF_HUMAN Barrier-to-autointegration factor OS=Homo sapiens GN=BANF1 PE=1 SV=1	66564000	64445000	140370000	131990000	48154000	44008000	38372000	27439000	137310000	124590000	71318000	77605000	21813000	27366000	36148000	31532000	28641000	32120000	157530000	198980000	17747000	31014000	48472000	58111000
O75533;H7C341;O75533-2;B4DGZ4;F8WC19	Splicing factor 3B subunit 1	SF3B1	>sp|O75533|SF3B1_HUMAN Splicing factor 3B subunit 1 OS=Homo sapiens GN=SF3B1 PE=1 SV=3	949450000	879920000	28179000	40020000	877740000	852350000	379890000	431710000	430940000	457710000	358080000	394660000	202870000	212110000	78854000	53140000	166850000	190360000	335850000	283870000	160480000	218730000	299560000	314770000
O75643;O75643-2;C9JAQ9;B4E0P5	U5 small nuclear ribonucleoprotein 200 kDa helicase	SNRNP200	>sp|O75643|U520_HUMAN U5 small nuclear ribonucleoprotein 200 kDa helicase OS=Homo sapiens GN=SNRNP200 PE=1 SV=2	285030000	289080000	213930000	233110000	377280000	350730000	202690000	220670000	226740000	238920000	201190000	207070000	157240000	175230000	113980000	161650000	144320000	157780000	212400000	203110000	178530000	181110000	205150000	211140000
O75688;C9JIR6;O75688-4;B8ZZF0;O75688-5;O75688-3	Protein phosphatase 1B	PPM1B	>sp|O75688|PPM1B_HUMAN Protein phosphatase 1B OS=Homo sapiens GN=PPM1B PE=1 SV=1;>tr|C9JIR6|C9JIR6_HUMAN Protein phosphatase 1B (Fragment) OS=Homo sapiens GN=PPM1B PE=2 SV=1;>sp|O75688-4|PPM1B_HUMAN Isoform 4 of Protein phosphatase 1B OS=Homo sapiens GN=PP	5557700000	5970300000	174050000	287590000	4436500000	4585600000	2688700000	2689300000	2366000000	2367500000	2634300000	2725000000	1790300000	1662900000	1362500000	1504000000	1273000000	1321400000	1787500000	1870900000	1882500000	1694800000	1566200000	1712000000
O75688-2	Protein phosphatase 1B	PPM1B	>sp|O75688-2|PPM1B_HUMAN Isoform Beta-2 of Protein phosphatase 1B OS=Homo sapiens GN=PPM1B	72593000	106660000	1	1	71958000	97192000	61753000	71639000	58463000	53101000	33642000	32542000	28059000	40007000	51033000	1	40897000	38877000	14585000	38309000	36257000	40362000	43853000	54128000
O75691	Small subunit processome component 20 homolog	UTP20	>sp|O75691|UTP20_HUMAN Small subunit processome component 20 homolog OS=Homo sapiens GN=UTP20 PE=1 SV=3	1	1	1	1	15547000	12114000	103830000	75027000	63520000	65730000	52949000	49774000	113700000	154480000	73677000	108680000	89498000	74513000	104850000	128950000	58555000	70742000	164860000	161880000
O75821;K7ER90;K7EL20;K7ENA8;K7EP16;K7EL60	Eukaryotic translation initiation factor 3 subunit G	EIF3G	>sp|O75821|EIF3G_HUMAN Eukaryotic translation initiation factor 3 subunit G OS=Homo sapiens GN=EIF3G PE=1 SV=2;>tr|K7ER90|K7ER90_HUMAN Eukaryotic translation initiation factor 3 subunit G (Fragment) OS=Homo sapiens GN=EIF3G PE=2 SV=1;>tr|K7EL20|K7EL20_HUMA	185620000	204620000	189100000	267580000	231730000	220070000	144230000	125530000	128000000	99695000	110860000	101170000	68860000	66923000	77234000	86780000	88508000	61265000	68764000	72802000	45158000	44275000	85338000	81556000
O75822-2;O75822-3;O75822	Eukaryotic translation initiation factor 3 subunit J	EIF3J	>sp|O75822-2|EIF3J_HUMAN Isoform 2 of Eukaryotic translation initiation factor 3 subunit J OS=Homo sapiens GN=EIF3J;>sp|O75822-3|EIF3J_HUMAN Isoform 3 of Eukaryotic translation initiation factor 3 subunit J OS=Homo sapiens GN=EIF3J;>sp|O75822|EIF3J_HUMAN E	1	9655200	155360000	10847000	5220800	6672800	11294000	5010300	4968000	3944700	1	3382700	3294400	1	1	682740	1176700	1	1818500	1	1	1	1	1
O75915;F8WF90;C9JQU6;F8WF33	PRA1 family protein 3	ARL6IP5	>sp|O75915|PRAF3_HUMAN PRA1 family protein 3 OS=Homo sapiens GN=ARL6IP5 PE=1 SV=1;>tr|F8WF90|F8WF90_HUMAN PRA1 family protein 3 OS=Homo sapiens GN=ARL6IP5 PE=2 SV=1;>tr|C9JQU6|C9JQU6_HUMAN PRA1 family protein 3 OS=Homo sapiens GN=ARL6IP5 PE=2 SV=1;>tr|F8WF	3530800	4225000	13660000	11567000	3786900	3247300	6426000	11405000	5946300	10600000	7684900	10135000	21537000	19874000	22267000	23706000	24843000	30932000	12742000	17294000	17795000	30554000	13774000	24549000
O75934	Pre-mRNA-splicing factor SPF27	BCAS2	>sp|O75934|SPF27_HUMAN Pre-mRNA-splicing factor SPF27 OS=Homo sapiens GN=BCAS2 PE=1 SV=1	29478000	41247000	1	1	57416000	41372000	38861000	18034000	26870000	30105000	21279000	21390000	19990000	19150000	1	1	23690000	24708000	21209000	28168000	29067000	1	22427000	26688000
O75935-3;O75935;Q8NB28;O75935-2	Dynactin subunit 3	DCTN3	>sp|O75935-3|DCTN3_HUMAN Isoform 3 of Dynactin subunit 3 OS=Homo sapiens GN=DCTN3;>sp|O75935|DCTN3_HUMAN Dynactin subunit 3 OS=Homo sapiens GN=DCTN3 PE=1 SV=1;>tr|Q8NB28|Q8NB28_HUMAN Dynactin 3 (P22), isoform CRA_a OS=Homo sapiens GN=DCTN3 PE=2 SV=1;>sp|O7	15230000	20559000	10437000	6061700	21508000	19670000	9424700	19422000	14204000	15548000	14169000	13445000	7383100	7907100	10647000	7879800	6700900	8632300	7599100	10823000	7320000	8168100	37351000	10665000
O75937	DnaJ homolog subfamily C member 8	DNAJC8	>sp|O75937|DNJC8_HUMAN DnaJ homolog subfamily C member 8 OS=Homo sapiens GN=DNAJC8 PE=1 SV=2	10434000	10944000	1	12224000	18172000	13708000	7945700	12320000	8898200	12106000	11218000	15810000	1	5040500	1	1	7647300	7468700	6723600	7041100	1	1	5348600	1
O75940	Survival of motor neuron-related-splicing factor 30	SMNDC1	>sp|O75940|SPF30_HUMAN Survival of motor neuron-related-splicing factor 30 OS=Homo sapiens GN=SMNDC1 PE=1 SV=1	11565000	9676800	1	1	8993900	8151000	7197000	7744600	6841200	6667600	5949600	7156400	7660300	5264800	5725100	5274200	4621300	2362700	7236200	5723000	1	1	5367100	6354700
O75947-2;O75947;F5H608	ATP synthase subunit d, mitochondrial	ATP5H	>sp|O75947-2|ATP5H_HUMAN Isoform 2 of ATP synthase subunit d, mitochondrial OS=Homo sapiens GN=ATP5H;>sp|O75947|ATP5H_HUMAN ATP synthase subunit d, mitochondrial OS=Homo sapiens GN=ATP5H PE=1 SV=3;>tr|F5H608|F5H608_HUMAN ATP synthase subunit d, mitochondri	13489000	12016000	1	14291000	16010000	12961000	38508000	25341000	26611000	23614000	31868000	39614000	51552000	39918000	41575000	45444000	40281000	39210000	18503000	15912000	21267000	18307000	30159000	29620000
O76094;D6RDY6;O76094-2	Signal recognition particle subunit SRP72	SRP72	>sp|O76094|SRP72_HUMAN Signal recognition particle subunit SRP72 OS=Homo sapiens GN=SRP72 PE=1 SV=3;>tr|D6RDY6|D6RDY6_HUMAN Signal recognition particle subunit SRP72 (Fragment) OS=Homo sapiens GN=SRP72 PE=2 SV=2;>sp|O76094-2|SRP72_HUMAN Isoform 2 of Signal	1	1	1	1	1	1	457390000	438980000	1	1	1	5034700	8155600	1	598540	8572100	23248000	48185000	1	1	1	7097300	7319300	1
O94776;Q68DB1;E9PCS8;E7EQY4;Q9BTC8-2;E7EV10;Q9BTC8;D6W5A2;H0YIT0;E9PF88;F8VSM3;H0Y4T7	Metastasis-associated protein MTA2	MTA2;DKFZp686F2281	>sp|O94776|MTA2_HUMAN Metastasis-associated protein MTA2 OS=Homo sapiens GN=MTA2 PE=1 SV=1;>tr|Q68DB1|Q68DB1_HUMAN Metastasis-associated protein MTA2 OS=Homo sapiens GN=DKFZp686F2281 PE=2 SV=1	64855000	54625000	18770000	27495000	47667000	55520000	47572000	61470000	42121000	38162000	36039000	23791000	24458000	19389000	27876000	21181000	17975000	21844000	28891000	32735000	23050000	23621000	31216000	24831000
O94826	Mitochondrial import receptor subunit TOM70	TOMM70A	>sp|O94826|TOM70_HUMAN Mitochondrial import receptor subunit TOM70 OS=Homo sapiens GN=TOMM70A PE=1 SV=1	1	1	11733000	36925000	4022600	3217200	5649000	6166300	5578000	6642500	6905600	8098700	11046000	12402000	17532000	9423900	11987000	17106000	4299700	5542700	7551600	7113800	1	7692200
O94874;O94874-3;O94874-2	E3 UFM1-protein ligase 1	UFL1	>sp|O94874|UFL1_HUMAN E3 UFM1-protein ligase 1 OS=Homo sapiens GN=UFL1 PE=1 SV=2;>sp|O94874-3|UFL1_HUMAN Isoform 3 of E3 UFM1-protein ligase 1 OS=Homo sapiens GN=UFL1;>sp|O94874-2|UFL1_HUMAN Isoform 2 of E3 UFM1-protein ligase 1 OS=Homo sapiens GN=UFL1	1	1	1	1	1	1	9940600	9274300	7051300	8542500	5680500	6995500	13672000	10715000	28200000	8465000	15965000	8625800	8182300	9017900	9803800	11030000	8742600	7334500
O94905;E5RHW4;E5RJ09;O94905-2;O94905-3	Erlin-2	ERLIN2	>sp|O94905|ERLN2_HUMAN Erlin-2 OS=Homo sapiens GN=ERLIN2 PE=1 SV=1;>tr|E5RHW4|E5RHW4_HUMAN Erlin-2 (Fragment) OS=Homo sapiens GN=ERLIN2 PE=2 SV=1;>tr|E5RJ09|E5RJ09_HUMAN Erlin-2 (Fragment) OS=Homo sapiens GN=ERLIN2 PE=2 SV=1	1953500	6174700	1	6701900	11067000	10893000	71495000	51886000	36000000	34777000	38829000	49315000	297320000	280640000	191810000	259400000	189720000	184260000	99530000	79890000	139990000	137260000	87958000	71491000
O94906-2;O94906	Pre-mRNA-processing factor 6	PRPF6	>sp|O94906-2|PRP6_HUMAN Isoform 2 of Pre-mRNA-processing factor 6 OS=Homo sapiens GN=PRPF6;>sp|O94906|PRP6_HUMAN Pre-mRNA-processing factor 6 OS=Homo sapiens GN=PRPF6 PE=1 SV=1	118700000	92911000	26826000	32969000	109410000	115910000	67429000	69806000	38917000	35283000	41426000	30832000	28611000	25226000	16283000	18231000	6599000	20883000	39176000	40111000	26292000	22273000	45610000	40825000
O94915;F5GX82;H0Y9X0;F2Z2S2;D6RJI4	Protein furry homolog-like	FRYL	>sp|O94915|FRYL_HUMAN Protein furry homolog-like OS=Homo sapiens GN=FRYL PE=1 SV=2;>tr|F5GX82|F5GX82_HUMAN Protein furry homolog-like OS=Homo sapiens GN=FRYL PE=2 SV=1;>tr|H0Y9X0|H0Y9X0_HUMAN Protein furry homolog-like (Fragment) OS=Homo sapiens GN=FRYL PE	57724000	45005000	1	1	27750000	12558000	11269000	11282000	8769600	18567000	9142600	6192900	3597200	3415800	6095700	1	1723100	1284900	4354000	8613200	25790000	29325000	2939200	2845700
O95071-2;O95071;E7EMW7;E7ET84	E3 ubiquitin-protein ligase UBR5	UBR5	>sp|O95071-2|UBR5_HUMAN Isoform 2 of E3 ubiquitin-protein ligase UBR5 OS=Homo sapiens GN=UBR5;>sp|O95071|UBR5_HUMAN E3 ubiquitin-protein ligase UBR5 OS=Homo sapiens GN=UBR5 PE=1 SV=2;>tr|E7EMW7|E7EMW7_HUMAN E3 ubiquitin-protein ligase UBR5 OS=Homo sapiens	5746500	1	1	1	4588100	4670700	51493000	37125000	24806000	21561000	23594000	27991000	29881000	1	11965000	1	13264000	15936000	32310000	19235000	9836000	9033900	17013000	12345000
O95140-2;O95140	Mitofusin-2	MFN2	>sp|O95140-2|MFN2_HUMAN Isoform 2 of Mitofusin-2 OS=Homo sapiens GN=MFN2;>sp|O95140|MFN2_HUMAN Mitofusin-2 OS=Homo sapiens GN=MFN2 PE=1 SV=3	5575600	1	1	1	1	1	1	1	1	7715700	1	7823000	10479000	1	1	5597100	7684700	1	8036900	1	4163300	1	1	6056200
O95168-2;O95168;F2Z3P9;C9JXQ9	NADH dehydrogenase [ubiquinone] 1 beta subcomplex subunit 4	NDUFB4	>sp|O95168-2|NDUB4_HUMAN Isoform 2 of NADH dehydrogenase [ubiquinone] 1 beta subcomplex subunit 4 OS=Homo sapiens GN=NDUFB4;>sp|O95168|NDUB4_HUMAN NADH dehydrogenase [ubiquinone] 1 beta subcomplex subunit 4 OS=Homo sapiens GN=NDUFB4 PE=1 SV=3	9030100	5458500	9984600	5277900	9372100	13438000	13945000	6904900	5135900	6155200	6838600	6249200	15113000	25779000	1	1	1802600	7867500	13195000	1	6542300	1	1	1
O95202;O95202-2;O95202-3	LETM1 and EF-hand domain-containing protein 1, mitochondrial	LETM1	>sp|O95202|LETM1_HUMAN LETM1 and EF-hand domain-containing protein 1, mitochondrial OS=Homo sapiens GN=LETM1 PE=1 SV=1	5505300	6674800	8875100	17823000	10292000	9769500	13074000	18314000	14067000	14101000	14944000	18356000	22346000	23043000	29544000	22821000	38790000	35090000	12795000	16983000	24907000	32790000	20886000	26959000
O95218-2;O95218	Zinc finger Ran-binding domain-containing protein 2	ZRANB2	>sp|O95218-2|ZRAB2_HUMAN Isoform 2 of Zinc finger Ran-binding domain-containing protein 2 OS=Homo sapiens GN=ZRANB2;>sp|O95218|ZRAB2_HUMAN Zinc finger Ran-binding domain-containing protein 2 OS=Homo sapiens GN=ZRANB2 PE=1 SV=2	99975000	72758000	16225000	34968000	75343000	100530000	66195000	28660000	32466000	30866000	41709000	54788000	26728000	27652000	1	48111000	25196000	23357000	47817000	34156000	43301000	43892000	39955000	38497000
O95232;J3KPP4;B4DJ96;D6RDI2;H0YA81;D6RHH0;U3KQT3;E7EN55;O95232-2;C9JL41	Luc7-like protein 3	LUC7L3	>sp|O95232|LC7L3_HUMAN Luc7-like protein 3 OS=Homo sapiens GN=LUC7L3 PE=1 SV=2;>tr|J3KPP4|J3KPP4_HUMAN Cisplatin resistance-associated overexpressed protein, isoform CRA_b OS=Homo sapiens GN=LUC7L3 PE=4 SV=1;>tr|B4DJ96|B4DJ96_HUMAN Luc7-like protein 3 OS=H	144650000	151660000	6524000	8239300	115450000	109690000	63723000	51378000	47171000	58678000	41806000	42302000	38479000	36714000	41489000	54002000	63718000	57177000	42173000	66401000	80221000	95221000	85081000	71466000
O95292;E5RK64;O95292-2	Vesicle-associated membrane protein-associated protein B/C	VAPB	>sp|O95292|VAPB_HUMAN Vesicle-associated membrane protein-associated protein B/C OS=Homo sapiens GN=VAPB PE=1 SV=3	12510000	9733500	1	9594800	8893600	9206100	12360000	16216000	9354800	25915000	9100600	1	35228000	18406000	16444000	28111000	24128000	27329000	12265000	13358000	18033000	24237000	15237000	15272000
O95347;O95347-2;Q5T821	Structural maintenance of chromosomes protein 2	SMC2	>sp|O95347|SMC2_HUMAN Structural maintenance of chromosomes protein 2 OS=Homo sapiens GN=SMC2 PE=1 SV=2;>sp|O95347-2|SMC2_HUMAN Isoform 2 of Structural maintenance of chromosomes protein 2 OS=Homo sapiens GN=SMC2	29822000	33928000	38916000	12738000	39122000	46317000	175300000	189980000	106830000	140650000	129200000	112600000	224530000	230220000	324160000	303230000	221440000	236360000	202830000	197880000	323030000	297090000	241250000	228190000
O95373;E9PLJ0	Importin-7	IPO7	>sp|O95373|IPO7_HUMAN Importin-7 OS=Homo sapiens GN=IPO7 PE=1 SV=1	12009000	6361600	30348000	11411000	13773000	5198900	4445700000	4444900000	1335900000	1421100000	3822700000	3759800000	17369000000	19584000000	19027000000	17897000000	18545000000	19995000000	8830300000	10597000000	19358000000	18180000000	13615000000	13021000000
O95400	CD2 antigen cytoplasmic tail-binding protein 2	CD2BP2	>sp|O95400|CD2B2_HUMAN CD2 antigen cytoplasmic tail-binding protein 2 OS=Homo sapiens GN=CD2BP2 PE=1 SV=1	21733000	28463000	1	1	19453000	17743000	14426000	9196100	9755800	19971000	14314000	17621000	7578700	1	1	1	4350200	5046200	12642000	2311800	5523700	4519700	8362900	6697100
O95470;H0Y3V8;H7BXL7	Sphingosine-1-phosphate lyase 1	SGPL1	>sp|O95470|SGPL1_HUMAN Sphingosine-1-phosphate lyase 1 OS=Homo sapiens GN=SGPL1 PE=1 SV=3	1	1	9260400	13006000	375830	1724100	66247000	44971000	46630000	34268000	33636000	32412000	98305000	110510000	77655000	72709000	71256000	58529000	181380000	225520000	282210000	277440000	216900000	209180000
O95721;C9JAF7	Synaptosomal-associated protein 29	SNAP29	>sp|O95721|SNP29_HUMAN Synaptosomal-associated protein 29 OS=Homo sapiens GN=SNAP29 PE=1 SV=1	34083000	37356000	5677000	5612100	18188000	26557000	16406000	17317000	18410000	19839000	12974000	1	18483000	5695700	9186800	1	9656000	7623200	9149000	7776500	1	1	9665500	8486800
O95816;B4DXE2	BAG family molecular chaperone regulator 2	BAG2	>sp|O95816|BAG2_HUMAN BAG family molecular chaperone regulator 2 OS=Homo sapiens GN=BAG2 PE=1 SV=1;>tr|B4DXE2|B4DXE2_HUMAN BAG family molecular chaperone regulator 2 OS=Homo sapiens GN=BAG2 PE=2 SV=1	6350800	7366100	11767000	1	9421900	9986100	9973400	8597300	7192700	10504000	10292000	12261000	15549000	9116300	11056000	9374800	12988000	12949000	9991400	9002300	15639000	16682000	15455000	9941700
O95831-3;O95831;O95831-6;E9PMA0;O95831-4;O95831-2	Apoptosis-inducing factor 1, mitochondrial	AIFM1	>sp|O95831-3|AIFM1_HUMAN Isoform 3 of Apoptosis-inducing factor 1, mitochondrial OS=Homo sapiens GN=AIFM1;>sp|O95831|AIFM1_HUMAN Apoptosis-inducing factor 1, mitochondrial OS=Homo sapiens GN=AIFM1 PE=1 SV=1;>sp|O95831-6|AIFM1_HUMAN Isoform 6 of Apoptosis-i	10712000	8740600	1	14815000	9051700	8773900	11279000	12360000	9277900	9081800	7639300	8717600	11946000	10270000	30004000	1	11061000	1	13365000	11727000	1	1	9911300	15172000
O95881;V9GY50;V9GYV4	Thioredoxin domain-containing protein 12	TXNDC12	>sp|O95881|TXD12_HUMAN Thioredoxin domain-containing protein 12 OS=Homo sapiens GN=TXNDC12 PE=1 SV=1	69847000	75663000	1	1	22964000	29235000	7076500	6599400	10345000	9615400	29467000	27881000	9107600	6871100	1	3307100	22014000	7574000	14343000	11023000	1	1	20960000	14639000
O95905;O95905-3;O95905-2;C9J316;C9JGV1;F2Z2R1	Protein SGT1	ECD	>sp|O95905|SGT1_HUMAN Protein SGT1 OS=Homo sapiens GN=ECD PE=1 SV=1;>sp|O95905-3|SGT1_HUMAN Isoform 3 of Protein SGT1 OS=Homo sapiens GN=ECD;>sp|O95905-2|SGT1_HUMAN Isoform 2 of Protein SGT1 OS=Homo sapiens GN=ECD;>tr|C9J316|C9J316_HUMAN Protein SGT1 (Frag	1317500	5528700	1	1899300	10571000	1646800	12150000	7927700	33189000	4781300	11204000	10665000	30602000	26780000	41707000	33648000	27238000	22486000	14913000	20264000	1	12993000	29968000	28190000
O96008;O96008-2;K7EKG4;K7EJ57	Mitochondrial import receptor subunit TOM40 homolog	TOMM40	>sp|O96008|TOM40_HUMAN Mitochondrial import receptor subunit TOM40 homolog OS=Homo sapiens GN=TOMM40 PE=1 SV=1;>sp|O96008-2|TOM40_HUMAN Isoform 2 of Mitochondrial import receptor subunit TOM40 homolog OS=Homo sapiens GN=TOMM40;>tr|K7EKG4|K7EKG4_HUMAN Mitoc	5293700	2766900	1	1	2611500	1	26476000	15613000	5312100	8674700	10488000	6299900	36246000	67632000	45721000	28698000	94105000	140050000	6871400	5109500	25043000	27458000	19606000	10820000
O96019-2;O96019;H7C5S0	Actin-like protein 6A	ACTL6A	>sp|O96019-2|ACL6A_HUMAN Isoform 2 of Actin-like protein 6A OS=Homo sapiens GN=ACTL6A;>sp|O96019|ACL6A_HUMAN Actin-like protein 6A OS=Homo sapiens GN=ACTL6A PE=1 SV=1	11598000	12485000	1	1	11335000	11150000	2589400	12285000	9876300	9934200	8910200	9182600	8120600	1	1	1	1	11371000	11316000	13951000	1	1	14929000	10165000
P00338;P00338-3;P00338-4;P00338-5;P00338-2;F5GYU2;F5GXY2;F5GXH2;F5H5J4;F5H6W8;F5H8H6;F5GXC7;F5GWW2;F5GXU1;F5GZQ4;F5H5G7;F5H155;G3XAP5;F5H245;Q6ZMR3;P07864	L-lactate dehydrogenase A chain	LDHA	>sp|P00338|LDHA_HUMAN L-lactate dehydrogenase A chain OS=Homo sapiens GN=LDHA PE=1 SV=2;>sp|P00338-3|LDHA_HUMAN Isoform 3 of L-lactate dehydrogenase A chain OS=Homo sapiens GN=LDHA;>sp|P00338-4|LDHA_HUMAN Isoform 4 of L-lactate dehydrogenase A chain OS=Hom	113050000	119090000	462320000	649580000	225730000	202700000	160490000	164380000	353820000	303870000	307390000	273270000	177910000	133110000	188300000	185840000	306060000	319470000	95725000	109610000	93441000	99900000	167750000	175900000
P00367;B4DGN5;P49448;B3KV55	Glutamate dehydrogenase 1, mitochondrial;Glutamate dehydrogenase;Glutamate dehydrogenase 2, mitochondrial	GLUD1;GLUD2	>sp|P00367|DHE3_HUMAN Glutamate dehydrogenase 1, mitochondrial OS=Homo sapiens GN=GLUD1 PE=1 SV=2;>tr|B4DGN5|B4DGN5_HUMAN Glutamate dehydrogenase OS=Homo sapiens GN=GLUD1 PE=2 SV=1;>sp|P49448|DHE4_HUMAN Glutamate dehydrogenase 2, mitochondrial OS=Homo sapi	12837000	14848000	35577000	30578000	19354000	14688000	24077000	14931000	28124000	22205000	15877000	21907000	14199000	16692000	12999000	17701000	26377000	21417000	21407000	22941000	13111000	14539000	18201000	11365000
P00403	Cytochrome c oxidase subunit 2	MT-CO2	>sp|P00403|COX2_HUMAN Cytochrome c oxidase subunit 2 OS=Homo sapiens GN=MT-CO2 PE=1 SV=1	7173900	1	1	1	8734600	10663000	50918000	64274000	43009000	29009000	50462000	54746000	146740000	194980000	126410000	104650000	117650000	127450000	95914000	116280000	157450000	165620000	114730000	120510000
P00441;H7BYH4	Superoxide dismutase [Cu-Zn]	SOD1	>sp|P00441|SODC_HUMAN Superoxide dismutase [Cu-Zn] OS=Homo sapiens GN=SOD1 PE=1 SV=2;>tr|H7BYH4|H7BYH4_HUMAN Superoxide dismutase [Cu-Zn] OS=Homo sapiens GN=SOD1 PE=2 SV=1	1	1	4245300	1	2504500	2097500	1	2690900	4008700	4236300	3302200	2930300	2629000	1579900	2186400	2491100	17502000	9772300	1200700	1659700	1	1	4414600	3899300
P00491;G3V2H3;G3V5M2	Purine nucleoside phosphorylase	PNP	>sp|P00491|PNPH_HUMAN Purine nucleoside phosphorylase OS=Homo sapiens GN=PNP PE=1 SV=2	4897300	1	1	8924700	5269000	7276200	3486800	4707000	16083000	6111900	5247800	3834700	4224300	4463000	2075900	5368300	15717000	15311000	4937300	2961800	6120600	1	5584100	6175800
P00492;Q9NRG1-2;Q9NRG1	Hypoxanthine-guanine phosphoribosyltransferase	HPRT1	>sp|P00492|HPRT_HUMAN Hypoxanthine-guanine phosphoribosyltransferase OS=Homo sapiens GN=HPRT1 PE=1 SV=2	31145000	18601000	59130000	102750000	28565000	28806000	22235000	20922000	36880000	57632000	34154000	34550000	22086000	33544000	34642000	22949000	53826000	52358000	19052000	12143000	30660000	30924000	27332000	35116000
P00558;B7Z7A9;E7ERH5;P07205	Phosphoglycerate kinase 1;Phosphoglycerate kinase	PGK1	>sp|P00558|PGK1_HUMAN Phosphoglycerate kinase 1 OS=Homo sapiens GN=PGK1 PE=1 SV=3;>tr|B7Z7A9|B7Z7A9_HUMAN Phosphoglycerate kinase OS=Homo sapiens GN=PGK1 PE=2 SV=1;>tr|E7ERH5|E7ERH5_HUMAN Phosphoglycerate kinase OS=Homo sapiens GN=PGK1 PE=2 SV=1	34742000	56460000	439130000	396100000	117550000	106820000	85950000	96034000	161250000	190320000	170080000	167730000	132550000	141230000	191410000	141040000	273270000	270640000	95614000	77589000	72332000	67607000	150560000	148260000
P00846	ATP synthase subunit a	MT-ATP6	>sp|P00846|ATP6_HUMAN ATP synthase subunit a OS=Homo sapiens GN=MT-ATP6 PE=1 SV=1	1	1	1	1	1	1	1	9538000	9753400	5903600	1	1	1	26880000	19021000	16064000	32928000	34470000	18339000	11295000	19487000	20296000	27335000	32802000
P00918	Carbonic anhydrase 2	CA2	>sp|P00918|CAH2_HUMAN Carbonic anhydrase 2 OS=Homo sapiens GN=CA2 PE=1 SV=2	8986800	9972200	42675000	92378000	18235000	17674000	21383000	8538800	26510000	37809000	28464000	14178000	10897000	9472000	24999000	5785300	57967000	47673000	7627600	7682800	4011600	5732900	13488000	14248000
P01111	GTPase NRas	NRAS	>sp|P01111|RASN_HUMAN GTPase NRas OS=Homo sapiens GN=NRAS PE=1 SV=1	1	1	1	1	1	1	1	1	1	1	1	34373000	115530000	121390000	1	1	112320000	148080000	46413000	1	88902000	1	82024000	1
P01112;P01112-2	GTPase HRas;GTPase HRas, N-terminally processed	HRAS	>sp|P01112|RASH_HUMAN GTPase HRas OS=Homo sapiens GN=HRAS PE=1 SV=1;>sp|P01112-2|RASH_HUMAN Isoform 2 of GTPase HRas OS=Homo sapiens GN=HRAS	1	1	1	1	1	1	156630000	73179000	75501000	68541000	1	1	1	168090000	218170000	393400000	63895000	446130000	33217000	126700000	107600000	229740000	128710000	168680000
P01116-2;P01116;G3V4K2;G3V5T7	GTPase KRas;GTPase KRas, N-terminally processed	KRAS	>sp|P01116-2|RASK_HUMAN Isoform 2B of GTPase KRas OS=Homo sapiens GN=KRAS;>sp|P01116|RASK_HUMAN GTPase KRas OS=Homo sapiens GN=KRAS PE=1 SV=1	12127000	2153700	3023800	1918700	3528900	616090	18389000000	23124000000	15790000000	16485000000	24858000000	21763000000	52286000000	51070000000	73309000000	79758000000	44463000000	48492000000	46442000000	66397000000	97256000000	73389000000	69886000000	71227000000
P01605;P01624;P04434;P04207	Ig kappa chain V-I region Lay;Ig kappa chain V-III region POM;Ig kappa chain V-III region VH;Ig kappa chain V-III region CLL		>sp|P01605|KV113_HUMAN Ig kappa chain V-I region Lay OS=Homo sapiens PE=1 SV=1;>sp|P01624|KV306_HUMAN Ig kappa chain V-III region POM OS=Homo sapiens PE=1 SV=1;>sp|P04434|KV310_HUMAN Ig kappa chain V-III region VH (Fragment) OS=Homo sapiens PE=4 SV=1;>sp|P	1	1	1	1	1	12462000	1	1	1	1	1	1	1	1	1	1	1	1	1	1	1	1	1	1
P01617;P01614;P06309;P06310	Ig kappa chain V-II region TEW;Ig kappa chain V-II region Cum;Ig kappa chain V-II region GM607;Ig kappa chain V-II region RPMI 6410		>sp|P01617|KV204_HUMAN Ig kappa chain V-II region TEW OS=Homo sapiens PE=1 SV=1;>sp|P01614|KV201_HUMAN Ig kappa chain V-II region Cum OS=Homo sapiens PE=1 SV=1;>sp|P06309|KV205_HUMAN Ig kappa chain V-II region GM607 (Fragment) OS=Homo sapiens PE=4 SV=1;>sp	22321000	60281000	160360000	161940000	2675900	1065500	249700	4602500000	586550	747700	2011500000	124990000	665920	535290	1	10294000000	4507500000	5556700000	31529000	50413000	264610000	3500100000	1550700	5309900
P01621	Ig kappa chain V-III region NG9		>sp|P01621|KV303_HUMAN Ig kappa chain V-III region NG9 (Fragment) OS=Homo sapiens PE=1 SV=1	48053000	41762000	59741000	54860000	9847700	1	1	1	2176800	1	15117000	13386000	1300900	2036900	1	1	1	297610	17884000	5467200	1	1	1	884650
P01625;P06312;P06313;P06314	Ig kappa chain V-IV region Len;Ig kappa chain V-IV region;Ig kappa chain V-IV region JI;Ig kappa chain V-IV region B17	IGKV4-1	>sp|P01625|KV402_HUMAN Ig kappa chain V-IV region Len OS=Homo sapiens PE=1 SV=2;>sp|P06312|KV401_HUMAN Ig kappa chain V-IV region (Fragment) OS=Homo sapiens GN=IGKV4-1 PE=4 SV=1;>sp|P06313|KV403_HUMAN Ig kappa chain V-IV region JI OS=Homo sapiens PE=4 SV=1	220900000	186540000	215030000	54423000	29374000	31419000	13912000	10431000	23270000	1	36497000	25799000	1	57307000	20294000	19832000	17837000	14594000	31612000	41496000	17688000	1	47133000	42855000
P01857	Ig gamma-1 chain C region	IGHG1	>sp|P01857|IGHG1_HUMAN Ig gamma-1 chain C region OS=Homo sapiens GN=IGHG1 PE=1 SV=1	43013000	8353200	142810000	12617000	3325400	2748900	1	2900600	3538900	1	23768000	3952800	2462400	1	1	1	1	1	2434700	1862200	1596200	1	1391900	1
P01859	Ig gamma-2 chain C region	IGHG2	>sp|P01859|IGHG2_HUMAN Ig gamma-2 chain C region OS=Homo sapiens GN=IGHG2 PE=1 SV=2	923290000	845100000	1180100000	1120200000	303380000	299200000	30951000	35536000	150150000	163290000	418200000	441110000	125750000	131490000	57081000	67749000	25184000	25525000	444750000	416110000	52345000	82311000	71769000	75007000
P02452	Collagen alpha-1(I) chain	COL1A1	>sp|P02452|CO1A1_HUMAN Collagen alpha-1(I) chain OS=Homo sapiens GN=COL1A1 PE=1 SV=5	11166000	7942000	1	2112700	2089100	3043800	4817500	8624800	1	1	1523100	1911100	3363400	1	1	1	1	779750	4100700	2581700	1	1	1	1
P02533;CON__P02533;CON__Q61782;CON__Q9D312;K7ENV3	Keratin, type I cytoskeletal 14	KRT14	>sp|P02533|K1C14_HUMAN Keratin, type I cytoskeletal 14 OS=Homo sapiens GN=KRT14 PE=1 SV=4;>P02533 SWISS-PROT:P02533 Tax_Id=9606 Gene_Symbol=KRT14 Keratin, type I cytoskeletal 14	2344200	1935800	495180000	578370000	222110000	180090000	87797000	100780000	450850000	318930000	1366900000	1279700000	181610000	175500000	166560000	273220000	193510000	159420000	230470000	145820000	7447300	7096500	209650000	216960000
P02538;CON__P02538;O95678;CON__O95678;CON__Q8VED5	Keratin, type II cytoskeletal 6A	KRT6A	>sp|P02538|K2C6A_HUMAN Keratin, type II cytoskeletal 6A OS=Homo sapiens GN=KRT6A PE=1 SV=3;>P02538 SWISS-PROT:P02538 Tax_Id=9606 Gene_Symbol=KRT6A Keratin, type II cytoskeletal 6A	1	4731600	167470000	103380000	46855000	30325000	4591800	1	19995000	18953000	113290000	81542000	30844000	55377000	28123000	60402000	127110000	125880000	13130000	8674800	5220400	6465100	14932000	15622000
P02786;G3V0E5;F5H6B1;F8WBE5	Transferrin receptor protein 1;Transferrin receptor protein 1, serum form	TFRC	>sp|P02786|TFR1_HUMAN Transferrin receptor protein 1 OS=Homo sapiens GN=TFRC PE=1 SV=2;>tr|G3V0E5|G3V0E5_HUMAN Transferrin receptor (P90, CD71), isoform CRA_c OS=Homo sapiens GN=TFRC PE=4 SV=1;>tr|F5H6B1|F5H6B1_HUMAN Transferrin receptor protein 1, serum f	7155100	9467200	15706000	15318000	7845800	8129200	8112300	6938100	9780800	9139200	10633000	11079000	13789000	11265000	9961600	7764000	20534000	13549000	15320000	12260000	15343000	17349000	9934900	15466000
P04049;P04049-2;B4E0X2;H7C155;B4E1N6	RAF proto-oncogene serine/threonine-protein kinase	RAF1	>sp|P04049|RAF1_HUMAN RAF proto-oncogene serine/threonine-protein kinase OS=Homo sapiens GN=RAF1 PE=1 SV=1;>sp|P04049-2|RAF1_HUMAN Isoform 2 of RAF proto-oncogene serine/threonine-protein kinase OS=Homo sapiens GN=RAF1;>tr|B4E0X2|B4E0X2_HUMAN RAF proto-onc	963680	3982700	2083300	4924000	351290	1132200	1260900000	1241300000	609730000	713190000	1085000000	1051000000	1973300000	2094900000	1866900000	1640300000	1705500000	1741500000	1770500000	1762900000	2222800000	2189500000	2268400000	1993200000
P04075;J3KPS3;H3BQN4;P04075-2;H3BPS8;H3BUH7;H3BR04;H3BMQ8;H3BU78;H3BR68;P09972;K7EKH5;C9J8F3;J3KSV6;J3QKP5;Q5T7D5;A8MVZ9;P05062	Fructose-bisphosphate aldolase A;Fructose-bisphosphate aldolase	ALDOA	>sp|P04075|ALDOA_HUMAN Fructose-bisphosphate aldolase A OS=Homo sapiens GN=ALDOA PE=1 SV=2;>tr|J3KPS3|J3KPS3_HUMAN Fructose-bisphosphate aldolase OS=Homo sapiens GN=ALDOA PE=3 SV=1;>tr|H3BQN4|H3BQN4_HUMAN Fructose-bisphosphate aldolase OS=Homo sapiens GN=A	237030000	237570000	570550000	779980000	321810000	326910000	265500000	291520000	476360000	447120000	385910000	349410000	211470000	210880000	219800000	207450000	422290000	394090000	173580000	173260000	129850000	91448000	253410000	248290000
P04080	Cystatin-B	CSTB	>sp|P04080|CYTB_HUMAN Cystatin-B OS=Homo sapiens GN=CSTB PE=1 SV=2	100660000	106060000	87278000	110230000	58084000	65883000	71441000	57232000	102430000	115620000	83476000	117810000	68454000	72914000	58313000	98345000	81355000	103530000	118270000	93089000	48400000	53151000	84318000	71720000
P04083;Q5T3N1;Q5T3N0	Annexin A1	ANXA1	>sp|P04083|ANXA1_HUMAN Annexin A1 OS=Homo sapiens GN=ANXA1 PE=1 SV=2;>tr|Q5T3N1|Q5T3N1_HUMAN Annexin (Fragment) OS=Homo sapiens GN=ANXA1 PE=2 SV=1	1	1	1	1	1	1	1	1	1	1	1	928450	3601500	3846800	1	1	1	1	1570800	1	1	1	1	1
P04114	Apolipoprotein B-100;Apolipoprotein B-48	APOB	>sp|P04114|APOB_HUMAN Apolipoprotein B-100 OS=Homo sapiens GN=APOB PE=1 SV=2	1	2813300	1	1	1	1	24286000	24229000	30897000	22466000	22755000	17400000	125390000	164060000	157440000	134720000	117450000	130400000	36816000	43618000	50724000	72819000	64590000	58412000
P04181;P04181-2	Ornithine aminotransferase, mitochondrial;Ornithine aminotransferase, hepatic form;Ornithine aminotransferase, renal form	OAT	>sp|P04181|OAT_HUMAN Ornithine aminotransferase, mitochondrial OS=Homo sapiens GN=OAT PE=1 SV=1;>sp|P04181-2|OAT_HUMAN Isoform 2 of Ornithine aminotransferase, mitochondrial OS=Homo sapiens GN=OAT	165120000	181360000	147940000	160140000	165740000	173830000	97909000	95856000	112210000	120610000	95269000	94089000	63623000	80243000	33561000	17029000	93041000	100270000	35744000	40297000	38770000	25819000	67144000	81805000
P04264;CON__P04264;CON__H-INV:HIT000016045	Keratin, type II cytoskeletal 1	KRT1	>sp|P04264|K2C1_HUMAN Keratin, type II cytoskeletal 1 OS=Homo sapiens GN=KRT1 PE=1 SV=6;>P04264 SWISS-PROT:P04264 Tax_Id=9606 Gene_Symbol=KRT1 Keratin, type II cytoskeletal 1	695950000	613360000	20798000000	22908000000	6290100000	6257600000	5093400000	4962000000	12788000000	12140000000	35279000000	37691000000	5969400000	6084200000	7860500000	7396100000	5433200000	5309800000	11946000000	12933000000	1650300000	1585000000	10777000000	10070000000
P04350;M0R278;M0QYM7;M0R042;M0R1I1	Tubulin beta-4A chain	TUBB4A	>sp|P04350|TBB4A_HUMAN Tubulin beta-4A chain OS=Homo sapiens GN=TUBB4A PE=1 SV=2	1	22679000	1	39416000	2732100	3840000	7748200	1	4797400	1	1	14386000	23154000	1	1	1	37561000	26735000	17263000	11612000	1	1	28130000	15285000
P04406;P04406-2;E7EUT5;O14556	Glyceraldehyde-3-phosphate dehydrogenase	GAPDH	>sp|P04406|G3P_HUMAN Glyceraldehyde-3-phosphate dehydrogenase OS=Homo sapiens GN=GAPDH PE=1 SV=3;>sp|P04406-2|G3P_HUMAN Isoform 2 of Glyceraldehyde-3-phosphate dehydrogenase OS=Homo sapiens GN=GAPDH;>tr|E7EUT5|E7EUT5_HUMAN Glyceraldehyde-3-phosphate dehydr	351930000	485180000	1696000000	1634500000	574230000	659060000	443070000	430970000	842320000	913420000	883460000	804240000	536460000	572170000	505730000	686060000	1023900000	1119600000	379490000	371740000	420710000	332440000	614930000	569280000
P04637-4;P04637;P04637-5;P04637-6;P04637-2;J3KP33;P04637-3;P04637-7;E7EQX7;E7ESS1;P04637-8;P04637-9;E9PCY9;S4R334;E9PFT5;E7EMR6	Cellular tumor antigen p53	TP53	>sp|P04637-4|P53_HUMAN Isoform 4 of Cellular tumor antigen p53 OS=Homo sapiens GN=TP53;>sp|P04637|P53_HUMAN Cellular tumor antigen p53 OS=Homo sapiens GN=TP53 PE=1 SV=4;>sp|P04637-5|P53_HUMAN Isoform 5 of Cellular tumor antigen p53 OS=Homo sapiens GN=TP53;	14977000	18145000	13836000	10886000	13703000	16726000	14370000	27213000	15269000	31256000	16401000	11720000	13913000	21469000	18165000	15766000	10370000	9138100	14828000	14344000	16150000	23977000	11107000	10086000
P04843;B7Z4L4;F8WF32	Dolichyl-diphosphooligosaccharide--protein glycosyltransferase subunit 1	RPN1	>sp|P04843|RPN1_HUMAN Dolichyl-diphosphooligosaccharide--protein glycosyltransferase subunit 1 OS=Homo sapiens GN=RPN1 PE=1 SV=1;>tr|B7Z4L4|B7Z4L4_HUMAN Dolichyl-diphosphooligosaccharide--protein glycosyltransferase subunit 1 OS=Homo sapiens GN=RPN1 PE=2 S	84507000	86085000	230010000	238420000	88149000	94653000	154420000	184860000	155650000	161250000	156190000	151490000	217640000	229060000	244630000	261680000	254200000	256850000	180540000	213520000	276420000	243400000	231670000	250810000
P04844-2;P04844;Q5JYR4;Q5JYR7;F2Z3K5;Q5JYR3	Dolichyl-diphosphooligosaccharide--protein glycosyltransferase subunit 2	RPN2	>sp|P04844-2|RPN2_HUMAN Isoform 2 of Dolichyl-diphosphooligosaccharide--protein glycosyltransferase subunit 2 OS=Homo sapiens GN=RPN2;>sp|P04844|RPN2_HUMAN Dolichyl-diphosphooligosaccharide--protein glycosyltransferase subunit 2 OS=Homo sapiens GN=RPN2 PE=	8979000	8276300	8315400	35134000	5325600	16239000	49927000	60822000	31504000	38831000	30258000	48419000	133410000	110970000	149490000	55980000	145140000	133120000	21915000	66037000	102170000	82543000	93895000	83625000
P05023-4;P05023;P05023-3;P05023-2;M0R116;P13637;P13637-2;P13637-3;B1AKY9;P50993;H0Y7C1;Q5TC01;Q5TC02;Q13733;Q5TC05;E9PRA5;M0QXF2	Sodium/potassium-transporting ATPase subunit alpha-1	ATP1A1	>sp|P05023-4|AT1A1_HUMAN Isoform 4 of Sodium/potassium-transporting ATPase subunit alpha-1 OS=Homo sapiens GN=ATP1A1;>sp|P05023|AT1A1_HUMAN Sodium/potassium-transporting ATPase subunit alpha-1 OS=Homo sapiens GN=ATP1A1 PE=1 SV=1;>sp|P05023-3|AT1A1_HUMAN Is	89455000	103390000	247800000	222210000	134690000	138460000	372780000	384460000	290130000	251830000	285550000	276160000	448160000	497940000	570500000	598360000	517490000	501860000	263330000	334060000	584420000	515780000	411680000	406110000
P05141	ADP/ATP translocase 2;ADP/ATP translocase 2, N-terminally processed	SLC25A5	>sp|P05141|ADT2_HUMAN ADP/ATP translocase 2 OS=Homo sapiens GN=SLC25A5 PE=1 SV=7	740250000	875860000	754310000	748970000	721680000	698390000	1501900000	1501900000	917280000	1037700000	1551500000	1386700000	3038500000	2972700000	2865600000	2985300000	2372000000	2549300000	2201300000	2123400000	2433500000	2433800000	2433300000	2369500000
P05198;H0YJS4;G3V4T5	Eukaryotic translation initiation factor 2 subunit 1	EIF2S1	>sp|P05198|IF2A_HUMAN Eukaryotic translation initiation factor 2 subunit 1 OS=Homo sapiens GN=EIF2S1 PE=1 SV=3;>tr|H0YJS4|H0YJS4_HUMAN Eukaryotic translation initiation factor 2 subunit 1 (Fragment) OS=Homo sapiens GN=EIF2S1 PE=4 SV=1;>tr|G3V4T5|G3V4T5_HUM	28266000	87191000	61089000	104420000	78520000	67902000	42645000	38778000	64710000	64408000	47155000	50644000	39024000	61149000	32958000	37079000	48973000	51080000	31352000	3875700	59791000	1	6911400	7849300
P05386	60S acidic ribosomal protein P1	RPLP1	>sp|P05386|RLA1_HUMAN 60S acidic ribosomal protein P1 OS=Homo sapiens GN=RPLP1 PE=1 SV=1	59212000	1	64083000	1	63110000	58486000	121560000	107470000	113000000	176090000	112600000	115150000	138560000	140870000	89577000	381000000	28118000	285930000	133940000	154870000	1	1486200	97924000	205400000
P05387;H0YDD8	60S acidic ribosomal protein P2	RPLP2	>sp|P05387|RLA2_HUMAN 60S acidic ribosomal protein P2 OS=Homo sapiens GN=RPLP2 PE=1 SV=1	684100000	705160000	983200000	985590000	743150000	736690000	1371000000	1189700000	1270100000	1291100000	997530000	939880000	1497700000	1839200000	1722000000	1902600000	1564400000	1608700000	1057300000	1288500000	1806400000	1755700000	1445700000	1484000000
P05388;Q3B7A4;F8VWS0;F8VW21;F8VU65;F8VPE8;G3V210;F8VQY6;F8VRK7;Q8NHW5;F8VWV4;F8VZS0;F8VS58;F8W1K8	60S acidic ribosomal protein P0;60S acidic ribosomal protein P0-like	RPLP0;RPLP0P6	>sp|P05388|RLA0_HUMAN 60S acidic ribosomal protein P0 OS=Homo sapiens GN=RPLP0 PE=1 SV=1;>tr|Q3B7A4|Q3B7A4_HUMAN 60S acidic ribosomal protein P0 OS=Homo sapiens GN=RPLP0 PE=2 SV=1;>tr|F8VWS0|F8VWS0_HUMAN 60S acidic ribosomal protein P0 OS=Homo sapiens GN=R	581370000	555250000	581720000	687580000	579050000	568090000	740840000	655560000	629160000	539680000	568850000	693160000	860050000	834970000	848660000	757220000	805360000	738120000	495710000	678300000	795520000	685300000	802810000	758380000
P05412	Transcription factor AP-1	JUN	>sp|P05412|JUN_HUMAN Transcription factor AP-1 OS=Homo sapiens GN=JUN PE=1 SV=2	1	1	1	1	1	1	1	1	1158200	1570900	1202200	1476500	1380800	1190500	1	1	1	1	3531500	17588000	2487100	2453200	2047800	2049500
P05455;E7ERC4;E9PGX9;E9PFL9	Lupus La protein	SSB	>sp|P05455|LA_HUMAN Lupus La protein OS=Homo sapiens GN=SSB PE=1 SV=2	55083000	51316000	37954000	25215000	78132000	72906000	64768000	65438000	96392000	79023000	81834000	73819000	44983000	67380000	29753000	32163000	43988000	32765000	62569000	44761000	23171000	22702000	46017000	47549000
P05787;CON__P05787;P05787-2;F8VUG2;F8W1U3;F8VRG4;CON__H-INV:HIT000292931;F8VP67;CON__Q9DCV7;CON__Q9H552;Q9NSB2;CON__Q9NSB2;CON__Q6ISB0;F8VQY3	Keratin, type II cytoskeletal 8	KRT8	>sp|P05787|K2C8_HUMAN Keratin, type II cytoskeletal 8 OS=Homo sapiens GN=KRT8 PE=1 SV=7;>P05787 SWISS-PROT:P05787 Tax_Id=9606 Gene_Symbol=KRT8 Keratin, type II cytoskeletal 8;>sp|P05787-2|K2C8_HUMAN Isoform 2 of Keratin, type II cytoskeletal 8 OS=Homo sapi	1099700	827930	74641000	70631000	9091900	41108000	5995600	6112000	2060100	645370	5965800	12613000	2781800	1870800	1	1	1655200	1977600	1	1	3144700	5150800	1	972870
P05976-2;P05976;P08590	Myosin light chain 1/3, skeletal muscle isoform;Myosin light chain 3	MYL1;MYL3	>sp|P05976-2|MYL1_HUMAN Isoform MLC3 of Myosin light chain 1/3, skeletal muscle isoform OS=Homo sapiens GN=MYL1;>sp|P05976|MYL1_HUMAN Myosin light chain 1/3, skeletal muscle isoform OS=Homo sapiens GN=MYL1 PE=1 SV=3;>sp|P08590|MYL3_HUMAN Myosin light chain	18903000	1	1	43963000	20517000	26074000	33075000	1	31579000	29009000	27185000	27312000	15506000	21733000	11424000	12191000	25507000	13918000	82789000	78407000	11841000	12036000	33547000	34004000
P06493;P06493-2;E5RIU6;K7ELV5;E7ESI2;P24941-2;P24941;Q00526;G3V5T9;G3V317;F8VXD2;B4DNF9;F8VZZ0;F8VZ51;K7EJ83;Q00535-2;H0YAZ9;Q00535;Q00534;E7EUK8;Q96Q40-2;Q96Q40-4;E5RGN0;Q96Q40-3;O94921-3;Q96Q40-5;Q96Q40;O94921-2;O94921;F5H6Z0;Q07002;Q07002-2;Q00536;Q00536-3;Q07002-3;Q00537-2;Q00537;Q00536-2;J3QSD7;Q9NYV4-3;Q14004-2;Q9NYV4-2;Q9NYV4;Q14004	Cyclin-dependent kinase 1	CDK1	>sp|P06493|CDK1_HUMAN Cyclin-dependent kinase 1 OS=Homo sapiens GN=CDK1 PE=1 SV=3;>sp|P06493-2|CDK1_HUMAN Isoform 2 of Cyclin-dependent kinase 1 OS=Homo sapiens GN=CDK1;>tr|E5RIU6|E5RIU6_HUMAN Cyclin-dependent kinase 1 (Fragment) OS=Homo sapiens GN=CDK1 PE	120710000	136770000	158370000	128430000	127680000	142590000	129720000	127330000	151210000	134280000	101350000	121220000	98342000	101940000	95041000	90520000	111220000	112160000	97256000	95733000	107330000	118360000	114420000	116650000
P06576;F8VPV9;H0YH81;F8W079;F8W0P7;H0YI37;F8VQY0	ATP synthase subunit beta, mitochondrial;ATP synthase subunit beta	ATP5B	>sp|P06576|ATPB_HUMAN ATP synthase subunit beta, mitochondrial OS=Homo sapiens GN=ATP5B PE=1 SV=3;>tr|F8VPV9|F8VPV9_HUMAN ATP synthase subunit beta OS=Homo sapiens GN=ATP5B PE=2 SV=1;>tr|H0YH81|H0YH81_HUMAN ATP synthase subunit beta (Fragment) OS=Homo sapi	338950000	325180000	790930000	850530000	347270000	379240000	589060000	626170000	552410000	542270000	682320000	675250000	980030000	909910000	1102500000	1036700000	1033800000	1035400000	513460000	582090000	869570000	888290000	792560000	785620000
P06730;P06730-3;D6RBW1;P06730-2;H0Y8J7	Eukaryotic translation initiation factor 4E	EIF4E	>sp|P06730|IF4E_HUMAN Eukaryotic translation initiation factor 4E OS=Homo sapiens GN=EIF4E PE=1 SV=2;>sp|P06730-3|IF4E_HUMAN Isoform 3 of Eukaryotic translation initiation factor 4E OS=Homo sapiens GN=EIF4E;>tr|D6RBW1|D6RBW1_HUMAN Eukaryotic translation in	25998000	12988000	9885600	27973000	15901000	25516000	16967000	11675000	16958000	17184000	12902000	5678800	15781000	1	12643000	1	16180000	15550000	4485700	1	1	13817000	8564200	12693000
P06733;P06733-2;K7EM90;E5RI09;E5RG95;K7EPM1;K7EKN2;E5RGZ4;P13929-3;P13929-2;P13929	Alpha-enolase	ENO1	>sp|P06733|ENOA_HUMAN Alpha-enolase OS=Homo sapiens GN=ENO1 PE=1 SV=2;>sp|P06733-2|ENOA_HUMAN Isoform MBP-1 of Alpha-enolase OS=Homo sapiens GN=ENO1	518750000	598510000	2531600000	2682600000	726520000	717920000	645080000	620520000	1051800000	979030000	851610000	746020000	634440000	674970000	742490000	844370000	1176600000	1210800000	416080000	420990000	533260000	463210000	816580000	808720000
P06737-2;E9PK47;P06737;P11217-2;P11217;P11216;H0Y4Z6	Glycogen phosphorylase, liver form;Phosphorylase;Glycogen phosphorylase, muscle form;Glycogen phosphorylase, brain form	PYGL;PYGM;PYGB	>sp|P06737-2|PYGL_HUMAN Isoform 2 of Glycogen phosphorylase, liver form OS=Homo sapiens GN=PYGL;>tr|E9PK47|E9PK47_HUMAN Phosphorylase OS=Homo sapiens GN=PYGL PE=2 SV=1;>sp|P06737|PYGL_HUMAN Glycogen phosphorylase, liver form OS=Homo sapiens GN=PYGL PE=1 SV	1	1	17986000	13431000	4864100	5879900	8195700	5567200	6493800	8309400	5882300	9270100	1	5371900	7474700	7102900	1	8839900	4138200	8095600	1	1	6341500	6359200
P06744;K7EQ48;P06744-2;K7EPY4;K7EP41;K7ELR7;K7ENA0;K7ERC6;CON__Q3ZBD7;K7ERK8;K7EIL4;K7ESF4;Q8N196	Glucose-6-phosphate isomerase	GPI	>sp|P06744|G6PI_HUMAN Glucose-6-phosphate isomerase OS=Homo sapiens GN=GPI PE=1 SV=4;>tr|K7EQ48|K7EQ48_HUMAN Glucose-6-phosphate isomerase OS=Homo sapiens GN=GPI PE=2 SV=2;>sp|P06744-2|G6PI_HUMAN Isoform 2 of Glucose-6-phosphate isomerase OS=Homo sapiens G	35386000	46773000	318510000	241850000	73512000	64641000	58805000	59234000	125350000	148700000	104020000	106380000	76666000	91485000	55676000	43087000	163770000	161760000	29892000	30119000	44055000	16935000	89398000	90351000
P06748;P06748-2;P06748-3;E5RI98;E5RGW4	Nucleophosmin	NPM1	>sp|P06748|NPM_HUMAN Nucleophosmin OS=Homo sapiens GN=NPM1 PE=1 SV=2;>sp|P06748-2|NPM_HUMAN Isoform 2 of Nucleophosmin OS=Homo sapiens GN=NPM1;>sp|P06748-3|NPM_HUMAN Isoform 3 of Nucleophosmin OS=Homo sapiens GN=NPM1	2399200000	2414200000	1115200000	1219900000	2257700000	2179900000	2043000000	2298900000	1715600000	1640800000	1383000000	1443700000	1890300000	1862700000	1943700000	1865100000	1925200000	1925400000	1375600000	1504500000	1808600000	1758300000	1568700000	1686100000
P06753-2;P06753-3;P06753-6;Q5VU59;P06753-5;P06753-4;Q5VU61;J3KN67;P06753;D6R904;P06753-7;K7EP68;K7ERG3;K7ENT6;H0YL80;H0YKX5;H0YKP3;A6NL28-2;A6NL28;H0YNC7;P09493-2;P09493-5;F5H7S3;P07951-3;H7BYY1;H0YK48;H0YL52;B7Z596;Q5TCU3;P09493-9;P09493-8;P09493-7;P09493-6;P09493-4;P09493-3;P09493-10;P09493;P07951-2;P07951;CON__Q3SX28;Q5TCU8;Q6ZN40;D6RFM2	Tropomyosin alpha-3 chain	TPM3	>sp|P06753-2|TPM3_HUMAN Isoform 2 of Tropomyosin alpha-3 chain OS=Homo sapiens GN=TPM3;>sp|P06753-3|TPM3_HUMAN Isoform 3 of Tropomyosin alpha-3 chain OS=Homo sapiens GN=TPM3;>sp|P06753-6|TPM3_HUMAN Isoform 6 of Tropomyosin alpha-3 chain OS=Homo sapiens GN=	98337000	124560000	327780000	186090000	166000000	144670000	103480000	104160000	143170000	139500000	142990000	151840000	72068000	86485000	69767000	56623000	107450000	104530000	124200000	94189000	35564000	35817000	67558000	57957000
P07108;P07108-3;P07108-2;P07108-4;P07108-5;P07108-6	Acyl-CoA-binding protein	DBI	>sp|P07108|ACBP_HUMAN Acyl-CoA-binding protein OS=Homo sapiens GN=DBI PE=1 SV=2;>sp|P07108-3|ACBP_HUMAN Isoform 3 of Acyl-CoA-binding protein OS=Homo sapiens GN=DBI;>sp|P07108-2|ACBP_HUMAN Isoform 2 of Acyl-CoA-binding protein OS=Homo sapiens GN=DBI;>sp|P0	1	1	37148000	107000000	8446500	11132000	8745300	6366400	28036000	31941000	16347000	17694000	10548000	13823000	1	1	26576000	24329000	5831900	6690700	1	1	8163600	8554300
P07195;A8MW50;C9J7H8;F5H793	L-lactate dehydrogenase B chain;L-lactate dehydrogenase	LDHB	>sp|P07195|LDHB_HUMAN L-lactate dehydrogenase B chain OS=Homo sapiens GN=LDHB PE=1 SV=2;>tr|A8MW50|A8MW50_HUMAN L-lactate dehydrogenase (Fragment) OS=Homo sapiens GN=LDHB PE=2 SV=1	248200000	333440000	1280900000	1473800000	366920000	386870000	369160000	428670000	632860000	635590000	543360000	488470000	380670000	382090000	348320000	396230000	632600000	657170000	256420000	267140000	239650000	208770000	440540000	417970000
P07237;F5H8J2;H7BZ94;H0Y3Z3;I3L398;I3L312;I3L0S0;I3NI03;I3L4M2;I3L3U6;I3L3P5;I3L1Y5;I3L514	Protein disulfide-isomerase	P4HB	>sp|P07237|PDIA1_HUMAN Protein disulfide-isomerase OS=Homo sapiens GN=P4HB PE=1 SV=3;>tr|F5H8J2|F5H8J2_HUMAN Uncharacterized protein OS=Homo sapiens GN=P4HB PE=3 SV=1;>tr|H7BZ94|H7BZ94_HUMAN Protein disulfide-isomerase OS=Homo sapiens GN=P4HB PE=2 SV=2;>tr	53214000	85666000	180220000	136980000	127050000	93618000	67086000	70540000	63466000	71975000	62222000	67158000	53844000	56675000	52996000	33147000	112250000	100810000	35544000	31215000	20962000	30018000	58199000	64207000
P07305-2;P07305	Histone H1.0;Histone H1.0, N-terminally processed	H1F0	>sp|P07305-2|H10_HUMAN Isoform 2 of Histone H1.0 OS=Homo sapiens GN=H1F0;>sp|P07305|H10_HUMAN Histone H1.0 OS=Homo sapiens GN=H1F0 PE=1 SV=3	1	1	1	1	5614600	1	1	1	1	1	1	1	1	1	3857700	3996500	4771900	5445300	1	4118500	1	1	5869000	3861000
P07355;P07355-2;H0YN42;H0YMD0;H0YMU9;H0YM50;A6NMY6;H0YKS4;H0YMM1;H0YKZ7;H0YLV6;H0YMT9;H0YKX9;H0YN28;H0YL33;H0YMW4;H0YNP5;H0YKL9;H0YN52;H0YNA0;H0YKV8;H0YLE2;H0YMD9	Annexin A2;Annexin;Putative annexin A2-like protein	ANXA2;ANXA2P2	>sp|P07355|ANXA2_HUMAN Annexin A2 OS=Homo sapiens GN=ANXA2 PE=1 SV=2;>sp|P07355-2|ANXA2_HUMAN Isoform 2 of Annexin A2 OS=Homo sapiens GN=ANXA2;>tr|H0YN42|H0YN42_HUMAN Annexin (Fragment) OS=Homo sapiens GN=ANXA2 PE=2 SV=1;>tr|H0YMD0|H0YMD0_HUMAN Annexin (Fr	27729000	24711000	41896000	46183000	64284000	79972000	31270000	49438000	76991000	79198000	148230000	101510000	29675000	24018000	66099000	20926000	29362000	51858000	33269000	34269000	4981700	9553000	31421000	15235000
P07737;K7EJ44;I3L3D5;CON__P02584	Profilin-1	PFN1	>sp|P07737|PROF1_HUMAN Profilin-1 OS=Homo sapiens GN=PFN1 PE=1 SV=2;>tr|K7EJ44|K7EJ44_HUMAN Profilin 1, isoform CRA_b OS=Homo sapiens GN=PFN1 PE=4 SV=1	139800000	112380000	572790000	473830000	193680000	204120000	141550000	140880000	253710000	327130000	200060000	201410000	141960000	177160000	172410000	225700000	280430000	325360000	90259000	97071000	148120000	117140000	188320000	200430000
P07741-2;H3BQF1;P07741;H3BSW3;H3BQZ9;H3BQB1	Adenine phosphoribosyltransferase	APRT	>sp|P07741-2|APT_HUMAN Isoform 2 of Adenine phosphoribosyltransferase OS=Homo sapiens GN=APRT;>tr|H3BQF1|H3BQF1_HUMAN Adenine phosphoribosyltransferase (Fragment) OS=Homo sapiens GN=APRT PE=2 SV=2;>sp|P07741|APT_HUMAN Adenine phosphoribosyltransferase OS=H	4793200	1	23651000	20299000	6051900	5386500	8418200	11457000	12291000	18492000	9842000	13693000	10475000	1	1	1	17424000	21665000	7097900	1	1	2505300	13799000	15723000
P07814;V9GYZ6;V9GZ76	Bifunctional glutamate/proline--tRNA ligase;Glutamate--tRNA ligase;Proline--tRNA ligase	EPRS	>sp|P07814|SYEP_HUMAN Bifunctional glutamate/proline--tRNA ligase OS=Homo sapiens GN=EPRS PE=1 SV=5;>tr|V9GYZ6|V9GYZ6_HUMAN Bifunctional glutamate/proline--tRNA ligase (Fragment) OS=Homo sapiens GN=EPRS PE=3 SV=1	223300000	223210000	162350000	212640000	253170000	258690000	400400000	423290000	332320000	352600000	289920000	305270000	324320000	399860000	336130000	358120000	347970000	368500000	291810000	290150000	345720000	314480000	313330000	305300000
P07900;P07900-2;Q86U12;G3V2J8;Q14568;Q58FG0	Heat shock protein HSP 90-alpha	HSP90AA1	>sp|P07900|HS90A_HUMAN Heat shock protein HSP 90-alpha OS=Homo sapiens GN=HSP90AA1 PE=1 SV=5;>sp|P07900-2|HS90A_HUMAN Isoform 2 of Heat shock protein HSP 90-alpha OS=Homo sapiens GN=HSP90AA1;>tr|Q86U12|Q86U12_HUMAN Full-length cDNA clone CS0CAP007YF18 of T	1226700000	1279900000	4086700000	4400400000	1761400000	1745300000	1824700000	1816600000	2200300000	2488300000	1836500000	1736900000	1418000000	1450200000	1597400000	1834000000	2158600000	2180700000	1150700000	1113700000	1458100000	1393100000	1546600000	1514900000
P08107;P08107-2;E7EP94;V9GZ37	Heat shock 70 kDa protein 1A/1B	HSPA1A	>sp|P08107|HSP71_HUMAN Heat shock 70 kDa protein 1A/1B OS=Homo sapiens GN=HSPA1A PE=1 SV=5;>sp|P08107-2|HSP71_HUMAN Isoform 2 of Heat shock 70 kDa protein 1A/1B OS=Homo sapiens GN=HSPA1A;>tr|E7EP94|E7EP94_HUMAN Heat shock 70 kDa protein 1A/1B OS=Homo sapie	2001100000	1783500000	2092300000	2289000000	1938900000	1837900000	1911200000	1810900000	2187500000	2195000000	2136700000	2110400000	2393100000	2705300000	3035300000	3293700000	2941800000	2647300000	2392200000	2640900000	2656600000	2997100000	2973400000	2922600000
P08123	Collagen alpha-2(I) chain	COL1A2	>sp|P08123|CO1A2_HUMAN Collagen alpha-2(I) chain OS=Homo sapiens GN=COL1A2 PE=1 SV=7	17074000	2041500	1	1	1471300	1240900	22698000	74082000	1	1	1282500	1	1	220140	314000	1	1	1	1	1312100	1	1	231720	1
P08195-2;P08195-3;F5GZS6;P08195;J3KPF3;P08195-4;H0YFS2;F5H0E2;F5GZI0;F5H867	4F2 cell-surface antigen heavy chain	SLC3A2	>sp|P08195-2|4F2_HUMAN Isoform 2 of 4F2 cell-surface antigen heavy chain OS=Homo sapiens GN=SLC3A2;>sp|P08195-3|4F2_HUMAN Isoform 3 of 4F2 cell-surface antigen heavy chain OS=Homo sapiens GN=SLC3A2;>tr|F5GZS6|F5GZS6_HUMAN 4F2 cell-surface antigen heavy cha	10997000	18806000	57345000	48782000	10101000	21720000	32001000	19035000	27206000	20580000	22857000	44934000	35316000	44389000	51888000	43073000	70576000	52415000	27531000	31129000	1	59254000	54517000	76244000
P08238;Q58FF7;Q5T9W8	Heat shock protein HSP 90-beta	HSP90AB1	>sp|P08238|HS90B_HUMAN Heat shock protein HSP 90-beta OS=Homo sapiens GN=HSP90AB1 PE=1 SV=4	721940000	704010000	2110300000	2028200000	892720000	896970000	945130000	837520000	1115100000	1069000000	962970000	1002300000	865760000	908070000	1069200000	1002500000	1312200000	1425800000	652770000	644690000	770570000	862460000	905450000	812750000
P08240-2;P08240	Signal recognition particle receptor subunit alpha	SRPR	>sp|P08240-2|SRPR_HUMAN Isoform 2 of Signal recognition particle receptor subunit alpha OS=Homo sapiens GN=SRPR;>sp|P08240|SRPR_HUMAN Signal recognition particle receptor subunit alpha OS=Homo sapiens GN=SRPR PE=1 SV=2	1	2562500	1	1	2849000	1	5677200	1	3885800	2875600	4287900	3028400	4668100	5923600	1	1	3788800	5810300	4541800	3871300	2627600	1	1	3345700
P08243-3;P08243-2;P08243	Asparagine synthetase [glutamine-hydrolyzing]	ASNS	>sp|P08243-3|ASNS_HUMAN Isoform 3 of Asparagine synthetase [glutamine-hydrolyzing] OS=Homo sapiens GN=ASNS;>sp|P08243-2|ASNS_HUMAN Isoform 2 of Asparagine synthetase [glutamine-hydrolyzing] OS=Homo sapiens GN=ASNS;>sp|P08243|ASNS_HUMAN Asparagine synthetas	6864700	9558400	10497000	18842000	7130500	6951600	6931700	4875900	10425000	11235000	6729000	5062900	4808500	5134000	7135300	1	7027000	7148700	1	1	1	1	6017200	5058100
P08559-3;P08559;P08559-2;P08559-4;Q5JPU3;P29803;Q5JPU0;Q5JPT9;Q5JPU1	Pyruvate dehydrogenase E1 component subunit alpha, somatic form, mitochondrial	PDHA1	>sp|P08559-3|ODPA_HUMAN Isoform 3 of Pyruvate dehydrogenase E1 component subunit alpha, somatic form, mitochondrial OS=Homo sapiens GN=PDHA1;>sp|P08559|ODPA_HUMAN Pyruvate dehydrogenase E1 component subunit alpha, somatic form, mitochondrial OS=Homo sapien	27575000	34483000	20193000	1	33064000	25013000	15784000	4063300	16876000	20931000	12390000	20410000	1	10215000	5690600	8139600	18648000	8772900	10165000	9013000	1	7877500	11986000	10675000
P08574	Cytochrome c1, heme protein, mitochondrial	CYC1	>sp|P08574|CY1_HUMAN Cytochrome c1, heme protein, mitochondrial OS=Homo sapiens GN=CYC1 PE=1 SV=3	10147000	5313300	15764000	20476000	10166000	6268700	87731000	67299000	50603000	57724000	102570000	89271000	215620000	180740000	217550000	299500000	152840000	146880000	184510000	149550000	316870000	323590000	189240000	206940000
P08579	U2 small nuclear ribonucleoprotein B	SNRPB2	>sp|P08579|RU2B_HUMAN U2 small nuclear ribonucleoprotein B OS=Homo sapiens GN=SNRPB2 PE=1 SV=1	112540000	134450000	1	1	106260000	115180000	61030000	61828000	54013000	57773000	55448000	67371000	42950000	43652000	22153000	13845000	32981000	34770000	46346000	55686000	25128000	19873000	45203000	43355000
P08621;P08621-2;P08621-3;M0QYR1;P08621-4;M0QX04	U1 small nuclear ribonucleoprotein 70 kDa	SNRNP70	>sp|P08621|RU17_HUMAN U1 small nuclear ribonucleoprotein 70 kDa OS=Homo sapiens GN=SNRNP70 PE=1 SV=2;>sp|P08621-2|RU17_HUMAN Isoform 2 of U1 small nuclear ribonucleoprotein 70 kDa OS=Homo sapiens GN=SNRNP70;>sp|P08621-3|RU17_HUMAN Isoform 3 of U1 small nuc	233510000	213280000	36252000	1	233650000	213170000	548020000	541470000	370290000	259680000	343500000	372210000	515030000	535610000	461700000	483740000	428820000	401940000	478730000	547980000	644460000	607330000	500220000	491520000
P08670;B0YJC4;B0YJC5;Q5JVS8;H7C5W5;P41219;P41219-2;K7EKH6;F8W835;Q16352;P07197-2;P07196;E7EMV2;E7ESP9;P07197	Vimentin	VIM	>sp|P08670|VIME_HUMAN Vimentin OS=Homo sapiens GN=VIM PE=1 SV=4;>tr|B0YJC4|B0YJC4_HUMAN Vimentin OS=Homo sapiens GN=VIM PE=3 SV=1	603530000	571530000	154130000	237270000	549450000	540160000	275980000	277700000	197570000	184740000	325610000	275230000	170740000	197830000	196990000	232490000	160620000	142570000	544340000	513620000	153110000	149710000	135580000	160310000
P08727;CON__P08727;C9JM50;K7EMS3	Keratin, type I cytoskeletal 19	KRT19	>sp|P08727|K1C19_HUMAN Keratin, type I cytoskeletal 19 OS=Homo sapiens GN=KRT19 PE=1 SV=4;>P08727 SWISS-PROT:P08727 Tax_Id=9606 Gene_Symbol=KRT19 Keratin, type I cytoskeletal 19;>tr|C9JM50|C9JM50_HUMAN Keratin, type I cytoskeletal 19 (Fragment) OS=Homo sap	3027400	1	8620600	146240000	3712700	1	1	2353200	1	1	2575400	1	53207000	46178000	1987700	2492800	1	1	1	1	2567300	522310	1544900	1587900
P08758;D6RBE9;D6RBL5;E9PHT9;D6RCN3	Annexin A5;Annexin	ANXA5	>sp|P08758|ANXA5_HUMAN Annexin A5 OS=Homo sapiens GN=ANXA5 PE=1 SV=2;>tr|D6RBE9|D6RBE9_HUMAN Annexin OS=Homo sapiens GN=ANXA5 PE=2 SV=1;>tr|D6RBL5|D6RBL5_HUMAN Annexin OS=Homo sapiens GN=ANXA5 PE=2 SV=1	10975000	9654800	36360000	140630000	15016000	21694000	29421000	22009000	44519000	32428000	54817000	42372000	8509800	15432000	17188000	17856000	50210000	45814000	11135000	8425400	8400500	10411000	16621000	16822000
P08779;CON__P08779;CON__Q9Z2K1;CON__Q3ZAW8;K7ENW6	Keratin, type I cytoskeletal 16	KRT16	>sp|P08779|K1C16_HUMAN Keratin, type I cytoskeletal 16 OS=Homo sapiens GN=KRT16 PE=1 SV=4;>P08779 SWISS-PROT:P08779 Tax_Id=9606 Gene_Symbol=KRT16 Keratin, type I cytoskeletal 16	2871700	1	15461000	15753000	7563700	8096900	1039200	1735400	7539700	13931000	266110000	238390000	3775600	2531100	6323800	5795000	120690000	53417000	5914100	7305800	962460	1961700	5303700	4850600
P09012;M0R221;M0R2B8;M0QXK2;M0QZG7;M0R268;M0R0G9	U1 small nuclear ribonucleoprotein A	SNRPA	>sp|P09012|SNRPA_HUMAN U1 small nuclear ribonucleoprotein A OS=Homo sapiens GN=SNRPA PE=1 SV=3;>tr|M0R221|M0R221_HUMAN U1 small nuclear ribonucleoprotein A (Fragment) OS=Homo sapiens GN=SNRPA PE=2 SV=1;>tr|M0R2B8|M0R2B8_HUMAN U1 small nuclear ribonucleopro	26434000	39556000	6169700	11626000	42628000	52438000	67612000	55529000	60393000	53742000	70716000	110230000	41125000	42549000	30144000	22486000	43235000	34729000	60063000	47234000	27324000	31970000	55784000	43797000
P09211;A8MX94	Glutathione S-transferase P	GSTP1	>sp|P09211|GSTP1_HUMAN Glutathione S-transferase P OS=Homo sapiens GN=GSTP1 PE=1 SV=2;>tr|A8MX94|A8MX94_HUMAN Glutathione S-transferase P OS=Homo sapiens GN=GSTP1 PE=2 SV=1	53113000	57847000	226760000	219600000	53985000	53593000	45758000	48681000	57124000	95929000	81308000	98779000	75914000	65335000	76733000	62638000	122030000	125320000	38311000	24794000	58504000	48029000	67965000	76898000
P09234;Q5TAL2	U1 small nuclear ribonucleoprotein C	SNRPC	>sp|P09234|RU1C_HUMAN U1 small nuclear ribonucleoprotein C OS=Homo sapiens GN=SNRPC PE=1 SV=1;>tr|Q5TAL2|Q5TAL2_HUMAN U1 small nuclear ribonucleoprotein C OS=Homo sapiens GN=SNRPC PE=2 SV=1	14812000	17128000	13769000	12066000	18121000	3973100	29991000	18181000	13699000	13576000	17446000	13135000	13790000	16909000	15750000	19309000	20968000	21660000	12744000	19651000	16541000	17555000	19769000	17807000
P09429;Q5T7C4;Q5T7C6;B2RPK0;Q5T7C0;P23497	High mobility group protein B1	HMGB1	>sp|P09429|HMGB1_HUMAN High mobility group protein B1 OS=Homo sapiens GN=HMGB1 PE=1 SV=3;>tr|Q5T7C4|Q5T7C4_HUMAN High mobility group protein B1 OS=Homo sapiens GN=HMGB1 PE=4 SV=1;>tr|Q5T7C6|Q5T7C6_HUMAN High mobility group protein B1 (Fragment) OS=Homo sap	83591000	102430000	343170000	347680000	137120000	136250000	93741000	84820000	195120000	163380000	143310000	156200000	78637000	92652000	87380000	66790000	154630000	135280000	69077000	62095000	51580000	54391000	74156000	85749000
P09496-2;P09496-4;P09496-3;P09496;F8WF69;P09496-5;C9J8P9	Clathrin light chain A	CLTA	>sp|P09496-2|CLCA_HUMAN Isoform Non-brain of Clathrin light chain A OS=Homo sapiens GN=CLTA;>sp|P09496-4|CLCA_HUMAN Isoform 4 of Clathrin light chain A OS=Homo sapiens GN=CLTA;>sp|P09496-3|CLCA_HUMAN Isoform 3 of Clathrin light chain A OS=Homo sapiens GN=C	10542000	12117000	12811000	1	14590000	14850000	20083000	17625000	21271000	11204000	12699000	11390000	8886900	10108000	7270100	1	9164900	10303000	8018700	13047000	1	1	15556000	5949000
P09497-2;P09497	Clathrin light chain B	CLTB	>sp|P09497-2|CLCB_HUMAN Isoform Non-brain of Clathrin light chain B OS=Homo sapiens GN=CLTB;>sp|P09497|CLCB_HUMAN Clathrin light chain B OS=Homo sapiens GN=CLTB PE=1 SV=1	3396400	3632800	1	1	4034800	4054100	3589200	1	4034200	1	4295800	6093400	2785400	2789000	1	1	1	1	3481400	1	1	1	3844400	2686600
P09661;H0YMA0;H0YLR3;H0YKK0	U2 small nuclear ribonucleoprotein A	SNRPA1	>sp|P09661|RU2A_HUMAN U2 small nuclear ribonucleoprotein A OS=Homo sapiens GN=SNRPA1 PE=1 SV=2;>tr|H0YMA0|H0YMA0_HUMAN U2 small nuclear ribonucleoprotein A (Fragment) OS=Homo sapiens GN=SNRPA1 PE=4 SV=1;>tr|H0YLR3|H0YLR3_HUMAN U2 small nuclear ribonucleo	167850000	201080000	50628000	59613000	164060000	184990000	113850000	94100000	105020000	108570000	83426000	89458000	64067000	46302000	45520000	26035000	81524000	60808000	71993000	79975000	39737000	63745000	93089000	83199000
P09669	Cytochrome c oxidase subunit 6C	COX6C	>sp|P09669|COX6C_HUMAN Cytochrome c oxidase subunit 6C OS=Homo sapiens GN=COX6C PE=1 SV=2	14207000	39740000	9519300	1	30332000	7697400	92169000	93241000	33539000	57887000	103170000	105210000	183890000	170920000	134930000	152250000	149300000	184040000	119620000	149870000	169830000	133270000	154040000	127220000
P09874;Q5VX84;Q5VX85	Poly [ADP-ribose] polymerase 1	PARP1	>sp|P09874|PARP1_HUMAN Poly [ADP-ribose] polymerase 1 OS=Homo sapiens GN=PARP1 PE=1 SV=4	1745800000	1768400000	2503700000	2475700000	882760000	866320000	1213300000	1193400000	2367300000	2498300000	1798500000	1792900000	841050000	795250000	750190000	937800000	912550000	917420000	4930100000	4757800000	1168200000	1186700000	2007400000	2039200000
P0CW22;P08708;H0YN88;H0YK46;H0YN73;H3BNC9	40S ribosomal protein S17-like;40S ribosomal protein S17	RPS17L;RPS17	>sp|P0CW22|RS17L_HUMAN 40S ribosomal protein S17-like OS=Homo sapiens GN=RPS17L PE=1 SV=1;>sp|P08708|RS17_HUMAN 40S ribosomal protein S17 OS=Homo sapiens GN=RPS17 PE=1 SV=2;>tr|H0YN88|H0YN88_HUMAN 40S ribosomal protein S17 OS=Homo sapiens GN=RPS17L PE=3 SV	252440000	364450000	175720000	145210000	294790000	268380000	361810000	359090000	306250000	282740000	304070000	311850000	344130000	401460000	505580000	691630000	410880000	267870000	319220000	362340000	509870000	570450000	587370000	429910000
P10398;P10398-2;B4DMG5	Serine/threonine-protein kinase A-Raf	ARAF	>sp|P10398|ARAF_HUMAN Serine/threonine-protein kinase A-Raf OS=Homo sapiens GN=ARAF PE=1 SV=2	1	1	3268100	40385000	1804800	1	98919000	103470000	45043000	50784000	36883000	32979000	104610000	135480000	153400000	116320000	127970000	119730000	101400000	161210000	299690000	206340000	184980000	174080000
P10412;Q02539;P22492;P16401	Histone H1.4	HIST1H1E	>sp|P10412|H14_HUMAN Histone H1.4 OS=Homo sapiens GN=HIST1H1E PE=1 SV=2	42699000	38447000	1	640380	4132900	34637000	21528000	12394000	5723900	1593700	8579800	9543100	9062300	2657500	1	1939600	4437100	3295800	5654500	6993900	1251400	1405900	1856800	1784000
P10599;P10599-2	Thioredoxin	TXN	>sp|P10599|THIO_HUMAN Thioredoxin OS=Homo sapiens GN=TXN PE=1 SV=3;>sp|P10599-2|THIO_HUMAN Isoform 2 of Thioredoxin OS=Homo sapiens GN=TXN	184610000	243330000	208100000	217620000	193410000	144160000	158420000	130640000	221170000	228490000	136380000	139300000	106930000	133670000	111270000	114480000	158780000	185530000	129650000	108600000	113720000	107360000	163140000	175930000
P10606	Cytochrome c oxidase subunit 5B, mitochondrial	COX5B	>sp|P10606|COX5B_HUMAN Cytochrome c oxidase subunit 5B, mitochondrial OS=Homo sapiens GN=COX5B PE=1 SV=2	12172000	10966000	23245000	24235000	19540000	18998000	31211000	26242000	23051000	24283000	22531000	21099000	60754000	80670000	59004000	72148000	60260000	68714000	31342000	41701000	76396000	70449000	57456000	53031000
P10644-2;P10644;K7EPB2;K7EM13;K7EIE5;K7EID3;K7EJ40;K7EK41;K7EKR1;K7EPR5;K7EQK3;K7EMU2;K7EMZ6;H7BYW5;C9JSK5;P31321	cAMP-dependent protein kinase type I-alpha regulatory subunit;cAMP-dependent protein kinase type I-alpha regulatory subunit, N-terminally processed	PRKAR1A	>sp|P10644-2|KAP0_HUMAN Isoform 2 of cAMP-dependent protein kinase type I-alpha regulatory subunit OS=Homo sapiens GN=PRKAR1A;>sp|P10644|KAP0_HUMAN cAMP-dependent protein kinase type I-alpha regulatory subunit OS=Homo sapiens GN=PRKAR1A PE=1 SV=1;>tr|K7EPB	80274000	97426000	54966000	29613000	88068000	97640000	130920000	139980000	123200000	107360000	104270000	131930000	111030000	108820000	78315000	64398000	88460000	97094000	111400000	108860000	144000000	126500000	110490000	115570000
P10809;E7EXB4;E7ESH4;B7Z712;C9JL25;C9JL19;C9JCQ4;C9J0S9	60 kDa heat shock protein, mitochondrial	HSPD1	>sp|P10809|CH60_HUMAN 60 kDa heat shock protein, mitochondrial OS=Homo sapiens GN=HSPD1 PE=1 SV=2	692490000	759400000	1384500000	1589700000	813320000	839410000	1344500000	1303900000	1350900000	1204200000	1123900000	1152500000	1174700000	1174000000	1195100000	1269900000	1466100000	1406000000	993190000	1092400000	1155000000	1218300000	1353000000	1271300000
P11021	78 kDa glucose-regulated protein	HSPA5	>sp|P11021|GRP78_HUMAN 78 kDa glucose-regulated protein OS=Homo sapiens GN=HSPA5 PE=1 SV=2	686350000	671000000	1198000000	1207400000	675780000	737840000	635850000	674930000	689750000	718750000	692210000	683890000	674860000	583960000	611160000	755840000	681600000	723940000	719030000	737920000	1056500000	964320000	834210000	769850000
P11142;E9PKE3;P11142-2;E9PNE6;E9PLF4;P54652;E9PQQ4;E9PQK7;E9PPY6;E9PN25;E9PI65	Heat shock cognate 71 kDa protein	HSPA8	>sp|P11142|HSP7C_HUMAN Heat shock cognate 71 kDa protein OS=Homo sapiens GN=HSPA8 PE=1 SV=1;>tr|E9PKE3|E9PKE3_HUMAN Heat shock cognate 71 kDa protein OS=Homo sapiens GN=HSPA8 PE=2 SV=1;>sp|P11142-2|HSP7C_HUMAN Isoform 2 of Heat shock cognate 71 kDa protein	4082200000	3659100000	4840700000	5461900000	3950900000	3809000000	4266300000	4165200000	4735500000	4854000000	4040700000	3718700000	4334900000	4583600000	4682000000	4491000000	5022300000	4760200000	4772300000	5390100000	7132800000	6551800000	5877700000	6080700000
P11172-3;P11172;P11172-2;E9PFD2	Uridine 5-monophosphate synthase;Orotate phosphoribosyltransferase;Orotidine 5-phosphate decarboxylase	UMPS	>sp|P11172-3|UMPS_HUMAN Isoform 3 of Uridine 5-monophosphate synthase OS=Homo sapiens GN=UMPS;>sp|P11172|UMPS_HUMAN Uridine 5-monophosphate synthase OS=Homo sapiens GN=UMPS PE=1 SV=1;>sp|P11172-2|UMPS_HUMAN Isoform 2 of Uridine 5-monophosphate synthase	4097600	4613000	12584000	1	5705300	6707200	1	9127600	13113000	1	10582000	9882600	7560400	9012800	7602800	10376000	13124000	10961000	5514400	5104500	1	4992600	6279900	9563800
P11177-2;P11177;P11177-3;C9J634;F8WF02	Pyruvate dehydrogenase E1 component subunit beta, mitochondrial	PDHB	>sp|P11177-2|ODPB_HUMAN Isoform 2 of Pyruvate dehydrogenase E1 component subunit beta, mitochondrial OS=Homo sapiens GN=PDHB;>sp|P11177|ODPB_HUMAN Pyruvate dehydrogenase E1 component subunit beta, mitochondrial OS=Homo sapiens GN=PDHB PE=1 SV=3;>sp|P11177-	53323000	67716000	32671000	33326000	71663000	73080000	48241000	46209000	49858000	47929000	43294000	37087000	43030000	41449000	25944000	14778000	64483000	60572000	20377000	31075000	37116000	28187000	53824000	42277000
P11182;Q5VVL7	Lipoamide acyltransferase component of branched-chain alpha-keto acid dehydrogenase complex, mitochondrial	DBT	>sp|P11182|ODB2_HUMAN Lipoamide acyltransferase component of branched-chain alpha-keto acid dehydrogenase complex, mitochondrial OS=Homo sapiens GN=DBT PE=1 SV=3;>tr|Q5VVL7|Q5VVL7_HUMAN Lipoamide acyltransferase component of branched-chain alpha-keto acid	13460000	11483000	6449900	1	4407900	5433500	7318500	1	23834000	18714000	6432200	8909400	3785100	5398900	3584300	1	6332200	5413200	31882000	27314000	3184600	2774300	6003800	6596200
P11233;H7C3P7;C9JPE8;P11234;Q6ZS74;B4E040;F8WEQ6;C9JYR1;C9J6B1;C9JQB3	Ras-related protein Ral-A	RALA	>sp|P11233|RALA_HUMAN Ras-related protein Ral-A OS=Homo sapiens GN=RALA PE=1 SV=1;>tr|H7C3P7|H7C3P7_HUMAN Ras-related protein Ral-A (Fragment) OS=Homo sapiens GN=RALA PE=4 SV=1	23692000	16724000	140980000	171200000	11322000	11963000	56502000	33850000	36279000	29658000	34448000	21216000	80934000	92795000	45454000	49578000	72818000	59787000	69136000	86728000	57723000	69429000	82231000	88589000
P11387;E5RJ95;E5RFS0;E5RJ33;H0YBR3;H0YC03;E5RGE7;E5RGR4;E5RFE3;E5RGR2	DNA topoisomerase 1	TOP1	>sp|P11387|TOP1_HUMAN DNA topoisomerase 1 OS=Homo sapiens GN=TOP1 PE=1 SV=2	188930000	114880000	16583000	22514000	99694000	136950000	81880000	105790000	58781000	71228000	78534000	79920000	68213000	78284000	61023000	69399000	70029000	68494000	153340000	138610000	80089000	69842000	76753000	66111000
P11388;P11388-2;P11388-3;P11388-4;J3KTB7;E9PCY5;Q02880-2;Q02880	DNA topoisomerase 2-alpha;DNA topoisomerase 2;DNA topoisomerase 2-beta	TOP2A;TOP2B	>sp|P11388|TOP2A_HUMAN DNA topoisomerase 2-alpha OS=Homo sapiens GN=TOP2A PE=1 SV=3;>sp|P11388-2|TOP2A_HUMAN Isoform 2 of DNA topoisomerase 2-alpha OS=Homo sapiens GN=TOP2A;>sp|P11388-3|TOP2A_HUMAN Isoform 3 of DNA topoisomerase 2-alpha OS=Homo sapiens GN=	1	2987100	1	1	2872300	1	1	1	1	1	1	1	1	1	1	1	1	1	7478100	1	1	1	1	1
P11586;F5H2F4;V9GYY3	C-1-tetrahydrofolate synthase, cytoplasmic;Methylenetetrahydrofolate dehydrogenase;Methenyltetrahydrofolate cyclohydrolase;Formyltetrahydrofolate synthetase;C-1-tetrahydrofolate synthase, cytoplasmic, N-terminally processed	MTHFD1	>sp|P11586|C1TC_HUMAN C-1-tetrahydrofolate synthase, cytoplasmic OS=Homo sapiens GN=MTHFD1 PE=1 SV=3;>tr|F5H2F4|F5H2F4_HUMAN C-1-tetrahydrofolate synthase, cytoplasmic OS=Homo sapiens GN=MTHFD1 PE=2 SV=1	53664000	44864000	83400000	63924000	64000000	91025000	84137000	79864000	123070000	133440000	111390000	61368000	72119000	63178000	25865000	21483000	117260000	113190000	41223000	39040000	17881000	17793000	66993000	43842000
P11908;P11908-2;A6NMS2;D3YTJ7	Ribose-phosphate pyrophosphokinase 2	PRPS2	>sp|P11908|PRPS2_HUMAN Ribose-phosphate pyrophosphokinase 2 OS=Homo sapiens GN=PRPS2 PE=1 SV=2;>sp|P11908-2|PRPS2_HUMAN Isoform 2 of Ribose-phosphate pyrophosphokinase 2 OS=Homo sapiens GN=PRPS2	20820000	44416000	14594000	1	27591000	29651000	19654000	19266000	15360000	12746000	7878700	7386600	6419300	6098300	6237000	8882500	10249000	5332100	1	1	1893400	1	4430700	4051800
P11940;P11940-2;E7EQV3;E7ERJ7;H0YAR2;Q9H361;H0YBN4;H0YAP2;H0YB86;Q4VXU2;E5RGH3;E5RH24;E5RJB9;H0YAS6;H0YB75;Q4VY17;H0YAS7;H0YC10;E5RHG7;Q96DU9-2;Q96DU9;E5RGC4;E5RFD8;H0YAW6	Polyadenylate-binding protein 1;Polyadenylate-binding protein 3	PABPC1;PABPC3	>sp|P11940|PABP1_HUMAN Polyadenylate-binding protein 1 OS=Homo sapiens GN=PABPC1 PE=1 SV=2;>sp|P11940-2|PABP1_HUMAN Isoform 2 of Polyadenylate-binding protein 1 OS=Homo sapiens GN=PABPC1;>tr|E7EQV3|E7EQV3_HUMAN Polyadenylate-binding protein 1 OS=Homo sapie	2819800000	2395300000	1880300000	1835800000	2460300000	2148900000	1695400000	1687700000	1615500000	1578900000	1426400000	1350600000	1013900000	1146000000	1080400000	1231100000	1147200000	1254100000	1111700000	1164000000	1130100000	1122600000	1224000000	1135900000
P12004	Proliferating cell nuclear antigen	PCNA	>sp|P12004|PCNA_HUMAN Proliferating cell nuclear antigen OS=Homo sapiens GN=PCNA PE=1 SV=1	54479000	57662000	84295000	132000000	85170000	80025000	63393000	68261000	97354000	90215000	121280000	93357000	71202000	75334000	93343000	111600000	134240000	115750000	60515000	51782000	67599000	80089000	80799000	84856000
P12081-3;P12081-2;P12081-4;P12081;D6RF05;D6RJE6;E7ETE2;B4E1C5;B4DDD8;B3KWE1;C9JV49;B4DDY8;P49590	Histidine--tRNA ligase, cytoplasmic;Probable histidine--tRNA ligase, mitochondrial	HARS;HARS2	>sp|P12081-3|SYHC_HUMAN Isoform 3 of Histidine--tRNA ligase, cytoplasmic OS=Homo sapiens GN=HARS;>sp|P12081-2|SYHC_HUMAN Isoform 2 of Histidine--tRNA ligase, cytoplasmic OS=Homo sapiens GN=HARS;>sp|P12081-4|SYHC_HUMAN Isoform 4 of Histidine--tRNA ligase, c	1	1	1	1	1	1	1	1	1	1	1	3467800	1	1	1	1	1	1	1	1	1	1	1	1
P12235;V9GYG0	ADP/ATP translocase 1	SLC25A4	>sp|P12235|ADT1_HUMAN ADP/ATP translocase 1 OS=Homo sapiens GN=SLC25A4 PE=1 SV=4;>tr|V9GYG0|V9GYG0_HUMAN ADP/ATP translocase 1 OS=Homo sapiens GN=SLC25A4 PE=3 SV=1	1	5871700	1	1	7529800	1	8570500	15349000	5971800	9457900	7065100	5819200	14114000	20631000	10984000	17782000	9825400	14476000	10074000	8559300	1	1	9963700	11786000
P12236;I7HJJ0;Q9H0C2	ADP/ATP translocase 3	SLC25A6	>sp|P12236|ADT3_HUMAN ADP/ATP translocase 3 OS=Homo sapiens GN=SLC25A6 PE=1 SV=4	71109000	53288000	56793000	55868000	60532000	43920000	158820000	166360000	81377000	111930000	157600000	90540000	282830000	289650000	342540000	384990000	304410000	226990000	142220000	174450000	285260000	318700000	223110000	332130000
P12270	Nucleoprotein TPR	TPR	>sp|P12270|TPR_HUMAN Nucleoprotein TPR OS=Homo sapiens GN=TPR PE=1 SV=3	1	1	1	1	1	1	6078900	6945800	1	8362200	1	1	7172700	7925400	1	1	3243900	4881800	7556900	5993600	1	1	5724800	6340400
P12273	Prolactin-inducible protein	PIP	>sp|P12273|PIP_HUMAN Prolactin-inducible protein OS=Homo sapiens GN=PIP PE=1 SV=1	1	1	8217600	7379000	1	3460200	4159400	4197200	1	1705000	1998800	3028400	17711000	9169100	2627700	4143200	1	1	1	1	3084300	3059500	1	2664800
P12277;G3V4N7;H0YJG0;G3V461;G3V2I1;H0YJK0;P06732	Creatine kinase B-type	CKB	>sp|P12277|KCRB_HUMAN Creatine kinase B-type OS=Homo sapiens GN=CKB PE=1 SV=1;>tr|G3V4N7|G3V4N7_HUMAN Creatine kinase B-type (Fragment) OS=Homo sapiens GN=CKB PE=2 SV=1	159870000	137640000	766950000	944360000	278620000	260770000	218270000	208420000	391720000	407720000	300980000	288430000	200710000	234030000	343040000	306140000	453780000	518630000	94871000	136390000	202680000	198700000	205520000	208850000
P12956;B1AHC9;B1AHC8;F5H1I8	X-ray repair cross-complementing protein 6	XRCC6	>sp|P12956|XRCC6_HUMAN X-ray repair cross-complementing protein 6 OS=Homo sapiens GN=XRCC6 PE=1 SV=2;>tr|B1AHC9|B1AHC9_HUMAN X-ray repair cross-complementing protein 6 OS=Homo sapiens GN=XRCC6 PE=2 SV=1;>tr|B1AHC8|B1AHC8_HUMAN X-ray repair complementing de	520330000	602650000	917680000	860620000	441800000	397520000	510230000	534170000	656820000	797220000	511500000	551640000	403460000	443660000	457340000	470250000	432540000	431010000	1043700000	1229300000	437640000	617330000	542860000	558640000
P13010;C9JZ81;H7C0H9	X-ray repair cross-complementing protein 5	XRCC5	>sp|P13010|XRCC5_HUMAN X-ray repair cross-complementing protein 5 OS=Homo sapiens GN=XRCC5 PE=1 SV=3	280350000	275400000	493610000	463150000	200410000	215910000	290360000	254690000	447170000	428750000	333300000	333690000	218800000	229660000	222990000	211270000	266480000	261230000	653450000	688840000	278210000	320970000	287750000	264710000
P13073;H3BN72;H3BNV9;Q86WV2;H3BPG0;H3BNI5	Cytochrome c oxidase subunit 4 isoform 1, mitochondrial	COX4I1	>sp|P13073|COX41_HUMAN Cytochrome c oxidase subunit 4 isoform 1, mitochondrial OS=Homo sapiens GN=COX4I1 PE=1 SV=1;>tr|H3BN72|H3BN72_HUMAN Cytochrome c oxidase subunit 4 isoform 1, mitochondrial OS=Homo sapiens GN=COX4I1 PE=2 SV=1;>tr|H3BNV9|H3BNV9_HUMAN C	30664000	40061000	85749000	87063000	45372000	34887000	88317000	78733000	69133000	83235000	94692000	111140000	179720000	156950000	138700000	159080000	175790000	182720000	145020000	120060000	192420000	185710000	144810000	157410000
P13639	Elongation factor 2	EEF2	>sp|P13639|EF2_HUMAN Elongation factor 2 OS=Homo sapiens GN=EEF2 PE=1 SV=4	507500000	559340000	1785900000	1591700000	751610000	747130000	638010000	658250000	1022000000	993960000	700370000	778460000	523500000	540590000	583930000	533160000	920310000	924230000	390190000	405700000	385390000	399210000	652980000	591110000
P13645;CON__P13645;Q7Z3Y7;CON__Q7Z3Y7;Q7Z3Y8;CON__Q7Z3Y8;Q2M2I5;CON__Q2M2I5;CON__P05784;Q7Z3Z0;CON__Q7Z3Z0;O76013-2;Q14532;CON__Q14532;O76014;CON__A2AB72;O76015;CON__O76015;O76013;CON__O76013;Q7Z3Y9;CON__Q7Z3Y9;CON__O76014;CON__REFSEQ:XP_986630	Keratin, type I cytoskeletal 10	KRT10	>sp|P13645|K1C10_HUMAN Keratin, type I cytoskeletal 10 OS=Homo sapiens GN=KRT10 PE=1 SV=6;>P13645 SWISS-PROT:P13645 Tax_Id=9606 Gene_Symbol=KRT10 Keratin, type I cytoskeletal 10	658270000	751180000	10292000000	10261000000	7933000000	7836500000	3621700000	3754400000	7652300000	7309000000	27642000000	28657000000	2626200000	2543800000	3921400000	3714400000	2088000000	2288500000	7708300000	7957800000	1283100000	1149000000	5167500000	5186500000
P13647;CON__P13647;F8W0C6;H0YI76;H0YIN9;F8VV57;F8VU69	Keratin, type II cytoskeletal 5	KRT5	>sp|P13647|K2C5_HUMAN Keratin, type II cytoskeletal 5 OS=Homo sapiens GN=KRT5 PE=1 SV=3;>P13647 SWISS-PROT:P13647 Tax_Id=9606 Gene_Symbol=KRT5 Keratin, type II cytoskeletal 5	54412000	58600000	1089100000	1032400000	516080000	471480000	222930000	228240000	622030000	541780000	2594100000	2582700000	270230000	245130000	250310000	297520000	212440000	260000000	491970000	436610000	32494000	39672000	364060000	375770000
P13667	Protein disulfide-isomerase A4	PDIA4	>sp|P13667|PDIA4_HUMAN Protein disulfide-isomerase A4 OS=Homo sapiens GN=PDIA4 PE=1 SV=2	10408000	10500000	20122000	35317000	19811000	17856000	16763000	24957000	29800000	24726000	29019000	20428000	13208000	12050000	18763000	1	29916000	35108000	1	7635000	14328000	1	16812000	17821000
P13693;Q5W0H4;P13693-2;J3KPG2;E9PJF7;Q56UQ5;H0YCX0;Q9HAU6	Translationally-controlled tumor protein;TPT1-like protein	TPT1	>sp|P13693|TCTP_HUMAN Translationally-controlled tumor protein OS=Homo sapiens GN=TPT1 PE=1 SV=1;>tr|Q5W0H4|Q5W0H4_HUMAN Translationally-controlled tumor protein OS=Homo sapiens GN=TPT1 PE=1 SV=1;>sp|P13693-2|TCTP_HUMAN Isoform 2 of Translationally-control	20400000	20264000	54572000	81059000	40585000	26544000	36369000	37070000	53371000	57960000	40009000	37426000	39673000	33903000	35335000	45288000	50790000	54913000	26195000	21955000	18892000	16617000	34528000	28110000
P13797;B7Z6M1;B4DGB4;F8W8D8;B4DI60;U3KQI3;H7C4N2;Q14651;F2Z2Z9;Q5TBN3;C9JAM8;P13796	Plastin-3	PLS3	>sp|P13797|PLST_HUMAN Plastin-3 OS=Homo sapiens GN=PLS3 PE=1 SV=4;>tr|B7Z6M1|B7Z6M1_HUMAN Plastin-3 OS=Homo sapiens GN=PLS3 PE=2 SV=1;>tr|B4DGB4|B4DGB4_HUMAN Plastin-3 OS=Homo sapiens GN=PLS3 PE=2 SV=1;>tr|F8W8D8|F8W8D8_HUMAN Plastin-3 OS=Homo sapiens GN=P	28593000	54888000	295320000	264790000	95678000	74407000	96110000	71276000	168380000	175340000	110590000	68185000	65585000	65258000	69635000	44039000	111810000	129020000	40042000	44639000	27354000	24740000	67362000	70968000
P13984	General transcription factor IIF subunit 2	GTF2F2	>sp|P13984|T2FB_HUMAN General transcription factor IIF subunit 2 OS=Homo sapiens GN=GTF2F2 PE=1 SV=2	13991000	22721000	8250200	1	18556000	14713000	7332800	8373500	10505000	8649600	8909200	10081000	6046600	6956600	1	1	1	1	5067600	7773300	1	1	1	6906000
P14174	Macrophage migration inhibitory factor	MIF	>sp|P14174|MIF_HUMAN Macrophage migration inhibitory factor OS=Homo sapiens GN=MIF PE=1 SV=4	20915000	17295000	133200000	120410000	23338000	27727000	35236000	17077000	44132000	49307000	30826000	21993000	15082000	22506000	36937000	1	51241000	56779000	10486000	14224000	15630000	13644000	20328000	26994000
P14314-2;P14314;K7ELL7;K7EPW7;K7EKX1;K7EJ70	Glucosidase 2 subunit beta	PRKCSH	>sp|P14314-2|GLU2B_HUMAN Isoform 2 of Glucosidase 2 subunit beta OS=Homo sapiens GN=PRKCSH;>sp|P14314|GLU2B_HUMAN Glucosidase 2 subunit beta OS=Homo sapiens GN=PRKCSH PE=1 SV=2;>tr|K7ELL7|K7ELL7_HUMAN Glucosidase 2 subunit beta OS=Homo sapiens GN=PRKCSH PE	19812000	7800000	83994000	45285000	35682000	50949000	30845000	37611000	56235000	44391000	33482000	30267000	38089000	24320000	46904000	23894000	56448000	62376000	22804000	25685000	27841000	23709000	19553000	15137000
P14324-2;P14324	Farnesyl pyrophosphate synthase	FDPS	>sp|P14324-2|FPPS_HUMAN Isoform 2 of Farnesyl pyrophosphate synthase OS=Homo sapiens GN=FDPS;>sp|P14324|FPPS_HUMAN Farnesyl pyrophosphate synthase OS=Homo sapiens GN=FDPS PE=1 SV=4	4811200	6704800	19282000	15962000	8427200	8704300	7868500	7284100	15529000	16551000	35401000	30760000	21130000	10901000	10084000	9519200	13644000	15531000	8960400	6360200	6172700	5324100	1	16301000
P14406;D6RIE3;D6RGV5;H0UI06;D6R9C3	Cytochrome c oxidase subunit 7A2, mitochondrial	COX7A2	>sp|P14406|CX7A2_HUMAN Cytochrome c oxidase subunit 7A2, mitochondrial OS=Homo sapiens GN=COX7A2 PE=1 SV=1;>tr|D6RIE3|D6RIE3_HUMAN Uncharacterized protein OS=Homo sapiens GN=COX7A2 PE=4 SV=1;>tr|D6RGV5|D6RGV5_HUMAN Cytochrome c oxidase subunit 7A2, mitocho	1	6697200	20824000	29297000	9200800	12359000	37295000	44005000	23246000	1	23640000	31073000	67570000	107060000	109110000	99882000	97939000	110970000	48286000	62336000	118200000	123070000	68512000	69184000
P14618;P14618-2;P14618-3;H3BTN5;H3BQ34;Q504U3;H3BT25;H3BUW1;H3BTJ2;H3BU13;H3BN34;H3BQZ3;P30613-2;P30613	Pyruvate kinase PKM;Pyruvate kinase	PKM	>sp|P14618|KPYM_HUMAN Pyruvate kinase PKM OS=Homo sapiens GN=PKM PE=1 SV=4;>sp|P14618-2|KPYM_HUMAN Isoform M1 of Pyruvate kinase PKM OS=Homo sapiens GN=PKM;>sp|P14618-3|KPYM_HUMAN Isoform 3 of Pyruvate kinase PKM OS=Homo sapiens GN=PKM;>tr|H3BTN5|H3BTN5_HU	222670000	223590000	988750000	935320000	356780000	343080000	280840000	301580000	513110000	500930000	419190000	405510000	297190000	325120000	373270000	468670000	532560000	524130000	210650000	214350000	229760000	286110000	377300000	357670000
P14625;F8W026;Q58FF3;H0YIV0	Endoplasmin	HSP90B1	>sp|P14625|ENPL_HUMAN Endoplasmin OS=Homo sapiens GN=HSP90B1 PE=1 SV=1	113470000	94394000	365280000	345070000	153520000	185280000	192160000	161890000	266680000	243170000	194570000	185470000	160170000	155370000	207540000	232830000	230820000	232010000	95340000	115590000	118810000	156670000	147410000	166160000
P14678-2;P14678;P14678-3;J3QLE5;P63162;B3KVR1;J3KRY3;S4R3P3;A8MT02	Small nuclear ribonucleoprotein-associated proteins B and B;Small nuclear ribonucleoprotein-associated protein N;Small nuclear ribonucleoprotein-associated protein	SNRPB;SNRPN	>sp|P14678-2|RSMB_HUMAN Isoform SM-B of Small nuclear ribonucleoprotein-associated proteins B and B OS=Homo sapiens GN=SNRPB;>sp|P14678|RSMB_HUMAN Small nuclear ribonucleoprotein-associated proteins B and B OS=Homo sapiens GN=SNRPB PE=1 SV=2;>sp|P14678-3	2306300000	2277600000	171900000	238030000	2199800000	2192200000	920840000	1061200000	745150000	793940000	949140000	939630000	497350000	644220000	461050000	461460000	407940000	503230000	416040000	436720000	706260000	731850000	633580000	552820000
P14859-4;P14859-5;P14859-3;P14859;P14859-2;P14859-6;H0YLC5;U3KQN1;U3KQ96;P09086-4;H0YNW1;Q9UKI9-3;Q9UKI9;Q9UKI9-2;P09086-3;P09086-2;P09086;H0YLL6;E9PNC9;P09086-5;B5ME60;H0YKT2	POU domain, class 2, transcription factor 1;POU domain, class 2, transcription factor 2;POU domain, class 2, transcription factor 3	POU2F1;POU2F3;POU2F2	>sp|P14859-4|PO2F1_HUMAN Isoform 4 of POU domain, class 2, transcription factor 1 OS=Homo sapiens GN=POU2F1;>sp|P14859-5|PO2F1_HUMAN Isoform 5 of POU domain, class 2, transcription factor 1 OS=Homo sapiens GN=POU2F1;>sp|P14859-3|PO2F1_HUMAN Isoform 3 of PO	1	1	1	1	1	1	3488800	3138100	4016000	1	3767800	3408300	2356500	3406800	1	1	1	1	8057500	20623000	1	1	1	1
P14866;M0QXS5;P14866-2;M0QYT0;M0R076;M0R1W6;B4DVF8;M0QYL7	Heterogeneous nuclear ribonucleoprotein L	HNRNPL	>sp|P14866|HNRPL_HUMAN Heterogeneous nuclear ribonucleoprotein L OS=Homo sapiens GN=HNRNPL PE=1 SV=2;>tr|M0QXS5|M0QXS5_HUMAN Heterogeneous nuclear ribonucleoprotein L (Fragment) OS=Homo sapiens GN=HNRNPL PE=4 SV=1;>sp|P14866-2|HNRPL_HUMAN Isoform 2 of Hete	1466700000	1438000000	150500000	157740000	1174300000	1159600000	448790000	455510000	487310000	503460000	430910000	425780000	236760000	197330000	166880000	161200000	181510000	168410000	357850000	359460000	226200000	252120000	252770000	258620000
P14868;Q68CR9;H7BZ35;C9J7S3;C9JLC1;H7C278;C9JQM9	Aspartate--tRNA ligase, cytoplasmic	DARS;DKFZp781B11202	>sp|P14868|SYDC_HUMAN Aspartate--tRNA ligase, cytoplasmic OS=Homo sapiens GN=DARS PE=1 SV=2;>tr|Q68CR9|Q68CR9_HUMAN Aspartate--tRNA ligase, cytoplasmic OS=Homo sapiens GN=DKFZp781B11202 PE=2 SV=1	116140000	131720000	175530000	185710000	150680000	149130000	207270000	179320000	188270000	200360000	190280000	206120000	229850000	190700000	186040000	176760000	201420000	199820000	222750000	161550000	213050000	194410000	209330000	188280000
P14923	Junction plakoglobin	JUP	>sp|P14923|PLAK_HUMAN Junction plakoglobin OS=Homo sapiens GN=JUP PE=1 SV=3	1	1	1	6864300	1	3393800	1560800	1153600	3561400	8319400	17831000	15569000	2391700	1	1	1	1	1	2355400	2124700	1	1	1	1
P15056;H7C5K3	Serine/threonine-protein kinase B-raf	BRAF	>sp|P15056|BRAF_HUMAN Serine/threonine-protein kinase B-raf OS=Homo sapiens GN=BRAF PE=1 SV=4	5427600	1276100	4456100	1	658510	509910	270870000	188340000	134840000	112810000	170960000	158040000	547210000	419670000	496440000	444260000	374270000	258800000	485280000	316760000	289490000	367430000	418100000	280000000
P15121;E9PCX2;E9PEF9;C9JRZ8-2;C9JRZ8	Aldose reductase	AKR1B1	>sp|P15121|ALDR_HUMAN Aldose reductase OS=Homo sapiens GN=AKR1B1 PE=1 SV=3;>tr|E9PCX2|E9PCX2_HUMAN Aldose reductase OS=Homo sapiens GN=AKR1B1 PE=2 SV=1;>tr|E9PEF9|E9PEF9_HUMAN Aldose reductase OS=Homo sapiens GN=AKR1B1 PE=2 SV=1	9609200	14495000	29499000	55499000	12916000	15618000	13101000	10224000	27313000	23987000	19203000	19067000	8907700	8764200	31228000	1	15870000	9545700	6348700	888680	45223000	43260000	1	8486400
P15170-2;P15170-3;H3BR35;P15170;H3BSV8;Q8IYD1	Eukaryotic peptide chain release factor GTP-binding subunit ERF3A	GSPT1	>sp|P15170-2|ERF3A_HUMAN Isoform 2 of Eukaryotic peptide chain release factor GTP-binding subunit ERF3A OS=Homo sapiens GN=GSPT1;>sp|P15170-3|ERF3A_HUMAN Isoform 3 of Eukaryotic peptide chain release factor GTP-binding subunit ERF3A OS=Homo sapiens GN=GSPT	31011000	25140000	28997000	33416000	43552000	50724000	27149000	35092000	15566000	32835000	32237000	34635000	27900000	19512000	23615000	13009000	28768000	35343000	16337000	12036000	19503000	22949000	23055000	30337000
P15311;E7EQR4	Ezrin	EZR	>sp|P15311|EZRI_HUMAN Ezrin OS=Homo sapiens GN=EZR PE=1 SV=4;>tr|E7EQR4|E7EQR4_HUMAN Ezrin OS=Homo sapiens GN=EZR PE=2 SV=2	29977000	24521000	54952000	131690000	37710000	38963000	41550000	22776000	53917000	45414000	59979000	30325000	31067000	16791000	18213000	1	40588000	22901000	22288000	12509000	10013000	12506000	11732000	11719000
P15531;P15531-2	Nucleoside diphosphate kinase A	NME1	>sp|P15531|NDKA_HUMAN Nucleoside diphosphate kinase A OS=Homo sapiens GN=NME1 PE=1 SV=1;>sp|P15531-2|NDKA_HUMAN Isoform 2 of Nucleoside diphosphate kinase A OS=Homo sapiens GN=NME1	6461600	1	15752000	12786000	13646000	9688400	11454000	1	1	22329000	1	1	1	3271700	1	1	6131800	1	1	1	1	1	1	1
P15880;H0YEN5;E9PQD7;I3L404;E9PM36;E9PMM9;E9PPT0;H3BNG3;H0YE27	40S ribosomal protein S2	RPS2	>sp|P15880|RS2_HUMAN 40S ribosomal protein S2 OS=Homo sapiens GN=RPS2 PE=1 SV=2;>tr|H0YEN5|H0YEN5_HUMAN 40S ribosomal protein S2 (Fragment) OS=Homo sapiens GN=RPS2 PE=3 SV=1;>tr|E9PQD7|E9PQD7_HUMAN 40S ribosomal protein S2 OS=Homo sapiens GN=RPS2 PE=4 SV=1	772410000	785010000	785500000	686740000	759210000	800610000	896360000	733510000	804070000	719070000	689930000	753560000	829420000	843100000	842520000	1081100000	808390000	672340000	785180000	836870000	888280000	847990000	862250000	843030000
P15924;P15924-3;P15924-2	Desmoplakin	DSP	>sp|P15924|DESP_HUMAN Desmoplakin OS=Homo sapiens GN=DSP PE=1 SV=3;>sp|P15924-3|DESP_HUMAN Isoform DSPIa of Desmoplakin OS=Homo sapiens GN=DSP;>sp|P15924-2|DESP_HUMAN Isoform DPII of Desmoplakin OS=Homo sapiens GN=DSP	11940000	14860000	195880000	209230000	95719000	88145000	46990000	61661000	127230000	128850000	491870000	515970000	27162000	24635000	9575000	33156000	41381000	13830000	86732000	46576000	11868000	16102000	26589000	29619000
P15927;P15927-2;P15927-3;Q5TEJ0;Q5TEJ7	Replication protein A 32 kDa subunit	RPA2	>sp|P15927|RFA2_HUMAN Replication protein A 32 kDa subunit OS=Homo sapiens GN=RPA2 PE=1 SV=1;>sp|P15927-2|RFA2_HUMAN Isoform 2 of Replication protein A 32 kDa subunit OS=Homo sapiens GN=RPA2;>sp|P15927-3|RFA2_HUMAN Isoform 3 of Replication protein A 32 kDa	14202000	1	6181500	1	14145000	13634000	11961000	1	20241000	16505000	20259000	11021000	6288100	6681200	10061000	10632000	11052000	13592000	83786000	86562000	13316000	13000000	25840000	12121000
P16152;P16152-2;E9PQ63;A8MTM1	Carbonyl reductase [NADPH] 1	CBR1	>sp|P16152|CBR1_HUMAN Carbonyl reductase [NADPH] 1 OS=Homo sapiens GN=CBR1 PE=1 SV=3;>sp|P16152-2|CBR1_HUMAN Isoform 2 of Carbonyl reductase [NADPH] 1 OS=Homo sapiens GN=CBR1;>tr|E9PQ63|E9PQ63_HUMAN Carbonyl reductase [NADPH] 1 OS=Homo sapiens GN=CBR1 PE=2	25013000	25863000	51527000	29166000	24400000	26278000	15457000	17776000	18460000	28242000	16275000	26868000	13487000	17808000	19228000	1	28516000	27733000	9600900	17255000	1	1	14455000	19247000
P16220-3;P16220-2;P16220;E9PAR2;Q03060-23;Q03060-9;Q03060-24;Q03060-8;B4DRF9;Q03060-32;Q03060-26;G5E998;P18846;Q03060-21;C9JK96;Q03060-31;Q03060-6;C9J4L5;B7Z7P1;C9JBT4;H7C3I0;E7EWP8;F5H0V3;C9J896	Cyclic AMP-responsive element-binding protein 1;Cyclic AMP-dependent transcription factor ATF-1	CREB1;CREM;ATF1	>sp|P16220-3|CREB1_HUMAN Isoform 3 of Cyclic AMP-responsive element-binding protein 1 OS=Homo sapiens GN=CREB1;>sp|P16220-2|CREB1_HUMAN Isoform CREB-B of Cyclic AMP-responsive element-binding protein 1 OS=Homo sapiens GN=CREB1;>sp|P16220|CREB1_HUMAN Cyclic	1	2063500	1	2237600	1	1	1	2420900	16883000	3692200	3489300	3117600	1186500	2091200	1	1	753790	1630500	34487000	30696000	2440100	1	1407700	1591700
P16403	Histone H1.2	HIST1H1C	>sp|P16403|H12_HUMAN Histone H1.2 OS=Homo sapiens GN=HIST1H1C PE=1 SV=2	1435900000	1371400000	506650000	430740000	1434800000	1509400000	1197900000	1295500000	825960000	733000000	1091100000	1152600000	812700000	888740000	1107700000	1226200000	1049400000	1086900000	914740000	945990000	1261000000	1071600000	812030000	782520000
P16435;E7EWU0;H0Y4R2	NADPH--cytochrome P450 reductase	POR	>sp|P16435|NCPR_HUMAN NADPH--cytochrome P450 reductase OS=Homo sapiens GN=POR PE=1 SV=2;>tr|E7EWU0|E7EWU0_HUMAN NADPH--cytochrome P450 reductase OS=Homo sapiens GN=POR PE=2 SV=1;>tr|H0Y4R2|H0Y4R2_HUMAN NADPH--cytochrome P450 reductase (Fragment) OS=Homo sa	3460100	7041300	4008200	8011300	4652700	4159300	4501500	7291400	1	1	6137700	9812700	7427700	9646300	1	1	6275300	5987500	1	4729800	6346800	6397400	4110800	3802900
P16615-5;P16615-2;P16615-3;P16615;P16615-4;H7C5W9;O14983-2;O14983;O14983-3;Q93084-4;Q93084-2;Q93084-3;Q93084-7;Q93084;Q93084-6;Q93084-5;J3QSY6;H3BVB2	Sarcoplasmic/endoplasmic reticulum calcium ATPase 2	ATP2A2	>sp|P16615-5|AT2A2_HUMAN Isoform 5 of Sarcoplasmic/endoplasmic reticulum calcium ATPase 2 OS=Homo sapiens GN=ATP2A2;>sp|P16615-2|AT2A2_HUMAN Isoform 2 of Sarcoplasmic/endoplasmic reticulum calcium ATPase 2 OS=Homo sapiens GN=ATP2A2;>sp|P16615-3|AT2A2_HUMAN	21877000	23306000	25833000	28251000	18569000	12037000	143470000	158330000	98234000	96365000	107280000	142310000	270650000	302960000	335350000	376130000	297040000	278460000	175740000	176770000	257810000	237870000	225880000	218400000
P16989-3;P16989;P16989-2;H0YG22	Y-box-binding protein 3	YBX3	>sp|P16989-3|YBOX3_HUMAN Isoform 3 of Y-box-binding protein 3 OS=Homo sapiens GN=YBX3;>sp|P16989|YBOX3_HUMAN Y-box-binding protein 3 OS=Homo sapiens GN=YBX3 PE=1 SV=4;>sp|P16989-2|YBOX3_HUMAN Isoform 2 of Y-box-binding protein 3 OS=Homo sapiens GN=YBX3	41663000	43563000	33594000	33419000	40215000	29374000	42255000	31397000	27493000	27688000	38694000	31328000	34319000	30628000	51934000	52419000	33244000	30030000	24167000	23256000	38800000	79398000	27516000	40197000
P17066;P48741	Heat shock 70 kDa protein 6;Putative heat shock 70 kDa protein 7	HSPA6;HSPA7	>sp|P17066|HSP76_HUMAN Heat shock 70 kDa protein 6 OS=Homo sapiens GN=HSPA6 PE=1 SV=2;>sp|P48741|HSP77_HUMAN Putative heat shock 70 kDa protein 7 OS=Homo sapiens GN=HSPA7 PE=5 SV=2	333850000	357460000	219460000	186450000	362380000	315440000	466040000	430610000	421110000	399210000	393960000	441320000	325320000	338130000	394460000	417210000	290070000	270710000	460580000	402210000	577650000	626500000	388410000	379030000
P17096;P17096-3;H7BYM6;E5RIT9	High mobility group protein HMG-I/HMG-Y	HMGA1	>sp|P17096|HMGA1_HUMAN High mobility group protein HMG-I/HMG-Y OS=Homo sapiens GN=HMGA1 PE=1 SV=3;>sp|P17096-3|HMGA1_HUMAN Isoform HMG-R of High mobility group protein HMG-I/HMG-Y OS=Homo sapiens GN=HMGA1;>tr|H7BYM6|H7BYM6_HUMAN High mobility group protein	24564000	28257000	8843800	9412100	3634500	2781800	14783000	18194000	65747000	63207000	47514000	42330000	3825500	2505300	2960800	2594900	1	1951400	170870000	159200000	10180000	9655400	5055300	5131400
P17096-2	High mobility group protein HMG-I/HMG-Y	HMGA1	>sp|P17096-2|HMGA1_HUMAN Isoform HMG-Y of High mobility group protein HMG-I/HMG-Y OS=Homo sapiens GN=HMGA1	2678900	1	1	1	1	1	1596600	1406900	10259000	7148500	1579100	1744700	1	1047400	953880	1	1	1	19475000	27560000	1306500	1	1	1
P17480-2;E9PKP7	Nucleolar transcription factor 1	UBTF	>sp|P17480-2|UBF1_HUMAN Isoform UBF2 of Nucleolar transcription factor 1 OS=Homo sapiens GN=UBTF;>tr|E9PKP7|E9PKP7_HUMAN Nucleolar transcription factor 1 OS=Homo sapiens GN=UBTF PE=2 SV=1	417300000	398250000	603360000	593610000	127230000	121110000	415750000	435400000	362300000	375980000	323470000	279830000	429730000	468420000	611990000	684270000	414040000	343490000	909600000	1017000000	1014200000	1020300000	607120000	584360000
P17612-2;P17612;P22694-10;Q15136;K7ERP6	cAMP-dependent protein kinase catalytic subunit alpha;cAMP-dependent protein kinase catalytic subunit beta	PRKACA;PRKACB;KIN27	>sp|P17612-2|KAPCA_HUMAN Isoform 2 of cAMP-dependent protein kinase catalytic subunit alpha OS=Homo sapiens GN=PRKACA;>sp|P17612|KAPCA_HUMAN cAMP-dependent protein kinase catalytic subunit alpha OS=Homo sapiens GN=PRKACA PE=1 SV=2;>sp|P22694-10|KAPCB_HUMAN	36874000	5269700	8368600	9473900	34483000	35829000	38346000	37854000	1565400	30489000	27059000	31847000	18789000	15573000	1	21185000	14920000	16231000	26570000	16638000	22604000	1	22272000	19493000
P17661	Desmin	DES	>sp|P17661|DESM_HUMAN Desmin OS=Homo sapiens GN=DES PE=1 SV=3	1	1	1	1	1	1	1	1	1	1	41945000	44849000	1	1	1	1	1	1	1	1	1	1	1	1
P17812;B4DR64;B7Z9C4;Q9NRF8	CTP synthase 1	CTPS1	>sp|P17812|PYRG1_HUMAN CTP synthase 1 OS=Homo sapiens GN=CTPS1 PE=1 SV=2;>tr|B4DR64|B4DR64_HUMAN CTP synthase OS=Homo sapiens GN=CTPS1 PE=2 SV=1	14145000	21414000	26394000	30410000	24433000	22318000	31589000	17651000	42967000	37142000	28478000	28292000	28858000	24412000	21579000	21586000	32695000	36464000	15632000	14869000	4524900	13511000	25031000	28478000
P17844;B4DLW8;J3KTA4;J3QSF1;J3QRQ7;J3QR02;J3KRX8;J3KRZ1;J3QKN9;J3QS79;J3QRN5	Probable ATP-dependent RNA helicase DDX5	DDX5	>sp|P17844|DDX5_HUMAN Probable ATP-dependent RNA helicase DDX5 OS=Homo sapiens GN=DDX5 PE=1 SV=1;>tr|B4DLW8|B4DLW8_HUMAN Probable ATP-dependent RNA helicase DDX5 OS=Homo sapiens GN=DDX5 PE=2 SV=1;>tr|J3KTA4|J3KTA4_HUMAN Probable ATP-dependent RNA helicase	841190000	928790000	697210000	570630000	963600000	922410000	922540000	1057500000	706400000	723870000	781470000	766760000	761990000	815530000	729380000	680850000	823050000	849630000	882000000	798600000	880980000	808050000	829550000	837860000
P17987;E7EQR6;E7ERF2;F5H282;F5GZ03;F5GZI8;F5H136;F5H676;F5GYL4;F5H726;F5H7Y1	T-complex protein 1 subunit alpha	TCP1	>sp|P17987|TCPA_HUMAN T-complex protein 1 subunit alpha OS=Homo sapiens GN=TCP1 PE=1 SV=1;>tr|E7EQR6|E7EQR6_HUMAN T-complex protein 1 subunit alpha OS=Homo sapiens GN=TCP1 PE=2 SV=1;>tr|E7ERF2|E7ERF2_HUMAN T-complex protein 1 subunit alpha OS=Homo sapiens	606950000	570210000	774830000	662500000	695040000	690090000	660050000	650090000	684610000	680030000	680270000	670860000	576570000	779830000	708670000	799590000	779930000	803430000	471270000	640410000	807960000	762580000	712710000	699570000
P18031;B4DSN5	Tyrosine-protein phosphatase non-receptor type 1;Tyrosine-protein phosphatase non-receptor type	PTPN1	>sp|P18031|PTN1_HUMAN Tyrosine-protein phosphatase non-receptor type 1 OS=Homo sapiens GN=PTPN1 PE=1 SV=1;>tr|B4DSN5|B4DSN5_HUMAN Tyrosine-protein phosphatase non-receptor type OS=Homo sapiens GN=PTPN1 PE=2 SV=1	5337500	7292200	1	8343000	5571100	5601600	9550500	6845300	8195900	8786500	9478100	8979800	5603600	15262000	9040100	12432000	29433000	16766000	6215200	6904600	9518500	8063900	10513000	9185700
P18077;C9K025;F8WBS5;F8WB72	60S ribosomal protein L35a	RPL35A	>sp|P18077|RL35A_HUMAN 60S ribosomal protein L35a OS=Homo sapiens GN=RPL35A PE=1 SV=2;>tr|C9K025|C9K025_HUMAN 60S ribosomal protein L35a (Fragment) OS=Homo sapiens GN=RPL35A PE=2 SV=1;>tr|F8WBS5|F8WBS5_HUMAN 60S ribosomal protein L35a OS=Homo sapiens GN=RP	300060000	377710000	147480000	162720000	320220000	293340000	232700000	221600000	256000000	247740000	221230000	234000000	233580000	235650000	320200000	208840000	168100000	250560000	203620000	238980000	341270000	343410000	241710000	266080000
P18085;C9JPM4;C9JAK5;U3KQF2;F8WDB3	ADP-ribosylation factor 4	ARF4	>sp|P18085|ARF4_HUMAN ADP-ribosylation factor 4 OS=Homo sapiens GN=ARF4 PE=1 SV=3;>tr|C9JPM4|C9JPM4_HUMAN ADP-ribosylation factor 4 (Fragment) OS=Homo sapiens GN=ARF4 PE=2 SV=1;>tr|C9JAK5|C9JAK5_HUMAN ADP-ribosylation factor 4 OS=Homo sapiens GN=ARF4 PE=2	15885000	6049200	24712000	17199000	13896000	17280000	52492000	44180000	78750000	72970000	38566000	54826000	100460000	79986000	91779000	71179000	78149000	72080000	99378000	95584000	30674000	85812000	107180000	104970000
P18124;A8MUD9;C9JIJ5;C9JZ88	60S ribosomal protein L7	RPL7	>sp|P18124|RL7_HUMAN 60S ribosomal protein L7 OS=Homo sapiens GN=RPL7 PE=1 SV=1;>tr|A8MUD9|A8MUD9_HUMAN 60S ribosomal protein L7 OS=Homo sapiens GN=RPL7 PE=3 SV=1	1087700000	1188900000	826820000	804420000	1037300000	1126600000	997930000	1040300000	872940000	723910000	868830000	913470000	956140000	1079400000	1089200000	1018100000	1019900000	1102000000	988610000	1069000000	1049500000	1087100000	1178200000	1011200000
P18615;B4DYX9;A2ABK4;E9PD43;B4DUN1	Negative elongation factor E	NELFE	>sp|P18615|NELFE_HUMAN Negative elongation factor E OS=Homo sapiens GN=NELFE PE=1 SV=3;>tr|B4DYX9|B4DYX9_HUMAN Negative elongation factor E OS=Homo sapiens GN=NELFE PE=2 SV=1;>tr|A2ABK4|A2ABK4_HUMAN Negative elongation factor E (Fragment) OS=Homo sapiens G	67370000	125600000	54798000	54771000	77434000	78657000	70203000	78698000	97145000	89101000	111210000	98358000	54906000	57307000	41801000	1	84975000	53484000	73729000	61171000	1	1	65400000	51280000
P18669;P15259;Q8N0Y7	Phosphoglycerate mutase 1;Phosphoglycerate mutase 2	PGAM1;PGAM2	>sp|P18669|PGAM1_HUMAN Phosphoglycerate mutase 1 OS=Homo sapiens GN=PGAM1 PE=1 SV=2;>sp|P15259|PGAM2_HUMAN Phosphoglycerate mutase 2 OS=Homo sapiens GN=PGAM2 PE=1 SV=3	63395000	73277000	391340000	400880000	114540000	103790000	98530000	101890000	158510000	142650000	129630000	128650000	67285000	78430000	111640000	56147000	151710000	159030000	42483000	47721000	44692000	49878000	83558000	90055000
P18859;P18859-2;A8MUH2	ATP synthase-coupling factor 6, mitochondrial	ATP5J	>sp|P18859|ATP5J_HUMAN ATP synthase-coupling factor 6, mitochondrial OS=Homo sapiens GN=ATP5J PE=1 SV=1;>sp|P18859-2|ATP5J_HUMAN Isoform 2 of ATP synthase-coupling factor 6, mitochondrial OS=Homo sapiens GN=ATP5J;>tr|A8MUH2|A8MUH2_HUMAN ATP synthase-coupli	18713000	21784000	42624000	1	13122000	18553000	21590000	43495000	19258000	15951000	17234000	18142000	39215000	35240000	37168000	24043000	38628000	27506000	13121000	28085000	12298000	18745000	24126000	24667000
P19013;CON__P19013;F5H8K9;F8VX05;F8VZR6	Keratin, type II cytoskeletal 4	KRT4	>sp|P19013|K2C4_HUMAN Keratin, type II cytoskeletal 4 OS=Homo sapiens GN=KRT4 PE=1 SV=4;>P19013 SWISS-PROT:P19013 Tax_Id=9606 Gene_Symbol=KRT4 keratin 4;>tr|F5H8K9|F5H8K9_HUMAN Keratin, type II cytoskeletal 4 OS=Homo sapiens GN=KRT4 PE=2 SV=1	1304300	1328100	834810	796370	1563900	1404000	691050	265550	535060	402510	990330	1000200	534960000	534060000	836440	1233700	362590	43349000	883260	261130	274300	183370	351700	405630
P19105;O14950;J3QRS3;P24844;J3KTJ1;P24844-2	Myosin regulatory light chain 12A;Myosin regulatory light chain 12B;Myosin regulatory light polypeptide 9	MYL12A;MYL12B;MYL9	>sp|P19105|ML12A_HUMAN Myosin regulatory light chain 12A OS=Homo sapiens GN=MYL12A PE=1 SV=2;>sp|O14950|ML12B_HUMAN Myosin regulatory light chain 12B OS=Homo sapiens GN=MYL12B PE=1 SV=2;>tr|J3QRS3|J3QRS3_HUMAN Myosin regulatory light chain 12A OS=Homo sapi	29869000	5485500	51608000	42583000	37891000	15867000	35985000	44273000	65909000	101960000	33634000	27829000	32438000	39533000	38842000	38295000	50233000	43795000	296860000	287870000	32604000	31020000	84668000	68494000
P19338;H7BY16;C9JYW2;C9JLB1;C9J1H7;C9JWL1	Nucleolin	NCL	>sp|P19338|NUCL_HUMAN Nucleolin OS=Homo sapiens GN=NCL PE=1 SV=3;>tr|H7BY16|H7BY16_HUMAN Nucleolin (Fragment) OS=Homo sapiens GN=NCL PE=2 SV=2	2120500000	2012200000	2072600000	1919900000	1897100000	1938100000	2070700000	2021100000	1705700000	1660200000	1536300000	1493400000	1833300000	1796100000	1801700000	1772800000	1721200000	1574900000	1592800000	1545900000	1799600000	1813500000	1657600000	1628700000
P19474;F5H012;P19474-2;H0YDP8	E3 ubiquitin-protein ligase TRIM21	TRIM21	>sp|P19474|RO52_HUMAN E3 ubiquitin-protein ligase TRIM21 OS=Homo sapiens GN=TRIM21 PE=1 SV=1;>tr|F5H012|F5H012_HUMAN E3 ubiquitin-protein ligase TRIM21 OS=Homo sapiens GN=TRIM21 PE=2 SV=1;>sp|P19474-2|RO52_HUMAN Isoform 2 of E3 ubiquitin-protein ligase TRI	1166700000	1326700000	348930000	507180000	990180000	1009400000	606920000	618540000	487810000	532770000	429200000	525590000	306850000	338510000	255990000	323690000	251070000	244940000	383810000	331440000	429630000	365570000	367340000	365820000
P19623;K7EL89;K7ESL0	Spermidine synthase	SRM	>sp|P19623|SPEE_HUMAN Spermidine synthase OS=Homo sapiens GN=SRM PE=1 SV=1;>tr|K7EL89|K7EL89_HUMAN Spermidine synthase (Fragment) OS=Homo sapiens GN=SRM PE=4 SV=1	4967900	1	11777000	8130600	4177200	1	3902300	1	5425000	5240300	3652400	4537500	4254600	4577600	4370900	6050200	7550600	6652900	3395200	3880600	1	1	4749500	1
P19784;H3BSA1;H3BV19;H3BNI9	Casein kinase II subunit alpha	CSNK2A2	>sp|P19784|CSK22_HUMAN Casein kinase II subunit alpha OS=Homo sapiens GN=CSNK2A2 PE=1 SV=1;>tr|H3BSA1|H3BSA1_HUMAN Casein kinase II subunit alpha (Fragment) OS=Homo sapiens GN=CSNK2A2 PE=2 SV=2;>tr|H3BV19|H3BV19_HUMAN Casein kinase II subunit alpha (Fra	23916000	14780000	19309000	16602000	18552000	20510000	9698900	13158000	8706000	11107000	8777000	11204000	14754000	10305000	9004900	7849200	9714300	1	19308000	13440000	1	8675200	22143000	15860000
P20042	Eukaryotic translation initiation factor 2 subunit 2	EIF2S2	>sp|P20042|IF2B_HUMAN Eukaryotic translation initiation factor 2 subunit 2 OS=Homo sapiens GN=EIF2S2 PE=1 SV=2	39750000	22498000	121440000	101030000	40478000	46237000	35228000	52114000	40315000	58645000	38753000	43473000	45208000	52234000	21203000	26183000	53342000	65611000	30145000	27981000	1	10562000	43141000	36298000
P20290-2;D6RDG3;P20290;H0Y9Y1	Transcription factor BTF3	BTF3	>sp|P20290-2|BTF3_HUMAN Isoform 2 of Transcription factor BTF3 OS=Homo sapiens GN=BTF3;>tr|D6RDG3|D6RDG3_HUMAN Transcription factor BTF3 (Fragment) OS=Homo sapiens GN=BTF3 PE=2 SV=2;>sp|P20290|BTF3_HUMAN Transcription factor BTF3 OS=Homo sapiens GN=BTF3 PE	12601000	25789000	9973100	27888000	9209100	20135000	9521200	7647700	25773000	17851000	16570000	12933000	6713800	9790600	4722400	4017300	28243000	16110000	3622400	5573100	42470000	1	9732000	7333800
P20674;H3BNX8;H3BRM5;H3BV69;H3BRI0	Cytochrome c oxidase subunit 5A, mitochondrial	COX5A	>sp|P20674|COX5A_HUMAN Cytochrome c oxidase subunit 5A, mitochondrial OS=Homo sapiens GN=COX5A PE=1 SV=2;>tr|H3BNX8|H3BNX8_HUMAN Cytochrome c oxidase subunit 5A, mitochondrial OS=Homo sapiens GN=COX5A PE=2 SV=1;>tr|H3BRM5|H3BRM5_HUMAN Cytochrome c oxidase	16598000	34677000	10252000	113070000	32403000	40962000	97853000	100760000	82314000	84026000	119720000	123190000	203720000	229550000	122570000	191090000	219120000	195810000	139940000	133780000	328480000	267830000	132870000	228390000
P20700;E9PBF6	Lamin-B1	LMNB1	>sp|P20700|LMNB1_HUMAN Lamin-B1 OS=Homo sapiens GN=LMNB1 PE=1 SV=2;>tr|E9PBF6|E9PBF6_HUMAN Lamin-B1 OS=Homo sapiens GN=LMNB1 PE=2 SV=1	63267000	29576000	15806000	1	81365000	52641000	31838000	32620000	22253000	18023000	37336000	39833000	10221000	13033000	16885000	21704000	12808000	16366000	43596000	40762000	10902000	1	12911000	14500000
P20930;CON__P20930	Filaggrin	FLG	>sp|P20930|FILA_HUMAN Filaggrin OS=Homo sapiens GN=FLG PE=1 SV=3;>P20930 SWISS-PROT:P20930 Tax_Id=9606 Gene_Symbol=FLG Filaggrin	1	1	1	1	2838000	2057700	1810500	6961200	1625500	2294000	1686900	1	2452300	2105700	1	1	1	1	1	1	1	1	1550000	1
P21359-2;P21359-6;P21359;H0Y465;P21359-4;J3KSB5;P21359-3;P21359-5;B4DXH1;J3QSG6;J3KRT8;J3QQN8;K7EP94;J3QLS2;K7EID4;B4DXP1;J3KSX8	Neurofibromin;Neurofibromin truncated	NF1	>sp|P21359-2|NF1_HUMAN Isoform 1 of Neurofibromin OS=Homo sapiens GN=NF1;>sp|P21359-6|NF1_HUMAN Isoform 6 of Neurofibromin OS=Homo sapiens GN=NF1;>sp|P21359|NF1_HUMAN Neurofibromin OS=Homo sapiens GN=NF1 PE=1 SV=2;>tr|H0Y465|H0Y465_HUMAN Neurofibromin trun	452140000	150070000	4203900	6831300	167160000	159480000	76211000	57989000	58997000	59479000	44249000	36695000	227200000	207570000	195320000	120370000	151820000	196530000	43457000	62486000	32892000	43609000	66059000	45302000
P21796;C9JI87	Voltage-dependent anion-selective channel protein 1	VDAC1	>sp|P21796|VDAC1_HUMAN Voltage-dependent anion-selective channel protein 1 OS=Homo sapiens GN=VDAC1 PE=1 SV=2;>tr|C9JI87|C9JI87_HUMAN Voltage-dependent anion-selective channel protein 1 (Fragment) OS=Homo sapiens GN=VDAC1 PE=2 SV=1	60226000	50493000	118140000	145730000	94992000	60984000	186960000	160200000	167650000	168650000	203800000	195600000	232100000	253320000	284740000	277540000	287000000	248870000	121520000	107790000	215920000	211960000	193370000	195160000
P22061;P22061-2;H7BY58;F8WDT3;F8WAV5;F8WAX2;B7Z972	Protein-L-isoaspartate(D-aspartate) O-methyltransferase;Protein-L-isoaspartate O-methyltransferase	PCMT1	>sp|P22061|PIMT_HUMAN Protein-L-isoaspartate(D-aspartate) O-methyltransferase OS=Homo sapiens GN=PCMT1 PE=1 SV=4;>sp|P22061-2|PIMT_HUMAN Isoform 2 of Protein-L-isoaspartate(D-aspartate) O-methyltransferase OS=Homo sapiens GN=PCMT1;>tr|H7BY58|H7BY58_HUMAN P	1	1	8093300	8338300	1	1	6178700	5065400	1	1	7846000	1	7414700	4447800	1	1	1	1	1	5996200	1	1	1	1
P22087;M0R0P1;M0R299;M0QXL5;M0R2Q4;M0R2U2;M0R1H0;M0R2B0;A6NHQ2;R4GMW7	rRNA 2-O-methyltransferase fibrillarin	FBL	>sp|P22087|FBRL_HUMAN rRNA 2-O-methyltransferase fibrillarin OS=Homo sapiens GN=FBL PE=1 SV=2;>tr|M0R0P1|M0R0P1_HUMAN rRNA 2-O-methyltransferase fibrillarin (Fragment) OS=Homo sapiens GN=FBL PE=2 SV=1;>tr|M0R299|M0R299_HUMAN rRNA 2-O-methyltransferase f	99214000	81057000	33644000	43300000	79260000	76198000	91134000	83009000	47415000	54264000	82689000	84388000	60276000	63291000	70997000	59851000	57544000	48227000	66527000	54779000	58718000	84680000	51025000	46052000
P22102;P22102-2;C9JBJ1;C9JTV6;F8WD69;B4DJ93;C9JZG2;C9JKQ7;H7C366	Trifunctional purine biosynthetic protein adenosine-3;Phosphoribosylamine--glycine ligase;Phosphoribosylformylglycinamidine cyclo-ligase;Phosphoribosylglycinamide formyltransferase	GART	>sp|P22102|PUR2_HUMAN Trifunctional purine biosynthetic protein adenosine-3 OS=Homo sapiens GN=GART PE=1 SV=1;>sp|P22102-2|PUR2_HUMAN Isoform Short of Trifunctional purine biosynthetic protein adenosine-3 OS=Homo sapiens GN=GART	15146000	14067000	103540000	108640000	38797000	25165000	40450000	35501000	44003000	68952000	32896000	29657000	36950000	46519000	14117000	70979000	65927000	45349000	15453000	21212000	10549000	12191000	25517000	29720000
P22234;P22234-2;E9PBS1;D6RF62	Multifunctional protein ADE2;Phosphoribosylaminoimidazole-succinocarboxamide synthase;Phosphoribosylaminoimidazole carboxylase	PAICS	>sp|P22234|PUR6_HUMAN Multifunctional protein ADE2 OS=Homo sapiens GN=PAICS PE=1 SV=3;>sp|P22234-2|PUR6_HUMAN Isoform 2 of Multifunctional protein ADE2 OS=Homo sapiens GN=PAICS;>tr|E9PBS1|E9PBS1_HUMAN Phosphoribosylaminoimidazole carboxylase (Fragment) OS=	50469000	63819000	208110000	217080000	96253000	96941000	84791000	74229000	99465000	87945000	85350000	85940000	64246000	38126000	56660000	74056000	115990000	91401000	25525000	35261000	35936000	40791000	45318000	53384000
P22314;Q5JRR9;Q5JRS0;Q5JRR6;Q5JRS1;Q5JRS3;Q5JRS2	Ubiquitin-like modifier-activating enzyme 1	UBA1	>sp|P22314|UBA1_HUMAN Ubiquitin-like modifier-activating enzyme 1 OS=Homo sapiens GN=UBA1 PE=1 SV=3	30164000	12727000	254730000	139810000	97615000	104580000	88786000	98224000	174850000	191510000	117120000	122700000	116360000	104070000	68215000	87046000	186260000	216740000	73875000	21303000	52190000	33595000	128350000	122150000
P22392-2;Q32Q12;P22392;J3KPD9;E7ERL0;E5RHP0;F6XY72;O60361;C9K028	Nucleoside diphosphate kinase B;Nucleoside diphosphate kinase	NME2;NME1-NME2;NME1	>sp|P22392-2|NDKB_HUMAN Isoform 3 of Nucleoside diphosphate kinase B OS=Homo sapiens GN=NME2;>tr|Q32Q12|Q32Q12_HUMAN Nucleoside diphosphate kinase OS=Homo sapiens GN=NME1-NME2 PE=2 SV=1;>sp|P22392|NDKB_HUMAN Nucleoside diphosphate kinase B OS=Homo sapiens	192250000	168790000	989270000	853950000	239050000	269600000	213070000	215380000	307730000	321380000	249910000	237910000	182960000	224980000	321030000	343180000	464410000	446250000	135560000	177840000	169490000	171470000	278660000	253250000
P22626;P22626-2	Heterogeneous nuclear ribonucleoproteins A2/B1	HNRNPA2B1	>sp|P22626|ROA2_HUMAN Heterogeneous nuclear ribonucleoproteins A2/B1 OS=Homo sapiens GN=HNRNPA2B1 PE=1 SV=2;>sp|P22626-2|ROA2_HUMAN Isoform A2 of Heterogeneous nuclear ribonucleoproteins A2/B1 OS=Homo sapiens GN=HNRNPA2B1	1832700000	1664800000	1082900000	1033000000	1539200000	1569800000	951360000	944020000	901560000	940050000	979750000	1063700000	634810000	669460000	777330000	784280000	619090000	759480000	1140100000	1234600000	880450000	845940000	722680000	764180000
P22695;H3BRG4;H3BSJ9;H3BP04;H3BUE4;H3BUI9	Cytochrome b-c1 complex subunit 2, mitochondrial	UQCRC2	>sp|P22695|QCR2_HUMAN Cytochrome b-c1 complex subunit 2, mitochondrial OS=Homo sapiens GN=UQCRC2 PE=1 SV=3;>tr|H3BRG4|H3BRG4_HUMAN Cytochrome b-c1 complex subunit 2, mitochondrial OS=Homo sapiens GN=UQCRC2 PE=2 SV=1;>tr|H3BSJ9|H3BSJ9_HUMAN Cytochrome b-c1	31970000	57005000	11303000	65885000	40856000	35298000	93016000	105720000	61116000	96955000	82157000	82141000	109420000	102150000	106390000	106730000	125490000	100910000	72181000	66830000	87886000	105150000	109640000	81168000
P23246;P23246-2;H0Y9K7;H0Y9U2	Splicing factor, proline- and glutamine-rich	SFPQ	>sp|P23246|SFPQ_HUMAN Splicing factor, proline- and glutamine-rich OS=Homo sapiens GN=SFPQ PE=1 SV=2;>sp|P23246-2|SFPQ_HUMAN Isoform Short of Splicing factor, proline- and glutamine-rich OS=Homo sapiens GN=SFPQ	1829500000	1640400000	1002400000	1193100000	1087800000	1128500000	617830000	546700000	728430000	646500000	517980000	588280000	513920000	467660000	496640000	533250000	807430000	811710000	1166600000	1027700000	312890000	346170000	336280000	320110000
P23284	Peptidyl-prolyl cis-trans isomerase B	PPIB	>sp|P23284|PPIB_HUMAN Peptidyl-prolyl cis-trans isomerase B OS=Homo sapiens GN=PPIB PE=1 SV=2	18272000	54824000	162680000	180550000	98518000	96412000	87138000	101280000	127680000	132960000	79233000	98488000	165270000	137890000	81178000	103190000	149380000	140730000	258990000	315500000	233240000	285460000	403440000	349260000
P23381-2;P23381;G3V3H8;G3V3Y5;G3V423;G3V5U1;G3V456;G3V277;G3V3P2;G3V227;G3V2Y7;H0YJP3;G3V3X0;G3V5W1;G3V3S7	Tryptophan--tRNA ligase, cytoplasmic;T1-TrpRS;T2-TrpRS	WARS	>sp|P23381-2|SYWC_HUMAN Isoform 2 of Tryptophan--tRNA ligase, cytoplasmic OS=Homo sapiens GN=WARS;>sp|P23381|SYWC_HUMAN Tryptophan--tRNA ligase, cytoplasmic OS=Homo sapiens GN=WARS PE=1 SV=2	168810000	143720000	39548000	40867000	136000000	158340000	92106000	75837000	91103000	93114000	94246000	101820000	51415000	51214000	36762000	43514000	41765000	43181000	45553000	42111000	31189000	44452000	53215000	33396000
P23396;P23396-2;E9PL09;E9PPU1;F2Z2S8;H0YCJ7;H0YF32;E9PQ96;E9PJH4;E9PK82;H0YEU2;E9PSF4;E9PQX2;H0YES8	40S ribosomal protein S3	RPS3	>sp|P23396|RS3_HUMAN 40S ribosomal protein S3 OS=Homo sapiens GN=RPS3 PE=1 SV=2;>sp|P23396-2|RS3_HUMAN Isoform 2 of 40S ribosomal protein S3 OS=Homo sapiens GN=RPS3;>tr|E9PL09|E9PL09_HUMAN 40S ribosomal protein S3 OS=Homo sapiens GN=RPS3 PE=2 SV=1;>tr|E9PP	1669700000	1685200000	1496300000	1586100000	1641600000	1706700000	2059000000	1953400000	1719100000	1676800000	1540700000	1592900000	1858700000	2126800000	2376800000	2383300000	1998000000	2192600000	1804700000	1856400000	2777900000	2503700000	2086100000	2034400000
P23458;K7EJR6;E9PM19;P29597;F5H5U8;O60674	Tyrosine-protein kinase JAK1	JAK1	>sp|P23458|JAK1_HUMAN Tyrosine-protein kinase JAK1 OS=Homo sapiens GN=JAK1 PE=1 SV=2	489860000	472100000	916440	1	487330000	428020000	389630000	355430000	350010000	357590000	289580000	292120000	165230000	181000000	138500000	115650000	149310000	112850000	211910000	247940000	214140000	247280000	265600000	225030000
P23526;P23526-2	Adenosylhomocysteinase	AHCY	>sp|P23526|SAHH_HUMAN Adenosylhomocysteinase OS=Homo sapiens GN=AHCY PE=1 SV=4;>sp|P23526-2|SAHH_HUMAN Isoform 2 of Adenosylhomocysteinase OS=Homo sapiens GN=AHCY	57032000	58230000	247710000	237900000	94300000	82868000	70456000	82394000	121250000	121050000	100600000	115860000	73447000	68586000	66060000	89649000	98387000	100250000	56516000	47218000	49447000	37185000	54192000	54249000
P23528;G3V1A4;E9PP50;E9PK25;E9PQB7;E9PLJ3;E9PS23	Cofilin-1	CFL1	>sp|P23528|COF1_HUMAN Cofilin-1 OS=Homo sapiens GN=CFL1 PE=1 SV=3;>tr|G3V1A4|G3V1A4_HUMAN Cofilin 1 (Non-muscle), isoform CRA_a OS=Homo sapiens GN=CFL1 PE=4 SV=1;>tr|E9PP50|E9PP50_HUMAN Cofilin-1 (Fragment) OS=Homo sapiens GN=CFL1 PE=2 SV=2;>tr|E9PK25|E9PK	266660000	363670000	677200000	634940000	345440000	368490000	189120000	182430000	280330000	302730000	244710000	244770000	155670000	185210000	282860000	370680000	245500000	214340000	139480000	160470000	185300000	171850000	182610000	191530000
P23588;E7EX17;B4DS13;F8VX11;F8VSC7;F8W0K0;F8VYE9;F8VRU1;REV__F8VX11;REV__B4DS13;REV__P23588;REV__E7EX17	Eukaryotic translation initiation factor 4B	EIF4B	>sp|P23588|IF4B_HUMAN Eukaryotic translation initiation factor 4B OS=Homo sapiens GN=EIF4B PE=1 SV=2;>tr|E7EX17|E7EX17_HUMAN Eukaryotic translation initiation factor 4B OS=Homo sapiens GN=EIF4B PE=2 SV=1;>tr|B4DS13|B4DS13_HUMAN Eukaryotic translation initi	24846000000	19594000000	1109200000	893360000	16715000000	16725000000	8441200000	7041600000	8579600000	8003500000	5926600000	6062100000	3912500000	3088700000	1852100000	1913900000	2388200000	2156200000	4661000000	4270500000	2539800000	2621600000	3403100000	3433000000
P24534;F8WF65;F2Z2G2;C9JZW3	Elongation factor 1-beta	EEF1B2	>sp|P24534|EF1B_HUMAN Elongation factor 1-beta OS=Homo sapiens GN=EEF1B2 PE=1 SV=3	488370000	470480000	282020000	383080000	547210000	565630000	336880000	366830000	352660000	406210000	259190000	222550000	232410000	206570000	194520000	266130000	162770000	195640000	207030000	233040000	226460000	195930000	198740000	241460000
P24752;H0YEL7;E9PRQ6;G3XAB4	Acetyl-CoA acetyltransferase, mitochondrial	ACAT1	>sp|P24752|THIL_HUMAN Acetyl-CoA acetyltransferase, mitochondrial OS=Homo sapiens GN=ACAT1 PE=1 SV=1	7327200	5951200	25876000	20715000	7831600	8514000	7912000	7029900	18776000	9703600	6709000	6875700	7217400	5718900	5835000	7263000	1	9372400	7049300	3460100	6100800	1	6579400	5551200
P25205;B4DWW4;J3KQ69;Q7Z6P5	DNA replication licensing factor MCM3	MCM3	>sp|P25205|MCM3_HUMAN DNA replication licensing factor MCM3 OS=Homo sapiens GN=MCM3 PE=1 SV=3;>tr|B4DWW4|B4DWW4_HUMAN DNA replication licensing factor MCM3 OS=Homo sapiens GN=MCM3 PE=2 SV=1;>tr|J3KQ69|J3KQ69_HUMAN DNA replication licensing factor MCM3 OS=H	134680000	107270000	96122000	94689000	153390000	154680000	79202000	131930000	111790000	119800000	78573000	67299000	78168000	53706000	33262000	35928000	73488000	91401000	44461000	64648000	49520000	41466000	75559000	77064000
P25398	40S ribosomal protein S12	RPS12	>sp|P25398|RS12_HUMAN 40S ribosomal protein S12 OS=Homo sapiens GN=RPS12 PE=1 SV=3	359260000	435130000	629900000	655060000	435350000	400110000	559840000	379700000	336890000	465220000	462920000	489410000	581670000	620360000	444350000	450290000	505120000	491300000	360280000	466590000	378530000	475560000	435120000	457800000
P25440-2;Q658Y7;P25440;H0Y6K2;U3KQA6;O60885-2;O60885-3;O60885	Bromodomain-containing protein 2	BRD2;DKFZp313H139	>sp|P25440-2|BRD2_HUMAN Isoform 2 of Bromodomain-containing protein 2 OS=Homo sapiens GN=BRD2;>tr|Q658Y7|Q658Y7_HUMAN Bromodomain containing 2, isoform CRA_a OS=Homo sapiens GN=DKFZp313H139 PE=1 SV=1;>sp|P25440|BRD2_HUMAN Bromodomain-containing protein 2 O	16105000	14608000	9507100	15228000	6150200	7282500	7233200	8999400	16563000	29103000	7625400	7756700	5539700	8629200	3500200	3075800	5417100	3945500	71759000	55328000	5732900	5636000	8559300	4233100
P25705;P25705-2;P25705-3;K7EK77;K7ERX7;K7ENJ4;K7EJP1;K7EQH4;K7ESA0	ATP synthase subunit alpha, mitochondrial	ATP5A1	>sp|P25705|ATPA_HUMAN ATP synthase subunit alpha, mitochondrial OS=Homo sapiens GN=ATP5A1 PE=1 SV=1;>sp|P25705-2|ATPA_HUMAN Isoform 2 of ATP synthase subunit alpha, mitochondrial OS=Homo sapiens GN=ATP5A1;>sp|P25705-3|ATPA_HUMAN Isoform 3 of ATP synthase s	261420000	278400000	601940000	617470000	335530000	306480000	496420000	448320000	483100000	444500000	507760000	483860000	661530000	689210000	734320000	828240000	677780000	769380000	412210000	410040000	661640000	676260000	601860000	592150000
P25788-2;P25788	Proteasome subunit alpha type-3	PSMA3	>sp|P25788-2|PSA3_HUMAN Isoform 2 of Proteasome subunit alpha type-3 OS=Homo sapiens GN=PSMA3;>sp|P25788|PSA3_HUMAN Proteasome subunit alpha type-3 OS=Homo sapiens GN=PSMA3 PE=1 SV=2	4122500	5289100	6967300	6204000	1	1	1	1	1	1	5678600	3872600	1	1	3782100	3942400	2880400	2449500	1	1	1	1	1	2205500
P25789;H0YN18;P25789-2;H0YMZ1;H0YL69;H0YMI6;H0YMA1;H0YKT8;H0YKS0;H0YLC2;H0YLS6;H0YMV3	Proteasome subunit alpha type-4;Proteasome subunit alpha type	PSMA4	>sp|P25789|PSA4_HUMAN Proteasome subunit alpha type-4 OS=Homo sapiens GN=PSMA4 PE=1 SV=1;>tr|H0YN18|H0YN18_HUMAN Proteasome subunit alpha type-4 OS=Homo sapiens GN=PSMA4 PE=2 SV=1;>sp|P25789-2|PSA4_HUMAN Isoform 2 of Proteasome subunit alpha type-4 OS=Homo	171100000	229430000	27687000	16148000	247280000	225550000	114790000	170710000	126650000	118570000	157960000	179450000	55728000	70916000	19227000	38926000	84265000	87352000	133810000	56837000	67189000	66011000	73360000	89886000
P26196	Probable ATP-dependent RNA helicase DDX6	DDX6	>sp|P26196|DDX6_HUMAN Probable ATP-dependent RNA helicase DDX6 OS=Homo sapiens GN=DDX6 PE=1 SV=2	12408000	44519000	16736000	23971000	11567000	15982000	9977900	8696300	16787000	23349000	31987000	14693000	12834000	14839000	15698000	15721000	21597000	29666000	11563000	12960000	13391000	5731100	15607000	28223000
P26358-3;P26358;F5GX68;P26358-2;K7ENW7	DNA (cytosine-5)-methyltransferase 1;Cytosine-specific methyltransferase	DNMT1	>sp|P26358-3|DNMT1_HUMAN Isoform 3 of DNA (cytosine-5)-methyltransferase 1 OS=Homo sapiens GN=DNMT1;>sp|P26358|DNMT1_HUMAN DNA (cytosine-5)-methyltransferase 1 OS=Homo sapiens GN=DNMT1 PE=1 SV=2;>tr|F5GX68|F5GX68_HUMAN Cytosine-specific methyltransferase O	30287000	59703000	1	46385000	62714000	41107000	28849000	37560000	24094000	36746000	39238000	1	26893000	20529000	1	1	1	1	38069000	23893000	1	1	1	1
P26368-2;P26368;K7ENG2	Splicing factor U2AF 65 kDa subunit	U2AF2	>sp|P26368-2|U2AF2_HUMAN Isoform 2 of Splicing factor U2AF 65 kDa subunit OS=Homo sapiens GN=U2AF2;>sp|P26368|U2AF2_HUMAN Splicing factor U2AF 65 kDa subunit OS=Homo sapiens GN=U2AF2 PE=1 SV=4;>tr|K7ENG2|K7ENG2_HUMAN Splicing factor U2AF 65 kDa subunit OS=	1	1	1	1	16621000	1	10674000	15950000	12750000	17078000	14164000	31419000	15110000	15047000	13455000	36700000	38229000	18752000	22882000	13487000	33002000	29430000	15200000	14984000
P26373;P26373-2;J3QSB4;J3KS98;H3BTH3;H3BUK8	60S ribosomal protein L13	RPL13	>sp|P26373|RL13_HUMAN 60S ribosomal protein L13 OS=Homo sapiens GN=RPL13 PE=1 SV=4;>sp|P26373-2|RL13_HUMAN Isoform 2 of 60S ribosomal protein L13 OS=Homo sapiens GN=RPL13;>tr|J3QSB4|J3QSB4_HUMAN 60S ribosomal protein L13 (Fragment) OS=Homo sapiens GN=RPL13	1075300000	1080200000	682040000	579420000	1032100000	991600000	1264300000	1208200000	923890000	869050000	920070000	804670000	1006500000	1055700000	1137000000	1329100000	986680000	1022900000	716350000	853080000	1065900000	1037700000	992130000	827050000
P26583;D6R9A6	High mobility group protein B2	HMGB2	>sp|P26583|HMGB2_HUMAN High mobility group protein B2 OS=Homo sapiens GN=HMGB2 PE=1 SV=2;>tr|D6R9A6|D6R9A6_HUMAN High mobility group protein B2 (Fragment) OS=Homo sapiens GN=HMGB2 PE=2 SV=1	10262000	17555000	42531000	40521000	14868000	14204000	14093000	13459000	39384000	14556000	24873000	25422000	20107000	10839000	12181000	3323600	34304000	32412000	15635000	8164000	3653100	1	11125000	10676000
P26599;P26599-2;P26599-3;A6NLN1;K7EKJ7;K7EK45;K7ELW5;K7ES59;O95758-1;O95758-6;O95758-2;O95758;O95758-5;O95758-4;O95758-7	Polypyrimidine tract-binding protein 1	PTBP1	>sp|P26599|PTBP1_HUMAN Polypyrimidine tract-binding protein 1 OS=Homo sapiens GN=PTBP1 PE=1 SV=1;>sp|P26599-2|PTBP1_HUMAN Isoform 2 of Polypyrimidine tract-binding protein 1 OS=Homo sapiens GN=PTBP1;>sp|P26599-3|PTBP1_HUMAN Isoform 3 of Polypyrimidine trac	590820000	597650000	471800000	353730000	542420000	572650000	358010000	364270000	457420000	393870000	338360000	339620000	262900000	279750000	197380000	253340000	282630000	250390000	279720000	288720000	242060000	227800000	252610000	296400000
P26639;P26639-2;E7ERI3;G3XAN9;D6RCA5;D6R9F8;D6RDJ6	Threonine--tRNA ligase, cytoplasmic	TARS	>sp|P26639|SYTC_HUMAN Threonine--tRNA ligase, cytoplasmic OS=Homo sapiens GN=TARS PE=1 SV=3;>sp|P26639-2|SYTC_HUMAN Isoform 2 of Threonine--tRNA ligase, cytoplasmic OS=Homo sapiens GN=TARS;>tr|E7ERI3|E7ERI3_HUMAN Threonine--tRNA ligase, cytoplasmic OS=Homo	12410000	12051000	16135000	46824000	27928000	25543000	22688000	9485300	28204000	28761000	23032000	26522000	10987000	25333000	5820100	4804000	32044000	31574000	8851400	12591000	1	1	3433100	2805500
P26640;B4DZ61;A2ABF4	Valine--tRNA ligase	VARS	>sp|P26640|SYVC_HUMAN Valine--tRNA ligase OS=Homo sapiens GN=VARS PE=1 SV=4	35485000	63169000	22509000	26655000	42723000	68118000	22764000	44961000	44236000	50644000	30738000	42733000	18873000	15586000	10546000	8521200	16817000	18080000	15377000	15715000	13624000	11453000	11584000	18132000
P26641;B4DTG2	Elongation factor 1-gamma	EEF1G	>sp|P26641|EF1G_HUMAN Elongation factor 1-gamma OS=Homo sapiens GN=EEF1G PE=1 SV=3;>tr|B4DTG2|B4DTG2_HUMAN Elongation factor 1-gamma OS=Homo sapiens GN=EEF1G PE=2 SV=1	1195900000	1183000000	2136600000	1818300000	1421700000	1296700000	900230000	860310000	923260000	841350000	770530000	666240000	478770000	489750000	477720000	540940000	630040000	584850000	444480000	536090000	387800000	458780000	593090000	593660000
P27348;E9PG15	14-3-3 protein theta	YWHAQ	>sp|P27348|1433T_HUMAN 14-3-3 protein theta OS=Homo sapiens GN=YWHAQ PE=1 SV=1;>tr|E9PG15|E9PG15_HUMAN 14-3-3 protein theta (Fragment) OS=Homo sapiens GN=YWHAQ PE=2 SV=1	32472000	26905000	43788000	40484000	56002000	50495000	87945000	82086000	88820000	80740000	91114000	114520000	80147000	81507000	54259000	83507000	113130000	131570000	58333000	76061000	98096000	77262000	89316000	96583000
P27448-8;P27448-6;P27448-3;P27448-4;P27448-2;P27448;P27448-7;J3KNR0;K7EK17;K7EKG8;F5H6N2;H0YKJ3;F5H4F6;H0YNV4;H0YKP9;A2SY06;H0YIY6;Q7KZI7-10;Q96L34-2;Q7KZI7-13;Q7KZI7-7;E7ETY4;Q7KZI7-2;Q7KZI7-15;Q7KZI7-5;Q7KZI7-16;Q7KZI7-4;Q7KZI7-9;Q7KZI7-12;Q7KZI7-14;Q7KZI7-3;Q96L34;Q7KZI7-6;Q7KZI7-11;E9PC69;Q7KZI7-8;Q7KZI7;Q9P0L2	MAP/microtubule affinity-regulating kinase 3;Serine/threonine-protein kinase MARK2;MAP/microtubule affinity-regulating kinase 4;Serine/threonine-protein kinase MARK1	MARK3;MARK4;MARK2;MARK1	>sp|P27448-8|MARK3_HUMAN Isoform 7 of MAP/microtubule affinity-regulating kinase 3 OS=Homo sapiens GN=MARK3;>sp|P27448-6|MARK3_HUMAN Isoform 5 of MAP/microtubule affinity-regulating kinase 3 OS=Homo sapiens GN=MARK3;>sp|P27448-3|MARK3_HUMAN Isoform 3 of MA	322430000	1	1	1	1	1	193700000	172950000	128910000	177610000	99371000	164750000	67342000	95237000	3298300	1	1	1	107210000	489710000	1	55527000	203620000	1
P27694;I3L4R8;I3L524;I3L2M5	Replication protein A 70 kDa DNA-binding subunit;Replication protein A 70 kDa DNA-binding subunit, N-terminally processed	RPA1	>sp|P27694|RFA1_HUMAN Replication protein A 70 kDa DNA-binding subunit OS=Homo sapiens GN=RPA1 PE=1 SV=2	5148900	21618000	35903000	35140000	44089000	24225000	56267000	55905000	208360000	153860000	80269000	75236000	27104000	27830000	18288000	8926300	31796000	31666000	276120000	258570000	27005000	32253000	40675000	33497000
P27797;K7EJB9	Calreticulin	CALR	>sp|P27797|CALR_HUMAN Calreticulin OS=Homo sapiens GN=CALR PE=1 SV=1;>tr|K7EJB9|K7EJB9_HUMAN Calreticulin (Fragment) OS=Homo sapiens GN=CALR PE=2 SV=1	43927000	38200000	248900000	208740000	76026000	57842000	42602000	59203000	101660000	84723000	78837000	82068000	41500000	38157000	37246000	34959000	84852000	104780000	21944000	21774000	12546000	9181500	38629000	48699000
P27816-2;P27816-6;P27816;E7EVA0;P27816-5;B9ZVR1;P27816-4;E9PGM5;B4DSQ1;H0Y2V1;H7C4C5;B5MEG9;F8W9U4;H7C456	Microtubule-associated protein 4;Microtubule-associated protein	MAP4	>sp|P27816-2|MAP4_HUMAN Isoform 2 of Microtubule-associated protein 4 OS=Homo sapiens GN=MAP4;>sp|P27816-6|MAP4_HUMAN Isoform 6 of Microtubule-associated protein 4 OS=Homo sapiens GN=MAP4;>sp|P27816|MAP4_HUMAN Microtubule-associated protein 4 OS=Homo sapie	19899000	22904000	65164000	77826000	28712000	22326000	24789000	9499300	22853000	20232000	17682000	20777000	12016000	15639000	7712800	25056000	18972000	6529900	13555000	10820000	7858600	8470500	6791400	7606100
P27824;B4DGP8;B4E2T8;H0Y9Q7;D6RFL1;D6RGY2;H0Y9H1;D6RAU8;D6RB85;D6RDP7;D6RAQ8;D6RHJ3;D6RD16	Calnexin	CANX	>sp|P27824|CALX_HUMAN Calnexin OS=Homo sapiens GN=CANX PE=1 SV=2;>tr|B4DGP8|B4DGP8_HUMAN Calnexin OS=Homo sapiens GN=CANX PE=2 SV=1;>tr|B4E2T8|B4E2T8_HUMAN Calnexin OS=Homo sapiens GN=CANX PE=2 SV=1;>tr|H0Y9Q7|H0Y9Q7_HUMAN Calnexin (Fragment) OS=Homo sapie	129340000	141420000	253080000	170920000	163050000	165310000	175380000	167800000	171000000	187950000	172360000	160160000	177590000	199120000	190360000	195020000	216420000	199450000	114360000	139080000	154530000	170800000	145630000	139310000
P27986-5;P27986-3;P27986-2;P27986;P27986-4;Q92569;F6TDL0;E5RJY0;H0YBC2;Q92569-3;E7EMU8;Q92569-2;O00459	Phosphatidylinositol 3-kinase regulatory subunit alpha;Phosphatidylinositol 3-kinase regulatory subunit gamma	PIK3R1;PIK3R3	>sp|P27986-5|P85A_HUMAN Isoform 5 of Phosphatidylinositol 3-kinase regulatory subunit alpha OS=Homo sapiens GN=PIK3R1;>sp|P27986-3|P85A_HUMAN Isoform 3 of Phosphatidylinositol 3-kinase regulatory subunit alpha OS=Homo sapiens GN=PIK3R1;>sp|P27986-2|P85A_HU	6771300	6044000	1	1	6717100	5974300	13680000	14396000	6561500	7681000	5866300	8171100	6728000	10178000	1	11646000	13142000	6678000	10245000	15276000	1	7873100	1	1
P28066-2;P28066	Proteasome subunit alpha type-5	PSMA5	>sp|P28066-2|PSA5_HUMAN Isoform 2 of Proteasome subunit alpha type-5 OS=Homo sapiens GN=PSMA5;>sp|P28066|PSA5_HUMAN Proteasome subunit alpha type-5 OS=Homo sapiens GN=PSMA5 PE=1 SV=3	7793700	1	13395000	14600000	1	3619600	11860000	5431800	1	5269900	5892500	6449400	4847900	5927600	1	1	5821300	5060600	1	3972400	19999000	1	5129800	4640800
P28288;E7EUE1;F5GYC1;P28288-2;P28288-3	ATP-binding cassette sub-family D member 3	ABCD3	>sp|P28288|ABCD3_HUMAN ATP-binding cassette sub-family D member 3 OS=Homo sapiens GN=ABCD3 PE=1 SV=1;>tr|E7EUE1|E7EUE1_HUMAN ATP-binding cassette sub-family D member 3 OS=Homo sapiens GN=ABCD3 PE=2 SV=1;>tr|F5GYC1|F5GYC1_HUMAN ATP-binding cassette sub-fami	9677500	15563000	7412700	7080700	25734000	26968000	1341700000	1506400000	762910000	799410000	919290000	916800000	2217600000	2413700000	1722900000	2023900000	1551300000	1695700000	2116700000	2160400000	2165400000	2281400000	2433600000	2366300000
P29144;Q5VZU9	Tripeptidyl-peptidase 2	TPP2	>sp|P29144|TPP2_HUMAN Tripeptidyl-peptidase 2 OS=Homo sapiens GN=TPP2 PE=1 SV=4;>tr|Q5VZU9|Q5VZU9_HUMAN Tripeptidyl-peptidase 2 OS=Homo sapiens GN=TPP2 PE=2 SV=1	2997500	3410000	1	1	3359400	3853300	2423700	2632400	2769300	3343100	3362400	3128700	2253300	1	2240300	3353100	2400800	3671400	3040200	2163800	5964800	1	2027500	2376600
P30040;P30040-2;F8VY02	Endoplasmic reticulum resident protein 29	ERP29	>sp|P30040|ERP29_HUMAN Endoplasmic reticulum resident protein 29 OS=Homo sapiens GN=ERP29 PE=1 SV=4;>sp|P30040-2|ERP29_HUMAN Isoform 2 of Endoplasmic reticulum resident protein 29 OS=Homo sapiens GN=ERP29;>tr|F8VY02|F8VY02_HUMAN Endoplasmic reticulum resid	1	1	1	1	10122000	1	6087600	5394000	8314500	6799400	5636200	1	1	4237200	6081400	1	16303000	1	1	1	1	1	5812400	5901100
P30041	Peroxiredoxin-6	PRDX6	>sp|P30041|PRDX6_HUMAN Peroxiredoxin-6 OS=Homo sapiens GN=PRDX6 PE=1 SV=3	463970000	533860000	383590000	417010000	602430000	577840000	411700000	449400000	483690000	448780000	432970000	408260000	318260000	336060000	258820000	287500000	399700000	350120000	288040000	338530000	291130000	274940000	368500000	406760000
P30048-2;P30048	Thioredoxin-dependent peroxide reductase, mitochondrial	PRDX3	>sp|P30048-2|PRDX3_HUMAN Isoform 2 of Thioredoxin-dependent peroxide reductase, mitochondrial OS=Homo sapiens GN=PRDX3;>sp|P30048|PRDX3_HUMAN Thioredoxin-dependent peroxide reductase, mitochondrial OS=Homo sapiens GN=PRDX3 PE=1 SV=3	15299000	20480000	19442000	76817000	27722000	36881000	26401000	24700000	30162000	67268000	47359000	42067000	39637000	32453000	41990000	43829000	59837000	57888000	12697000	15743000	22568000	22341000	43605000	37187000
P30049	ATP synthase subunit delta, mitochondrial	ATP5D	>sp|P30049|ATPD_HUMAN ATP synthase subunit delta, mitochondrial OS=Homo sapiens GN=ATP5D PE=1 SV=2	10801000	12145000	9501700	13510000	14992000	12574000	27250000	34732000	28481000	25544000	31966000	32204000	29963000	25824000	46383000	40350000	30301000	32187000	35694000	31702000	48161000	37962000	37783000	37488000
P30050;P30050-2	60S ribosomal protein L12	RPL12	>sp|P30050|RL12_HUMAN 60S ribosomal protein L12 OS=Homo sapiens GN=RPL12 PE=1 SV=1;>sp|P30050-2|RL12_HUMAN Isoform 2 of 60S ribosomal protein L12 OS=Homo sapiens GN=RPL12	340170000	313800000	278500000	261320000	287830000	291160000	401240000	335060000	263150000	289560000	317220000	266440000	421760000	366210000	440980000	376060000	379390000	404490000	226050000	230380000	349540000	419580000	325100000	352530000
P30086	Phosphatidylethanolamine-binding protein 1;Hippocampal cholinergic neurostimulating peptide	PEBP1	>sp|P30086|PEBP1_HUMAN Phosphatidylethanolamine-binding protein 1 OS=Homo sapiens GN=PEBP1 PE=1 SV=3	32860000	45611000	134770000	231170000	43039000	66454000	27741000	35868000	92029000	110640000	75400000	70255000	29392000	16316000	17312000	12685000	65984000	75429000	30350000	19642000	11579000	10564000	25588000	34289000
P30153;F5H3X9;B3KQV6;C9J9C1;E9PH38	Serine/threonine-protein phosphatase 2A 65 kDa regulatory subunit A alpha isoform	PPP2R1A	>sp|P30153|2AAA_HUMAN Serine/threonine-protein phosphatase 2A 65 kDa regulatory subunit A alpha isoform OS=Homo sapiens GN=PPP2R1A PE=1 SV=4;>tr|F5H3X9|F5H3X9_HUMAN Serine/threonine-protein phosphatase 2A 65 kDa regulatory subunit A alpha isoform OS=Homo s	79341000	90293000	96802000	60605000	106390000	104880000	125760000	152820000	107320000	131700000	127680000	113700000	128050000	130890000	144200000	115250000	131470000	122550000	97386000	83551000	96850000	104810000	92554000	118470000
P30154-4;P30154;P30154-2;P30154-5;P30154-3;E9PPI5;E9PHZ6;H0YDG7;J3KR29;E9PNM7	Serine/threonine-protein phosphatase 2A 65 kDa regulatory subunit A beta isoform	PPP2R1B	>sp|P30154-4|2AAB_HUMAN Isoform 4 of Serine/threonine-protein phosphatase 2A 65 kDa regulatory subunit A beta isoform OS=Homo sapiens GN=PPP2R1B;>sp|P30154|2AAB_HUMAN Serine/threonine-protein phosphatase 2A 65 kDa regulatory subunit A beta isoform OS=Homo	1	1	1	1	1	1	11763000	12428000	6204500	1	14114000	1	14019000	21579000	1	14143000	16041000	1	16012000	8364900	1	1	1	8863600
P31153;B4DN45;Q00266	S-adenosylmethionine synthase isoform type-2;S-adenosylmethionine synthase	MAT2A	>sp|P31153|METK2_HUMAN S-adenosylmethionine synthase isoform type-2 OS=Homo sapiens GN=MAT2A PE=1 SV=1;>tr|B4DN45|B4DN45_HUMAN S-adenosylmethionine synthase OS=Homo sapiens GN=MAT2A PE=2 SV=1	1276100000	1236800000	220940000	287090000	1305900000	1405800000	797540000	822030000	935090000	938460000	780970000	828650000	575780000	495790000	377760000	413440000	437790000	453760000	505910000	436000000	496330000	459110000	470630000	457700000
P31689;P31689-2;B7Z5C0	DnaJ homolog subfamily A member 1	DNAJA1	>sp|P31689|DNJA1_HUMAN DnaJ homolog subfamily A member 1 OS=Homo sapiens GN=DNAJA1 PE=1 SV=2;>sp|P31689-2|DNJA1_HUMAN Isoform 2 of DnaJ homolog subfamily A member 1 OS=Homo sapiens GN=DNAJA1;>tr|B7Z5C0|B7Z5C0_HUMAN DnaJ homolog subfamily A member 1 OS=Homo	196020000	152960000	21218000	159170000	163330000	165040000	308270000	271570000	248170000	260460000	221970000	242200000	362720000	381900000	421510000	502540000	444960000	407780000	308480000	326310000	468090000	451350000	337360000	369150000
P31930	Cytochrome b-c1 complex subunit 1, mitochondrial	UQCRC1	>sp|P31930|QCR1_HUMAN Cytochrome b-c1 complex subunit 1, mitochondrial OS=Homo sapiens GN=UQCRC1 PE=1 SV=3	6606200	9524700	28842000	23179000	12978000	11778000	13779000	13873000	20456000	22126000	17983000	11582000	21431000	13298000	5999300	41551000	16160000	27256000	10748000	5528100	8088900	8252800	5432900	5559500
P31939-2;P31939;F5GWY2;H7C1S2;H7C084;F8WEF0;C9JLK0;H7BZU3	Bifunctional purine biosynthesis protein PURH;Phosphoribosylaminoimidazolecarboxamide formyltransferase;IMP cyclohydrolase	ATIC	>sp|P31939-2|PUR9_HUMAN Isoform 2 of Bifunctional purine biosynthesis protein PURH OS=Homo sapiens GN=ATIC;>sp|P31939|PUR9_HUMAN Bifunctional purine biosynthesis protein PURH OS=Homo sapiens GN=ATIC PE=1 SV=3;>tr|F5GWY2|F5GWY2_HUMAN Phosphoribosylaminoimid	4025900	9191800	47274000	30323000	7765100	14830000	13577000	35963000	50947000	47293000	15245000	21917000	13833000	12560000	26728000	24886000	52479000	66454000	7680100	10339000	13205000	13054000	23103000	30032000
P31942-3;P31942-2;P31942;P31942-4;B4DHY1;P31942-6;P31942-5	Heterogeneous nuclear ribonucleoprotein H3	HNRNPH3	>sp|P31942-3|HNRH3_HUMAN Isoform 3 of Heterogeneous nuclear ribonucleoprotein H3 OS=Homo sapiens GN=HNRNPH3;>sp|P31942-2|HNRH3_HUMAN Isoform 2 of Heterogeneous nuclear ribonucleoprotein H3 OS=Homo sapiens GN=HNRNPH3;>sp|P31942|HNRH3_HUMAN Heterogeneous nuc	864970	1	1	12344000	1	22437000	6798400	15469000	1	1	10945000	10498000	6934100	8806000	9975900	7637600	6484800	8120500	11217000	11105000	9108100	1	23489000	4074400
P31943;G8JLB6;E9PCY7;D6RIU0;D6RBM0;E7EQJ0;D6RAM1;D6R9T0;D6RFM3;D6RIT2;D6RDU3;D6RJ04;D6RIH9;E7EN40;H0YB39;D6RDL0;E5RGV0;H0YBG7;H0YBD7;D6RF17;F5GZT4;D6R9D3;E5RGH4;H0YAQ2;E5RJ94;H0YBK1	Heterogeneous nuclear ribonucleoprotein H;Heterogeneous nuclear ribonucleoprotein H, N-terminally processed	HNRNPH1	>sp|P31943|HNRH1_HUMAN Heterogeneous nuclear ribonucleoprotein H OS=Homo sapiens GN=HNRNPH1 PE=1 SV=4;>tr|G8JLB6|G8JLB6_HUMAN Heterogeneous nuclear ribonucleoprotein H OS=Homo sapiens GN=HNRNPH1 PE=2 SV=1;>tr|E9PCY7|E9PCY7_HUMAN Heterogeneous nuclear ribon	929240000	925340000	657520000	559460000	960590000	988610000	550520000	538590000	576270000	546090000	520210000	593520000	421470000	488200000	470420000	486830000	459860000	489330000	414620000	496260000	666070000	757870000	541770000	564440000
P31944	Caspase-14;Caspase-14 subunit p19;Caspase-14 subunit p10	CASP14	>sp|P31944|CASPE_HUMAN Caspase-14 OS=Homo sapiens GN=CASP14 PE=1 SV=2	1619900	1	9029600	5835000	2391300	2736500	2347500	2889700	3635400	4043100	25573000	29744000	1	1	1	1	1	1	3071300	3231100	1	1	1	1
P31946-2	14-3-3 protein beta/alpha;14-3-3 protein beta/alpha, N-terminally processed	YWHAB	>sp|P31946-2|1433B_HUMAN Isoform Short of 14-3-3 protein beta/alpha OS=Homo sapiens GN=YWHAB	60110000	49818000	71186000	55958000	50511000	66875000	131860000	122380000	123800000	119270000	96032000	119630000	135080000	111060000	121310000	143730000	142590000	147970000	126350000	114390000	112000000	138630000	145590000	144360000
P31947-2;P31947	14-3-3 protein sigma	SFN	>sp|P31947-2|1433S_HUMAN Isoform 2 of 14-3-3 protein sigma OS=Homo sapiens GN=SFN;>sp|P31947|1433S_HUMAN 14-3-3 protein sigma OS=Homo sapiens GN=SFN PE=1 SV=1	47968000	42023000	38890000	24139000	50480000	61058000	126800000	102630000	116580000	93984000	75274000	77970000	118920000	109390000	112200000	48211000	81600000	81171000	103290000	93111000	1	1	81863000	75968000
P31948;G3XAD8;F5H0T1;F5H783;F5GXD8;H0YGI8	Stress-induced-phosphoprotein 1	STIP1	>sp|P31948|STIP1_HUMAN Stress-induced-phosphoprotein 1 OS=Homo sapiens GN=STIP1 PE=1 SV=1;>tr|G3XAD8|G3XAD8_HUMAN Stress-induced-phosphoprotein 1 OS=Homo sapiens GN=STIP1 PE=4 SV=1;>tr|F5H0T1|F5H0T1_HUMAN Stress-induced-phosphoprotein 1 OS=Homo sapiens GN=	85761000	179590000	499630000	666410000	230880000	207460000	209780000	195400000	273340000	251890000	213130000	243900000	125320000	163940000	134110000	112850000	180750000	177150000	98732000	106880000	67775000	131920000	177890000	154960000
P32119;A6NIW5;P32119-2	Peroxiredoxin-2	PRDX2	>sp|P32119|PRDX2_HUMAN Peroxiredoxin-2 OS=Homo sapiens GN=PRDX2 PE=1 SV=5;>tr|A6NIW5|A6NIW5_HUMAN Peroxiredoxin 2, isoform CRA_a OS=Homo sapiens GN=PRDX2 PE=4 SV=2	62938000	51167000	185630000	221070000	93975000	92502000	72118000	73491000	128160000	143770000	102540000	91330000	59197000	32307000	23220000	13061000	74911000	72136000	44968000	31405000	11863000	34990000	54465000	54627000
P33176;E9PET8;J3KNA1;O60282;Q12840;O60282-2	Kinesin-1 heavy chain;Kinesin heavy chain isoform 5C;Kinesin heavy chain isoform 5A	KIF5B;KIF5C;KIF5A	>sp|P33176|KINH_HUMAN Kinesin-1 heavy chain OS=Homo sapiens GN=KIF5B PE=1 SV=1;>tr|E9PET8|E9PET8_HUMAN Kinesin heavy chain isoform 5C OS=Homo sapiens GN=KIF5C PE=2 SV=2;>tr|J3KNA1|J3KNA1_HUMAN Kinesin heavy chain isoform 5A OS=Homo sapiens GN=KIF5A PE=2 SV	14404000	23452000	14420000	17499000	33654000	19736000	12092000	16744000	17486000	23061000	14368000	21589000	10879000	8683800	16502000	8928400	8743400	11284000	17918000	1	16762000	1	10133000	11334000
P33316-2;H0YNW5;H0YKC5;P33316;H0YMM5;H0YNJ9;H0YKI0;H0YMP1	Deoxyuridine 5-triphosphate nucleotidohydrolase, mitochondrial	DUT	>sp|P33316-2|DUT_HUMAN Isoform 2 of Deoxyuridine 5-triphosphate nucleotidohydrolase, mitochondrial OS=Homo sapiens GN=DUT;>tr|H0YNW5|H0YNW5_HUMAN Deoxyuridine 5-triphosphate nucleotidohydrolase, mitochondrial OS=Homo sapiens GN=DUT PE=2 SV=1;>tr|H0YKC5|H	7801200	11173000	14822000	3364000	17021000	5645600	10386000	10510000	17931000	6853600	8997900	5861800	7148900	9075100	1	1	55759000	1	5376800	14833000	1	1	1	1
P33991;E5RG31;E5RFJ8	DNA replication licensing factor MCM4	MCM4	>sp|P33991|MCM4_HUMAN DNA replication licensing factor MCM4 OS=Homo sapiens GN=MCM4 PE=1 SV=5	33371000	34952000	77797000	77416000	33594000	48425000	36715000	27759000	49228000	36669000	35339000	31687000	25992000	22566000	12759000	15155000	19734000	41089000	13597000	13437000	8300700	12616000	13725000	27740000
P33992;B1AHB1;B1AHB2;B1AHA9	DNA replication licensing factor MCM5	MCM5	>sp|P33992|MCM5_HUMAN DNA replication licensing factor MCM5 OS=Homo sapiens GN=MCM5 PE=1 SV=5;>tr|B1AHB1|B1AHB1_HUMAN DNA replication licensing factor MCM5 OS=Homo sapiens GN=MCM5 PE=3 SV=1	49488000	59647000	47680000	89171000	152450000	138710000	83692000	97451000	97965000	114100000	94160000	84849000	33349000	43647000	18877000	20346000	66932000	55978000	58402000	59421000	27947000	27541000	36703000	24621000
P33993;P33993-3;P33993-2;C9J8M6	DNA replication licensing factor MCM7	MCM7	>sp|P33993|MCM7_HUMAN DNA replication licensing factor MCM7 OS=Homo sapiens GN=MCM7 PE=1 SV=4;>sp|P33993-3|MCM7_HUMAN Isoform 3 of DNA replication licensing factor MCM7 OS=Homo sapiens GN=MCM7;>sp|P33993-2|MCM7_HUMAN Isoform 2 of DNA replication licensing	47598000	32194000	62993000	51689000	40237000	51755000	43027000	22813000	44621000	65356000	52004000	47365000	43798000	29291000	28245000	27809000	34042000	55961000	29090000	29744000	19629000	21560000	27112000	19476000
P34897-3;P34897;B4DLV4;P34897-2;G3V2Y4;H0YIZ0;G3V5L0;G3V4W5;G3V2D2;G3V540;P34896-4	Serine hydroxymethyltransferase, mitochondrial;Serine hydroxymethyltransferase	SHMT2	>sp|P34897-3|GLYM_HUMAN Isoform 3 of Serine hydroxymethyltransferase, mitochondrial OS=Homo sapiens GN=SHMT2;>sp|P34897|GLYM_HUMAN Serine hydroxymethyltransferase, mitochondrial OS=Homo sapiens GN=SHMT2 PE=1 SV=3;>tr|B4DLV4|B4DLV4_HUMAN Serine hydroxymethy	7571600	11808000	30613000	18624000	19550000	22752000	15321000	1	16958000	15082000	22758000	19280000	14458000	9560800	13266000	10135000	27544000	13805000	7580000	8874600	1	11690000	10649000	1
P34931	Heat shock 70 kDa protein 1-like	HSPA1L	>sp|P34931|HS71L_HUMAN Heat shock 70 kDa protein 1-like OS=Homo sapiens GN=HSPA1L PE=1 SV=2	1	1	1	1	1	1	1	1	1	1	1	1	1726300	1	8708100	1	1	1	1	1	1	1	1	1
P34932	Heat shock 70 kDa protein 4	HSPA4	>sp|P34932|HSP74_HUMAN Heat shock 70 kDa protein 4 OS=Homo sapiens GN=HSPA4 PE=1 SV=4	115590000	99090000	217830000	103290000	92398000	114720000	91946000	84271000	104380000	109760000	86268000	94142000	82108000	82877000	83978000	100670000	120980000	138740000	86460000	72597000	83238000	76737000	98502000	104190000
P35232;C9JW96;C9JZ20;E7ESE2;E9PCW0;B4DY47;D6RBK0	Prohibitin	PHB	>sp|P35232|PHB_HUMAN Prohibitin OS=Homo sapiens GN=PHB PE=1 SV=1;>tr|C9JW96|C9JW96_HUMAN Prohibitin (Fragment) OS=Homo sapiens GN=PHB PE=2 SV=2;>tr|C9JZ20|C9JZ20_HUMAN Prohibitin (Fragment) OS=Homo sapiens GN=PHB PE=2 SV=1;>tr|E7ESE2|E7ESE2_HUMAN Prohibiti	123910000	144570000	240970000	267390000	140490000	152810000	364400000	460410000	305420000	283640000	315520000	322040000	679250000	657620000	1020100000	677660000	783090000	749660000	313090000	290360000	585350000	606600000	454710000	442310000
P35250;H7C5S7;H7C5P1;H7C5Q7;F8WC37;H7C5A0;H7C5G4;P35250-2	Replication factor C subunit 2	RFC2	>sp|P35250|RFC2_HUMAN Replication factor C subunit 2 OS=Homo sapiens GN=RFC2 PE=1 SV=3;>tr|H7C5S7|H7C5S7_HUMAN Replication factor C subunit 2 (Fragment) OS=Homo sapiens GN=RFC2 PE=2 SV=1;>tr|H7C5P1|H7C5P1_HUMAN Replication factor C subunit 2 (Fragment) OS=	4978200	4825200	1	1	4792600	5383000	8841200	8996400	5140000	4497300	1	1	1	1	1	1	4715000	7060800	11215000	7206500	1	1	7379300	1
P35527;CON__P35527;K7EQQ3	Keratin, type I cytoskeletal 9	KRT9	>sp|P35527|K1C9_HUMAN Keratin, type I cytoskeletal 9 OS=Homo sapiens GN=KRT9 PE=1 SV=3;>P35527 SWISS-PROT:P35527 Tax_Id=9606 Gene_Symbol=KRT9 Keratin, type I cytoskeletal 9;>tr|K7EQQ3|K7EQQ3_HUMAN Keratin, type I cytoskeletal 9 OS=Homo sapiens GN=KRT9 PE=2	81203000	184740000	16138000000	16587000000	2898300000	2995200000	2444700000	2404100000	5663700000	5323000000	8827000000	7855400000	2570000000	2469500000	2776200000	2812900000	1697700000	1701000000	4185600000	4564100000	660040000	638050000	3899700000	4009300000
P35579;P35579-2;Q5BKV1;B1AH99	Myosin-9	MYH9	>sp|P35579|MYH9_HUMAN Myosin-9 OS=Homo sapiens GN=MYH9 PE=1 SV=4;>sp|P35579-2|MYH9_HUMAN Isoform 2 of Myosin-9 OS=Homo sapiens GN=MYH9	258040000	266850000	387380000	407780000	466230000	344580000	272690000	225620000	569790000	570160000	394430000	316220000	187460000	173210000	31214000	86815000	271250000	259920000	1964200000	2000200000	59531000	96301000	581390000	555080000
P35580;P35580-2;F8W6L6;P35580-3;P35580-4;E7ERA5	Myosin-10	MYH10	>sp|P35580|MYH10_HUMAN Myosin-10 OS=Homo sapiens GN=MYH10 PE=1 SV=3;>sp|P35580-2|MYH10_HUMAN Isoform 2 of Myosin-10 OS=Homo sapiens GN=MYH10;>tr|F8W6L6|F8W6L6_HUMAN Myosin-10 OS=Homo sapiens GN=MYH10 PE=2 SV=1;>sp|P35580-3|MYH10_HUMAN Isoform 3 of Myosin-1	13421000	20327000	34223000	1	56175000	19066000	16530000	17661000	14739000	54613000	15303000	13183000	3819600	16289000	8289100	11229000	28867000	20966000	87477000	39858000	9997500	8261800	15372000	15269000
P35613-2;P35613;P35613-3;P35613-4;I3L192;R4GMX5;R4GN83	Basigin	BSG	>sp|P35613-2|BASI_HUMAN Isoform 2 of Basigin OS=Homo sapiens GN=BSG;>sp|P35613|BASI_HUMAN Basigin OS=Homo sapiens GN=BSG PE=1 SV=2;>sp|P35613-3|BASI_HUMAN Isoform 3 of Basigin OS=Homo sapiens GN=BSG;>sp|P35613-4|BASI_HUMAN Isoform 4 of Basigin OS=Homo sapi	9403000	4078500	40659000	42300000	11249000	10070000	46282000	63658000	51601000	42370000	42464000	32528000	105620000	157730000	210720000	239690000	193910000	263990000	69634000	84717000	169310000	170740000	127700000	118170000
P35637-2;P35637;H3BPE7;K7EPT6;Q92804-2;Q92804	RNA-binding protein FUS	FUS	>sp|P35637-2|FUS_HUMAN Isoform Short of RNA-binding protein FUS OS=Homo sapiens GN=FUS;>sp|P35637|FUS_HUMAN RNA-binding protein FUS OS=Homo sapiens GN=FUS PE=1 SV=1;>tr|H3BPE7|H3BPE7_HUMAN RNA-binding protein FUS OS=Homo sapiens GN=FUS PE=2 SV=1	140400000	185930000	98317000	70772000	289780000	309030000	108620000	150760000	129700000	137010000	161180000	156340000	73113000	90038000	89930000	122410000	109430000	108690000	137530000	137240000	77338000	72429000	66840000	59048000
P35659;D6RDA2;D6R9L5;H0Y993;P35659-2;B4DFG0	Protein DEK	DEK	>sp|P35659|DEK_HUMAN Protein DEK OS=Homo sapiens GN=DEK PE=1 SV=1;>tr|D6RDA2|D6RDA2_HUMAN Protein DEK (Fragment) OS=Homo sapiens GN=DEK PE=2 SV=1;>tr|D6R9L5|D6R9L5_HUMAN Protein DEK (Fragment) OS=Homo sapiens GN=DEK PE=2 SV=1;>tr|H0Y993|H0Y993_HUMAN Protei	1	11946000	1	1	8620500	1	8424300	7011800	11588000	10744000	1	14277000	14201000	1	13770000	11526000	1	1	1	1	5852400	6188600	1	1
P35813;P35813-3;P35813-2;E9PKB5;E9PL75;E9PJN3;E9PP44	Protein phosphatase 1A	PPM1A	>sp|P35813|PPM1A_HUMAN Protein phosphatase 1A OS=Homo sapiens GN=PPM1A PE=1 SV=1;>sp|P35813-3|PPM1A_HUMAN Isoform 3 of Protein phosphatase 1A OS=Homo sapiens GN=PPM1A;>sp|P35813-2|PPM1A_HUMAN Isoform Alpha-2 of Protein phosphatase 1A OS=Homo sapiens GN=PPM	151100000	192360000	1	13437000	151560000	156370000	114690000	113590000	116970000	90977000	119120000	75720000	57653000	83931000	37497000	25297000	48407000	45715000	57969000	74051000	90145000	52610000	83828000	81280000
P35908	Keratin, type II cytoskeletal 2 epidermal	KRT2	>sp|P35908|K22E_HUMAN Keratin, type II cytoskeletal 2 epidermal OS=Homo sapiens GN=KRT2 PE=1 SV=2	354530000	478910000	6936500000	7173700000	6663400000	6620300000	2682400000	2997400000	8511200000	8175900000	25492000000	26045000000	2270600000	2308100000	3123500000	3273400000	1968100000	2055500000	5558000000	5770700000	823510000	837810000	4616700000	4328700000
P35998;B7Z5E2;C9JLS9	26S protease regulatory subunit 7	PSMC2	>sp|P35998|PRS7_HUMAN 26S protease regulatory subunit 7 OS=Homo sapiens GN=PSMC2 PE=1 SV=3;>tr|B7Z5E2|B7Z5E2_HUMAN 26S protease regulatory subunit 7 OS=Homo sapiens GN=PSMC2 PE=2 SV=1	206690000	214110000	81699000	128060000	174940000	188110000	190000000	212210000	182030000	190670000	204160000	220660000	182750000	166690000	141240000	139600000	130610000	138790000	153150000	155460000	124040000	134020000	130200000	140920000
P36578;H3BM89;H3BTP7;H3BU31	60S ribosomal protein L4	RPL4	>sp|P36578|RL4_HUMAN 60S ribosomal protein L4 OS=Homo sapiens GN=RPL4 PE=1 SV=5;>tr|H3BM89|H3BM89_HUMAN 60S ribosomal protein L4 OS=Homo sapiens GN=RPL4 PE=4 SV=1;>tr|H3BTP7|H3BTP7_HUMAN 60S ribosomal protein L4 (Fragment) OS=Homo sapiens GN=RPL4 PE=2 SV=1	1101300000	1142200000	902530000	714630000	1284500000	1144400000	1398000000	1399700000	1241300000	1186800000	1059900000	1151600000	1383500000	1439200000	1486700000	1621700000	1309400000	1267800000	1078200000	905400000	1328400000	1274200000	1018700000	1063500000
P36957;H0YJF9;G3V5M3;G3V3F0;Q86SW4;B7Z5W8	Dihydrolipoyllysine-residue succinyltransferase component of 2-oxoglutarate dehydrogenase complex, mitochondrial	DLST	>sp|P36957|ODO2_HUMAN Dihydrolipoyllysine-residue succinyltransferase component of 2-oxoglutarate dehydrogenase complex, mitochondrial OS=Homo sapiens GN=DLST PE=1 SV=4;>tr|H0YJF9|H0YJF9_HUMAN Dihydrolipoyllysine-residue succinyltransferase component of 2-	1	6224100	6894700	1	1	1	3672100	4853800	4606300	4839300	3780400	5231900	1	2930100	2407900	1	1	1	1	1	1	1	1	1
P37108;H0YLA2	Signal recognition particle 14 kDa protein	SRP14	>sp|P37108|SRP14_HUMAN Signal recognition particle 14 kDa protein OS=Homo sapiens GN=SRP14 PE=1 SV=2;>tr|H0YLA2|H0YLA2_HUMAN Signal recognition particle 14 kDa protein OS=Homo sapiens GN=SRP14 PE=2 SV=1	62150000	63365000	64172000	60003000	59646000	56181000	78697000	53901000	56189000	51806000	54921000	63341000	53093000	76165000	34987000	7309500	63395000	60246000	89396000	63752000	82695000	88463000	61957000	66335000
P37268;E9PNM1;B4DJE5;B4DT56;B7Z1J3;B3KQ95;E9PJG4;E9PS69	Squalene synthase	FDFT1	>sp|P37268|FDFT_HUMAN Squalene synthase OS=Homo sapiens GN=FDFT1 PE=1 SV=1;>tr|E9PNM1|E9PNM1_HUMAN Squalene synthase OS=Homo sapiens GN=FDFT1 PE=2 SV=1;>tr|B4DJE5|B4DJE5_HUMAN Squalene synthase OS=Homo sapiens GN=FDFT1 PE=2 SV=1;>tr|B4DT56|B4DT56_HUMAN Squ	1	1	1	4943900	1925100	3616700	61010000	66748000	48828000	24638000	41008000	38239000	206070000	258700000	193920000	244730000	276470000	245460000	149960000	177230000	186590000	163710000	208100000	225640000
P37802;C9J5W6;Q9UI15	Transgelin-2	TAGLN2	>sp|P37802|TAGL2_HUMAN Transgelin-2 OS=Homo sapiens GN=TAGLN2 PE=1 SV=3	25323000	28737000	109720000	80709000	37564000	35970000	45180000	48178000	82555000	80033000	52763000	60215000	42253000	33904000	71194000	15117000	64813000	67179000	37699000	27597000	40188000	31100000	45797000	49864000
P37837;F2Z393	Transaldolase	TALDO1	>sp|P37837|TALDO_HUMAN Transaldolase OS=Homo sapiens GN=TALDO1 PE=1 SV=2;>tr|F2Z393|F2Z393_HUMAN Transaldolase OS=Homo sapiens GN=TALDO1 PE=2 SV=1	1	11221000	105620000	102460000	21877000	23816000	27580000	11995000	28547000	31534000	25962000	27675000	16552000	26564000	15211000	16084000	41595000	14174000	7474400	9794900	12368000	12524000	15076000	11747000
P37840-2;E7EPV7;P37840;D6RA31;P37840-3;Q16143	Alpha-synuclein	SNCA	>sp|P37840-2|SYUA_HUMAN Isoform 2-4 of Alpha-synuclein OS=Homo sapiens GN=SNCA;>tr|E7EPV7|E7EPV7_HUMAN Alpha-synuclein OS=Homo sapiens GN=SNCA PE=2 SV=1;>sp|P37840|SYUA_HUMAN Alpha-synuclein OS=Homo sapiens GN=SNCA PE=1 SV=1;>tr|D6RA31|D6RA31_HUMAN Alpha-s	1	1	1	231570	1	1	164420	1	1	1	1	1	8194400	1859100	26045000	36519000	809230	1	173620	1840000	3809200000	3435800000	19245000	13197000
P38117;P38117-2;M0QY67	Electron transfer flavoprotein subunit beta	ETFB	>sp|P38117|ETFB_HUMAN Electron transfer flavoprotein subunit beta OS=Homo sapiens GN=ETFB PE=1 SV=3;>sp|P38117-2|ETFB_HUMAN Isoform 2 of Electron transfer flavoprotein subunit beta OS=Homo sapiens GN=ETFB;>tr|M0QY67|M0QY67_HUMAN Electron transfer flavoprot	7939600	13885000	11882000	13184000	9178400	9357000	8967600	7612700	9250800	11584000	8899200	8311600	10015000	9008600	1	1	11002000	4806500	7342500	6665600	8462900	8120200	25334000	6225500
P38159;P38159-2;H3BT71;H0Y6E7;Q96E39;B3KRG5;H3BUY5;H3BR27;P38159-3;H3BNC1;O75526;Q8N7X1	RNA-binding motif protein, X chromosome;RNA-binding motif protein, X chromosome, N-terminally processed;RNA binding motif protein, X-linked-like-1	RBMX;RBMXL1	>sp|P38159|RBMX_HUMAN RNA-binding motif protein, X chromosome OS=Homo sapiens GN=RBMX PE=1 SV=3;>sp|P38159-2|RBMX_HUMAN Isoform 2 of RNA-binding motif protein, X chromosome OS=Homo sapiens GN=RBMX;>tr|H3BT71|H3BT71_HUMAN RNA-binding motif protein, X chromo	419040000	475000000	97722000	112860000	399260000	362240000	203850000	191220000	212000000	194710000	232240000	206970000	112470000	104400000	85798000	102550000	94334000	73099000	367760000	347320000	117210000	119170000	132330000	148500000
P38646;D6RJI2;H0YBG6;D6RA73;H0Y8S0	Stress-70 protein, mitochondrial	HSPA9	>sp|P38646|GRP75_HUMAN Stress-70 protein, mitochondrial OS=Homo sapiens GN=HSPA9 PE=1 SV=2	302500000	289110000	528630000	518220000	312320000	296740000	354270000	322030000	411070000	407920000	327390000	319270000	347460000	318330000	323910000	298670000	375740000	374390000	371540000	430280000	468510000	400300000	509930000	544720000
P38919;I3L3H2;J3QQP0;E9PBH4;F8WE11	Eukaryotic initiation factor 4A-III;Eukaryotic initiation factor 4A-III, N-terminally processed	EIF4A3	>sp|P38919|IF4A3_HUMAN Eukaryotic initiation factor 4A-III OS=Homo sapiens GN=EIF4A3 PE=1 SV=4	302080000	276310000	157580000	287300000	301710000	278640000	404990000	374970000	329890000	315790000	360060000	366190000	415050000	380790000	428480000	394970000	416010000	401970000	709470000	671090000	768720000	819020000	661130000	655940000
P39019;M0R2L9;M0QXK4;M0QYF7;M0R140	40S ribosomal protein S19	RPS19	>sp|P39019|RS19_HUMAN 40S ribosomal protein S19 OS=Homo sapiens GN=RPS19 PE=1 SV=2	1150000000	1166100000	710220000	800430000	1167600000	1183100000	1347800000	1196000000	1110200000	1047300000	1079400000	1084100000	1148600000	1225000000	1224700000	1343700000	1094700000	1287600000	1160200000	900720000	1036800000	998500000	1095300000	1059600000
P39023;G5E9G0;H7C422;H7C3M2;B5MCW2;F8WCR1;Q92901	60S ribosomal protein L3	RPL3	>sp|P39023|RL3_HUMAN 60S ribosomal protein L3 OS=Homo sapiens GN=RPL3 PE=1 SV=2;>tr|G5E9G0|G5E9G0_HUMAN 60S ribosomal protein L3 OS=Homo sapiens GN=RPL3 PE=2 SV=1;>tr|H7C422|H7C422_HUMAN 60S ribosomal protein L3 (Fragment) OS=Homo sapiens GN=RPL3 PE=2 SV=1	1017000000	1010400000	485210000	429260000	829310000	901940000	1177600000	986170000	905800000	792000000	835710000	858280000	937600000	1102100000	1290600000	1134000000	946640000	990880000	725980000	748280000	859690000	847190000	843600000	727050000
P39656;E7EWT1;U3KQ84	Dolichyl-diphosphooligosaccharide--protein glycosyltransferase 48 kDa subunit	DDOST	>sp|P39656|OST48_HUMAN Dolichyl-diphosphooligosaccharide--protein glycosyltransferase 48 kDa subunit OS=Homo sapiens GN=DDOST PE=1 SV=4;>tr|E7EWT1|E7EWT1_HUMAN Dolichyl-diphosphooligosaccharide--protein glycosyltransferase 48 kDa subunit OS=Homo sapiens GN	16192000	21353000	64388000	59816000	29887000	25828000	55462000	54979000	42251000	47937000	75712000	75430000	78046000	110630000	128780000	132880000	109550000	88351000	50584000	46718000	113540000	90576000	71551000	52765000
P39880-6;P39880-4;P39880-5;P39880-2;P39880;P39880-3;P39880-9;Q13948-9;Q13948-10;Q13948-2;Q13948	Homeobox protein cut-like 1;Protein CASP	CUX1	>sp|P39880-6|CUX1_HUMAN Isoform 7 of Homeobox protein cut-like 1 OS=Homo sapiens GN=CUX1;>sp|P39880-4|CUX1_HUMAN Isoform 5 of Homeobox protein cut-like 1 OS=Homo sapiens GN=CUX1;>sp|P39880-5|CUX1_HUMAN Isoform 6 of Homeobox protein cut-like 1 OS=Homo sapie	1	1	1	1	1	1	6821100	1	1	10895000	9665800	1	1	1	1	1	1	1	20785000	1	1	1	1	1
P40227;B4DPJ8;P40227-2;J3KRI6	T-complex protein 1 subunit zeta	CCT6A	>sp|P40227|TCPZ_HUMAN T-complex protein 1 subunit zeta OS=Homo sapiens GN=CCT6A PE=1 SV=3;>tr|B4DPJ8|B4DPJ8_HUMAN T-complex protein 1 subunit zeta OS=Homo sapiens GN=CCT6A PE=2 SV=1;>sp|P40227-2|TCPZ_HUMAN Isoform 2 of T-complex protein 1 subunit zeta OS=H	675250000	670330000	705620000	863730000	714830000	732660000	602720000	550860000	608440000	676920000	656320000	721580000	445000000	557460000	389000000	392200000	515480000	561670000	463710000	430300000	500770000	438410000	424130000	413730000
P40429;M0QYS1;Q6NVV1;M0QZU1	60S ribosomal protein L13a	RPL13A	>sp|P40429|RL13A_HUMAN 60S ribosomal protein L13a OS=Homo sapiens GN=RPL13A PE=1 SV=2;>tr|M0QYS1|M0QYS1_HUMAN 60S ribosomal protein L13a (Fragment) OS=Homo sapiens GN=RPL13A PE=4 SV=2	521650000	429630000	33019000	183240000	419450000	369580000	451540000	442400000	347110000	310990000	296780000	331290000	325720000	357450000	330610000	524260000	342390000	307200000	297860000	299020000	495990000	473620000	382580000	335460000
P40926;G3XAL0;E9PDB2	Malate dehydrogenase, mitochondrial;Malate dehydrogenase	MDH2	>sp|P40926|MDHM_HUMAN Malate dehydrogenase, mitochondrial OS=Homo sapiens GN=MDH2 PE=1 SV=3;>tr|G3XAL0|G3XAL0_HUMAN Malate dehydrogenase OS=Homo sapiens GN=MDH2 PE=3 SV=1;>tr|E9PDB2|E9PDB2_HUMAN Malate dehydrogenase, mitochondrial OS=Homo sapiens GN=MDH2 P	94943000	95471000	449800000	333970000	138630000	130690000	75635000	86238000	193150000	191340000	141410000	145530000	93721000	92155000	108990000	92104000	177000000	187710000	67550000	55801000	22989000	56990000	99818000	94231000
P40937-2;P40937;F8W9B4;E9PEP3;F5H5S0;C9JH72;F5H304;F5H0U6	Replication factor C subunit 5	RFC5	>sp|P40937-2|RFC5_HUMAN Isoform 2 of Replication factor C subunit 5 OS=Homo sapiens GN=RFC5;>sp|P40937|RFC5_HUMAN Replication factor C subunit 5 OS=Homo sapiens GN=RFC5 PE=1 SV=1;>tr|F8W9B4|F8W9B4_HUMAN Replication factor C subunit 5 OS=Homo sapiens GN=RFC	7433500	10387000	20856000	15558000	9085400	16001000	13775000	17806000	14666000	18735000	14282000	15050000	28913000	17730000	11452000	14748000	18701000	1	17988000	17503000	8241000	14143000	1	23898000
P40938-2;P40938	Replication factor C subunit 3	RFC3	>sp|P40938-2|RFC3_HUMAN Isoform 2 of Replication factor C subunit 3 OS=Homo sapiens GN=RFC3;>sp|P40938|RFC3_HUMAN Replication factor C subunit 3 OS=Homo sapiens GN=RFC3 PE=1 SV=2	5095400	7217900	8063000	9229100	5247000	6418900	8363300	6092800	7193400	7110800	8023900	7348800	8962200	8226100	1	1	9067000	11243000	7583200	8992300	1	8372800	7426400	7785500
P40939;H0YFD6;P40939-2	Trifunctional enzyme subunit alpha, mitochondrial;Long-chain enoyl-CoA hydratase;Long chain 3-hydroxyacyl-CoA dehydrogenase	HADHA	>sp|P40939|ECHA_HUMAN Trifunctional enzyme subunit alpha, mitochondrial OS=Homo sapiens GN=HADHA PE=1 SV=2	99908000	94024000	63667000	28873000	134830000	48573000	1529400000	1584400000	943370000	1022900000	1288200000	1256000000	3651400000	4000500000	3644800000	3501400000	3034000000	2945400000	4975700000	5504400000	7290600000	6211100000	6425600000	5931400000
P41091;Q2VIR3;Q2VIR3-2;F8W810;H7BZU1	Eukaryotic translation initiation factor 2 subunit 3;Putative eukaryotic translation initiation factor 2 subunit 3-like protein	EIF2S3;EIF2S3L	>sp|P41091|IF2G_HUMAN Eukaryotic translation initiation factor 2 subunit 3 OS=Homo sapiens GN=EIF2S3 PE=1 SV=3;>sp|Q2VIR3|IF2GL_HUMAN Putative eukaryotic translation initiation factor 2 subunit 3-like protein OS=Homo sapiens GN=EIF2S3L PE=5 SV=2;>sp|Q2VIR3	69966000	85878000	215830000	226310000	69142000	83742000	59261000	57209000	65471000	83330000	64972000	78491000	65431000	76024000	86510000	98424000	113000000	98382000	62076000	56890000	102430000	99103000	85641000	79341000
P41227-2;P41227;C9JN83;F8W808;A8MWP7;C9JW55;Q9BSU3	N-alpha-acetyltransferase 10	NAA10	>sp|P41227-2|NAA10_HUMAN Isoform 2 of N-alpha-acetyltransferase 10 OS=Homo sapiens GN=NAA10;>sp|P41227|NAA10_HUMAN N-alpha-acetyltransferase 10 OS=Homo sapiens GN=NAA10 PE=1 SV=1;>tr|C9JN83|C9JN83_HUMAN N-alpha-acetyltransferase 10 (Fragment) OS=Homo sapie	10700000	11030000	13940000	1	10537000	5859700	6616300	10696000	11794000	10905000	8435500	9583700	6052500	7896700	1	1	7935900	7309500	7296500	11264000	1	1	7315500	1
P41250	Glycine--tRNA ligase	GARS	>sp|P41250|SYG_HUMAN Glycine--tRNA ligase OS=Homo sapiens GN=GARS PE=1 SV=3	1	1	9875000	11922000	5723200	6486600	1	8869300	1	1	7210100	10897000	6155000	4452700	3977100	8486700	9676000	8872800	5188400	4687200	5309600	10988000	7007800	5507900
P41567;K7EM18	Eukaryotic translation initiation factor 1	EIF1	>sp|P41567|EIF1_HUMAN Eukaryotic translation initiation factor 1 OS=Homo sapiens GN=EIF1 PE=1 SV=1;>tr|K7EM18|K7EM18_HUMAN Eukaryotic translation initiation factor 1 OS=Homo sapiens GN=EIF1 PE=2 SV=1	6688600	8997300	1	1	1	10557000	1	1	13460000	1	1	1	1	11761000	1	1	1	1	6829500	1	1	1	1	1
P42166	Lamina-associated polypeptide 2, isoform alpha;Thymopoietin;Thymopentin	TMPO	>sp|P42166|LAP2A_HUMAN Lamina-associated polypeptide 2, isoform alpha OS=Homo sapiens GN=TMPO PE=1 SV=2	7612500	8068200	10062000	8596700	4705000	5518500	3531900	12264000	51727000	31252000	19855000	10161000	4552200	5946200	1	1	3816100	4975900	47247000	80556000	1	3078700	3046800	3205400
P42167;G5E972;P42167-2;A2T926;H0YJH7	Lamina-associated polypeptide 2, isoforms beta/gamma;Thymopoietin;Thymopentin	TMPO	>sp|P42167|LAP2B_HUMAN Lamina-associated polypeptide 2, isoforms beta/gamma OS=Homo sapiens GN=TMPO PE=1 SV=2;>tr|G5E972|G5E972_HUMAN Thymopentin OS=Homo sapiens GN=TMPO PE=4 SV=1;>sp|P42167-2|LAP2B_HUMAN Isoform Gamma of Lamina-associated polypeptide 2, i	552410000	468140000	228020000	238120000	460670000	412930000	410260000	425810000	402540000	432550000	400220000	359790000	308580000	337360000	331880000	319720000	285100000	288100000	428660000	499090000	344750000	370400000	317800000	337440000
P42345;B1AKP8;B1AKQ2	Serine/threonine-protein kinase mTOR	MTOR	>sp|P42345|MTOR_HUMAN Serine/threonine-protein kinase mTOR OS=Homo sapiens GN=MTOR PE=1 SV=1	18384000	10691000	18723000	8657200	3589200	24808000	42899000	47457000	19988000	24967000	35198000	33200000	300070000	467510000	538440000	379120000	346160000	313590000	98191000	53284000	179740000	197490000	71871000	45463000
P42356;J3KN10;P42356-2;Q8N8J0;A4QPH2-2;A4QPH2-3;A4QPH2	Phosphatidylinositol 4-kinase alpha	PI4KA	>sp|P42356|PI4KA_HUMAN Phosphatidylinositol 4-kinase alpha OS=Homo sapiens GN=PI4KA PE=1 SV=3;>tr|J3KN10|J3KN10_HUMAN Phosphatidylinositol 4-kinase alpha OS=Homo sapiens GN=PI4KA PE=2 SV=1;>sp|P42356-2|PI4KA_HUMAN Isoform 2 of Phosphatidylinositol 4-kinase	2329600	1599700	1	1	1	1	2154200	1794000	1739200	1	1	1	2676400	3591400	1	1	2679100	2111200	1	1802400	1	1	2356800	2725500
P42677;Q5T4L4;C9J1C5	40S ribosomal protein S27	RPS27	>sp|P42677|RS27_HUMAN 40S ribosomal protein S27 OS=Homo sapiens GN=RPS27 PE=1 SV=3;>tr|Q5T4L4|Q5T4L4_HUMAN 40S ribosomal protein S27 OS=Homo sapiens GN=RPS27 PE=4 SV=1	247120000	286760000	285490000	299750000	185950000	161330000	332160000	335680000	363680000	305770000	307540000	367640000	376600000	445240000	317580000	312360000	365220000	321710000	586730000	465880000	436440000	419280000	411620000	430290000
P42695;G3V1A9;E9PKK4;E9PQA3;E9PLE0	Condensin-2 complex subunit D3	NCAPD3	>sp|P42695|CNDD3_HUMAN Condensin-2 complex subunit D3 OS=Homo sapiens GN=NCAPD3 PE=1 SV=2;>tr|G3V1A9|G3V1A9_HUMAN Condensin-2 complex subunit D3 OS=Homo sapiens GN=NCAPD3 PE=4 SV=1	2957200	5513700	1	24208000	4817600	5511800	24320000	26568000	12776000	12181000	16372000	21271000	72669000	63762000	68679000	94972000	66961000	68118000	36192000	45349000	38396000	38619000	55367000	48074000
P42704;B8ZZ38;C9JCA9;H7C3W8;Q9NP80-3;Q9NP80-2;J3KPL1;Q9NP80	Leucine-rich PPR motif-containing protein, mitochondrial	LRPPRC	>sp|P42704|LPPRC_HUMAN Leucine-rich PPR motif-containing protein, mitochondrial OS=Homo sapiens GN=LRPPRC PE=1 SV=3	913980000	1019200000	3730400000	3394700000	586570000	578950000	498790000	508070000	572600000	592340000	526150000	533300000	640010000	569640000	579690000	651770000	532840000	560230000	539290000	576490000	714670000	788660000	614000000	637510000
P42766;F2Z388	60S ribosomal protein L35	RPL35	>sp|P42766|RL35_HUMAN 60S ribosomal protein L35 OS=Homo sapiens GN=RPL35 PE=1 SV=2;>tr|F2Z388|F2Z388_HUMAN 60S ribosomal protein L35 OS=Homo sapiens GN=RPL35 PE=3 SV=1	560870000	586350000	244590000	246080000	508690000	544010000	536120000	621160000	540740000	532280000	619420000	551260000	504550000	420230000	505420000	548060000	481100000	460460000	472550000	403380000	385580000	347550000	414280000	384230000
P43243;A8MXP9;D6REM6;D6R991;B3KM87;P43243-2;H0Y8T4;D6RAM9;D6RAY2;D6RBI2;D6RBK5;D6RE02;D6RIA2;D6RB45;D6RGW7;D6R9F3;D6RBS2;D6RCM3;D6REK4;D6R8Z5	Matrin-3	MATR3	>sp|P43243|MATR3_HUMAN Matrin-3 OS=Homo sapiens GN=MATR3 PE=1 SV=2;>tr|A8MXP9|A8MXP9_HUMAN Matrin-3 OS=Homo sapiens GN=MATR3 PE=4 SV=1;>tr|D6REM6|D6REM6_HUMAN Matrin-3 OS=Homo sapiens GN=MATR3 PE=2 SV=1;>tr|D6R991|D6R991_HUMAN Matrin-3 (Fragment) OS=Homo s	370730000	354070000	48317000	33553000	242940000	297430000	167810000	141490000	152020000	155080000	124970000	136920000	58758000	61847000	32164000	18554000	53968000	54387000	160720000	181530000	2832700	3945800	87023000	87409000
P43487;C9JXG8;H7C137;C9JJ34;C9JGV6;C9JDM3;B3KUP2;C9JIC6;Q9C010;Q9C010-2;Q5T0Z6	Ran-specific GTPase-activating protein	RANBP1	>sp|P43487|RANG_HUMAN Ran-specific GTPase-activating protein OS=Homo sapiens GN=RANBP1 PE=1 SV=1;>tr|C9JXG8|C9JXG8_HUMAN Ran-specific GTPase-activating protein (Fragment) OS=Homo sapiens GN=RANBP1 PE=2 SV=2;>tr|H7C137|H7C137_HUMAN Ran-specific GTPase-activ	89780000	81735000	225590000	172290000	130290000	132660000	177220000	156860000	189210000	184840000	215140000	173850000	211740000	221010000	271950000	284410000	263010000	253210000	111480000	127560000	184760000	204070000	151880000	165930000
P43686;P43686-2	26S protease regulatory subunit 6B	PSMC4	>sp|P43686|PRS6B_HUMAN 26S protease regulatory subunit 6B OS=Homo sapiens GN=PSMC4 PE=1 SV=2;>sp|P43686-2|PRS6B_HUMAN Isoform 2 of 26S protease regulatory subunit 6B OS=Homo sapiens GN=PSMC4	208600000	167870000	105940000	59373000	166730000	157720000	177490000	145570000	159450000	162190000	137280000	126570000	115210000	93335000	85908000	109490000	122570000	112280000	106770000	121800000	124090000	122200000	108760000	108920000
P45880-2;P45880;P45880-1;B4DKM5;Q5JSD2;Q5JSD1;A2A3S1	Voltage-dependent anion-selective channel protein 2	VDAC2	>sp|P45880-2|VDAC2_HUMAN Isoform 2 of Voltage-dependent anion-selective channel protein 2 OS=Homo sapiens GN=VDAC2;>sp|P45880|VDAC2_HUMAN Voltage-dependent anion-selective channel protein 2 OS=Homo sapiens GN=VDAC2 PE=1 SV=2;>sp|P45880-1|VDAC2_HUMAN Isofor	35253000	46223000	73265000	119720000	62894000	56459000	134290000	133220000	114070000	118920000	109850000	99840000	240230000	225570000	241020000	302070000	234760000	259890000	116090000	122260000	228750000	201840000	175690000	159280000
P46060;F8W7I9;B0QYT5;B0QYT4;H0Y4Q3;B0QYT6	Ran GTPase-activating protein 1	RANGAP1	>sp|P46060|RAGP1_HUMAN Ran GTPase-activating protein 1 OS=Homo sapiens GN=RANGAP1 PE=1 SV=1;>tr|F8W7I9|F8W7I9_HUMAN Ran GTPase-activating protein 1 OS=Homo sapiens GN=RANGAP1 PE=2 SV=1	14708000	23306000	22327000	36343000	33571000	39487000	75426000	49947000	59239000	45994000	60946000	59429000	74446000	80190000	62147000	51935000	119760000	88427000	51221000	43812000	59055000	26416000	73455000	59224000
P46109	Crk-like protein	CRKL	>sp|P46109|CRKL_HUMAN Crk-like protein OS=Homo sapiens GN=CRKL PE=1 SV=1	40245000	40829000	30644000	29382000	33858000	30121000	32624000	21802000	34306000	39602000	26705000	24396000	15902000	21013000	22745000	22826000	18091000	22376000	26171000	24980000	21471000	1	26664000	24278000
P46777;Q5T7N0;R4GNJ2	60S ribosomal protein L5	RPL5	>sp|P46777|RL5_HUMAN 60S ribosomal protein L5 OS=Homo sapiens GN=RPL5 PE=1 SV=3	763590000	500390000	322540000	327440000	531420000	541100000	507070000	465830000	402080000	415910000	440190000	447170000	593290000	744150000	817110000	989630000	689030000	666030000	409340000	552690000	605900000	757330000	630880000	583040000
P46778;G3V1B3;M0R181;M0R3I5	60S ribosomal protein L21	RPL21	>sp|P46778|RL21_HUMAN 60S ribosomal protein L21 OS=Homo sapiens GN=RPL21 PE=1 SV=2;>tr|G3V1B3|G3V1B3_HUMAN 60S ribosomal protein L21 OS=Homo sapiens GN=RPL21 PE=4 SV=1;>tr|M0R181|M0R181_HUMAN 60S ribosomal protein L21 (Fragment) OS=Homo sapiens GN=RPL21 PE	734670000	749350000	368930000	343830000	692740000	715170000	733020000	726310000	580200000	559520000	550620000	475280000	632890000	666820000	636290000	907070000	746760000	1037600000	450290000	365630000	710240000	714400000	659380000	610270000
P46779;P46779-2;P46779-3;H0YKD8;P46779-4;P46779-5;H0YMF4;H0YLP6	60S ribosomal protein L28	RPL28	>sp|P46779|RL28_HUMAN 60S ribosomal protein L28 OS=Homo sapiens GN=RPL28 PE=1 SV=3;>sp|P46779-2|RL28_HUMAN Isoform 2 of 60S ribosomal protein L28 OS=Homo sapiens GN=RPL28;>sp|P46779-3|RL28_HUMAN Isoform 3 of 60S ribosomal protein L28 OS=Homo sapiens GN=RPL	871750000	735810000	91892000	150880000	657250000	617100000	764820000	594050000	608470000	552680000	473370000	441740000	577440000	496200000	545350000	413700000	556720000	468830000	410670000	456010000	367550000	394370000	402730000	464680000
P46781;B5MCT8;C9JM19;F2Z3C0;A8MXK4	40S ribosomal protein S9	RPS9	>sp|P46781|RS9_HUMAN 40S ribosomal protein S9 OS=Homo sapiens GN=RPS9 PE=1 SV=3;>tr|B5MCT8|B5MCT8_HUMAN 40S ribosomal protein S9 OS=Homo sapiens GN=RPS9 PE=3 SV=1;>tr|C9JM19|C9JM19_HUMAN 40S ribosomal protein S9 OS=Homo sapiens GN=RPS9 PE=3 SV=1	1467800000	1634400000	1546400000	1398200000	1417200000	1490000000	1570000000	1523600000	1341100000	1355100000	1522500000	1282600000	1609300000	1524500000	1633400000	1300300000	1340600000	1365800000	1308700000	1370800000	1528500000	1466400000	1472600000	1504800000
P46783;F6U211;S4R435;Q9NQ39	40S ribosomal protein S10	RPS10	>sp|P46783|RS10_HUMAN 40S ribosomal protein S10 OS=Homo sapiens GN=RPS10 PE=1 SV=1;>tr|F6U211|F6U211_HUMAN 40S ribosomal protein S10 OS=Homo sapiens GN=RPS10 PE=4 SV=1;>tr|S4R435|S4R435_HUMAN Protein RPS10-NUDT3 (Fragment) OS=Homo sapiens GN=RPS10-NUDT3 PE	403970000	440300000	463170000	355500000	392900000	338260000	373360000	400060000	362090000	339440000	338910000	311800000	492590000	512150000	571200000	583160000	611790000	491010000	389980000	288310000	511620000	541840000	408090000	402760000
P46821;D6RA40;D6RA32;P78559;P78559-2;J3KPX8;E9PGC8	Microtubule-associated protein 1B;MAP1B heavy chain;MAP1 light chain LC1	MAP1B	>sp|P46821|MAP1B_HUMAN Microtubule-associated protein 1B OS=Homo sapiens GN=MAP1B PE=1 SV=2	129280000	152490000	1	1	130230000	147510000	29821000	51801000	52398000	45672000	26754000	32178000	16560000	13670000	1	10566000	4634300	9181000	28547000	18472000	1	16223000	5087000	7121700
P46940;H0YLE8;F2Z2E2;Q86VI3	Ras GTPase-activating-like protein IQGAP1	IQGAP1	>sp|P46940|IQGA1_HUMAN Ras GTPase-activating-like protein IQGAP1 OS=Homo sapiens GN=IQGAP1 PE=1 SV=1;>tr|H0YLE8|H0YLE8_HUMAN Ras GTPase-activating-like protein IQGAP1 OS=Homo sapiens GN=IQGAP1 PE=2 SV=1	6902300	7363400	12250000	10380000	10922000	9567800	17391000	9716600	11938000	14828000	9626000	9673700	9678900	8085100	1	1	9520900	1	9523200	9469800	1	1	12486000	11719000
P46977;E9PNQ1;E9PN73;E9PI32	Dolichyl-diphosphooligosaccharide--protein glycosyltransferase subunit STT3A	STT3A	>sp|P46977|STT3A_HUMAN Dolichyl-diphosphooligosaccharide--protein glycosyltransferase subunit STT3A OS=Homo sapiens GN=STT3A PE=1 SV=2;>tr|E9PNQ1|E9PNQ1_HUMAN Dolichyl-diphosphooligosaccharide--protein glycosyltransferase subunit STT3A OS=Homo sapiens GN=S	12765000	13317000	1	9433400	12567000	11753000	17050000	12695000	18666000	9639500	1	10867000	15022000	12504000	11723000	8534600	18377000	17134000	11693000	11094000	13462000	18751000	13694000	14525000
P47914	60S ribosomal protein L29	RPL29	>sp|P47914|RL29_HUMAN 60S ribosomal protein L29 OS=Homo sapiens GN=RPL29 PE=1 SV=2	196400000	105880000	75167000	74607000	116010000	116200000	152270000	165190000	125910000	98676000	88208000	98527000	182780000	123140000	174440000	200810000	132440000	134210000	105030000	115020000	263470000	297810000	137880000	129950000
P48047;H7C0C1;H7C086;H7C068	ATP synthase subunit O, mitochondrial	ATP5O	>sp|P48047|ATPO_HUMAN ATP synthase subunit O, mitochondrial OS=Homo sapiens GN=ATP5O PE=1 SV=1	69238000	68583000	74379000	66756000	72893000	71423000	119520000	106480000	89678000	88620000	115990000	109440000	117800000	130390000	190310000	182040000	105330000	212650000	91843000	104260000	157360000	142560000	144960000	122760000
P48444;B0YIW6;P48444-2	Coatomer subunit delta	ARCN1	>sp|P48444|COPD_HUMAN Coatomer subunit delta OS=Homo sapiens GN=ARCN1 PE=1 SV=1;>tr|B0YIW6|B0YIW6_HUMAN Archain 1, isoform CRA_a OS=Homo sapiens GN=ARCN1 PE=4 SV=1;>sp|P48444-2|COPD_HUMAN Isoform 2 of Coatomer subunit delta OS=Homo sapiens GN=ARCN1	20385000	12032000	22057000	39887000	27935000	25044000	33978000	30100000	31371000	33524000	26866000	31753000	35096000	40425000	8797600	2651200	41337000	29909000	23610000	26055000	36024000	22297000	30333000	39872000
P48634-2;P48634-3;P48634;P48634-4	Protein PRRC2A	PRRC2A	>sp|P48634-2|PRC2A_HUMAN Isoform 2 of Protein PRRC2A OS=Homo sapiens GN=PRRC2A;>sp|P48634-3|PRC2A_HUMAN Isoform 3 of Protein PRRC2A OS=Homo sapiens GN=PRRC2A;>sp|P48634|PRC2A_HUMAN Protein PRRC2A OS=Homo sapiens GN=PRRC2A PE=1 SV=3;>sp|P48634-4|PRC2A_HUMAN	83151000	49839000	6148100	16888000	55838000	65846000	43788000	38431000	26781000	12317000	15756000	15706000	3217400	32642000	27892000	28902000	24783000	32127000	9173200	11668000	19586000	27111000	17606000	18624000
P48643;B7ZAR1;E9PCA1;E7ENZ3;P48643-2;H0Y914;D6RIZ7	T-complex protein 1 subunit epsilon	CCT5	>sp|P48643|TCPE_HUMAN T-complex protein 1 subunit epsilon OS=Homo sapiens GN=CCT5 PE=1 SV=1;>tr|B7ZAR1|B7ZAR1_HUMAN T-complex protein 1 subunit epsilon OS=Homo sapiens GN=CCT5 PE=2 SV=1;>tr|E9PCA1|E9PCA1_HUMAN T-complex protein 1 subunit epsilon OS=Homo sa	2371300000	2587700000	796720000	903260000	2313100000	2390200000	2572200000	2572100000	2423300000	2378500000	2288800000	2211400000	1666200000	1814700000	1328400000	1314800000	1472900000	1441900000	1904600000	1939000000	1836600000	1741600000	1858100000	1771100000
P48651;B4DE85;Q9BUQ5;J3KNR6	Phosphatidylserine synthase 1	PTDSS1	>sp|P48651|PTSS1_HUMAN Phosphatidylserine synthase 1 OS=Homo sapiens GN=PTDSS1 PE=1 SV=1;>tr|B4DE85|B4DE85_HUMAN Phosphatidylserine synthase 1 OS=Homo sapiens GN=PTDSS1 PE=2 SV=1;>tr|Q9BUQ5|Q9BUQ5_HUMAN PTDSS1 protein OS=Homo sapiens GN=PTDSS1 PE=2 SV=2	2479600	1	1	1	3017300	1	13958000	8480600	3989300	5817300	4519400	3832900	27612000	24450000	35540000	13191000	19817000	13383000	10338000	9333500	33476000	32877000	36208000	21664000
P48668;CON__P48668	Keratin, type II cytoskeletal 6C	KRT6C	>sp|P48668|K2C6C_HUMAN Keratin, type II cytoskeletal 6C OS=Homo sapiens GN=KRT6C PE=1 SV=3;>P48668 SWISS-PROT:P48668 Tax_Id=9606 Gene_Symbol=KRT6C Keratin, type II cytoskeletal 6C	1	1	70773000	76694000	1	7481000	1	1	1	1637400	3206900	15220000	1	1	1	1	49887000	29497000	1	694060	1	1	1	382410
P48739;B7Z7Q0;P48739-2;B3KYB6;B3KYB7	Phosphatidylinositol transfer protein beta isoform	PITPNB	>sp|P48739|PIPNB_HUMAN Phosphatidylinositol transfer protein beta isoform OS=Homo sapiens GN=PITPNB PE=1 SV=2;>tr|B7Z7Q0|B7Z7Q0_HUMAN Phosphatidylinositol transfer protein beta isoform OS=Homo sapiens GN=PITPNB PE=2 SV=1;>sp|P48739-2|PIPNB_HUMAN Isoform 2	5212300	6831800	15897000	13866000	6297700	1	7528100	12386000	9290500	15296000	6782000	9568000	6534800	1	1	8460100	20000000	15192000	6637100	4118100	1	1919500	7503200	7742000
P49006	MARCKS-related protein	MARCKSL1	>sp|P49006|MRP_HUMAN MARCKS-related protein OS=Homo sapiens GN=MARCKSL1 PE=1 SV=2	8086700	4469400	3570400	1381000	9152100	8187200	5476400	5035100	11386000	6091100	8110600	6804100	5946300	3165600	4098100	833050	8742400	6279400	5239700	2049400	3594700	5690200	4407900	1
P49207	60S ribosomal protein L34	RPL34	>sp|P49207|RL34_HUMAN 60S ribosomal protein L34 OS=Homo sapiens GN=RPL34 PE=1 SV=3	445380000	364360000	224270000	252560000	303440000	305790000	345930000	293800000	249510000	240680000	269360000	301680000	268280000	276470000	287150000	276080000	242120000	216320000	245030000	236840000	218140000	248970000	271750000	257690000
P49321;P49321-3;P49321-2;Q5T624;P49321-4;E9PRH9;H0YF33;H0YDS9;E9PI86;E9PPQ8;E9PPR5	Nuclear autoantigenic sperm protein	NASP	>sp|P49321|NASP_HUMAN Nuclear autoantigenic sperm protein OS=Homo sapiens GN=NASP PE=1 SV=2;>sp|P49321-3|NASP_HUMAN Isoform 3 of Nuclear autoantigenic sperm protein OS=Homo sapiens GN=NASP;>sp|P49321-2|NASP_HUMAN Isoform 2 of Nuclear autoantigenic sperm pr	67191000	71018000	128960000	118770000	91440000	83503000	66787000	74408000	86170000	82271000	64516000	91505000	39537000	46167000	47250000	57074000	62884000	54773000	56468000	36689000	47254000	43288000	60225000	59140000
P49327	Fatty acid synthase;[Acyl-carrier-protein] S-acetyltransferase;[Acyl-carrier-protein] S-malonyltransferase;3-oxoacyl-[acyl-carrier-protein] synthase;3-oxoacyl-[acyl-carrier-protein] reductase;3-hydroxyacyl-[acyl-carrier-protein] dehydratase;Enoyl-[acyl-carrier-protein] reductase;Oleoyl-[acyl-carrier-protein] hydrolase	FASN	>sp|P49327|FAS_HUMAN Fatty acid synthase OS=Homo sapiens GN=FASN PE=1 SV=3	85998000	172120000	564500000	589000000	246560000	247490000	197940000	233250000	286220000	303060000	242810000	249300000	201340000	222940000	89495000	156200000	284290000	369730000	159440000	144750000	167800000	147690000	216320000	228450000
P49354;E9PQP6;H0YE66;B3KVN2;P49354-2;H0YCW1;E9PPM9	Protein farnesyltransferase/geranylgeranyltransferase type-1 subunit alpha	FNTA	>sp|P49354|FNTA_HUMAN Protein farnesyltransferase/geranylgeranyltransferase type-1 subunit alpha OS=Homo sapiens GN=FNTA PE=1 SV=1;>tr|E9PQP6|E9PQP6_HUMAN Protein farnesyltransferase/geranylgeranyltransferase type-1 subunit alpha (Fragment) OS=Homo sapiens	481120	1515300	679480	1	132830	1129100	502320000	581070000	333740000	315890000	505410000	461700000	482440000	564710000	477810000	438050000	441020000	433410000	500580000	495220000	551800000	560120000	603290000	397190000
P49356;P49356-2;B4DL54;H0YHI0	Protein farnesyltransferase subunit beta	FNTB;CHURC1-FNTB	>sp|P49356|FNTB_HUMAN Protein farnesyltransferase subunit beta OS=Homo sapiens GN=FNTB PE=1 SV=1;>sp|P49356-2|FNTB_HUMAN Isoform 2 of Protein farnesyltransferase subunit beta OS=Homo sapiens GN=FNTB;>tr|B4DL54|B4DL54_HUMAN Protein farnesyltransferase subun	1	4836400	17736000	43846000	1779300	1	515240000	731810000	355710000	344890000	342100000	326170000	430420000	489670000	505980000	474510000	405310000	401790000	393340000	423570000	785050000	627430000	627160000	531550000
P49368;P49368-2;B4DUR8;E9PRC8;Q5SZX6;Q5SZW8;Q5SZX9;E9PM09;E9PQ35	T-complex protein 1 subunit gamma	CCT3	>sp|P49368|TCPG_HUMAN T-complex protein 1 subunit gamma OS=Homo sapiens GN=CCT3 PE=1 SV=4;>sp|P49368-2|TCPG_HUMAN Isoform 2 of T-complex protein 1 subunit gamma OS=Homo sapiens GN=CCT3;>tr|B4DUR8|B4DUR8_HUMAN T-complex protein 1 subunit gamma OS=Homo sapie	661620000	650080000	883860000	713390000	797300000	776270000	721530000	764490000	731700000	683680000	775360000	694560000	749960000	816280000	801550000	821400000	997930000	925750000	554410000	637530000	728050000	734010000	719760000	756700000
P49411;H3BNU3	Elongation factor Tu, mitochondrial	TUFM	>sp|P49411|EFTU_HUMAN Elongation factor Tu, mitochondrial OS=Homo sapiens GN=TUFM PE=1 SV=2	452320000	528180000	250820000	267540000	477380000	520340000	435960000	402380000	493050000	392110000	364720000	366950000	293450000	308040000	319570000	327430000	295870000	339950000	314080000	283090000	422400000	340200000	399460000	355650000
P49458;E9PE20;P49458-2	Signal recognition particle 9 kDa protein	SRP9	>sp|P49458|SRP09_HUMAN Signal recognition particle 9 kDa protein OS=Homo sapiens GN=SRP9 PE=1 SV=2;>tr|E9PE20|E9PE20_HUMAN Signal recognition particle 9 kDa protein OS=Homo sapiens GN=SRP9 PE=4 SV=1;>sp|P49458-2|SRP09_HUMAN Isoform 2 of Signal recognition	6389300	53470000	32895000	34812000	46789000	35734000	36813000	36393000	31545000	38294000	36680000	81317000	40086000	51142000	43931000	51128000	55364000	47422000	36099000	53728000	39680000	39121000	52327000	61726000
P49588;H3BPK7	Alanine--tRNA ligase, cytoplasmic	AARS	>sp|P49588|SYAC_HUMAN Alanine--tRNA ligase, cytoplasmic OS=Homo sapiens GN=AARS PE=1 SV=2	1	5116400	7588400	6879600	6575800	6583100	4528700	4643800	11662000	18290000	1	6014600	5892200	4699700	4485100	4948400	8556700	3511000	5034500	4734600	5119900	3341800	3720700	4090300
P49591;Q5T5C7	Serine--tRNA ligase, cytoplasmic	SARS	>sp|P49591|SYSC_HUMAN Serine--tRNA ligase, cytoplasmic OS=Homo sapiens GN=SARS PE=1 SV=3;>tr|Q5T5C7|Q5T5C7_HUMAN Serine--tRNA ligase, cytoplasmic OS=Homo sapiens GN=SARS PE=2 SV=1	4200600	3071700	14411000	17972000	4770700	6223800	4157400	4918700	5667300	4563900	4111400	8183800	4326900	4805700	3658500	1	9602500	5587700	3270500	1	2384100	1	5522200	8251000
P49755;G3V2K7	Transmembrane emp24 domain-containing protein 10	TMED10	>sp|P49755|TMEDA_HUMAN Transmembrane emp24 domain-containing protein 10 OS=Homo sapiens GN=TMED10 PE=1 SV=2	36560000	61618000	30027000	30001000	35177000	41491000	95680000	80889000	79978000	85155000	69770000	61544000	71511000	80246000	78788000	79608000	75299000	80126000	57411000	56704000	63233000	72293000	63756000	68437000
P49756;P49756-2;P49756-3;E9PQU5;H0YE46	RNA-binding protein 25	RBM25	>sp|P49756|RBM25_HUMAN RNA-binding protein 25 OS=Homo sapiens GN=RBM25 PE=1 SV=3;>sp|P49756-2|RBM25_HUMAN Isoform 2 of RNA-binding protein 25 OS=Homo sapiens GN=RBM25;>sp|P49756-3|RBM25_HUMAN Isoform 3 of RNA-binding protein 25 OS=Homo sapiens GN=RBM25;>tr	20578000	29925000	16428000	9820400	34507000	28577000	29332000	33809000	28390000	31591000	29249000	25795000	19496000	19646000	19171000	17523000	6198000	7554700	31409000	16639000	18698000	20075000	15688000	20357000
P49770;H0YJJ8;G3V5E5;H0YK01	Translation initiation factor eIF-2B subunit beta	EIF2B2	>sp|P49770|EI2BB_HUMAN Translation initiation factor eIF-2B subunit beta OS=Homo sapiens GN=EIF2B2 PE=1 SV=3;>tr|H0YJJ8|H0YJJ8_HUMAN Translation initiation factor eIF-2B subunit beta (Fragment) OS=Homo sapiens GN=EIF2B2 PE=2 SV=1;>tr|G3V5E5|G3V5E5_HUMAN Tr	6919800	8480500	11164000	1	6973500	8157700	20662000	40485000	12840000	14021000	13153000	19969000	65414000	134810000	78940000	50285000	116000000	85556000	20686000	17506000	28656000	23077000	12427000	22898000
P49773;D6RC06;D6REP8;D6RE99;D6RD60	Histidine triad nucleotide-binding protein 1	HINT1	>sp|P49773|HINT1_HUMAN Histidine triad nucleotide-binding protein 1 OS=Homo sapiens GN=HINT1 PE=1 SV=2;>tr|D6RC06|D6RC06_HUMAN Histidine triad nucleotide-binding protein 1 OS=Homo sapiens GN=HINT1 PE=4 SV=1;>tr|D6REP8|D6REP8_HUMAN Histidine triad nucleotid	26316000	17457000	61246000	75251000	26824000	21259000	16344000	20954000	61280000	53682000	53353000	41652000	23830000	17980000	19348000	22435000	59888000	16192000	12911000	9350300	12763000	20585000	10648000	15878000
P49821-2;G3V0I5;P49821;E9PQP1;E9PPS5;E9PMX3;B4DE93;E9PJL9;H0YE81;E9PLC6;E9PPR0	NADH dehydrogenase [ubiquinone] flavoprotein 1, mitochondrial	NDUFV1	>sp|P49821-2|NDUV1_HUMAN Isoform 2 of NADH dehydrogenase [ubiquinone] flavoprotein 1, mitochondrial OS=Homo sapiens GN=NDUFV1;>tr|G3V0I5|G3V0I5_HUMAN NADH dehydrogenase (Ubiquinone) flavoprotein 1, 51kDa, isoform CRA_c OS=Homo sapiens GN=NDUFV1 PE=4 SV=1;>	1	1	6265700	5878000	6502500	1	7670400	1	1	1	1	1	1	6312300	1	1	4427200	7515800	8188900	1	1	1	4863800	3188100
P49915-2;P49915	GMP synthase [glutamine-hydrolyzing]	GMPS	>sp|P49915-2|GUAA_HUMAN Isoform 2 of GMP synthase [glutamine-hydrolyzing] OS=Homo sapiens GN=GMPS;>sp|P49915|GUAA_HUMAN GMP synthase [glutamine-hydrolyzing] OS=Homo sapiens GN=GMPS PE=1 SV=1	2844500	3383400	1	4468000	3338800	3563200	3349100	3562500	5918200	4736900	3808300	3827000	1	3103500	1	1	2633100	1	1	2447300	1	1	1	1
P49916-2;P49916;K7ENR9;K7ERZ5	DNA ligase 3	LIG3	>sp|P49916-2|DNLI3_HUMAN Isoform Beta of DNA ligase 3 OS=Homo sapiens GN=LIG3;>sp|P49916|DNLI3_HUMAN DNA ligase 3 OS=Homo sapiens GN=LIG3 PE=1 SV=2	789440000	847000000	1	1	634700000	1	824860000	821850000	937560000	1169200000	820040000	976660000	1	1	1	1	1	1	5123300000	1714500000	1	1	1	1
P50395;E7EU23;P50395-2;Q5SX87;V9GYJ7;V9GYF8;Q5SX90;Q5SX86;P31150;G5E9U5;Q5SX91	Rab GDP dissociation inhibitor beta	GDI2	>sp|P50395|GDIB_HUMAN Rab GDP dissociation inhibitor beta OS=Homo sapiens GN=GDI2 PE=1 SV=2;>tr|E7EU23|E7EU23_HUMAN Rab GDP dissociation inhibitor beta OS=Homo sapiens GN=GDI2 PE=2 SV=1;>sp|P50395-2|GDIB_HUMAN Isoform 2 of Rab GDP dissociation inhibitor be	55645000	56474000	211270000	105660000	133660000	88546000	121440000	71751000	164870000	151040000	113520000	100260000	84209000	99519000	61793000	34004000	126220000	128740000	63201000	56544000	73480000	72082000	115090000	91177000
P50402;Q5HY57	Emerin	EMD	>sp|P50402|EMD_HUMAN Emerin OS=Homo sapiens GN=EMD PE=1 SV=1;>tr|Q5HY57|Q5HY57_HUMAN Emerin OS=Homo sapiens GN=EMD PE=4 SV=1	63968000	67511000	13208000	33318000	53927000	48966000	257570000	218200000	122420000	118420000	114390000	136190000	272810000	321510000	292440000	298440000	213020000	238270000	283880000	268610000	354500000	316050000	258020000	261280000
P50454;E9PKH2;E9PR70;E9PPV6;H0YEP8;E9PQ34;E9PJH8;E9PIG2;E9PRS3;E9PNX1;E9PK86;E9PMI5	Serpin H1	SERPINH1	>sp|P50454|SERPH_HUMAN Serpin H1 OS=Homo sapiens GN=SERPINH1 PE=1 SV=2;>tr|E9PKH2|E9PKH2_HUMAN Serpin H1 OS=Homo sapiens GN=SERPINH1 PE=2 SV=1;>tr|E9PR70|E9PR70_HUMAN Serpin H1 (Fragment) OS=Homo sapiens GN=SERPINH1 PE=2 SV=1;>tr|E9PPV6|E9PPV6_HUMAN Serpin	8606300	1	11693000	31340000	11501000	10235000	9044600	10587000	10218000	8753900	9981000	10554000	8281300	10992000	1	10540000	13333000	1	5537200	1	13502000	1	10627000	5552600
P50502;Q8NFI4;H7C3I1;Q8IZP2;F6VDH7;F8WAQ7	Hsc70-interacting protein;Putative protein FAM10A5;Putative protein FAM10A4	ST13;ST13P5;ST13P4	>sp|P50502|F10A1_HUMAN Hsc70-interacting protein OS=Homo sapiens GN=ST13 PE=1 SV=2;>sp|Q8NFI4|F10A5_HUMAN Putative protein FAM10A5 OS=Homo sapiens GN=ST13P5 PE=5 SV=1;>tr|H7C3I1|H7C3I1_HUMAN Hsc70-interacting protein (Fragment) OS=Homo sapiens GN=ST13 PE=4	56441000	62237000	171140000	127560000	80929000	77272000	150630000	109630000	146230000	157850000	126560000	118350000	127680000	135730000	143070000	120380000	159970000	147040000	70092000	79182000	78073000	87334000	102230000	92754000
P50750;P50750-2	Cyclin-dependent kinase 9	CDK9	>sp|P50750|CDK9_HUMAN Cyclin-dependent kinase 9 OS=Homo sapiens GN=CDK9 PE=1 SV=3;>sp|P50750-2|CDK9_HUMAN Isoform 2 of Cyclin-dependent kinase 9 OS=Homo sapiens GN=CDK9	18787000	21601000	1	1	21504000	19740000	9252300	12472000	8505600	8130200	5873900	1	1	6054600	3652100	3844400	1	6547200	5384500	9904100	4693000	1499300	1	1
P50914;E7EPB3	60S ribosomal protein L14	RPL14	>sp|P50914|RL14_HUMAN 60S ribosomal protein L14 OS=Homo sapiens GN=RPL14 PE=1 SV=4;>tr|E7EPB3|E7EPB3_HUMAN 60S ribosomal protein L14 OS=Homo sapiens GN=RPL14 PE=4 SV=1	250420000	286340000	42223000	5967600	317050000	295220000	315190000	373040000	261450000	247460000	326960000	265420000	422480000	377910000	412850000	455510000	440660000	428050000	160390000	273930000	565000000	512220000	317110000	369620000
P50990;P50990-2;P50990-3;H7C4C8;H7C2U0	T-complex protein 1 subunit theta	CCT8	>sp|P50990|TCPQ_HUMAN T-complex protein 1 subunit theta OS=Homo sapiens GN=CCT8 PE=1 SV=4;>sp|P50990-2|TCPQ_HUMAN Isoform 2 of T-complex protein 1 subunit theta OS=Homo sapiens GN=CCT8;>sp|P50990-3|TCPQ_HUMAN Isoform 3 of T-complex protein 1 subunit theta	774070000	907970000	741450000	612860000	949420000	976260000	753540000	720940000	766520000	750340000	766040000	774380000	609780000	671040000	505690000	523940000	706330000	756030000	537150000	491730000	560560000	577970000	599520000	624350000
P50991;B7Z9L0;P50991-2;B7Z2F4	T-complex protein 1 subunit delta	CCT4	>sp|P50991|TCPD_HUMAN T-complex protein 1 subunit delta OS=Homo sapiens GN=CCT4 PE=1 SV=4;>tr|B7Z9L0|B7Z9L0_HUMAN T-complex protein 1 subunit delta OS=Homo sapiens GN=CCT4 PE=2 SV=1;>sp|P50991-2|TCPD_HUMAN Isoform 2 of T-complex protein 1 subunit delta OS=	433930000	451440000	525590000	514800000	468180000	507110000	457730000	491410000	474210000	477310000	478520000	455330000	404330000	437230000	439700000	426710000	470170000	446680000	327430000	341890000	416660000	451690000	405860000	393550000
P51116	Fragile X mental retardation syndrome-related protein 2	FXR2	>sp|P51116|FXR2_HUMAN Fragile X mental retardation syndrome-related protein 2 OS=Homo sapiens GN=FXR2 PE=1 SV=2	14359000	32631000	1	1	15130000	10168000	6925800	8037900	7271300	6757500	8023900	5707100	4606800	7777800	1	1	6515700	8755300	1	7808000	1	1	4147800	1
P51148;P51148-2;K7ERI8;K7ERQ8;F8VVZ0;F8VUA5;F8VVK3;K7ENY4;B4DJA5;P20339;F8VWU4;K7EIP6;F8WCY6;F8WD79;F8VPW9;F8VSF8;F8VWZ7	Ras-related protein Rab-5C;Ras-related protein Rab-5A	RAB5C;RAB5B;RAB5A	>sp|P51148|RAB5C_HUMAN Ras-related protein Rab-5C OS=Homo sapiens GN=RAB5C PE=1 SV=2;>sp|P51148-2|RAB5C_HUMAN Isoform 2 of Ras-related protein Rab-5C OS=Homo sapiens GN=RAB5C;>tr|K7ERI8|K7ERI8_HUMAN Uncharacterized protein OS=Homo sapiens PE=3 SV=1;>tr|K7E	17872000	16003000	1	44176000	23863000	25368000	42186000	42368000	36524000	35404000	43357000	37314000	43251000	55739000	68915000	55308000	52450000	62295000	23615000	22413000	39481000	36985000	42369000	42913000
P51149;C9J592;C9J8S3;C9IZZ0;C9J4V0;C9J4S4;C9J7D1	Ras-related protein Rab-7a	RAB7A	>sp|P51149|RAB7A_HUMAN Ras-related protein Rab-7a OS=Homo sapiens GN=RAB7A PE=1 SV=1;>tr|C9J592|C9J592_HUMAN Ras-related protein Rab-7a (Fragment) OS=Homo sapiens GN=RAB7A PE=2 SV=1;>tr|C9J8S3|C9J8S3_HUMAN Ras-related protein Rab-7a OS=Homo sapiens GN=RAB7	20349000	16546000	83200000	46038000	42077000	22575000	63177000	78547000	70102000	72208000	70408000	66869000	69707000	66479000	80890000	82476000	99344000	110060000	67406000	40404000	55346000	45539000	87835000	62722000
P51153	Ras-related protein Rab-13	RAB13	>sp|P51153|RAB13_HUMAN Ras-related protein Rab-13 OS=Homo sapiens GN=RAB13 PE=1 SV=1	1	14501000	1	1	32781000	1	23978000	19565000	250930000	20605000	1	34700000	334680000	24774000	26318000	16236000	16903000	16002000	21080000	1	17263000	19528000	45217000	44666000
P51571;A6NLM8	Translocon-associated protein subunit delta	SSR4	>sp|P51571|SSRD_HUMAN Translocon-associated protein subunit delta OS=Homo sapiens GN=SSR4 PE=1 SV=1;>tr|A6NLM8|A6NLM8_HUMAN Translocon-associated protein subunit delta OS=Homo sapiens GN=SSR4 PE=2 SV=1	27787000	1	33797000	9731200	47784000	18969000	66329000	104350000	77219000	94973000	95499000	97707000	98927000	124790000	146170000	227450000	112050000	205730000	57512000	57639000	107280000	77814000	96280000	153460000
P51572;P51572-2;C9JSP1;C9JQ75;C9J0M4;C9JMD7;C9JM14	B-cell receptor-associated protein 31	BCAP31	>sp|P51572|BAP31_HUMAN B-cell receptor-associated protein 31 OS=Homo sapiens GN=BCAP31 PE=1 SV=3;>sp|P51572-2|BAP31_HUMAN Isoform 2 of B-cell receptor-associated protein 31 OS=Homo sapiens GN=BCAP31;>tr|C9JSP1|C9JSP1_HUMAN B-cell receptor-associated protei	89361000	76090000	30156000	62379000	84370000	65454000	122290000	97566000	117990000	116150000	91785000	106370000	154650000	138820000	115410000	196210000	121960000	168600000	170560000	135130000	105770000	84993000	177200000	202090000
P51665;B4DXI8;H3BNT7;H3BTM8;H3BQV2	26S proteasome non-ATPase regulatory subunit 7	PSMD7	>sp|P51665|PSMD7_HUMAN 26S proteasome non-ATPase regulatory subunit 7 OS=Homo sapiens GN=PSMD7 PE=1 SV=2;>tr|B4DXI8|B4DXI8_HUMAN 26S proteasome non-ATPase regulatory subunit 7 OS=Homo sapiens GN=PSMD7 PE=2 SV=1;>tr|H3BNT7|H3BNT7_HUMAN 26S proteasome non-AT	106820000	126900000	112510000	72786000	132650000	95534000	149260000	176690000	124600000	135880000	150350000	132780000	90717000	116960000	102920000	136370000	130180000	116530000	120810000	73980000	195910000	166520000	129780000	142470000
P51809-3;P51809;P51809-2	Vesicle-associated membrane protein 7	VAMP7	>sp|P51809-3|VAMP7_HUMAN Isoform 3 of Vesicle-associated membrane protein 7 OS=Homo sapiens GN=VAMP7;>sp|P51809|VAMP7_HUMAN Vesicle-associated membrane protein 7 OS=Homo sapiens GN=VAMP7 PE=1 SV=3;>sp|P51809-2|VAMP7_HUMAN Isoform 2 of Vesicle-associated me	1	1	1	1	1	1	9066800	9412100	6179200	9005900	1	6096700	8026700	10930000	6648900	10606000	12190000	9722400	4315400	6651400	10142000	1	1	1
P51858;A8K8G0;P51858-2;P51858-3	Hepatoma-derived growth factor	HDGF	>sp|P51858|HDGF_HUMAN Hepatoma-derived growth factor OS=Homo sapiens GN=HDGF PE=1 SV=1;>tr|A8K8G0|A8K8G0_HUMAN Hepatoma-derived growth factor OS=Homo sapiens GN=HDGF PE=2 SV=1;>sp|P51858-2|HDGF_HUMAN Isoform 2 of Hepatoma-derived growth factor OS=Homo sapi	1	8563700	23936000	20056000	11453000	1	7590200	8615000	10522000	13327000	11689000	9685400	9649600	5601900	1	1	14889000	9308800	14930000	1	1	1	9995200	11268000
P51991	Heterogeneous nuclear ribonucleoprotein A3	HNRNPA3	>sp|P51991|ROA3_HUMAN Heterogeneous nuclear ribonucleoprotein A3 OS=Homo sapiens GN=HNRNPA3 PE=1 SV=2	373560000	403450000	126130000	165130000	354430000	385580000	191440000	224220000	191780000	240260000	221300000	201600000	150400000	141550000	241230000	279180000	134470000	164970000	237620000	303660000	317050000	332880000	211660000	201040000
P52272-2;P52272;M0R2T0;M0R019;M0R2I7;M0QYQ7;M0R0N3;M0QY96;M0R0Y6	Heterogeneous nuclear ribonucleoprotein M	HNRNPM	>sp|P52272-2|HNRPM_HUMAN Isoform 2 of Heterogeneous nuclear ribonucleoprotein M OS=Homo sapiens GN=HNRNPM;>sp|P52272|HNRPM_HUMAN Heterogeneous nuclear ribonucleoprotein M OS=Homo sapiens GN=HNRNPM PE=1 SV=3	787730000	742480000	222360000	250360000	602780000	708640000	732850000	610150000	509480000	531620000	574940000	578410000	518510000	525270000	518930000	418490000	555880000	481010000	616070000	655010000	440840000	409840000	483380000	542050000
P52292;J3QLL0;J3KS65;J3QL07	Importin subunit alpha-1	KPNA2	>sp|P52292|IMA1_HUMAN Importin subunit alpha-1 OS=Homo sapiens GN=KPNA2 PE=1 SV=1;>tr|J3QLL0|J3QLL0_HUMAN Importin subunit alpha-1 (Fragment) OS=Homo sapiens GN=KPNA2 PE=2 SV=1;>tr|J3KS65|J3KS65_HUMAN Importin subunit alpha-1 (Fragment) OS=Homo sapiens GN=	54720000	30817000	18575000	62195000	51180000	60844000	203430000	190550000	121370000	123990000	137980000	155470000	342860000	447360000	574030000	618530000	440390000	497900000	189880000	246690000	363690000	344020000	230240000	254830000
P52306;P52306-2;H0Y8M2;D6RHH8;D6RB97;D6RBC6;D6RHZ7;D6RC12	Rap1 GTPase-GDP dissociation stimulator 1	RAP1GDS1	>sp|P52306|GDS1_HUMAN Rap1 GTPase-GDP dissociation stimulator 1 OS=Homo sapiens GN=RAP1GDS1 PE=1 SV=3;>sp|P52306-2|GDS1_HUMAN Isoform 2 of Rap1 GTPase-GDP dissociation stimulator 1 OS=Homo sapiens GN=RAP1GDS1	1002300	1671200	1	1	782440	940560	67071000	50601000	18192000	43401000	69392000	24038000	585020000	282440000	313740000	168430000	213720000	160870000	260860000	257990000	301470000	287530000	284510000	271610000
P52306-4	Rap1 GTPase-GDP dissociation stimulator 1	RAP1GDS1	>sp|P52306-4|GDS1_HUMAN Isoform 4 of Rap1 GTPase-GDP dissociation stimulator 1 OS=Homo sapiens GN=RAP1GDS1	255560	1	1	11788000	6359700	15342000	367570000	315410000	286530000	294800000	425650000	414270000	2654700000	2767800000	2975500000	2814300000	2407200000	2468200000	1826500000	1919000000	2775800000	2813500000	2782300000	2599100000
P52306-5;P52306-6;P52306-3;D6REZ0;D6RC85	Rap1 GTPase-GDP dissociation stimulator 1	RAP1GDS1	>sp|P52306-5|GDS1_HUMAN Isoform 5 of Rap1 GTPase-GDP dissociation stimulator 1 OS=Homo sapiens GN=RAP1GDS1;>sp|P52306-6|GDS1_HUMAN Isoform 6 of Rap1 GTPase-GDP dissociation stimulator 1 OS=Homo sapiens GN=RAP1GDS1;>sp|P52306-3|GDS1_HUMAN Isoform 3 of Rap1	1	1	1	1	1	1	1	2343800	5859300	3775500	1	1	16912000	1	45431000	48650000	25667000	19740000	13365000	19481000	36868000	44679000	27453000	28689000
P52597	Heterogeneous nuclear ribonucleoprotein F;Heterogeneous nuclear ribonucleoprotein F, N-terminally processed	HNRNPF	>sp|P52597|HNRPF_HUMAN Heterogeneous nuclear ribonucleoprotein F OS=Homo sapiens GN=HNRNPF PE=1 SV=3	122450000	147090000	81321000	77029000	150730000	159910000	139540000	134920000	137930000	145620000	148280000	121900000	116650000	116960000	95963000	79821000	119620000	135990000	154460000	118140000	79017000	105700000	134060000	157010000
P52732	Kinesin-like protein KIF11	KIF11	>sp|P52732|KIF11_HUMAN Kinesin-like protein KIF11 OS=Homo sapiens GN=KIF11 PE=1 SV=2	7904500000	8216600000	960430000	929320000	7117900000	7265500000	3365900000	3430100000	2644300000	2769100000	2369300000	2448600000	1369400000	1380300000	1202000000	1127600000	1202400000	1199900000	1775900000	1726600000	1999000000	2091300000	1722800000	1705500000
P52756;C9JFQ5;P52756-4;P52756-2;P52756-5;C9J9P7;F8WE23;C9JR02;P52756-3;F8W910	RNA-binding protein 5	RBM5	>sp|P52756|RBM5_HUMAN RNA-binding protein 5 OS=Homo sapiens GN=RBM5 PE=1 SV=2	128410000	118890000	16969000	14483000	119400000	122950000	71778000	64581000	68125000	74319000	57242000	64243000	37197000	28615000	17493000	17541000	13154000	23283000	34550000	64338000	49963000	42110000	59204000	41414000
P52907	F-actin-capping protein subunit alpha-1	CAPZA1	>sp|P52907|CAZA1_HUMAN F-actin-capping protein subunit alpha-1 OS=Homo sapiens GN=CAPZA1 PE=1 SV=3	103550000	126440000	59367000	78987000	105760000	109920000	40678000	60026000	58332000	68336000	75899000	59635000	31169000	38041000	40944000	49523000	38747000	32588000	39989000	44836000	57614000	46710000	12400000	45320000
P53007;B4DP62	Tricarboxylate transport protein, mitochondrial	SLC25A1	>sp|P53007|TXTP_HUMAN Tricarboxylate transport protein, mitochondrial OS=Homo sapiens GN=SLC25A1 PE=1 SV=2;>tr|B4DP62|B4DP62_HUMAN Solute carrier family 25 (Mitochondrial carrier; citrate transporter), member 1, isoform CRA_b OS=Homo sapiens GN=SLC25A1 PE=	30581000	3696200	11675000	14334000	17422000	18246000	54879000	45560000	45461000	25062000	26042000	26475000	124970000	125130000	94077000	65639000	115580000	97081000	63133000	108980000	146510000	1	148450000	143050000
P53396-2;P53396;B4E3P0;K7ESG8	ATP-citrate synthase	ACLY	>sp|P53396-2|ACLY_HUMAN Isoform 2 of ATP-citrate synthase OS=Homo sapiens GN=ACLY;>sp|P53396|ACLY_HUMAN ATP-citrate synthase OS=Homo sapiens GN=ACLY PE=1 SV=3;>tr|B4E3P0|B4E3P0_HUMAN ATP-citrate synthase OS=Homo sapiens GN=ACLY PE=2 SV=1	10357000	14231000	87146000	42778000	24503000	28871000	16040000	19745000	39058000	41593000	28579000	30854000	17704000	17215000	20321000	14458000	49464000	40877000	21961000	18226000	19563000	13099000	19387000	26878000
P53618;E9PP73	Coatomer subunit beta	COPB1	>sp|P53618|COPB_HUMAN Coatomer subunit beta OS=Homo sapiens GN=COPB1 PE=1 SV=3;>tr|E9PP73|E9PP73_HUMAN Coatomer subunit beta (Fragment) OS=Homo sapiens GN=COPB1 PE=2 SV=2	14778000	17139000	24436000	29234000	5083100	7127900	8710700	16019000	7743800	20181000	16500000	12998000	29255000	22380000	17158000	17016000	36505000	26920000	15416000	15970000	40305000	20485000	16816000	17665000
P53621;P53621-2	Coatomer subunit alpha;Xenin;Proxenin	COPA	>sp|P53621|COPA_HUMAN Coatomer subunit alpha OS=Homo sapiens GN=COPA PE=1 SV=2;>sp|P53621-2|COPA_HUMAN Isoform 2 of Coatomer subunit alpha OS=Homo sapiens GN=COPA	41407000	33893000	98289000	97048000	43892000	47896000	46059000	65552000	43672000	80596000	84138000	61990000	74997000	73955000	52125000	37654000	58459000	79326000	54541000	55664000	51797000	46009000	55285000	64208000
P53985;Q5T8R3;Q49A45;Q5T8R5	Monocarboxylate transporter 1	SLC16A1	>sp|P53985|MOT1_HUMAN Monocarboxylate transporter 1 OS=Homo sapiens GN=SLC16A1 PE=1 SV=3	54189000	44591000	31715000	32622000	41026000	38279000	124400000	115590000	67557000	88745000	96699000	107990000	183840000	234240000	216120000	181720000	179980000	188160000	204440000	172140000	241780000	212720000	118110000	135090000
P53999	Activated RNA polymerase II transcriptional coactivator p15	SUB1	>sp|P53999|TCP4_HUMAN Activated RNA polymerase II transcriptional coactivator p15 OS=Homo sapiens GN=SUB1 PE=1 SV=3	102200000	137670000	89210000	47656000	115320000	117280000	60409000	52150000	84636000	48583000	71355000	62464000	62685000	43439000	38829000	51164000	41185000	35744000	56663000	49551000	30780000	36247000	54048000	49744000
P54105;E9PMI6;J3KN38;E9PJF4;E9PQ83	Methylosome subunit pICln	CLNS1A	>sp|P54105|ICLN_HUMAN Methylosome subunit pICln OS=Homo sapiens GN=CLNS1A PE=1 SV=1;>tr|E9PMI6|E9PMI6_HUMAN Methylosome subunit pICln OS=Homo sapiens GN=CLNS1A PE=2 SV=1;>tr|J3KN38|J3KN38_HUMAN Methylosome subunit pICln OS=Homo sapiens GN=CLNS1A PE=2 SV=1;	1756600000	1851900000	528810000	647950000	1841300000	1642600000	723610000	746300000	841130000	909080000	635150000	594780000	335980000	401120000	532530000	553410000	402310000	341930000	252640000	421810000	676690000	616020000	550280000	512010000
P54136;P54136-2;F5H3T8;E5RH09;E5RJM9	Arginine--tRNA ligase, cytoplasmic	RARS	>sp|P54136|SYRC_HUMAN Arginine--tRNA ligase, cytoplasmic OS=Homo sapiens GN=RARS PE=1 SV=2;>sp|P54136-2|SYRC_HUMAN Isoform Monomeric of Arginine--tRNA ligase, cytoplasmic OS=Homo sapiens GN=RARS;>tr|F5H3T8|F5H3T8_HUMAN Arginine--tRNA ligase, cytoplasmic OS	69244000	62622000	116210000	127700000	109410000	94095000	144700000	165400000	127420000	161500000	146660000	139220000	142950000	158610000	125600000	151940000	185250000	169320000	135730000	110480000	138650000	116470000	133320000	126570000
P54577	Tyrosine--tRNA ligase, cytoplasmic;Tyrosine--tRNA ligase, cytoplasmic, N-terminally processed	YARS	>sp|P54577|SYYC_HUMAN Tyrosine--tRNA ligase, cytoplasmic OS=Homo sapiens GN=YARS PE=1 SV=4	31990000	28390000	43127000	65833000	63081000	55869000	42693000	46624000	77810000	66058000	36507000	49931000	28260000	39529000	21507000	27425000	58656000	40008000	24419000	26871000	33331000	33847000	28138000	34909000
P54709;H7C547;F8WBY4;C9JA36;B7Z1N7;H7C4L9;C9JXZ1	Sodium/potassium-transporting ATPase subunit beta-3	ATP1B3	>sp|P54709|AT1B3_HUMAN Sodium/potassium-transporting ATPase subunit beta-3 OS=Homo sapiens GN=ATP1B3 PE=1 SV=1;>tr|H7C547|H7C547_HUMAN Sodium/potassium-transporting ATPase subunit beta-3 (Fragment) OS=Homo sapiens GN=ATP1B3 PE=3 SV=1;>tr|F8WBY4|F8WBY4_HUMA	1	1	1	11158000	5681700	7148100	10088000	6049900	10291000	18941000	15017000	11896000	13796000	14893000	14339000	11648000	20323000	20165000	6354900	10046000	12178000	21109000	16749000	17297000
P54727;Q5W0S5;Q5W0S4;K7ENJ0;K7ELW1;P54725-2;P54727-2;P54725-3;P54725	UV excision repair protein RAD23 homolog B	RAD23B	>sp|P54727|RD23B_HUMAN UV excision repair protein RAD23 homolog B OS=Homo sapiens GN=RAD23B PE=1 SV=1;>tr|Q5W0S5|Q5W0S5_HUMAN UV excision repair protein RAD23 homolog B (Fragment) OS=Homo sapiens GN=RAD23B PE=2 SV=1;>tr|Q5W0S4|Q5W0S4_HUMAN UV excision repa	16369000	16311000	39369000	21216000	27367000	29298000	42663000	30184000	40130000	58368000	19653000	17952000	31151000	21325000	8858700	1	21337000	35266000	41303000	30612000	19282000	1	16447000	18082000
P54819-5;P54819-2;F8W1A4;P54819;G3V213;F8VZG5;P54819-6;P54819-3;P54819-4;F8VY04;F8VPP1	Adenylate kinase 2, mitochondrial;Adenylate kinase 2, mitochondrial, N-terminally processed	AK2	>sp|P54819-5|KAD2_HUMAN Isoform 5 of Adenylate kinase 2, mitochondrial OS=Homo sapiens GN=AK2;>sp|P54819-2|KAD2_HUMAN Isoform 2 of Adenylate kinase 2, mitochondrial OS=Homo sapiens GN=AK2;>tr|F8W1A4|F8W1A4_HUMAN Adenylate kinase 2, mitochondrial OS=Homo sa	8867600	1	8240000	17491000	7755700	7426300	10431000	1	16402000	7809600	7549000	8304900	7425900	5521600	8837600	1	20412000	29065000	1	7106600	1	1	6924400	6586300
P54886-2;P54886	Delta-1-pyrroline-5-carboxylate synthase;Glutamate 5-kinase;Gamma-glutamyl phosphate reductase	ALDH18A1	>sp|P54886-2|P5CS_HUMAN Isoform Short of Delta-1-pyrroline-5-carboxylate synthase OS=Homo sapiens GN=ALDH18A1;>sp|P54886|P5CS_HUMAN Delta-1-pyrroline-5-carboxylate synthase OS=Homo sapiens GN=ALDH18A1 PE=1 SV=2	16148000	18559000	17163000	30125000	24684000	34674000	24250000	24128000	55050000	35434000	42689000	30275000	37663000	17533000	18140000	16527000	40171000	25309000	27000000	13724000	10684000	14739000	12588000	17215000
P55010;H0YLZ1;H0YN40;H0YMJ8;H0YM54;H0YK11;H0YK29	Eukaryotic translation initiation factor 5	EIF5	>sp|P55010|IF5_HUMAN Eukaryotic translation initiation factor 5 OS=Homo sapiens GN=EIF5 PE=1 SV=2;>tr|H0YLZ1|H0YLZ1_HUMAN Eukaryotic translation initiation factor 5 (Fragment) OS=Homo sapiens GN=EIF5 PE=2 SV=1;>tr|H0YN40|H0YN40_HUMAN Eukaryotic translation	55531000	27449000	104150000	93478000	75098000	56970000	213660000	246020000	145300000	137270000	169800000	154240000	317030000	333570000	272640000	322740000	378790000	307630000	208290000	255780000	257630000	217580000	282840000	266770000
P55036;Q5VWC4;P55036-2;A6PVX3;H0Y3Y9;A2A3N6;H0Y561	26S proteasome non-ATPase regulatory subunit 4	PSMD4	>sp|P55036|PSMD4_HUMAN 26S proteasome non-ATPase regulatory subunit 4 OS=Homo sapiens GN=PSMD4 PE=1 SV=1;>tr|Q5VWC4|Q5VWC4_HUMAN 26S proteasome non-ATPase regulatory subunit 4 OS=Homo sapiens GN=PSMD4 PE=4 SV=1;>sp|P55036-2|PSMD4_HUMAN Isoform Rpn10E of 26	265000000	210160000	106750000	56196000	224430000	245960000	158190000	168790000	146140000	158220000	123600000	125590000	96360000	83173000	49428000	73688000	83106000	86657000	109880000	92357000	62739000	83223000	124930000	107050000
P55060-3;P55060;P55060-4;B4DUC5;P55060-2	Exportin-2	CSE1L	>sp|P55060-3|XPO2_HUMAN Isoform 3 of Exportin-2 OS=Homo sapiens GN=CSE1L;>sp|P55060|XPO2_HUMAN Exportin-2 OS=Homo sapiens GN=CSE1L PE=1 SV=3;>sp|P55060-4|XPO2_HUMAN Isoform 4 of Exportin-2 OS=Homo sapiens GN=CSE1L;>tr|B4DUC5|B4DUC5_HUMAN Uncharacterized pr	28892000	60673000	456980000	46727000	81761000	73182000	571990000	516460000	277450000	346530000	453150000	473250000	1607300000	1917200000	1999100000	2307200000	1897000000	1776100000	846990000	900410000	1539200000	1407200000	946770000	995540000
P55072;C9JUP7;C9IZA5	Transitional endoplasmic reticulum ATPase	VCP	>sp|P55072|TERA_HUMAN Transitional endoplasmic reticulum ATPase OS=Homo sapiens GN=VCP PE=1 SV=4	951390000	810950000	736090000	573700000	1021700000	954640000	722420000	749640000	604300000	677380000	798270000	710400000	495120000	545010000	469430000	447100000	614600000	728610000	498140000	516050000	560440000	594600000	526300000	522350000
P55081	Microfibrillar-associated protein 1	MFAP1	>sp|P55081|MFAP1_HUMAN Microfibrillar-associated protein 1 OS=Homo sapiens GN=MFAP1 PE=1 SV=2	16315000	13377000	6321800	1	12511000	7604000	9438400	10079000	1	4714900	1	1	4894600	4896000	1	1	3189400	3198500	10984000	4533700	1	1	4628300	1
P55084;P55084-2;F5GZQ3;B5MD38;C9JEY0;C9JE81;C9K0M0	Trifunctional enzyme subunit beta, mitochondrial;3-ketoacyl-CoA thiolase	HADHB	>sp|P55084|ECHB_HUMAN Trifunctional enzyme subunit beta, mitochondrial OS=Homo sapiens GN=HADHB PE=1 SV=3;>sp|P55084-2|ECHB_HUMAN Isoform 2 of Trifunctional enzyme subunit beta, mitochondrial OS=Homo sapiens GN=HADHB;>tr|F5GZQ3|F5GZQ3_HUMAN 3-ketoacyl-CoA	45687000	48487000	15297000	26469000	45929000	45296000	1291500000	1292900000	778890000	788110000	1019400000	996750000	2502000000	2759100000	2701900000	2779800000	1939100000	2010700000	3804800000	4567000000	5298700000	5196100000	4212600000	4171000000
P55196;P55196-5;A8MQ02;P55196-6;Q5TIG5;H0Y8L4;H0Y9I0;H0Y948;H0Y8U8;H0YA98	Afadin	MLLT4	>sp|P55196|AFAD_HUMAN Afadin OS=Homo sapiens GN=MLLT4 PE=1 SV=3;>sp|P55196-5|AFAD_HUMAN Isoform 5 of Afadin OS=Homo sapiens GN=MLLT4;>tr|A8MQ02|A8MQ02_HUMAN Afadin OS=Homo sapiens GN=MLLT4 PE=2 SV=1;>sp|P55196-6|AFAD_HUMAN Isoform 6 of Afadin OS=Homo sapie	1	1	1	1	1	1	8707800	9886100	5798200	1	6526700	6459900	17393000	16470000	1	22968000	12935000	11663000	21480000	18009000	43353000	36880000	19129000	21566000
P55196-3;C9JX92	Afadin	MLLT4	>sp|P55196-3|AFAD_HUMAN Isoform 3 of Afadin OS=Homo sapiens GN=MLLT4;>tr|C9JX92|C9JX92_HUMAN Afadin OS=Homo sapiens GN=MLLT4 PE=2 SV=1	8296800	8835000	2946000	6149200	11625000	17442000	402490000	406620000	318370000	298220000	305720000	295590000	531250000	653780000	743940000	630700000	577760000	619880000	817710000	900910000	1301600000	1235300000	1033700000	937640000
P55735;E7ERC8;A8MXL6;P55735-2;P55735-3	Protein SEC13 homolog	SEC13	>sp|P55735|SEC13_HUMAN Protein SEC13 homolog OS=Homo sapiens GN=SEC13 PE=1 SV=3;>tr|E7ERC8|E7ERC8_HUMAN Protein SEC13 homolog (Fragment) OS=Homo sapiens GN=SEC13 PE=2 SV=1;>tr|A8MXL6|A8MXL6_HUMAN Protein SEC13 homolog OS=Homo sapiens GN=SEC13 PE=2 SV=1;>sp	1	1	1	1	12640000	1	27618000	25572000	11572000	12283000	9964700	9680700	13434000	15019000	1	1	1	18274000	7823700	11269000	1	1	1	1
P55769;B1AHD1	NHP2-like protein 1;NHP2-like protein 1, N-terminally processed	NHP2L1	>sp|P55769|NH2L1_HUMAN NHP2-like protein 1 OS=Homo sapiens GN=NHP2L1 PE=1 SV=3;>tr|B1AHD1|B1AHD1_HUMAN NHP2-like protein 1 OS=Homo sapiens GN=NHP2L1 PE=2 SV=1	6291500	10248000	3162700	1	12563000	11036000	4271600	3391700	3911100	3272600	4619600	5214000	1	2305300	1	1	2447900	4032800	4718700	6586300	2546300	1	1	1
P55795	Heterogeneous nuclear ribonucleoprotein H2;Heterogeneous nuclear ribonucleoprotein H2, N-terminally processed	HNRNPH2	>sp|P55795|HNRH2_HUMAN Heterogeneous nuclear ribonucleoprotein H2 OS=Homo sapiens GN=HNRNPH2 PE=1 SV=1	9869800	10642000	1	1	10727000	12480000	14816000	13758000	12698000	12259000	8634600	8601600	1	8710400	4716700	8033300	13617000	9630900	5843700	1	1	2583100	10926000	9338300
P55884;P55884-2;C9JZG1;C9JQN7	Eukaryotic translation initiation factor 3 subunit B	EIF3B	>sp|P55884|EIF3B_HUMAN Eukaryotic translation initiation factor 3 subunit B OS=Homo sapiens GN=EIF3B PE=1 SV=3;>sp|P55884-2|EIF3B_HUMAN Isoform 2 of Eukaryotic translation initiation factor 3 subunit B OS=Homo sapiens GN=EIF3B	426850000	417480000	585410000	780570000	401640000	428710000	314700000	308210000	309870000	316970000	260830000	284840000	204170000	152820000	156820000	153260000	188820000	173740000	242580000	192680000	216880000	228360000	240890000	243250000
P56134-4;C9JJT5;P56134-3;P56134-2;F5H4H2;P56134;C9JU26;G3V325	ATP synthase subunit f, mitochondrial	ATP5J2;PTCD1;ATP5J2-PTCD1	>sp|P56134-4|ATPK_HUMAN Isoform 4 of ATP synthase subunit f, mitochondrial OS=Homo sapiens GN=ATP5J2;>tr|C9JJT5|C9JJT5_HUMAN Protein ATP5J2-PTCD1 OS=Homo sapiens GN=ATP5J2-PTCD1 PE=4 SV=2;>sp|P56134-3|ATPK_HUMAN Isoform 3 of ATP synthase subunit f, mitocho	6167900	5324800	7343300	44474000	6873700	7305900	1	14805000	10370000	7444600	12844000	28504000	1	1	30733000	1	31492000	35644000	22006000	23201000	21801000	24983000	36264000	33347000
P56182;D6RE82	Ribosomal RNA processing protein 1 homolog A	RRP1	>sp|P56182|RRP1_HUMAN Ribosomal RNA processing protein 1 homolog A OS=Homo sapiens GN=RRP1 PE=1 SV=1	2591900	1402700	1	1	2861500	4876500	105460000	88810000	21792000	28721000	73519000	82605000	162370000	157670000	201060000	199360000	137000000	135480000	192350000	156500000	192580000	71504000	149400000	151110000
P56192;B3KVK7;A6NC17;H0YHV5;H0YIP0;H0YI94;H0YIC2;H0YHL6;H0YI27;F5H2V6	Methionine--tRNA ligase, cytoplasmic	MARS	>sp|P56192|SYMC_HUMAN Methionine--tRNA ligase, cytoplasmic OS=Homo sapiens GN=MARS PE=1 SV=2;>tr|B3KVK7|B3KVK7_HUMAN Methionine--tRNA ligase, cytoplasmic OS=Homo sapiens GN=MARS PE=2 SV=1;>tr|A6NC17|A6NC17_HUMAN Methionine--tRNA ligase, cytoplasmic OS=Homo	33457000	32951000	48243000	26346000	28452000	33945000	67730000	64909000	45261000	52325000	40931000	54275000	67611000	68319000	63661000	69329000	72475000	83945000	56434000	51635000	236760000	85350000	52355000	62996000
P56385	ATP synthase subunit e, mitochondrial	ATP5I	>sp|P56385|ATP5I_HUMAN ATP synthase subunit e, mitochondrial OS=Homo sapiens GN=ATP5I PE=1 SV=2	13027000	13336000	15367000	21626000	13418000	15062000	54252000	41989000	22361000	25237000	15457000	22151000	37193000	28199000	27388000	57902000	1	1	16712000	13175000	20725000	20467000	27651000	7101000
[truncated: 728 more rows]

## Sheet: KRAS WT SPECIFIC
Protein IDs	Gene names	Average EV	Average WT	RATIO WT/EV	T.TEST
[truncated: 277 more rows]

[truncated: 5 more sheets: KRASG13D SPECIFIC, KRASG12V SPECIFIC, DIF WT VS G13D, DIF WT VS G12V, DIF G13D VS G12V]
