# Supplementary material for: Proteomic Mapping of the Interactome of KRAS Mutants Identifies New Features of RAS Signalling Networks and the Mechanism of Action of Sotorasib
Source: Cancers (Basel). 2023 Aug 17;15(16):4141. doi: 10.3390/cancers15164141 (PMC10452836; doi:10.3390/cancers15164141)
Supplement: Supplementary file 1 [file cancers-15-04141-s001.zip › Table S2 HKe3 KRAS interactome.xlsx]

## Sheet: DESCRIPTION
		LFQ Intensities tab shows all the proteins identified in the experiment	Immunoprecipitation FLAG Trap
		HEK293 cell line transfected with:	Experiment label
		pCEFL-FLAG	EV
		pCEFL-FLAG-KRAS WT	WT
		pCEFL-FLAG-KRASG13D	G13D
		pCEFL-FLAG-KRASG12V	G12V
Description			Cut off
KRAS specific interacting proteins cut off		ratio Average LFQ condition/Average LFQ EV	>2
Tabs: specific KRAS WT; specific KRASG13D; specific KRASG12V		T.TEST LFQ condition vs LFQ EV	p-value <0.01
KRAS specific interacting proteins cut off		ratio Average LFQ condition 1/Average LFQ condition 2	>2 or <0.5
Tabs: DIF KRAS WT VS KRASG12V		T.TEST LFQ condition 1 VS LFQ condition 2	p-value <0.05
Normalised KRAS specific interacting proteins		ratio G13D/WT of KRAS bait protein; ratio of G13D/G12V of KRAS bait protein
Tabs: Normalised LFQ Intensities		KRAS ratio G13D/WT*LFQ intensity for WT samples
Tabs: Normalised LFQ Intensities		KRAS ratio G13D/G12V*LFQ intensity for G12V samples
KRAS specific interacting proteins cut off		ratio Average Normalised LFQ condition 1/Average LFQ condition 2	>2 or <0.5
Tabs: DIF NORMALISED KRAS WT VS G13D; DIF G13D VS NORMALISED G12V		T.TEST LFQ condition 1 VS LFQ condition 2	p-value <0.05

## Sheet: LFQ INTENSITIES
Protein IDs	Protein names	Gene names	Fasta headers	LFQ intensity EV 1	LFQ intensity EV 1_1	LFQ intensity EV 2	LFQ intensity EV 2_1	LFQ intensity EV 3	LFQ intensity EV 3_1	LFQ intensity WT 1	LFQ intensity WT 1_1	LFQ intensity WT 2	LFQ intensity WT 2_1	LFQ intensity WT 3	LFQ intensity WT 3_1	LFQ intensity G13D 1	LFQ intensity G13D 1_1	LFQ intensity G13D 2	LFQ intensity G13D 2_1	LFQ intensity G13D 3	LFQ intensity G13D 3_1	LFQ intensity G12V 1	LFQ intensity G12V 1_1	LFQ intensity G12V 2	LFQ intensity G12V 2_1	LFQ intensity G12V 3	LFQ intensity G12V 3_1
A8MU27;B4DUW4;A8MUA9;P55854;H7BZT4;P61956;Q6EEV6;P61956-2	Small ubiquitin-related modifier 3;Small ubiquitin-related modifier 2;Small ubiquitin-related modifier 4	SUMO3;SUMO2;SUMO4	>tr|A8MU27|A8MU27_HUMAN Small ubiquitin-related modifier 3 OS=Homo sapiens GN=SUMO3 PE=2 SV=1;>tr|B4DUW4|B4DUW4_HUMAN Small ubiquitin-related modifier 3 OS=Homo sapiens GN=SUMO3 PE=2 SV=1;>tr|A8MUA9|A8MUA9_HUMAN SMT3 suppressor of mif two 3 homolog 3 (Yeas	7740000	5740800	10749000	8028300	1529200	1558000	3848800	1758800	1	1920900	1711800	2380100	5691400	6466600	4166500	3019900	1	1736100	4773200	1	6553500	1250400	1	1
A8MWD9;P62308;F5H013;Q49AN9;C9JVQ0	Small nuclear ribonucleoprotein G-like protein;Small nuclear ribonucleoprotein G	SNRPG	>sp|A8MWD9|RUXGL_HUMAN Small nuclear ribonucleoprotein G-like protein OS=Homo sapiens PE=3 SV=2;>sp|P62308|RUXG_HUMAN Small nuclear ribonucleoprotein G OS=Homo sapiens GN=SNRPG PE=1 SV=1;>tr|F5H013|F5H013_HUMAN Small nuclear ribonucleoprotein G OS=Homo sap	19202000	18766000	16023000	9853100	4385000	5362800	11848000	6819700	11708000	11983000	8044900	7043100	13797000	25893000	6617400	7791600	10674000	6827000	7002900	1	6711800	10193000	9169400	1
A8MXP9;P43243;D6REM6;D6R991;P43243-2;B3KM87;H0Y8T4;D6RIA2;D6RE02;D6RBK5;D6RBI2;D6R8Z5;D6REK4;D6RCM3;D6RBS2;D6RAY2;D6RAM9;D6R9F3;D6RB45	Matrin-3	MATR3	>tr|A8MXP9|A8MXP9_HUMAN Matrin-3 OS=Homo sapiens GN=MATR3 PE=2 SV=1;>sp|P43243|MATR3_HUMAN Matrin-3 OS=Homo sapiens GN=MATR3 PE=1 SV=2;>tr|D6REM6|D6REM6_HUMAN Matrin-3 OS=Homo sapiens GN=MATR3 PE=2 SV=1;>tr|D6R991|D6R991_HUMAN Matrin-3 (Fragment) OS=Homo s	17580000	16122000	15605000	14120000	19026000	20854000	10108000	9181000	1	9649700	13032000	12821000	18614000	10539000	10474000	11836000	13419000	7839400	12405000	1	6371400	6149700	1	1
B0QY89;Q9Y262;Q9Y262-2;B0QY90;C9K0Q7;C9JHP4;H7C3A0;H0Y7E6	Eukaryotic translation initiation factor 3 subunit L	EIF3EIP;EIF3L	>tr|B0QY89|B0QY89_HUMAN Eukaryotic translation initiation factor 3 subunit L OS=Homo sapiens GN=EIF3L PE=2 SV=1;>sp|Q9Y262|EIF3L_HUMAN Eukaryotic translation initiation factor 3 subunit L OS=Homo sapiens GN=EIF3L PE=1 SV=1;>sp|Q9Y262-2|EIF3L_HUMAN Isoform	214520000	254930000	262850000	301900000	269340000	268430000	170580000	180500000	185730000	181420000	177340000	167940000	212290000	233010000	183300000	188190000	147660000	144040000	150810000	158460000	161790000	178440000	184070000	178370000
B0YIW2;P02656	Apolipoprotein C-III	APOC3	>tr|B0YIW2|B0YIW2_HUMAN Apolipoprotein C-III OS=Homo sapiens GN=APOC3 PE=2 SV=1;>sp|P02656|APOC3_HUMAN Apolipoprotein C-III OS=Homo sapiens GN=APOC3 PE=1 SV=1	1	1	7515900	4639400	6724900	7052300	6122000	13704000	5729700	4312600	6260600	5227100	1	1	4627600	3967900	5951100	4426500	5805400	6145300	7043100	6214800	4911800	4159400
B1AK88;P47756;P47756-2;B1AK87;B1AK85;F6USW4	F-actin-capping protein subunit beta	CAPZB	>tr|B1AK88|B1AK88_HUMAN Capping protein (Actin filament) muscle Z-line, beta, isoform CRA_d OS=Homo sapiens GN=CAPZB PE=2 SV=1;>sp|P47756|CAPZB_HUMAN F-actin-capping protein subunit beta OS=Homo sapiens GN=CAPZB PE=1 SV=4;>sp|P47756-2|CAPZB_HUMAN Isoform 2	17350000	15277000	15727000	19769000	11935000	15990000	13827000	16228000	17984000	16336000	9856800	9833900	14183000	9339500	9935000	11494000	9698600	10246000	15969000	21476000	11523000	13494000	19550000	17502000
B3KS98;O15372;E5RJT0;E5RGU4;E5RFH0;E5RFW7;E5RH59;E5RHC7	Eukaryotic translation initiation factor 3 subunit H	EIF3S3;EIF3H	>tr|B3KS98|B3KS98_HUMAN Eukaryotic translation initiation factor 3 subunit H OS=Homo sapiens GN=EIF3H PE=2 SV=1;>sp|O15372|EIF3H_HUMAN Eukaryotic translation initiation factor 3 subunit H OS=Homo sapiens GN=EIF3H PE=1 SV=1;>tr|E5RJT0|E5RJT0_HUMAN Eukaryoti	86958000	74432000	94168000	110740000	68806000	83016000	79291000	72078000	88218000	76837000	73675000	77962000	98125000	71811000	75653000	76096000	73961000	63891000	62412000	43050000	72219000	78649000	88596000	79373000
B3KSH1;O00303;B4DEW9;H0YDT6;E9PQV8	Eukaryotic translation initiation factor 3 subunit F	EIF3F	>tr|B3KSH1|B3KSH1_HUMAN Eukaryotic translation initiation factor 3 subunit F OS=Homo sapiens GN=EIF3F PE=2 SV=1;>sp|O00303|EIF3F_HUMAN Eukaryotic translation initiation factor 3 subunit F OS=Homo sapiens GN=EIF3F PE=1 SV=1;>tr|B4DEW9|B4DEW9_HUMAN Eukaryoti	105600000	106440000	118300000	135100000	125140000	126030000	83389000	81354000	85874000	83297000	76741000	78847000	92253000	99888000	91317000	102400000	80726000	66978000	65654000	83237000	82699000	83204000	82624000	82549000
B4DLN1;Q9UBX3-2;Q9UBX3;B4E1E9;P52815	Mitochondrial dicarboxylate carrier	SLC25A10	>tr|B4DLN1|B4DLN1_HUMAN Mitochondrial dicarboxylate carrier OS=Homo sapiens GN=SLC25A10 PE=2 SV=1;>sp|Q9UBX3-2|DIC_HUMAN Isoform 2 of Mitochondrial dicarboxylate carrier OS=Homo sapiens GN=SLC25A10;>sp|Q9UBX3|DIC_HUMAN Mitochondrial dicarboxylate carrier O	16220000	19521000	17595000	14922000	32054000	31043000	9098800	21583000	10226000	14904000	6826700	12101000	13750000	23157000	14457000	9672400	19009000	18695000	10646000	9673800	12980000	20472000	21604000	22722000
B4DR52;U3KQK0;Q5QNW6-2;O60814;P58876;P62807;Q5QNW6;Q93079;Q99877;Q99879;Q99880;P57053;Q96A08	Histone H2B;Histone H2B type 1-K;Histone H2B type 1-D;Histone H2B type 1-C/E/F/G/I;Histone H2B type 2-F;Histone H2B type 1-H;Histone H2B type 1-N;Histone H2B type 1-M;Histone H2B type 1-L;Histone H2B type F-S;Histone H2B type 1-A	HIST2H2BF;HIST1H2BK;HIST1H2BD;HIST1H2BC;HIST1H2BH;HIST1H2BN;HIST1H2BM;HIST1H2BL;H2BFS;HIST1H2BA	>tr|B4DR52|B4DR52_HUMAN Histone H2B OS=Homo sapiens GN=HIST2H2BF PE=2 SV=1;>tr|U3KQK0|U3KQK0_HUMAN Histone H2B OS=Homo sapiens GN=HIST1H2BN PE=3 SV=1;>sp|Q5QNW6-2|H2B2F_HUMAN Isoform 2 of Histone H2B type 2-F OS=Homo sapiens GN=HIST2H2BF;>sp|O60814|H2B1K_H	51937000	43435000	28909000	18927000	67155000	61807000	6825200	6971900	82120000	71657000	20613000	25683000	36582000	34298000	8098100	8714400	38115000	29748000	1	10836000	50435000	46390000	11049000	14661000
B4DYH1;Q92598;Q92598-3;Q92598-2;B4DY72	Heat shock protein 105 kDa	HSPH1	>tr|B4DYH1|B4DYH1_HUMAN Heat shock 105kDa/110kDa protein 1, isoform CRA_b OS=Homo sapiens GN=HSPH1 PE=2 SV=1;>sp|Q92598|HS105_HUMAN Heat shock protein 105 kDa OS=Homo sapiens GN=HSPH1 PE=1 SV=1;>sp|Q92598-3|HS105_HUMAN Isoform 3 of Heat shock protein 105 k	2131400	3722200	1828500	1947100	4264700	1972300	1	1	1	1	1	1	1354000	1630100	1029400	1	1	1	1	1	1	1278500	1	1
B7Z6Z4;G3V1V0;G8JLA2;J3KND3;P60660;P60660-2;F8W1R7;F8VPF3;G3V1Y7;F8W180;F8VZU9;P14649;F8W1I5;H0YI43;F8VXL3	Myosin light polypeptide 6	MYL6	>tr|B7Z6Z4|B7Z6Z4_HUMAN Myosin light polypeptide 6 OS=Homo sapiens GN=MYL6 PE=2 SV=1;>tr|G3V1V0|G3V1V0_HUMAN Myosin light polypeptide 6 OS=Homo sapiens GN=MYL6 PE=2 SV=1;>tr|G8JLA2|G8JLA2_HUMAN Myosin light polypeptide 6 OS=Homo sapiens GN=MYL6 PE=2 SV=1;>	37290000	39925000	44651000	44359000	63791000	62640000	15908000	19256000	14694000	17279000	11878000	12076000	28209000	32877000	19833000	15010000	14936000	15829000	14933000	13731000	24955000	20946000	13982000	11396000
C9IZE4;Q15008;Q15008-2;E9PHI9;C9J0E9;H7C531;C9J7B7	26S proteasome non-ATPase regulatory subunit 6	PSMD6	>tr|C9IZE4|C9IZE4_HUMAN 26S proteasome non-ATPase regulatory subunit 6 OS=Homo sapiens GN=PSMD6 PE=2 SV=1;>sp|Q15008|PSMD6_HUMAN 26S proteasome non-ATPase regulatory subunit 6 OS=Homo sapiens GN=PSMD6 PE=1 SV=1;>sp|Q15008-2|PSMD6_HUMAN Isoform 2 of 26S pro	21206000	9713400	5414800	12314000	13907000	9808800	3535500	1	2709300	7361400	2596700	9274500	4138500	1	3872000	4684800	3136900	4573800	1	1	8630300	8453200	2612100	3042700
C9JA08;Q96D46;C9J0B9;C9K0C2;C9IZW9;C9IY70	60S ribosomal export protein NMD3	NMD3	>tr|C9JA08|C9JA08_HUMAN 60S ribosomal export protein NMD3 OS=Homo sapiens GN=NMD3 PE=2 SV=1;>sp|Q96D46|NMD3_HUMAN 60S ribosomal export protein NMD3 OS=Homo sapiens GN=NMD3 PE=1 SV=1;>tr|C9J0B9|C9J0B9_HUMAN 60S ribosomal export protein NMD3 (Fragment) OS=Ho	3093000	1403900	2067100	1	1217700	1	12190000	15845000	105960000	14274000	7891400	7851900	1	14341000	53643000	54705000	10398000	11731000	36047000	28146000	15938000	22998000	54044000	63608000
E5RJR5;P63208	S-phase kinase-associated protein 1	SKP1	>tr|E5RJR5|E5RJR5_HUMAN S-phase kinase-associated protein 1 OS=Homo sapiens GN=SKP1 PE=2 SV=1;>sp|P63208|SKP1_HUMAN S-phase kinase-associated protein 1 OS=Homo sapiens GN=SKP1 PE=1 SV=2	1	1573400	2499600	2185800	1892200	2677700	1	1548900	1	1	1592900	1607700	1	1	1	1	1	1	1	1	1	1	1	1
E7EQ64;CON__P07477;P07477;J3KQC6;Q9BYE2;E9PRA0;F8WAJ3;Q9BYE2-2;Q9BYE2-5;E9PIJ5;Q9BYE2-3;P07478;Q8NHM4;H0Y8D1	Trypsin-1;Alpha-trypsin chain 1;Alpha-trypsin chain 2;Transmembrane protease serine 13;Trypsin-2;Putative trypsin-6	PRSS1;TMPRSS13;PRSS2;TRY6	>tr|E7EQ64|E7EQ64_HUMAN Trypsin-1 OS=Homo sapiens GN=PRSS1 PE=2 SV=1;>P07477 SWISS-PROT:P07477 Tax_Id=9606 Gene_Symbol=PRSS1 Trypsin-1 precursor;>sp|P07477|TRY1_HUMAN Trypsin-1 OS=Homo sapiens GN=PRSS1 PE=1 SV=1;>tr|J3KQC6|J3KQC6_HUMAN Transmembrane protea	4016200000	3304800000	3674700000	4141300000	4697800000	5932500000	5992600000	7632000000	6727200000	4871200000	372960000	339650000	3220900000	3737800000	4843700000	5662600000	5924600000	413860000	474990000	8597900000	6892100000	8003600000	5578400000	6386600000
E7EQZ4;Q16637;Q16637-3;Q16637-2;Q16637-4;B4DP61;H0YBZ9	Survival motor neuron protein	SMN1	>tr|E7EQZ4|E7EQZ4_HUMAN Survival motor neuron protein OS=Homo sapiens GN=SMN1 PE=2 SV=1;>sp|Q16637|SMN_HUMAN Survival motor neuron protein OS=Homo sapiens GN=SMN1 PE=1 SV=1;>sp|Q16637-3|SMN_HUMAN Isoform SMN-delta7 of Survival motor neuron protein OS=Homo	4848000	1	7365800	7861900	5129400	5758000	11920000	11092000	8801400	10760000	18251000	14787000	21937000	21360000	28788000	38627000	28241000	43799000	10528000	10045000	13972000	14823000	8294400	12533000
E7ESC7;Q7L5Y9;B4DVN3;Q7L5Y9-2;Q7L5Y9-3;B4DQT1;E7ENL1;D6RE80	Macrophage erythroblast attacher	MAEA	>tr|E7ESC7|E7ESC7_HUMAN Macrophage erythroblast attacher OS=Homo sapiens GN=MAEA PE=2 SV=1;>sp|Q7L5Y9|MAEA_HUMAN Macrophage erythroblast attacher OS=Homo sapiens GN=MAEA PE=1 SV=1;>tr|B4DVN3|B4DVN3_HUMAN Macrophage erythroblast attacher OS=Homo sapiens GN=	1493500	2801000	2893400	3692800	2765700	1	2342600	4258800	1	1	1	1	3042600	1	2147500	2293800	1	1	1	1	2748900	1	1	1
E7ESW6;Q6ZQQ6-2;Q6ZQQ6	WD repeat-containing protein 87	WDR87	>tr|E7ESW6|E7ESW6_HUMAN WD repeat-containing protein 87 OS=Homo sapiens GN=WDR87 PE=2 SV=1;>sp|Q6ZQQ6-2|WDR87_HUMAN Isoform 2 of WD repeat-containing protein 87 OS=Homo sapiens GN=WDR87;>sp|Q6ZQQ6|WDR87_HUMAN WD repeat-containing protein 87 OS=Homo sapiens	23774000	18378000	27578000	21496000	9230200	9604800	20613000	23512000	14286000	3453300	16170000	14703000	2690100	12261000	1	14941000	12203000	9274700	16445000	4027800	15757000	17249000	3712900	4357300
E7ETU3;P60953	Cell division control protein 42 homolog	CDC42	>tr|E7ETU3|E7ETU3_HUMAN Cell division control protein 42 homolog OS=Homo sapiens GN=CDC42 PE=2 SV=1;>sp|P60953|CDC42_HUMAN Cell division control protein 42 homolog OS=Homo sapiens GN=CDC42 PE=1 SV=2	2953300	3426800	2583000	1309700	1	1	1	1019600	1	1	884750	1	1788600	1408100	1066900	1171300	1	1	1	1	1461000	1875700	1	1
E7EU23;P50395;P50395-2;Q5SX87;Q5SX86;Q5SX90;P31150;Q5SX91;G5E9U5	Rab GDP dissociation inhibitor beta	GDI2	>tr|E7EU23|E7EU23_HUMAN Rab GDP dissociation inhibitor beta OS=Homo sapiens GN=GDI2 PE=2 SV=1;>sp|P50395|GDIB_HUMAN Rab GDP dissociation inhibitor beta OS=Homo sapiens GN=GDI2 PE=1 SV=2;>sp|P50395-2|GDIB_HUMAN Isoform 2 of Rab GDP dissociation inhibitor be	147540000	139940000	136500000	145770000	160490000	162410000	127080000	119970000	125970000	129680000	101250000	103120000	87613000	81848000	113610000	113560000	85144000	100990000	98411000	104860000	130460000	140990000	118290000	133300000
E7EVA0;P27816;P27816-6;P27816-2;B9ZVR1;P27816-5;E9PGM5;P27816-4;F8W9U4;B5MEG9;H7C4C5;H0Y2V1;H7C456;B4DSQ1	Microtubule-associated protein;Microtubule-associated protein 4	MAP4	>tr|E7EVA0|E7EVA0_HUMAN Microtubule-associated protein OS=Homo sapiens GN=MAP4 PE=2 SV=1;>sp|P27816|MAP4_HUMAN Microtubule-associated protein 4 OS=Homo sapiens GN=MAP4 PE=1 SV=3;>sp|P27816-6|MAP4_HUMAN Isoform 6 of Microtubule-associated protein 4 OS=Homo	666590	3024700	3108800	1472900	5957800	3729000	2386300	787420	3475000	4321400	1	1	2572000	1901000	2721700	2759700	3244600	2426100	1180100	2384500	3303300	2374600	1391100	1
E7EVH7;Q07866-9;Q07866-4;G3V5R9;Q07866-6;Q9H0B6;Q07866-10;Q07866-5;G3V3H3;Q07866-7;F8W6L3;Q07866;Q07866-3;Q07866-2;G3V2E7;Q07866-8;Q9H0B6-2;A8MZ87;A8MX29;E9PQ02	Kinesin light chain 2;Kinesin light chain 1	KLC1;KLC2	>tr|E7EVH7|E7EVH7_HUMAN Kinesin light chain 1 OS=Homo sapiens GN=KLC1 PE=2 SV=1;>sp|Q07866-9|KLC1_HUMAN Isoform I of Kinesin light chain 1 OS=Homo sapiens GN=KLC1;>sp|Q07866-4|KLC1_HUMAN Isoform J of Kinesin light chain 1 OS=Homo sapiens GN=KLC1;>tr|G3V5R9	1	1	1	1	1	5595200	1	1	1	1	1	1	1	1	1	1	1	1	1	1	1	1	1	1
E7EX17;P23588;B4DS13;F8VX11;F8VP89;F8VSC7;F8W0K0;F8VYE9;F8VRU1;REV__E7EX17;REV__P23588;REV__B4DS13;REV__F8VX11	Eukaryotic translation initiation factor 4B	EIF4B	>tr|E7EX17|E7EX17_HUMAN Eukaryotic translation initiation factor 4B OS=Homo sapiens GN=EIF4B PE=2 SV=1;>sp|P23588|IF4B_HUMAN Eukaryotic translation initiation factor 4B OS=Homo sapiens GN=EIF4B PE=1 SV=2;>tr|B4DS13|B4DS13_HUMAN Eukaryotic translation initi	687010000	655810000	5701600000	6167000000	2949100000	3089000000	7502300000	7400300000	7158500000	9524100000	8871200000	9239900000	5710600000	5938100000	8864600000	9281400000	7444400000	7427100000	7440600000	6412100000	9139500000	9239200000	8795700000	7920400000
E7EX29;P63104;E7ESK7;B0AZS6;E7EVZ2;E9PD24;E5RIR4;E5RGE1;P63104-2;H0YB80;B7Z2E6	14-3-3 protein zeta/delta	YWHAZ	>tr|E7EX29|E7EX29_HUMAN 14-3-3 protein zeta/delta (Fragment) OS=Homo sapiens GN=YWHAZ PE=2 SV=1;>sp|P63104|1433Z_HUMAN 14-3-3 protein zeta/delta OS=Homo sapiens GN=YWHAZ PE=1 SV=1;>tr|E7ESK7|E7ESK7_HUMAN 14-3-3 protein zeta/delta (Fragment) OS=Homo sapiens	145780000	127690000	230150000	206930000	132330000	141280000	41494000	50410000	34947000	41624000	15416000	20912000	197490000	222010000	136980000	151190000	109010000	116290000	30031000	40463000	48927000	46085000	28726000	43208000
E9PAV3;Q13765-2;Q13765;H0YHX9;F8W0W4;F8VNW4;F8VZJ2;F8W1N5;Q9BZK3;F8VZ58	Nascent polypeptide-associated complex subunit alpha	NACA	>tr|E9PAV3|E9PAV3_HUMAN Nascent polypeptide-associated complex subunit alpha OS=Homo sapiens GN=NACA PE=2 SV=1;>sp|Q13765-2|NACA_HUMAN Isoform 2 of Nascent polypeptide-associated complex subunit alpha OS=Homo sapiens GN=NACA;>sp|Q13765|NACA_HUMAN Nascent p	58417000	39659000	11054000	10805000	27042000	19641000	3589200	3716000	1	1	3978400	4237800	20044000	19707000	3252400	3639500	5061700	8494600	1	1	1	1	1	1
E9PB61;Q86V81	THO complex subunit 4	ALYREF	>tr|E9PB61|E9PB61_HUMAN THO complex subunit 4 OS=Homo sapiens GN=ALYREF PE=2 SV=1;>sp|Q86V81|THOC4_HUMAN THO complex subunit 4 OS=Homo sapiens GN=ALYREF PE=1 SV=3	48819000	33377000	23165000	29512000	36037000	30165000	35113000	32414000	28776000	30857000	31572000	27875000	42481000	46369000	32303000	32770000	28163000	29285000	22237000	19688000	41161000	40102000	26685000	31130000
E9PJN9		RPS3	>tr|E9PJN9|E9PJN9_HUMAN 40S ribosomal protein S3 (Fragment) OS=Homo sapiens GN=RPS3 PE=2 SV=1	6182700	8680100	1	1	1	1	1	1	1	1	1	1	8202900	8029200	1	1	1	1	1	1	1	1	1	1
E9PK25;P23528;E9PP50;G3V1A4;E9PQB7;E9PS23;E9PLJ3	Cofilin-1	CFL1	>tr|E9PK25|E9PK25_HUMAN Cofilin-1 OS=Homo sapiens GN=CFL1 PE=2 SV=1;>sp|P23528|COF1_HUMAN Cofilin-1 OS=Homo sapiens GN=CFL1 PE=1 SV=3;>tr|E9PP50|E9PP50_HUMAN Cofilin-1 (Fragment) OS=Homo sapiens GN=CFL1 PE=2 SV=1;>tr|G3V1A4|G3V1A4_HUMAN Cofilin 1 (Non-musc	244640000	173660000	190270000	216090000	183470000	180600000	200320000	191270000	154310000	184470000	161160000	155270000	133820000	144380000	136450000	153660000	155650000	154570000	191590000	245850000	197420000	191470000	173630000	175540000
E9PK91;Q9NYF8-3;E9PKI6;E9PQN2;E9PK09;E9PJA7;H0YF63;H0YF00		BCLAF1	>tr|E9PK91|E9PK91_HUMAN Bcl-2-associated transcription factor 1 OS=Homo sapiens GN=BCLAF1 PE=2 SV=1;>sp|Q9NYF8-3|BCLF1_HUMAN Isoform 3 of Bcl-2-associated transcription factor 1 OS=Homo sapiens GN=BCLAF1;>tr|E9PKI6|E9PKI6_HUMAN Bcl-2-associated transcripti	59414000	47450000	69391000	67696000	7658900	1	89745000	83684000	64892000	102770000	67447000	86746000	51773000	49648000	63791000	92725000	71943000	64952000	90124000	75552000	127610000	83953000	67505000	32554000
E9PR30;P62861	40S ribosomal protein S30	FAU	>tr|E9PR30|E9PR30_HUMAN 40S ribosomal protein S30 OS=Homo sapiens GN=FAU PE=2 SV=1;>sp|P62861|RS30_HUMAN 40S ribosomal protein S30 OS=Homo sapiens GN=FAU PE=1 SV=1	574350000	489080000	39707000	43193000	65923000	58277000	58153000	68752000	43047000	37890000	76220000	67242000	244060000	201180000	54544000	60453000	68212000	52282000	11233000	34953000	62094000	63632000	42986000	37234000
E9PRY8;P29692-2;P29692;E9PK01;P29692-3;E9PI39;E9PQ49;P29692-4;E9PL12;E9PPR1;E9PQZ1;H0YCK7;E9PL71;E9PIZ1;E9PMW7;E9PK06;E9PN91;H0YE72;H0YE58;E9PK72;E9PKK3;E9PQC9;E9PJD0;E9PNW6	Elongation factor 1-delta	EEF1D	>tr|E9PRY8|E9PRY8_HUMAN Elongation factor 1-delta OS=Homo sapiens GN=EEF1D PE=2 SV=1;>sp|P29692-2|EF1D_HUMAN Isoform 2 of Elongation factor 1-delta OS=Homo sapiens GN=EEF1D;>sp|P29692|EF1D_HUMAN Elongation factor 1-delta OS=Homo sapiens GN=EEF1D PE=1 SV=5;	151740000	142830000	248190000	232660000	297480000	291450000	210900000	225190000	239650000	262530000	186260000	204100000	242160000	237630000	223790000	233680000	204480000	210100000	156640000	190720000	278380000	260400000	202070000	204360000
F5GWP8;C9JKY1;C9JK18;C9J826;C9JTX4;K7ERP3;C9JPI2		JUP	>tr|F5GWP8|F5GWP8_HUMAN Junction plakoglobin OS=Homo sapiens GN=JUP PE=2 SV=1	90852000	101280000	81050000	71571000	66237000	63861000	45557000	60868000	63940000	63551000	75564000	65993000	77544000	88146000	60526000	64975000	63823000	67765000	109890000	162120000	70111000	75789000	213100000	202570000
F5GY56;Q9UMS4	Pre-mRNA-processing factor 19	PRPF19	>tr|F5GY56|F5GY56_HUMAN Pre-mRNA-processing factor 19 (Fragment) OS=Homo sapiens GN=PRPF19 PE=2 SV=1;>sp|Q9UMS4|PRP19_HUMAN Pre-mRNA-processing factor 19 OS=Homo sapiens GN=PRPF19 PE=1 SV=1	1	1	1	1	5585900	1	1	1	1	1	1	1	1	1	6157900	1	1	1	1	1	1	1	1	1
F5H012;P19474;P19474-2;H0YDP8	E3 ubiquitin-protein ligase TRIM21	TRIM21	>tr|F5H012|F5H012_HUMAN E3 ubiquitin-protein ligase TRIM21 OS=Homo sapiens GN=TRIM21 PE=2 SV=1;>sp|P19474|RO52_HUMAN E3 ubiquitin-protein ligase TRIM21 OS=Homo sapiens GN=TRIM21 PE=1 SV=1;>sp|P19474-2|RO52_HUMAN Isoform 2 of E3 ubiquitin-protein ligase TRI	1093700000	1184900000	1867700000	1932000000	839170000	877280000	2685300000	2936200000	2478600000	2631600000	2734300000	2875700000	1511700000	1546800000	2513900000	2460800000	2333100000	2338200000	2241800000	2502600000	2400300000	2249200000	2053700000	2029100000
F5H2S7;Q13561-2;Q13561-3;Q13561;F5H223;F8W1I6;F8VW18;H0YI98;F8VRV7;F8VX93;H0YHL1	Dynactin subunit 2	DCTN2	>tr|F5H2S7|F5H2S7_HUMAN Dynactin subunit 2 OS=Homo sapiens GN=DCTN2 PE=2 SV=1;>sp|Q13561-2|DCTN2_HUMAN Isoform 2 of Dynactin subunit 2 OS=Homo sapiens GN=DCTN2;>sp|Q13561-3|DCTN2_HUMAN Isoform 3 of Dynactin subunit 2 OS=Homo sapiens GN=DCTN2;>sp|Q13561|DCT	12299000	10924000	17484000	17649000	20638000	17654000	14070000	14200000	15117000	15941000	13902000	15776000	15248000	16798000	12434000	14360000	14702000	16517000	15859000	15131000	17707000	11580000	13474000	14345000
F8VQ10;Q13838-2;Q13838;Q5STU3;F6WLT2;O00148;F6TRA5;F6UN21;F6S4E6;O00148-2;B1Q2N1;K7EQN7;F6R6M7;F6QYI9;K7EPJ3;K7EN25;E7EMX2;F6SXL5;F6S2B7;K7EN69;F6U6E2;K7EIL8;K7EL56;F6QWI5;K7ENP6	Spliceosome RNA helicase DDX39B;ATP-dependent RNA helicase DDX39A	DDX39B;BAT1;DDX39A	>tr|F8VQ10|F8VQ10_HUMAN Spliceosome RNA helicase DDX39B OS=Homo sapiens GN=DDX39B PE=2 SV=1;>sp|Q13838-2|DX39B_HUMAN Isoform 2 of Spliceosome RNA helicase DDX39B OS=Homo sapiens GN=DDX39B;>sp|Q13838|DX39B_HUMAN Spliceosome RNA helicase DDX39B OS=Homo sapie	58292000	52328000	62784000	60510000	40561000	29017000	33509000	37947000	26372000	25364000	29841000	27307000	42608000	29061000	36233000	29734000	27674000	26441000	61924000	35728000	24558000	29774000	33389000	34428000
F8W727;P62910;D3YTB1;D3YTI8	60S ribosomal protein L32	RPL32	>tr|F8W727|F8W727_HUMAN 60S ribosomal protein L32 OS=Homo sapiens GN=RPL32 PE=2 SV=1;>sp|P62910|RL32_HUMAN 60S ribosomal protein L32 OS=Homo sapiens GN=RPL32 PE=1 SV=2;>tr|D3YTB1|D3YTB1_HUMAN 60S ribosomal protein L32 (Fragment) OS=Homo sapiens GN=RPL32 PE	480970000	380860000	42422000	29956000	83066000	69591000	57905000	47722000	61434000	79373000	66888000	73762000	271770000	268950000	95403000	93540000	128590000	116650000	66467000	54419000	74075000	85940000	48923000	51842000
F8W930;Q9Y6M1;Q9Y6M1-1;Q9Y6M1-4;Q9Y6M1-3;Q9Y6M1-6;Q9Y6M1-5	Insulin-like growth factor 2 mRNA-binding protein 2	IGF2BP2	>tr|F8W930|F8W930_HUMAN Insulin-like growth factor 2 mRNA-binding protein 2 OS=Homo sapiens GN=IGF2BP2 PE=2 SV=1;>sp|Q9Y6M1|IF2B2_HUMAN Insulin-like growth factor 2 mRNA-binding protein 2 OS=Homo sapiens GN=IGF2BP2 PE=1 SV=2;>sp|Q9Y6M1-1|IF2B2_HUMAN Isofor	6458500	6651900	10579000	7719300	3776900	5143800	6382900	5599800	4587700	4567500	8781000	8174500	2947000	4381600	9489500	10781000	4865800	4569900	4312000	5415000	3237900	5586300	2944400	3331500
F8WCY5;Q14257;H0YL43;A8MXP8	Reticulocalbin-2	RCN2	>tr|F8WCY5|F8WCY5_HUMAN Reticulocalbin-2 OS=Homo sapiens GN=RCN2 PE=2 SV=1;>sp|Q14257|RCN2_HUMAN Reticulocalbin-2 OS=Homo sapiens GN=RCN2 PE=1 SV=1;>tr|H0YL43|H0YL43_HUMAN Reticulocalbin-2 (Fragment) OS=Homo sapiens GN=RCN2 PE=4 SV=1	1	119040	2741500	6688300	9297300	11821000	3897500	3835500	4417600	6992100	6353800	6733700	3457600	3448400	7501000	7689500	5864000	5807200	5731200	2453400	7926200	6980700	6353300	6108100
G3V0I6		OTUD4	>tr|G3V0I6|G3V0I6_HUMAN OTU domain containing 4, isoform CRA_f OS=Homo sapiens GN=OTUD4 PE=2 SV=1	3000300000	2439100000	5605600000	5804900000	1814400000	1844300000	8046400000	8145300000	7230000000	7800000000	8720800000	8985000000	5840400000	5168400000	7202400000	7322500000	6122800000	5918000000	7708800000	7495800000	9865400000	9779400000	7387500000	6929300000
G3V325;C9JU26;P56134;F5H4H2;P56134-2;P56134-3;C9JJT5;P56134-4	ATP synthase subunit f, mitochondrial	PTCD1;ATP5J2	>tr|G3V325|G3V325_HUMAN Pentatricopeptide repeat-containing protein 1, mitochondrial OS=Homo sapiens GN=ATP5J2-PTCD1 PE=4 SV=1;>tr|C9JU26|C9JU26_HUMAN ATP synthase subunit f, mitochondrial OS=Homo sapiens GN=ATP5J2 PE=2 SV=1;>sp|P56134|ATPK_HUMAN ATP synth	1	1	1	3405600	1	1	1	1	1	1	1	1	1	1	1	1	1	1	1	1	1	1	1	1
G3V5Z7;P60900;G3V295;G3V3I1;G3V3U4;B4DXJ9	Proteasome subunit alpha type;Proteasome subunit alpha type-6	PSMA6	>tr|G3V5Z7|G3V5Z7_HUMAN Proteasome subunit alpha type OS=Homo sapiens GN=PSMA6 PE=2 SV=1;>sp|P60900|PSA6_HUMAN Proteasome subunit alpha type-6 OS=Homo sapiens GN=PSMA6 PE=1 SV=1;>tr|G3V295|G3V295_HUMAN Proteasome subunit alpha type OS=Homo sapiens GN=PSMA6	1	1678100	1930600	1918900	1828100	1779500	2386000	2541600	1963300	1634000	2817800	2320600	4844600	2595400	3737000	4863100	2045200	1652800	1	1	2021700	1425800	3387200	2306000
G3XAD8;P31948;F5H783;F5GXD8;F5H0T1	Stress-induced-phosphoprotein 1	STIP1	>tr|G3XAD8|G3XAD8_HUMAN Stress-induced-phosphoprotein 1 OS=Homo sapiens GN=STIP1 PE=2 SV=1;>sp|P31948|STIP1_HUMAN Stress-induced-phosphoprotein 1 OS=Homo sapiens GN=STIP1 PE=1 SV=1;>tr|F5H783|F5H783_HUMAN Stress-induced-phosphoprotein 1 OS=Homo sapiens GN=	2849900	10028000	1773300	5952600	1283800	1776700	738430	915430	1	1	691830	601760	1721300	2127300	1	692990	937990	1015600	1	1	804660	779800	3189700	2648200
G8JLB6;P31943;E9PCY7;D6RBM0;D6RIU0;D6RIT2;D6RIH9;D6RJ04;D6RDU3;D6RFM3;D6R9T0;D6RAM1;E7EQJ0;E7EN40;H0YB39;E5RGV0;D6RDL0;D6RF17;H0YBD7;H0YBG7;E5RGH4;F5GZT4;H0YAQ2;D6R9D3;E5RJ94;Q9NQA5;H7C2J6	Heterogeneous nuclear ribonucleoprotein H;Heterogeneous nuclear ribonucleoprotein H, N-terminally processed	HNRNPH1	>tr|G8JLB6|G8JLB6_HUMAN Heterogeneous nuclear ribonucleoprotein H OS=Homo sapiens GN=HNRNPH1 PE=2 SV=1;>sp|P31943|HNRH1_HUMAN Heterogeneous nuclear ribonucleoprotein H OS=Homo sapiens GN=HNRNPH1 PE=1 SV=4;>tr|E9PCY7|E9PCY7_HUMAN Heterogeneous nuclear ribon	331370000	311000000	422240000	408530000	270110000	260940000	498840000	489740000	369630000	431720000	421320000	424800000	299800000	314040000	372360000	384100000	334520000	360670000	366790000	345070000	430940000	395830000	313490000	327260000
H0Y7A7;E7ETZ0;P62158;E7EMB3;G3V479;M0QZ52;F8WBR5;Q96HY3;G3V361;G3V226	Calmodulin	CALM2;CALM1	>tr|H0Y7A7|H0Y7A7_HUMAN Calmodulin (Fragment) OS=Homo sapiens GN=CALM2 PE=2 SV=1;>tr|E7ETZ0|E7ETZ0_HUMAN Calmodulin OS=Homo sapiens GN=CALM1 PE=2 SV=1;>sp|P62158|CALM_HUMAN Calmodulin OS=Homo sapiens GN=CALM1 PE=1 SV=2;>tr|E7EMB3|E7EMB3_HUMAN Calmodulin OS	137360000	118120000	104710000	90211000	72906000	56092000	66204000	57586000	60238000	24515000	53681000	43009000	54013000	42974000	52239000	54658000	41275000	40876000	59611000	43177000	59659000	57827000	38309000	30876000
H0Y8C2;Q6P5R6;C9JYQ9	60S ribosomal protein L22-like 1	RPL22L1	>tr|H0Y8C2|H0Y8C2_HUMAN 60S ribosomal protein L22-like 1 (Fragment) OS=Homo sapiens GN=RPL22L1 PE=2 SV=1;>sp|Q6P5R6|RL22L_HUMAN 60S ribosomal protein L22-like 1 OS=Homo sapiens GN=RPL22L1 PE=1 SV=2;>tr|C9JYQ9|C9JYQ9_HUMAN 60S ribosomal protein L22-like 1 O	672130000	659580000	80372000	79113000	102400000	94070000	87095000	96117000	101430000	115230000	106370000	120050000	313500000	318550000	131220000	106390000	273050000	278970000	141300000	146370000	60342000	73595000	115150000	127340000
H0YMV8;Q71UM5;C9JLI6	40S ribosomal protein S27;40S ribosomal protein S27-like	RPS27L	>tr|H0YMV8|H0YMV8_HUMAN 40S ribosomal protein S27 OS=Homo sapiens GN=RPS27L PE=2 SV=1;>sp|Q71UM5|RS27L_HUMAN 40S ribosomal protein S27-like OS=Homo sapiens GN=RPS27L PE=1 SV=3;>tr|C9JLI6|C9JLI6_HUMAN 40S ribosomal protein S27 OS=Homo sapiens GN=RPS27L PE=2	102640000	131440000	8951500	8506400	12371000	12126000	3700800	5931400	4807300	3585500	7338600	4021000	49048000	27077000	4465000	3843700	6000800	12909000	1	11594000	8837200	7223200	9578100	8086300
H3BPE7;P35637;P35637-2;Q92804;Q92804-2;K7EPT6	RNA-binding protein FUS	FUS	>tr|H3BPE7|H3BPE7_HUMAN RNA-binding protein FUS OS=Homo sapiens GN=FUS PE=2 SV=1;>sp|P35637|FUS_HUMAN RNA-binding protein FUS OS=Homo sapiens GN=FUS PE=1 SV=1;>sp|P35637-2|FUS_HUMAN Isoform Short of RNA-binding protein FUS OS=Homo sapiens GN=FUS	10067000	10104000	4852600	4032600	2215500	2927900	6238900	4983700	4500400	3491800	3608100	3796500	87703000	72015000	2510600	2358500	4439400	4026300	3028600	2154700	10197000	2242500	5732800	5577000
H7BYM6;P17096-3;P17096	High mobility group protein HMG-I/HMG-Y	HMGA1	>tr|H7BYM6|H7BYM6_HUMAN High mobility group protein HMG-I/HMG-Y OS=Homo sapiens GN=HMGA1 PE=2 SV=1;>sp|P17096-3|HMGA1_HUMAN Isoform HMG-R of High mobility group protein HMG-I/HMG-Y OS=Homo sapiens GN=HMGA1;>sp|P17096|HMGA1_HUMAN High mobility group protein	10386000	10150000	5249400	6851700	6536400	8641600	7079900	5932400	8287900	8447100	4880500	4523500	6992300	5529300	9812900	9342800	7427300	8515400	4316700	1	10098000	6261400	6713100	4880300
H7C2Q8;Q99848	Probable rRNA-processing protein EBP2	EBNA1BP2	>tr|H7C2Q8|H7C2Q8_HUMAN EBNA1 binding protein 2, isoform CRA_d OS=Homo sapiens GN=EBNA1BP2 PE=2 SV=1;>sp|Q99848|EBP2_HUMAN Probable rRNA-processing protein EBP2 OS=Homo sapiens GN=EBNA1BP2 PE=1 SV=2	13717000	4707600	1	1	1365700	1417700	1	1	1069200	1	1	1	3692800	5106700	1	1	1	3183400	1	1	1	3990100	1	1
H7C586		C3orf67	>tr|H7C586|H7C586_HUMAN Uncharacterized protein C3orf67 (Fragment) OS=Homo sapiens GN=C3orf67 PE=4 SV=1	110210000	135650000	192780000	180730000	167620000	192050000	162400000	118570000	106980000	113510000	61521000	49548000	136490000	122770000	88905000	96591000	48440000	65036000	185160000	171280000	82151000	86334000	197450000	245590000
I3L504;P63241-2;P63241;I3L397;Q6IS14;Q9GZV4;C9J4W5;C9J7B5;F8WCJ1	Eukaryotic translation initiation factor 5A-1;Eukaryotic translation initiation factor 5A-1-like;Eukaryotic translation initiation factor 5A-2	EIF5A;EIF5AL1;EIF5A2	>tr|I3L504|I3L504_HUMAN Eukaryotic translation initiation factor 5A-1 OS=Homo sapiens GN=EIF5A PE=2 SV=1;>sp|P63241-2|IF5A1_HUMAN Isoform 2 of Eukaryotic translation initiation factor 5A-1 OS=Homo sapiens GN=EIF5A;>sp|P63241|IF5A1_HUMAN Eukaryotic translat	75581000	64000000	48888000	54578000	44461000	40917000	17674000	19912000	15374000	13990000	9780700	12422000	21114000	30328000	24874000	15178000	12096000	10926000	16129000	17212000	22601000	29437000	15767000	14595000
J3KNN5;Q9UJV9;D6RGI7;H0YA06	Probable ATP-dependent RNA helicase DDX41	DDX41	>tr|J3KNN5|J3KNN5_HUMAN Probable ATP-dependent RNA helicase DDX41 (Fragment) OS=Homo sapiens GN=DDX41 PE=2 SV=1;>sp|Q9UJV9|DDX41_HUMAN Probable ATP-dependent RNA helicase DDX41 OS=Homo sapiens GN=DDX41 PE=1 SV=2;>tr|D6RGI7|D6RGI7_HUMAN Probable ATP-depende	2812900	3282800	2789000	2553000	4741300	2413700	4658900	3925900	3603800	4022900	2853600	3124200	3725800	3634000	4974500	5201500	4183400	4662600	4400200	2876800	7322100	3256800	3643100	3295600
J3KNW4;Q14192	Four and a half LIM domains protein 2	FHL2	>tr|J3KNW4|J3KNW4_HUMAN Four and a half LIM domains protein 2 OS=Homo sapiens GN=FHL2 PE=2 SV=1;>sp|Q14192|FHL2_HUMAN Four and a half LIM domains protein 2 OS=Homo sapiens GN=FHL2 PE=1 SV=3	2142100	7576500	20770000	21587000	306050000	309060000	21582000	21308000	30736000	31858000	26298000	26624000	16908000	27459000	28268000	28511000	27954000	35108000	36877000	36745000	37436000	29263000	29439000	30271000
J3KPX7;Q99623;F5GY37;Q99623-2;F5GWA7;F5H3X6;F5H0C5;F5H2D2	Prohibitin-2	PHB2	>tr|J3KPX7|J3KPX7_HUMAN Prohibitin-2 OS=Homo sapiens GN=PHB2 PE=2 SV=1;>sp|Q99623|PHB2_HUMAN Prohibitin-2 OS=Homo sapiens GN=PHB2 PE=1 SV=2;>tr|F5GY37|F5GY37_HUMAN Prohibitin-2 OS=Homo sapiens GN=PHB2 PE=2 SV=1;>sp|Q99623-2|PHB2_HUMAN Isoform 2 of Prohibit	10843000	17218000	12918000	19287000	22831000	28151000	6368000	5567900	5863100	6793200	5161600	5616100	8105100	7500000	6555100	6489300	5093400	5618400	4686600	4928800	6757900	6208700	1	5005600
J3KQE5;B5MDF5;P62826;F5H018;H0YFC6;B4DV51	GTP-binding nuclear protein Ran	RAN	>tr|J3KQE5|J3KQE5_HUMAN GTP-binding nuclear protein Ran (Fragment) OS=Homo sapiens GN=RAN PE=2 SV=1;>tr|B5MDF5|B5MDF5_HUMAN GTP-binding nuclear protein Ran OS=Homo sapiens GN=RAN PE=2 SV=1;>sp|P62826|RAN_HUMAN GTP-binding nuclear protein Ran OS=Homo sapien	44212000	44376000	42779000	44227000	30752000	36126000	6275100	7598600	9555300	8716200	3303400	6340900	39718000	32990000	9406600	8069500	8322700	6278700	5880300	4182600	8489400	9127700	6005400	5466300
J3KQN4;H0Y5B4;H7BZ11;P83881;R4GN19;H0Y3V9;H7BY91	60S ribosomal protein L36a	RPL36A	>tr|J3KQN4|J3KQN4_HUMAN 60S ribosomal protein L36a OS=Homo sapiens GN=RPL36A PE=2 SV=1;>tr|H0Y5B4|H0Y5B4_HUMAN 60S ribosomal protein L36a (Fragment) OS=Homo sapiens GN=RPL36A PE=3 SV=1;>tr|H7BZ11|H7BZ11_HUMAN Protein RPL36A-HNRNPH2 (Fragment) OS=Homo sapie	1301900	1169100	1243700	454430	2474300	1612300	5803100	6344900	17813000	10028000	7492900	7690600	9994200	11384000	4624700	6192900	4742100	5217400	10252000	6675500	8904800	6915000	6897500	11033000
J3KTA4;P17844;B4DLW8;H3BLZ8;Q92841;Q92841-2;Q92841-3;Q92841-1;J3QSF1;C9JMU5;J3QRQ7;J3KRZ1;J3KRX8;J3QR02;J3QRN5	Probable ATP-dependent RNA helicase DDX5	DDX5	>tr|J3KTA4|J3KTA4_HUMAN Probable ATP-dependent RNA helicase DDX5 OS=Homo sapiens GN=DDX5 PE=2 SV=1;>sp|P17844|DDX5_HUMAN Probable ATP-dependent RNA helicase DDX5 OS=Homo sapiens GN=DDX5 PE=1 SV=1;>tr|B4DLW8|B4DLW8_HUMAN Probable ATP-dependent RNA helicase	131670000	123930000	111800000	116010000	142520000	117550000	113250000	112330000	117620000	101500000	94548000	93318000	170840000	154500000	105940000	107760000	116750000	92485000	91139000	94710000	115820000	125840000	98696000	103270000
J3KTL2;Q07955;Q07955-2;Q07955-3;J3KSR8;J3KSW7;J3QQV5	Serine/arginine-rich splicing factor 1	SRSF1	>tr|J3KTL2|J3KTL2_HUMAN Serine/arginine-rich-splicing factor 1 OS=Homo sapiens GN=SRSF1 PE=2 SV=1;>sp|Q07955|SRSF1_HUMAN Serine/arginine-rich splicing factor 1 OS=Homo sapiens GN=SRSF1 PE=1 SV=2;>sp|Q07955-2|SRSF1_HUMAN Isoform ASF-2 of Serine/arginine-ric	51481000	75861000	12130000	14344000	15277000	11842000	16772000	12277000	17799000	19685000	17168000	11036000	21475000	14203000	28564000	37298000	10154000	17346000	8921700	4457200	9209500	2398700	13961000	6816100
J3QK89;Q8IWX8	Calcium homeostasis endoplasmic reticulum protein	CHERP	>tr|J3QK89|J3QK89_HUMAN Calcium homeostasis endoplasmic reticulum protein OS=Homo sapiens GN=CHERP PE=2 SV=1;>sp|Q8IWX8|CHERP_HUMAN Calcium homeostasis endoplasmic reticulum protein OS=Homo sapiens GN=CHERP PE=1 SV=3	123450000	106420000	115930000	117970000	104220000	98172000	157370000	160980000	138290000	154980000	159240000	154470000	112840000	98907000	135170000	151940000	109860000	117050000	155160000	131420000	189620000	187620000	127240000	137510000
J3QQ67;Q07020;H0YHA7;G3V203;F8VWC5;F8VYV2;F8VUA6;F8VXR6	60S ribosomal protein L18	RPL18	>tr|J3QQ67|J3QQ67_HUMAN 60S ribosomal protein L18 (Fragment) OS=Homo sapiens GN=RPL18 PE=3 SV=1;>sp|Q07020|RL18_HUMAN 60S ribosomal protein L18 OS=Homo sapiens GN=RPL18 PE=1 SV=2;>tr|H0YHA7|H0YHA7_HUMAN 60S ribosomal protein L18 (Fragment) OS=Homo sapiens	2192700000	1954600000	164600000	143660000	214340000	206520000	190270000	172470000	162340000	172770000	229900000	212700000	934840000	918680000	286570000	216240000	327970000	378430000	143610000	147990000	222840000	238070000	129460000	113900000
J3QQX2;P52565;J3KTF8;J3KRE2;J3KRY1;P52565-2;J3KS60	Rho GDP-dissociation inhibitor 1	ARHGDIA	>tr|J3QQX2|J3QQX2_HUMAN Rho GDP-dissociation inhibitor 1 OS=Homo sapiens GN=ARHGDIA PE=2 SV=1;>sp|P52565|GDIR1_HUMAN Rho GDP-dissociation inhibitor 1 OS=Homo sapiens GN=ARHGDIA PE=1 SV=3;>tr|J3KTF8|J3KTF8_HUMAN Rho GDP-dissociation inhibitor 1 (Fragment) O	8492400	7119500	2993900	5116000	1	1	1	1	1	1	1	1	3504500	1	1	1	1	1	1	1	1	1	1	1
J3QRS3;O14950;P19105;P24844;J3KTJ1	Myosin regulatory light chain 12B;Myosin regulatory light chain 12A;Myosin regulatory light polypeptide 9	MYL12B;MYL12A;MYL9	>tr|J3QRS3|J3QRS3_HUMAN Myosin regulatory light chain 12A OS=Homo sapiens GN=MYL12A PE=2 SV=1;>sp|O14950|ML12B_HUMAN Myosin regulatory light chain 12B OS=Homo sapiens GN=MYL12B PE=1 SV=2;>sp|P19105|ML12A_HUMAN Myosin regulatory light chain 12A OS=Homo sapi	14236000	1	10071000	9454900	13282000	11512000	1	1	1	1	1	1	1	1	1	1	1	1	1	1	1	1	1	1
K7ELC2;P62841;K7EM56;K7EQJ5;K7EJ78;S4R456	40S ribosomal protein S15	RPS15	>tr|K7ELC2|K7ELC2_HUMAN 40S ribosomal protein S15 OS=Homo sapiens GN=RPS15 PE=2 SV=1;>sp|P62841|RS15_HUMAN 40S ribosomal protein S15 OS=Homo sapiens GN=RPS15 PE=1 SV=2;>tr|K7EM56|K7EM56_HUMAN 40S ribosomal protein S15 OS=Homo sapiens GN=RPS15 PE=3 SV=2;>tr	102700000	108920000	62317000	66605000	84524000	135440000	27446000	19610000	15457000	13406000	13236000	12589000	49328000	74793000	27019000	20075000	20657000	101490000	30155000	31495000	15984000	18498000	14984000	12759000
K7EMS3			>tr|K7EMS3|K7EMS3_HUMAN Keratin, type I cytoskeletal 19 (Fragment) OS=Homo sapiens GN=KRT19 PE=2 SV=1	5782000	1	1	1	1	3195400	1	1	1	1	1	1	1	7632100	1	1091000	1	1	1988800	1604000	3258900	1	1	1
K7ES00;P68431;P84243;Q16695;Q71DI3;K7EK07;B4DEB1;K7EMV3;Q6NXT2;K7EP01	Histone H3.1;Histone H3.3;Histone H3.1t;Histone H3.2;Histone H3;Histone H3.3C	HIST1H3A;H3F3A;HIST3H3;HIST2H3A;H3F3C	>tr|K7ES00|K7ES00_HUMAN Histone H3.3 (Fragment) OS=Homo sapiens GN=H3F3B PE=2 SV=1;>sp|P68431|H31_HUMAN Histone H3.1 OS=Homo sapiens GN=HIST1H3A PE=1 SV=2;>sp|P84243|H33_HUMAN Histone H3.3 OS=Homo sapiens GN=H3F3A PE=1 SV=2;>sp|Q16695|H31T_HUMAN Histone H3	22641000	19872000	20846000	21490000	74294000	64363000	26176000	22477000	77001000	82689000	36533000	37205000	39520000	35485000	23823000	24753000	28794000	27739000	15000000	30571000	67450000	63636000	16160000	22166000
O00231-2;O00231;J3QRY4;J3QS13	26S proteasome non-ATPase regulatory subunit 11	PSMD11	>sp|O00231-2|PSD11_HUMAN Isoform 2 of 26S proteasome non-ATPase regulatory subunit 11 OS=Homo sapiens GN=PSMD11;>sp|O00231|PSD11_HUMAN 26S proteasome non-ATPase regulatory subunit 11 OS=Homo sapiens GN=PSMD11 PE=1 SV=3	58606000	55704000	66101000	75821000	75214000	75458000	34644000	25164000	39597000	41362000	35799000	27724000	42017000	49048000	42424000	44855000	27588000	29760000	35911000	12877000	41516000	46365000	45006000	30244000
O00232;O00232-2	26S proteasome non-ATPase regulatory subunit 12	PSMD12	>sp|O00232|PSD12_HUMAN 26S proteasome non-ATPase regulatory subunit 12 OS=Homo sapiens GN=PSMD12 PE=1 SV=3;>sp|O00232-2|PSD12_HUMAN Isoform 2 of 26S proteasome non-ATPase regulatory subunit 12 OS=Homo sapiens GN=PSMD12	22789000	24362000	26361000	23564000	24537000	34439000	7494500	6899400	10183000	9041500	5243300	1	15998000	23622000	7512800	7155100	11014000	1	1	4617900	5441400	3745900	2966400	7462700
O00268;Q5TBP5	Transcription initiation factor TFIID subunit 4	TAF4	>sp|O00268|TAF4_HUMAN Transcription initiation factor TFIID subunit 4 OS=Homo sapiens GN=TAF4 PE=1 SV=2;>tr|Q5TBP5|Q5TBP5_HUMAN Transcription initiation factor TFIID subunit 4 (Fragment) OS=Homo sapiens GN=TAF4 PE=2 SV=1	6111300	9599300	14636000	16125000	6120500	4833500	16522000	18037000	15111000	13402000	17603000	15525000	9239100	9160100	10323000	9931000	10846000	10524000	13811000	11049000	15891000	19579000	13463000	11942000
O00299	Chloride intracellular channel protein 1	CLIC1	>sp|O00299|CLIC1_HUMAN Chloride intracellular channel protein 1 OS=Homo sapiens GN=CLIC1 PE=1 SV=4	15290000	2942400	2961000	6550100	4309400	3081000	1419400	1	1	277140	1854100	1	1780500	5016200	1	192020	1	1	1	1	1	243490	2831900000	399690000
O00425	Insulin-like growth factor 2 mRNA-binding protein 3	IGF2BP3	>sp|O00425|IF2B3_HUMAN Insulin-like growth factor 2 mRNA-binding protein 3 OS=Homo sapiens GN=IGF2BP3 PE=1 SV=2	2766500	1942400	5929200	1760800	2284000	1	1	1	2007700	1271600	1	1	2290900	1	1385800	1152400	1322700	1408800	1	1	1	1	1	1
O00487	26S proteasome non-ATPase regulatory subunit 14	PSMD14	>sp|O00487|PSDE_HUMAN 26S proteasome non-ATPase regulatory subunit 14 OS=Homo sapiens GN=PSMD14 PE=1 SV=1	9682300	14431000	16733000	21998000	29572000	24923000	10352000	15798000	13422000	12612000	11753000	9024000	11575000	14757000	17057000	17255000	11791000	10997000	13945000	11462000	14562000	10014000	14107000	12976000
O00571;O00571-2;O15523;B4DXX7;B4E3C4;C9J081;C9J8G5;B4DLA0;Q9NQI0;Q9NQI0-4;Q9NQI0-2;Q9NQI0-3;D6RCM4;H0Y960	ATP-dependent RNA helicase DDX3X;ATP-dependent RNA helicase DDX3Y	DDX3X;DDX3Y	>sp|O00571|DDX3X_HUMAN ATP-dependent RNA helicase DDX3X OS=Homo sapiens GN=DDX3X PE=1 SV=3;>sp|O00571-2|DDX3X_HUMAN Isoform 2 of ATP-dependent RNA helicase DDX3X OS=Homo sapiens GN=DDX3X;>sp|O15523|DDX3Y_HUMAN ATP-dependent RNA helicase DDX3Y OS=Homo sapie	163830000	199680000	181490000	164320000	183900000	177740000	197410000	194570000	242900000	240640000	171040000	175190000	328120000	311040000	194560000	202570000	174510000	173950000	169180000	198070000	259090000	260400000	222040000	225760000
O14744;O14744-2;G3V5W5;B4DX49;B4DV00;A8MTP3;H0YJX6;G3V580;G3V5L5;G3V2X6;C9JSX3;G3V2L6;H7BZ44;H0YJD3;H0YJ77;G3V5T6;G3V2F5;H0YJY6;G3V507	Protein arginine N-methyltransferase 5;Protein arginine N-methyltransferase 5, N-terminally processed	PRMT5	>sp|O14744|ANM5_HUMAN Protein arginine N-methyltransferase 5 OS=Homo sapiens GN=PRMT5 PE=1 SV=4;>sp|O14744-2|ANM5_HUMAN Isoform 2 of Protein arginine N-methyltransferase 5 OS=Homo sapiens GN=PRMT5;>tr|G3V5W5|G3V5W5_HUMAN Protein arginine N-methyltransferas	6766400000	7187700000	9910600000	9657500000	4849400000	4739800000	12016000000	10960000000	13623000000	13603000000	11312000000	10980000000	7681800000	7921600000	10057000000	10192000000	9551000000	9920400000	17160000000	17540000000	13487000000	13818000000	13480000000	13306000000
O15042;O15042-2;E7ET15;O15042-3;C9JB80;H0Y8D9;E7EW00;H7C4V2;C9J5L1;C9JDJ7;U3KPT1	U2 snRNP-associated SURP motif-containing protein	U2SURP	>sp|O15042|SR140_HUMAN U2 snRNP-associated SURP motif-containing protein OS=Homo sapiens GN=U2SURP PE=1 SV=2;>sp|O15042-2|SR140_HUMAN Isoform 2 of U2 snRNP-associated SURP motif-containing protein OS=Homo sapiens GN=U2SURP;>tr|E7ET15|E7ET15_HUMAN U2 snRNP-	51779000	88421000	97143000	99357000	67179000	64875000	128600000	144180000	130170000	125050000	131640000	138800000	77183000	90923000	126090000	121250000	100730000	97947000	119260000	130670000	167280000	178230000	106590000	112240000
O15143;C9J6C8;C9JFG9;C9JQM8;C9JEY1;C9J4Z7;C9K057;C9JBJ7	Actin-related protein 2/3 complex subunit 1B	ARPC1B	>sp|O15143|ARC1B_HUMAN Actin-related protein 2/3 complex subunit 1B OS=Homo sapiens GN=ARPC1B PE=1 SV=3	4527900	5588900	8978800	7365000	3584900	2345700	7885300	8402800	5709400	8908600	7306000	4956300	6313700	4789200	7720400	4069000	3230900	3839800	8754300	9888200	12352000	13981000	1	5593800
O15294;O15294-3;O15294-2;O15294-4;C9JZL3;H7C2T7	UDP-N-acetylglucosamine--peptide N-acetylglucosaminyltransferase 110 kDa subunit	OGT	>sp|O15294|OGT1_HUMAN UDP-N-acetylglucosamine--peptide N-acetylglucosaminyltransferase 110 kDa subunit OS=Homo sapiens GN=OGT PE=1 SV=3;>sp|O15294-3|OGT1_HUMAN Isoform 1 of UDP-N-acetylglucosamine--peptide N-acetylglucosaminyltransferase 110 kDa subunit OS	8153400	4477900	9091200	14390000	4833800	4914500	9373200	7000900	8822100	8154300	6161900	5607400	6963700	6367900	9238500	7980100	1864000	2203200	9079000	3396400	9104500	9349500	8042300	8693100
O15371;B4DVY1;B0QYA5;B0QYA3;B0QYA7;B0QYA6;B0QYA4;B0QYA8	Eukaryotic translation initiation factor 3 subunit D	EIF3D	>sp|O15371|EIF3D_HUMAN Eukaryotic translation initiation factor 3 subunit D OS=Homo sapiens GN=EIF3D PE=1 SV=1;>tr|B4DVY1|B4DVY1_HUMAN Eukaryotic translation initiation factor 3 subunit D OS=Homo sapiens GN=EIF3D PE=2 SV=1	89741000	110880000	119310000	127260000	99942000	97715000	107270000	74061000	100650000	84211000	102850000	76034000	132680000	83311000	112580000	111750000	86214000	95035000	63462000	68937000	106050000	82108000	71508000	120170000
O15397;O15397-2;H0YH64;F5H2I3;F5GXT5;F5H292	Importin-8	IPO8	>sp|O15397|IPO8_HUMAN Importin-8 OS=Homo sapiens GN=IPO8 PE=1 SV=2;>sp|O15397-2|IPO8_HUMAN Isoform 2 of Importin-8 OS=Homo sapiens GN=IPO8	46332000	32960000	47855000	47181000	44261000	42864000	62407000	66187000	62692000	50230000	59417000	52358000	75457000	69434000	89725000	81490000	78566000	72205000	35299000	39871000	68189000	61371000	43392000	54161000
O15479;Q9UBF1;P43366;Q96LZ2;O15481	Melanoma-associated antigen B2	MAGEB2	>sp|O15479|MAGB2_HUMAN Melanoma-associated antigen B2 OS=Homo sapiens GN=MAGEB2 PE=1 SV=3	23335000	5681100	7305900	6849200	14641000	18307000	4102500	4463700	4487000	3104900	3455900	3041100	15856000	11598000	9305800	4597200	4722900	9647400	4060400	3400600	2902800	4357000	2866000	2683400
O43143;Q14562;F5H658;O60231	Putative pre-mRNA-splicing factor ATP-dependent RNA helicase DHX15	DHX15	>sp|O43143|DHX15_HUMAN Putative pre-mRNA-splicing factor ATP-dependent RNA helicase DHX15 OS=Homo sapiens GN=DHX15 PE=1 SV=2	152190000	172810000	162230000	152360000	110610000	122940000	246930000	227540000	170440000	183050000	190240000	184520000	169020000	151330000	160350000	181390000	145560000	140250000	152350000	164350000	208820000	233840000	131060000	141610000
O43175;Q5SZU1	D-3-phosphoglycerate dehydrogenase	PHGDH	>sp|O43175|SERA_HUMAN D-3-phosphoglycerate dehydrogenase OS=Homo sapiens GN=PHGDH PE=1 SV=4;>tr|Q5SZU1|Q5SZU1_HUMAN D-3-phosphoglycerate dehydrogenase OS=Homo sapiens GN=PHGDH PE=2 SV=1	13103000	9034500	7611200	9487900	26987000	65937000	3642200	24532000	1	1	33737000	23748000	7081800	6081800	1	4112600	28857000	22803000	29127000	1	14911000	17999000	1	1
O43242;B4DT72;H0YGV8	26S proteasome non-ATPase regulatory subunit 3	PSMD3	>sp|O43242|PSMD3_HUMAN 26S proteasome non-ATPase regulatory subunit 3 OS=Homo sapiens GN=PSMD3 PE=1 SV=2;>tr|B4DT72|B4DT72_HUMAN 26S proteasome non-ATPase regulatory subunit 3 OS=Homo sapiens GN=PSMD3 PE=2 SV=1	29798000	27408000	36284000	30425000	58751000	54627000	18725000	21861000	22402000	25878000	14600000	15348000	29751000	27957000	36983000	32104000	19884000	18495000	21091000	20710000	15395000	21519000	19943000	21763000
O43290	U4/U6.U5 tri-snRNP-associated protein 1	SART1	>sp|O43290|SNUT1_HUMAN U4/U6.U5 tri-snRNP-associated protein 1 OS=Homo sapiens GN=SART1 PE=1 SV=1	1	1	1	1	1	1	1	1	1	1	1	1	6195500	1	1	1	1	1	1	1	1	1	1	1
O43318;O43318-2;O43318-3;O43318-4;Q9UG54	Mitogen-activated protein kinase kinase kinase 7	MAP3K7;DKFZp586F0420	>sp|O43318|M3K7_HUMAN Mitogen-activated protein kinase kinase kinase 7 OS=Homo sapiens GN=MAP3K7 PE=1 SV=1;>sp|O43318-2|M3K7_HUMAN Isoform 1A of Mitogen-activated protein kinase kinase kinase 7 OS=Homo sapiens GN=MAP3K7;>sp|O43318-3|M3K7_HUMAN Isoform 1C o	57940000	36430000	88636000	110510000	53974000	62446000	122270000	124840000	122490000	125720000	138840000	151180000	70990000	82668000	85417000	104490000	100510000	106130000	102260000	84857000	129190000	123000000	110080000	127130000
O43324;C9J1V9;D6RBD7;O43324-2;H0YAL7;D6RCQ0	Eukaryotic translation elongation factor 1 epsilon-1	EEF1E1	>sp|O43324|MCA3_HUMAN Eukaryotic translation elongation factor 1 epsilon-1 OS=Homo sapiens GN=EEF1E1 PE=1 SV=1;>tr|C9J1V9|C9J1V9_HUMAN HCG2043275 OS=Homo sapiens GN=hCG_2043275 PE=4 SV=2;>tr|D6RBD7|D6RBD7_HUMAN Eukaryotic translation elongation factor 1 ep	1	1	1	1	1	5454700	1	1	1	1	1	1	1	1	1	1	1	1	1	1	1	1	1	1
O43399-7;O43399-5;O43399-3;O43399;O43399-4;O43399-2;O43399-6	Tumor protein D54	TPD52L2	>sp|O43399-7|TPD54_HUMAN Isoform 7 of Tumor protein D54 OS=Homo sapiens GN=TPD52L2;>sp|O43399-5|TPD54_HUMAN Isoform 5 of Tumor protein D54 OS=Homo sapiens GN=TPD52L2;>sp|O43399-3|TPD54_HUMAN Isoform 3 of Tumor protein D54 OS=Homo sapiens GN=TPD52L2;>sp|O43	3767800	1	1	1	1	1	1	1	1	1	1	1	1	1	1	1	1	1	1	1	1	1	1	1
O43707;O43707-2;F5GXS2;O43707-3;H7C144;P12814-4;P12814-3;P12814;P12814-2;H9KV75;H7C5W8;H0YJW3;H0YJ11;K7EJH8;G3V2W4	Alpha-actinin-4	ACTN4	>sp|O43707|ACTN4_HUMAN Alpha-actinin-4 OS=Homo sapiens GN=ACTN4 PE=1 SV=2;>sp|O43707-2|ACTN4_HUMAN Isoform ACTN4ISO of Alpha-actinin-4 OS=Homo sapiens GN=ACTN4;>tr|F5GXS2|F5GXS2_HUMAN Alpha-actinin-4 OS=Homo sapiens GN=ACTN4 PE=2 SV=1;>sp|O43707-3|ACTN4_HU	10446000	12786000	15076000	13813000	11055000	3472700	1	7282100	1361300	1	1	5373700	2155500	1782000	5900700	1	1	1	1	1	6851300	3726700	12428000	12492000
O43809;H3BND3;H3BV41	Cleavage and polyadenylation specificity factor subunit 5	NUDT21	>sp|O43809|CPSF5_HUMAN Cleavage and polyadenylation specificity factor subunit 5 OS=Homo sapiens GN=NUDT21 PE=1 SV=1;>tr|H3BND3|H3BND3_HUMAN Cleavage and polyadenylation-specificity factor subunit 5 (Fragment) OS=Homo sapiens GN=NUDT21 PE=2 SV=1	107370000	93749000	115360000	116780000	98089000	77363000	90998000	80038000	71005000	68551000	71134000	76926000	89586000	87073000	84374000	69089000	57515000	50439000	82112000	79668000	87137000	96283000	76597000	73864000
O43852-3;O43852;O43852-5;O43852-6;O43852-4;O43852-2;O43852-10;O43852-11;O43852-9;O43852-14;O43852-13;O43852-8;O43852-15;O43852-7;H0Y875;O43852-12	Calumenin	CALU	>sp|O43852-3|CALU_HUMAN Isoform 3 of Calumenin OS=Homo sapiens GN=CALU;>sp|O43852|CALU_HUMAN Calumenin OS=Homo sapiens GN=CALU PE=1 SV=2;>sp|O43852-5|CALU_HUMAN Isoform 5 of Calumenin OS=Homo sapiens GN=CALU;>sp|O43852-6|CALU_HUMAN Isoform 6 of Calumenin O	22840000	17058000	30974000	38232000	56802000	60416000	18314000	21335000	22159000	18603000	20814000	22209000	27450000	20904000	39982000	18284000	20953000	16422000	15593000	13457000	29502000	23678000	12731000	10526000
O60506;O60506-3;O60506-2;O60506-4;O60506-5;F6UXX1	Heterogeneous nuclear ribonucleoprotein Q	SYNCRIP	>sp|O60506|HNRPQ_HUMAN Heterogeneous nuclear ribonucleoprotein Q OS=Homo sapiens GN=SYNCRIP PE=1 SV=2;>sp|O60506-3|HNRPQ_HUMAN Isoform 3 of Heterogeneous nuclear ribonucleoprotein Q OS=Homo sapiens GN=SYNCRIP;>sp|O60506-2|HNRPQ_HUMAN Isoform 2 of Heterogen	218330000	231510000	338480000	307220000	262660000	246100000	197780000	201200000	199100000	184040000	197180000	187190000	182190000	180670000	175730000	173250000	173090000	172140000	156920000	156760000	93517000	114730000	134970000	118780000
O60783	28S ribosomal protein S14, mitochondrial	MRPS14	>sp|O60783|RT14_HUMAN 28S ribosomal protein S14, mitochondrial OS=Homo sapiens GN=MRPS14 PE=1 SV=1	1	1	1	1	1	1	1	1	1	1	1	1	1	1	1	1	1	1	1	1	1	1	1	1
O60825;B0FLL2;O60825-2;B4DY91;B4DI16;P16118;B4DUN5	6-phosphofructo-2-kinase/fructose-2,6-bisphosphatase 2;6-phosphofructo-2-kinase;Fructose-2,6-bisphosphatase	PFKFB2	>sp|O60825|F262_HUMAN 6-phosphofructo-2-kinase/fructose-2,6-bisphosphatase 2 OS=Homo sapiens GN=PFKFB2 PE=1 SV=2;>tr|B0FLL2|B0FLL2_HUMAN 6-phosphofructo-2-kinase/fructose-2, 6-bisphosphatase 2 transcript variant 3 OS=Homo sapiens GN=PFKFB2 PE=2 SV=1;>sp|O6	1	5749900	11472000	10419000	7899700	7112100	13644000	13169000	12667000	14520000	11513000	15399000	8582000	7356000	15382000	12851000	11712000	11453000	11623000	12861000	22256000	21678000	13874000	15649000
O60832;O60832-2;C9IYT0;H7C0M1;H7C2Q9;H7BZF2	H/ACA ribonucleoprotein complex subunit 4	DKC1	>sp|O60832|DKC1_HUMAN H/ACA ribonucleoprotein complex subunit 4 OS=Homo sapiens GN=DKC1 PE=1 SV=3;>sp|O60832-2|DKC1_HUMAN Isoform 3 of H/ACA ribonucleoprotein complex subunit 4 OS=Homo sapiens GN=DKC1;>tr|C9IYT0|C9IYT0_HUMAN H/ACA ribonucleoprotein complex	10940000	14164000	1	1	2219400	1	1	1	1	1	3420000	3327000	3762700	3554900	1	1	1	1	1	1	1	1	1	1
O60841	Eukaryotic translation initiation factor 5B	EIF5B	>sp|O60841|IF2P_HUMAN Eukaryotic translation initiation factor 5B OS=Homo sapiens GN=EIF5B PE=1 SV=4	15487000	11178000	3901900	4374700	6238500	3505200	3433400	3638500	7152800	10917000	5267900	1	7477800	10039000	5484000	5760600	10726000	16310000	1	14983000	3691400	4032400	6095700	12936000
O75083;O75083-3;D6RD66	WD repeat-containing protein 1	WDR1	>sp|O75083|WDR1_HUMAN WD repeat-containing protein 1 OS=Homo sapiens GN=WDR1 PE=1 SV=4;>sp|O75083-3|WDR1_HUMAN Isoform 2 of WD repeat-containing protein 1 OS=Homo sapiens GN=WDR1	33503000	23000000	24586000	25620000	5969500	5408200	17174000	18284000	14024000	16219000	15948000	14852000	12250000	9833300	15245000	16138000	9082400	7898200	28865000	22866000	19191000	15448000	11614000	13063000
O75369-8;O75369;O75369-9;O75369-2;O75369-3;O75369-6;O75369-4;O75369-5;O75369-7;E7EN95	Filamin-B	FLNB	>sp|O75369-8|FLNB_HUMAN Isoform 8 of Filamin-B OS=Homo sapiens GN=FLNB;>sp|O75369|FLNB_HUMAN Filamin-B OS=Homo sapiens GN=FLNB PE=1 SV=2;>sp|O75369-9|FLNB_HUMAN Isoform 9 of Filamin-B OS=Homo sapiens GN=FLNB;>sp|O75369-2|FLNB_HUMAN Isoform 2 of Filamin-B O	2605400	1	2761000	2250800	28832000	39784000	1526500	2970600	1	1	1764900	1294500	2163700	1	2407900	942990	1536800	1285400	1	1	1568600	2590900	1	959660
O75533;H7C341;B4DGZ4;O75533-2;F8WC19	Splicing factor 3B subunit 1	SF3B1	>sp|O75533|SF3B1_HUMAN Splicing factor 3B subunit 1 OS=Homo sapiens GN=SF3B1 PE=1 SV=3	164690000	185470000	202810000	220870000	172960000	170770000	290400000	285790000	266030000	304380000	302890000	327590000	221770000	218520000	281530000	247150000	209230000	219960000	228220000	220210000	360210000	347450000	197280000	189760000
O75643;B4E0P5;C9JAQ9;O75643-2	U5 small nuclear ribonucleoprotein 200 kDa helicase	SNRNP200	>sp|O75643|U520_HUMAN U5 small nuclear ribonucleoprotein 200 kDa helicase OS=Homo sapiens GN=SNRNP200 PE=1 SV=2;>tr|B4E0P5|B4E0P5_HUMAN U5 small nuclear ribonucleoprotein 200 kDa helicase OS=Homo sapiens GN=SNRNP200 PE=2 SV=1	23981000	18174000	13675000	12086000	17344000	22825000	8225900	6896700	1	6360100	6809000	7762100	14478000	12847000	10006000	9398600	13110000	10862000	1	1	8499100	12183000	1	1
O75688;O75688-4;C9JIR6;B8ZZF0;O75688-5;O75688-3	Protein phosphatase 1B	PPM1B	>sp|O75688|PPM1B_HUMAN Protein phosphatase 1B OS=Homo sapiens GN=PPM1B PE=1 SV=1;>sp|O75688-4|PPM1B_HUMAN Isoform 4 of Protein phosphatase 1B OS=Homo sapiens GN=PPM1B;>tr|C9JIR6|C9JIR6_HUMAN Protein phosphatase 1B (Fragment) OS=Homo sapiens GN=PPM1B PE=2 S	183290000	141350000	264070000	276530000	176260000	187530000	455600000	463070000	407100000	425950000	413990000	423720000	249500000	300720000	338120000	409770000	388100000	368680000	448380000	456710000	483810000	497550000	344650000	358070000
O75821;K7ENA8;K7EL20;K7ER90;K7EP16	Eukaryotic translation initiation factor 3 subunit G	EIF3G	>sp|O75821|EIF3G_HUMAN Eukaryotic translation initiation factor 3 subunit G OS=Homo sapiens GN=EIF3G PE=1 SV=2;>tr|K7ENA8|K7ENA8_HUMAN Eukaryotic translation initiation factor 3 subunit G (Fragment) OS=Homo sapiens GN=EIF3G PE=2 SV=1;>tr|K7EL20|K7EL20_HUMA	32465000	12044000	40713000	39807000	39566000	35324000	27942000	35698000	32865000	36358000	37393000	41713000	35959000	35677000	37804000	48354000	28576000	32430000	31203000	30473000	42635000	41568000	34757000	38646000
O76021;J3QSV6;I3L3U9;I3L3C4;I3L234	Ribosomal L1 domain-containing protein 1	RSL1D1	>sp|O76021|RL1D1_HUMAN Ribosomal L1 domain-containing protein 1 OS=Homo sapiens GN=RSL1D1 PE=1 SV=3;>tr|J3QSV6|J3QSV6_HUMAN Ribosomal L1 domain-containing protein 1 (Fragment) OS=Homo sapiens GN=RSL1D1 PE=2 SV=1;>tr|I3L3U9|I3L3U9_HUMAN Ribosomal L1 domain-	5793500	7540800	1	1	1	1	1	1	1	1	1	1	1	1	1	1	1	1	1	1	1	1	1	1
O76031	ATP-dependent Clp protease ATP-binding subunit clpX-like, mitochondrial	CLPX	>sp|O76031|CLPX_HUMAN ATP-dependent Clp protease ATP-binding subunit clpX-like, mitochondrial OS=Homo sapiens GN=CLPX PE=1 SV=2	1	1	3654700	4720400	2905100	3110700	3228400	3233800	2706000	3310800	1	2808900	1	2339600	2384500	1	1	1	2335900	1	3006700	1	2930000	2836200
O76094;O76094-2;R4GNC1;D6RDY6	Signal recognition particle 72 kDa protein	SRP72	>sp|O76094|SRP72_HUMAN Signal recognition particle subunit SRP72 OS=Homo sapiens GN=SRP72 PE=1 SV=3;>sp|O76094-2|SRP72_HUMAN Isoform 2 of Signal recognition particle subunit SRP72 OS=Homo sapiens GN=SRP72;>tr|R4GNC1|R4GNC1_HUMAN Signal recognition particle	99749000	113880000	1	1	30266000	27607000	1	1	1	1	4347100	1	18077000	15950000	1	1	18453000	8133300	3391300	2917500	1	1	1	1
O94903;E5RG77;E5RFX7;H0YBG2	Proline synthase co-transcribed bacterial homolog protein	PROSC	>sp|O94903|PROSC_HUMAN Proline synthase co-transcribed bacterial homolog protein OS=Homo sapiens GN=PROSC PE=1 SV=1;>tr|E5RG77|E5RG77_HUMAN Proline synthase co-transcribed bacterial homolog protein (Fragment) OS=Homo sapiens GN=PROSC PE=2 SV=1;>tr|E5RFX7|E	69561000	34042000	36424000	54846000	25198000	26195000	63441000	46380000	55359000	54063000	54385000	55176000	32176000	52456000	58209000	73073000	39471000	43734000	58634000	65869000	62107000	68742000	61039000	71290000
O94992	Protein HEXIM1	HEXIM1	>sp|O94992|HEXI1_HUMAN Protein HEXIM1 OS=Homo sapiens GN=HEXIM1 PE=1 SV=1	1	1	1	1	1	1	1	4892800	1	1	4039000	1	1	1	4537000	1	4246600	4812800	1	1	5497500	1	1	1
O95218;O95218-2	Zinc finger Ran-binding domain-containing protein 2	ZRANB2	>sp|O95218|ZRAB2_HUMAN Zinc finger Ran-binding domain-containing protein 2 OS=Homo sapiens GN=ZRANB2 PE=1 SV=2;>sp|O95218-2|ZRAB2_HUMAN Isoform 2 of Zinc finger Ran-binding domain-containing protein 2 OS=Homo sapiens GN=ZRANB2	1519700	2804400	11326000	10132000	6667300	7526500	10143000	1	8014000	7842500	5978900	6584600	5123100	5171700	8186600	9025000	6276100	4721400	5608900	9306400	9512800	7652000	10662000	5409900
O95425;O95425-2;F5H2Q5;F5GXV0	Supervillin	SVIL	>sp|O95425|SVIL_HUMAN Supervillin OS=Homo sapiens GN=SVIL PE=1 SV=2;>sp|O95425-2|SVIL_HUMAN Isoform 2 of Supervillin OS=Homo sapiens GN=SVIL;>tr|F5H2Q5|F5H2Q5_HUMAN Supervillin OS=Homo sapiens GN=SVIL PE=2 SV=1;>tr|F5GXV0|F5GXV0_HUMAN Supervillin OS=Homo s	4050100	6703800	9176300	11653000	1686400	1	16215000	15681000	18802000	12592000	16267000	14688000	6365100	8342500	10213000	10481000	14152000	10687000	20989000	18109000	16298000	13234000	12390000	12630000
O95816;B4DXE2	BAG family molecular chaperone regulator 2	BAG2	>sp|O95816|BAG2_HUMAN BAG family molecular chaperone regulator 2 OS=Homo sapiens GN=BAG2 PE=1 SV=1;>tr|B4DXE2|B4DXE2_HUMAN BAG family molecular chaperone regulator 2 OS=Homo sapiens GN=BAG2 PE=2 SV=1	3831800	4542200	2780000	2841900	3321000	3483700	3140800	2711200	2429500	2701600	3697300	3121700	2781800	5317500	3282500	3789900	3231200	2824000	2348200	6081500	2832900	7864500	3898700	2248500
P00338-3;P00338;P00338-2;P00338-5;P00338-4;F5GXY2;F5GYU2;F5GXH2;F5H6W8;F5H5J4;F5GZQ4;Q9BYZ2;Q6ZMR3;F5GXU1;F5GWW2;F5GXC7;F5H8H6;P07864;F5H245;G3XAP5;F5H155;F5H5G7	L-lactate dehydrogenase A chain	LDHA	>sp|P00338-3|LDHA_HUMAN Isoform 3 of L-lactate dehydrogenase A chain OS=Homo sapiens GN=LDHA;>sp|P00338|LDHA_HUMAN L-lactate dehydrogenase A chain OS=Homo sapiens GN=LDHA PE=1 SV=2;>sp|P00338-2|LDHA_HUMAN Isoform 2 of L-lactate dehydrogenase A chain OS=Hom	120120000	175710000	111840000	118230000	48236000	61791000	8399600	5788900	8979100	9610700	4356400	3065400	55553000	55373000	11489000	7135100	8771300	3391800	7060600	12032000	13318000	10605000	12865000	7871600
P00558;B7Z7A9;P07205;E7ERH5	Phosphoglycerate kinase 1;Phosphoglycerate kinase	PGK1	>sp|P00558|PGK1_HUMAN Phosphoglycerate kinase 1 OS=Homo sapiens GN=PGK1 PE=1 SV=3;>tr|B7Z7A9|B7Z7A9_HUMAN Phosphoglycerate kinase OS=Homo sapiens GN=PGK1 PE=2 SV=1	86082000	56854000	39713000	30439000	18043000	10341000	2884200	2717700	1	1	1	1	20615000	25399000	2708600	2223900	1	1	1	1	1911100	4089500	1	1
P01040;C9J0E4	Cystatin-A	CSTA	>sp|P01040|CYTA_HUMAN Cystatin-A OS=Homo sapiens GN=CSTA PE=1 SV=1;>tr|C9J0E4|C9J0E4_HUMAN Cystatin-A OS=Homo sapiens GN=CSTA PE=2 SV=1	1828500	2380600	1870000	1970800	1	1731600	7086700	3706300	2336400	3233900	2147900	2361300	2893900	1836100	7678100	4963900	2719200	2550800	7325500	2135200	4676900	3235800	4258100	3847400
P01111	GTPase NRas	NRAS	>sp|P01111|RASN_HUMAN GTPase NRas OS=Homo sapiens GN=NRAS PE=1 SV=1	1	1	1	1	1	1	1	70462000	28991000	43942000	52656000	48698000	32415000	61238000	231920000	213030000	469530000	239760000	40917000	57293000	40425000	52058000	36502000	39003000
P01112;P01112-2	GTPase HRas;GTPase HRas, N-terminally processed	HRAS	>sp|P01112|RASH_HUMAN GTPase HRas OS=Homo sapiens GN=HRAS PE=1 SV=1;>sp|P01112-2|RASH_HUMAN Isoform 2 of GTPase HRas OS=Homo sapiens GN=HRAS	1	1	1	1	1	1	1	1	1	1	1	1	1	14262000	1	1	1	1	1	1	1	1	1	1
P01116-2;P01116;G3V5T7;G3V4K2	GTPase KRas;GTPase KRas, N-terminally processed	KRAS	>sp|P01116-2|RASK_HUMAN Isoform 2B of GTPase KRas OS=Homo sapiens GN=KRAS;>sp|P01116|RASK_HUMAN GTPase KRas OS=Homo sapiens GN=KRAS PE=1 SV=1	810830000	713690000	3140800	9929600	2814600	5533800	8471500000	9034800000	6037900000	5854500000	6883300000	7204400000	22080000000	20591000000	29085000000	34157000000	46939000000	41803000000	5665400000	5288800000	5535700000	6329700000	4263300000	4546700000
P01621	Ig kappa chain V-III region NG9		>sp|P01621|KV303_HUMAN Ig kappa chain V-III region NG9 (Fragment) OS=Homo sapiens PE=1 SV=1	1	1	1	1	3056300	1	1	1	13346000	7747100	1	1	1	3319300	1	1	1	1	11001000	1	1	1	9186900	9586200
P01859	Ig gamma-2 chain C region	IGHG2	>sp|P01859|IGHG2_HUMAN Ig gamma-2 chain C region OS=Homo sapiens GN=IGHG2 PE=1 SV=2	37529000	30300000	56431000	61901000	50189000	70190000	57554000	57948000	431040000	542440000	117880000	122030000	212760000	183370000	85453000	96743000	242350000	305770000	949340000	920660000	125610000	130660000	497800000	451790000
P01860	Ig gamma-3 chain C region	IGHG3	>sp|P01860|IGHG3_HUMAN Ig gamma-3 chain C region OS=Homo sapiens GN=IGHG3 PE=1 SV=2	1	1	1	1	1	879060	1	1	3655900	1	1	1	1	1	806150	1	1	1	1	30596000	687750	1	1	1
P02452	Collagen alpha-1(I) chain	COL1A1	>sp|P02452|CO1A1_HUMAN Collagen alpha-1(I) chain OS=Homo sapiens GN=COL1A1 PE=1 SV=5	1	1	1	1	1	1	1	1	4747700	4470800	1	1	2496100	1	1	1	2590500	1	1	1	1	1659500	1	4056900
P02545;P02545-3;P02545-6;P02545-2;P02545-4;P02545-5;Q5TCI8;H0YAB0	Prelamin-A/C;Lamin-A/C	LMNA	>sp|P02545|LMNA_HUMAN Prelamin-A/C OS=Homo sapiens GN=LMNA PE=1 SV=1;>sp|P02545-3|LMNA_HUMAN Isoform ADelta10 of Prelamin-A/C OS=Homo sapiens GN=LMNA;>sp|P02545-6|LMNA_HUMAN Isoform 6 of Prelamin-A/C OS=Homo sapiens GN=LMNA;>sp|P02545-2|LMNA_HUMAN Isoform	90989000	93850000	45697000	68580000	357170000	337900000	30580000	11555000	61878000	82841000	33155000	12619000	39249000	70470000	37765000	29080000	43642000	51831000	53688000	103150000	92756000	57963000	50046000	88245000
P02751-15;P02751-7;P02751;P02751-11;P02751-3;P02751-17;P02751-8;P02751-13;P02751-14;P02751-9;F8W7G7;P02751-5;P02751-6;P02751-10;P02751-4;P02751-12;H0Y7Z1	Fibronectin;Anastellin;Ugl-Y1;Ugl-Y2;Ugl-Y3	FN1	>sp|P02751-15|FINC_HUMAN Isoform 15 of Fibronectin OS=Homo sapiens GN=FN1;>sp|P02751-7|FINC_HUMAN Isoform 7 of Fibronectin OS=Homo sapiens GN=FN1;>sp|P02751|FINC_HUMAN Fibronectin OS=Homo sapiens GN=FN1 PE=1 SV=4;>sp|P02751-11|FINC_HUMAN Isoform 11 of Fibr	1	1	1	664410	9715800	13243000	772470	1	977160	1366500	1	1	631190	624330	426820	647140	643470	592840	807170	1022400	1231400	1598100	1068800	954450
P02786;G3V0E5;F5H6B1	Transferrin receptor protein 1;Transferrin receptor protein 1, serum form	TFRC	>sp|P02786|TFR1_HUMAN Transferrin receptor protein 1 OS=Homo sapiens GN=TFRC PE=1 SV=2;>tr|G3V0E5|G3V0E5_HUMAN Transferrin receptor (P90, CD71), isoform CRA_c OS=Homo sapiens GN=TFRC PE=2 SV=1;>tr|F5H6B1|F5H6B1_HUMAN Transferrin receptor protein 1, serum f	1	3002900	1	1	1	1	1	1	1	1	1	1	1	1	1	1	1	1	1	1	1	1	1	1
P02790	Hemopexin	HPX	>sp|P02790|HEMO_HUMAN Hemopexin OS=Homo sapiens GN=HPX PE=1 SV=2	8950900	11075000	8804700	19357000	15899000	17701000	12562000	9660000	23930000	27034000	8378700	9275900	9717800	16349000	1	9146700	11305000	9064500	30125000	53962000	15934000	15746000	33505000	30723000
P04040	Catalase	CAT	>sp|P04040|CATA_HUMAN Catalase OS=Homo sapiens GN=CAT PE=1 SV=3	1	1	1595900	1	1	2417800	1	1	1	1	1	1	1480300	1	1586600	1925000	1	1	1617600	2497800	1492300	2011800	2697100	3278000
P04049;P04049-2;B4E0X2;H7C155;B4E1N6;P10398;H7C560;H7C4S5	RAF proto-oncogene serine/threonine-protein kinase	RAF1	>sp|P04049|RAF1_HUMAN RAF proto-oncogene serine/threonine-protein kinase OS=Homo sapiens GN=RAF1 PE=1 SV=1;>sp|P04049-2|RAF1_HUMAN Isoform 2 of RAF proto-oncogene serine/threonine-protein kinase OS=Homo sapiens GN=RAF1;>tr|B4E0X2|B4E0X2_HUMAN RAF proto-onc	5472200	2731300	4627200	4568900	9062300	7947700	4900800	6020200	8017900	2737000	5668100	4768700	93736000	109600000	207400000	180990000	155150000	152490000	3381400	7358200	5416300	6914400	3758300	2916100
P04075-2;P04075;J3KPS3;H3BQN4;H3BPS8;H3BUH7;H3BU78;H3BR04;H3BMQ8;H3BR68;P09972	Fructose-bisphosphate aldolase A;Fructose-bisphosphate aldolase	ALDOA	>sp|P04075-2|ALDOA_HUMAN Isoform 2 of Fructose-bisphosphate aldolase A OS=Homo sapiens GN=ALDOA;>sp|P04075|ALDOA_HUMAN Fructose-bisphosphate aldolase A OS=Homo sapiens GN=ALDOA PE=1 SV=2;>tr|J3KPS3|J3KPS3_HUMAN Fructose-bisphosphate aldolase OS=Homo sapien	100540000	88531000	108340000	91629000	61199000	66976000	31905000	24496000	20919000	23912000	11529000	15571000	57100000	70783000	28459000	27510000	13478000	18925000	28496000	24600000	22901000	34186000	19712000	24579000
P04080	Cystatin-B	CSTB	>sp|P04080|CYTB_HUMAN Cystatin-B OS=Homo sapiens GN=CSTB PE=1 SV=2	36173000	41601000	28155000	35320000	40741000	36925000	24959000	29973000	35852000	26386000	14373000	12144000	28530000	28934000	15000000	16895000	22207000	24723000	41197000	43588000	20297000	21881000	32586000	31454000
P04083;Q5T3N1;Q5T3N0	Annexin A1;Annexin	ANXA1	>sp|P04083|ANXA1_HUMAN Annexin A1 OS=Homo sapiens GN=ANXA1 PE=1 SV=2;>tr|Q5T3N1|Q5T3N1_HUMAN Annexin (Fragment) OS=Homo sapiens GN=ANXA1 PE=2 SV=1	122050000	101940000	68686000	87357000	19481000	19770000	8052700	6418900	5294900	2799300	2430900	1250500	31034000	37877000	5645600	5577600	2365600	4945000	2467000	2141900	7118200	4817500	5987700	3190600
P04181;P04181-2	Ornithine aminotransferase, mitochondrial;Ornithine aminotransferase, hepatic form;Ornithine aminotransferase, renal form	OAT	>sp|P04181|OAT_HUMAN Ornithine aminotransferase, mitochondrial OS=Homo sapiens GN=OAT PE=1 SV=1;>sp|P04181-2|OAT_HUMAN Isoform 2 of Ornithine aminotransferase, mitochondrial OS=Homo sapiens GN=OAT	11277000	6435600	4576400	7154600	15725000	7148900	4294600	1	2994100	2983100	3401500	1	1	3316400	1	2258900	1	1817400	1	1	4711200	3854800	1	3846600
P04264;CON__P04264	Keratin, type II cytoskeletal 1	KRT1	>sp|P04264|K2C1_HUMAN Keratin, type II cytoskeletal 1 OS=Homo sapiens GN=KRT1 PE=1 SV=6;>P04264 SWISS-PROT:P04264 Tax_Id=9606 Gene_Symbol=KRT1 Keratin, type II cytoskeletal 1	20831000000	21799000000	31462000000	31520000000	30401000000	31939000000	27131000000	27714000000	22561000000	22981000000	22649000000	22689000000	19760000000	20057000000	27254000000	27482000000	21192000000	20693000000	35382000000	38286000000	20676000000	20609000000	58979000000	57917000000
P04350;M0R278;M0R1I1	Tubulin beta-4A chain	TUBB4A	>sp|P04350|TBB4A_HUMAN Tubulin beta-4A chain OS=Homo sapiens GN=TUBB4A PE=1 SV=2	8722500	4828400	3363100	4497600	21395000	14094000	3141300	1	4885300	4510900	5652300	4643800	4486900	11096000	2744300	1	7395200	10806000	10436000	16236000	6459800	8135700	7636900	11742000
P04406;P04406-2;E7EUT5;O14556	Glyceraldehyde-3-phosphate dehydrogenase	GAPDH	>sp|P04406|G3P_HUMAN Glyceraldehyde-3-phosphate dehydrogenase OS=Homo sapiens GN=GAPDH PE=1 SV=3;>sp|P04406-2|G3P_HUMAN Isoform 2 of Glyceraldehyde-3-phosphate dehydrogenase OS=Homo sapiens GN=GAPDH;>tr|E7EUT5|E7EUT5_HUMAN Glyceraldehyde-3-phosphate dehydr	709190000	1056600000	666200000	711580000	438380000	471480000	163510000	182680000	109250000	122890000	106440000	92550000	343300000	370580000	165850000	149540000	103840000	104480000	149050000	143260000	166480000	136270000	185520000	178060000
P04792;F8WE04;C9J3N8	Heat shock protein beta-1	HSPB1	>sp|P04792|HSPB1_HUMAN Heat shock protein beta-1 OS=Homo sapiens GN=HSPB1 PE=1 SV=2;>tr|F8WE04|F8WE04_HUMAN Heat shock protein beta-1 OS=Homo sapiens GN=HSPB1 PE=2 SV=1	89159000	82998000	64048000	78637000	87541000	84818000	16244000	21294000	14646000	12602000	19442000	12502000	49887000	57305000	18150000	19077000	15892000	17955000	16440000	13248000	14298000	14791000	18431000	19309000
P04843;B7Z4L4	Dolichyl-diphosphooligosaccharide--protein glycosyltransferase subunit 1	RPN1	>sp|P04843|RPN1_HUMAN Dolichyl-diphosphooligosaccharide--protein glycosyltransferase subunit 1 OS=Homo sapiens GN=RPN1 PE=1 SV=1;>tr|B7Z4L4|B7Z4L4_HUMAN Dolichyl-diphosphooligosaccharide--protein glycosyltransferase subunit 1 OS=Homo sapiens GN=RPN1 PE=2 S	5288800	2704900	2558300	2538800	2996600	1	1	1	1	1	1	1	1683900	1	1	1	1	1	1	1	1	1	1	1
P04844;P04844-2;Q5JYR7;Q5JYR4;F2Z3K5	Dolichyl-diphosphooligosaccharide--protein glycosyltransferase subunit 2	RPN2	>sp|P04844|RPN2_HUMAN Dolichyl-diphosphooligosaccharide--protein glycosyltransferase subunit 2 OS=Homo sapiens GN=RPN2 PE=1 SV=3;>sp|P04844-2|RPN2_HUMAN Isoform 2 of Dolichyl-diphosphooligosaccharide--protein glycosyltransferase subunit 2 OS=Homo sapiens G	869520	2174600	513530	3302200	2363100	1	1	1	24426000	23920000	23511000	1	1	30688000	32397000	35117000	26121000	27221000	23703000	22752000	20803000	1	51354000	51418000
P04908;Q7L7L0;Q93077	Histone H2A type 1-B/E;Histone H2A type 3;Histone H2A type 1-C	HIST1H2AB;HIST3H2A;HIST1H2AC	>sp|P04908|H2A1B_HUMAN Histone H2A type 1-B/E OS=Homo sapiens GN=HIST1H2AB PE=1 SV=2;>sp|Q7L7L0|H2A3_HUMAN Histone H2A type 3 OS=Homo sapiens GN=HIST3H2A PE=1 SV=3;>sp|Q93077|H2A1C_HUMAN Histone H2A type 1-C OS=Homo sapiens GN=HIST1H2AC PE=1 SV=3	5464200	1	1517300	1526000	8814000	7661800	1	1	13621000	9912300	1940400	2630400	1858300	1522300	1028500	741770	1	2060000	1	1	8818000	4603000	1	1481200
P05089-2;P05089;P05089-3	Arginase-1	ARG1	>sp|P05089-2|ARGI1_HUMAN Isoform 2 of Arginase-1 OS=Homo sapiens GN=ARG1;>sp|P05089|ARGI1_HUMAN Arginase-1 OS=Homo sapiens GN=ARG1 PE=1 SV=2;>sp|P05089-3|ARGI1_HUMAN Isoform 3 of Arginase-1 OS=Homo sapiens GN=ARG1	1	1	1	1	1	9548200	1	1	1	1	1	1	1	1	1	1	1	1	1	1	1	1	1	1
P05109	Protein S100-A8	S100A8	>sp|P05109|S10A8_HUMAN Protein S100-A8 OS=Homo sapiens GN=S100A8 PE=1 SV=1	5725900	5622300	4005800	3727100	4014700	1	9030900	9118000	1	3748500	1	1	3534400	2979100	5172600	5237500	1	1	1	1	4692000	1	4426200	5542800
P05141	ADP/ATP translocase 2	SLC25A5	>sp|P05141|ADT2_HUMAN ADP/ATP translocase 2 OS=Homo sapiens GN=SLC25A5 PE=1 SV=7	403750000	301020000	183300000	216130000	476440000	452690000	147350000	163130000	185630000	167120000	145250000	137220000	187290000	184890000	195250000	197060000	193790000	200330000	156410000	176780000	153100000	168220000	191130000	186090000
P05198;G3V4T5;H0YJS4	Eukaryotic translation initiation factor 2 subunit 1	EIF2S1	>sp|P05198|IF2A_HUMAN Eukaryotic translation initiation factor 2 subunit 1 OS=Homo sapiens GN=EIF2S1 PE=1 SV=3;>tr|G3V4T5|G3V4T5_HUMAN Eukaryotic translation initiation factor 2 subunit 1 (Fragment) OS=Homo sapiens GN=EIF2S1 PE=2 SV=1;>tr|H0YJS4|H0YJS4_HUM	38072000	31345000	124430000	112730000	111710000	113100000	104080000	96396000	112470000	84914000	98988000	80597000	73891000	82401000	135640000	125640000	91395000	61923000	86542000	107240000	104860000	132140000	72910000	97402000
P05386	60S acidic ribosomal protein P1	RPLP1	>sp|P05386|RLA1_HUMAN 60S acidic ribosomal protein P1 OS=Homo sapiens GN=RPLP1 PE=1 SV=1	222200000	193190000	68542000	37561000	77797000	45288000	69825000	43915000	50370000	34119000	38510000	33062000	71704000	54926000	39663000	32193000	20517000	45925000	57980000	59610000	30505000	34394000	30470000	29778000
P05387;H0YDD8	60S acidic ribosomal protein P2	RPLP2	>sp|P05387|RLA2_HUMAN 60S acidic ribosomal protein P2 OS=Homo sapiens GN=RPLP2 PE=1 SV=1;>tr|H0YDD8|H0YDD8_HUMAN 60S acidic ribosomal protein P2 (Fragment) OS=Homo sapiens GN=RPLP2 PE=3 SV=1	3461000000	2682000000	301120000	321190000	497700000	422150000	353600000	396220000	328230000	295330000	548630000	596180000	1155100000	1336700000	452810000	426420000	634320000	616420000	519140000	504070000	404440000	458430000	305430000	277860000
P05388;F8VWS0;Q3B7A4;F8VU65;F8VW21;Q8NHW5;G3V210;F8VRK7;F8VPE8;F8VQY6;F8VZS0;F8VS58;F8VWV4;F8W1K8;F8VYN4	60S acidic ribosomal protein P0;60S acidic ribosomal protein P0-like	RPLP0;RPLP0P6	>sp|P05388|RLA0_HUMAN 60S acidic ribosomal protein P0 OS=Homo sapiens GN=RPLP0 PE=1 SV=1;>tr|F8VWS0|F8VWS0_HUMAN 60S acidic ribosomal protein P0 OS=Homo sapiens GN=RPLP0 PE=2 SV=1;>tr|Q3B7A4|Q3B7A4_HUMAN 60S acidic ribosomal protein P0 OS=Homo sapiens GN=R	2155600000	2003400000	271050000	201210000	323560000	283860000	209770000	201670000	189760000	187620000	278680000	267230000	759590000	663020000	285450000	284320000	470340000	447650000	283000000	265320000	250660000	249480000	164700000	175010000
P05413;S4R371;S4R3A2;P02689	Fatty acid-binding protein, heart	FABP3	>sp|P05413|FABPH_HUMAN Fatty acid-binding protein, heart OS=Homo sapiens GN=FABP3 PE=1 SV=4;>tr|S4R371|S4R371_HUMAN Fatty acid-binding protein, heart (Fragment) OS=Homo sapiens GN=FABP3 PE=3 SV=1;>tr|S4R3A2|S4R3A2_HUMAN Fatty acid-binding protein, heart OS	21107000	25392000	38401000	53113000	71271000	72217000	66997000	72898000	53814000	60631000	72948000	66883000	39009000	42171000	62140000	67858000	71848000	60305000	80051000	47747000	78050000	67881000	61824000	47221000
P05455;E7ERC4;E9PFL9;E9PGX9	Lupus La protein	SSB	>sp|P05455|LA_HUMAN Lupus La protein OS=Homo sapiens GN=SSB PE=1 SV=2	68633000	93517000	5761300	7647100	6194400	8189500	16656000	1	1	1	6292400	2898900	29965000	32688000	3757800	1	9656600	10911000	3262800	3697000	1	1	1	1
P05783;F8VZY9;CON__H-INV:HIT000015463	Keratin, type I cytoskeletal 18	KRT18	>sp|P05783|K1C18_HUMAN Keratin, type I cytoskeletal 18 OS=Homo sapiens GN=KRT18 PE=1 SV=2;>tr|F8VZY9|F8VZY9_HUMAN Keratin, type I cytoskeletal 18 OS=Homo sapiens GN=KRT18 PE=2 SV=1	164420000	235840000	333580000	333190000	1665900000	1844400000	170750000	139530000	150080000	136500000	99763000	103940000	205480000	240100000	141650000	149390000	99783000	105640000	115630000	109260000	152790000	158200000	123880000	141270000
P05787-2;CON__P05787;P05787;F8VUG2;F8W1U3;CON__Q9H552;Q9H552;F8VRG4;F8VP67;CON__H-INV:HIT000016045;F8VQY3;CON__REFSEQ:XP_092267;H0YIB2;P08670;B0YJC4;P41219-2;P17661;P41219;P14136-2;P14136;P14136-3;K7EJU1;B0YJC5;H7C5W5	Keratin, type II cytoskeletal 8	KRT8	>sp|P05787-2|K2C8_HUMAN Isoform 2 of Keratin, type II cytoskeletal 8 OS=Homo sapiens GN=KRT8;>P05787 SWISS-PROT:P05787 Tax_Id=9606 Gene_Symbol=KRT8 Keratin, type II cytoskeletal 8;>sp|P05787|K2C8_HUMAN Keratin, type II cytoskeletal 8 OS=Homo sapiens GN=KRT	786210000	693600000	1115700000	1039400000	5280500000	5206600000	576570000	583750000	578420000	595150000	398550000	412630000	800960000	810980000	561480000	581600000	420550000	438830000	346310000	363080000	444140000	477580000	414800000	456120000
P06310;P06309;P01614;P01617	Ig kappa chain V-II region RPMI 6410;Ig kappa chain V-II region GM607;Ig kappa chain V-II region Cum;Ig kappa chain V-II region TEW		>sp|P06310|KV206_HUMAN Ig kappa chain V-II region RPMI 6410 OS=Homo sapiens PE=4 SV=1;>sp|P06309|KV205_HUMAN Ig kappa chain V-II region GM607 (Fragment) OS=Homo sapiens PE=4 SV=1;>sp|P01614|KV201_HUMAN Ig kappa chain V-II region Cum OS=Homo sapiens PE=1 SV	316770000	299360000	16255000000	87747000	19945000000	24911000	13948000000	5809600000	420160000	1119600000	117150000	499130000	207110000	305740000	18991000000	16201000000	1309200000	1252100000	1590500000	8491500000	13018000000	649060000	1289900000	7401600000
P06454;P06454-2;B8ZZQ6;H7C2N1;B8ZZW7;B8ZZA1	Prothymosin alpha;Thymosin alpha-1	PTMA	>sp|P06454|PTMA_HUMAN Prothymosin alpha OS=Homo sapiens GN=PTMA PE=1 SV=2;>sp|P06454-2|PTMA_HUMAN Isoform 2 of Prothymosin alpha OS=Homo sapiens GN=PTMA;>tr|B8ZZQ6|B8ZZQ6_HUMAN Thymosin alpha-1 OS=Homo sapiens GN=PTMA PE=2 SV=1;>tr|H7C2N1|H7C2N1_HUMAN Thym	915280	904550	12831000	12824000	6104600	6114600	2942600	4452300	2303000	1439200	803060	668610	4748300	5805200	3633600	3600300	942230	846010	2050200	2189500	2548500	4022800	2482000	2547200
P06493;P06493-2;E5RIU6;G3V5T9;Q00526;P24941;P24941-2;E7ESI2;K7ELV5;Q14004;Q9NYV4;Q9NYV4-2;Q14004-2;Q9NYV4-3;J3QSD7;Q00536-2;Q00537;Q00537-2;Q07002-3;Q00536-3;Q00536;F5H6Z0;O94921;O94921-2;Q96Q40;Q96Q40-5;O94921-3;Q96Q40-3;E5RGN0;Q96Q40-4;Q96Q40-2;E7EUK8;P11802;Q00535;H0YAZ9;Q00535-2;K7EJ83;F8VZ51;F8VWX7;F8VTV8;F8VZZ0;B4DNF9;F8VYH9;F8VXD2;G3V317	Cyclin-dependent kinase 1	CDK1	>sp|P06493|CDK1_HUMAN Cyclin-dependent kinase 1 OS=Homo sapiens GN=CDK1 PE=1 SV=3;>sp|P06493-2|CDK1_HUMAN Isoform 2 of Cyclin-dependent kinase 1 OS=Homo sapiens GN=CDK1;>tr|E5RIU6|E5RIU6_HUMAN Cyclin-dependent kinase 1 (Fragment) OS=Homo sapiens GN=CDK1 PE	39123000	44504000	37469000	42781000	96518000	71915000	27678000	26733000	18106000	15775000	21323000	22528000	19023000	21992000	25543000	29394000	22660000	16151000	15205000	16658000	33570000	30247000	17547000	19297000
P06576;F8VPV9;H0YH81;F8W079;F8W0P7;F8VQY0;H0YI37	ATP synthase subunit beta, mitochondrial;ATP synthase subunit beta	ATP5B	>sp|P06576|ATPB_HUMAN ATP synthase subunit beta, mitochondrial OS=Homo sapiens GN=ATP5B PE=1 SV=3;>tr|F8VPV9|F8VPV9_HUMAN ATP synthase subunit beta OS=Homo sapiens GN=ATP5B PE=2 SV=1;>tr|H0YH81|H0YH81_HUMAN ATP synthase subunit beta (Fragment) OS=Homo sapi	122540000	113980000	58350000	97515000	50176000	38780000	12535000	5994400	3704300	1	1	1	42371000	38935000	8091800	17996000	1987200	1562300	2959500	1	4660900	9680200	42087000	1
P06702	Protein S100-A9	S100A9	>sp|P06702|S10A9_HUMAN Protein S100-A9 OS=Homo sapiens GN=S100A9 PE=1 SV=1	1	1	1	1	1	1	1	1	1	1	1	1	1	1	1	1	1	1	1	1	1	1	1	1
P06703;R4GN98	Protein S100-A6	S100A6	>sp|P06703|S10A6_HUMAN Protein S100-A6 OS=Homo sapiens GN=S100A6 PE=1 SV=1;>tr|R4GN98|R4GN98_HUMAN Protein S100-A6 (Fragment) OS=Homo sapiens GN=S100A6 PE=4 SV=1	27020000	19854000	95217000	90410000	47160000	43815000	23459000	21365000	17072000	26639000	12376000	12859000	64697000	66210000	27130000	23357000	18005000	20109000	25596000	24667000	28935000	20974000	29291000	22661000
P06733;P06733-2;K7EM90;P13929;P13929-2;P13929-3;E5RGZ4;K7EKN2;K7EPM1;E5RG95;E5RI09;P09104;B7Z2X9;F5H0C8;F5H1C3;K7ERS8	Alpha-enolase	ENO1	>sp|P06733|ENOA_HUMAN Alpha-enolase OS=Homo sapiens GN=ENO1 PE=1 SV=2;>sp|P06733-2|ENOA_HUMAN Isoform MBP-1 of Alpha-enolase OS=Homo sapiens GN=ENO1	556550000	499010000	473720000	508160000	174970000	231220000	115820000	103700000	54663000	78144000	35274000	49423000	231550000	308740000	53945000	74364000	66906000	58783000	58312000	88405000	101710000	68722000	110920000	74203000
P06744-2;P06744;K7EQ48;CON__Q3ZBD7;K7ESF4	Glucose-6-phosphate isomerase	GPI	>sp|P06744-2|G6PI_HUMAN Isoform 2 of Glucose-6-phosphate isomerase OS=Homo sapiens GN=GPI;>sp|P06744|G6PI_HUMAN Glucose-6-phosphate isomerase OS=Homo sapiens GN=GPI PE=1 SV=4;>tr|K7EQ48|K7EQ48_HUMAN Glucose-6-phosphate isomerase OS=Homo sapiens GN=GPI PE=2	22647000	8965300	14835000	4140700	3252000	3045400	1	1	1	1	1	1	5302100	7621100	1	1	1	1	1	1	1	1	1	1
P06748;P06748-2;P06748-3;E5RGW4;E5RI98	Nucleophosmin	NPM1	>sp|P06748|NPM_HUMAN Nucleophosmin OS=Homo sapiens GN=NPM1 PE=1 SV=2;>sp|P06748-2|NPM_HUMAN Isoform 2 of Nucleophosmin OS=Homo sapiens GN=NPM1;>sp|P06748-3|NPM_HUMAN Isoform 3 of Nucleophosmin OS=Homo sapiens GN=NPM1	114570000	126460000	135640000	125760000	208740000	199600000	89194000	103040000	115500000	139970000	106450000	108390000	123900000	100850000	92080000	99429000	100730000	94129000	56864000	61097000	126370000	134550000	69032000	47001000
P06753-2;P06753-5;Q5VU59;Q5VU58;P06753-3;J3KN67;P06753-4;Q5VU61;D6R904;P06753;Q5VU63;A6NL28;A6NL28-2;D6RFM2		TPM3	>sp|P06753-2|TPM3_HUMAN Isoform 2 of Tropomyosin alpha-3 chain OS=Homo sapiens GN=TPM3;>sp|P06753-5|TPM3_HUMAN Isoform 5 of Tropomyosin alpha-3 chain OS=Homo sapiens GN=TPM3;>tr|Q5VU59|Q5VU59_HUMAN Uncharacterized protein OS=Homo sapiens GN=TPM3 PE=2 SV=1;	36043000	60736000	66472000	61316000	68783000	61512000	42231000	38435000	32214000	33926000	31748000	34050000	32414000	30950000	31779000	33215000	25571000	26070000	33349000	36962000	42771000	44395000	40554000	34035000
P06858	Lipoprotein lipase	LPL	>sp|P06858|LIPL_HUMAN Lipoprotein lipase OS=Homo sapiens GN=LPL PE=1 SV=1	39139000	35997000	52693000	45539000	61294000	60496000	69707000	67811000	48420000	45101000	62870000	53801000	42471000	32100000	52613000	59278000	46541000	53243000	61955000	68248000	71019000	75460000	47182000	46964000
P06899;P23527;P33778;Q16778;Q8N257;Q6DN03;Q6DRA6	Histone H2B type 1-J;Histone H2B type 1-O;Histone H2B type 1-B;Histone H2B type 2-E;Histone H2B type 3-B	HIST1H2BJ;HIST1H2BO;HIST1H2BB;HIST2H2BE;HIST3H2BB	>sp|P06899|H2B1J_HUMAN Histone H2B type 1-J OS=Homo sapiens GN=HIST1H2BJ PE=1 SV=3;>sp|P23527|H2B1O_HUMAN Histone H2B type 1-O OS=Homo sapiens GN=HIST1H2BO PE=1 SV=3;>sp|P33778|H2B1B_HUMAN Histone H2B type 1-B OS=Homo sapiens GN=HIST1H2BB PE=1 SV=2;>sp|Q16	31715000	62645000	104140000	102570000	200290000	296480000	41859000	24514000	314680000	535590000	135410000	119360000	169920000	129910000	94553000	67560000	114480000	138630000	27574000	13064000	404850000	336730000	76671000	80046000
P07195;A8MW50;C9J7H8;F5H793	L-lactate dehydrogenase B chain;L-lactate dehydrogenase	LDHB	>sp|P07195|LDHB_HUMAN L-lactate dehydrogenase B chain OS=Homo sapiens GN=LDHB PE=1 SV=2;>tr|A8MW50|A8MW50_HUMAN L-lactate dehydrogenase (Fragment) OS=Homo sapiens GN=LDHB PE=2 SV=1;>tr|C9J7H8|C9J7H8_HUMAN L-lactate dehydrogenase B chain (Fragment) OS=Homo	151830000	140490000	94707000	96636000	29140000	28577000	19549000	3008100	1	1	1	1	38542000	32665000	27292000	2947700	1	1	16680000	25680000	11858000	18775000	14882000	25024000
P07237;H7BZ94;F5H8J2;H0Y3Z3;I3L398;I3L312;I3L3U6;I3NI03;I3L0S0;I3L4M2;I3L3P5;I3L514;I3L1Y5	Protein disulfide-isomerase	P4HB	>sp|P07237|PDIA1_HUMAN Protein disulfide-isomerase OS=Homo sapiens GN=P4HB PE=1 SV=3;>tr|H7BZ94|H7BZ94_HUMAN Protein disulfide-isomerase OS=Homo sapiens GN=P4HB PE=2 SV=2;>tr|F5H8J2|F5H8J2_HUMAN Uncharacterized protein OS=Homo sapiens GN=P4HB PE=3 SV=1	91097000	99259000	80847000	91604000	49234000	54062000	50644000	61117000	53163000	47431000	40006000	41812000	91306000	83210000	51273000	57360000	37085000	38379000	54873000	54741000	66864000	67650000	33051000	49478000
P07305;P07305-2	Histone H1.0	H1F0	>sp|P07305|H10_HUMAN Histone H1.0 OS=Homo sapiens GN=H1F0 PE=1 SV=3;>sp|P07305-2|H10_HUMAN Isoform 2 of Histone H1.0 OS=Homo sapiens GN=H1F0	6466800	1929600	793410	752960	958560	1480500	5827500	3467900	1930800	1432200	942620	1687100	1476800	1	793330	640140	2135300	978230	1	1	1776600	1147100	555200	1
P07339;H7C469;C9JH19;F8WD96;F8W787;H7C1V0	Cathepsin D;Cathepsin D light chain;Cathepsin D heavy chain	CTSD	>sp|P07339|CATD_HUMAN Cathepsin D OS=Homo sapiens GN=CTSD PE=1 SV=1;>tr|H7C469|H7C469_HUMAN Uncharacterized protein (Fragment) OS=Homo sapiens PE=3 SV=1;>tr|C9JH19|C9JH19_HUMAN Cathepsin D light chain (Fragment) OS=Homo sapiens GN=CTSD PE=2 SV=1;>tr|F8WD96	1	1	832650	1423300	647790	1	1	1	1	1	1	1	916010	1	1	1	1	1	1	1	885440	1	1	1
P07355-2;P07355;A6NMY6;H0YN42;H0YMU9;H0YMD0;H0YKS4;H0YM50;H0YMM1;H0YNP5;H0YMW4;H0YKX9;H0YMT9;H0YLV6;H0YKZ7;H0YL33;H0YN28;H0YKL9;H0YKV8;H0YMD9;H0YNA0;H0YKN4;H0YN52;H0YNB8;H0YLE2	Annexin A2;Putative annexin A2-like protein;Annexin	ANXA2;ANXA2P2	>sp|P07355-2|ANXA2_HUMAN Isoform 2 of Annexin A2 OS=Homo sapiens GN=ANXA2;>sp|P07355|ANXA2_HUMAN Annexin A2 OS=Homo sapiens GN=ANXA2 PE=1 SV=2;>sp|A6NMY6|AXA2L_HUMAN Putative annexin A2-like protein OS=Homo sapiens GN=ANXA2P2 PE=5 SV=2;>tr|H0YN42|H0YN42_HU	380870000	328360000	370830000	286800000	248920000	209790000	151730000	145370000	125610000	123930000	92897000	94888000	189710000	188550000	121880000	127650000	86040000	87045000	152570000	175810000	139140000	163570000	132650000	150700000
P07437;Q5JP53;Q5ST81;E9PBJ4;A6NNZ2;I3L2F9;A6NKZ8;CON__ENSEMBL:ENSBTAP00000025008;Q9H4B7	Tubulin beta chain	TUBB	>sp|P07437|TBB5_HUMAN Tubulin beta chain OS=Homo sapiens GN=TUBB PE=1 SV=2;>tr|Q5JP53|Q5JP53_HUMAN Tubulin beta chain OS=Homo sapiens GN=TUBB PE=2 SV=1;>tr|Q5ST81|Q5ST81_HUMAN Tubulin beta chain OS=Homo sapiens GN=TUBB PE=2 SV=1;>tr|E9PBJ4|E9PBJ4_HUMAN Tub	214270000	224250000	211410000	212590000	521080000	512600000	168160000	154260000	133790000	88437000	144950000	142080000	201060000	152350000	181330000	147880000	158180000	135720000	159130000	122970000	160800000	124130000	126130000	140210000
P07737;K7EJ44;I3L3D5;CON__P02584	Profilin-1	PFN1	>sp|P07737|PROF1_HUMAN Profilin-1 OS=Homo sapiens GN=PFN1 PE=1 SV=2;>tr|K7EJ44|K7EJ44_HUMAN Profilin 1, isoform CRA_b OS=Homo sapiens GN=PFN1 PE=2 SV=1;>tr|I3L3D5|I3L3D5_HUMAN Profilin-1 (Fragment) OS=Homo sapiens GN=PFN1 PE=2 SV=1	147170000	137420000	124600000	110870000	51563000	50672000	11630000	13290000	6385800	5340300	516140	1848100	62784000	59906000	6579900	5472500	2160100	3332900	7977500	7060900	10516000	16910000	9342600	10500000
P07814	Bifunctional glutamate/proline--tRNA ligase;Glutamate--tRNA ligase;Proline--tRNA ligase	EPRS	>sp|P07814|SYEP_HUMAN Bifunctional glutamate/proline--tRNA ligase OS=Homo sapiens GN=EPRS PE=1 SV=5	42406000	26537000	67775000	59852000	116440000	170360000	52091000	69909000	53050000	66270000	57672000	79076000	71155000	44940000	98854000	94660000	86207000	58490000	59198000	155960000	98457000	68538000	24825000	53651000
P07900-2;P07900;Q86U12;G3V2J8;Q14568;Q58FG0;Q58FF6;Q58FG1;Q92538;REV__H3BMH3	Heat shock protein HSP 90-alpha	HSP90AA1	>sp|P07900-2|HS90A_HUMAN Isoform 2 of Heat shock protein HSP 90-alpha OS=Homo sapiens GN=HSP90AA1;>sp|P07900|HS90A_HUMAN Heat shock protein HSP 90-alpha OS=Homo sapiens GN=HSP90AA1 PE=1 SV=5;>tr|Q86U12|Q86U12_HUMAN Full-length cDNA clone CS0CAP007YF18 of T	297580000	243560000	287520000	304970000	240100000	231740000	97650000	88631000	70785000	73744000	54392000	52295000	211350000	198620000	83145000	92740000	68315000	61453000	97159000	85737000	85667000	86808000	85784000	81202000
P07910;G3V2Q1;P07910-2;G3V4C1;B4DY08;G3V4W0;G3V576;P07910-4;O60812;G3V575;G3V555;B4DSU6;G3V251;G3V3K6;G3V5X6;P07910-3;G3V4M8;G3V2D6;G3V5V7;G3V2H6	Heterogeneous nuclear ribonucleoproteins C1/C2;Heterogeneous nuclear ribonucleoprotein C-like 1	HNRNPC;HNRNPCL1	>sp|P07910|HNRPC_HUMAN Heterogeneous nuclear ribonucleoproteins C1/C2 OS=Homo sapiens GN=HNRNPC PE=1 SV=4;>tr|G3V2Q1|G3V2Q1_HUMAN Heterogeneous nuclear ribonucleoproteins C1/C2 OS=Homo sapiens GN=HNRNPC PE=2 SV=1;>sp|P07910-2|HNRPC_HUMAN Isoform C1 of Hete	136540000	163120000	38392000	25948000	70229000	67177000	24511000	19014000	37854000	37349000	28235000	27065000	56834000	57920000	25588000	29766000	42346000	22034000	21883000	17037000	19248000	20108000	12239000	12738000
P08107;P08107-2;E7EP94	Heat shock 70 kDa protein 1A/1B	HSPA1A	>sp|P08107|HSP71_HUMAN Heat shock 70 kDa protein 1A/1B OS=Homo sapiens GN=HSPA1A PE=1 SV=5;>sp|P08107-2|HSP71_HUMAN Isoform 2 of Heat shock 70 kDa protein 1A/1B OS=Homo sapiens GN=HSPA1A;>tr|E7EP94|E7EP94_HUMAN Heat shock 70 kDa protein 1A/1B OS=Homo sapie	1152300000	1011000000	949540000	987050000	1072100000	1077000000	627100000	746790000	620110000	525590000	683220000	600610000	806390000	888930000	620720000	693130000	506020000	502910000	530970000	563210000	800170000	857800000	524960000	509250000
P08195-4;J3KPF3;P08195;F5GZS6;P08195-3;P08195-2;H0YFS2	4F2 cell-surface antigen heavy chain	SLC3A2	>sp|P08195-4|4F2_HUMAN Isoform 4 of 4F2 cell-surface antigen heavy chain OS=Homo sapiens GN=SLC3A2;>tr|J3KPF3|J3KPF3_HUMAN 4F2 cell-surface antigen heavy chain OS=Homo sapiens GN=SLC3A2 PE=2 SV=1;>sp|P08195|4F2_HUMAN 4F2 cell-surface antigen heavy chain OS	9016600	7253700	1	1	4698000	4306200	1	1	1	1	1	1	6154600	3685700	1	1	1	1	1	1	1	1	1	1
P08238;Q58FF7;Q5T9W8;F8W026	Heat shock protein HSP 90-beta;Putative heat shock protein HSP 90-beta-3	HSP90AB1;HSP90AB3P	>sp|P08238|HS90B_HUMAN Heat shock protein HSP 90-beta OS=Homo sapiens GN=HSP90AB1 PE=1 SV=4;>sp|Q58FF7|H90B3_HUMAN Putative heat shock protein HSP 90-beta-3 OS=Homo sapiens GN=HSP90AB3P PE=5 SV=1	982550000	1053300000	1169700000	1063400000	1077900000	1043500000	330450000	329970000	242250000	259140000	199340000	232290000	705360000	725070000	267800000	314350000	209230000	220140000	255470000	298520000	281840000	344430000	271900000	309440000
P08574	Cytochrome c1, heme protein, mitochondrial	CYC1	>sp|P08574|CY1_HUMAN Cytochrome c1, heme protein, mitochondrial OS=Homo sapiens GN=CYC1 PE=1 SV=3	7643000	9613000	9084300	7000300	6766200	7851600	3289500	1	4638000	1	1	1548200	4073800	3755500	1	5025900	6298100	3272800	1	3553600	1	3490300	4065500	4720500
P08579	U2 small nuclear ribonucleoprotein B	SNRPB2	>sp|P08579|RU2B_HUMAN U2 small nuclear ribonucleoprotein B OS=Homo sapiens GN=SNRPB2 PE=1 SV=1	5114500	14864000	14838000	19925000	9456300	7259000	19206000	13758000	22411000	21353000	16972000	16914000	12838000	11026000	11847000	9635600	11963000	7126800	11551000	11261000	9497800	9473900	17517000	7824200
P08590;P05976;P05976-2	Myosin light chain 3;Myosin light chain 1/3, skeletal muscle isoform	MYL3;MYL1	>sp|P08590|MYL3_HUMAN Myosin light chain 3 OS=Homo sapiens GN=MYL3 PE=1 SV=3;>sp|P05976|MYL1_HUMAN Myosin light chain 1/3, skeletal muscle isoform OS=Homo sapiens GN=MYL1 PE=1 SV=3;>sp|P05976-2|MYL1_HUMAN Isoform MLC3 of Myosin light chain 1/3, skeletal mu	20787000	5558100	1	14882000	23507000	23452000	1	1	1	1	1	1	1	3850900	2967100	1	1	1	1	1	3775700	1	1	1
P08621;P08621-2;P08621-3;M0QYR1;P08621-4	U1 small nuclear ribonucleoprotein 70 kDa	SNRNP70	>sp|P08621|RU17_HUMAN U1 small nuclear ribonucleoprotein 70 kDa OS=Homo sapiens GN=SNRNP70 PE=1 SV=2;>sp|P08621-2|RU17_HUMAN Isoform 2 of U1 small nuclear ribonucleoprotein 70 kDa OS=Homo sapiens GN=SNRNP70;>sp|P08621-3|RU17_HUMAN Isoform 3 of U1 small nuc	60008000	67724000	6201600	5354500	7280100	15544000	7109300	13992000	10140000	4653900	4484900	6013900	41156000	44202000	7083100	24394000	16295000	20546000	2814100	7198500	5777500	2894800	10851000	8501600
P08708;P0CW22;H0YK46;H0YN88;H0YN73;H3BNC9;REV__F8WFC6	40S ribosomal protein S17;40S ribosomal protein S17-like	RPS17;RPS17L	>sp|P08708|RS17_HUMAN 40S ribosomal protein S17 OS=Homo sapiens GN=RPS17 PE=1 SV=2;>sp|P0CW22|RS17L_HUMAN 40S ribosomal protein S17-like OS=Homo sapiens GN=RPS17L PE=1 SV=1;>tr|H0YK46|H0YK46_HUMAN 40S ribosomal protein S17 (Fragment) OS=Homo sapiens GN=RPS	269410000	236180000	66368000	83062000	104980000	97100000	65010000	74084000	57690000	67183000	79926000	99956000	291300000	312360000	126540000	118370000	156060000	180390000	70633000	68026000	89274000	87481000	52721000	57166000
P08727;C9JM50	Keratin, type I cytoskeletal 19	KRT19	>sp|P08727|K1C19_HUMAN Keratin, type I cytoskeletal 19 OS=Homo sapiens GN=KRT19 PE=1 SV=4	1	5563300	2275700	2890600	24006000	20936000	1	1	1	1	1	1	1	1203900	1	1	1	1	1	1	1	1	1	1
P08758;D6RBL5;E9PHT9;D6RBE9	Annexin A5;Annexin	ANXA5	>sp|P08758|ANXA5_HUMAN Annexin A5 OS=Homo sapiens GN=ANXA5 PE=1 SV=2;>tr|D6RBL5|D6RBL5_HUMAN Annexin OS=Homo sapiens GN=ANXA5 PE=2 SV=1;>tr|E9PHT9|E9PHT9_HUMAN Annexin OS=Homo sapiens GN=ANXA5 PE=2 SV=1	25912000	24035000	8233100	10820000	4046200	4457800	1	1	1	1	1	1	7344900	6981600	1	1	1	1	1	5232300	2326600	6633600	1	1
P08865;C9J9K3;A6NE09;C9JQR9	40S ribosomal protein SA	RPSA;RPSAP58	>sp|P08865|RSSA_HUMAN 40S ribosomal protein SA OS=Homo sapiens GN=RPSA PE=1 SV=4;>tr|C9J9K3|C9J9K3_HUMAN 40S ribosomal protein SA (Fragment) OS=Homo sapiens GN=RPSA PE=2 SV=1;>tr|A6NE09|A6NE09_HUMAN 40S ribosomal protein SA OS=Homo sapiens GN=RPSAP58 PE=2	3433400000	3246800000	184920000	211420000	175780000	131440000	165510000	148240000	108780000	100310000	237050000	285650000	1040900000	942340000	182820000	167680000	298800000	330510000	173580000	138340000	140930000	143030000	71152000	81574000
P09012;M0R268;M0R2B8;M0R221;M0QXK2;M0R0G9	U1 small nuclear ribonucleoprotein A	SNRPA	>sp|P09012|SNRPA_HUMAN U1 small nuclear ribonucleoprotein A OS=Homo sapiens GN=SNRPA PE=1 SV=3;>tr|M0R268|M0R268_HUMAN U1 small nuclear ribonucleoprotein A (Fragment) OS=Homo sapiens GN=SNRPA PE=2 SV=1;>tr|M0R2B8|M0R2B8_HUMAN U1 small nuclear ribonucleopro	2737800	4594100	4001400	2666300	4651200	3282800	3796200	3153600	1	1	1	2301700	2894800	3741000	3471900	2894500	1	1	1	2200700	3584100	2872600	1	1
P09211;A8MX94	Glutathione S-transferase P	GSTP1	>sp|P09211|GSTP1_HUMAN Glutathione S-transferase P OS=Homo sapiens GN=GSTP1 PE=1 SV=2;>tr|A8MX94|A8MX94_HUMAN Glutathione S-transferase P OS=Homo sapiens GN=GSTP1 PE=2 SV=1	87044000	62431000	37072000	48732000	13561000	20396000	4996200	5526400	3934600	4967900	1	1	25924000	17425000	2639600	3326300	1	1	1	1	6695700	5494400	6430200	4625500
P09382;F8WEI7	Galectin-1	LGALS1	>sp|P09382|LEG1_HUMAN Galectin-1 OS=Homo sapiens GN=LGALS1 PE=1 SV=2	80378000	76482000	78866000	76522000	74021000	60335000	44597000	47712000	39781000	47486000	40185000	38132000	38340000	26673000	46424000	37009000	45381000	39564000	46611000	56201000	33636000	28844000	38710000	38996000
P09429;Q5T7C6;Q5T7C4;B2RPK0;Q5T7C0;D6R9A6	High mobility group protein B1	HMGB1	>sp|P09429|HMGB1_HUMAN High mobility group protein B1 OS=Homo sapiens GN=HMGB1 PE=1 SV=3;>tr|Q5T7C6|Q5T7C6_HUMAN High mobility group protein B1 (Fragment) OS=Homo sapiens GN=HMGB1 PE=4 SV=1;>tr|Q5T7C4|Q5T7C4_HUMAN High mobility group protein B1 OS=Homo sap	61958000	52989000	28223000	27922000	20637000	28188000	4809100	1	1	5801200	1	4224800	32487000	21829000	5044700	5741800	4884700	58858000	10889000	1	13445000	6963100	5459400	6857600
P09651;P09651-2;F8W6I7;P09651-3;F8VZ49;F8VTQ5;Q32P51;F8W646;H0YH80;F8VYN5	Heterogeneous nuclear ribonucleoprotein A1;Heterogeneous nuclear ribonucleoprotein A1-like 2	HNRNPA1;HNRNPA1L2	>sp|P09651|ROA1_HUMAN Heterogeneous nuclear ribonucleoprotein A1 OS=Homo sapiens GN=HNRNPA1 PE=1 SV=5;>sp|P09651-2|ROA1_HUMAN Isoform A1-A of Heterogeneous nuclear ribonucleoprotein A1 OS=Homo sapiens GN=HNRNPA1;>tr|F8W6I7|F8W6I7_HUMAN Heterogeneous nuclea	74914000	81330000	131910000	119020000	127540000	106640000	87297000	102620000	104870000	108610000	85840000	99959000	79488000	100320000	100100000	78186000	90398000	108110000	62450000	59724000	58444000	65328000	42335000	49269000
P09661;H0YKK0;H0YMA0;H0YLR3	U2 small nuclear ribonucleoprotein A	SNRPA1	>sp|P09661|RU2A_HUMAN U2 small nuclear ribonucleoprotein A OS=Homo sapiens GN=SNRPA1 PE=1 SV=2;>tr|H0YKK0|H0YKK0_HUMAN Small nuclear ribonucleoprotein polypeptide A, isoform CRA_a OS=Homo sapiens GN=SNRPA1 PE=2 SV=1;>tr|H0YMA0|H0YMA0_HUMAN U2 small nucle	9928400	15157000	15171000	16582000	1	3735900	16270000	19819000	11915000	9739900	18828000	21212000	11320000	14959000	11235000	14706000	13772000	11538000	10580000	1	13755000	12581000	10723000	12574000
P09874;Q5VX85;Q5VX84	Poly [ADP-ribose] polymerase 1	PARP1	>sp|P09874|PARP1_HUMAN Poly [ADP-ribose] polymerase 1 OS=Homo sapiens GN=PARP1 PE=1 SV=4	1699000000	1231000000	12502000	6518700	10459000	7112300	1377700	1910700	966230	869840	2977800	6432000	303530000	362840000	521210	670390	9181500	9904400	4824100	4386000	1564300	824920	271080	2723500
P0C0S8;P20671;Q6FI13;Q16777;Q9BTM1;Q96KK5;Q99878;Q9BTM1-2;H0YFX9;P0C0S5;Q71UI9;C9J0D1;Q71UI9-2;Q71UI9-4;Q71UI9-3;C9J386;Q71UI9-5	Histone H2A type 1;Histone H2A type 1-D;Histone H2A type 2-A;Histone H2A type 2-C;Histone H2A.J;Histone H2A type 1-H;Histone H2A type 1-J;Histone H2A	HIST1H2AG;HIST1H2AD;HIST2H2AA3;HIST2H2AC;H2AFJ;HIST1H2AH;HIST1H2AJ	>sp|P0C0S8|H2A1_HUMAN Histone H2A type 1 OS=Homo sapiens GN=HIST1H2AG PE=1 SV=2;>sp|P20671|H2A1D_HUMAN Histone H2A type 1-D OS=Homo sapiens GN=HIST1H2AD PE=1 SV=2;>sp|Q6FI13|H2A2A_HUMAN Histone H2A type 2-A OS=Homo sapiens GN=HIST2H2AA3 PE=1 SV=3;>sp|Q1677	284510000	253910000	117830000	118850000	291050000	295840000	85054000	85164000	368960000	370220000	176250000	166030000	143480000	114750000	63854000	68085000	116710000	122450000	64308000	82461000	318260000	348210000	75619000	90497000
P10412;P16402;Q02539;P22492;P16401	Histone H1.4;Histone H1.3	HIST1H1E;HIST1H1D	>sp|P10412|H14_HUMAN Histone H1.4 OS=Homo sapiens GN=HIST1H1E PE=1 SV=2;>sp|P16402|H13_HUMAN Histone H1.3 OS=Homo sapiens GN=HIST1H1D PE=1 SV=2	110240000	171120000	29955000	20560000	53143000	44597000	13776000	8877500	43961000	48160000	31634000	22640000	65863000	74938000	30298000	28777000	37078000	32550000	9077900	10344000	58882000	49709000	11078000	14424000
P10599;P10599-2	Thioredoxin	TXN	>sp|P10599|THIO_HUMAN Thioredoxin OS=Homo sapiens GN=TXN PE=1 SV=3;>sp|P10599-2|THIO_HUMAN Isoform 2 of Thioredoxin OS=Homo sapiens GN=TXN	77768000	37126000	30887000	37274000	47601000	44500000	69797000	68490000	44819000	29764000	45381000	47562000	52721000	45136000	51180000	46832000	46163000	35526000	54803000	72835000	34108000	36148000	25206000	32943000
P10644;K7ER48;K7EPB2;K7EM13;K7EK41;K7EJ40;K7ENR3;K7EID3;K7EIE5;K7EMZ6;K7EMU2;K7EQK3;K7EPR5;P31321;C9JSK5;H7BYW5;K7EKR1	cAMP-dependent protein kinase type I-alpha regulatory subunit	PRKAR1A	>sp|P10644|KAP0_HUMAN cAMP-dependent protein kinase type I-alpha regulatory subunit OS=Homo sapiens GN=PRKAR1A PE=1 SV=1;>tr|K7ER48|K7ER48_HUMAN cAMP-dependent protein kinase type I-alpha regulatory subunit OS=Homo sapiens GN=PRKAR1A PE=4 SV=2;>tr|K7EPB2|K	72283000	63387000	90494000	97457000	108560000	98415000	92479000	92285000	99297000	87775000	79941000	73311000	81887000	75125000	87138000	91245000	78765000	80424000	70980000	80037000	80637000	82579000	80135000	77293000
P10809;E7ESH4;E7EXB4;C9JL25;B7Z712;C9JCQ4;C9JL19;C9J0S9	60 kDa heat shock protein, mitochondrial	HSPD1	>sp|P10809|CH60_HUMAN 60 kDa heat shock protein, mitochondrial OS=Homo sapiens GN=HSPD1 PE=1 SV=2	278350000	235010000	236240000	198600000	294560000	279570000	51360000	34837000	30782000	31246000	19977000	18944000	152790000	128900000	39637000	50608000	28147000	13415000	27280000	50966000	57181000	40355000	43775000	40802000
P11021;REV__Q9NXD2;REV__Q9NXD2-2;REV__H3BUZ0;REV__B4DLB6	78 kDa glucose-regulated protein	HSPA5	>sp|P11021|GRP78_HUMAN 78 kDa glucose-regulated protein OS=Homo sapiens GN=HSPA5 PE=1 SV=2	425620000	492210000	462460000	463250000	496240000	481930000	391680000	398090000	354810000	372040000	398370000	368660000	517390000	508410000	506310000	514340000	454460000	412700000	288870000	300820000	452580000	438020000	311310000	324450000
P11142;E9PKE3;P11142-2;E9PNE6;E9PN89;A8K7Q2;E9PLF4;E9PK54;E9PQK7;E9PQQ4;P54652;E9PPY6;E9PN25;E9PS65;E9PI65;E9PM13	Heat shock cognate 71 kDa protein	HSPA8	>sp|P11142|HSP7C_HUMAN Heat shock cognate 71 kDa protein OS=Homo sapiens GN=HSPA8 PE=1 SV=1;>tr|E9PKE3|E9PKE3_HUMAN Heat shock cognate 71 kDa protein OS=Homo sapiens GN=HSPA8 PE=2 SV=1;>sp|P11142-2|HSP7C_HUMAN Isoform 2 of Heat shock cognate 71 kDa protein	1296000000	1212700000	1211500000	1181400000	1519600000	1312400000	949690000	945430000	926580000	844610000	922420000	863340000	1051000000	1067200000	1035000000	1051200000	878440000	835340000	851500000	852940000	1065800000	1144700000	813100000	855580000
P11182;Q5VVL7	Lipoamide acyltransferase component of branched-chain alpha-keto acid dehydrogenase complex, mitochondrial	DBT	>sp|P11182|ODB2_HUMAN Lipoamide acyltransferase component of branched-chain alpha-keto acid dehydrogenase complex, mitochondrial OS=Homo sapiens GN=DBT PE=1 SV=3;>tr|Q5VVL7|Q5VVL7_HUMAN Lipoamide acyltransferase component of branched-chain alpha-keto acid	13641000	6970700	6927000	10293000	3739700	4553500	12215000	14140000	12307000	7502600	14588000	10834000	5676400	5959500	4487200	6152800	6542300	6552200	9338400	9211700	9807700	21508000	7650300	7367400
P11387;Q969P6;Q969P6-2;E5RIC7;E5RFS0;E5RJ95	DNA topoisomerase 1	TOP1	>sp|P11387|TOP1_HUMAN DNA topoisomerase 1 OS=Homo sapiens GN=TOP1 PE=1 SV=2	45973000	63945000	923190	1574500	6308400	3039700	1	1	1	912080	1498700	1043200	8267100	9505100	1243300	5259300	1380900	2030400	912100	1	1479300	734510	1	1
P11413-2;P11413-3;P11413;E7EUI8;E7EM57;E9PD92	Glucose-6-phosphate 1-dehydrogenase	G6PD	>sp|P11413-2|G6PD_HUMAN Isoform Long of Glucose-6-phosphate 1-dehydrogenase OS=Homo sapiens GN=G6PD;>sp|P11413-3|G6PD_HUMAN Isoform 3 of Glucose-6-phosphate 1-dehydrogenase OS=Homo sapiens GN=G6PD;>sp|P11413|G6PD_HUMAN Glucose-6-phosphate 1-dehydrogenase O	7537300	7201200	6841200	8979600	5457200	5498200	2702600	1	1	6309000	1	1	3341800	4319900	1	1	1	1	1	1	1	1	1	1
P11908-2;P11908;H7C540;D3YTJ7;A6NMS2	Ribose-phosphate pyrophosphokinase 2	PRPS2	>sp|P11908-2|PRPS2_HUMAN Isoform 2 of Ribose-phosphate pyrophosphokinase 2 OS=Homo sapiens GN=PRPS2;>sp|P11908|PRPS2_HUMAN Ribose-phosphate pyrophosphokinase 2 OS=Homo sapiens GN=PRPS2 PE=1 SV=2;>tr|H7C540|H7C540_HUMAN Ribose-phosphate pyrophosphokinase 2	1	1	1	5841600	1	1	1	1	1	1	1	1	1	1	1	1	1	1	1	1	1	1	1	1
P11940;P11940-2;E7EQV3;E7ERJ7;H0YAR2;Q9H361;H0YBN4;H0YAP2;E5RJB9;E5RGH3;Q4VXU2;H0YB86;E5RH24;H0YB75;H0YAS6;Q4VY17;H0YAS7;B1ANR1;E5RHG7;H0YC10;Q96DU9;Q96DU9-2;H0YEQ8;Q5JQF8;E5RFD8;E5RGC4	Polyadenylate-binding protein 1;Polyadenylate-binding protein 3	PABPC1;PABPC3	>sp|P11940|PABP1_HUMAN Polyadenylate-binding protein 1 OS=Homo sapiens GN=PABPC1 PE=1 SV=2;>sp|P11940-2|PABP1_HUMAN Isoform 2 of Polyadenylate-binding protein 1 OS=Homo sapiens GN=PABPC1;>tr|E7EQV3|E7EQV3_HUMAN Polyadenylate-binding protein 1 OS=Homo sapie	321090000	274270000	267070000	322290000	361720000	385280000	294920000	295300000	330840000	291700000	293270000	318330000	327970000	305520000	326350000	342390000	340720000	313430000	304180000	275870000	226790000	214220000	249070000	251530000
P12004	Proliferating cell nuclear antigen	PCNA	>sp|P12004|PCNA_HUMAN Proliferating cell nuclear antigen OS=Homo sapiens GN=PCNA PE=1 SV=1	26767000	24923000	28120000	25070000	37714000	37373000	10983000	10988000	1	7356700	5799000	8176300	20292000	10439000	11521000	10355000	11314000	17727000	1	8541900	20481000	15976000	8754700	10794000
P12236;I7HJJ0;P12235;Q9H0C2	ADP/ATP translocase 3;ADP/ATP translocase 1	SLC25A6;SLC25A4	>sp|P12236|ADT3_HUMAN ADP/ATP translocase 3 OS=Homo sapiens GN=SLC25A6 PE=1 SV=4;>tr|I7HJJ0|I7HJJ0_HUMAN ADP/ATP translocase 3 (Fragment) OS=Homo sapiens GN=SLC25A6 PE=2 SV=1;>sp|P12235|ADT1_HUMAN ADP/ATP translocase 1 OS=Homo sapiens GN=SLC25A4 PE=1 SV=4	52202000	40219000	23586000	35026000	42383000	61207000	12213000	13167000	12052000	12006000	14281000	14876000	13379000	15710000	17732000	21728000	16208000	15273000	11055000	21506000	12903000	11921000	18539000	13785000
P12268;H0Y4R1;E7ETK5;P20839-6;P20839-5;P20839-7;P20839-3;E7EQS0;P20839;C9J381;P20839-4;P20839-2;C9K0R9	Inosine-5-monophosphate dehydrogenase 2	IMPDH2	>sp|P12268|IMDH2_HUMAN Inosine-5-monophosphate dehydrogenase 2 OS=Homo sapiens GN=IMPDH2 PE=1 SV=2;>tr|H0Y4R1|H0Y4R1_HUMAN Inosine-5-monophosphate dehydrogenase 2 (Fragment) OS=Homo sapiens GN=IMPDH2 PE=3 SV=1	38466000	37143000	65595000	61519000	83428000	88239000	74493000	75356000	64670000	70827000	59421000	58392000	68925000	76247000	52942000	49427000	44276000	49396000	45900000	50934000	69346000	72584000	62419000	51895000
P12270	Nucleoprotein TPR	TPR	>sp|P12270|TPR_HUMAN Nucleoprotein TPR OS=Homo sapiens GN=TPR PE=1 SV=3	107470000	97876000	54393000	78359000	102420000	102280000	142400000	116910000	142580000	114780000	131690000	140860000	104220000	59714000	108280000	94520000	118570000	87771000	155600000	179630000	135270000	142700000	92699000	107770000
P12277;G3V4N7;H0YJG0;G3V461	Creatine kinase B-type	CKB	>sp|P12277|KCRB_HUMAN Creatine kinase B-type OS=Homo sapiens GN=CKB PE=1 SV=1;>tr|G3V4N7|G3V4N7_HUMAN Creatine kinase B-type (Fragment) OS=Homo sapiens GN=CKB PE=2 SV=1	8424600	9036700	8490200	6718200	3385400	3298900	4106800	1	1	1	1	1	2383000	3600500	909600	1	1	1	1	1	4353700	1	1	1
P12429;D6RA82;D6RFG5	Annexin A3;Annexin	ANXA3	>sp|P12429|ANXA3_HUMAN Annexin A3 OS=Homo sapiens GN=ANXA3 PE=1 SV=3;>tr|D6RA82|D6RA82_HUMAN Annexin OS=Homo sapiens GN=ANXA3 PE=2 SV=1	4007000	1	1	6772600	1	2694800	1	1	1	1	1	1	2643900	1	1	1	1	1	1	1	1	1	1	1
P12956;B1AHC9;B1AHC8;F5H1I8	X-ray repair cross-complementing protein 6	XRCC6	>sp|P12956|XRCC6_HUMAN X-ray repair cross-complementing protein 6 OS=Homo sapiens GN=XRCC6 PE=1 SV=2;>tr|B1AHC9|B1AHC9_HUMAN X-ray repair cross-complementing protein 6 OS=Homo sapiens GN=XRCC6 PE=2 SV=1;>tr|B1AHC8|B1AHC8_HUMAN X-ray repair complementing de	122310000	124720000	88538000	70541000	94867000	72942000	15482000	13307000	21815000	15799000	11978000	34177000	29329000	16119000	14785000	12607000	16958000	18007000	10773000	15539000	12229000	16987000	18045000	19883000
P13010;C9JZ81	X-ray repair cross-complementing protein 5	XRCC5	>sp|P13010|XRCC5_HUMAN X-ray repair cross-complementing protein 5 OS=Homo sapiens GN=XRCC5 PE=1 SV=3	100450000	76921000	40181000	28768000	62719000	47578000	5448500	5300900	6787400	4136400	1428000	2789200	18454000	18326000	5532400	6113100	3928500	2521500	15548000	4076200	5764000	1688900	1	6552600
P13639;K7EP67;K7EJ74	Elongation factor 2	EEF2	>sp|P13639|EF2_HUMAN Elongation factor 2 OS=Homo sapiens GN=EEF2 PE=1 SV=4	1491900000	1288700000	331350000	303120000	227350000	231860000	103540000	83727000	81600000	94737000	94233000	101200000	682820000	682420000	83226000	81447000	197970000	190430000	132230000	109470000	92430000	81485000	100280000	114390000
P13646;P13646-3;K7ERE3;CON__ENSEMBL:ENSP00000377550;P13646-2;K7EMD9;K7EQH6;CON__Q6IFU5;Q6A162;G3V1C2	Keratin, type I cytoskeletal 13	KRT13	>sp|P13646|K1C13_HUMAN Keratin, type I cytoskeletal 13 OS=Homo sapiens GN=KRT13 PE=1 SV=4;>sp|P13646-3|K1C13_HUMAN Isoform 3 of Keratin, type I cytoskeletal 13 OS=Homo sapiens GN=KRT13;>tr|K7ERE3|K7ERE3_HUMAN Keratin, type I cytoskeletal 13 OS=Homo sapiens	1	1	1	1	1	6317800	7160100	7860200	8926800	9256700	1	1	2284100	1	8209900	7307700	1652100	1	8915300	1	8800700	8628600	6849800	1
P13984	General transcription factor IIF subunit 2	GTF2F2	>sp|P13984|T2FB_HUMAN General transcription factor IIF subunit 2 OS=Homo sapiens GN=GTF2F2 PE=1 SV=2	19687000	14578000	15353000	18280000	22825000	17303000	29584000	28644000	21917000	23196000	28898000	29987000	25827000	22405000	33915000	31334000	23852000	29116000	21851000	16697000	43276000	35809000	20444000	22288000
P14174	Macrophage migration inhibitory factor	MIF	>sp|P14174|MIF_HUMAN Macrophage migration inhibitory factor OS=Homo sapiens GN=MIF PE=1 SV=4	1	1	1	9869000	1	1507800	1	3728900	1	1	1	1	1	1	1	3717900	1	1	1	1	1	1	1	1
P14618;P14618-2;P14618-3;H3BTN5;H3BQ34;Q504U3;H3BTJ2;H3BUW1;H3BT25;H3BU13;P30613;P30613-2;H3BQZ3;H3BN34	Pyruvate kinase isozymes M1/M2;Pyruvate kinase	PKM2	>sp|P14618|KPYM_HUMAN Pyruvate kinase PKM OS=Homo sapiens GN=PKM PE=1 SV=4;>sp|P14618-2|KPYM_HUMAN Isoform M1 of Pyruvate kinase PKM OS=Homo sapiens GN=PKM;>sp|P14618-3|KPYM_HUMAN Isoform 3 of Pyruvate kinase PKM OS=Homo sapiens GN=PKM;>tr|H3BTN5|H3BTN5_HU	493340000	465460000	286970000	316160000	232020000	150370000	42741000	55865000	14598000	14005000	15078000	10622000	156860000	121010000	37011000	39750000	19192000	21590000	14475000	30209000	40466000	39852000	49553000	48567000
P14625;H0YIV0	Endoplasmin	HSP90B1	>sp|P14625|ENPL_HUMAN Endoplasmin OS=Homo sapiens GN=HSP90B1 PE=1 SV=1	49152000	29873000	54864000	30030000	14281000	16069000	5245900	7933300	6633600	16215000	6840400	1	28093000	22394000	9730600	11958000	7268200	10105000	15961000	9331500	13149000	8357100	7618800	6641100
P14678-3;P14678;P14678-2;B3KVR1;P63162;J3QLE5;S4R3P3;J3KRY3;A8MT02	Small nuclear ribonucleoprotein-associated proteins B and B;Small nuclear ribonucleoprotein-associated protein;Small nuclear ribonucleoprotein-associated protein N	SNRPB;SNRPN	>sp|P14678-3|RSMB_HUMAN Isoform SM-B1 of Small nuclear ribonucleoprotein-associated proteins B and B OS=Homo sapiens GN=SNRPB;>sp|P14678|RSMB_HUMAN Small nuclear ribonucleoprotein-associated proteins B and B OS=Homo sapiens GN=SNRPB PE=1 SV=2;>sp|P14678-	469020000	418310000	446410000	488850000	171120000	154720000	590200000	590010000	581710000	477910000	531610000	521050000	415010000	410560000	520020000	459920000	452790000	382200000	518560000	509800000	591290000	540230000	536060000	555110000
P14866;M0QXS5;P14866-2;M0QYT0;M0R1W6;B4DVF8;M0R076;D6W592;Q8WVV9;Q8WVV9-4;B7WPG3;Q5JB52;M0QYL7;H7C464	Heterogeneous nuclear ribonucleoprotein L	HNRNPL	>sp|P14866|HNRPL_HUMAN Heterogeneous nuclear ribonucleoprotein L OS=Homo sapiens GN=HNRNPL PE=1 SV=2;>tr|M0QXS5|M0QXS5_HUMAN Heterogeneous nuclear ribonucleoprotein L (Fragment) OS=Homo sapiens GN=HNRNPL PE=4 SV=1;>sp|P14866-2|HNRPL_HUMAN Isoform 2 of Hete	133660000	159100000	239450000	211990000	84685000	59892000	200210000	207070000	190870000	170800000	175970000	187710000	132190000	122600000	158090000	159530000	197170000	190930000	157920000	144020000	38169000	39861000	100180000	104090000
P14868;Q68CR9;H7BZ35;C9JLC1;H7C278;C9J7S3;C9JQM9	Aspartate--tRNA ligase, cytoplasmic	DARS;DKFZp781B11202	>sp|P14868|SYDC_HUMAN Aspartate--tRNA ligase, cytoplasmic OS=Homo sapiens GN=DARS PE=1 SV=2;>tr|Q68CR9|Q68CR9_HUMAN Aspartate--tRNA ligase, cytoplasmic OS=Homo sapiens GN=DKFZp781B11202 PE=2 SV=1;>tr|H7BZ35|H7BZ35_HUMAN Aspartate--tRNA ligase, cytoplasmic	61168000	52140000	23523000	80046000	118250000	141040000	178060000	10521000	12771000	7995500	23851000	65675000	79230000	77443000	22812000	13598000	37337000	32337000	574940000	73863000	7459200	84910000	57197000	119690000
P14923	Junction plakoglobin	JUP	>sp|P14923|PLAK_HUMAN Junction plakoglobin OS=Homo sapiens GN=JUP PE=1 SV=3	419180000	403680000	497020000	485460000	626900000	482060000	332060000	355910000	235970000	434370000	574960000	520280000	338990000	292540000	160980000	316080000	496270000	427520000	280400000	324200000	225560000	217000000	884220000	1092200000
P15056;H7C5K3	Serine/threonine-protein kinase B-raf	BRAF	>sp|P15056|BRAF_HUMAN Serine/threonine-protein kinase B-raf OS=Homo sapiens GN=BRAF PE=1 SV=4	1	20009000	14625000	13262000	7128200	1	13856000	1	1	1	1	1	18041000	18151000	33154000	30682000	35251000	32616000	1	1	1	1	1	14382000
P15311;E7EQR4;P35241-5;P35241;P26038;P35241-4;P35241-3;E9PNV3;E9PQ82	Ezrin	EZR	>sp|P15311|EZRI_HUMAN Ezrin OS=Homo sapiens GN=EZR PE=1 SV=4;>tr|E7EQR4|E7EQR4_HUMAN Ezrin OS=Homo sapiens GN=EZR PE=2 SV=2	248270000	173270000	243440000	243100000	189850000	201030000	71421000	73385000	44075000	80091000	37573000	47796000	144270000	154370000	77947000	75999000	61143000	49955000	61760000	64097000	98115000	97199000	87133000	63661000
P15559;H3BRK3;P15559-2;P15559-3;B4DLR8;H3BNV2	NAD(P)H dehydrogenase [quinone] 1	NQO1	>sp|P15559|NQO1_HUMAN NAD(P)H dehydrogenase [quinone] 1 OS=Homo sapiens GN=NQO1 PE=1 SV=1;>tr|H3BRK3|H3BRK3_HUMAN NAD(P)H dehydrogenase [quinone] 1 OS=Homo sapiens GN=NQO1 PE=2 SV=1;>sp|P15559-2|NQO1_HUMAN Isoform 2 of NAD(P)H dehydrogenase [quinone] 1 OS=	25024000	24736000	14062000	5587000	37632000	33205000	1	12390000	1	1	1985400	85346000	14915000	8350400	13926000	1	1	1	1	1	1	1	1	1
P15880;H0YEN5;E9PQD7;E9PMM9;E9PM36;E9PPT0;I3L404;H0YE27;H3BNG3	40S ribosomal protein S2	RPS2	>sp|P15880|RS2_HUMAN 40S ribosomal protein S2 OS=Homo sapiens GN=RPS2 PE=1 SV=2;>tr|H0YEN5|H0YEN5_HUMAN 40S ribosomal protein S2 (Fragment) OS=Homo sapiens GN=RPS2 PE=2 SV=1;>tr|E9PQD7|E9PQD7_HUMAN 40S ribosomal protein S2 OS=Homo sapiens GN=RPS2 PE=2 SV=1	1230600000	1191700000	151320000	147760000	217200000	232130000	110900000	107500000	137510000	129190000	151010000	168980000	473200000	378280000	148340000	146370000	244000000	250480000	122800000	146680000	133320000	135600000	107170000	99082000
P15924;P15924-2	Desmoplakin	DSP	>sp|P15924|DESP_HUMAN Desmoplakin OS=Homo sapiens GN=DSP PE=1 SV=3;>sp|P15924-2|DESP_HUMAN Isoform DPII of Desmoplakin OS=Homo sapiens GN=DSP	224180000	212140000	259440000	253730000	263210000	279930000	229990000	218850000	249860000	270670000	283030000	284260000	172990000	172120000	257100000	258320000	241790000	246220000	354450000	355980000	215510000	209850000	610560000	610140000
P16104;Q96QV6;Q8IUE6	Histone H2A.x;Histone H2A type 1-A;Histone H2A type 2-B	H2AFX;HIST1H2AA;HIST2H2AB	>sp|P16104|H2AX_HUMAN Histone H2AX OS=Homo sapiens GN=H2AFX PE=1 SV=2;>sp|Q96QV6|H2A1A_HUMAN Histone H2A type 1-A OS=Homo sapiens GN=HIST1H2AA PE=1 SV=3;>sp|Q8IUE6|H2A2B_HUMAN Histone H2A type 2-B OS=Homo sapiens GN=HIST2H2AB PE=1 SV=3	1571700	1711800	1	1221200	5179800	2745200	1	1	2282400	2406100	1	1	1	838480	447460	1	1	1	1	1	1366100	2038600	1	1
P16671;E7EU05;D9IX69;D9IX66;E9PLT1;D9IX68	Platelet glycoprotein 4	CD36	>sp|P16671|CD36_HUMAN Platelet glycoprotein 4 OS=Homo sapiens GN=CD36 PE=1 SV=2;>tr|E7EU05|E7EU05_HUMAN Platelet glycoprotein 4 (Fragment) OS=Homo sapiens GN=CD36 PE=2 SV=2;>tr|D9IX69|D9IX69_HUMAN Platelet glycoprotein 4 OS=Homo sapiens GN=CD36 PE=2 SV=1;>	6056200	5669300	9172400	15223000	11275000	17112000	18411000	19229000	20702000	20195000	18421000	19523000	9074500	9709200	14959000	12708000	15049000	14767000	25396000	25417000	21196000	11625000	16174000	15400000
P17066;P48741	Heat shock 70 kDa protein 6	HSPA6	>sp|P17066|HSP76_HUMAN Heat shock 70 kDa protein 6 OS=Homo sapiens GN=HSPA6 PE=1 SV=2	31462000	24394000	69466000	63107000	71668000	69568000	48670000	55758000	51794000	59235000	46570000	51662000	62891000	53083000	63468000	58999000	39554000	38925000	61345000	51695000	67533000	67408000	40549000	44519000
P17612-2;P17612;K7ERP6;Q15136;REV__Q06190;P22694-2;P22694-9;P22694-6;P22694-7;P22694-5;P22694;P22694-3;P22694-4;P22694-10	cAMP-dependent protein kinase catalytic subunit alpha	PRKACA;KIN27	>sp|P17612-2|KAPCA_HUMAN Isoform 2 of cAMP-dependent protein kinase catalytic subunit alpha OS=Homo sapiens GN=PRKACA;>sp|P17612|KAPCA_HUMAN cAMP-dependent protein kinase catalytic subunit alpha OS=Homo sapiens GN=PRKACA PE=1 SV=2;>tr|K7ERP6|K7ERP6_HUMAN c	13822000	8753300	9016100	6740300	6694300	7215000	9969500	3079200	3481800	3515900	1790300	1	10836000	5540500	6882000	4493000	1	1	4155600	11886000	7959900	4768600	1	1
P17931;G3V3R6	Galectin-3	LGALS3	>sp|P17931|LEG3_HUMAN Galectin-3 OS=Homo sapiens GN=LGALS3 PE=1 SV=5;>tr|G3V3R6|G3V3R6_HUMAN Galectin OS=Homo sapiens GN=LGALS3 PE=2 SV=1	152660000	149030000	181940000	161520000	183270000	185260000	128110000	141950000	120250000	114450000	115430000	115470000	150530000	133830000	139040000	146870000	118430000	114960000	128730000	126700000	135660000	143670000	99678000	103800000
P17980;R4GNH3;E9PM69;E9PKD5;E9PMD8;E9PN50;E9PLG2	26S protease regulatory subunit 6A	PSMC3	>sp|P17980|PRS6A_HUMAN 26S protease regulatory subunit 6A OS=Homo sapiens GN=PSMC3 PE=1 SV=3;>tr|R4GNH3|R4GNH3_HUMAN 26S protease regulatory subunit 6A OS=Homo sapiens GN=PSMC3 PE=4 SV=1;>tr|E9PM69|E9PM69_HUMAN 26S protease regulatory subunit 6A OS=Homo sa	10632000	14627000	16343000	15871000	24074000	19901000	15241000	14110000	20019000	17204000	15322000	14432000	18095000	19432000	19294000	18598000	12584000	16958000	7590600	1	16135000	17778000	13045000	11172000
P17987;E7ERF2;E7EQR6;F5H282;F5GZ03;F5H136;F5H676;F5GZI8;F5H726;F5GYL4;F5H7Y1	T-complex protein 1 subunit alpha	TCP1	>sp|P17987|TCPA_HUMAN T-complex protein 1 subunit alpha OS=Homo sapiens GN=TCP1 PE=1 SV=1;>tr|E7ERF2|E7ERF2_HUMAN T-complex protein 1 subunit alpha OS=Homo sapiens GN=TCP1 PE=2 SV=1;>tr|E7EQR6|E7EQR6_HUMAN T-complex protein 1 subunit alpha OS=Homo sapiens	150040000	163490000	189110000	213530000	304650000	327220000	127850000	111660000	141100000	133870000	108300000	104680000	143040000	143420000	129080000	122410000	115180000	112200000	108000000	98210000	126200000	128920000	125190000	115340000
P18077;C9K025;F8WB72;F8WBS5	60S ribosomal protein L35a	RPL35A	>sp|P18077|RL35A_HUMAN 60S ribosomal protein L35a OS=Homo sapiens GN=RPL35A PE=1 SV=2;>tr|C9K025|C9K025_HUMAN 60S ribosomal protein L35a (Fragment) OS=Homo sapiens GN=RPL35A PE=2 SV=1;>tr|F8WB72|F8WB72_HUMAN 60S ribosomal protein L35a OS=Homo sapiens GN=RP	444300000	345300000	53713000	54425000	87376000	84157000	70912000	64595000	74153000	103710000	75678000	76337000	368230000	383600000	95328000	92713000	131930000	142950000	76243000	83898000	80344000	81319000	62505000	68176000
P18085;C9JAK5;C9JPM4;F5H0C7;U3KQF2;F8WDB3;F5H6T5;F5H1V1	ADP-ribosylation factor 4	ARF4	>sp|P18085|ARF4_HUMAN ADP-ribosylation factor 4 OS=Homo sapiens GN=ARF4 PE=1 SV=3;>tr|C9JAK5|C9JAK5_HUMAN ADP-ribosylation factor 4 OS=Homo sapiens GN=ARF4 PE=2 SV=1;>tr|C9JPM4|C9JPM4_HUMAN ADP-ribosylation factor 4 (Fragment) OS=Homo sapiens GN=ARF4 PE=2	3277500	3869900	3485000	2689300	3624400	3990100	1	1	1	1	1	1	1	2722700	1	1	1	1	1	1	1	1	1	1
P18124;A8MUD9;C9JIJ5;C9JZ88	60S ribosomal protein L7	RPL7	>sp|P18124|RL7_HUMAN 60S ribosomal protein L7 OS=Homo sapiens GN=RPL7 PE=1 SV=1;>tr|A8MUD9|A8MUD9_HUMAN 60S ribosomal protein L7 OS=Homo sapiens GN=RPL7 PE=2 SV=1	2228300000	2343100000	260580000	263130000	433570000	457390000	281220000	274290000	266760000	275060000	376250000	370630000	1200500000	1096700000	350550000	360570000	485800000	484650000	330900000	309420000	359340000	354040000	234220000	206460000
P18621-3;P18621;J3KRX5;J3QQT2;J3QLC8;P18621-2;J3QS96;J3KRB3;J3KSJ0;O60437;K7EKI8;K7EQ71	60S ribosomal protein L17	RPL17	>sp|P18621-3|RL17_HUMAN Isoform 3 of 60S ribosomal protein L17 OS=Homo sapiens GN=RPL17;>sp|P18621|RL17_HUMAN 60S ribosomal protein L17 OS=Homo sapiens GN=RPL17 PE=1 SV=3;>tr|J3KRX5|J3KRX5_HUMAN 60S ribosomal protein L17 (Fragment) OS=Homo sapiens GN=RPL17	569010000	553860000	103980000	119440000	177620000	195950000	93050000	114970000	90282000	80737000	144840000	145860000	367860000	410260000	120340000	126750000	189820000	193140000	139230000	124370000	117800000	130640000	79439000	89046000
P18669;P15259;Q8N0Y7	Phosphoglycerate mutase 1;Phosphoglycerate mutase 2;Probable phosphoglycerate mutase 4	PGAM1;PGAM2;PGAM4	>sp|P18669|PGAM1_HUMAN Phosphoglycerate mutase 1 OS=Homo sapiens GN=PGAM1 PE=1 SV=2;>sp|P15259|PGAM2_HUMAN Phosphoglycerate mutase 2 OS=Homo sapiens GN=PGAM2 PE=1 SV=3;>sp|Q8N0Y7|PGAM4_HUMAN Probable phosphoglycerate mutase 4 OS=Homo sapiens GN=PGAM4 PE=2	10103000	10569000	15054000	15207000	4701800	10976000	1846900	4681000	1	1370500	7084100	1114000	5917400	9396300	1516200	1947600	1	1	1945200	1	2086600	2166000	1806500	1758000
P19338;H7BY16;C9JWL1;C9J1H7;C9JLB1;C9JYW2	Nucleolin	NCL	>sp|P19338|NUCL_HUMAN Nucleolin OS=Homo sapiens GN=NCL PE=1 SV=3;>tr|H7BY16|H7BY16_HUMAN Nucleolin (Fragment) OS=Homo sapiens GN=NCL PE=2 SV=1	964350000	1046900000	414980000	429500000	657400000	656660000	379070000	410390000	334510000	348930000	427050000	415550000	622780000	679260000	509070000	520760000	487620000	514770000	297220000	320160000	370150000	371440000	217740000	223930000
P20042	Eukaryotic translation initiation factor 2 subunit 2	EIF2S2	>sp|P20042|IF2B_HUMAN Eukaryotic translation initiation factor 2 subunit 2 OS=Homo sapiens GN=EIF2S2 PE=1 SV=2	1376200000	863930000	481930000	669630000	1	483430000	188670000	1699200000	1157400000	1283000000	1553400000	1413000000	3471400	536700000	252530000	391590000	1332100000	1472300000	593460000	649140000	540680000	457190000	862670000	968940000
P21333;P21333-2;Q5HY54;E9PHF0;F8WE98;H0Y5C6;H0Y5F3;H7C2E7;H7C5L4	Filamin-A	FLNA	>sp|P21333|FLNA_HUMAN Filamin-A OS=Homo sapiens GN=FLNA PE=1 SV=4;>sp|P21333-2|FLNA_HUMAN Isoform 2 of Filamin-A OS=Homo sapiens GN=FLNA;>tr|Q5HY54|Q5HY54_HUMAN Filamin-A OS=Homo sapiens GN=FLNA PE=2 SV=1	2243600000	2481500000	4129600000	4128900000	6358000000	6031800000	4937200000	5036700000	4802800000	4812200000	4813100000	4847500000	3259100000	3250900000	4515600000	4287200000	3773900000	3727600000	4585400000	4667300000	5022300000	5085700000	4224900000	4358300000
P21796	Voltage-dependent anion-selective channel protein 1	VDAC1	>sp|P21796|VDAC1_HUMAN Voltage-dependent anion-selective channel protein 1 OS=Homo sapiens GN=VDAC1 PE=1 SV=2	18448000	10145000	6439500	6439100	6286700	4591200	1	1	1	1	1	1	5523000	6185000	2227100	2308300	1	1	1	1	1	1	1	1
P22079;F5H386;P22079-2	Lactoperoxidase	LPO	>sp|P22079|PERL_HUMAN Lactoperoxidase OS=Homo sapiens GN=LPO PE=1 SV=2;>tr|F5H386|F5H386_HUMAN Lactoperoxidase OS=Homo sapiens GN=LPO PE=2 SV=1;>sp|P22079-2|PERL_HUMAN Isoform 2 of Lactoperoxidase OS=Homo sapiens GN=LPO	4931700	33517000	17091000	18736000	17688000	16110000	21371000	25563000	20970000	31266000	28334000	31449000	25834000	26643000	14337000	17636000	25842000	29046000	23417000	22725000	19796000	21772000	19701000	20253000
P22087;M0R2Q4;M0QXL5;M0R299;M0R0P1;M0R2B0;M0R1H0;M0R2U2;R4GMW7;A6NHQ2	rRNA 2-O-methyltransferase fibrillarin	FBL	>sp|P22087|FBRL_HUMAN rRNA 2-O-methyltransferase fibrillarin OS=Homo sapiens GN=FBL PE=1 SV=2;>tr|M0R2Q4|M0R2Q4_HUMAN rRNA 2-O-methyltransferase fibrillarin (Fragment) OS=Homo sapiens GN=FBL PE=2 SV=1;>tr|M0QXL5|M0QXL5_HUMAN rRNA 2-O-methyltransferase f	50545000	44797000	21290000	22672000	31322000	29046000	12725000	10434000	16476000	22595000	14073000	11240000	16147000	19839000	13299000	12817000	10881000	9271800	9021300	13613000	28462000	30848000	14987000	14624000
P22234;P22234-2;E9PBS1;D6RF62	Multifunctional protein ADE2;Phosphoribosylaminoimidazole-succinocarboxamide synthase;Phosphoribosylaminoimidazole carboxylase	PAICS	>sp|P22234|PUR6_HUMAN Multifunctional protein ADE2 OS=Homo sapiens GN=PAICS PE=1 SV=3;>sp|P22234-2|PUR6_HUMAN Isoform 2 of Multifunctional protein ADE2 OS=Homo sapiens GN=PAICS;>tr|E9PBS1|E9PBS1_HUMAN Phosphoribosylaminoimidazole carboxylase (Fragment) OS=	18742000	9626300	8138200	4658300	5922900	7406900	4915600	1	1	1	1	1	4118300	3415300	3848100	3745000	1	1	1	1	4628500	1	1	1
P22626;P22626-2	Heterogeneous nuclear ribonucleoproteins A2/B1	HNRNPA2B1	>sp|P22626|ROA2_HUMAN Heterogeneous nuclear ribonucleoproteins A2/B1 OS=Homo sapiens GN=HNRNPA2B1 PE=1 SV=2;>sp|P22626-2|ROA2_HUMAN Isoform A2 of Heterogeneous nuclear ribonucleoproteins A2/B1 OS=Homo sapiens GN=HNRNPA2B1	44558000	48223000	64842000	62855000	45833000	43926000	34779000	41701000	58783000	51879000	46002000	46539000	49498000	53511000	42991000	50869000	33142000	35979000	16401000	32195000	39323000	42184000	10721000	23553000
P22695;H3BRG4;H3BSJ9;H3BP04;H3BUI9;H3BUE4	Cytochrome b-c1 complex subunit 2, mitochondrial	UQCRC2	>sp|P22695|QCR2_HUMAN Cytochrome b-c1 complex subunit 2, mitochondrial OS=Homo sapiens GN=UQCRC2 PE=1 SV=3;>tr|H3BRG4|H3BRG4_HUMAN Cytochrome b-c1 complex subunit 2, mitochondrial OS=Homo sapiens GN=UQCRC2 PE=2 SV=1;>tr|H3BSJ9|H3BSJ9_HUMAN Cytochrome b-c1	2416100	7390400	2198800	2379700	28377000	20897000	2522300	1252500	9465400	40258000	3144500	2589200	32481000	22498000	2603500	2282300	7185800	20791000	11464000	40358000	12455000	3950700	5919900	23887000
P23246;P23246-2;H0Y9K7	Splicing factor, proline- and glutamine-rich	SFPQ	>sp|P23246|SFPQ_HUMAN Splicing factor, proline- and glutamine-rich OS=Homo sapiens GN=SFPQ PE=1 SV=2;>sp|P23246-2|SFPQ_HUMAN Isoform Short of Splicing factor, proline- and glutamine-rich OS=Homo sapiens GN=SFPQ	84388000	114340000	113500000	109880000	95724000	87732000	101270000	113770000	107760000	115850000	87617000	96494000	168680000	198260000	74983000	91923000	86409000	89289000	80427000	79699000	112100000	110730000	81960000	100380000
P23284	Peptidyl-prolyl cis-trans isomerase B	PPIB	>sp|P23284|PPIB_HUMAN Peptidyl-prolyl cis-trans isomerase B OS=Homo sapiens GN=PPIB PE=1 SV=2	28439000	41300000	18695000	19570000	11270000	13186000	1	9059200	3716000	1	1	1	11541000	9662800	6334200	7385600	7118500	6198700	1	6406600	8660400	12118000	11538000	8821800
P23381;P23381-2;G3V3Y5;G3V3H8;G3V277;H0YJP3;G3V456;G3V5U1;G3V423	Tryptophan--tRNA ligase, cytoplasmic;T1-TrpRS;T2-TrpRS	WARS	>sp|P23381|SYWC_HUMAN Tryptophan--tRNA ligase, cytoplasmic OS=Homo sapiens GN=WARS PE=1 SV=2;>sp|P23381-2|SYWC_HUMAN Isoform 2 of Tryptophan--tRNA ligase, cytoplasmic OS=Homo sapiens GN=WARS	31492000	34930000	32419000	44301000	29525000	27564000	22696000	17018000	27412000	22630000	23402000	24116000	28871000	22906000	21253000	21946000	20085000	10390000	19325000	18716000	18813000	30793000	24654000	23904000
P23396;P23396-2;E9PL09;E9PPU1;H0YEU2;F2Z2S8;H0YCJ7;E9PK82;E9PJH4;E9PQ96;H0YF32;E9PSF4;E9PQX2;H0YES8	40S ribosomal protein S3	RPS3	>sp|P23396|RS3_HUMAN 40S ribosomal protein S3 OS=Homo sapiens GN=RPS3 PE=1 SV=2;>sp|P23396-2|RS3_HUMAN Isoform 2 of 40S ribosomal protein S3 OS=Homo sapiens GN=RPS3;>tr|E9PL09|E9PL09_HUMAN 40S ribosomal protein S3 OS=Homo sapiens GN=RPS3 PE=2 SV=1;>tr|E9PP	2285600000	2446300000	280600000	293780000	425040000	413540000	233860000	220370000	261840000	240840000	345510000	350940000	1042900000	978260000	322340000	328160000	448330000	447040000	250070000	299960000	282110000	279260000	181300000	184060000
P23458;O60674;F5H5U8	Tyrosine-protein kinase JAK1	JAK1	>sp|P23458|JAK1_HUMAN Tyrosine-protein kinase JAK1 OS=Homo sapiens GN=JAK1 PE=1 SV=2	64683000	59540000	90117000	101890000	53875000	66034000	119100000	125050000	117310000	113120000	104460000	101060000	71707000	73888000	111380000	111840000	106000000	117950000	96787000	116510000	118060000	130550000	99869000	100600000
P23526	Adenosylhomocysteinase	AHCY	>sp|P23526|SAHH_HUMAN Adenosylhomocysteinase OS=Homo sapiens GN=AHCY PE=1 SV=4	20011000	6840000	14169000	16057000	6052100	11639000	4966600	7368800	1	1	1	1	9618200	9974000	4431300	1	1	1	5157300	1	7306600	1	3317100	1
P24534;C9JZW3;F2Z2G2;F8WF65	Elongation factor 1-beta	EEF1B2	>sp|P24534|EF1B_HUMAN Elongation factor 1-beta OS=Homo sapiens GN=EEF1B2 PE=1 SV=3	87106000	157110000	106490000	153780000	185260000	213480000	111060000	108300000	148820000	169830000	112410000	90094000	119680000	107180000	119670000	90957000	105220000	72592000	113120000	119950000	146600000	123720000	140780000	124390000
P25398	40S ribosomal protein S12	RPS12	>sp|P25398|RS12_HUMAN 40S ribosomal protein S12 OS=Homo sapiens GN=RPS12 PE=1 SV=3	1408700000	1361900000	156980000	101040000	157060000	120200000	90149000	105950000	106500000	116670000	161570000	171940000	377730000	405890000	102620000	100560000	165610000	172730000	102630000	112650000	119460000	101760000	82512000	83486000
P25705;P25705-2;K7ENP3;K7ERX7;K7EK77;K7EJP1;K7EQH4;K7ENJ4;K7ESA0	ATP synthase subunit alpha, mitochondrial	ATP5A1	>sp|P25705|ATPA_HUMAN ATP synthase subunit alpha, mitochondrial OS=Homo sapiens GN=ATP5A1 PE=1 SV=1;>sp|P25705-2|ATPA_HUMAN Isoform 2 of ATP synthase subunit alpha, mitochondrial OS=Homo sapiens GN=ATP5A1;>tr|K7ENP3|K7ENP3_HUMAN ATP synthase subunit alpha	68772000	85519000	53833000	39250000	113700000	98627000	8426200	3631700	1	1	1	1	23799000	33099000	12226000	15341000	8689100	7353600	8437500	9875800	11232000	10996000	1	1
P25789;H0YL69;H0YN18;H0YMZ1;H0YMA1;P25789-2;H0YMI6;H0YKT8;H0YLC2;H0YLS6;H0YKS0;H0YMV3	Proteasome subunit alpha type-4;Proteasome subunit alpha type;Proteasome subunit beta type	PSMA4	>sp|P25789|PSA4_HUMAN Proteasome subunit alpha type-4 OS=Homo sapiens GN=PSMA4 PE=1 SV=1;>tr|H0YL69|H0YL69_HUMAN Proteasome subunit alpha type (Fragment) OS=Homo sapiens GN=PSMA4 PE=2 SV=1;>tr|H0YN18|H0YN18_HUMAN Proteasome subunit alpha type-4 OS=Homo sap	22257000	31649000	25358000	21671000	17758000	20463000	25187000	26671000	20204000	22793000	27084000	23627000	23114000	23616000	22591000	17901000	21522000	15914000	18836000	15624000	24791000	28231000	20724000	24835000
P26368;P26368-2;K7ENG2	Splicing factor U2AF 65 kDa subunit	U2AF2	>sp|P26368|U2AF2_HUMAN Splicing factor U2AF 65 kDa subunit OS=Homo sapiens GN=U2AF2 PE=1 SV=4;>sp|P26368-2|U2AF2_HUMAN Isoform 2 of Splicing factor U2AF 65 kDa subunit OS=Homo sapiens GN=U2AF2;>tr|K7ENG2|K7ENG2_HUMAN Splicing factor U2AF 65 kDa subunit OS=	6672100	5146900	4280700	3752100	4367500	3617600	3750200	9841200	1	1	3868500	4674800	6678000	4908200	6349500	3879300	1	1	1	1	5398300	4546000	1	1
P26373;P26373-2;J3QSB4;J3KS98;H3BTH3;H3BUK8	60S ribosomal protein L13	RPL13	>sp|P26373|RL13_HUMAN 60S ribosomal protein L13 OS=Homo sapiens GN=RPL13 PE=1 SV=4;>sp|P26373-2|RL13_HUMAN Isoform 2 of 60S ribosomal protein L13 OS=Homo sapiens GN=RPL13	1439800000	1153000000	234360000	234430000	437620000	444460000	326260000	301050000	269490000	267440000	376540000	409450000	1663200000	1427500000	416310000	379910000	578710000	587890000	283350000	259530000	400120000	402940000	235560000	229050000
P26599-3;P26599-2;P26599;A6NLN1;K7EKJ7;K7ELW5;K7ES59;O95758-4;O95758-5;O95758;O95758-2;O95758-6;O95758-1;K7EK45;O95758-7	Polypyrimidine tract-binding protein 1	PTBP1	>sp|P26599-3|PTBP1_HUMAN Isoform 3 of Polypyrimidine tract-binding protein 1 OS=Homo sapiens GN=PTBP1;>sp|P26599-2|PTBP1_HUMAN Isoform 2 of Polypyrimidine tract-binding protein 1 OS=Homo sapiens GN=PTBP1;>sp|P26599|PTBP1_HUMAN Polypyrimidine tract-binding	147130000	177840000	188730000	167850000	93352000	99904000	86156000	95164000	78322000	78440000	67129000	62563000	90593000	93798000	71715000	77539000	75309000	72264000	71412000	72484000	35723000	35743000	49445000	46799000
P26640;B4DZ61;A2ABF4	Valine--tRNA ligase	VARS	>sp|P26640|SYVC_HUMAN Valine--tRNA ligase OS=Homo sapiens GN=VARS PE=1 SV=4	2611000	3016200	2669600	5053000	3671800	5162100	2987900	3759200	4197500	5535100	3186500	4782400	4715400	6806600	7175600	4759500	3429800	4795400	3124200	3151600	4245700	5760200	4431600	3038000
P26641;B4DTG2	Elongation factor 1-gamma	EEF1G	>sp|P26641|EF1G_HUMAN Elongation factor 1-gamma OS=Homo sapiens GN=EEF1G PE=1 SV=3;>tr|B4DTG2|B4DTG2_HUMAN Elongation factor 1-gamma OS=Homo sapiens GN=EEF1G PE=2 SV=1	293150000	293020000	354390000	344310000	512150000	546430000	398330000	462290000	395740000	482150000	392750000	365200000	411570000	393760000	417650000	432350000	327060000	306100000	336560000	282890000	434470000	415940000	361830000	359650000
P27105;B4E2V5;P27105-2	Erythrocyte band 7 integral membrane protein	STOM	>sp|P27105|STOM_HUMAN Erythrocyte band 7 integral membrane protein OS=Homo sapiens GN=STOM PE=1 SV=3;>tr|B4E2V5|B4E2V5_HUMAN Erythrocyte band 7 integral membrane protein OS=Homo sapiens GN=STOM PE=2 SV=1;>sp|P27105-2|STOM_HUMAN Isoform 2 of Erythrocyte ban	1	1	1	1	1	1	1252000	1518000	1	1	853800	967710	2393500	2232300	7280300	6119100	5777800	5217900	1	1	1	1	1	1
P27348;E9PG15	14-3-3 protein theta	YWHAQ	>sp|P27348|1433T_HUMAN 14-3-3 protein theta OS=Homo sapiens GN=YWHAQ PE=1 SV=1;>tr|E9PG15|E9PG15_HUMAN 14-3-3 protein theta (Fragment) OS=Homo sapiens GN=YWHAQ PE=2 SV=1	2021200	5484800	6614700	7490500	5281900	8436200	2373400	2141400	1727200	1	1	1	4852000	5844200	3917800	2763700	2748800	2546600	2014300	1	2800400	2582500	1	1
P27361;P27361-3;E9PQW4;P27361-2;E9PBK7;B3KR49;E9PJF0;E9PRH7;H0YEX6;H0YDH9	Mitogen-activated protein kinase 3	MAPK3	>sp|P27361|MK03_HUMAN Mitogen-activated protein kinase 3 OS=Homo sapiens GN=MAPK3 PE=1 SV=4;>sp|P27361-3|MK03_HUMAN Isoform 3 of Mitogen-activated protein kinase 3 OS=Homo sapiens GN=MAPK3;>tr|E9PQW4|E9PQW4_HUMAN Mitogen-activated protein kinase 3 OS=Homo	1	15883000	1	1	1	16160000	21738000	21185000	14858000	15245000	28279000	24688000	17498000	17551000	18996000	18102000	24832000	24755000	18046000	15879000	21925000	22116000	20591000	18377000
P27635;F8W7C6;Q96L21;A6QRI9;H7C2C5;B8A6G2;H7C123;H7C2U2	60S ribosomal protein L10;60S ribosomal protein L10-like	RPL10;RPL10L	>sp|P27635|RL10_HUMAN 60S ribosomal protein L10 OS=Homo sapiens GN=RPL10 PE=1 SV=4;>tr|F8W7C6|F8W7C6_HUMAN 60S ribosomal protein L10 OS=Homo sapiens GN=RPL10 PE=2 SV=1;>sp|Q96L21|RL10L_HUMAN 60S ribosomal protein L10-like OS=Homo sapiens GN=RPL10L PE=1 SV=	1280300000	1094200000	104490000	93801000	219010000	207910000	138060000	148020000	142140000	135660000	169200000	202460000	495010000	518190000	167950000	164250000	217510000	220700000	89887000	129740000	182460000	164140000	116200000	119130000
P27708;F8VPD4	CAD protein;Glutamine-dependent carbamoyl-phosphate synthase;Aspartate carbamoyltransferase;Dihydroorotase	CAD	>sp|P27708|PYR1_HUMAN CAD protein OS=Homo sapiens GN=CAD PE=1 SV=3;>tr|F8VPD4|F8VPD4_HUMAN CAD protein OS=Homo sapiens GN=CAD PE=2 SV=1	48395000	20455000	6182400	6830900	19545000	10209000	7877300	1	1	1	1	5321600	35224000	36758000	1	1	1	1	1	1	1	1	1	1
P27797;K7EJB9;K7EL50	Calreticulin	CALR	>sp|P27797|CALR_HUMAN Calreticulin OS=Homo sapiens GN=CALR PE=1 SV=1;>tr|K7EJB9|K7EJB9_HUMAN Calreticulin (Fragment) OS=Homo sapiens GN=CALR PE=2 SV=1;>tr|K7EL50|K7EL50_HUMAN Calreticulin (Fragment) OS=Homo sapiens GN=CALR PE=3 SV=1	14518000	9981300	11176000	5175500	2099500	3682200	1	1	1	1	1	1	3213300	5367400	1	1416400	2028300	1	1	1	1	1	1	1
P29373	Cellular retinoic acid-binding protein 2	CRABP2	>sp|P29373|RABP2_HUMAN Cellular retinoic acid-binding protein 2 OS=Homo sapiens GN=CRABP2 PE=1 SV=2	1	3725800	3386200	3614200	1	1	1	1	1	1	1	1	1	1	1	1	1	1	1	1	1	1	1	1
P29400-2;P29400;P02462;P02462-2	Collagen alpha-5(IV) chain;Collagen alpha-1(IV) chain;Arresten	COL4A5;COL4A1	>sp|P29400-2|CO4A5_HUMAN Isoform 2 of Collagen alpha-5(IV) chain OS=Homo sapiens GN=COL4A5;>sp|P29400|CO4A5_HUMAN Collagen alpha-5(IV) chain OS=Homo sapiens GN=COL4A5 PE=1 SV=2;>sp|P02462|CO4A1_HUMAN Collagen alpha-1(IV) chain OS=Homo sapiens GN=COL4A1 PE=	1	1	1	1	1	1	1	1	8345600	10943000	1228700	1734300	1	1	1	1	4170800	2633000	9724600	10925000	1604100	1811800	7001700	7642000
P29401-2;P29401;B4E022;E9PFF2;F8W888;F8WAX4	Transketolase	TKT	>sp|P29401-2|TKT_HUMAN Isoform 2 of Transketolase OS=Homo sapiens GN=TKT;>sp|P29401|TKT_HUMAN Transketolase OS=Homo sapiens GN=TKT PE=1 SV=3;>tr|B4E022|B4E022_HUMAN Transketolase OS=Homo sapiens GN=TKT PE=2 SV=1;>tr|E9PFF2|E9PFF2_HUMAN Transketolase OS=Hom	33993000	34682000	14791000	20370000	4257400	6170700	1	3494900	1	6355300	1	1	5059400	4933600	2031000	3310000	4327800	5167700	1	1	2483100	7443500	6889700	2455200
P30040;F8VY02	Endoplasmic reticulum resident protein 29	ERP29	>sp|P30040|ERP29_HUMAN Endoplasmic reticulum resident protein 29 OS=Homo sapiens GN=ERP29 PE=1 SV=4;>tr|F8VY02|F8VY02_HUMAN Endoplasmic reticulum resident protein 29 OS=Homo sapiens GN=ERP29 PE=2 SV=1	1	1	1	1	1	1	1	1	1	1	1	1	1	1	1	1	1	1	1	1	1	1	1	1
P30041	Peroxiredoxin-6	PRDX6	>sp|P30041|PRDX6_HUMAN Peroxiredoxin-6 OS=Homo sapiens GN=PRDX6 PE=1 SV=3	168560000	196140000	192970000	168850000	217380000	187930000	57240000	54452000	63313000	51028000	37314000	35426000	104170000	96441000	57067000	45191000	28903000	19528000	38725000	47408000	65880000	62183000	62887000	62954000
P30048;E9PH29	Thioredoxin-dependent peroxide reductase, mitochondrial	PRDX3	>sp|P30048|PRDX3_HUMAN Thioredoxin-dependent peroxide reductase, mitochondrial OS=Homo sapiens GN=PRDX3 PE=1 SV=3;>tr|E9PH29|E9PH29_HUMAN Thioredoxin-dependent peroxide reductase, mitochondrial OS=Homo sapiens GN=PRDX3 PE=2 SV=1	7304800	10922000	6823300	9123300	6289600	7575300	3056700	3513600	3346100	1	1	1	5362500	5690700	1	1	1	1	4695000	4783200	1	1	4493500	1
P30050;P30050-2	60S ribosomal protein L12	RPL12	>sp|P30050|RL12_HUMAN 60S ribosomal protein L12 OS=Homo sapiens GN=RPL12 PE=1 SV=1;>sp|P30050-2|RL12_HUMAN Isoform 2 of 60S ribosomal protein L12 OS=Homo sapiens GN=RPL12	868110000	874710000	170760000	161350000	253380000	226260000	172540000	170850000	155870000	160460000	197000000	209770000	583540000	648420000	211790000	210480000	333390000	343730000	168030000	172880000	191560000	209850000	164580000	144480000
P30086	Phosphatidylethanolamine-binding protein 1;Hippocampal cholinergic neurostimulating peptide	PEBP1	>sp|P30086|PEBP1_HUMAN Phosphatidylethanolamine-binding protein 1 OS=Homo sapiens GN=PEBP1 PE=1 SV=3	182140000	31993000	58836000	30797000	41080000	20389000	1	1	1	1	1	1	8930600	1	1	1	1	1	1	1	1	1	1	1
P30101;G5EA52	Protein disulfide-isomerase A3	PDIA3	>sp|P30101|PDIA3_HUMAN Protein disulfide-isomerase A3 OS=Homo sapiens GN=PDIA3 PE=1 SV=4;>tr|G5EA52|G5EA52_HUMAN Protein disulfide isomerase family A, member 3, isoform CRA_b OS=Homo sapiens GN=PDIA3 PE=2 SV=1	13063000	13163000	14393000	12991000	1	8497100	4135700	5302000	1	12678000	1	1	6114600	7167000	5633500	1	1918500	1	1	1	1	1	1	1
P30153;F5H3X9;B3KQV6;E9PH38;C9J9C1	Serine/threonine-protein phosphatase 2A 65 kDa regulatory subunit A alpha isoform	PPP2R1A	>sp|P30153|2AAA_HUMAN Serine/threonine-protein phosphatase 2A 65 kDa regulatory subunit A alpha isoform OS=Homo sapiens GN=PPP2R1A PE=1 SV=4;>tr|F5H3X9|F5H3X9_HUMAN Serine/threonine-protein phosphatase 2A 65 kDa regulatory subunit A alpha isoform OS=Homo s	9950600	15742000	9348400	9881500	9292000	9047800	8060900	8452700	1	1	1	1	4798400	9214400	9554500	9808800	1	5691800	1	6019800	7207500	8165600	1	1
P31153;B4DN45;Q00266	S-adenosylmethionine synthase isoform type-2;S-adenosylmethionine synthase	MAT2A	>sp|P31153|METK2_HUMAN S-adenosylmethionine synthase isoform type-2 OS=Homo sapiens GN=MAT2A PE=1 SV=1;>tr|B4DN45|B4DN45_HUMAN S-adenosylmethionine synthase OS=Homo sapiens GN=MAT2A PE=2 SV=1	321170000	263260000	400430000	361350000	374990000	370910000	302420000	307730000	354430000	308270000	265250000	251500000	300480000	296640000	323100000	340920000	238040000	257210000	290630000	259660000	392750000	386190000	326020000	356290000
P31689;P31689-2;B7Z5C0	DnaJ homolog subfamily A member 1	DNAJA1	>sp|P31689|DNJA1_HUMAN DnaJ homolog subfamily A member 1 OS=Homo sapiens GN=DNAJA1 PE=1 SV=2;>sp|P31689-2|DNJA1_HUMAN Isoform 2 of DnaJ homolog subfamily A member 1 OS=Homo sapiens GN=DNAJA1	45291000	15594000	34232000	28843000	60615000	64741000	23592000	29678000	20379000	24195000	25172000	31703000	30721000	37025000	28767000	31069000	30270000	18548000	14772000	16883000	25732000	26527000	22717000	23000000
P31942;P31942-2;P31942-3;B4DHY1;P31942-4;P31942-5;P31942-6	Heterogeneous nuclear ribonucleoprotein H3	HNRNPH3	>sp|P31942|HNRH3_HUMAN Heterogeneous nuclear ribonucleoprotein H3 OS=Homo sapiens GN=HNRNPH3 PE=1 SV=2;>sp|P31942-2|HNRH3_HUMAN Isoform 2 of Heterogeneous nuclear ribonucleoprotein H3 OS=Homo sapiens GN=HNRNPH3;>sp|P31942-3|HNRH3_HUMAN Isoform 3 of Heterog	8967500	29989000	1	1	1	1	1	1	1	1	1	1104000	2834700	3419800	1	1	1	624520	891520	860850	1	1	1	1079700
P31944	Caspase-14;Caspase-14 subunit p19;Caspase-14 subunit p10	CASP14	>sp|P31944|CASPE_HUMAN Caspase-14 OS=Homo sapiens GN=CASP14 PE=1 SV=2	11658000	6189500	6738900	6456400	5759500	12500000	8167400	8872300	6683200	7536600	1	5417800	5424200	9398200	9272900	9061100	6205000	5601500	5172300	7237500	5303100	6747900	11055000	9820800
P31946;P31946-2;Q4VY19;Q4VY20	14-3-3 protein beta/alpha;14-3-3 protein beta/alpha, N-terminally processed	YWHAB	>sp|P31946|1433B_HUMAN 14-3-3 protein beta/alpha OS=Homo sapiens GN=YWHAB PE=1 SV=3;>sp|P31946-2|1433B_HUMAN Isoform Short of 14-3-3 protein beta/alpha OS=Homo sapiens GN=YWHAB;>tr|Q4VY19|Q4VY19_HUMAN 14-3-3 protein beta/alpha (Fragment) OS=Homo sapiens GN	3145400	2851800	11383000	10353000	7055800	6470800	3108400	2148900	1614000	3099700	1	1	14695000	14390000	12540000	12863000	14210000	13463000	2964800	3672800	3485100	4905400	2270300	2417700
P31947;P31947-2;Q04917;A2IDB2;A2IDB1;F8WEB6	14-3-3 protein sigma;14-3-3 protein eta	SFN;YWHAH	>sp|P31947|1433S_HUMAN 14-3-3 protein sigma OS=Homo sapiens GN=SFN PE=1 SV=1;>sp|P31947-2|1433S_HUMAN Isoform 2 of 14-3-3 protein sigma OS=Homo sapiens GN=SFN;>sp|Q04917|1433F_HUMAN 14-3-3 protein eta OS=Homo sapiens GN=YWHAH PE=1 SV=4	10984000	7632300	20483000	19037000	16354000	14017000	10671000	6515900	5002200	6691100	5115000	8822800	20194000	19689000	27784000	23733000	18117000	21197000	10747000	9711500	16549000	10863000	10272000	10278000
P32119;A6NIW5;P32119-2	Peroxiredoxin-2	PRDX2	>sp|P32119|PRDX2_HUMAN Peroxiredoxin-2 OS=Homo sapiens GN=PRDX2 PE=1 SV=5	33463000	40594000	35379000	36477000	29164000	34759000	21085000	20624000	20352000	23695000	15583000	14975000	25383000	19841000	18736000	19707000	16474000	15976000	26888000	24523000	26321000	20225000	31389000	34018000
P32969;H0Y9V9;D6RAN4;E7ESE0;H0Y9R4;REV__O75648;REV__O75648-2;REV__O75648-5;REV__B4DZN5	60S ribosomal protein L9	RPL9	>sp|P32969|RL9_HUMAN 60S ribosomal protein L9 OS=Homo sapiens GN=RPL9 PE=1 SV=1;>tr|H0Y9V9|H0Y9V9_HUMAN 60S ribosomal protein L9 (Fragment) OS=Homo sapiens GN=RPL9 PE=4 SV=1;>tr|D6RAN4|D6RAN4_HUMAN 60S ribosomal protein L9 (Fragment) OS=Homo sapiens GN=RPL	1905900000	2104500000	208690000	229000000	142180000	124110000	77439000	101540000	92917000	77312000	279210000	311640000	576660000	697040000	108690000	145040000	333470000	297600000	219170000	235290000	113190000	116000000	64452000	79126000
P33176;Q12840;O60282;J3KNA1;E9PET8;O60282-2	Kinesin-1 heavy chain;Kinesin heavy chain isoform 5A;Kinesin heavy chain isoform 5C	KIF5B;KIF5A;KIF5C	>sp|P33176|KINH_HUMAN Kinesin-1 heavy chain OS=Homo sapiens GN=KIF5B PE=1 SV=1;>sp|Q12840|KIF5A_HUMAN Kinesin heavy chain isoform 5A OS=Homo sapiens GN=KIF5A PE=1 SV=2;>sp|O60282|KIF5C_HUMAN Kinesin heavy chain isoform 5C OS=Homo sapiens GN=KIF5C PE=1 SV=1	1	2303600	3041000	2996300	6172400	6592200	3428100	2637300	1	2839700	4002700	1	1	2453200	1	2867900	1	1	1	1	1	2559500	1	1
P34096	Ribonuclease 4	RNASE4	>sp|P34096|RNAS4_HUMAN Ribonuclease 4 OS=Homo sapiens GN=RNASE4 PE=1 SV=3	7345000	9694300	1	12009000	1	10840000	1	1	16887000	20830000	1	11375000	8531900	5570700	1	1	15661000	1	1	16583000	28000000	30434000	14182000	14740000
P35222;B4DGU4	Catenin beta-1	CTNNB1	>sp|P35222|CTNB1_HUMAN Catenin beta-1 OS=Homo sapiens GN=CTNNB1 PE=1 SV=1;>tr|B4DGU4|B4DGU4_HUMAN Catenin beta-1 OS=Homo sapiens GN=CTNNB1 PE=2 SV=1	2250000	2141900	2159600	3362700	6056300	4889200	2772300	2541900	1	1	1407600	1	1	2015000	1578600	2066200	1	1	1	1	1	2298300	1	1
P35232;C9JW96;E9PCW0;E7ESE2;C9JZ20;B4DY47;D6RBK0	Prohibitin	PHB	>sp|P35232|PHB_HUMAN Prohibitin OS=Homo sapiens GN=PHB PE=1 SV=1;>tr|C9JW96|C9JW96_HUMAN Prohibitin (Fragment) OS=Homo sapiens GN=PHB PE=2 SV=2;>tr|E9PCW0|E9PCW0_HUMAN Prohibitin OS=Homo sapiens GN=PHB PE=2 SV=1;>tr|E7ESE2|E7ESE2_HUMAN Prohibitin (Fragment	18790000	25111000	17374000	16185000	11634000	12744000	4654000	5808100	4031500	3859700	3514100	1	15883000	11346000	5401800	5123000	1	9112700	3379200	5324000	7961400	5277000	3617400	4372600
P35268;K7ERI7;K7EMH1;K7ELC4;K7EKS7;K7EP65;K7EJT5	60S ribosomal protein L22	RPL22	>sp|P35268|RL22_HUMAN 60S ribosomal protein L22 OS=Homo sapiens GN=RPL22 PE=1 SV=2;>tr|K7ERI7|K7ERI7_HUMAN 60S ribosomal protein L22 OS=Homo sapiens GN=RPL22 PE=2 SV=1;>tr|K7EMH1|K7EMH1_HUMAN 60S ribosomal protein L22 (Fragment) OS=Homo sapiens GN=RPL22 PE	329690000	414260000	12513000	7525900	33879000	43934000	1	1	22029000	14035000	3640600	14739000	117110000	197400000	23701000	36177000	29433000	56243000	1	1	1	16557000	1	1
P35269;M0QXD6;E7EUG6;M0R0R9;M0R0Z3	General transcription factor IIF subunit 1	GTF2F1	>sp|P35269|T2FA_HUMAN General transcription factor IIF subunit 1 OS=Homo sapiens GN=GTF2F1 PE=1 SV=2;>tr|M0QXD6|M0QXD6_HUMAN General transcription factor IIF subunit 1 (Fragment) OS=Homo sapiens GN=GTF2F1 PE=2 SV=1;>tr|E7EUG6|E7EUG6_HUMAN General transcrip	16362000	17522000	19153000	14008000	17690000	17881000	22967000	19175000	21947000	16346000	13708000	15433000	12951000	17748000	29914000	26960000	19301000	17080000	18849000	17918000	15354000	29977000	16677000	23585000
P35527;CON__P35527;K7EQQ3	Keratin, type I cytoskeletal 9	KRT9	>sp|P35527|K1C9_HUMAN Keratin, type I cytoskeletal 9 OS=Homo sapiens GN=KRT9 PE=1 SV=3;>P35527 SWISS-PROT:P35527 Tax_Id=9606 Gene_Symbol=KRT9 Keratin, type I cytoskeletal 9;>tr|K7EQQ3|K7EQQ3_HUMAN Keratin, type I cytoskeletal 9 OS=Homo sapiens GN=KRT9 PE=2	9571700000	10410000000	17816000000	18840000000	15133000000	14805000000	13468000000	14239000000	14068000000	14646000000	15256000000	15521000000	9504600000	10777000000	14776000000	15195000000	14203000000	13923000000	23145000000	24782000000	15215000000	15928000000	35925000000	36185000000
P35579;P35579-2;P35580-4;P35580-3;F8W6L6;P35580-2;P35580;Q5BKV1;P35749-2;P35749;P35749-3;P35749-4;B1AH99;G8JLL9;Q7Z406-2;F2Z2U8;Q7Z406-6;Q7Z406;Q7Z406-4;Q7Z406-5;REV__Q9UKV3;REV__Q9UKV3-5;REV__E7EQT4;REV__S4R3H4;REV__Q08AF3;E7ERA5	Myosin-9	MYH9	>sp|P35579|MYH9_HUMAN Myosin-9 OS=Homo sapiens GN=MYH9 PE=1 SV=4;>sp|P35579-2|MYH9_HUMAN Isoform 2 of Myosin-9 OS=Homo sapiens GN=MYH9	259750000	256760000	202400000	198350000	395630000	369990000	46060000	51504000	55382000	42060000	38655000	41457000	113800000	114070000	65665000	82264000	62093000	49513000	40300000	67649000	53971000	71294000	39218000	48353000
P35813-3;P35813;P35813-2;E9PKB5;E9PJN3;E9PL75	Protein phosphatase 1A	PPM1A	>sp|P35813-3|PPM1A_HUMAN Isoform 3 of Protein phosphatase 1A OS=Homo sapiens GN=PPM1A;>sp|P35813|PPM1A_HUMAN Protein phosphatase 1A OS=Homo sapiens GN=PPM1A PE=1 SV=1;>sp|P35813-2|PPM1A_HUMAN Isoform Alpha-2 of Protein phosphatase 1A OS=Homo sapiens GN=PPM	9178900	33864000	11007000	1	9258800	1	8682700	1	1	1	1	6698200	11211000	1	6688800	1	3140000	1	3468200	1	16435000	1	1	1
P35908	Keratin, type II cytoskeletal 2 epidermal	KRT2	>sp|P35908|K22E_HUMAN Keratin, type II cytoskeletal 2 epidermal OS=Homo sapiens GN=KRT2 PE=1 SV=2	5541800000	5920500000	5732000000	5517900000	7733700000	7283900000	5349800000	4960400000	5814600000	5950900000	4300000000	4712000000	5393300000	5270600000	7149500000	7222600000	4664400000	4936600000	5400800000	5719400000	3522900000	3726400000	15204000000	15183000000
P35998;B7Z5E2;C9JLS9	26S protease regulatory subunit 7	PSMC2	>sp|P35998|PRS7_HUMAN 26S protease regulatory subunit 7 OS=Homo sapiens GN=PSMC2 PE=1 SV=3;>tr|B7Z5E2|B7Z5E2_HUMAN 26S protease regulatory subunit 7 OS=Homo sapiens GN=PSMC2 PE=2 SV=1	34572000	30985000	38522000	31211000	53074000	44967000	32129000	19963000	31638000	29571000	25652000	26804000	32262000	24183000	38751000	37088000	23772000	29430000	19499000	22048000	31477000	32005000	26759000	24632000
P36542;P36542-2;B4DL14	ATP synthase subunit gamma, mitochondrial;ATP synthase gamma chain	ATP5C1	>sp|P36542|ATPG_HUMAN ATP synthase subunit gamma, mitochondrial OS=Homo sapiens GN=ATP5C1 PE=1 SV=1;>sp|P36542-2|ATPG_HUMAN Isoform Heart of ATP synthase subunit gamma, mitochondrial OS=Homo sapiens GN=ATP5C1;>tr|B4DL14|B4DL14_HUMAN ATP synthase subunit ga	14675000	22329000	11182000	11372000	42596000	37374000	13803000	16447000	13470000	16079000	10229000	7331500	13113000	14343000	12402000	11338000	13355000	8825800	16850000	14336000	14127000	13160000	15286000	11782000
P36551;H0YA22	Coproporphyrinogen-III oxidase, mitochondrial	CPOX	>sp|P36551|HEM6_HUMAN Coproporphyrinogen-III oxidase, mitochondrial OS=Homo sapiens GN=CPOX PE=1 SV=3;>tr|H0YA22|H0YA22_HUMAN Coproporphyrinogen-III oxidase, mitochondrial (Fragment) OS=Homo sapiens GN=CPOX PE=4 SV=1	1	1	1	1	1	1	1	1	1	1	1	1	1	1	1	1	1	1	1	1	1	1	1	1
P36578;H3BM89;H3BTP7;H3BU31	60S ribosomal protein L4	RPL4	>sp|P36578|RL4_HUMAN 60S ribosomal protein L4 OS=Homo sapiens GN=RPL4 PE=1 SV=5;>tr|H3BM89|H3BM89_HUMAN 60S ribosomal protein L4 OS=Homo sapiens GN=RPL4 PE=2 SV=1	3480200000	3566700000	316180000	298210000	503650000	484990000	374110000	415500000	387560000	365030000	536440000	519740000	1234800000	1137600000	497980000	466120000	662570000	666500000	409340000	432080000	482980000	510690000	315000000	299340000
P37108;H0YLA2	Signal recognition particle 14 kDa protein	SRP14	>sp|P37108|SRP14_HUMAN Signal recognition particle 14 kDa protein OS=Homo sapiens GN=SRP14 PE=1 SV=2;>tr|H0YLA2|H0YLA2_HUMAN Signal recognition particle 14 kDa protein OS=Homo sapiens GN=SRP14 PE=2 SV=1	2060100	6552700	1898900	5069500	3409600	6142900	1	1137400	1	1335500	1	1	3046600	3524800	1802800	1741600	1858900	2403800	1	1	1594600	1322800	1159600	1149300
P38159;P38159-2;H3BT71;H0Y6E7;P38159-3;H3BR27;Q96E39;O75526;H3BNC1;Q8N7X1;H3BUY5;B3KRG5	RNA-binding motif protein, X chromosome;RNA-binding motif protein, X chromosome, N-terminally processed	RBMX	>sp|P38159|RBMX_HUMAN RNA-binding motif protein, X chromosome OS=Homo sapiens GN=RBMX PE=1 SV=3;>sp|P38159-2|RBMX_HUMAN Isoform 2 of RNA-binding motif protein, X chromosome OS=Homo sapiens GN=RBMX;>tr|H3BT71|H3BT71_HUMAN RNA-binding motif protein, X chromo	118370000	79063000	17259000	19483000	14813000	10178000	14335000	12734000	13377000	17836000	14432000	11957000	65145000	67925000	14440000	10505000	19019000	17336000	5473000	1	12325000	10041000	4737200	6349800
P38646;D6RJI2;D6RA73;H0YBG6	Stress-70 protein, mitochondrial	HSPA9	>sp|P38646|GRP75_HUMAN Stress-70 protein, mitochondrial OS=Homo sapiens GN=HSPA9 PE=1 SV=2	67864000	45824000	72430000	58237000	63167000	56857000	31583000	29259000	27047000	26681000	26418000	23108000	47898000	50068000	37213000	35685000	17600000	18818000	28192000	28637000	30424000	35543000	27126000	28199000
P38919	Eukaryotic initiation factor 4A-III	EIF4A3	>sp|P38919|IF4A3_HUMAN Eukaryotic initiation factor 4A-III OS=Homo sapiens GN=EIF4A3 PE=1 SV=4	1	1	2578900	1235700	2067200	1281900	1	1	1	1006800	1	1	937300	1159200	1	1	919420	932370	1	1	1	1063600	630800	1
P39019;M0R140;M0QYF7;M0QXK4;M0R2L9	40S ribosomal protein S19	RPS19	>sp|P39019|RS19_HUMAN 40S ribosomal protein S19 OS=Homo sapiens GN=RPS19 PE=1 SV=2	984210000	1017000000	136520000	160780000	227130000	215020000	134300000	144890000	144310000	149400000	186480000	191790000	613450000	636200000	211050000	190750000	291130000	227260000	135530000	126450000	161750000	193100000	105130000	121460000
P39023;G5E9G0;H7C422;B5MCW2;H7C3M2;F8WCR1;Q92901	60S ribosomal protein L3	RPL3	>sp|P39023|RL3_HUMAN 60S ribosomal protein L3 OS=Homo sapiens GN=RPL3 PE=1 SV=2;>tr|G5E9G0|G5E9G0_HUMAN 60S ribosomal protein L3 OS=Homo sapiens GN=RPL3 PE=2 SV=1;>tr|H7C422|H7C422_HUMAN 60S ribosomal protein L3 (Fragment) OS=Homo sapiens GN=RPL3 PE=2 SV=1	1514500000	1795500000	187270000	183070000	303620000	290100000	208120000	254980000	229110000	271000000	344940000	335050000	997020000	1180800000	305920000	313440000	464120000	530710000	201540000	226860000	289740000	301110000	200300000	205040000
P40227;B4DPJ8;P40227-2;J3KRI6	T-complex protein 1 subunit zeta	CCT6A	>sp|P40227|TCPZ_HUMAN T-complex protein 1 subunit zeta OS=Homo sapiens GN=CCT6A PE=1 SV=3;>tr|B4DPJ8|B4DPJ8_HUMAN T-complex protein 1 subunit zeta OS=Homo sapiens GN=CCT6A PE=2 SV=1;>sp|P40227-2|TCPZ_HUMAN Isoform 2 of T-complex protein 1 subunit zeta OS=H	188270000	248080000	213810000	217770000	289480000	251590000	120940000	105630000	149080000	124840000	84240000	97215000	159890000	157920000	119120000	115110000	98481000	97253000	84871000	91731000	119130000	119600000	116530000	126210000
P40429;M0QYS1;Q6NVV1;M0QZU1	60S ribosomal protein L13a	RPL13A	>sp|P40429|RL13A_HUMAN 60S ribosomal protein L13a OS=Homo sapiens GN=RPL13A PE=1 SV=2;>tr|M0QYS1|M0QYS1_HUMAN 60S ribosomal protein L13a (Fragment) OS=Homo sapiens GN=RPL13A PE=2 SV=2	1196000000	1166000000	109280000	96005000	167820000	182700000	124950000	140950000	127130000	119780000	181280000	166580000	654740000	559800000	181500000	181460000	227770000	241760000	120010000	112200000	182080000	165650000	103500000	93364000
P40926;E9PDB2;G3XAL0	Malate dehydrogenase, mitochondrial;Malate dehydrogenase	MDH2	>sp|P40926|MDHM_HUMAN Malate dehydrogenase, mitochondrial OS=Homo sapiens GN=MDH2 PE=1 SV=3;>tr|E9PDB2|E9PDB2_HUMAN Malate dehydrogenase, mitochondrial OS=Homo sapiens GN=MDH2 PE=2 SV=1;>tr|G3XAL0|G3XAL0_HUMAN Malate dehydrogenase OS=Homo sapiens GN=MDH2 P	26728000	41321000	11821000	17142000	5391900	8173000	1	1	1	1	1	1	10954000	8634000	2210200	2173500	1	1	1922100	1	4190500	1	1	1
P41091;Q2VIR3;F8W810;Q2VIR3-2;H7BZU1	Eukaryotic translation initiation factor 2 subunit 3;Putative eukaryotic translation initiation factor 2 subunit 3-like protein	EIF2S3;EIF2S3L	>sp|P41091|IF2G_HUMAN Eukaryotic translation initiation factor 2 subunit 3 OS=Homo sapiens GN=EIF2S3 PE=1 SV=3;>sp|Q2VIR3|IF2GL_HUMAN Putative eukaryotic translation initiation factor 2 subunit 3-like protein OS=Homo sapiens GN=EIF2S3L PE=5 SV=2;>tr|F8W810	26684000	20947000	31257000	51036000	7396700	21122000	5656600	47909000	46601000	5686800	20792000	24979000	46815000	29150000	22042000	27217000	20973000	18470000	47374000	52249000	6363000	5947800	17507000	5455600
P41252;J3KR24;Q5TCC4	Isoleucine--tRNA ligase, cytoplasmic	IARS	>sp|P41252|SYIC_HUMAN Isoleucine--tRNA ligase, cytoplasmic OS=Homo sapiens GN=IARS PE=1 SV=2;>tr|J3KR24|J3KR24_HUMAN Isoleucine--tRNA ligase, cytoplasmic OS=Homo sapiens GN=IARS PE=2 SV=1;>tr|Q5TCC4|Q5TCC4_HUMAN Isoleucine--tRNA ligase, cytoplasmic (Fragme	1	1967900	1348400	1	3494600	1	1	1	1	1	1	1	1182700	1	1	1	1	1	1	1	1	1	1	1
P42167;G5E972;P42167-2;P42166;A2T926;H0YJH7	Lamina-associated polypeptide 2, isoforms beta/gamma;Thymopoietin;Thymopentin;Lamina-associated polypeptide 2, isoform alpha;Thymopoietin;Thymopentin	TMPO	>sp|P42167|LAP2B_HUMAN Lamina-associated polypeptide 2, isoforms beta/gamma OS=Homo sapiens GN=TMPO PE=1 SV=2;>tr|G5E972|G5E972_HUMAN Thymopentin OS=Homo sapiens GN=TMPO PE=2 SV=1;>sp|P42167-2|LAP2B_HUMAN Isoform Gamma of Lamina-associated polypeptide 2, i	97106000	107460000	120090000	114190000	108890000	99089000	124430000	129120000	127790000	115120000	115750000	117210000	96197000	92137000	114990000	121510000	114380000	115410000	120990000	108440000	156080000	160230000	123800000	112040000
P42677;Q5T4L4;C9J1C5	40S ribosomal protein S27	RPS27	>sp|P42677|RS27_HUMAN 40S ribosomal protein S27 OS=Homo sapiens GN=RPS27 PE=1 SV=3;>tr|Q5T4L4|Q5T4L4_HUMAN 40S ribosomal protein S27 OS=Homo sapiens GN=RPS27 PE=2 SV=1	261000000	279710000	37156000	43914000	96846000	101440000	58193000	47912000	53936000	80950000	55149000	63259000	134240000	177380000	55580000	57857000	101910000	114900000	53135000	40782000	31985000	26503000	50240000	46199000
P42704;B8ZZ38;C9JCA9;Q9NP80;J3KPL1;Q9NP80-2;Q9NP80-3;H7C3W8	Leucine-rich PPR motif-containing protein, mitochondrial	LRPPRC	>sp|P42704|LPPRC_HUMAN Leucine-rich PPR motif-containing protein, mitochondrial OS=Homo sapiens GN=LRPPRC PE=1 SV=3	904780000	997250000	1641800000	1690600000	144830000	176510000	906120000	869680000	1085200000	955810000	740500000	718740000	933740000	804480000	1069800000	1083100000	1146600000	1100700000	1028100000	1024800000	328130000	317230000	1041400000	1069800000
P42766;F2Z388	60S ribosomal protein L35	RPL35	>sp|P42766|RL35_HUMAN 60S ribosomal protein L35 OS=Homo sapiens GN=RPL35 PE=1 SV=2;>tr|F2Z388|F2Z388_HUMAN 60S ribosomal protein L35 OS=Homo sapiens GN=RPL35 PE=2 SV=1	608660000	554150000	62772000	80167000	120940000	131310000	68546000	76191000	79585000	98502000	111140000	109950000	518570000	530600000	122950000	108890000	225810000	231160000	87237000	87670000	127090000	109750000	90926000	78997000
P43487;C9JGV6;B3KUP2;C9JJ34;C9JXG8;H7C137;C9JDM3	Ran-specific GTPase-activating protein	RANBP1	>sp|P43487|RANG_HUMAN Ran-specific GTPase-activating protein OS=Homo sapiens GN=RANBP1 PE=1 SV=1;>tr|C9JGV6|C9JGV6_HUMAN Ran-specific GTPase-activating protein (Fragment) OS=Homo sapiens GN=RANBP1 PE=2 SV=1;>tr|B3KUP2|B3KUP2_HUMAN RAN binding protein 1, is	4408400	2517600	7561200	6127100	4092600	3349900	1	1	3083700	1	1	4293400	3954600	4065800	1	1	1	1	1	1	1	1	1	3513400
P43490;Q5SYT8;F5H246	Nicotinamide phosphoribosyltransferase	NAMPT;RP11-92J19.4;NAMPTL	>sp|P43490|NAMPT_HUMAN Nicotinamide phosphoribosyltransferase OS=Homo sapiens GN=NAMPT PE=1 SV=1;>tr|Q5SYT8|Q5SYT8_HUMAN Protein NAMPTL (Fragment) OS=Homo sapiens GN=NAMPTL PE=2 SV=1;>tr|F5H246|F5H246_HUMAN Protein NAMPTL OS=Homo sapiens GN=NAMPTL PE=2 SV=	7267200	4953900	3396000	4567000	11193000	11931000	1	5109900	1	1	1	1	4721100	3413400	5797200	4730300	4549000	1	1	1	1	1	1	1
P43686;P43686-2	26S protease regulatory subunit 6B	PSMC4	>sp|P43686|PRS6B_HUMAN 26S protease regulatory subunit 6B OS=Homo sapiens GN=PSMC4 PE=1 SV=2;>sp|P43686-2|PRS6B_HUMAN Isoform 2 of 26S protease regulatory subunit 6B OS=Homo sapiens GN=PSMC4	12631000	7612700	12677000	13022000	24902000	20863000	13166000	11771000	16553000	11478000	12580000	12958000	15436000	9809500	15380000	13398000	11539000	12617000	12344000	12050000	13733000	16967000	10666000	11302000
P46776;E9PLL6;E9PJD9;E9PLX7;H0YF34;E9PKT2	60S ribosomal protein L27a	RPL27A	>sp|P46776|RL27A_HUMAN 60S ribosomal protein L27a OS=Homo sapiens GN=RPL27A PE=1 SV=2;>tr|E9PLL6|E9PLL6_HUMAN 60S ribosomal protein L27a OS=Homo sapiens GN=RPL27A PE=2 SV=1;>tr|E9PJD9|E9PJD9_HUMAN 60S ribosomal protein L27a OS=Homo sapiens GN=RPL27A PE=2 S	1349100000	1503800000	110910000	120590000	315060000	310500000	170350000	160000000	167600000	122660000	209410000	196600000	679970000	645190000	200550000	211700000	249860000	224430000	139620000	139850000	204090000	180430000	120340000	146460000
P46777;Q5T7N0;R4GNJ2	60S ribosomal protein L5	RPL5	>sp|P46777|RL5_HUMAN 60S ribosomal protein L5 OS=Homo sapiens GN=RPL5 PE=1 SV=3	931960000	800150000	180930000	173750000	161110000	142390000	166500000	147520000	137780000	195660000	160520000	164230000	556050000	342880000	185340000	169110000	200180000	192070000	173180000	155010000	190030000	203790000	88032000	91482000
P46778;M0R181;G3V1B3;M0R3I5	60S ribosomal protein L21	RPL21	>sp|P46778|RL21_HUMAN 60S ribosomal protein L21 OS=Homo sapiens GN=RPL21 PE=1 SV=2;>tr|M0R181|M0R181_HUMAN 60S ribosomal protein L21 (Fragment) OS=Homo sapiens GN=RPL21 PE=4 SV=1;>tr|G3V1B3|G3V1B3_HUMAN 60S ribosomal protein L21 OS=Homo sapiens GN=RPL21 PE	10696000000	15668000000	1646500000	1974200000	3665300000	3724800000	2028500000	2608300000	2691900000	2088600000	3390600000	3466700000	7617700000	8992600000	3025700000	2574800000	2871800000	3020100000	2383900000	2686700000	2622700000	2637300000	1554900000	1900500000
P46779;H0YKD8;P46779-3;P46779-2;H0YMF4;P46779-5;P46779-4;H0YLP6	60S ribosomal protein L28	RPL28	>sp|P46779|RL28_HUMAN 60S ribosomal protein L28 OS=Homo sapiens GN=RPL28 PE=1 SV=3;>tr|H0YKD8|H0YKD8_HUMAN 60S ribosomal protein L28 OS=Homo sapiens GN=RPL28 PE=2 SV=1;>sp|P46779-3|RL28_HUMAN Isoform 3 of 60S ribosomal protein L28 OS=Homo sapiens GN=RPL28;	560650000	556610000	48378000	59381000	106470000	116500000	78735000	68041000	64954000	82909000	91407000	96138000	455240000	469970000	108420000	97821000	165090000	159480000	78824000	60643000	96634000	88594000	62042000	59105000
P46781;C9JM19;B5MCT8;A8MXK4;F2Z3C0	40S ribosomal protein S9	RPS9	>sp|P46781|RS9_HUMAN 40S ribosomal protein S9 OS=Homo sapiens GN=RPS9 PE=1 SV=3;>tr|C9JM19|C9JM19_HUMAN 40S ribosomal protein S9 OS=Homo sapiens GN=RPS9 PE=2 SV=1;>tr|B5MCT8|B5MCT8_HUMAN 40S ribosomal protein S9 OS=Homo sapiens GN=RPS9 PE=2 SV=1	2904100000	2835900000	273420000	299720000	474340000	517470000	254120000	254710000	276640000	252000000	310000000	285800000	1197600000	1110100000	303650000	310290000	497810000	501020000	283310000	280080000	278510000	283720000	177440000	200620000
P46782;M0R0F0;M0R0R2;M0QZN2	40S ribosomal protein S5;40S ribosomal protein S5, N-terminally processed	RPS5	>sp|P46782|RS5_HUMAN 40S ribosomal protein S5 OS=Homo sapiens GN=RPS5 PE=1 SV=4;>tr|M0R0F0|M0R0F0_HUMAN 40S ribosomal protein S5 (Fragment) OS=Homo sapiens GN=RPS5 PE=2 SV=1;>tr|M0R0R2|M0R0R2_HUMAN 40S ribosomal protein S5 OS=Homo sapiens GN=RPS5 PE=2 SV=1	321470000	411360000	88446000	100220000	136090000	136990000	68110000	50081000	69878000	61340000	188220000	122290000	242720000	172910000	115800000	117270000	197480000	196070000	168130000	81950000	89344000	83595000	83003000	109050000
P46783;S4R435;F6U211;Q9NQ39	40S ribosomal protein S10	RPS10	>sp|P46783|RS10_HUMAN 40S ribosomal protein S10 OS=Homo sapiens GN=RPS10 PE=1 SV=1;>tr|S4R435|S4R435_HUMAN Protein RPS10-NUDT3 (Fragment) OS=Homo sapiens GN=RPS10-NUDT3 PE=3 SV=1;>tr|F6U211|F6U211_HUMAN 40S ribosomal protein S10 OS=Homo sapiens GN=RPS10 PE	591140000	499940000	100810000	109540000	103610000	106890000	114950000	120800000	99178000	104710000	190150000	185850000	469610000	474060000	172100000	134750000	273430000	196930000	154930000	198490000	132330000	141400000	90218000	106200000
P46939-2;P46939;Q5T097	Utrophin	UTRN	>sp|P46939-2|UTRO_HUMAN Isoform 2 of Utrophin OS=Homo sapiens GN=UTRN;>sp|P46939|UTRO_HUMAN Utrophin OS=Homo sapiens GN=UTRN PE=1 SV=2;>tr|Q5T097|Q5T097_HUMAN Utrophin OS=Homo sapiens GN=UTRN PE=2 SV=1	1	1	1	1	1	1	1	1	1	1	1	1	1	1	1	1	1	1	1	1	1	1	1	1
P46940;H0YLE8	Ras GTPase-activating-like protein IQGAP1	IQGAP1	>sp|P46940|IQGA1_HUMAN Ras GTPase-activating-like protein IQGAP1 OS=Homo sapiens GN=IQGAP1 PE=1 SV=1;>tr|H0YLE8|H0YLE8_HUMAN Ras GTPase-activating-like protein IQGAP1 OS=Homo sapiens GN=IQGAP1 PE=2 SV=1	3528500	1801500	1904200	1873000	4011500	3901500	1261200	2829100	1	1177200	1	710300	8582000	6273100	4093300	3653600	7943400	2593800	2095600	5027100	2889600	1893500	1	1
P47895;H0Y2X5;H0YKF9;H0YNQ3	Aldehyde dehydrogenase family 1 member A3	ALDH1A3	>sp|P47895|AL1A3_HUMAN Aldehyde dehydrogenase family 1 member A3 OS=Homo sapiens GN=ALDH1A3 PE=1 SV=2;>tr|H0Y2X5|H0Y2X5_HUMAN Aldehyde dehydrogenase 1 family, member A3, isoform CRA_b OS=Homo sapiens GN=ALDH1A3 PE=2 SV=1;>tr|H0YKF9|H0YKF9_HUMAN Aldehyde de	4171800	3977200	2959600	3092300	3642200	3695300	1	1	1	1	1	1	1344000	1	1	1	1	1	1	1	1	1	1	1
P47897;B4DWJ2;H7C0R3	Glutamine--tRNA ligase	QARS	>sp|P47897|SYQ_HUMAN Glutamine--tRNA ligase OS=Homo sapiens GN=QARS PE=1 SV=1;>tr|B4DWJ2|B4DWJ2_HUMAN Glutamine--tRNA ligase OS=Homo sapiens GN=QARS PE=2 SV=1;>tr|H7C0R3|H7C0R3_HUMAN Glutamine--tRNA ligase (Fragment) OS=Homo sapiens GN=QARS PE=2 SV=1	1	1781000	1889900	2413900	3851600	3929400	1	1	1	1	1	1	1526000	1	1	1	1	1	1	1	1	1	1	1
P47914	60S ribosomal protein L29	RPL29	>sp|P47914|RL29_HUMAN 60S ribosomal protein L29 OS=Homo sapiens GN=RPL29 PE=1 SV=2	99438000	94117000	9432200	8608400	14537000	16774000	14516000	13351000	11484000	16501000	16715000	16091000	80817000	87358000	17256000	15932000	29328000	32860000	15639000	15349000	28999000	19951000	9296000	9199300
P47929	Galectin-7	LGALS7	>sp|P47929|LEG7_HUMAN Galectin-7 OS=Homo sapiens GN=LGALS7 PE=1 SV=2	12154000	22845000	1250900	1238500	1074100	1207600	1311200	1033200	1546600	1144500	791950	1	1471500	1346800	1348500	1460400	1028000	1075000	1617100	1120100	1418700	1401900	1881900	2027800
P47989	Xanthine dehydrogenase/oxidase;Xanthine dehydrogenase;Xanthine oxidase	XDH	>sp|P47989|XDH_HUMAN Xanthine dehydrogenase/oxidase OS=Homo sapiens GN=XDH PE=1 SV=4	28986000	41017000	37002000	49882000	57134000	68313000	85336000	79151000	66754000	58317000	68774000	63151000	47356000	27103000	57637000	55161000	53425000	56287000	66367000	72731000	77770000	71054000	49890000	55322000
P48047;H7C086	ATP synthase subunit O, mitochondrial	ATP5O	>sp|P48047|ATPO_HUMAN ATP synthase subunit O, mitochondrial OS=Homo sapiens GN=ATP5O PE=1 SV=1;>tr|H7C086|H7C086_HUMAN ATP synthase subunit O, mitochondrial (Fragment) OS=Homo sapiens GN=ATP5O PE=4 SV=1	13219000	14152000	6904700	7051200	11128000	9227700	9999000	11659000	12027000	9899800	9208900	5873400	9635400	10272000	8066000	7561200	10081000	11460000	9855500	13291000	10760000	11056000	13499000	10500000
P48556;R4GMR5;K7EJR3;K7EJC1;K7ERW6;K7ENY6	26S proteasome non-ATPase regulatory subunit 8	PSMD8	>sp|P48556|PSMD8_HUMAN 26S proteasome non-ATPase regulatory subunit 8 OS=Homo sapiens GN=PSMD8 PE=1 SV=2;>tr|R4GMR5|R4GMR5_HUMAN 26S proteasome non-ATPase regulatory subunit 8 OS=Homo sapiens GN=PSMD8 PE=4 SV=1;>tr|K7EJR3|K7EJR3_HUMAN 26S proteasome non-AT	4179000	3868200	4441700	3886800	5478000	4119900	1	1	3228800	2844100	1	1	4623700	3810400	1	1	1	1	2740600	2921700	1	1	1	1
P48643;E9PCA1;B7ZAR1;E7ENZ3;B4DYD8;H0Y914;D6RIZ7	T-complex protein 1 subunit epsilon	CCT5	>sp|P48643|TCPE_HUMAN T-complex protein 1 subunit epsilon OS=Homo sapiens GN=CCT5 PE=1 SV=1;>tr|E9PCA1|E9PCA1_HUMAN T-complex protein 1 subunit epsilon OS=Homo sapiens GN=CCT5 PE=2 SV=1;>tr|B7ZAR1|B7ZAR1_HUMAN T-complex protein 1 subunit epsilon OS=Homo sa	527480000	453380000	569870000	560350000	956250000	834710000	370260000	349340000	410600000	351260000	323740000	336160000	376590000	368800000	407050000	405240000	365900000	360150000	278730000	264610000	354920000	356800000	360160000	353940000
P49207	60S ribosomal protein L34	RPL34	>sp|P49207|RL34_HUMAN 60S ribosomal protein L34 OS=Homo sapiens GN=RPL34 PE=1 SV=3	311070000	283560000	77382000	73441000	121150000	104730000	116990000	117470000	131180000	134780000	136130000	135690000	397140000	419320000	135620000	146990000	167090000	179540000	119070000	120120000	131390000	138140000	95145000	83982000
P49321-3;P49321;P49321-4;P49321-2;Q5T624;H0YF33;E9PRH9;E9PI86;H0YDS9	Nuclear autoantigenic sperm protein	NASP	>sp|P49321-3|NASP_HUMAN Isoform 3 of Nuclear autoantigenic sperm protein OS=Homo sapiens GN=NASP;>sp|P49321|NASP_HUMAN Nuclear autoantigenic sperm protein OS=Homo sapiens GN=NASP PE=1 SV=2;>sp|P49321-4|NASP_HUMAN Isoform 4 of Nuclear autoantigenic sperm pr	4224900	4288000	5199800	6862000	5121400	5390800	2237300	2802000	2553500	3305600	1	1	3034500	3576000	2130600	2061900	1	2354600	1	1	2204800	1	3330300	1
P49327	Fatty acid synthase;[Acyl-carrier-protein] S-acetyltransferase;[Acyl-carrier-protein] S-malonyltransferase;3-oxoacyl-[acyl-carrier-protein] synthase;3-oxoacyl-[acyl-carrier-protein] reductase;3-hydroxypalmitoyl-[acyl-carrier-protein] dehydratase;Enoyl-[acyl-carrier-protein] reductase;Oleoyl-[acyl-carrier-protein] hydrolase	FASN	>sp|P49327|FAS_HUMAN Fatty acid synthase OS=Homo sapiens GN=FASN PE=1 SV=3	139490000	163400000	136490000	136740000	173350000	173070000	44223000	59984000	35544000	42189000	36248000	29393000	77278000	84537000	35814000	42022000	37977000	28798000	48228000	45106000	35741000	55014000	33028000	37225000
P49354;E9PQP6;H0YE66;P49354-2;B3KVN2;H0YCW1;E9PPM9;E9PN85	Protein farnesyltransferase/geranylgeranyltransferase type-1 subunit alpha	FNTA	>sp|P49354|FNTA_HUMAN Protein farnesyltransferase/geranylgeranyltransferase type-1 subunit alpha OS=Homo sapiens GN=FNTA PE=1 SV=1;>tr|E9PQP6|E9PQP6_HUMAN Protein farnesyltransferase/geranylgeranyltransferase type-1 subunit alpha (Fragment) OS=Homo sapiens	5097700	23939000	1314200	2891700	4089900	1	796930000	768270000	531210000	470550000	606280000	545530000	1358200000	1169100000	1921800000	1625600000	1753000000	1770400000	856420000	770440000	712850000	768880000	480480000	501360000
P49356;H0YHI0;B4DL54;B4E1A0;B3KSC2	Protein farnesyltransferase subunit beta	FNTB;CHURC1-FNTB	>sp|P49356|FNTB_HUMAN Protein farnesyltransferase subunit beta OS=Homo sapiens GN=FNTB PE=1 SV=1;>tr|H0YHI0|H0YHI0_HUMAN Protein CHURC1-FNTB (Fragment) OS=Homo sapiens GN=CHURC1-FNTB PE=2 SV=1;>tr|B4DL54|B4DL54_HUMAN Protein CHURC1-FNTB OS=Homo sapiens GN=	6809700	4657300	1	1	1592900	1	515640000	494890000	392820000	342050000	346940000	305900000	781920000	836660000	1212100000	1030800000	1175400000	1075500000	469530000	459150000	476310000	445350000	300210000	319610000
P49368;P49368-2;B4DUR8;Q5SZX6;E9PRC8;Q5SZW8;E9PQ35;E9PM09;Q5SZX9	T-complex protein 1 subunit gamma	CCT3	>sp|P49368|TCPG_HUMAN T-complex protein 1 subunit gamma OS=Homo sapiens GN=CCT3 PE=1 SV=4;>sp|P49368-2|TCPG_HUMAN Isoform 2 of T-complex protein 1 subunit gamma OS=Homo sapiens GN=CCT3;>tr|B4DUR8|B4DUR8_HUMAN T-complex protein 1 subunit gamma OS=Homo sapie	1308200000	1241800000	1210100000	1268800000	1662100000	1749800000	616340000	589710000	713310000	700930000	536060000	540680000	914320000	851370000	721510000	710250000	604830000	600030000	576690000	571830000	626970000	644560000	604540000	716620000
P49411;H3BNU3	Elongation factor Tu, mitochondrial	TUFM	>sp|P49411|EFTU_HUMAN Elongation factor Tu, mitochondrial OS=Homo sapiens GN=TUFM PE=1 SV=2	165400000	126530000	140680000	132890000	358020000	345850000	144030000	138740000	125410000	128460000	144680000	144930000	124750000	119940000	142580000	128310000	119560000	111460000	126130000	132090000	203570000	226900000	127340000	138700000
P49756;P49756-3;P49756-2;H0YE46	RNA-binding protein 25	RBM25	>sp|P49756|RBM25_HUMAN RNA-binding protein 25 OS=Homo sapiens GN=RBM25 PE=1 SV=3;>sp|P49756-3|RBM25_HUMAN Isoform 3 of RNA-binding protein 25 OS=Homo sapiens GN=RBM25;>sp|P49756-2|RBM25_HUMAN Isoform 2 of RNA-binding protein 25 OS=Homo sapiens GN=RBM25;>tr	1	4087300	4205900	3643700	3708300	5438000	6780900	4659700	5237600	5356300	3965300	4834600	5689600	5728500	5344100	7996200	7261300	7417400	5241300	4462800	5019200	3692700	6115400	2919600
P49902;B7Z382;Q5JUV6;Q5JUV4;Q5JUV3;H0YHR8	Cytosolic purine 5-nucleotidase	NT5C2	>sp|P49902|5NTC_HUMAN Cytosolic purine 5-nucleotidase OS=Homo sapiens GN=NT5C2 PE=1 SV=1;>tr|B7Z382|B7Z382_HUMAN Cytosolic purine 5-nucleotidase OS=Homo sapiens GN=NT5C2 PE=2 SV=1;>tr|Q5JUV6|Q5JUV6_HUMAN Cytosolic purine 5-nucleotidase (Fragment) OS=Hom	13861000	11098000	12050000	17396000	15173000	13717000	1	4505800	1	5424800	1	1	3751900	16046000	1	1	1	6435600	1	1	8700700	1	1	1
P50402;Q5HY57	Emerin	EMD	>sp|P50402|EMD_HUMAN Emerin OS=Homo sapiens GN=EMD PE=1 SV=1;>tr|Q5HY57|Q5HY57_HUMAN Emerin OS=Homo sapiens GN=EMD PE=2 SV=1	1	1	611150	463420	1967900	2172100	1449500	1	1	736310	1	1	1	1	6553400	523490	499240	1	1	1	640300	909220	1	1075700
P50454;E9PKH2;E9PPV6;E9PR70;E9PMI5;E9PK86;E9PNX1;E9PRS3;E9PIG2;E9PJH8;E9PQ34;H0YEP8	Serpin H1	SERPINH1	>sp|P50454|SERPH_HUMAN Serpin H1 OS=Homo sapiens GN=SERPINH1 PE=1 SV=2;>tr|E9PKH2|E9PKH2_HUMAN Serpin H1 OS=Homo sapiens GN=SERPINH1 PE=2 SV=1;>tr|E9PPV6|E9PPV6_HUMAN Serpin H1 OS=Homo sapiens GN=SERPINH1 PE=2 SV=1;>tr|E9PR70|E9PR70_HUMAN Serpin H1 (Fragme	14876000	25891000	13472000	31005000	108430000	81968000	2686800	3225900	5591000	2187200	4808400	4133700	9803700	6974000	1	2259000	1499100	1	6580500	6840600	1	1	4759800	1
P50502;Q8IZP2;H7C3I1;F6VDH7;Q8NFI4	Hsc70-interacting protein;Putative protein FAM10A4	ST13;ST13P4	>sp|P50502|F10A1_HUMAN Hsc70-interacting protein OS=Homo sapiens GN=ST13 PE=1 SV=2;>sp|Q8IZP2|ST134_HUMAN Putative protein FAM10A4 OS=Homo sapiens GN=ST13P4 PE=5 SV=1;>tr|H7C3I1|H7C3I1_HUMAN Hsc70-interacting protein (Fragment) OS=Homo sapiens GN=ST13 PE=4	19896000	10063000	10480000	10247000	7475500	7820900	1	1	1	1	1	1	5296800	6969500	1	1	1	1	1	1	1	1	1	1
P50750-2;P50750	Cyclin-dependent kinase 9	CDK9	>sp|P50750-2|CDK9_HUMAN Isoform 2 of Cyclin-dependent kinase 9 OS=Homo sapiens GN=CDK9;>sp|P50750|CDK9_HUMAN Cyclin-dependent kinase 9 OS=Homo sapiens GN=CDK9 PE=1 SV=3	2381100	2397000	2199800	2775200	1	2188800	1	3125600	1	1	4073900	2888900	2110400	2281300	1	2533200	1	1	2810600	2790900	1	2917400	2195400	1832100
P50914;E7EPB3	60S ribosomal protein L14	RPL14	>sp|P50914|RL14_HUMAN 60S ribosomal protein L14 OS=Homo sapiens GN=RPL14 PE=1 SV=4;>tr|E7EPB3|E7EPB3_HUMAN 60S ribosomal protein L14 OS=Homo sapiens GN=RPL14 PE=2 SV=1	685800000	678640000	58490000	65396000	102510000	104750000	81813000	88672000	73112000	84710000	109110000	132180000	280840000	392660000	120860000	102850000	177610000	180900000	94139000	77220000	103650000	89883000	63529000	61651000
P50990;B4DEM7;B4DQH4;H7C4C8;H7C2U0	T-complex protein 1 subunit theta	CCT8	>sp|P50990|TCPQ_HUMAN T-complex protein 1 subunit theta OS=Homo sapiens GN=CCT8 PE=1 SV=4;>tr|B4DEM7|B4DEM7_HUMAN T-complex protein 1 subunit theta OS=Homo sapiens GN=CCT8 PE=2 SV=1;>tr|B4DQH4|B4DQH4_HUMAN T-complex protein 1 subunit theta OS=Homo sapiens	393650000	416920000	446530000	474590000	473790000	482540000	280770000	239410000	283430000	282900000	250980000	282210000	360450000	313840000	266470000	257710000	222080000	208790000	216930000	247900000	252710000	250500000	277930000	274970000
P50991;P50991-2;B7Z9L0;B7Z2F4	T-complex protein 1 subunit delta	CCT4	>sp|P50991|TCPD_HUMAN T-complex protein 1 subunit delta OS=Homo sapiens GN=CCT4 PE=1 SV=4;>sp|P50991-2|TCPD_HUMAN Isoform 2 of T-complex protein 1 subunit delta OS=Homo sapiens GN=CCT4;>tr|B7Z9L0|B7Z9L0_HUMAN T-complex protein 1 subunit delta OS=Homo sapie	96967000	139620000	157110000	190130000	207830000	190430000	94668000	85660000	81763000	82931000	69730000	81074000	101400000	105320000	96936000	103700000	74092000	71915000	50747000	51012000	82337000	95496000	75130000	100760000
P51114;B4DXZ6;P51114-2;P51114-3;E9PFF5;E7EU85;P51116	Fragile X mental retardation syndrome-related protein 1;Fragile X mental retardation syndrome-related protein 2	FXR1;FXR2	>sp|P51114|FXR1_HUMAN Fragile X mental retardation syndrome-related protein 1 OS=Homo sapiens GN=FXR1 PE=1 SV=3;>tr|B4DXZ6|B4DXZ6_HUMAN Fragile X mental retardation syndrome-related protein 1 OS=Homo sapiens GN=FXR1 PE=2 SV=1;>sp|P51114-2|FXR1_HUMAN Isofor	5349100	6721900	13672000	9724300	12863000	10788000	8199100	8433500	9743400	7817000	9922100	7822100	13075000	11477000	6448900	7705900	4951100	5778500	10470000	10255000	11011000	8376200	9089800	10613000
P51665;H3BTM8;H3BNT7;H3BQV2	26S proteasome non-ATPase regulatory subunit 7	PSMD7	>sp|P51665|PSMD7_HUMAN 26S proteasome non-ATPase regulatory subunit 7 OS=Homo sapiens GN=PSMD7 PE=1 SV=2;>tr|H3BTM8|H3BTM8_HUMAN 26S proteasome non-ATPase regulatory subunit 7 OS=Homo sapiens GN=PSMD7 PE=2 SV=1;>tr|H3BNT7|H3BNT7_HUMAN 26S proteasome non-AT	70054000	17990000	34165000	30573000	39187000	33180000	19948000	15624000	22056000	27344000	19357000	15912000	21490000	22715000	24576000	19604000	19793000	17569000	43424000	22473000	16049000	16987000	15577000	19640000
P51991;P51991-2	Heterogeneous nuclear ribonucleoprotein A3	HNRNPA3	>sp|P51991|ROA3_HUMAN Heterogeneous nuclear ribonucleoprotein A3 OS=Homo sapiens GN=HNRNPA3 PE=1 SV=2;>sp|P51991-2|ROA3_HUMAN Isoform 2 of Heterogeneous nuclear ribonucleoprotein A3 OS=Homo sapiens GN=HNRNPA3	7276400	11053000	7558900	7669000	9547800	8230400	7151200	6939700	11286000	11219000	7166800	7399700	5792100	7672500	7394400	1	7451900	9289100	1	1	8335400	9383600	1	1
P52272;P52272-2;M0QZM1;M0R2T0;M0R019;M0R2I7;M0QY96;M0R0N3;M0QYQ7;M0QYL3	Heterogeneous nuclear ribonucleoprotein M	HNRNPM	>sp|P52272|HNRPM_HUMAN Heterogeneous nuclear ribonucleoprotein M OS=Homo sapiens GN=HNRNPM PE=1 SV=3;>sp|P52272-2|HNRPM_HUMAN Isoform 2 of Heterogeneous nuclear ribonucleoprotein M OS=Homo sapiens GN=HNRNPM;>tr|M0QZM1|M0QZM1_HUMAN Heterogeneous nuclear rib	17687000	13356000	25577000	36605000	55087000	44694000	16112000	42800000	30583000	37869000	31646000	25455000	34247000	27058000	25075000	37807000	28822000	26551000	31136000	20594000	32288000	40941000	18878000	25315000
P52306-5;P52306-4;P52306-3;P52306-6;D6REZ0;H0Y8M2;D6RC85			>sp|P52306-5|GDS1_HUMAN Isoform 5 of Rap1 GTPase-GDP dissociation stimulator 1 OS=Homo sapiens GN=RAP1GDS1;>sp|P52306-4|GDS1_HUMAN Isoform 4 of Rap1 GTPase-GDP dissociation stimulator 1 OS=Homo sapiens GN=RAP1GDS1;>sp|P52306-3|GDS1_HUMAN Isoform 3 of Rap1	1	3658200	1	1	1	1	18847000	18651000	7694000	11300000	6476700	12437000	35673000	40270000	63706000	70162000	77722000	75298000	5110200	1	10667000	14990000	7729600	4982400
P52597	Heterogeneous nuclear ribonucleoprotein F;Heterogeneous nuclear ribonucleoprotein F, N-terminally processed	HNRNPF	>sp|P52597|HNRPF_HUMAN Heterogeneous nuclear ribonucleoprotein F OS=Homo sapiens GN=HNRNPF PE=1 SV=3	40552000	32984000	42246000	35594000	58217000	42494000	29120000	23251000	21460000	24115000	29687000	31106000	31171000	34803000	31267000	26015000	20481000	27823000	22832000	20497000	19570000	20291000	17751000	9192800
P52732;REV__Q58F21-2;REV__Q58F21-3;REV__Q58F21;REV__Q58F21-4;REV__Q58F21-5;REV__C9JJU3	Kinesin-like protein KIF11	KIF11	>sp|P52732|KIF11_HUMAN Kinesin-like protein KIF11 OS=Homo sapiens GN=KIF11 PE=1 SV=2	2193800000	2310300000	3724900000	3810900000	1180400000	1150300000	5847300000	5974900000	5278400000	5335200000	5358600000	5265700000	1999400000	1965700000	3136800000	3179700000	3666000000	3678900000	5500000000	5764800000	6845900000	6597900000	4616900000	4632600000
P52756;P52756-5;P52756-2;P52756-4;C9JFQ5;C9J9P7	RNA-binding protein 5	RBM5	>sp|P52756|RBM5_HUMAN RNA-binding protein 5 OS=Homo sapiens GN=RBM5 PE=1 SV=2	5649900	4938900	7713000	4824800	6399700	4462300	8283600	11647000	7386200	7226600	7985800	5959600	9521100	7023000	6489300	7579100	9129200	8308800	11804000	11018000	1	1	7623000	9240600
P52907	F-actin-capping protein subunit alpha-1	CAPZA1	>sp|P52907|CAZA1_HUMAN F-actin-capping protein subunit alpha-1 OS=Homo sapiens GN=CAPZA1 PE=1 SV=3	21011000	16422000	13948000	23320000	15170000	16027000	19857000	20997000	1	1	22082000	22619000	1	1	15120000	12217000	1	1	25196000	1	4416200	1	1	1
P53007;B4DP62	Tricarboxylate transport protein, mitochondrial	SLC25A1	>sp|P53007|TXTP_HUMAN Tricarboxylate transport protein, mitochondrial OS=Homo sapiens GN=SLC25A1 PE=1 SV=2	7904000	9390500	5802400	5638900	11372000	13923000	1	1	4394700	1	3526100	1	7295400	5703100	6328000	5114500	1	1	1	3691300	4728700	2905100	4940800	4800700
P53985;Q5T8R5;Q49A45;Q5T8R3	Monocarboxylate transporter 1	SLC16A1	>sp|P53985|MOT1_HUMAN Monocarboxylate transporter 1 OS=Homo sapiens GN=SLC16A1 PE=1 SV=3;>tr|Q5T8R5|Q5T8R5_HUMAN Monocarboxylate transporter 1 (Fragment) OS=Homo sapiens GN=SLC16A1 PE=2 SV=1;>tr|Q49A45|Q49A45_HUMAN Monocarboxylate transporter 1 OS=Homo sap	5214000	3644000	1	1	5641900	1	4222900	4892600	1	1	4179300	4838000	7560400	5546300	7804900	5669500	1	1	1	1	4696700	3993800	1	1
P53999	Activated RNA polymerase II transcriptional coactivator p15	SUB1	>sp|P53999|TCP4_HUMAN Activated RNA polymerase II transcriptional coactivator p15 OS=Homo sapiens GN=SUB1 PE=1 SV=3	71379000	81222000	115630000	88108000	137820000	77540000	101620000	101030000	123120000	121490000	86804000	94016000	81044000	85384000	103440000	101650000	76992000	51329000	92159000	118220000	116190000	122450000	117070000	112480000
P54105;J3KN38;E9PMI6;E9PJF4;E9PQ83;H0YEN9	Methylosome subunit pICln	CLNS1A	>sp|P54105|ICLN_HUMAN Methylosome subunit pICln OS=Homo sapiens GN=CLNS1A PE=1 SV=1;>tr|J3KN38|J3KN38_HUMAN Methylosome subunit pICln OS=Homo sapiens GN=CLNS1A PE=2 SV=1;>tr|E9PMI6|E9PMI6_HUMAN Methylosome subunit pICln OS=Homo sapiens GN=CLNS1A PE=2 SV=1;	656460000	698220000	891580000	809780000	419600000	405970000	1007700000	1059600000	1034300000	978670000	1045600000	1075400000	566620000	534120000	863930000	895110000	754840000	793780000	844360000	1008200000	1026800000	1146200000	807410000	791030000
P54136;P54136-2;F5H3T8;E5RJM9;E5RH09	Arginine--tRNA ligase, cytoplasmic	RARS	>sp|P54136|SYRC_HUMAN Arginine--tRNA ligase, cytoplasmic OS=Homo sapiens GN=RARS PE=1 SV=2;>sp|P54136-2|SYRC_HUMAN Isoform Monomeric of Arginine--tRNA ligase, cytoplasmic OS=Homo sapiens GN=RARS;>tr|F5H3T8|F5H3T8_HUMAN Arginine--tRNA ligase, cytoplasmic OS	10707000	17062000	14989000	14984000	23558000	20463000	5807400	5702900	8330500	6446100	6754400	6614100	13270000	6419400	7149600	8792200	5483600	6834100	1	1	9283600	7602000	6548500	1
P55060;P55060-3;P55060-4;B4DUC5	Exportin-2	CSE1L	>sp|P55060|XPO2_HUMAN Exportin-2 OS=Homo sapiens GN=CSE1L PE=1 SV=3;>sp|P55060-3|XPO2_HUMAN Isoform 3 of Exportin-2 OS=Homo sapiens GN=CSE1L;>sp|P55060-4|XPO2_HUMAN Isoform 4 of Exportin-2 OS=Homo sapiens GN=CSE1L;>tr|B4DUC5|B4DUC5_HUMAN Exportin-2 OS=Homo	138410000	1	1	1	1	142250000	35329000	41668000	172850000	184980000	82077000	1	1	55638000	39554000	39382000	1	1	26529000	1	154730000	1	39702000	1
P55072;C9IZA5;C9JUP7	Transitional endoplasmic reticulum ATPase	VCP	>sp|P55072|TERA_HUMAN Transitional endoplasmic reticulum ATPase OS=Homo sapiens GN=VCP PE=1 SV=4	22519000	35421000	32332000	29739000	42492000	33882000	15205000	18459000	18652000	20624000	13409000	15002000	11877000	13693000	24033000	20244000	16200000	14900000	14599000	16598000	19751000	17567000	16833000	17922000
P55209;H0YIV4;F5H4R6;F8W0J6;B3KNT8;F8VY35;F8W020;B7Z9C2;F8VV59;F8W118;H0YHC3;F8W543;F8VUX1;F8VXI6;H0YH88;B3KV44;F8VVB5;F8VRJ2;F5HFY4;Q99733;C9JZI7;C9J6D1;E9PKT8;A8MXH2;E9PNJ7;E9PS34;E9PJJ2;E9PNW0	Nucleosome assembly protein 1-like 1	NAP1L1	>sp|P55209|NP1L1_HUMAN Nucleosome assembly protein 1-like 1 OS=Homo sapiens GN=NAP1L1 PE=1 SV=1;>tr|H0YIV4|H0YIV4_HUMAN Nucleosome assembly protein 1-like 1 (Fragment) OS=Homo sapiens GN=NAP1L1 PE=2 SV=1;>tr|F5H4R6|F5H4R6_HUMAN Nucleosome assembly protein	76766000	105040000	89823000	123860000	177930000	167580000	88468000	69190000	72637000	69069000	62383000	69863000	67452000	89643000	86016000	92679000	73257000	60630000	59946000	36424000	84405000	84849000	74135000	65261000
P55259;P55259-3;P55259-2;P55259-4	Pancreatic secretory granule membrane major glycoprotein GP2	GP2	>sp|P55259|GP2_HUMAN Pancreatic secretory granule membrane major glycoprotein GP2 OS=Homo sapiens GN=GP2 PE=2 SV=3;>sp|P55259-3|GP2_HUMAN Isoform Alpha of Pancreatic secretory granule membrane major glycoprotein GP2 OS=Homo sapiens GN=GP2;>sp|P55259-2|GP2_	7357600	6112000	8403800	5881000	11432000	10938000	13315000	11978000	13275000	11780000	10717000	11378000	6917600	4622300	11918000	13150000	10047000	8180100	15354000	15841000	16010000	14699000	10948000	10394000
P55795	Heterogeneous nuclear ribonucleoprotein H2	HNRNPH2	>sp|P55795|HNRH2_HUMAN Heterogeneous nuclear ribonucleoprotein H2 OS=Homo sapiens GN=HNRNPH2 PE=1 SV=1	1	1	4772400	1	2375700	3105400	4111000	4065100	4996400	4055200	2918700	3001000	1	1	1	2785500	1	1	1	1	4392400	4155400	1	3209200
P55884-2;P55884;C9JZG1;C9JQN7	Eukaryotic translation initiation factor 3 subunit B	EIF3B	>sp|P55884-2|EIF3B_HUMAN Isoform 2 of Eukaryotic translation initiation factor 3 subunit B OS=Homo sapiens GN=EIF3B;>sp|P55884|EIF3B_HUMAN Eukaryotic translation initiation factor 3 subunit B OS=Homo sapiens GN=EIF3B PE=1 SV=3	185030000	189990000	262210000	236500000	214370000	193640000	186950000	165430000	163570000	166430000	132510000	128920000	205440000	207240000	194100000	186120000	137360000	133090000	162880000	170700000	169980000	182660000	160190000	164230000
P56537;B7ZBH1;P56537-2;F8WDS6;F8WD20	Eukaryotic translation initiation factor 6	EIF6	>sp|P56537|IF6_HUMAN Eukaryotic translation initiation factor 6 OS=Homo sapiens GN=EIF6 PE=1 SV=1;>tr|B7ZBH1|B7ZBH1_HUMAN Eukaryotic translation initiation factor 6 (Fragment) OS=Homo sapiens GN=EIF6 PE=2 SV=1;>sp|P56537-2|IF6_HUMAN Isoform 2 of Eukaryotic	167110000	191360000	10079000	11934000	4361100	13088000	4161800	4769500	5273600	4719000	12537000	7694200	44930000	70311000	3414200	3811500	21158000	23027000	5059600	5040200	5694400	4803300	5439300	5830600
P57088;D6RAA6	Transmembrane protein 33	TMEM33	>sp|P57088|TMM33_HUMAN Transmembrane protein 33 OS=Homo sapiens GN=TMEM33 PE=1 SV=2;>tr|D6RAA6|D6RAA6_HUMAN Transmembrane protein 33 (Fragment) OS=Homo sapiens GN=TMEM33 PE=2 SV=1	2621800	9257100	1967400	1	1	1	1	1	1	1	1	1	1677500	1	1340600	1542500	1	1	1	1	1	1	1	1
P60174;P60174-1;P60174-4;U3KPZ0;U3KQF3	Triosephosphate isomerase	TPI1	>sp|P60174|TPIS_HUMAN Triosephosphate isomerase OS=Homo sapiens GN=TPI1 PE=1 SV=3;>sp|P60174-1|TPIS_HUMAN Isoform 2 of Triosephosphate isomerase OS=Homo sapiens GN=TPI1;>sp|P60174-4|TPIS_HUMAN Isoform 4 of Triosephosphate isomerase OS=Homo sapiens GN=TPI1	7555900	16600000	28325000	26868000	8851800	9953200	3737500	5434000	32616000	1	4175400	11291000	8580500	10035000	10347000	5245100	1	11920000	53309000	27474000	12432000	3725200	1	26727000
P60228;E5RGA2;H0YBR5;E5RHS5;E5RIT4;H0YAW4;E5RII3;H0YBP5;E5RJ25;E5RIP5	Eukaryotic translation initiation factor 3 subunit E	EIF3E	>sp|P60228|EIF3E_HUMAN Eukaryotic translation initiation factor 3 subunit E OS=Homo sapiens GN=EIF3E PE=1 SV=1;>tr|E5RGA2|E5RGA2_HUMAN Eukaryotic translation initiation factor 3 subunit E OS=Homo sapiens GN=EIF3E PE=2 SV=1;>tr|H0YBR5|H0YBR5_HUMAN Eukaryoti	123450000	72960000	157250000	182100000	133550000	142110000	102300000	87352000	102970000	106710000	79519000	91302000	127880000	103560000	112750000	106760000	82279000	76790000	48087000	48129000	106320000	80569000	79337000	70472000
P60842;P60842-2;J3KT12;J3QS69;J3KTB5;J3QL43;J3KSZ0;Q14240-2;Q14240;E7EQG2;J3QR64;J3KS25;J3QLN6;J3QKZ9;J3KTN0;Q9NZE6;B4E102;J3KSN7;E7EMV8;J3KS93;J3KT04;I3L3H2;F8WE11;E9PBH4;J3QQP0;J3QL52	Eukaryotic initiation factor 4A-I	EIF4A1	>sp|P60842|IF4A1_HUMAN Eukaryotic initiation factor 4A-I OS=Homo sapiens GN=EIF4A1 PE=1 SV=1;>sp|P60842-2|IF4A1_HUMAN Isoform 2 of Eukaryotic initiation factor 4A-I OS=Homo sapiens GN=EIF4A1;>tr|J3KT12|J3KT12_HUMAN Eukaryotic initiation factor 4A-I OS=Homo	137480000	170290000	147230000	130480000	50403000	66476000	57890000	54581000	45391000	44322000	54423000	55011000	84058000	122200000	39942000	47966000	37874000	33321000	31562000	33028000	67914000	64811000	33788000	32407000
P60866-2;P60866;E5RJX2;E5RIP1;G3XAN0	40S ribosomal protein S20	RPS20	>sp|P60866-2|RS20_HUMAN Isoform 2 of 40S ribosomal protein S20 OS=Homo sapiens GN=RPS20;>sp|P60866|RS20_HUMAN 40S ribosomal protein S20 OS=Homo sapiens GN=RPS20 PE=1 SV=1;>tr|E5RJX2|E5RJX2_HUMAN 40S ribosomal protein S20 OS=Homo sapiens GN=RPS20 PE=2 SV=1;	1349900000	1396800000	104820000	93428000	136250000	130280000	104680000	103510000	100910000	114460000	155540000	154620000	623600000	627720000	131740000	150320000	218460000	237010000	114110000	111940000	108880000	127690000	75883000	99041000
P60891;P21108;B4DNL6;B1ALA9;B1ALA7	Ribose-phosphate pyrophosphokinase 1;Ribose-phosphate pyrophosphokinase 3;Ribose-phosphate pyrophosphokinase	PRPS1;PRPS1L1	>sp|P60891|PRPS1_HUMAN Ribose-phosphate pyrophosphokinase 1 OS=Homo sapiens GN=PRPS1 PE=1 SV=2;>sp|P21108|PRPS3_HUMAN Ribose-phosphate pyrophosphokinase 3 OS=Homo sapiens GN=PRPS1L1 PE=1 SV=2;>tr|B4DNL6|B4DNL6_HUMAN Ribose-phosphate pyrophosphokinase 1 OS=	45562000	20646000	58149000	58643000	18745000	22538000	25820000	24080000	20747000	4740600	27033000	32837000	28770000	24839000	1983800	19240000	19825000	22716000	31452000	34236000	39178000	20359000	1	20791000
P60981;P60981-2;F6RFD5	Destrin	DSTN	>sp|P60981|DEST_HUMAN Destrin OS=Homo sapiens GN=DSTN PE=1 SV=3;>sp|P60981-2|DEST_HUMAN Isoform 2 of Destrin OS=Homo sapiens GN=DSTN;>tr|F6RFD5|F6RFD5_HUMAN Destrin OS=Homo sapiens GN=DSTN PE=2 SV=1	16616000	11931000	8471100	9030600	4805400	5999600	4898000	1	6240600	6326000	2994800	1	1	4551000	2425500	1884200	3579400	1	9811400	8338700	1	5393100	4223200	4581700
P61026	Ras-related protein Rab-10	RAB10	>sp|P61026|RAB10_HUMAN Ras-related protein Rab-10 OS=Homo sapiens GN=RAB10 PE=1 SV=1	20280000	11588000	7121600	8026200	4782000	6645700	4020700	3960200	3614100	3578300	2938300	2961500	6008400	4689200	1	3804000	1	1	1	4087300	4660700	4453400	1	3534600
P61158;B4DXW1	Actin-related protein 3	ACTR3	>sp|P61158|ARP3_HUMAN Actin-related protein 3 OS=Homo sapiens GN=ACTR3 PE=1 SV=3;>tr|B4DXW1|B4DXW1_HUMAN Actin-related protein 3 OS=Homo sapiens GN=ACTR3 PE=2 SV=1	1	1	1	1	1	1	1	1	1	1	1	1	1	1	1	1	1	1	1	1	1	1	1	1
P61163;R4GMT0;B4DXP9;F5H3I4;P42025	Alpha-centractin	ACTR1A	>sp|P61163|ACTZ_HUMAN Alpha-centractin OS=Homo sapiens GN=ACTR1A PE=1 SV=1;>tr|R4GMT0|R4GMT0_HUMAN Alpha-centractin OS=Homo sapiens GN=ACTR1A PE=3 SV=1;>tr|B4DXP9|B4DXP9_HUMAN Alpha-centractin OS=Homo sapiens GN=ACTR1A PE=2 SV=1;>tr|F5H3I4|F5H3I4_HUMAN Alp	15132000	29139000	44667000	55654000	65503000	55984000	53924000	54823000	55056000	43015000	57222000	48795000	48018000	33515000	39866000	37268000	37552000	38928000	47804000	51922000	51572000	61683000	50842000	48596000
P61204;P84077;B7ZB63;F5H423;P84085;C9J1Z8;H0YGG7	ADP-ribosylation factor 3;ADP-ribosylation factor 1;ADP-ribosylation factor 5	ARF3;ARF1;ARF5	>sp|P61204|ARF3_HUMAN ADP-ribosylation factor 3 OS=Homo sapiens GN=ARF3 PE=1 SV=2;>sp|P84077|ARF1_HUMAN ADP-ribosylation factor 1 OS=Homo sapiens GN=ARF1 PE=1 SV=2;>tr|B7ZB63|B7ZB63_HUMAN ADP-ribosylation factor 3 OS=Homo sapiens GN=ARF3 PE=2 SV=1;>tr|F5H4	9479900	17031000	16741000	14199000	1	1	1	1	1	1	1	1	1	3142800	1420100	1	1	1	1	1	1	1	1	1
P61221;D6R9I9;D6RGF4;H0Y990	ATP-binding cassette sub-family E member 1	ABCE1	>sp|P61221|ABCE1_HUMAN ATP-binding cassette sub-family E member 1 OS=Homo sapiens GN=ABCE1 PE=1 SV=1;>tr|D6R9I9|D6R9I9_HUMAN ATP-binding cassette sub-family E member 1 OS=Homo sapiens GN=ABCE1 PE=2 SV=1;>tr|D6RGF4|D6RGF4_HUMAN ATP-binding cassette sub-fami	4075400	6886400	2214700	1	1	1	1	1	1	1	1	1	2639600	2537900	1	1	1	1	1	1	1	1	1	1
P61224;F5H7Y6;P61224-3;E7ESV4;P61224-4;F5GX62;F5H004;F5H6R7;A6NIZ1;P62834;P61224-2;F5GYB5;F5GZG1;B7ZB78;F5H823;F5H500;F5H0B7;F5H491;F5GWU8;F5H077;F5GYH7;F5H4H0;F8WBC0	Ras-related protein Rap-1b;Ras-related protein Rap-1b-like protein;Ras-related protein Rap-1A	RAP1B;RAP1A	>sp|P61224|RAP1B_HUMAN Ras-related protein Rap-1b OS=Homo sapiens GN=RAP1B PE=1 SV=1;>tr|F5H7Y6|F5H7Y6_HUMAN Ras-related protein Rap-1b OS=Homo sapiens GN=RAP1B PE=2 SV=1;>sp|P61224-3|RAP1B_HUMAN Isoform 3 of Ras-related protein Rap-1b OS=Homo sapiens GN=R	265830	152690	1	171340	1	1	653070	699740	1	1	1	1	209370	167700	38792000	33893000	1557000	1496700	1	1	1	1	1	1
P61247;H0Y9Y4;D6RG13;D6RAT0;E9PFI5;F5H4F9;D6RB09;H0Y8L7;D6R9B6;D6RI02;D6RAS7;D6RED7;D6RGE0	40S ribosomal protein S3a	RPS3A	>sp|P61247|RS3A_HUMAN 40S ribosomal protein S3a OS=Homo sapiens GN=RPS3A PE=1 SV=2;>tr|H0Y9Y4|H0Y9Y4_HUMAN 40S ribosomal protein S3a (Fragment) OS=Homo sapiens GN=RPS3A PE=2 SV=1;>tr|D6RG13|D6RG13_HUMAN 40S ribosomal protein S3a (Fragment) OS=Homo sapiens	1600400000	1728500000	393220000	415000000	641230000	717240000	423090000	453050000	419510000	433380000	543940000	522390000	1519000000	1300000000	511210000	541230000	668600000	698460000	424650000	451230000	519710000	448530000	337460000	320050000
P61254;J3QQV1;J3QQQ9;J3QRI7;J3QRC4;J3KTJ8;J3KSS0;J3KS10;Q2PPJ7;Q2PPJ7-2;Q2PPJ7-3;H7C1F9	60S ribosomal protein L26	RPL26	>sp|P61254|RL26_HUMAN 60S ribosomal protein L26 OS=Homo sapiens GN=RPL26 PE=1 SV=1;>tr|J3QQV1|J3QQV1_HUMAN 60S ribosomal protein L26 OS=Homo sapiens GN=RPL26 PE=2 SV=1;>tr|J3QQQ9|J3QQQ9_HUMAN KRAB-A domain-containing protein 2 OS=Homo sapiens GN=KRBA2 PE=2	837570000	766240000	97217000	104770000	160610000	184090000	110130000	106170000	136450000	141640000	141510000	159730000	603720000	722820000	175240000	162690000	267700000	267330000	112080000	117330000	159680000	179430000	95830000	99855000
P61313;E7EQV9;E7ENU7;E7EX53;P61313-2;E7ERA2	60S ribosomal protein L15;Ribosomal protein L15	RPL15	>sp|P61313|RL15_HUMAN 60S ribosomal protein L15 OS=Homo sapiens GN=RPL15 PE=1 SV=2;>tr|E7EQV9|E7EQV9_HUMAN Ribosomal protein L15 (Fragment) OS=Homo sapiens GN=RPL15 PE=2 SV=1;>tr|E7ENU7|E7ENU7_HUMAN Ribosomal protein L15 (Fragment) OS=Homo sapiens GN=RPL15	1165200000	773910000	120140000	139020000	168630000	226610000	152780000	128420000	137170000	157800000	176430000	192710000	606140000	601760000	177580000	174630000	356630000	314010000	156170000	153040000	176210000	182460000	106370000	107440000
P61353;K7ELC7;K7EQQ9;K7ERY7	60S ribosomal protein L27	RPL27	>sp|P61353|RL27_HUMAN 60S ribosomal protein L27 OS=Homo sapiens GN=RPL27 PE=1 SV=2;>tr|K7ELC7|K7ELC7_HUMAN 60S ribosomal protein L27 (Fragment) OS=Homo sapiens GN=RPL27 PE=3 SV=1;>tr|K7EQQ9|K7EQQ9_HUMAN 60S ribosomal protein L27 OS=Homo sapiens GN=RPL27 PE	1708400000	1997700000	170330000	142970000	244900000	226030000	148340000	126840000	186340000	138030000	209470000	166110000	750610000	754820000	181180000	159780000	255480000	284250000	206970000	234800000	194210000	168490000	128250000	112080000
P61513;E9PEL3;Q6P4E4;C9J4Z3;G5E9R3;M0R2L6;M0R0A1;A6NKH3	60S ribosomal protein L37a	RPL37A	>sp|P61513|RL37A_HUMAN 60S ribosomal protein L37a OS=Homo sapiens GN=RPL37A PE=1 SV=2;>tr|E9PEL3|E9PEL3_HUMAN 60S ribosomal protein L37a OS=Homo sapiens GN=RPL37A PE=2 SV=1;>tr|Q6P4E4|Q6P4E4_HUMAN 60S ribosomal protein L37a OS=Homo sapiens GN=RPL37A PE=2 S	78864000	70555000	12281000	14227000	23710000	15008000	16387000	14172000	19396000	26204000	20865000	23681000	90746000	86991000	23056000	22101000	47324000	44445000	14034000	17210000	18333000	19372000	19708000	20499000
P61604;S4R3N1;B8ZZL8;B8ZZ54	10 kDa heat shock protein, mitochondrial	HSPE1	>sp|P61604|CH10_HUMAN 10 kDa heat shock protein, mitochondrial OS=Homo sapiens GN=HSPE1 PE=1 SV=2;>tr|S4R3N1|S4R3N1_HUMAN MOB-like protein phocein OS=Homo sapiens GN=MOB4 PE=3 SV=1;>tr|B8ZZL8|B8ZZL8_HUMAN 10 kDa heat shock protein, mitochondrial OS=Homo sa	63737000	83421000	50444000	51889000	30758000	24585000	2720900	6084200	1	2730100	1	1	21757000	24268000	5038500	3474800	3664500	3724100	5243700	1	1	4569800	1	1
P61626;F8VV32	Lysozyme C	LYZ	>sp|P61626|LYSC_HUMAN Lysozyme C OS=Homo sapiens GN=LYZ PE=1 SV=1;>tr|F8VV32|F8VV32_HUMAN Lysozyme C OS=Homo sapiens GN=LYZ PE=2 SV=1	1	5162000	4723800	5159600	1	3860600	6364200	8691300	1	1	1	1	3952300	4522800	7300700	10047000	1	1	1	1	7990300	6115600	1	1
P61978-2;P61978;Q5T6W1;S4R359;S4R457	Heterogeneous nuclear ribonucleoprotein K	HNRNPK	>sp|P61978-2|HNRPK_HUMAN Isoform 2 of Heterogeneous nuclear ribonucleoprotein K OS=Homo sapiens GN=HNRNPK;>sp|P61978|HNRPK_HUMAN Heterogeneous nuclear ribonucleoprotein K OS=Homo sapiens GN=HNRNPK PE=1 SV=1	471910000	389610000	1090900000	1083400000	689980000	714840000	802430000	793580000	758660000	868490000	741170000	786510000	677250000	715630000	806100000	794890000	661280000	734500000	653980000	754690000	475110000	556260000	653690000	640000000
P61981	14-3-3 protein gamma;14-3-3 protein gamma, N-terminally processed	YWHAG	>sp|P61981|1433G_HUMAN 14-3-3 protein gamma OS=Homo sapiens GN=YWHAG PE=1 SV=2	10925000	9343800	3353400	4158800	1	3478100	1	1	1	1	1	1	7282100	6336300	10014000	4416300	1	1	1	1	1	1	1	1
P62081;B5MCP9	40S ribosomal protein S7	RPS7	>sp|P62081|RS7_HUMAN 40S ribosomal protein S7 OS=Homo sapiens GN=RPS7 PE=1 SV=1;>tr|B5MCP9|B5MCP9_HUMAN 40S ribosomal protein S7 OS=Homo sapiens GN=RPS7 PE=2 SV=1	2230100000	2217900000	228380000	227880000	255970000	270090000	241010000	221830000	198360000	224160000	500290000	496830000	931610000	903890000	299170000	284770000	536550000	520380000	347240000	353940000	279580000	260370000	186600000	175010000
P62191;B4DR63;G3V4X1	26S protease regulatory subunit 4	PSMC1	>sp|P62191|PRS4_HUMAN 26S protease regulatory subunit 4 OS=Homo sapiens GN=PSMC1 PE=1 SV=1;>tr|B4DR63|B4DR63_HUMAN 26S protease regulatory subunit 4 OS=Homo sapiens GN=PSMC1 PE=2 SV=1	23022000	22213000	43266000	40631000	60929000	68046000	33260000	31148000	30933000	33467000	36380000	36449000	43444000	32884000	51744000	49206000	37887000	35314000	50729000	23693000	55304000	44286000	29054000	19500000
P62195;P62195-2;J3QQM1;J3QSA9;J3KRP2;J3QLH6;J3QSE0;J3QRW1;J3QRR3;Q8NB90;Q8NB90-2;Q8NB90-3	26S protease regulatory subunit 8	PSMC5	>sp|P62195|PRS8_HUMAN 26S protease regulatory subunit 8 OS=Homo sapiens GN=PSMC5 PE=1 SV=1;>sp|P62195-2|PRS8_HUMAN Isoform 2 of 26S protease regulatory subunit 8 OS=Homo sapiens GN=PSMC5;>tr|J3QQM1|J3QQM1_HUMAN 26S protease regulatory subunit 8 (Fragment)	22730000	39812000	45493000	44426000	84907000	74652000	76698000	37263000	42530000	29593000	31818000	22936000	37784000	34172000	93722000	39714000	34384000	51134000	16441000	15870000	24896000	27051000	22237000	24122000
P62241;Q5JR95	40S ribosomal protein S8	RPS8	>sp|P62241|RS8_HUMAN 40S ribosomal protein S8 OS=Homo sapiens GN=RPS8 PE=1 SV=2;>tr|Q5JR95|Q5JR95_HUMAN 40S ribosomal protein S8 OS=Homo sapiens GN=RPS8 PE=2 SV=1	2369300000	2402300000	202290000	210320000	366390000	361430000	261290000	274700000	246420000	261210000	346330000	344650000	976700000	1012500000	282460000	300080000	466170000	468650000	201710000	219030000	258660000	272170000	168560000	175010000
P62244;I3L3P7;H3BN98;I3L246;H3BVC7;I3L303;H3BT37;H3BV27	40S ribosomal protein S15a	RPS15A	>sp|P62244|RS15A_HUMAN 40S ribosomal protein S15a OS=Homo sapiens GN=RPS15A PE=1 SV=2;>tr|I3L3P7|I3L3P7_HUMAN 40S ribosomal protein S15a OS=Homo sapiens GN=RPS15A PE=2 SV=1;>tr|H3BN98|H3BN98_HUMAN Uncharacterized protein (Fragment) OS=Homo sapiens PE=4 SV=	1209800000	1236300000	171150000	174550000	217520000	222000000	114510000	107590000	114020000	105790000	146770000	135560000	613720000	525490000	159780000	155660000	259850000	238690000	112910000	141240000	87315000	72663000	72433000	90487000
P62249;M0R210;M0R3H0;M0R1M5;Q6IPX4;M0QX76	40S ribosomal protein S16	RPS16	>sp|P62249|RS16_HUMAN 40S ribosomal protein S16 OS=Homo sapiens GN=RPS16 PE=1 SV=2;>tr|M0R210|M0R210_HUMAN 40S ribosomal protein S16 OS=Homo sapiens GN=RPS16 PE=2 SV=1;>tr|M0R3H0|M0R3H0_HUMAN 40S ribosomal protein S16 OS=Homo sapiens GN=RPS16 PE=2 SV=1;>tr	4262300000	4218000000	434730000	491170000	705460000	725990000	413560000	342190000	325470000	312620000	610690000	600990000	2436000000	2177200000	527330000	541460000	860400000	804010000	458860000	417180000	530690000	480180000	323820000	315520000
P62258;P62258-2;I3L3T1;B4DJF2;K7EM20;K7EIT4;I3L0W5	14-3-3 protein epsilon	YWHAE	>sp|P62258|1433E_HUMAN 14-3-3 protein epsilon OS=Homo sapiens GN=YWHAE PE=1 SV=1;>sp|P62258-2|1433E_HUMAN Isoform SV of 14-3-3 protein epsilon OS=Homo sapiens GN=YWHAE;>tr|I3L3T1|I3L3T1_HUMAN 14-3-3 protein epsilon OS=Homo sapiens GN=YWHAE PE=2 SV=1;>tr|B4	69876000	60633000	107800000	105550000	83083000	107940000	77256000	66202000	94710000	69154000	113360000	70836000	84163000	71298000	64101000	109950000	106600000	91365000	95744000	100040000	107440000	111020000	64049000	69633000
P62263;E5RH77;H0YB22	40S ribosomal protein S14	RPS14	>sp|P62263|RS14_HUMAN 40S ribosomal protein S14 OS=Homo sapiens GN=RPS14 PE=1 SV=3;>tr|E5RH77|E5RH77_HUMAN 40S ribosomal protein S14 OS=Homo sapiens GN=RPS14 PE=2 SV=1;>tr|H0YB22|H0YB22_HUMAN 40S ribosomal protein S14 (Fragment) OS=Homo sapiens GN=RPS14 PE	692660000	674050000	93333000	86250000	157730000	157660000	95444000	103050000	101120000	105810000	111910000	109640000	434630000	436610000	130830000	143430000	157530000	152990000	92026000	88146000	119160000	126020000	88660000	85347000
P62266;D6RD47;D6R9I7;D6RIX0;D6RDJ2	40S ribosomal protein S23	RPS23	>sp|P62266|RS23_HUMAN 40S ribosomal protein S23 OS=Homo sapiens GN=RPS23 PE=1 SV=3;>tr|D6RD47|D6RD47_HUMAN 40S ribosomal protein S23 OS=Homo sapiens GN=RPS23 PE=2 SV=1;>tr|D6R9I7|D6R9I7_HUMAN 40S ribosomal protein S23 OS=Homo sapiens GN=RPS23 PE=2 SV=1;>tr	606070000	515550000	48582000	45747000	102060000	112850000	51470000	53147000	66328000	54227000	84151000	86466000	381570000	329260000	87695000	84430000	136810000	116620000	62857000	62803000	67064000	82293000	55637000	53400000
P62269;J3JS69	40S ribosomal protein S18	RPS18	>sp|P62269|RS18_HUMAN 40S ribosomal protein S18 OS=Homo sapiens GN=RPS18 PE=1 SV=3	2036100000	1406800000	146040000	161880000	224300000	254260000	161100000	171000000	125660000	122390000	269370000	258270000	1019900000	1035700000	238210000	195200000	292380000	358700000	131520000	126550000	174810000	156900000	114610000	108260000
P62273;P62273-2	40S ribosomal protein S29	RPS29	>sp|P62273|RS29_HUMAN 40S ribosomal protein S29 OS=Homo sapiens GN=RPS29 PE=1 SV=2;>sp|P62273-2|RS29_HUMAN Isoform 2 of 40S ribosomal protein S29 OS=Homo sapiens GN=RPS29	241230000	123940000	21816000	18739000	29780000	41267000	21504000	16355000	22870000	24941000	38979000	39862000	190480000	180540000	23657000	26177000	83189000	83272000	22050000	38729000	20800000	24774000	18229000	16782000
P62277;J3KMX5;E9PS50	40S ribosomal protein S13	RPS13	>sp|P62277|RS13_HUMAN 40S ribosomal protein S13 OS=Homo sapiens GN=RPS13 PE=1 SV=2;>tr|J3KMX5|J3KMX5_HUMAN 40S ribosomal protein S13 OS=Homo sapiens GN=RPS13 PE=2 SV=1	1655700000	1553100000	149200000	152150000	244910000	278180000	130340000	123270000	121580000	133600000	352890000	338850000	707380000	728930000	172100000	168700000	416110000	385190000	259570000	366840000	145770000	137850000	95846000	103020000
P62280;M0QZC5;M0R1H6;M0R1H5	40S ribosomal protein S11	RPS11	>sp|P62280|RS11_HUMAN 40S ribosomal protein S11 OS=Homo sapiens GN=RPS11 PE=1 SV=3;>tr|M0QZC5|M0QZC5_HUMAN 40S ribosomal protein S11 OS=Homo sapiens GN=RPS11 PE=2 SV=1	1346000000	1375500000	163040000	189120000	324490000	294330000	201160000	195930000	197150000	208250000	233270000	256520000	745940000	742990000	276510000	254170000	328180000	345570000	178520000	192980000	229690000	220430000	165370000	166300000
P62304;A6NHK2	Small nuclear ribonucleoprotein E	SNRPE	>sp|P62304|RUXE_HUMAN Small nuclear ribonucleoprotein E OS=Homo sapiens GN=SNRPE PE=1 SV=1;>tr|A6NHK2|A6NHK2_HUMAN Small nuclear ribonucleoprotein E OS=Homo sapiens GN=SNRPE PE=2 SV=1	49558000	32492000	5466000	6002100	1	19987000	45729000	51764000	96151000	35368000	59049000	57522000	51311000	47766000	77573000	42295000	28661000	30803000	32643000	32613000	47731000	37000000	38400000	33681000
P62306;F8W0W6	Small nuclear ribonucleoprotein F	SNRPF	>sp|P62306|RUXF_HUMAN Small nuclear ribonucleoprotein F OS=Homo sapiens GN=SNRPF PE=1 SV=1;>tr|F8W0W6|F8W0W6_HUMAN Small nuclear ribonucleoprotein F OS=Homo sapiens GN=SNRPF PE=2 SV=1	14577000	12124000	24088000	29265000	11254000	17052000	19851000	33963000	23674000	16174000	48516000	32608000	26115000	19653000	18433000	27577000	17252000	16845000	23788000	32958000	18401000	24137000	23053000	19799000
P62314;J3QLI9;J3QLR7	Small nuclear ribonucleoprotein Sm D1	SNRPD1	>sp|P62314|SMD1_HUMAN Small nuclear ribonucleoprotein Sm D1 OS=Homo sapiens GN=SNRPD1 PE=1 SV=1;>tr|J3QLI9|J3QLI9_HUMAN Small nuclear ribonucleoprotein Sm D1 OS=Homo sapiens GN=SNRPD1 PE=2 SV=1	636810000	702340000	664140000	678120000	388910000	357230000	610180000	648160000	695750000	637860000	599390000	488480000	407800000	450800000	576970000	574260000	484140000	434840000	738820000	744160000	753540000	674570000	529130000	480690000
P62316;P62316-2;K7ERG4;K7EJB5	Small nuclear ribonucleoprotein Sm D2	SNRPD2	>sp|P62316|SMD2_HUMAN Small nuclear ribonucleoprotein Sm D2 OS=Homo sapiens GN=SNRPD2 PE=1 SV=1;>sp|P62316-2|SMD2_HUMAN Isoform 2 of Small nuclear ribonucleoprotein Sm D2 OS=Homo sapiens GN=SNRPD2;>tr|K7ERG4|K7ERG4_HUMAN Small nuclear ribonucleoprotein Sm	331930000	296400000	448710000	485090000	196530000	209070000	593280000	618260000	638060000	709450000	549420000	576070000	413800000	434780000	489270000	455420000	460620000	442460000	650990000	724960000	665850000	686070000	531750000	591810000
P62318;B4DJP7;H3BT13	Small nuclear ribonucleoprotein Sm D3	SNRPD3	>sp|P62318|SMD3_HUMAN Small nuclear ribonucleoprotein Sm D3 OS=Homo sapiens GN=SNRPD3 PE=1 SV=1;>tr|B4DJP7|B4DJP7_HUMAN Small nuclear ribonucleoprotein Sm D3 OS=Homo sapiens GN=SNRPD3 PE=2 SV=1;>tr|H3BT13|H3BT13_HUMAN Small nuclear ribonucleoprotein Sm D3	538430000	509470000	454270000	547320000	184010000	177840000	804120000	648500000	682160000	512810000	673010000	628080000	582150000	475460000	644170000	540510000	420770000	480880000	479700000	473210000	722230000	604130000	490330000	442980000
P62333;H0YJC0;H0YJT1;H0YJE9	26S protease regulatory subunit 10B	PSMC6	>sp|P62333|PRS10_HUMAN 26S protease regulatory subunit 10B OS=Homo sapiens GN=PSMC6 PE=1 SV=1	31977000	24781000	29826000	30688000	50143000	44676000	25116000	16968000	31424000	21623000	19255000	12593000	33623000	29991000	31430000	27126000	18681000	11867000	29399000	15912000	29964000	23525000	28626000	16528000
P62424;Q5T8U2;Q5T8U3	60S ribosomal protein L7a	RPL7A	>sp|P62424|RL7A_HUMAN 60S ribosomal protein L7a OS=Homo sapiens GN=RPL7A PE=1 SV=2;>tr|Q5T8U2|Q5T8U2_HUMAN 60S ribosomal protein L7a OS=Homo sapiens GN=RPL7A PE=2 SV=1;>tr|Q5T8U3|Q5T8U3_HUMAN 60S ribosomal protein L7a (Fragment) OS=Homo sapiens GN=RPL7A PE	2491800000	1942800000	223530000	231940000	301530000	308010000	239490000	244950000	261380000	284420000	337850000	331090000	1158400000	1173700000	308970000	308910000	503740000	536990000	301660000	285580000	334840000	301360000	200280000	204830000
P62701;A6NH36;Q8TD47	40S ribosomal protein S4, X isoform	RPS4X	>sp|P62701|RS4X_HUMAN 40S ribosomal protein S4, X isoform OS=Homo sapiens GN=RPS4X PE=1 SV=2	2534400000	2881800000	330260000	355580000	572710000	611530000	338960000	360910000	316360000	410280000	399900000	432260000	1614500000	1548100000	447690000	442270000	807030000	722830000	346060000	402360000	336520000	374300000	299040000	314320000
P62750;A8MUS3;K7ERT8;H7BY10;K7EJV9;K7EMA7	60S ribosomal protein L23a	RPL23A	>sp|P62750|RL23A_HUMAN 60S ribosomal protein L23a OS=Homo sapiens GN=RPL23A PE=1 SV=1;>tr|A8MUS3|A8MUS3_HUMAN 60S ribosomal protein L23a OS=Homo sapiens GN=RPL23A PE=2 SV=1;>tr|K7ERT8|K7ERT8_HUMAN 60S ribosomal protein L23a (Fragment) OS=Homo sapiens GN=RP	1831000000	1593500000	87921000	90526000	184400000	146980000	104100000	95419000	111260000	99523000	127910000	124830000	657740000	647260000	136590000	140440000	207440000	225000000	85429000	105420000	113370000	121650000	87674000	79039000
P62753;A2A3R5;A2A3R7	40S ribosomal protein S6	RPS6	>sp|P62753|RS6_HUMAN 40S ribosomal protein S6 OS=Homo sapiens GN=RPS6 PE=1 SV=1;>tr|A2A3R5|A2A3R5_HUMAN 40S ribosomal protein S6 OS=Homo sapiens GN=RPS6 PE=2 SV=1	1370100000	1266400000	86814000	87719000	174520000	173760000	116590000	105390000	137890000	129160000	136550000	143800000	534230000	524130000	133400000	120390000	196820000	188110000	127320000	130870000	141620000	91217000	112400000	144180000
P62805	Histone H4	HIST1H4A	>sp|P62805|H4_HUMAN Histone H4 OS=Homo sapiens GN=HIST1H4A PE=1 SV=2	36593000	45875000	34044000	34858000	115640000	98990000	20519000	20412000	122310000	149440000	55799000	68375000	67217000	71104000	31476000	28992000	48022000	62267000	19078000	15222000	102040000	107080000	26939000	25127000
P62829;J3KT29;C9JD32;B9ZVP7;J3KTJ3;J3QQT9	60S ribosomal protein L23	RPL23	>sp|P62829|RL23_HUMAN 60S ribosomal protein L23 OS=Homo sapiens GN=RPL23 PE=1 SV=1;>tr|J3KT29|J3KT29_HUMAN 60S ribosomal protein L23 OS=Homo sapiens GN=RPL23 PE=2 SV=1;>tr|C9JD32|C9JD32_HUMAN 60S ribosomal protein L23 (Fragment) OS=Homo sapiens GN=RPL23 PE	431250000	441960000	105400000	117270000	231510000	203650000	146360000	163110000	158620000	160610000	162570000	162080000	323990000	323910000	163790000	166550000	238530000	250810000	141020000	184530000	129630000	132060000	134110000	140310000
P62847-4;P62847;P62847-3;E7ETK0;P62847-2	40S ribosomal protein S24	RPS24	>sp|P62847-4|RS24_HUMAN Isoform 4 of 40S ribosomal protein S24 OS=Homo sapiens GN=RPS24;>sp|P62847|RS24_HUMAN 40S ribosomal protein S24 OS=Homo sapiens GN=RPS24 PE=1 SV=1;>sp|P62847-3|RS24_HUMAN Isoform 3 of 40S ribosomal protein S24 OS=Homo sapiens GN=RPS	210030000	236230000	101630000	125450000	146670000	131160000	118220000	82883000	97671000	131400000	129500000	124380000	190580000	193180000	146980000	146720000	121460000	137500000	146380000	82430000	133620000	127870000	113400000	140760000
P62851;E9PK60;E9PQK3	40S ribosomal protein S25	RPS25	>sp|P62851|RS25_HUMAN 40S ribosomal protein S25 OS=Homo sapiens GN=RPS25 PE=1 SV=1	1527400000	1599300000	98928000	106900000	168860000	156730000	108670000	104510000	70090000	83616000	142210000	145170000	535440000	542250000	123950000	149470000	251400000	211630000	105640000	138130000	123000000	107390000	58347000	60738000
P62854;Q5JNZ5	40S ribosomal protein S26;Putative 40S ribosomal protein S26-like 1	RPS26;RPS26P11	>sp|P62854|RS26_HUMAN 40S ribosomal protein S26 OS=Homo sapiens GN=RPS26 PE=1 SV=3;>sp|Q5JNZ5|RS26L_HUMAN Putative 40S ribosomal protein S26-like 1 OS=Homo sapiens GN=RPS26P11 PE=5 SV=1	387130000	606520000	14568000	153720000	170180000	236960000	68155000	31613000	128530000	67051000	95441000	61679000	221760000	383000000	42295000	63608000	130240000	121750000	67954000	53762000	50567000	49402000	38523000	42152000
P62857	40S ribosomal protein S28	RPS28	>sp|P62857|RS28_HUMAN 40S ribosomal protein S28 OS=Homo sapiens GN=RPS28 PE=1 SV=1	64752000	354180000	81294000	23510000	98878000	96319000	71506000	77251000	88053000	88157000	120380000	125320000	162260000	208240000	85210000	87703000	116240000	120300000	91393000	90892000	90602000	75073000	62041000	58980000
P62888;E5RI99;E5RJH3	60S ribosomal protein L30	RPL30	>sp|P62888|RL30_HUMAN 60S ribosomal protein L30 OS=Homo sapiens GN=RPL30 PE=1 SV=2;>tr|E5RI99|E5RI99_HUMAN 60S ribosomal protein L30 (Fragment) OS=Homo sapiens GN=RPL30 PE=2 SV=1;>tr|E5RJH3|E5RJH3_HUMAN 60S ribosomal protein L30 OS=Homo sapiens GN=RPL30 PE	641420000	657620000	129460000	97716000	161290000	149480000	123950000	80785000	90539000	107160000	100980000	112620000	250730000	192780000	133000000	119870000	184890000	114040000	163250000	152840000	134670000	116580000	76494000	65783000
P62891;Q59GN2	60S ribosomal protein L39;Putative 60S ribosomal protein L39-like 5	RPL39;RPL39P5	>sp|P62891|RL39_HUMAN 60S ribosomal protein L39 OS=Homo sapiens GN=RPL39 PE=1 SV=2;>sp|Q59GN2|R39L5_HUMAN Putative 60S ribosomal protein L39-like 5 OS=Homo sapiens GN=RPL39P5 PE=5 SV=2	10406000	76560000	41394000	1	1	127280000	228280000	1	1	1	77325000	1	1	1	1	1	1	1	57480000	65896000	1	1	45512000	1
P62899;B7Z4C8;P62899-2;P62899-3;B7Z4E3;C9JU56;H7C2W9;B8ZZK4	60S ribosomal protein L31	RPL31	>sp|P62899|RL31_HUMAN 60S ribosomal protein L31 OS=Homo sapiens GN=RPL31 PE=1 SV=1;>tr|B7Z4C8|B7Z4C8_HUMAN 60S ribosomal protein L31 OS=Homo sapiens GN=RPL31 PE=2 SV=1;>sp|P62899-2|RL31_HUMAN Isoform 2 of 60S ribosomal protein L31 OS=Homo sapiens GN=RPL31;	570790000	521580000	61534000	58833000	107950000	108920000	70233000	74266000	73527000	78027000	84100000	95129000	423220000	345310000	104400000	93917000	141400000	134580000	82539000	78766000	110430000	101250000	66720000	66520000
P62906	60S ribosomal protein L10a	RPL10A	>sp|P62906|RL10A_HUMAN 60S ribosomal protein L10a OS=Homo sapiens GN=RPL10A PE=1 SV=2	751630000	786870000	209720000	204390000	350680000	330200000	238360000	267910000	212990000	219560000	327610000	285460000	345390000	393030000	235350000	243850000	284680000	293440000	183680000	187930000	250620000	257510000	177850000	188520000
P62913;P62913-2;Q5VVC8;Q5VVC9	60S ribosomal protein L11	RPL11	>sp|P62913|RL11_HUMAN 60S ribosomal protein L11 OS=Homo sapiens GN=RPL11 PE=1 SV=2;>sp|P62913-2|RL11_HUMAN Isoform 2 of 60S ribosomal protein L11 OS=Homo sapiens GN=RPL11;>tr|Q5VVC8|Q5VVC8_HUMAN 60S ribosomal protein L11 (Fragment) OS=Homo sapiens GN=RPL11	1410000000	1407200000	142540000	147130000	215890000	218930000	185820000	210480000	188600000	164550000	268130000	253950000	469310000	485450000	214920000	227300000	321690000	266470000	186940000	184540000	220220000	277900000	179420000	153340000
P62917;E9PKU4;E9PKZ0;G3V1A1;E9PP36	60S ribosomal protein L8	RPL8	>sp|P62917|RL8_HUMAN 60S ribosomal protein L8 OS=Homo sapiens GN=RPL8 PE=1 SV=2;>tr|E9PKU4|E9PKU4_HUMAN 60S ribosomal protein L8 (Fragment) OS=Homo sapiens GN=RPL8 PE=2 SV=1;>tr|E9PKZ0|E9PKZ0_HUMAN 60S ribosomal protein L8 (Fragment) OS=Homo sapiens GN=RPL	868910000	921390000	80780000	91031000	134480000	150060000	113020000	101960000	119830000	154680000	132430000	135040000	604560000	647190000	135730000	130520000	256710000	245660000	97682000	111560000	147410000	134010000	85189000	95750000
P62937;C9J5S7;F8WE65;Q567Q0;F5H284;Q9Y536;P49792;Q08752;P30405;O43447;H0Y548;A2BFH1;Q2YDB7;R4GN99;C9JQD4;E5RIZ5;A6NM32	Peptidyl-prolyl cis-trans isomerase A;Peptidyl-prolyl cis-trans isomerase	PPIA	>sp|P62937|PPIA_HUMAN Peptidyl-prolyl cis-trans isomerase A OS=Homo sapiens GN=PPIA PE=1 SV=2;>tr|C9J5S7|C9J5S7_HUMAN Peptidyl-prolyl cis-trans isomerase OS=Homo sapiens GN=PPIA PE=2 SV=1;>tr|F8WE65|F8WE65_HUMAN Peptidyl-prolyl cis-trans isomerase OS=Homo	385470000	411250000	222430000	182560000	138690000	91351000	51036000	35733000	42816000	33772000	16468000	13422000	141490000	126630000	34725000	36147000	23956000	19169000	69158000	58229000	47055000	51549000	38461000	58232000
P62942	Peptidyl-prolyl cis-trans isomerase FKBP1A	FKBP1A	>sp|P62942|FKB1A_HUMAN Peptidyl-prolyl cis-trans isomerase FKBP1A OS=Homo sapiens GN=FKBP1A PE=1 SV=2	1	1	1	1686500	3095000	2280900	3978600	4127100	3685000	1	4127700	4148100	1	1476700	1	1	1	1	1	4105900	1	1	1	1
P62979;P0CG48;F5H041;Q96C32;P0CG47;J3QKN0;F5GXK7;F5H747;F5H388;B4DV12;F5H265;F5H2Z3;F5GYU3;P62987;F5H6Q2;J3QTR3;J3QS39;J3QRK5;J3QLP7;M0R2S1;M0R1M6;M0R1V7;J3KSM4;F5GZ39;K7EMA8;J3QSA3	Ubiquitin-40S ribosomal protein S27a;Ubiquitin;40S ribosomal protein S27a;Polyubiquitin-C;Ubiquitin;Polyubiquitin-B;Ubiquitin;Ubiquitin-60S ribosomal protein L40;Ubiquitin;60S ribosomal protein L40	RPS27A;UBC;UBB;UBA52	>sp|P62979|RS27A_HUMAN Ubiquitin-40S ribosomal protein S27a OS=Homo sapiens GN=RPS27A PE=1 SV=2;>sp|P0CG48|UBC_HUMAN Polyubiquitin-C OS=Homo sapiens GN=UBC PE=1 SV=3;>tr|F5H041|F5H041_HUMAN Polyubiquitin-C OS=Homo sapiens GN=UBC PE=2 SV=1;>tr|Q96C32|Q96C32	34002000	29723000	16236000	13221000	22961000	18075000	32288000	33093000	36613000	31248000	25468000	14937000	47143000	44049000	32408000	36419000	26234000	27742000	35105000	24630000	28513000	34175000	19412000	21935000
P63151-2;P63151;E5RIY1	Serine/threonine-protein phosphatase 2A 55 kDa regulatory subunit B alpha isoform	PPP2R2A	>sp|P63151-2|2ABA_HUMAN Isoform 2 of Serine/threonine-protein phosphatase 2A 55 kDa regulatory subunit B alpha isoform OS=Homo sapiens GN=PPP2R2A;>sp|P63151|2ABA_HUMAN Serine/threonine-protein phosphatase 2A 55 kDa regulatory subunit B alpha isoform OS=Hom	1	1	1	1	1	1537700	1	1	1	1	1	1	1	1	1	1	1	1	1	1	1	1	1	1
P63173;J3QL01;J3KT73;J3KSP2	60S ribosomal protein L38	RPL38	>sp|P63173|RL38_HUMAN 60S ribosomal protein L38 OS=Homo sapiens GN=RPL38 PE=1 SV=2;>tr|J3QL01|J3QL01_HUMAN 60S ribosomal protein L38 OS=Homo sapiens GN=RPL38 PE=2 SV=1;>tr|J3KT73|J3KT73_HUMAN 60S ribosomal protein L38 OS=Homo sapiens GN=RPL38 PE=2 SV=1	2013100000	2225100000	630550000	618440000	625500000	624960000	646110000	640540000	1037600000	858320000	816620000	796650000	1296700000	1122800000	895770000	874960000	1163100000	1053600000	1309000000	1572100000	716790000	665030000	1008100000	996650000
P63220;Q8WVC2;Q9BYK1;Q9BYK2	40S ribosomal protein S21	RPS21	>sp|P63220|RS21_HUMAN 40S ribosomal protein S21 OS=Homo sapiens GN=RPS21 PE=1 SV=1;>tr|Q8WVC2|Q8WVC2_HUMAN 40S ribosomal protein S21 OS=Homo sapiens GN=RPS21 PE=2 SV=1;>tr|Q9BYK1|Q9BYK1_HUMAN 40S ribosomal protein S21 OS=Homo sapiens GN=RPS21 PE=2 SV=1	314210000	304170000	45573000	58110000	35585000	44648000	59180000	67658000	52169000	48066000	60211000	49839000	111120000	142510000	57868000	61916000	70770000	84618000	40939000	26924000	53891000	42492000	27660000	33477000
P63244;J3KPE3;H0Y8W2;D6RHH4;D6R9L0;D6RAC2;D6R9Z1;D6REE5;H0YAM7;H0YAF8;D6RFX4;D6RFZ9;D6RBD0;E9PD14;D6RAU2;H0Y8R5;D6RF23;D6R909;H0Y9P0;D6RGK8;D6RHJ5;D6RDI0	Guanine nucleotide-binding protein subunit beta-2-like 1	GNB2L1	>sp|P63244|GBLP_HUMAN Guanine nucleotide-binding protein subunit beta-2-like 1 OS=Homo sapiens GN=GNB2L1 PE=1 SV=3;>tr|J3KPE3|J3KPE3_HUMAN Guanine nucleotide-binding protein subunit beta-2-like 1 OS=Homo sapiens GN=GNB2L1 PE=2 SV=1;>tr|H0Y8W2|H0Y8W2_HUMAN	1280500000	1271200000	128590000	129240000	90280000	54053000	39535000	36312000	27425000	25004000	125610000	141810000	425250000	417490000	26331000	45414000	141870000	180640000	209660000	66935000	42941000	26388000	23782000	31624000
P63261;I3L4N8;I3L1U9;I3L3I0;J3KT65;I3L3R2;K7EM38	Actin, cytoplasmic 2;Actin, cytoplasmic 2, N-terminally processed	ACTG1	>sp|P63261|ACTG_HUMAN Actin, cytoplasmic 2 OS=Homo sapiens GN=ACTG1 PE=1 SV=1;>tr|I3L4N8|I3L4N8_HUMAN Actin, cytoplasmic 2, N-terminally processed (Fragment) OS=Homo sapiens GN=ACTG1 PE=2 SV=1;>tr|I3L1U9|I3L1U9_HUMAN Actin, cytoplasmic 2, N-terminally proc	17366000	9647000	12538000	14219000	3402800	4226600	11153000	8059400	9323900	7728500	8875000	7465700	4999100	3068400	8582600	9213600	6531400	5335100	58837000	2060000	13085000	11686000	7792100	3753100
P63313	Thymosin beta-10	TMSB10	>sp|P63313|TYB10_HUMAN Thymosin beta-10 OS=Homo sapiens GN=TMSB10 PE=1 SV=2	13762000	16833000	10151000	12180000	5630500	3948600	1202700	1	6683800	1	1	1	4984700	7015700	1	2108700	1	1	1	1	1562900	1	1	1
P67809;H0Y449;P16989;P16989-3;P16989-2;Q9Y2T7;C9J5V9	Nuclease-sensitive element-binding protein 1;DNA-binding protein A	YBX1;CSDA	>sp|P67809|YBOX1_HUMAN Nuclease-sensitive element-binding protein 1 OS=Homo sapiens GN=YBX1 PE=1 SV=3;>tr|H0Y449|H0Y449_HUMAN Nuclease-sensitive element-binding protein 1 (Fragment) OS=Homo sapiens GN=YBX1 PE=4 SV=1;>sp|P16989|YBOX3_HUMAN Y-box-binding pro	104280000	101960000	62954000	52099000	66317000	66027000	69345000	69978000	52909000	48836000	56082000	56800000	79036000	85649000	77404000	74722000	73054000	89521000	70427000	46400000	62360000	61705000	34142000	31002000
P68032;P68133;P62736;P63267;A6NL76;Q5T8M8;Q5T8M7;P63267-2;F6QUT6;F6UVQ4;C9JFL5;B8ZZJ2;F8WB63;C9JUM1;F8WCH0	Actin, alpha cardiac muscle 1;Actin, alpha skeletal muscle;Actin, aortic smooth muscle;Actin, gamma-enteric smooth muscle	ACTC1;ACTA1;ACTA2;ACTG2	>sp|P68032|ACTC_HUMAN Actin, alpha cardiac muscle 1 OS=Homo sapiens GN=ACTC1 PE=1 SV=1;>sp|P68133|ACTS_HUMAN Actin, alpha skeletal muscle OS=Homo sapiens GN=ACTA1 PE=1 SV=1;>sp|P62736|ACTA_HUMAN Actin, aortic smooth muscle OS=Homo sapiens GN=ACTA2 PE=1 SV=	97415000	938650000	823560000	210640000	250420000	84815000	460430000	513750000	519350000	436200000	566110000	490460000	226880000	257210000	383440000	375250000	384900000	413670000	510440000	732470000	633360000	652850000	594960000	637500000
P68104;Q5VTE0;Q5JR01;A6PW80	Elongation factor 1-alpha 1;Putative elongation factor 1-alpha-like 3	EEF1A1;EEF1A1P5	>sp|P68104|EF1A1_HUMAN Elongation factor 1-alpha 1 OS=Homo sapiens GN=EEF1A1 PE=1 SV=1;>sp|Q5VTE0|EF1A3_HUMAN Putative elongation factor 1-alpha-like 3 OS=Homo sapiens GN=EEF1A1P5 PE=5 SV=1	1097100000	1078400000	1602700000	1606800000	3262100000	3068000000	898990000	864380000	945110000	858130000	689230000	718300000	1323800000	1260100000	827750000	814220000	762680000	673860000	1003100000	993290000	1127900000	987530000	1062000000	1021200000
P68363;CON__ENSEMBL:ENSBTAP00000016242;F8VVB9;F8VQQ4;F8VS66;F8VRZ4;F8VWV9;F8VX09;F8VRK0;F8W0F6;F8VXZ7	Tubulin alpha-1B chain	TUBA1B	>sp|P68363|TBA1B_HUMAN Tubulin alpha-1B chain OS=Homo sapiens GN=TUBA1B PE=1 SV=1;>ENSEMBL:ENSBTAP00000016242 (Bos taurus) similar to alpha-tubulin I isoform 1;>tr|F8VVB9|F8VVB9_HUMAN Tubulin alpha-1B chain (Fragment) OS=Homo sapiens GN=TUBA1B PE=2 SV=1	1169200000	1143900000	1174900000	1083200000	2829300000	2575400000	769350000	646910000	638520000	567620000	633440000	523350000	736000000	719070000	745760000	639770000	571490000	610330000	752980000	641730000	719000000	754560000	678360000	623690000
P68366;A8MUB1;C9JDS9;C9JJQ8;C9JQ00;C9JEV8;C9JDL2;A6NHL2;A6NHL2-2;Q9H853;C9K0S6	Tubulin alpha-4A chain	TUBA4A	>sp|P68366|TBA4A_HUMAN Tubulin alpha-4A chain OS=Homo sapiens GN=TUBA4A PE=1 SV=1;>tr|A8MUB1|A8MUB1_HUMAN Tubulin alpha-4A chain OS=Homo sapiens GN=TUBA4A PE=2 SV=1	5207300	4209300	4263300	5612700	8759700	21257000	4149100	5366000	6552700	6389400	1	1	3222500	1	6127300	1	1	3926800	3171400	1	3632000	4939700	6190700	6088500
P68371;M0R2D3;M0QZL7;M0QY85;M0QYM7;M0QX14;M0QY37;M0R0X0;M0R042;M0R2T4	Tubulin beta-4B chain	TUBB4B	>sp|P68371|TBB4B_HUMAN Tubulin beta-4B chain OS=Homo sapiens GN=TUBB4B PE=1 SV=1	984760000	1051400000	1114800000	1168600000	2951700000	3007300000	718330000	777610000	664200000	608980000	667640000	658800000	722870000	798620000	733730000	751870000	675690000	712430000	711180000	756130000	704710000	831180000	675950000	698770000
P68400;E7EU96;Q8NEV1;P68400-2	Casein kinase II subunit alpha	CSNK2A1;hCG_21984	>sp|P68400|CSK21_HUMAN Casein kinase II subunit alpha OS=Homo sapiens GN=CSNK2A1 PE=1 SV=1;>tr|E7EU96|E7EU96_HUMAN Casein kinase II subunit alpha OS=Homo sapiens GN=CSNK2A1 PE=2 SV=1;>sp|Q8NEV1|CSK23_HUMAN Casein kinase II subunit alpha 3 OS=Homo sapiens G	39175000	49191000	16710000	32911000	19691000	27749000	31573000	23489000	39103000	13112000	22643000	20871000	23019000	23604000	14350000	16384000	20021000	19392000	18018000	20106000	18195000	17775000	15434000	15051000
P78332;E9PGM9;P78332-2;B4E0G6;B4DNY1;F8WCA5;C9J250	RNA-binding protein 6	RBM6	>sp|P78332|RBM6_HUMAN RNA-binding protein 6 OS=Homo sapiens GN=RBM6 PE=1 SV=5;>tr|E9PGM9|E9PGM9_HUMAN RNA-binding protein 6 OS=Homo sapiens GN=RBM6 PE=2 SV=1;>sp|P78332-2|RBM6_HUMAN Isoform 2 of RNA-binding protein 6 OS=Homo sapiens GN=RBM6;>tr|B4E0G6|B4E0	1	10672000	23582000	23013000	15839000	16611000	27948000	27931000	27912000	30284000	28462000	28227000	16022000	17506000	24996000	28086000	32792000	23501000	28473000	19326000	24464000	26134000	19973000	25361000
P78371;F5GWF6;P78371-2;F8VQ14	T-complex protein 1 subunit beta	CCT2	>sp|P78371|TCPB_HUMAN T-complex protein 1 subunit beta OS=Homo sapiens GN=CCT2 PE=1 SV=4;>tr|F5GWF6|F5GWF6_HUMAN T-complex protein 1 subunit beta OS=Homo sapiens GN=CCT2 PE=2 SV=2;>sp|P78371-2|TCPB_HUMAN Isoform 2 of T-complex protein 1 subunit beta OS=Hom	380440000	451840000	532540000	499030000	656050000	639160000	282190000	293130000	273910000	279460000	214910000	247350000	314790000	408930000	278310000	302790000	240030000	230910000	251440000	234020000	281110000	307810000	277470000	282330000
P78417;P78417-3;P78417-2;Q5TA02;Q5TA01	Glutathione S-transferase omega-1	GSTO1	>sp|P78417|GSTO1_HUMAN Glutathione S-transferase omega-1 OS=Homo sapiens GN=GSTO1 PE=1 SV=2;>sp|P78417-3|GSTO1_HUMAN Isoform 3 of Glutathione S-transferase omega-1 OS=Homo sapiens GN=GSTO1;>sp|P78417-2|GSTO1_HUMAN Isoform 2 of Glutathione S-transferase ome	1	1	1	1	1	1	1	1	1	1	1	1	1	1	1	1	1	1	1	1	1615000	1	1	1
P78527;P78527-2;E7EUY0	DNA-dependent protein kinase catalytic subunit	PRKDC	>sp|P78527|PRKDC_HUMAN DNA-dependent protein kinase catalytic subunit OS=Homo sapiens GN=PRKDC PE=1 SV=3;>sp|P78527-2|PRKDC_HUMAN Isoform 2 of DNA-dependent protein kinase catalytic subunit OS=Homo sapiens GN=PRKDC;>tr|E7EUY0|E7EUY0_HUMAN DNA-dependent pro	3209100	2619900	2187100	1969400	7116400	5103000	1	1	1	1	1	1	1	1	1	1	1367400	2649800	1	1	1787100	1	1	1
P81605;P81605-2	Dermcidin;Survival-promoting peptide;DCD-1	DCD	>sp|P81605|DCD_HUMAN Dermcidin OS=Homo sapiens GN=DCD PE=1 SV=2;>sp|P81605-2|DCD_HUMAN Isoform 2 of Dermcidin OS=Homo sapiens GN=DCD	157670000	144660000	142810000	142760000	103880000	96725000	241450000	218350000	140000000	139940000	86464000	86762000	88349000	82753000	186900000	171300000	90944000	88017000	128910000	129310000	199920000	201340000	136240000	140810000
P82675	28S ribosomal protein S5, mitochondrial	MRPS5	>sp|P82675|RT05_HUMAN 28S ribosomal protein S5, mitochondrial OS=Homo sapiens GN=MRPS5 PE=1 SV=2	15117000	4386000	3014600	1	3717500	4984500	1	1	1	3081600	1	1	4668000	4793300	3092000	3034000	1	3027700	1	2979800	1	3443600	1	3453400
P83731;C9JNW5;C9JXB8	60S ribosomal protein L24	RPL24	>sp|P83731|RL24_HUMAN 60S ribosomal protein L24 OS=Homo sapiens GN=RPL24 PE=1 SV=1;>tr|C9JNW5|C9JNW5_HUMAN 60S ribosomal protein L24 OS=Homo sapiens GN=RPL24 PE=2 SV=1;>tr|C9JXB8|C9JXB8_HUMAN 60S ribosomal protein L24 OS=Homo sapiens GN=RPL24 PE=2 SV=1	326920000	321850000	117300000	124960000	268550000	291950000	160380000	152960000	135250000	122860000	151890000	147180000	198210000	184170000	165140000	155100000	177950000	178630000	116280000	119420000	168610000	192400000	124640000	115420000
P84090;G3V279	Enhancer of rudimentary homolog	ERH	>sp|P84090|ERH_HUMAN Enhancer of rudimentary homolog OS=Homo sapiens GN=ERH PE=1 SV=1;>tr|G3V279|G3V279_HUMAN Enhancer of rudimentary homolog OS=Homo sapiens GN=ERH PE=2 SV=1	1208300000	1553600000	1893200000	2195000000	512560000	561420000	3746900000	3973800000	3737500000	3459600000	4106100000	3895900000	1830800000	1665100000	2824800000	2631100000	2336300000	2386700000	2906100000	3337600000	2873300000	3136100000	2437000000	3093700000
P84098;J3KTE4;J3QR09;J3QL15	60S ribosomal protein L19	RPL19	>sp|P84098|RL19_HUMAN 60S ribosomal protein L19 OS=Homo sapiens GN=RPL19 PE=1 SV=1;>tr|J3KTE4|J3KTE4_HUMAN Ribosomal protein L19 OS=Homo sapiens GN=RPL19 PE=2 SV=1;>tr|J3QR09|J3QR09_HUMAN Ribosomal protein L19 OS=Homo sapiens GN=RPL19 PE=2 SV=1	447430000	453100000	76384000	68539000	115090000	105300000	99973000	94668000	90566000	105060000	101380000	139350000	324950000	499100000	126390000	126200000	213250000	194510000	97071000	74593000	133330000	121900000	87398000	95548000
P84103;B4E241	Serine/arginine-rich splicing factor 3	SRSF3	>sp|P84103|SRSF3_HUMAN Serine/arginine-rich splicing factor 3 OS=Homo sapiens GN=SRSF3 PE=1 SV=1;>tr|B4E241|B4E241_HUMAN Serine/arginine-rich-splicing factor 3 OS=Homo sapiens GN=SFRS3 PE=2 SV=1	138560000	126290000	53488000	48929000	61061000	57992000	62840000	63600000	54271000	66583000	63106000	70587000	80647000	86097000	56120000	55557000	50427000	59816000	44737000	44023000	37132000	29125000	49352000	45847000
P98175;P98175-3	RNA-binding protein 10	RBM10	>sp|P98175|RBM10_HUMAN RNA-binding protein 10 OS=Homo sapiens GN=RBM10 PE=1 SV=3;>sp|P98175-3|RBM10_HUMAN Isoform 3 of RNA-binding protein 10 OS=Homo sapiens GN=RBM10	1	3200000	1	1	1	1	1	1	1	1	1	1	1	1	1	1	1	1	1	1	1	1	1	1
P98175-2;P98175-4			>sp|P98175-2|RBM10_HUMAN Isoform 2 of RNA-binding protein 10 OS=Homo sapiens GN=RBM10;>sp|P98175-4|RBM10_HUMAN Isoform 4 of RNA-binding protein 10 OS=Homo sapiens GN=RBM10	1310400000	1314500000	2120800000	2096400000	857090000	867520000	3075000000	3174500000	2551000000	2709000000	3111800000	2994100000	1497300000	1588800000	2529900000	2624000000	2451000000	2355600000	2566600000	2648000000	2935300000	2965000000	2121700000	2126200000
P98179	Putative RNA-binding protein 3	RBM3	>sp|P98179|RBM3_HUMAN Putative RNA-binding protein 3 OS=Homo sapiens GN=RBM3 PE=1 SV=1	8743400	11405000	7660800	9841900	4783400	7319600	5253100	10397000	9802300	4615600	4207500	4974400	37326000	46014000	6021000	6444900	7277400	8789900	8581700	8548500	15439000	14449000	8119500	11383000
Q00325;Q00325-2;F8VVM2;F8VWQ0;F8VWR4;F8VZL5	Phosphate carrier protein, mitochondrial	SLC25A3	>sp|Q00325|MPCP_HUMAN Phosphate carrier protein, mitochondrial OS=Homo sapiens GN=SLC25A3 PE=1 SV=2;>sp|Q00325-2|MPCP_HUMAN Isoform B of Phosphate carrier protein, mitochondrial OS=Homo sapiens GN=SLC25A3;>tr|F8VVM2|F8VVM2_HUMAN Phosphate carrier protein,	13443000	18350000	30101000	26529000	65217000	58940000	20237000	22697000	25546000	25853000	24716000	26002000	27561000	29666000	33146000	32321000	29774000	30774000	25744000	27257000	23519000	23828000	27008000	23584000
Q00610;Q00610-2;J3KS13;P53675;P53675-2;J3KR87;K7EJJ5;F5H5N6;J3KRF5;J3KSQ2	Clathrin heavy chain 1	CLTC	>sp|Q00610|CLH1_HUMAN Clathrin heavy chain 1 OS=Homo sapiens GN=CLTC PE=1 SV=5;>sp|Q00610-2|CLH1_HUMAN Isoform 2 of Clathrin heavy chain 1 OS=Homo sapiens GN=CLTC	49853000	60862000	43512000	54788000	38726000	53619000	4342000	2060200	3551100	1	1	1	16762000	12607000	4644700	7092000	964430	1954100	2846000	2110200	1149300	2670800	3289600	2749600
Q00839;Q00839-2;Q5RI18	Heterogeneous nuclear ribonucleoprotein U	HNRNPU	>sp|Q00839|HNRPU_HUMAN Heterogeneous nuclear ribonucleoprotein U OS=Homo sapiens GN=HNRNPU PE=1 SV=6;>sp|Q00839-2|HNRPU_HUMAN Isoform Short of Heterogeneous nuclear ribonucleoprotein U OS=Homo sapiens GN=HNRNPU	215350000	180350000	147890000	114880000	158230000	124520000	102400000	99512000	90551000	109460000	102650000	100610000	134570000	135180000	99762000	115070000	101430000	108530000	80208000	97453000	101210000	91636000	75770000	71774000
Q01081;Q01081-2;Q01081-4;Q8WU68;Q8WU68-2;Q8WU68-3;M0R2N4;Q01081-3;M0QYK5;K7EJM7;K7EJH3;K7EPL9	Splicing factor U2AF 35 kDa subunit	U2AF1	>sp|Q01081|U2AF1_HUMAN Splicing factor U2AF 35 kDa subunit OS=Homo sapiens GN=U2AF1 PE=1 SV=3;>sp|Q01081-2|U2AF1_HUMAN Isoform 2 of Splicing factor U2AF 35 kDa subunit OS=Homo sapiens GN=U2AF1;>sp|Q01081-4|U2AF1_HUMAN Isoform 4 of Splicing factor U2AF 35 k	9397600	11854000	7832300	8305800	12614000	12807000	10661000	7066600	6342900	5063500	6676300	5501000	11475000	7949400	8612700	10269000	6889700	3652100	4957300	4760600	5769600	4483100	7868600	7129500
Q01082;Q01082-2;Q01082-3;F8W6C1;P11277-2;P11277;P11277-3;O15020;O15020-2;REV__Q96CN4-2;REV__Q96CN4;Q8N4A0;F8VUJ3;Q86UT5;Q86UT5-2;E9PPZ1;Q86UT5-3;REV__A6NFT4	Spectrin beta chain, brain 1	SPTBN1	>sp|Q01082|SPTB2_HUMAN Spectrin beta chain, non-erythrocytic 1 OS=Homo sapiens GN=SPTBN1 PE=1 SV=2;>sp|Q01082-2|SPTB2_HUMAN Isoform Short of Spectrin beta chain, non-erythrocytic 1 OS=Homo sapiens GN=SPTBN1;>sp|Q01082-3|SPTB2_HUMAN Isoform 2 of Spectrin be	473530000	513100000	711520000	703180000	549600000	591150000	785540000	774430000	697800000	689270000	722850000	720740000	411920000	428270000	513730000	544470000	471430000	478420000	644520000	671550000	747540000	760460000	601160000	546710000
Q01105;Q01105-2;Q01105-4;Q01105-3	Protein SET	SET	>sp|Q01105|SET_HUMAN Protein SET OS=Homo sapiens GN=SET PE=1 SV=3;>sp|Q01105-2|SET_HUMAN Isoform 2 of Protein SET OS=Homo sapiens GN=SET;>sp|Q01105-4|SET_HUMAN Isoform 4 of Protein SET OS=Homo sapiens GN=SET;>sp|Q01105-3|SET_HUMAN Isoform 3 of Protein SET	43045000	19674000	25216000	29801000	12835000	14997000	3824000	3924900	1	3696400	1863600	1	15791000	8280200	3194800	3484500	2493800	2427400	2907500	2897700	3038700	1	2210800	1
Q01130;B4DN89;J3KP15;J3QL05;Q9BRL6;Q9BRL6-2	Serine/arginine-rich splicing factor 2;Serine/arginine-rich splicing factor 8	SRSF2;SFRS2;SRSF8	>sp|Q01130|SRSF2_HUMAN Serine/arginine-rich splicing factor 2 OS=Homo sapiens GN=SRSF2 PE=1 SV=4;>tr|B4DN89|B4DN89_HUMAN Serine/arginine-rich-splicing factor 2 OS=Homo sapiens GN=SFRS2 PE=2 SV=1;>tr|J3KP15|J3KP15_HUMAN Serine/arginine-rich-splicing factor	60116000	39438000	21814000	21157000	35488000	33018000	35837000	25933000	25804000	24313000	21559000	26223000	28345000	40668000	32808000	40806000	24243000	19809000	16081000	15606000	12132000	9803500	20758000	31507000
Q01469;I6L8B7	Fatty acid-binding protein, epidermal	FABP5	>sp|Q01469|FABP5_HUMAN Fatty acid-binding protein, epidermal OS=Homo sapiens GN=FABP5 PE=1 SV=3;>tr|I6L8B7|I6L8B7_HUMAN Fatty acid-binding protein, epidermal OS=Homo sapiens GN=FABP5 PE=2 SV=1	15435000	7969400	13364000	13682000	6390500	5028800	4620600	5795700	11105000	14394000	1	8069500	11101000	6109500	2453700	6654100	9105400	5338400	15199000	16433000	7583400	12982000	7830000	7085700
Q01546;CON__Q01546	Keratin, type II cytoskeletal 2 oral	KRT76	>sp|Q01546|K22O_HUMAN Keratin, type II cytoskeletal 2 oral OS=Homo sapiens GN=KRT76 PE=1 SV=2;>Q01546 SWISS-PROT:Q01546 Tax_Id=9606 Gene_Symbol=KRT76 Keratin, type II cytoskeletal 2 oral	1	1	1	1	1	1	1	1	1	1	1	1	1	1	1	1	1	1	1	1	1	1	1	1
Q01668-2;Q01668;Q01668-3;Q01668-4	Voltage-dependent L-type calcium channel subunit alpha-1D	CACNA1D	>sp|Q01668-2|CAC1D_HUMAN Isoform Beta-cell-type of Voltage-dependent L-type calcium channel subunit alpha-1D OS=Homo sapiens GN=CACNA1D;>sp|Q01668|CAC1D_HUMAN Voltage-dependent L-type calcium channel subunit alpha-1D OS=Homo sapiens GN=CACNA1D PE=1 SV=2;>s	2908400	2384400	44243000	30918000	65767000	116300000	157300000	224540000	104840000	100430000	66468000	47679000	13751000	23577000	60604000	86913000	124160000	111730000	89317000	122900000	23980000	67753000	141260000	131300000
Q01804;Q01804-3;D6RI06;Q01804-2;Q7RTX8;Q01804-4;D6RA27	OTU domain-containing protein 4	OTUD4	>sp|Q01804|OTUD4_HUMAN OTU domain-containing protein 4 OS=Homo sapiens GN=OTUD4 PE=1 SV=3;>sp|Q01804-3|OTUD4_HUMAN Isoform 3 of OTU domain-containing protein 4 OS=Homo sapiens GN=OTUD4	18909000	19234000	24317000	24552000	8326600	5357400	31414000	33956000	33049000	28315000	42671000	37044000	18794000	14529000	28560000	25877000	23409000	18747000	22537000	27607000	33843000	38011000	25114000	31983000
Q01844-5;Q01844;Q01844-3;B0QYK0;Q01844-6;C9JGE3;Q01844-2;H7BY36	RNA-binding protein EWS	EWSR1	>sp|Q01844-5|EWS_HUMAN Isoform 5 of RNA-binding protein EWS OS=Homo sapiens GN=EWSR1;>sp|Q01844|EWS_HUMAN RNA-binding protein EWS OS=Homo sapiens GN=EWSR1 PE=1 SV=1;>sp|Q01844-3|EWS_HUMAN Isoform 3 of RNA-binding protein EWS OS=Homo sapiens GN=EWSR1;>tr|B0	11420000	10739000	5972100	6785600	6869700	4799800	7716800	8622900	8761700	9584600	5874400	6263900	180300000	230800000	9248200	6482800	10902000	9624000	1	1	17624000	12603000	18743000	26193000
Q02413;B7Z845	Desmoglein-1	DSG1	>sp|Q02413|DSG1_HUMAN Desmoglein-1 OS=Homo sapiens GN=DSG1 PE=1 SV=2	57186000	67002000	80730000	73694000	76311000	72710000	70571000	82171000	65238000	89744000	67212000	78400000	47193000	53559000	114470000	94354000	103460000	76758000	111560000	131380000	77737000	82193000	208940000	229140000
Q02543;M0R117;M0R1A7;M0R3D6;M0R0P7	60S ribosomal protein L18a	RPL18A	>sp|Q02543|RL18A_HUMAN 60S ribosomal protein L18a OS=Homo sapiens GN=RPL18A PE=1 SV=2;>tr|M0R117|M0R117_HUMAN 60S ribosomal protein L18a OS=Homo sapiens GN=RPL18A PE=2 SV=1;>tr|M0R1A7|M0R1A7_HUMAN 60S ribosomal protein L18a OS=Homo sapiens GN=RPL18A PE=2 S	2917700000	2934700000	791390000	718770000	1249700000	1087800000	943830000	991900000	1055600000	1028800000	1009700000	1015400000	1608400000	1618300000	1291400000	1347700000	1203300000	1514800000	1050700000	1152200000	1167200000	1157700000	907010000	1091400000
Q02818;H7BZI1;C9JKZ2;C9J3C1;C9JBD3	Nucleobindin-1	NUCB1	>sp|Q02818|NUCB1_HUMAN Nucleobindin-1 OS=Homo sapiens GN=NUCB1 PE=1 SV=4;>tr|H7BZI1|H7BZI1_HUMAN Nucleobindin-1 (Fragment) OS=Homo sapiens GN=NUCB1 PE=4 SV=1;>tr|C9JKZ2|C9JKZ2_HUMAN Nucleobindin-1 (Fragment) OS=Homo sapiens GN=NUCB1 PE=2 SV=1	1	1	6766100	6325400	8931300	9107100	10192000	10011000	12196000	13733000	10236000	10013000	8263500	6213300	10747000	11379000	8774300	8292100	12273000	10853000	19054000	15284000	11069000	10458000
Q02878;U3KQR5;F8VZ45;F8VR69;F8VU16;F8VWR1;F8VZA3	60S ribosomal protein L6	RPL6	>sp|Q02878|RL6_HUMAN 60S ribosomal protein L6 OS=Homo sapiens GN=RPL6 PE=1 SV=3	2845600000	2615800000	242190000	246260000	391250000	388530000	267660000	262250000	256190000	269580000	458790000	394440000	1496300000	1477800000	331940000	324400000	568840000	586460000	307930000	286120000	346050000	321240000	220450000	213770000
Q02952;Q02952-2;Q02952-3	A-kinase anchor protein 12	AKAP12	>sp|Q02952|AKA12_HUMAN A-kinase anchor protein 12 OS=Homo sapiens GN=AKAP12 PE=1 SV=4;>sp|Q02952-2|AKA12_HUMAN Isoform 2 of A-kinase anchor protein 12 OS=Homo sapiens GN=AKAP12;>sp|Q02952-3|AKA12_HUMAN Isoform 3 of A-kinase anchor protein 12 OS=Homo sapien	8783900	6158500	6850000	4551900	20752000	17184000	2515500	1	1	1	1	1	2415000	4096400	3101000	2925400	2876600	1	1	1	1	1	1	1
Q03135;E9PCT5;Q03135-2;C9JKI3;P56539	Caveolin-1;Caveolin	CAV1	>sp|Q03135|CAV1_HUMAN Caveolin-1 OS=Homo sapiens GN=CAV1 PE=1 SV=4;>tr|E9PCT5|E9PCT5_HUMAN Caveolin OS=Homo sapiens GN=CAV1 PE=2 SV=1	22548000	23413000	26978000	23180000	17468000	13582000	47264000	54399000	61570000	58923000	50153000	55934000	93150000	75260000	125380000	99207000	118220000	123450000	53530000	64374000	67617000	55086000	53474000	60838000
Q03393;E9PNN3;E9PJM0;E9PKY8	6-pyruvoyl tetrahydrobiopterin synthase	PTS	>sp|Q03393|PTPS_HUMAN 6-pyruvoyl tetrahydrobiopterin synthase OS=Homo sapiens GN=PTS PE=1 SV=1;>tr|E9PNN3|E9PNN3_HUMAN 6-pyruvoyl tetrahydrobiopterin synthase OS=Homo sapiens GN=PTS PE=2 SV=1;>tr|E9PJM0|E9PJM0_HUMAN 6-pyruvoyl tetrahydrobiopterin synthase	26672000	25939000	42132000	46314000	20363000	26992000	35055000	36056000	34675000	32710000	37702000	33939000	24709000	21325000	25384000	23975000	22149000	22839000	39732000	40691000	34738000	30049000	21035000	28442000
Q04637-9;Q04637-8;Q04637;E7EUU4;Q04637-3;E9PGM1;Q04637-4;E7EX73;Q04637-5;Q04637-7;Q04637-6;H7C044;C9JF13;C9J6B6	Eukaryotic translation initiation factor 4 gamma 1	EIF4G1	>sp|Q04637-9|IF4G1_HUMAN Isoform 9 of Eukaryotic translation initiation factor 4 gamma 1 OS=Homo sapiens GN=EIF4G1;>sp|Q04637-8|IF4G1_HUMAN Isoform 8 of Eukaryotic translation initiation factor 4 gamma 1 OS=Homo sapiens GN=EIF4G1;>sp|Q04637|IF4G1_HUMAN Euk	3286300	3367000	2684500	3361300	5014800	3768200	1	1	1	1	1	1	3113700	2580300	1846600	1	1	1	1	1	1	1	1	1
Q05519;Q05519-2;Q5T760;Q5T757;B4DTC1;B4DWT1;S4R3C4	Serine/arginine-rich splicing factor 11	SRSF11;SFRS11	>sp|Q05519|SRS11_HUMAN Serine/arginine-rich splicing factor 11 OS=Homo sapiens GN=SRSF11 PE=1 SV=1;>sp|Q05519-2|SRS11_HUMAN Isoform 2 of Serine/arginine-rich splicing factor 11 OS=Homo sapiens GN=SRSF11;>tr|Q5T760|Q5T760_HUMAN Serine/arginine-rich-splicing	8657600	20968000	10785000	12160000	28762000	18361000	11979000	9197400	12931000	12390000	10689000	10198000	11272000	11148000	10917000	10373000	11625000	10761000	14538000	9129300	10675000	9132800	13099000	14183000
Q05639;REV__Q6NUS8;REV__B7Z8Q8;REV__E9PD17	Elongation factor 1-alpha 2	EEF1A2	>sp|Q05639|EF1A2_HUMAN Elongation factor 1-alpha 2 OS=Homo sapiens GN=EEF1A2 PE=1 SV=1	634170000	559720000	501530000	407700000	494130000	632740000	235770000	199850000	265530000	176220000	113430000	83688000	275950000	239240000	222620000	139510000	126470000	149890000	179870000	57847000	132150000	91162000	135380000	133670000
Q06830;Q13162;H7C3T4	Peroxiredoxin-1	PRDX1	>sp|Q06830|PRDX1_HUMAN Peroxiredoxin-1 OS=Homo sapiens GN=PRDX1 PE=1 SV=1	435930000	383730000	405080000	424510000	351840000	365200000	319960000	322810000	270490000	299030000	263060000	278630000	296470000	309010000	265650000	264700000	231860000	244950000	313230000	311560000	331710000	342490000	310010000	322800000
Q07021;I3L3B0;I3L3Q7	Complement component 1 Q subcomponent-binding protein, mitochondrial	C1QBP	>sp|Q07021|C1QBP_HUMAN Complement component 1 Q subcomponent-binding protein, mitochondrial OS=Homo sapiens GN=C1QBP PE=1 SV=1;>tr|I3L3B0|I3L3B0_HUMAN Complement component 1 Q subcomponent-binding protein, mitochondrial OS=Homo sapiens GN=C1QBP PE=2 SV=1;>	45686000	58926000	46553000	49788000	68894000	48743000	49547000	48365000	50547000	25244000	41520000	40372000	39154000	42818000	46409000	47484000	33443000	24401000	33794000	36694000	39589000	38580000	27765000	40821000
Q07283	Trichohyalin	TCHH	>sp|Q07283|TRHY_HUMAN Trichohyalin OS=Homo sapiens GN=TCHH PE=1 SV=2	2768800	122920	9771600	12388000	7968700	12226000	15368000	12745000	5142600	21455000	15305000	27565000	10897000	11149000	22800000	3030600	22230000	20444000	18209000	12537000	32878000	31924000	22981000	21993000
Q07666;Q07666-2;Q07666-3	KH domain-containing, RNA-binding, signal transduction-associated protein 1	KHDRBS1	>sp|Q07666|KHDR1_HUMAN KH domain-containing, RNA-binding, signal transduction-associated protein 1 OS=Homo sapiens GN=KHDRBS1 PE=1 SV=1;>sp|Q07666-2|KHDR1_HUMAN Isoform 2 of KH domain-containing, RNA-binding, signal transduction-associated protein 1 OS=Hom	61666000	37940000	48864000	57830000	17313000	16146000	28980000	18362000	28006000	28955000	32581000	55432000	39327000	42864000	23242000	26684000	22453000	23331000	33698000	22713000	14397000	14859000	22021000	12597000
Q08188	Protein-glutamine gamma-glutamyltransferase E;Protein-glutamine gamma-glutamyltransferase E 50 kDa catalytic chain;Protein-glutamine gamma-glutamyltransferase E 27 kDa non-catalytic chain	TGM3	>sp|Q08188|TGM3_HUMAN Protein-glutamine gamma-glutamyltransferase E OS=Homo sapiens GN=TGM3 PE=1 SV=4	1319600	1864600	4892700	1	2713200	1	3634000	5595400	3084900	2864500	4515400	1	3983600	2297400	6503200	3193700	2094700	2571700	2706600	3035500	1	5653400	3306100	7937700
Q08211	ATP-dependent RNA helicase A	DHX9	>sp|Q08211|DHX9_HUMAN ATP-dependent RNA helicase A OS=Homo sapiens GN=DHX9 PE=1 SV=4	1	9165100	9331600	5996300	8140600	7209200	5184800	6235000	5741100	6208600	6912600	12802000	4925700	4593300	4978100	6090100	5741900	9726500	4124300	7267600	5302000	6302300	4446600	9901400
Q08378;Q08378-2;Q08378-4	Golgin subfamily A member 3	GOLGA3	>sp|Q08378|GOGA3_HUMAN Golgin subfamily A member 3 OS=Homo sapiens GN=GOLGA3 PE=1 SV=2;>sp|Q08378-2|GOGA3_HUMAN Isoform 2 of Golgin subfamily A member 3 OS=Homo sapiens GN=GOLGA3;>sp|Q08378-4|GOGA3_HUMAN Isoform 3 of Golgin subfamily A member 3 OS=Homo sap	10392000	5988700	26626000	30834000	24534000	25744000	30761000	29865000	30391000	35353000	27510000	31781000	22831000	20946000	28893000	26136000	21158000	19589000	25619000	23403000	37465000	33529000	20768000	25303000
Q08431;F5H7N9;F5GZN3;Q08431-3;Q08431-2;H0YKS8	Lactadherin;Lactadherin short form;Medin	MFGE8	>sp|Q08431|MFGM_HUMAN Lactadherin OS=Homo sapiens GN=MFGE8 PE=1 SV=2;>tr|F5H7N9|F5H7N9_HUMAN Lactadherin short form OS=Homo sapiens GN=MFGE8 PE=2 SV=1;>tr|F5GZN3|F5GZN3_HUMAN Lactadherin short form OS=Homo sapiens GN=MFGE8 PE=2 SV=1;>sp|Q08431-3|MFGM_HUMAN	9415500	18335000	14365000	8728500	15812000	10930000	10985000	11302000	13349000	11943000	8917200	8957100	6011600	3799800	9282200	10666000	10071000	4755900	12089000	15244000	16288000	17518000	10185000	11677000
Q08554;Q08554-2	Desmocollin-1	DSC1	>sp|Q08554|DSC1_HUMAN Desmocollin-1 OS=Homo sapiens GN=DSC1 PE=1 SV=2;>sp|Q08554-2|DSC1_HUMAN Isoform 1B of Desmocollin-1 OS=Homo sapiens GN=DSC1	16553000	16616000	23950000	26879000	26249000	26293000	33586000	30993000	21926000	34588000	30200000	22231000	25948000	24782000	46373000	49108000	22777000	22681000	39730000	38950000	36962000	33856000	74656000	87848000
Q08945	FACT complex subunit SSRP1	SSRP1	>sp|Q08945|SSRP1_HUMAN FACT complex subunit SSRP1 OS=Homo sapiens GN=SSRP1 PE=1 SV=1	28943000	25278000	25370000	25611000	37256000	35334000	27214000	16933000	37181000	26588000	14181000	16848000	34281000	27370000	25230000	30433000	16477000	19376000	18968000	22226000	27735000	35957000	25531000	22193000
Q09028;Q09028-3;Q16576-2;Q16576;Q09028-2;E9PC52;Q09028-4;H0YDK2;H0YF10;H0YCT5;Q5JP02;B4DRT0;H0YEU5;Q5JP01;E9PNS6;E9PIC4;E9PNS2	Histone-binding protein RBBP4;Histone-binding protein RBBP7	RBBP4;RBBP7	>sp|Q09028|RBBP4_HUMAN Histone-binding protein RBBP4 OS=Homo sapiens GN=RBBP4 PE=1 SV=3;>sp|Q09028-3|RBBP4_HUMAN Isoform 3 of Histone-binding protein RBBP4 OS=Homo sapiens GN=RBBP4;>sp|Q16576-2|RBBP7_HUMAN Isoform 2 of Histone-binding protein RBBP7 OS=Homo	18227000	20436000	29540000	24805000	27608000	31591000	19718000	16925000	15254000	16097000	20116000	15772000	22240000	16406000	20583000	26293000	22780000	19093000	13265000	1	21815000	25137000	20397000	27799000
Q09666	Neuroblast differentiation-associated protein AHNAK	AHNAK	>sp|Q09666|AHNK_HUMAN Neuroblast differentiation-associated protein AHNAK OS=Homo sapiens GN=AHNAK PE=1 SV=2	1	5018500	11593000	7824300	21829000	23969000	6682000	7556200	1	5432100	6041200	7436300	7266900	6999200	5960800	4098900	6623200	5750800	5351900	1	1	5692500	1	1
Q12874;E7EUT8	Splicing factor 3A subunit 3	SF3A3	>sp|Q12874|SF3A3_HUMAN Splicing factor 3A subunit 3 OS=Homo sapiens GN=SF3A3 PE=1 SV=1;>tr|E7EUT8|E7EUT8_HUMAN Splicing factor 3A subunit 3 OS=Homo sapiens GN=SF3A3 PE=2 SV=1	13994000	15381000	23982000	22050000	7895100	6792500	34937000	19583000	28732000	14389000	32327000	30118000	20148000	22516000	24623000	22910000	25778000	19339000	21683000	24518000	27922000	27941000	15574000	19833000
Q12904-2;Q12904;D6R937	Aminoacyl tRNA synthase complex-interacting multifunctional protein 1;Endothelial monocyte-activating polypeptide 2	AIMP1	>sp|Q12904-2|AIMP1_HUMAN Isoform 2 of Aminoacyl tRNA synthase complex-interacting multifunctional protein 1 OS=Homo sapiens GN=AIMP1;>sp|Q12904|AIMP1_HUMAN Aminoacyl tRNA synthase complex-interacting multifunctional protein 1 OS=Homo sapiens GN=AIMP1 PE=1	2286900	1	1	1	7174400	1	2008500	1932700	1316200	1	1	1	1900900	1660200	1	2057300	1	1	1	1	1	1	1	1
Q12905	Interleukin enhancer-binding factor 2	ILF2	>sp|Q12905|ILF2_HUMAN Interleukin enhancer-binding factor 2 OS=Homo sapiens GN=ILF2 PE=1 SV=2	1	1	1	1	1	1	1	1	1	1	1	1	1	9439500	1	1	1	8591100	1	1	1	1	1	1
Q12906-7;Q12906;Q12906-3;Q12906-6;Q12906-2;Q12906-4;Q12906-5;K7EKJ9;K7ER69;K7EJ09;K7EM82;K7ENK6;K7ERM6	Interleukin enhancer-binding factor 3	ILF3	>sp|Q12906-7|ILF3_HUMAN Isoform 7 of Interleukin enhancer-binding factor 3 OS=Homo sapiens GN=ILF3;>sp|Q12906|ILF3_HUMAN Interleukin enhancer-binding factor 3 OS=Homo sapiens GN=ILF3 PE=1 SV=3;>sp|Q12906-3|ILF3_HUMAN Isoform 3 of Interleukin enhancer-bindi	10408000	8572800	10492000	9511300	9740700	19258000	8925600	9387200	8967000	9010900	9054200	12536000	7617500	8511200	14398000	11879000	9811300	8235400	1	9245300	13565000	17872000	8384500	1
Q13151	Heterogeneous nuclear ribonucleoprotein A0	HNRNPA0	>sp|Q13151|ROA0_HUMAN Heterogeneous nuclear ribonucleoprotein A0 OS=Homo sapiens GN=HNRNPA0 PE=1 SV=1	1	1	12907000	1	1	1	1	1	1	1	1	1	1	1	1	1	1	1	1	1	1	1	1	1
Q13185	Chromobox protein homolog 3	CBX3	>sp|Q13185|CBX3_HUMAN Chromobox protein homolog 3 OS=Homo sapiens GN=CBX3 PE=1 SV=4	1	560330	1170600	1339400	991200	32690000	40935000	1194300	1093500	1457000	907340	1226600	3449500	739270	1042200	1216500	1144800	10585000	1	448430	1602200	11515000	7738800	10026000
Q13200;E7EW34;E9PCS3;H7C1H2;H7C2Q3	26S proteasome non-ATPase regulatory subunit 2	PSMD2	>sp|Q13200|PSMD2_HUMAN 26S proteasome non-ATPase regulatory subunit 2 OS=Homo sapiens GN=PSMD2 PE=1 SV=3;>tr|E7EW34|E7EW34_HUMAN 26S proteasome non-ATPase regulatory subunit 2 OS=Homo sapiens GN=PSMD2 PE=2 SV=1;>tr|E9PCS3|E9PCS3_HUMAN 26S proteasome non-AT	9603500	7196700	35865000	39085000	47224000	50683000	20574000	20381000	22097000	29478000	17416000	11622000	22440000	24865000	35986000	36982000	23384000	16712000	26610000	25876000	20549000	23473000	18733000	24347000
Q13247;Q13247-3;Q08170;Q13243;Q13243-3;F6T1J1;B4DUA4;Q13247-2;B4DJK0	Serine/arginine-rich splicing factor 6	SRSF6	>sp|Q13247|SRSF6_HUMAN Serine/arginine-rich splicing factor 6 OS=Homo sapiens GN=SRSF6 PE=1 SV=2;>sp|Q13247-3|SRSF6_HUMAN Isoform SRP55-3 of Serine/arginine-rich splicing factor 6 OS=Homo sapiens GN=SRSF6	41737000	46128000	8480800	8648400	17546000	16612000	6305500	7986200	22304000	16768000	10137000	8780700	35323000	31467000	11319000	10097000	13143000	15720000	7093000	1	8320200	6331700	8864300	5186300
Q13283;F5H4D6;E5RIZ6;E5RJU8;Q5HYE9;E5RH42;E5RIF8;E5RI46;E5RH00;D6RGJ4;D6RBW8;D6RE13;D6RBR0;D6REX8;D6RBM9;D6R9A4;D6R9X5	Ras GTPase-activating protein-binding protein 1	G3BP1	>sp|Q13283|G3BP1_HUMAN Ras GTPase-activating protein-binding protein 1 OS=Homo sapiens GN=G3BP1 PE=1 SV=1;>tr|F5H4D6|F5H4D6_HUMAN Ras GTPase-activating protein-binding protein 1 OS=Homo sapiens GN=G3BP1 PE=2 SV=1	34972000	40504000	30695000	26901000	44813000	36722000	15066000	18928000	27752000	21636000	13688000	11734000	52011000	60380000	23849000	18936000	14237000	21006000	20956000	15298000	18380000	17653000	18621000	13669000
Q13310-3;Q13310;Q13310-2;B1ANR0;H0Y5F5;H0YEU6;H0YCC8;H0Y6X6;H0YER0	Polyadenylate-binding protein 4	PABPC4	>sp|Q13310-3|PABP4_HUMAN Isoform 3 of Polyadenylate-binding protein 4 OS=Homo sapiens GN=PABPC4;>sp|Q13310|PABP4_HUMAN Polyadenylate-binding protein 4 OS=Homo sapiens GN=PABPC4 PE=1 SV=1;>sp|Q13310-2|PABP4_HUMAN Isoform 2 of Polyadenylate-binding protein 4	16915000	17761000	23631000	12838000	24049000	25537000	11027000	16124000	10012000	6893300	9226800	14245000	13177000	10867000	8030900	16352000	8070500	10810000	8194300	6724300	4082300	5871200	5994000	5519300
Q13347;Q5TFK1	Eukaryotic translation initiation factor 3 subunit I	EIF3I	>sp|Q13347|EIF3I_HUMAN Eukaryotic translation initiation factor 3 subunit I OS=Homo sapiens GN=EIF3I PE=1 SV=1	82602000	58957000	161980000	159610000	131910000	138420000	144820000	142530000	146330000	173340000	148510000	128830000	136810000	144320000	158270000	164610000	139370000	135150000	100700000	110300000	143950000	154480000	111190000	115750000
Q13410;REV__P52948;REV__P52948-5;REV__P52948-2;REV__P52948-6;REV__J3KP29;REV__Q8NB25;REV__Q8NB25-3;REV__Q8NB25-2;REV__Q8NB25-4;REV__P52948-3;REV__H7BY63;REV__P52948-4;REV__E7EQ67	Butyrophilin subfamily 1 member A1	BTN1A1	>sp|Q13410|BT1A1_HUMAN Butyrophilin subfamily 1 member A1 OS=Homo sapiens GN=BTN1A1 PE=1 SV=3	48543000	38949000	48578000	45082000	63097000	66116000	65970000	68887000	51103000	41466000	73767000	62663000	37010000	29464000	59653000	57862000	23710000	47294000	47903000	28527000	86879000	65269000	39412000	45968000
Q13435;E9PPJ0;E9PJ04;H0YCG1;E9PJT3;H0YEX5;E9PIL8	Splicing factor 3B subunit 2	SF3B2	>sp|Q13435|SF3B2_HUMAN Splicing factor 3B subunit 2 OS=Homo sapiens GN=SF3B2 PE=1 SV=2;>tr|E9PPJ0|E9PPJ0_HUMAN Splicing factor 3B subunit 2 OS=Homo sapiens GN=SF3B2 PE=2 SV=1;>tr|E9PJ04|E9PJ04_HUMAN Splicing factor 3B subunit 2 (Fragment) OS=Homo sapiens G	294240000	332750000	403430000	486470000	371800000	350230000	771130000	775610000	689480000	646380000	749650000	735690000	450530000	486490000	653990000	679890000	591240000	481210000	584550000	535490000	858000000	788880000	477090000	494180000
Q13439-5;Q13439;Q13439-4;Q13439-3;H0Y6I0;E7EVX2	Golgin subfamily A member 4	GOLGA4	>sp|Q13439-5|GOGA4_HUMAN Isoform 5 of Golgin subfamily A member 4 OS=Homo sapiens GN=GOLGA4;>sp|Q13439|GOGA4_HUMAN Golgin subfamily A member 4 OS=Homo sapiens GN=GOLGA4 PE=1 SV=1;>sp|Q13439-4|GOGA4_HUMAN Isoform 4 of Golgin subfamily A member 4 OS=Homo sap	1	1	1	1	1	1	1	1	1	1	1	1	1	1	1	1	1	1	1	1	1	3813100	1	1
Q13464	Rho-associated protein kinase 1	ROCK1	>sp|Q13464|ROCK1_HUMAN Rho-associated protein kinase 1 OS=Homo sapiens GN=ROCK1 PE=1 SV=1	1	1	3225000	3100700	3229300	2952600	3412400	3083900	5119100	5138800	3705400	3348700	4527300	1	3804900	3565200	2998200	3627400	1	1	3857900	2960800	6065500	5152300
Q13509;A8K854;G3V2A3;G3V2N6;G3V3R4;G3V2R8;G3V5W4;G3V542	Tubulin beta-3 chain	TUBB3	>sp|Q13509|TBB3_HUMAN Tubulin beta-3 chain OS=Homo sapiens GN=TUBB3 PE=1 SV=2;>tr|A8K854|A8K854_HUMAN HCG1983504, isoform CRA_f OS=Homo sapiens GN=TUBB3 PE=2 SV=1	24827000	8000100	5966100	5287600	160930000	93018000	4904600	4866600	5634400	4816000	3492900	4765700	6624700	4946300	5888700	4905500	5571900	4614100	22783000	1	4223700	5042000	3122200	2745200
Q13547;F5GXM1	Histone deacetylase 1	HDAC1	>sp|Q13547|HDAC1_HUMAN Histone deacetylase 1 OS=Homo sapiens GN=HDAC1 PE=1 SV=1;>tr|F5GXM1|F5GXM1_HUMAN Histone deacetylase 1 OS=Homo sapiens GN=HDAC1 PE=2 SV=1	573200000	459790000	644660000	700710000	943950000	743250000	757970000	655580000	754990000	615000000	632570000	704990000	578590000	595300000	579380000	566850000	560700000	552970000	654110000	630010000	868740000	696740000	552710000	497960000
Q13643	Four and a half LIM domains protein 3	FHL3	>sp|Q13643|FHL3_HUMAN Four and a half LIM domains protein 3 OS=Homo sapiens GN=FHL3 PE=1 SV=4	1	1	930280	990590	20203000	7701400	1	1	1	1	1033100	1	1	1	1	974350	1	1	1140500	1130300	707580	1	1	1110500
Q13671;Q13671-2;E9PNR2;E7EM96;E9PMB8	Ras and Rab interactor 1	RIN1	>sp|Q13671|RIN1_HUMAN Ras and Rab interactor 1 OS=Homo sapiens GN=RIN1 PE=1 SV=4;>sp|Q13671-2|RIN1_HUMAN Isoform RIN1-delta of Ras and Rab interactor 1 OS=Homo sapiens GN=RIN1;>tr|E9PNR2|E9PNR2_HUMAN Ras and Rab interactor 1 OS=Homo sapiens GN=RIN1 PE=2 SV	233600	229000	1249300	1	856410	1	1	2060400	27071000	14520000	6513900	2743700	342150000	416470000	586150000	578950000	547150000	661570000	22592000	35227000	19432000	7419200	3576200	12836000
Q13813;A6NG51;Q13813-2;Q13813-3	Spectrin alpha chain, brain	SPTAN1	>sp|Q13813|SPTN1_HUMAN Spectrin alpha chain, non-erythrocytic 1 OS=Homo sapiens GN=SPTAN1 PE=1 SV=3;>tr|A6NG51|A6NG51_HUMAN Spectrin alpha chain, non-erythrocytic 1 OS=Homo sapiens GN=SPTAN1 PE=2 SV=2;>sp|Q13813-2|SPTN1_HUMAN Isoform 2 of Spectrin alpha ch	458650000	512440000	609460000	625710000	568040000	557860000	793350000	779440000	722930000	682100000	727100000	705380000	440680000	434920000	561880000	599510000	468890000	455270000	599740000	638920000	705460000	757890000	557240000	590530000
Q13823;H0YG10	Nucleolar GTP-binding protein 2	GNL2	>sp|Q13823|NOG2_HUMAN Nucleolar GTP-binding protein 2 OS=Homo sapiens GN=GNL2 PE=1 SV=1;>tr|H0YG10|H0YG10_HUMAN Nucleolar GTP-binding protein 2 (Fragment) OS=Homo sapiens GN=GNL2 PE=4 SV=1	1	3697300	1	1	1	1	1	1	1	1	1	1	806110	821640	1	1	1	1	1	1	1	1	1	1
Q13835;Q13835-2	Plakophilin-1	PKP1	>sp|Q13835|PKP1_HUMAN Plakophilin-1 OS=Homo sapiens GN=PKP1 PE=1 SV=2;>sp|Q13835-2|PKP1_HUMAN Isoform 1 of Plakophilin-1 OS=Homo sapiens GN=PKP1	1	2066900	1466100	1048400	1827500	1545500	1225400	901950	1073600	1044600	1	1	1553100	2619000	1587500	975480	2831200	1028700	1718400	3196800	1338000	1	5271200	7684800
Q13885;Q9BVA1	Tubulin beta-2A chain;Tubulin beta-2B chain	TUBB2A;TUBB2B	>sp|Q13885|TBB2A_HUMAN Tubulin beta-2A chain OS=Homo sapiens GN=TUBB2A PE=1 SV=1;>sp|Q9BVA1|TBB2B_HUMAN Tubulin beta-2B chain OS=Homo sapiens GN=TUBB2B PE=1 SV=1	3873500	5310800	3790700	2429800	9886600	10203000	1	1	1	1	1	2755600	2335400	2279400	2193700	2330400	1	3056500	1	1	1	1	1	1
Q13895;H7BY94	Bystin	BYSL	>sp|Q13895|BYST_HUMAN Bystin OS=Homo sapiens GN=BYSL PE=1 SV=3;>tr|H7BY94|H7BY94_HUMAN Bystin (Fragment) OS=Homo sapiens GN=BYSL PE=4 SV=1	6056900	9678000	925770	1	1	1	1	1	1	1	1	1	2398500	2551000	1	1	1	1	1	1	1	1	1	1
Q14008-3;Q14008;Q14008-2;E9PQH5;H0YDX5;H0YEK7;H0YCF6	Cytoskeleton-associated protein 5	CKAP5	>sp|Q14008-3|CKAP5_HUMAN Isoform 3 of Cytoskeleton-associated protein 5 OS=Homo sapiens GN=CKAP5;>sp|Q14008|CKAP5_HUMAN Cytoskeleton-associated protein 5 OS=Homo sapiens GN=CKAP5 PE=1 SV=3;>sp|Q14008-2|CKAP5_HUMAN Isoform 2 of Cytoskeleton-associated prote	25197000	26668000	34070000	30413000	25907000	22284000	14694000	18270000	23041000	24881000	17471000	23352000	24909000	19090000	22714000	21213000	17477000	13949000	17696000	16171000	17398000	17467000	21006000	21027000
Q14011;D6W5Y5;B4E2X2;K7EQR7;K7ER40;K7EPM4;K7EMY9;K7ELT6;K7EJV5;K7ENX8;K7ELV6	Cold-inducible RNA-binding protein	CIRBP	>sp|Q14011|CIRBP_HUMAN Cold-inducible RNA-binding protein OS=Homo sapiens GN=CIRBP PE=1 SV=1;>tr|D6W5Y5|D6W5Y5_HUMAN Cold inducible RNA binding protein, isoform CRA_c OS=Homo sapiens GN=CIRBP PE=2 SV=1;>tr|B4E2X2|B4E2X2_HUMAN Cold-inducible RNA-binding pro	1	15681000	12678000	13561000	7652400	7251600	15866000	12090000	15945000	17654000	31756000	22277000	20913000	22005000	14604000	12171000	10074000	13258000	20073000	15859000	26962000	19867000	13898000	12810000
Q14019;H3BT58	Coactosin-like protein	COTL1	>sp|Q14019|COTL1_HUMAN Coactosin-like protein OS=Homo sapiens GN=COTL1 PE=1 SV=3;>tr|H3BT58|H3BT58_HUMAN Coactosin-like protein OS=Homo sapiens GN=COTL1 PE=2 SV=1	5360800	7123900	3703400	4423800	3842800	3498000	1	1	1	1	1	1	1718800	1	2228000	1	1	1	1	1	1	1	1	2373100
Q14103;Q14103-3;D6RAF8;Q14103-2;B4DTC3;Q14103-4;H0Y8G5;H0YA96;D6RF44;D6RBQ9;D6RD83;F5H6R6	Heterogeneous nuclear ribonucleoprotein D0	HNRNPD	>sp|Q14103|HNRPD_HUMAN Heterogeneous nuclear ribonucleoprotein D0 OS=Homo sapiens GN=HNRNPD PE=1 SV=1;>sp|Q14103-3|HNRPD_HUMAN Isoform 3 of Heterogeneous nuclear ribonucleoprotein D0 OS=Homo sapiens GN=HNRNPD;>tr|D6RAF8|D6RAF8_HUMAN Heterogeneous nuclear r	59694000	65104000	68487000	53206000	57342000	43938000	31382000	38269000	37917000	24195000	23911000	22263000	32362000	36176000	30544000	30517000	22599000	20493000	29240000	21692000	13615000	13533000	37031000	17077000
Q14152;F5H335	Eukaryotic translation initiation factor 3 subunit A	EIF3A	>sp|Q14152|EIF3A_HUMAN Eukaryotic translation initiation factor 3 subunit A OS=Homo sapiens GN=EIF3A PE=1 SV=1;>tr|F5H335|F5H335_HUMAN Eukaryotic translation initiation factor 3 subunit A OS=Homo sapiens GN=EIF3A PE=2 SV=1	252270000	296480000	338120000	345970000	283800000	279100000	270700000	279050000	290830000	333750000	299480000	307290000	332560000	339930000	357370000	337430000	302810000	286750000	250970000	238440000	338720000	319610000	257640000	269750000
Q14157-5;Q14157;F8W726;Q14157-3;Q14157-1;Q14157-4;Q5VU77;H7C2T8;H0Y5H6;Q5VU78;Q5VU79;Q5VU80;Q5VU81	Ubiquitin-associated protein 2-like	UBAP2L	>sp|Q14157-5|UBP2L_HUMAN Isoform 5 of Ubiquitin-associated protein 2-like OS=Homo sapiens GN=UBAP2L;>sp|Q14157|UBP2L_HUMAN Ubiquitin-associated protein 2-like OS=Homo sapiens GN=UBAP2L PE=1 SV=2;>tr|F8W726|F8W726_HUMAN Ubiquitin-associated protein 2-like O	4348400	1	1	2743300	3531900	3844700	2067600	1	1	1	1	1	25001000	24243000	1	2523100	1	1	1	1	1	1	1	1
Q14203;Q14203-6;E7EX90;Q14203-4;Q14203-3;Q14203-2;Q14203-5;Q6AWB1;E7EWF7	Dynactin subunit 1	DCTN1;DKFZp686E0752	>sp|Q14203|DCTN1_HUMAN Dynactin subunit 1 OS=Homo sapiens GN=DCTN1 PE=1 SV=3;>sp|Q14203-6|DCTN1_HUMAN Isoform 6 of Dynactin subunit 1 OS=Homo sapiens GN=DCTN1;>tr|E7EX90|E7EX90_HUMAN Dynactin subunit 1 OS=Homo sapiens GN=DCTN1 PE=2 SV=1;>sp|Q14203-4|DCTN1_	8088900	6072500	12350000	11066000	18750000	17913000	15439000	13894000	16688000	18713000	15903000	15046000	9142600	12435000	12789000	13799000	14207000	13575000	12393000	12125000	14856000	21239000	11681000	12892000
Q14204	Cytoplasmic dynein 1 heavy chain 1	DYNC1H1	>sp|Q14204|DYHC1_HUMAN Cytoplasmic dynein 1 heavy chain 1 OS=Homo sapiens GN=DYNC1H1 PE=1 SV=5	1761800	1	3079200	2601200	10430000	15585000	3812300	1	1	3213000	2739100	2939600	1	1	1	1	1	1	1	1	1	2779100	1	1
Q14244-6;Q14244-7;Q14244;Q14244-4;Q14244-2;Q14244-3;Q14244-5	Ensconsin	MAP7	>sp|Q14244-6|MAP7_HUMAN Isoform 6 of Ensconsin OS=Homo sapiens GN=MAP7;>sp|Q14244-7|MAP7_HUMAN Isoform 7 of Ensconsin OS=Homo sapiens GN=MAP7;>sp|Q14244|MAP7_HUMAN Ensconsin OS=Homo sapiens GN=MAP7 PE=1 SV=1;>sp|Q14244-4|MAP7_HUMAN Isoform 4 of Ensconsin O	299900000	311930000	332440000	303110000	456130000	350880000	325380000	219810000	977050000	1210000000	518350000	328230000	799070000	719720000	271710000	294170000	790100000	877850000	1484200000	3413800000	488420000	628030000	1834800000	580790000
Q14247-2;Q14247;Q14247-3;H7C314;B4E358;E9PP90;E9PKG3;H0YCD9	Src substrate cortactin	CTTN	>sp|Q14247-2|SRC8_HUMAN Isoform 2 of Src substrate cortactin OS=Homo sapiens GN=CTTN;>sp|Q14247|SRC8_HUMAN Src substrate cortactin OS=Homo sapiens GN=CTTN PE=1 SV=2;>sp|Q14247-3|SRC8_HUMAN Isoform 3 of Src substrate cortactin OS=Homo sapiens GN=CTTN;>tr|H7	2436300	11238000	15340000	25961000	13204000	23343000	9122400	8142900	10995000	13612000	7045400	15812000	9208300	22491000	7962500	10439000	15264000	11026000	6115900	4266400	6728800	11854000	8458900	6082700
Q14315;Q14315-2	Filamin-C	FLNC	>sp|Q14315|FLNC_HUMAN Filamin-C OS=Homo sapiens GN=FLNC PE=1 SV=3;>sp|Q14315-2|FLNC_HUMAN Isoform 2 of Filamin-C OS=Homo sapiens GN=FLNC	3314800	3077000	4603200	4167000	93780000	123650000	6204600	4353300	16589000	5536100	6380200	4351500	3716800	5066800	4787600	5325100	2551200	1201300	3570500	3504700	6823600	6161200	4990700	3508700
Q14444;Q14444-2;G3V153;E9PLA9;E9PP31	Caprin-1	CAPRIN1	>sp|Q14444|CAPR1_HUMAN Caprin-1 OS=Homo sapiens GN=CAPRIN1 PE=1 SV=2;>sp|Q14444-2|CAPR1_HUMAN Isoform 2 of Caprin-1 OS=Homo sapiens GN=CAPRIN1;>tr|G3V153|G3V153_HUMAN Caprin-1 OS=Homo sapiens GN=CAPRIN1 PE=2 SV=1;>tr|E9PLA9|E9PLA9_HUMAN Caprin-1 (Fragment)	10745000	18251000	9712600	12483000	17783000	25434000	9830800	9842100	10998000	9645500	8423600	8852800	13332000	17506000	11467000	12166000	10238000	6858600	10404000	8624200	9021500	11503000	8933800	8701200
Q14498;Q14498-2;Q14498-3;G3XAC6;E1P5S2;H0Y4X3;Q5QP23;Q5QP21;Q86U06;Q86U06-2;Q86U06-5;Q86U06-4;G3XAP0;H0YJJ3;Q5QP22;G3V5Z6;Q86U06-3;G3V546;A8MYG5;H0Y6I9;F2Z2Z5;F8WF24	RNA-binding protein 39	RBM39	>sp|Q14498|RBM39_HUMAN RNA-binding protein 39 OS=Homo sapiens GN=RBM39 PE=1 SV=2;>sp|Q14498-2|RBM39_HUMAN Isoform 2 of RNA-binding protein 39 OS=Homo sapiens GN=RBM39;>sp|Q14498-3|RBM39_HUMAN Isoform 3 of RNA-binding protein 39 OS=Homo sapiens GN=RBM39;>tr	38099000	37351000	73085000	56596000	84153000	85783000	95984000	81618000	86470000	83313000	79023000	84725000	75357000	72893000	85696000	86954000	88089000	90935000	94760000	91462000	95296000	98762000	107980000	106040000
Q14681	BTB/POZ domain-containing protein KCTD2	KCTD2	>sp|Q14681|KCTD2_HUMAN BTB/POZ domain-containing protein KCTD2 OS=Homo sapiens GN=KCTD2 PE=1 SV=3	15980000	17593000	24281000	27463000	5206400	4580800	57198000	59121000	46612000	48608000	43333000	40378000	16407000	16040000	30910000	27698000	31907000	29965000	36222000	40161000	66664000	62311000	28067000	26989000
Q14692	Ribosome biogenesis protein BMS1 homolog	BMS1	>sp|Q14692|BMS1_HUMAN Ribosome biogenesis protein BMS1 homolog OS=Homo sapiens GN=BMS1 PE=1 SV=1	14504000	12238000	17168000	14624000	12865000	13200000	18997000	17741000	24479000	25862000	21569000	19069000	19976000	12966000	18874000	22693000	22058000	18477000	18401000	18675000	28240000	30261000	20974000	23280000
Q14764;H3BQK6;H3BRL2;H3BNF6;H3BUK7;H3BP76;H3BQE7;H3BUP3;H3BNF2;H3BPZ2	Major vault protein	MVP	>sp|Q14764|MVP_HUMAN Major vault protein OS=Homo sapiens GN=MVP PE=1 SV=4	73797000	92379000	128400000	111500000	82103000	83993000	190660000	168360000	193550000	188930000	169700000	172990000	103260000	85961000	104430000	112710000	104080000	95660000	177980000	184180000	315800000	296160000	151250000	138210000
Q14964;P20340;P20340-2;Q9NRW1;H0YGL6;B7Z337;P20340-4;H7BYW1;J3KR73;C9JU14;C9JB90	Ras-related protein Rab-39A;Ras-related protein Rab-6A;Ras-related protein Rab-6B	RAB39A;RAB6A;RAB6B	>sp|Q14964|RB39A_HUMAN Ras-related protein Rab-39A OS=Homo sapiens GN=RAB39A PE=2 SV=2;>sp|P20340|RAB6A_HUMAN Ras-related protein Rab-6A OS=Homo sapiens GN=RAB6A PE=1 SV=3;>sp|P20340-2|RAB6A_HUMAN Isoform 2 of Ras-related protein Rab-6A OS=Homo sapiens GN=	1	9771300	1	13081000	1	1	1	1	1	1	1	1	1	1	1	1	1	1	1	1	1	1	1	1
Q14974;J3QR48	Importin subunit beta-1	KPNB1	>sp|Q14974|IMB1_HUMAN Importin subunit beta-1 OS=Homo sapiens GN=KPNB1 PE=1 SV=2;>tr|J3QR48|J3QR48_HUMAN Importin subunit beta-1 (Fragment) OS=Homo sapiens GN=KPNB1 PE=2 SV=1	221510000	108970000	249180000	132710000	127160000	312100000	214910000	171420000	195760000	43929000	115710000	61386000	59104000	62147000	79062000	102390000	73015000	79188000	146210000	219380000	176730000	201870000	147530000	178580000
Q15046-2;Q15046;H3BVA8;H3BPV7;J3KRL2	Lysine--tRNA ligase	KARS	>sp|Q15046-2|SYK_HUMAN Isoform Mitochondrial of Lysine--tRNA ligase OS=Homo sapiens GN=KARS;>sp|Q15046|SYK_HUMAN Lysine--tRNA ligase OS=Homo sapiens GN=KARS PE=1 SV=3	10931000	22243000	18267000	15278000	34916000	25441000	8543800	6140000	7513500	5454000	7346200	7808500	17648000	10364000	6429400	8328500	11261000	8602800	7440500	9647800	8418800	8730900	5555300	7437400
Q15057;H7C3Q8;H7C1E0;Q96P50;Q96P50-1;Q96P50-4	Arf-GAP with coiled-coil, ANK repeat and PH domain-containing protein 2	ACAP2	>sp|Q15057|ACAP2_HUMAN Arf-GAP with coiled-coil, ANK repeat and PH domain-containing protein 2 OS=Homo sapiens GN=ACAP2 PE=1 SV=3	128360000	142650000	240510000	265710000	193450000	205800000	249310000	278940000	271330000	303530000	259910000	262540000	199040000	208120000	247240000	275350000	266500000	244800000	250310000	244630000	278040000	292060000	267080000	254740000
Q15149;Q15149-2;Q15149-3;Q15149-6;Q15149-4;Q15149-5;Q15149-9;Q15149-8;Q15149-7;E9PMV1;H0YDN1;P58107;E9PPU0;E9PKG0;E9PQ28	Plectin	PLEC	>sp|Q15149|PLEC_HUMAN Plectin OS=Homo sapiens GN=PLEC PE=1 SV=3;>sp|Q15149-2|PLEC_HUMAN Isoform 2 of Plectin OS=Homo sapiens GN=PLEC;>sp|Q15149-3|PLEC_HUMAN Isoform 3 of Plectin OS=Homo sapiens GN=PLEC;>sp|Q15149-6|PLEC_HUMAN Isoform 6 of Plectin OS=Homo s	229880000	215910000	169730000	146420000	842460000	824430000	118260000	122540000	112160000	129430000	86412000	109200000	166060000	122410000	120210000	135780000	132400000	119390000	110680000	89522000	146960000	109270000	70639000	126560000
Q15181	Inorganic pyrophosphatase	PPA1	>sp|Q15181|IPYR_HUMAN Inorganic pyrophosphatase OS=Homo sapiens GN=PPA1 PE=1 SV=2	9026100	1	4494600	1	1	1	1	1	1	1	1	1	2912500	1	1	1	1	1	1	1	1	1	1	1
Q15208	Serine/threonine-protein kinase 38	STK38	>sp|Q15208|STK38_HUMAN Serine/threonine-protein kinase 38 OS=Homo sapiens GN=STK38 PE=1 SV=1	655220000	750400000	820430000	846700000	508830000	448540000	1163900000	1218600000	1147400000	1089200000	1113000000	1111500000	649960000	651320000	913150000	897310000	1000900000	984350000	1537800000	1630000000	951940000	1020500000	893270000	902680000
Q15233;Q15233-2;C9JYS8;H7C367;C9IZL7;C9J4X2	Non-POU domain-containing octamer-binding protein	NONO	>sp|Q15233|NONO_HUMAN Non-POU domain-containing octamer-binding protein OS=Homo sapiens GN=NONO PE=1 SV=4;>sp|Q15233-2|NONO_HUMAN Isoform 2 of Non-POU domain-containing octamer-binding protein OS=Homo sapiens GN=NONO;>tr|C9JYS8|C9JYS8_HUMAN Non-POU domain-	32025000	30700000	39102000	40350000	29307000	30489000	44338000	51465000	45857000	79953000	48439000	55574000	73826000	68607000	45561000	52697000	46291000	44472000	47796000	53767000	74234000	64669000	76154000	52341000
Q15293;B7Z1M1	Reticulocalbin-1	RCN1	>sp|Q15293|RCN1_HUMAN Reticulocalbin-1 OS=Homo sapiens GN=RCN1 PE=1 SV=1;>tr|B7Z1M1|B7Z1M1_HUMAN Reticulocalbin-1 OS=Homo sapiens GN=RCN1 PE=2 SV=1	1	1	1	1	1	5949100	1	1	1	1	1	1	1	1	1	1	1	1	1	1	1	1	1	1
Q15365;F8VTZ0	Poly(rC)-binding protein 1	PCBP1	>sp|Q15365|PCBP1_HUMAN Poly(rC)-binding protein 1 OS=Homo sapiens GN=PCBP1 PE=1 SV=2	17517000	6071800	20172000	13612000	26781000	23261000	7766600	6696400	4354100	7781500	3070100	6107200	4241400	6451000	3648700	4176400	1369100	1	8557800	13573000	9650100	7524600	7656500	6503100
Q15366-2;Q15366;Q15366-3;Q15366-6;Q15366-5;Q15366-4;B4DXP5;F8VZX2;G3V0E8;H3BRU6;B4DLC0;F8W1G6;F8W0G4;F8VXH9;P57721;P57721-4;E9PFP8;P57721-5;P57721-3;P57721-2;J3QT27;H3BND9;P57723;P57723-2;C9J0A4;H3BSS4;C9JZY3;C9JTY5;C9J5V4;C9JSA6;C9J7A9;C9IZV9;F8WC71;C9K0A2;H3BSP4	Poly(rC)-binding protein 2;Poly(rC)-binding protein 3	PCBP2;PCBP3	>sp|Q15366-2|PCBP2_HUMAN Isoform 2 of Poly(rC)-binding protein 2 OS=Homo sapiens GN=PCBP2;>sp|Q15366|PCBP2_HUMAN Poly(rC)-binding protein 2 OS=Homo sapiens GN=PCBP2 PE=1 SV=1;>sp|Q15366-3|PCBP2_HUMAN Isoform 3 of Poly(rC)-binding protein 2 OS=Homo sapiens	17910000	24003000	11519000	15417000	12123000	10667000	5444100	5723500	6687000	10177000	4345800	6824900	8299500	12360000	5844800	4300500	6046600	2786700	6480100	1	7136400	6193900	1	1
Q15388	Mitochondrial import receptor subunit TOM20 homolog	TOMM20	>sp|Q15388|TOM20_HUMAN Mitochondrial import receptor subunit TOM20 homolog OS=Homo sapiens GN=TOMM20 PE=1 SV=1	1	7489300	6808300	7577100	3691400	1	1	1	7965800	6479000	1	1	1	13640000	1	8203100	1	1	1	1	6451200	6465400	7941900	1
Q15393;Q15393-3;Q15393-2;I3L4G7;J3QL37;J3QRB2;J3QKV4;H3BMB0	Splicing factor 3B subunit 3	SF3B3	>sp|Q15393|SF3B3_HUMAN Splicing factor 3B subunit 3 OS=Homo sapiens GN=SF3B3 PE=1 SV=4	337940000	361230000	564800000	557240000	404670000	430400000	666770000	682370000	604820000	556610000	636000000	597710000	466380000	445520000	554670000	551510000	410900000	433650000	575050000	578770000	728040000	653140000	476750000	531320000
Q15417;F8WA86;B4DUT8;Q99439;B4DDF4;B4DFK6;Q99439-2;E9PDU6;K7ES69	Calponin-3;Calponin-2	CNN3;CNN2	>sp|Q15417|CNN3_HUMAN Calponin-3 OS=Homo sapiens GN=CNN3 PE=1 SV=1;>tr|F8WA86|F8WA86_HUMAN Calponin-3 OS=Homo sapiens GN=CNN3 PE=2 SV=1;>tr|B4DUT8|B4DUT8_HUMAN Calponin-2 OS=Homo sapiens GN=CNN2 PE=2 SV=1;>sp|Q99439|CNN2_HUMAN Calponin-2 OS=Homo sapiens GN	2212100	1	8082800	3123800	3474000	4879200	2363200	3461100	2753200	5954600	5735500	6119000	2918200	9019900	8405400	2241800	3218500	2449000	12765000	1	2050200	1651600	19734000	12799000
Q15427;Q5SZ64	Splicing factor 3B subunit 4	SF3B4	>sp|Q15427|SF3B4_HUMAN Splicing factor 3B subunit 4 OS=Homo sapiens GN=SF3B4 PE=1 SV=1;>tr|Q5SZ64|Q5SZ64_HUMAN Splicing factor 3B subunit 4 (Fragment) OS=Homo sapiens GN=SF3B4 PE=2 SV=1	9211000	9991600	20099000	20463000	22377000	17879000	31060000	28860000	26817000	32904000	29815000	29822000	23331000	19604000	24700000	26927000	26493000	29092000	26549000	32688000	31912000	28102000	26826000	24350000
Q15428;K7EKV8;K7EMT0;K7EP23	Splicing factor 3A subunit 2	SF3A2	>sp|Q15428|SF3A2_HUMAN Splicing factor 3A subunit 2 OS=Homo sapiens GN=SF3A2 PE=1 SV=2;>tr|K7EKV8|K7EKV8_HUMAN Splicing factor 3A subunit 2 OS=Homo sapiens GN=SF3A2 PE=2 SV=1;>tr|K7EMT0|K7EMT0_HUMAN Splicing factor 3A subunit 2 (Fragment) OS=Homo sapiens G	13535000	6466000	14930000	16260000	1225400	3038800	6325500	20767000	19110000	22404000	17446000	21163000	14669000	12729000	13094000	16035000	13602000	7208600	14912000	15364000	14479000	15884000	10362000	10189000
Q15459;E9PAW1;H7C1L2;F8WB66;F8WC79	Splicing factor 3A subunit 1	SF3A1	>sp|Q15459|SF3A1_HUMAN Splicing factor 3A subunit 1 OS=Homo sapiens GN=SF3A1 PE=1 SV=1;>tr|E9PAW1|E9PAW1_HUMAN Splicing factor 3A subunit 1 OS=Homo sapiens GN=SF3A1 PE=2 SV=1	42442000	82421000	36752000	39811000	24863000	20522000	35672000	37903000	107920000	135230000	78427000	81124000	76756000	73577000	65652000	59138000	85285000	66665000	198040000	173330000	75157000	62851000	116000000	113540000
Q15750;Q15750-2	TGF-beta-activated kinase 1 and MAP3K7-binding protein 1	TAB1	>sp|Q15750|TAB1_HUMAN TGF-beta-activated kinase 1 and MAP3K7-binding protein 1 OS=Homo sapiens GN=TAB1 PE=1 SV=1;>sp|Q15750-2|TAB1_HUMAN Isoform 2 of TGF-beta-activated kinase 1 and MAP3K7-binding protein 1 OS=Homo sapiens GN=TAB1	94529000	98749000	111920000	97849000	75357000	63538000	108890000	112430000	119730000	135810000	111750000	124260000	91964000	71481000	89484000	85152000	83112000	81086000	84824000	103640000	117180000	118460000	96192000	101450000
Q15907;P62491;H3BSC1;B4DMK0;H3BMH2;J3KQP6;P62491-2;B4DQU5	Ras-related protein Rab-11B;Ras-related protein Rab-11A	RAB11B;RAB11A	>sp|Q15907|RB11B_HUMAN Ras-related protein Rab-11B OS=Homo sapiens GN=RAB11B PE=1 SV=4;>sp|P62491|RB11A_HUMAN Ras-related protein Rab-11A OS=Homo sapiens GN=RAB11A PE=1 SV=3;>tr|H3BSC1|H3BSC1_HUMAN Ras-related protein Rab-11A OS=Homo sapiens GN=RAB11A PE=2	75050000	1	85778000	35756000	1	64260000	40138000	42719000	39207000	58024000	51573000	60671000	35045000	33968000	31736000	37325000	35366000	44501000	72666000	41765000	45929000	54672000	37314000	31138000
Q15942;H0Y2Y8;B4DQR8;B4DQX7;H7C3D3;C9JJK5;H7C3R3;C9IZ41	Zyxin	ZYX	>sp|Q15942|ZYX_HUMAN Zyxin OS=Homo sapiens GN=ZYX PE=1 SV=1;>tr|H0Y2Y8|H0Y2Y8_HUMAN Zyxin (Fragment) OS=Homo sapiens GN=ZYX PE=2 SV=1;>tr|B4DQR8|B4DQR8_HUMAN Zyxin OS=Homo sapiens GN=ZYX PE=2 SV=1;>tr|B4DQX7|B4DQX7_HUMAN Zyxin OS=Homo sapiens GN=ZYX PE=2 S	749920	1	1365500	1097300	71947000	63787000	975300	450280	220980	1301000	1053500	690030	1018600	803110	465880	943660	149660	821180	488800	1	1331900	1334500	1	1
Q16543;K7EKQ2;K7EQA9;K7EL68	Hsp90 co-chaperone Cdc37	CDC37	>sp|Q16543|CDC37_HUMAN Hsp90 co-chaperone Cdc37 OS=Homo sapiens GN=CDC37 PE=1 SV=1;>tr|K7EKQ2|K7EKQ2_HUMAN Hsp90 co-chaperone Cdc37 (Fragment) OS=Homo sapiens GN=CDC37 PE=2 SV=1;>tr|K7EQA9|K7EQA9_HUMAN Hsp90 co-chaperone Cdc37 (Fragment) OS=Homo sapiens GN	3938200	2228900	7015000	6303500	3843500	3449500	3825300	4918600	2495400	6241100	2378600	3552200	4510700	4262100	5577200	3906600	2874500	3008500	4352000	3860500	5553200	3359300	2843000	2965900
Q16629;C9JAB2;Q16629-4;Q16629-2;Q16629-3	Serine/arginine-rich splicing factor 7	SRSF7	>sp|Q16629|SRSF7_HUMAN Serine/arginine-rich splicing factor 7 OS=Homo sapiens GN=SRSF7 PE=1 SV=1;>tr|C9JAB2|C9JAB2_HUMAN Serine/arginine-rich-splicing factor 7 OS=Homo sapiens GN=SRSF7 PE=2 SV=1;>sp|Q16629-4|SRSF7_HUMAN Isoform 4 of Serine/arginine-rich sp	42796000	25045000	5815700	10044000	3452000	28545000	3254200	14569000	8358600	8099100	8989100	10516000	8365800	33228000	4879300	14232000	13833000	15525000	3295500	18180000	2927300	13689000	18666000	15864000
Q16630-2;Q16630;F8WJN3;Q16630-3;F8W084	Cleavage and polyadenylation specificity factor subunit 6	CPSF6	>sp|Q16630-2|CPSF6_HUMAN Isoform 2 of Cleavage and polyadenylation specificity factor subunit 6 OS=Homo sapiens GN=CPSF6;>sp|Q16630|CPSF6_HUMAN Cleavage and polyadenylation specificity factor subunit 6 OS=Homo sapiens GN=CPSF6 PE=1 SV=2;>tr|F8WJN3|F8WJN3_H	36158000	22226000	40143000	41380000	41904000	34526000	50630000	55960000	53459000	49696000	44228000	43747000	25501000	24735000	70077000	60784000	50244000	49276000	39045000	56224000	51998000	57669000	49466000	48275000
Q16658;J3KNT0;H7BYX5;C9JFC0;C9JPH9	Fascin	FSCN1	>sp|Q16658|FSCN1_HUMAN Fascin OS=Homo sapiens GN=FSCN1 PE=1 SV=3;>tr|J3KNT0|J3KNT0_HUMAN Fascin OS=Homo sapiens GN=FSCN1 PE=2 SV=1	23386000	15576000	8752800	8940600	6204900	5337500	1	1	1	1	1	1	8686900	3505400	1	1	1	1	1	1	1	1	1	1
Q32MZ4;Q32MZ4-2;Q32MZ4-3;Q9Y608;Q32MZ4-4;A8MXR0;Q9Y608-4;Q9Y608-2;C9JSU1	Leucine-rich repeat flightless-interacting protein 1;Leucine-rich repeat flightless-interacting protein 2	LRRFIP1;LRRFIP2	>sp|Q32MZ4|LRRF1_HUMAN Leucine-rich repeat flightless-interacting protein 1 OS=Homo sapiens GN=LRRFIP1 PE=1 SV=2;>sp|Q32MZ4-2|LRRF1_HUMAN Isoform 2 of Leucine-rich repeat flightless-interacting protein 1 OS=Homo sapiens GN=LRRFIP1;>sp|Q32MZ4-3|LRRF1_HUMAN	1912600	1	6170000	5078100	6107200	5487200	6320300	5501400	5809000	6535300	1	1	4768600	4508400	8185600	7344700	6900600	5230500	9977400	8590000	9118900	8308400	6076000	6312100
Q32Q12;P22392-2;J3KPD9;P15531-2;P15531;P22392;E7ERL0;E5RHP0;O60361;F6XY72;C9K028	Nucleoside diphosphate kinase;Nucleoside diphosphate kinase A;Nucleoside diphosphate kinase B	NME1-NME2;NME1;NME2	>tr|Q32Q12|Q32Q12_HUMAN Nucleoside diphosphate kinase OS=Homo sapiens GN=NME1-NME2 PE=2 SV=1;>sp|P22392-2|NDKB_HUMAN Isoform 3 of Nucleoside diphosphate kinase B OS=Homo sapiens GN=NME2;>tr|J3KPD9|J3KPD9_HUMAN Nucleoside diphosphate kinase B OS=Homo sapien	168910000	190960000	140560000	112370000	88790000	70854000	46041000	33823000	40742000	23540000	20230000	18549000	77554000	74745000	28516000	30516000	22558000	21321000	46233000	50280000	28682000	42317000	43476000	30439000
Q3SYB4;Q96P63	Serpin B12	SERPINB12	>tr|Q3SYB4|Q3SYB4_HUMAN SERPINB12 protein OS=Homo sapiens GN=SERPINB12 PE=2 SV=1;>sp|Q96P63|SPB12_HUMAN Serpin B12 OS=Homo sapiens GN=SERPINB12 PE=1 SV=1	6074400	5369400	3154000	10220000	4324200	14243000	1125300	1781300	3802900	4325300	1	1	2815000	1485900	1	1	1	1	1	1	4275600	1	9363900	5279500
Q3ZCM7;Q5SQY0;F5H0I4	Tubulin beta-8 chain	TUBB8;RP11-631M21.2	>sp|Q3ZCM7|TBB8_HUMAN Tubulin beta-8 chain OS=Homo sapiens GN=TUBB8 PE=1 SV=2;>tr|Q5SQY0|Q5SQY0_HUMAN Tubulin beta-8 chain OS=Homo sapiens GN=TUBB8 PE=3 SV=1;>tr|F5H0I4|F5H0I4_HUMAN Tubulin beta-8 chain OS=Homo sapiens GN=TUBB8 PE=3 SV=1	1	1	1	1	1	1	14396000	22355000	1	19874000	21598000	20097000	1	1	16835000	18831000	42028000	1	1	1	1	1	20925000	1
Q562R1	Beta-actin-like protein 2	ACTBL2	>sp|Q562R1|ACTBL_HUMAN Beta-actin-like protein 2 OS=Homo sapiens GN=ACTBL2 PE=1 SV=2	10505000	1	1	16111000	3176700	261520000	3645700	1	1	1	1	7715900	3223400	2833000	6691500	4961900	1	8475000	1	9974300	7113000	7600600	1	1
Q58FF8	Putative heat shock protein HSP 90-beta 2	HSP90AB2P	>sp|Q58FF8|H90B2_HUMAN Putative heat shock protein HSP 90-beta 2 OS=Homo sapiens GN=HSP90AB2P PE=1 SV=2	24815000	43465000	36582000	34855000	48210000	31373000	3394300	4902400	7617100	5326100	3312600	3068000	21404000	17713000	5754200	4317900	2963900	3326200	3547100	2470900	5244300	5663600	2648400	3713100
Q5BKY9;G3XAI9;Q8N9E0;Q5BKY9-2	Protein FAM133B;Protein FAM133A	FAM133B;FAM133A	>sp|Q5BKY9|F133B_HUMAN Protein FAM133B OS=Homo sapiens GN=FAM133B PE=1 SV=1;>tr|G3XAI9|G3XAI9_HUMAN Protein FAM133B OS=Homo sapiens GN=FAM133B PE=2 SV=1;>sp|Q8N9E0|F133A_HUMAN Protein FAM133A OS=Homo sapiens GN=FAM133A PE=2 SV=1;>sp|Q5BKY9-2|F133B_HUMAN Is	85402000	82971000	37324000	36717000	17602000	18654000	33917000	34087000	35214000	42054000	34527000	33259000	21609000	19598000	26788000	89451000	14992000	10922000	67589000	61724000	38474000	55667000	61712000	59436000
Q5JSZ5;Q5JSZ5-5;Q9Y520-7;Q9Y520;Q9Y520-5;E7EPN9;Q9Y520-4;Q9Y520-6;Q9Y520-3;P48634;P48634-3;P48634-2;P48634-4	Protein PRRC2B;Protein PRRC2C;Protein PRRC2A	PRRC2B;PRRC2C;PRRC2A	>sp|Q5JSZ5|PRC2B_HUMAN Protein PRRC2B OS=Homo sapiens GN=PRRC2B PE=1 SV=2;>sp|Q5JSZ5-5|PRC2B_HUMAN Isoform 1 of Protein PRRC2B OS=Homo sapiens GN=PRRC2B;>sp|Q9Y520-7|PRC2C_HUMAN Isoform 7 of Protein PRRC2C OS=Homo sapiens GN=PRRC2C;>sp|Q9Y520|PRC2C_HUMAN P	524490	507230	1859300	1923500	1744500	2088800	1788200	2181000	1693000	1	2679500	2429300	2199400	1943500	2050600	2111700	2035600	1825300	1896400	1730300	1915200	2405300	1929400	1688500
Q5JXB2;F8VQQ8	Putative ubiquitin-conjugating enzyme E2 N-like	UBE2NL;UBE2N	>sp|Q5JXB2|UE2NL_HUMAN Putative ubiquitin-conjugating enzyme E2 N-like OS=Homo sapiens GN=UBE2NL PE=1 SV=1;>tr|F8VQQ8|F8VQQ8_HUMAN Ubiquitin-conjugating enzyme E2 N OS=Homo sapiens GN=UBE2N PE=2 SV=1	1713900	6861000	2440900	5088700	10307000	10178000	49166000	25055000	8293800	6992500	41324000	40090000	1	7162700	46798000	34354000	26758000	34051000	13352000	29729000	6248400	37594000	42322000	6694300
Q5M9N0;Q5M9N0-2;Q5M9N0-3	Coiled-coil domain-containing protein 158	CCDC158	>sp|Q5M9N0|CD158_HUMAN Coiled-coil domain-containing protein 158 OS=Homo sapiens GN=CCDC158 PE=1 SV=2;>sp|Q5M9N0-2|CD158_HUMAN Isoform 2 of Coiled-coil domain-containing protein 158 OS=Homo sapiens GN=CCDC158;>sp|Q5M9N0-3|CD158_HUMAN Isoform 3 of Coiled-co	1	1	18127000	14976000	14403000	1	1	1	1	1	9501000	1	1	1	1	9187100	5036700	1	10787000	9030900	6416600	1	19012000	22336000
Q5SWX8;Q5SWX8-4;Q5SWX8-3;Q5SWX8-2	Protein odr-4 homolog	ODR4	>sp|Q5SWX8|ODR4_HUMAN Protein odr-4 homolog OS=Homo sapiens GN=ODR4 PE=2 SV=1;>sp|Q5SWX8-4|ODR4_HUMAN Isoform 4 of Protein odr-4 homolog OS=Homo sapiens GN=ODR4;>sp|Q5SWX8-3|ODR4_HUMAN Isoform 3 of Protein odr-4 homolog OS=Homo sapiens GN=ODR4;>sp|Q5SWX8-2	10900000	10943000	16176000	16016000	9748800	10793000	19212000	15313000	20173000	14989000	17499000	16591000	14851000	9696900	18900000	15939000	16281000	13978000	19753000	24789000	20091000	17868000	21233000	18808000
Q5T6N4;O14639;O14639-2;Q5JVV3;O14639-5;O14639-3;O14639-4;F8W8M4;Q5T6N2;J3QSX6;H0Y3K7;F6XFR5;H0Y7N6	Actin-binding LIM protein 1	ABLIM1	>tr|Q5T6N4|Q5T6N4_HUMAN Actin-binding LIM protein 1 OS=Homo sapiens GN=ABLIM1 PE=4 SV=1;>sp|O14639|ABLM1_HUMAN Actin-binding LIM protein 1 OS=Homo sapiens GN=ABLIM1 PE=1 SV=3;>sp|O14639-2|ABLM1_HUMAN Isoform 2 of Actin-binding LIM protein 1 OS=Homo sapiens	1	5582000	9953200	6259500	8493400	7487900	6943800	7118300	6978300	3320300	7523400	11222000	9375600	5538800	8689500	5895800	6488600	6907300	4806100	4719600	6564800	9880300	5176300	6488800
Q5T749	Keratinocyte proline-rich protein	KPRP	>sp|Q5T749|KPRP_HUMAN Keratinocyte proline-rich protein OS=Homo sapiens GN=KPRP PE=1 SV=1	26663000	31780000	39189000	29963000	44018000	52237000	17463000	10564000	17110000	20846000	28325000	25653000	13543000	22714000	10701000	17604000	26775000	29515000	34599000	35314000	22082000	16761000	72110000	70108000
Q5VWC4;P55036;P55036-2;A6PVX3;H0Y3Y9;A2A3N6;H0Y561	26S proteasome non-ATPase regulatory subunit 4	PSMD4	>tr|Q5VWC4|Q5VWC4_HUMAN 26S proteasome non-ATPase regulatory subunit 4 OS=Homo sapiens GN=PSMD4 PE=2 SV=1;>sp|P55036|PSMD4_HUMAN 26S proteasome non-ATPase regulatory subunit 4 OS=Homo sapiens GN=PSMD4 PE=1 SV=1;>sp|P55036-2|PSMD4_HUMAN Isoform Rpn10E of 26	15962000	19861000	30119000	31464000	42083000	44748000	37901000	50255000	22533000	31714000	35097000	41515000	30962000	29872000	46334000	40641000	17207000	19303000	38251000	22456000	42922000	52314000	27435000	30125000
Q5VX20;Q16875;Q16875-2;Q5W015;F2Z2I2;B7Z955;Q16875-3;H0Y483;F5H5L1;Q16877;Q66S35;B7Z5C3;Q64EX5;Q5XLC2;Q4VBA9;Q9H178	6-phosphofructo-2-kinase/fructose-2,6-bisphosphatase 3;6-phosphofructo-2-kinase;Fructose-2,6-bisphosphatase	PFKFB3	>tr|Q5VX20|Q5VX20_HUMAN 6-phosphofructo-2-kinase OS=Homo sapiens GN=PFKFB3 PE=2 SV=1;>sp|Q16875|F263_HUMAN 6-phosphofructo-2-kinase/fructose-2,6-bisphosphatase 3 OS=Homo sapiens GN=PFKFB3 PE=1 SV=1;>sp|Q16875-2|F263_HUMAN Isoform 2 of 6-phosphofructo-2-kin	19051000	45477000	67641000	55056000	37439000	41326000	82704000	75888000	78184000	73941000	72949000	82333000	50631000	52550000	72961000	76694000	58624000	72220000	65844000	86001000	115860000	110830000	81129000	74603000
Q5W0B1	RING finger protein 219	RNF219	>sp|Q5W0B1|RN219_HUMAN RING finger protein 219 OS=Homo sapiens GN=RNF219 PE=1 SV=1	28162000	35533000	31763000	33327000	17527000	20309000	32700000	27353000	37170000	31423000	25921000	27523000	28782000	31466000	27562000	33508000	29591000	26722000	23994000	32453000	23392000	25846000	27038000	30769000
Q5W0H4;P13693;E9PJF7;J3KPG2;Q56UQ5;Q8TBK7;H0YCX0	Translationally-controlled tumor protein;TPT1-like protein	TPT1	>tr|Q5W0H4|Q5W0H4_HUMAN Translationally-controlled tumor protein OS=Homo sapiens GN=TPT1 PE=1 SV=1;>sp|P13693|TCTP_HUMAN Translationally-controlled tumor protein OS=Homo sapiens GN=TPT1 PE=1 SV=1;>tr|E9PJF7|E9PJF7_HUMAN Translationally-controlled tumor pro	116760000	83936000	31211000	50319000	19301000	21474000	4162800	3183500	1929200	1428500	2425100	1	35391000	29876000	2814200	3746400	1	1	3097400	2893000	2511300	2450900	2887800	2864300
Q66PJ3;Q66PJ3-2;Q66PJ3-3;Q66PJ3-4;F8WCT1;B3V0L1;H7BZV4;F5GYV5;Q66PJ3-5;F8WEP2;F5H7X4	ADP-ribosylation factor-like protein 6-interacting protein 4	ARL6IP4	>sp|Q66PJ3|AR6P4_HUMAN ADP-ribosylation factor-like protein 6-interacting protein 4 OS=Homo sapiens GN=ARL6IP4 PE=1 SV=1;>sp|Q66PJ3-2|AR6P4_HUMAN Isoform 2 of ADP-ribosylation factor-like protein 6-interacting protein 4 OS=Homo sapiens GN=ARL6IP4;>sp|Q66PJ	23524000	28660000	34708000	31431000	18968000	19447000	12473000	13226000	15803000	17358000	16011000	12719000	4882400	1	6586100	1	6989200	5708200	13145000	18923000	23459000	23655000	18733000	20982000
Q6NY19;Q6NY19-2;O43147-2;O43147;O43147-5;REV__Q12769-2	KN motif and ankyrin repeat domain-containing protein 3;Small G protein signaling modulator 2	KANK3;SGSM2	>sp|Q6NY19|KANK3_HUMAN KN motif and ankyrin repeat domain-containing protein 3 OS=Homo sapiens GN=KANK3 PE=2 SV=1;>sp|Q6NY19-2|KANK3_HUMAN Isoform 2 of KN motif and ankyrin repeat domain-containing protein 3 OS=Homo sapiens GN=KANK3;>sp|O43147-2|SGSM2_HUMA	4414700	4868700	6698000	6038200	3020900	3979800	5206300	5591900	4828100	7856000	5064300	5314100	3929000	4293600	7238900	5998300	5298800	4860500	6143500	4696600	6363100	4877400	4453300	4030100
Q6NZI2;Q6NZI2-2;Q6NZI2-3	Polymerase I and transcript release factor	PTRF	>sp|Q6NZI2|PTRF_HUMAN Polymerase I and transcript release factor OS=Homo sapiens GN=PTRF PE=1 SV=1;>sp|Q6NZI2-2|PTRF_HUMAN Isoform 2 of Polymerase I and transcript release factor OS=Homo sapiens GN=PTRF;>sp|Q6NZI2-3|PTRF_HUMAN Isoform 3 of Polymerase I and	1969500	3330700	1	1	1	3106700	1	1	1	2639700	1	1	3999400	4144500	11861000	6537700	13317000	6345100	1	1	3122800	3379600	1	1
Q6P1L8	39S ribosomal protein L14, mitochondrial	MRPL14	>sp|Q6P1L8|RM14_HUMAN 39S ribosomal protein L14, mitochondrial OS=Homo sapiens GN=MRPL14 PE=1 SV=1	1	1	1	1	1	936340	1	1	1	1	1	1	1	1	1	1	1	1	1	1	1	1	1	1
Q6P2Q9;I3L0J9	Pre-mRNA-processing-splicing factor 8	PRPF8	>sp|Q6P2Q9|PRP8_HUMAN Pre-mRNA-processing-splicing factor 8 OS=Homo sapiens GN=PRPF8 PE=1 SV=2;>tr|I3L0J9|I3L0J9_HUMAN Pre-mRNA-processing-splicing factor 8 (Fragment) OS=Homo sapiens GN=PRPF8 PE=2 SV=1	1	1	4766600	5060600	5771100	1	1	1	1	9570900	1	1	1	1	1	1	1	1	1	1	1	1	1	4000500
Q6P3W7;F8VSC5;F8VPW3	SCY1-like protein 2	SCYL2	>sp|Q6P3W7|SCYL2_HUMAN SCY1-like protein 2 OS=Homo sapiens GN=SCYL2 PE=1 SV=1;>tr|F8VSC5|F8VSC5_HUMAN SCY1-like protein 2 (Fragment) OS=Homo sapiens GN=SCYL2 PE=2 SV=1	1	4064500	6130300	5618400	1	3071100	11162000	15175000	11888000	14935000	6064100	6726900	1	4415200	7970200	6534600	5615700	6100200	12603000	8982600	14524000	18732000	6881900	7133500
Q6PKG0;Q6PKG0-3;E5RH50;H0YBW1;H0YC73;H0YC33	La-related protein 1	LARP1	>sp|Q6PKG0|LARP1_HUMAN La-related protein 1 OS=Homo sapiens GN=LARP1 PE=1 SV=2;>sp|Q6PKG0-3|LARP1_HUMAN Isoform 2 of La-related protein 1 OS=Homo sapiens GN=LARP1;>tr|E5RH50|E5RH50_HUMAN La-related protein 1 (Fragment) OS=Homo sapiens GN=LARP1 PE=2 SV=1;>t	15028000	11998000	2604100	2301800	2753300	4332200	1	1	1	3508800	3738700	3595000	9442200	7997200	4347600	1	2144500	2286400	1	1614500	1	1	1	1
Q6UB35;H0Y327;Q6UB35-2;Q5JYA8;Q5JYA4;Q5JYA5;Q5JYA3;H0Y2S0;Q4VXM0;Q4VXM1	Monofunctional C1-tetrahydrofolate synthase, mitochondrial	MTHFD1L	>sp|Q6UB35|C1TM_HUMAN Monofunctional C1-tetrahydrofolate synthase, mitochondrial OS=Homo sapiens GN=MTHFD1L PE=1 SV=1	3969500	6086500	15504000	13793000	18914000	16540000	6900700	8294500	1	13068000	1	3647100	7720900	4057700	4181300	12788000	9264700	3503900	4674800	4994800	14805000	3385700	15183000	16434000
Q6ZRV2;J3KPS2	Protein FAM83H	FAM83H	>sp|Q6ZRV2|FA83H_HUMAN Protein FAM83H OS=Homo sapiens GN=FAM83H PE=1 SV=3;>tr|J3KPS2|J3KPS2_HUMAN Protein FAM83H (Fragment) OS=Homo sapiens GN=FAM83H PE=4 SV=1	1	1	1	1	7491600	6945700	1	1	1	1	1	1	1	1	1	1	1	1	1	1	1	1187500	1	1
Q71U36;Q71U36-2;Q13748;Q13748-2;Q6PEY2	Tubulin alpha-1A chain;Tubulin alpha-3C/D chain;Tubulin alpha-3E chain	TUBA1A;TUBA3C;TUBA3E	>sp|Q71U36|TBA1A_HUMAN Tubulin alpha-1A chain OS=Homo sapiens GN=TUBA1A PE=1 SV=1;>sp|Q71U36-2|TBA1A_HUMAN Isoform 2 of Tubulin alpha-1A chain OS=Homo sapiens GN=TUBA1A;>sp|Q13748|TBA3C_HUMAN Tubulin alpha-3C/D chain OS=Homo sapiens GN=TUBA3C PE=1 SV=3;>sp	15961000	14061000	15521000	8235100	37903000	36799000	8301300	7170500	7388600	1668800	3567000	1	5087200	5742100	12240000	9725600	7814200	6061500	6612300	1917400	7392300	7144800	6416400	7894700
Q7L014;D6RJA6;H0Y9U3	Probable ATP-dependent RNA helicase DDX46	DDX46	>sp|Q7L014|DDX46_HUMAN Probable ATP-dependent RNA helicase DDX46 OS=Homo sapiens GN=DDX46 PE=1 SV=2	27780000	13860000	58105000	40377000	54105000	53467000	38932000	43500000	40215000	52839000	37615000	40728000	34927000	40324000	38562000	35009000	34637000	39728000	38600000	38785000	43790000	41254000	46465000	49817000
Q7L2E3-2;Q7L2E3;H7BXY3;Q7L2E3-3	Putative ATP-dependent RNA helicase DHX30	DHX30	>sp|Q7L2E3-2|DHX30_HUMAN Isoform 2 of Putative ATP-dependent RNA helicase DHX30 OS=Homo sapiens GN=DHX30;>sp|Q7L2E3|DHX30_HUMAN Putative ATP-dependent RNA helicase DHX30 OS=Homo sapiens GN=DHX30 PE=1 SV=1;>tr|H7BXY3|H7BXY3_HUMAN Putative ATP-dependent RNA	7459300	1	4653900	5370300	6273400	7281100	4142300	1	4095700	4139300	3903000	5887600	6391800	4735500	5339100	4830300	4956300	6319700	3416400	4607400	1	3572200	1	1
Q7L2H7;B4E2Q4;H0YCQ8;J3KNJ2;E9PN86;E9PRY0;E7ESM3;E9PRI2	Eukaryotic translation initiation factor 3 subunit M	EIF3M	>sp|Q7L2H7|EIF3M_HUMAN Eukaryotic translation initiation factor 3 subunit M OS=Homo sapiens GN=EIF3M PE=1 SV=1;>tr|B4E2Q4|B4E2Q4_HUMAN Eukaryotic translation initiation factor 3 subunit M OS=Homo sapiens GN=EIF3M PE=2 SV=1	102170000	99472000	101740000	115190000	94783000	84883000	16818000	17228000	28336000	23201000	17306000	19824000	59863000	56131000	34451000	33800000	24268000	20962000	47267000	30546000	24479000	32043000	39671000	37761000
Q7RTV0	PHD finger-like domain-containing protein 5A	PHF5A	>sp|Q7RTV0|PHF5A_HUMAN PHD finger-like domain-containing protein 5A OS=Homo sapiens GN=PHF5A PE=1 SV=1	2803600	1234600	10841000	10309000	6274300	8283200	22271000	12867000	22415000	23627000	28856000	31334000	11398000	9740600	17646000	12690000	1	1313900	17710000	17846000	25179000	29168000	13253000	15367000
Q86VP6;Q86VP6-2;H0YH27;Q86VP6-3	Cullin-associated NEDD8-dissociated protein 1	CAND1	>sp|Q86VP6|CAND1_HUMAN Cullin-associated NEDD8-dissociated protein 1 OS=Homo sapiens GN=CAND1 PE=1 SV=2;>sp|Q86VP6-2|CAND1_HUMAN Isoform 2 of Cullin-associated NEDD8-dissociated protein 1 OS=Homo sapiens GN=CAND1	709740	1	1	1457200	9091400	2295800	7779700	4583300	125040000	3810100	135300000	16630000	19357000	1	158890000	14907000	10778000	73133000	40692000	23615000	89143000	16733000	78957000	143890000
Q86YV5	Tyrosine-protein kinase SgK223	SGK223	>sp|Q86YV5|SG223_HUMAN Tyrosine-protein kinase SgK223 OS=Homo sapiens GN=SGK223 PE=1 SV=3	1	1	1	1	1	1	1	1	1	1	1	1	1	1	1	1	1	1	4130200	1	1	1	1	1
Q8IWI9-4;Q8IWI9;Q8IWI9-3	MAX gene-associated protein	MGA	>sp|Q8IWI9-4|MGAP_HUMAN Isoform 4 of MAX gene-associated protein OS=Homo sapiens GN=MGA;>sp|Q8IWI9|MGAP_HUMAN MAX gene-associated protein OS=Homo sapiens GN=MGA PE=1 SV=3;>sp|Q8IWI9-3|MGAP_HUMAN Isoform 3 of MAX gene-associated protein OS=Homo sapiens GN=M	3761100	4050600	6725700	5152300	2418100	2027600	6451000	4750100	7406900	5571100	5740700	5323900	4449000	3292300	6107400	7054400	3318300	6311800	5811000	5198000	9078700	9411000	4331300	3963600
Q8IX12;Q8IX12-2;F5H2E6;F5H1H2;F5H3E1;H0YFJ7;F5H7M9	Cell division cycle and apoptosis regulator protein 1	CCAR1	>sp|Q8IX12|CCAR1_HUMAN Cell division cycle and apoptosis regulator protein 1 OS=Homo sapiens GN=CCAR1 PE=1 SV=2;>sp|Q8IX12-2|CCAR1_HUMAN Isoform 2 of Cell division cycle and apoptosis regulator protein 1 OS=Homo sapiens GN=CCAR1;>tr|F5H2E6|F5H2E6_HUMAN Cel	62796000	55431000	57245000	64736000	36591000	39821000	83238000	71905000	83505000	72375000	67328000	68000000	44589000	48961000	64934000	71111000	44121000	42571000	70475000	64057000	67093000	66522000	68573000	57773000
Q8N163;Q8N163-2;H0YB24;E5RFJ3;E5RGU7;E5RHJ4;H0YC58;H0YC69;E5RHH8;P11532;E9PDN5;P11532-4;P11532-2;P11532-3;H0Y8D5;H0Y304;I3L0W2;I3L400;REV__P51888;E9PNP6	DBIRD complex subunit KIAA1967	KIAA1967	>sp|Q8N163|CCAR2_HUMAN Cell cycle and apoptosis regulator protein 2 OS=Homo sapiens GN=CCAR2 PE=1 SV=2;>sp|Q8N163-2|CCAR2_HUMAN Isoform 2 of Cell cycle and apoptosis regulator protein 2 OS=Homo sapiens GN=CCAR2;>tr|H0YB24|H0YB24_HUMAN Cell cycle and apopto	106660000	92565000	149200000	155730000	45219000	47451000	102900000	119460000	99152000	89815000	118570000	107840000	90119000	91374000	88402000	78580000	81124000	93518000	67394000	65731000	20346000	24645000	48425000	54505000
Q8N5C8;Q8N5C8-2;F6SS63;A6ND79	TGF-beta-activated kinase 1 and MAP3K7-binding protein 3	TAB3	>sp|Q8N5C8|TAB3_HUMAN TGF-beta-activated kinase 1 and MAP3K7-binding protein 3 OS=Homo sapiens GN=TAB3 PE=1 SV=2;>sp|Q8N5C8-2|TAB3_HUMAN Isoform 2 of TGF-beta-activated kinase 1 and MAP3K7-binding protein 3 OS=Homo sapiens GN=TAB3;>tr|F6SS63|F6SS63_HUMAN T	30322000	37472000	48068000	50895000	24585000	25604000	73489000	78680000	62648000	75649000	68393000	73131000	43928000	43471000	55047000	55443000	51607000	45182000	56019000	65167000	86666000	75752000	56439000	48720000
Q8N5Z5;Q8N5Z5-2;H0Y731	BTB/POZ domain-containing protein KCTD17	KCTD17	>sp|Q8N5Z5|KCD17_HUMAN BTB/POZ domain-containing protein KCTD17 OS=Homo sapiens GN=KCTD17 PE=1 SV=3;>sp|Q8N5Z5-2|KCD17_HUMAN Isoform 2 of BTB/POZ domain-containing protein KCTD17 OS=Homo sapiens GN=KCTD17;>tr|H0Y731|H0Y731_HUMAN BTB/POZ domain-containing p	9283500	7265200	8906300	9681000	1	2242400	18364000	18230000	17138000	21896000	16906000	18064000	5926000	5947700	12646000	9861300	12219000	10953000	21431000	19136000	26654000	27191000	9569900	7959500
Q8N684-3;Q8N684;Q8N684-2;F5H669;F5H047;F5H6M0;J3QT54;C9J323;C9J286;C9JM38;F5GXA3;F5H6A8;F5H6P5;F5H2K8;F5H1W4;F5H5B7	Cleavage and polyadenylation specificity factor subunit 7	CPSF7	>sp|Q8N684-3|CPSF7_HUMAN Isoform 3 of Cleavage and polyadenylation specificity factor subunit 7 OS=Homo sapiens GN=CPSF7;>sp|Q8N684|CPSF7_HUMAN Cleavage and polyadenylation specificity factor subunit 7 OS=Homo sapiens GN=CPSF7 PE=1 SV=1;>sp|Q8N684-2|CPSF7_	13191000	9479600	11056000	9784900	9084000	8052300	8701400	15331000	9907400	13467000	16989000	17262000	10996000	13756000	17756000	18993000	7663100	8549400	12560000	9275600	12664000	13599000	19230000	9257400
Q8NC51;Q8NC51-3	Plasminogen activator inhibitor 1 RNA-binding protein	SERBP1	>sp|Q8NC51|PAIRB_HUMAN Plasminogen activator inhibitor 1 RNA-binding protein OS=Homo sapiens GN=SERBP1 PE=1 SV=2;>sp|Q8NC51-3|PAIRB_HUMAN Isoform 3 of Plasminogen activator inhibitor 1 RNA-binding protein OS=Homo sapiens GN=SERBP1	371590000	389390000	40534000	39733000	37442000	41799000	29031000	36808000	40054000	50162000	45056000	41733000	289280000	343260000	22944000	27000000	99947000	106080000	21810000	19770000	33153000	32202000	27223000	32407000
Q8NCE2;Q8NCE2-2;Q8NCE2-3;B4DQK9;C9JSR1;B4DJ23;F8WCC0;F8WEA3	Myotubularin-related protein 14	MTMR14	>sp|Q8NCE2|MTMRE_HUMAN Myotubularin-related protein 14 OS=Homo sapiens GN=MTMR14 PE=1 SV=2;>sp|Q8NCE2-2|MTMRE_HUMAN Isoform 2 of Myotubularin-related protein 14 OS=Homo sapiens GN=MTMR14;>sp|Q8NCE2-3|MTMRE_HUMAN Isoform 3 of Myotubularin-related protein 14	231350000	152090000	298250000	258080000	167810000	148960000	359960000	337250000	406510000	406060000	377280000	335470000	229320000	282000000	282400000	304790000	388030000	375500000	395170000	423420000	314500000	345910000	328330000	346140000
Q8ND56;Q8ND56-2;B4DTG6;K7EMZ9	Protein LSM14 homolog A	LSM14A	>sp|Q8ND56|LS14A_HUMAN Protein LSM14 homolog A OS=Homo sapiens GN=LSM14A PE=1 SV=3;>sp|Q8ND56-2|LS14A_HUMAN Isoform 2 of Protein LSM14 homolog A OS=Homo sapiens GN=LSM14A;>tr|B4DTG6|B4DTG6_HUMAN Protein LSM14 homolog A OS=Homo sapiens GN=LSM14A PE=2 SV=1;>	6462700	4715900	10265000	8662900	7496900	7809100	10804000	15399000	8244400	6572200	8672800	7552600	10100000	6312000	9122500	8882900	7905500	7566900	16545000	10829000	8493900	14245000	13240000	14916000
Q8NHQ1;Q8NHQ1-4;Q8NHQ1-5;Q8NHQ1-2;C9J966;C9J710;Q8NHQ1-3;C9JZ04	Centrosomal protein of 70 kDa	CEP70	>sp|Q8NHQ1|CEP70_HUMAN Centrosomal protein of 70 kDa OS=Homo sapiens GN=CEP70 PE=1 SV=2;>sp|Q8NHQ1-4|CEP70_HUMAN Isoform 4 of Centrosomal protein of 70 kDa OS=Homo sapiens GN=CEP70;>sp|Q8NHQ1-5|CEP70_HUMAN Isoform 5 of Centrosomal protein of 70 kDa OS=Homo	4124300	4006800	4717900	5560900	26808000	1	13611000	32438000	1	5471200	3968700	8971900	11728000	1249100	5741300	12344000	1	1825300	27052000	29267000	5745100	33553000	5680400	6227800
Q8TA86;C9J6V2	Retinitis pigmentosa 9 protein	RP9	>sp|Q8TA86|RP9_HUMAN Retinitis pigmentosa 9 protein OS=Homo sapiens GN=RP9 PE=1 SV=2	5357700	6604200	14063000	13527000	6284200	6452100	30953000	28863000	30795000	39158000	26870000	31026000	20259000	22695000	30135000	30851000	29259000	27708000	30013000	26956000	37700000	41451000	33317000	27428000
Q8TF72	Protein Shroom3	SHROOM3	>sp|Q8TF72|SHRM3_HUMAN Protein Shroom3 OS=Homo sapiens GN=SHROOM3 PE=1 SV=2	3239500	3098900	88863000	85014000	89843000	86165000	153430000	167860000	87542000	100860000	155360000	157170000	45365000	45154000	160480000	159310000	88123000	72794000	108320000	99607000	238060000	176350000	74375000	1
Q8WUA2	Peptidyl-prolyl cis-trans isomerase-like 4	PPIL4	>sp|Q8WUA2|PPIL4_HUMAN Peptidyl-prolyl cis-trans isomerase-like 4 OS=Homo sapiens GN=PPIL4 PE=1 SV=1	30561000	34599000	52246000	52254000	62462000	62441000	51402000	68700000	85655000	78254000	71383000	75941000	66150000	67404000	68905000	67863000	62149000	61564000	59405000	65153000	71331000	77409000	67282000	52185000
Q8WVV4-1;Q8WVV4	Protein POF1B	POF1B	>sp|Q8WVV4-1|POF1B_HUMAN Isoform 1 of Protein POF1B OS=Homo sapiens GN=POF1B;>sp|Q8WVV4|POF1B_HUMAN Protein POF1B OS=Homo sapiens GN=POF1B PE=1 SV=3	1	1	1544800	1	1230200	1231700	1531000	1	1	2179000	1905300	1910900	1125500	1	1798500	1259400	1404300	1572500	1753500	1	1132400	1995300	2389500	1
Q8WW12;Q8WW12-2	PEST proteolytic signal-containing nuclear protein	PCNP	>sp|Q8WW12|PCNP_HUMAN PEST proteolytic signal-containing nuclear protein OS=Homo sapiens GN=PCNP PE=1 SV=2;>sp|Q8WW12-2|PCNP_HUMAN Isoform 2 of PEST proteolytic signal-containing nuclear protein OS=Homo sapiens GN=PCNP	886710	1056200	1589300	1558100	886530	1	2121600	2347600	1421000	1756800	1583000	1985000	1600800	1319500	1427300	1524900	1481500	1271400	1198000	1163600	3628200	1933500	1184800	1118800
Q8WWY3;E7EVX8;E7ESA8;Q8WWY3-2;Q8WWY3-3;E7EN72;E7ESX0;E7EU94	U4/U6 small nuclear ribonucleoprotein Prp31	PRPF31	>sp|Q8WWY3|PRP31_HUMAN U4/U6 small nuclear ribonucleoprotein Prp31 OS=Homo sapiens GN=PRPF31 PE=1 SV=2;>tr|E7EVX8|E7EVX8_HUMAN U4/U6 small nuclear ribonucleoprotein Prp31 OS=Homo sapiens GN=PRPF31 PE=2 SV=1;>tr|E7ESA8|E7ESA8_HUMAN U4/U6 small nuclear ribon	372940000	335470000	548990000	548200000	491160000	454240000	640470000	648700000	654220000	649830000	642450000	672960000	405780000	402750000	540740000	535340000	486430000	465260000	642390000	640410000	739410000	747060000	634460000	650120000
Q8WXF1;Q8WXF1-2	Paraspeckle component 1	PSPC1	>sp|Q8WXF1|PSPC1_HUMAN Paraspeckle component 1 OS=Homo sapiens GN=PSPC1 PE=1 SV=1;>sp|Q8WXF1-2|PSPC1_HUMAN Isoform 2 of Paraspeckle component 1 OS=Homo sapiens GN=PSPC1	12171000	8066300	11069000	11008000	6223600	1	8330700	9414400	9073700	8957000	6942100	7582800	7825300	6634000	8510000	7828700	6175900	7939200	10222000	10999000	9592800	9775800	9845500	8638900
Q8WXX5	DnaJ homolog subfamily C member 9	DNAJC9	>sp|Q8WXX5|DNJC9_HUMAN DnaJ homolog subfamily C member 9 OS=Homo sapiens GN=DNAJC9 PE=1 SV=1	3396700	3255100	1	2870300	3528100	1	2288600	2269100	1	2062900	1	2180400	3354900	2851200	1	1908400	2050600	1	1	1	1	1	1	1
Q92522	Histone H1x	H1FX	>sp|Q92522|H1X_HUMAN Histone H1x OS=Homo sapiens GN=H1FX PE=1 SV=1	1	3505800	1	1	1	1	1	1	1	1	1	1	1	1	1	1	1	1	1	1	1	1	1	1
Q92526;Q92526-3;Q92526-2	T-complex protein 1 subunit zeta-2	CCT6B	>sp|Q92526|TCPW_HUMAN T-complex protein 1 subunit zeta-2 OS=Homo sapiens GN=CCT6B PE=1 SV=5;>sp|Q92526-3|TCPW_HUMAN Isoform 3 of T-complex protein 1 subunit zeta-2 OS=Homo sapiens GN=CCT6B;>sp|Q92526-2|TCPW_HUMAN Isoform 2 of T-complex protein 1 subunit ze	1	1	1	1	37650000	1	1	19322000	15801000	13374000	1	1	1	1	14526000	1	12557000	1	16816000	1	1	1	1	1
Q92620;B4DVG8;H3BQT9;J3KRT1;J3KTG2;H3BV01	Pre-mRNA-splicing factor ATP-dependent RNA helicase PRP16	DHX38	>sp|Q92620|PRP16_HUMAN Pre-mRNA-splicing factor ATP-dependent RNA helicase PRP16 OS=Homo sapiens GN=DHX38 PE=1 SV=2	59848000	51379000	54805000	61567000	59245000	77922000	59911000	65629000	57224000	54292000	63771000	53880000	32642000	41803000	42575000	46412000	47749000	43114000	43482000	44984000	83595000	65334000	51409000	56018000
Q92858	Protein atonal homolog 1	ATOH1	>sp|Q92858|ATOH1_HUMAN Protein atonal homolog 1 OS=Homo sapiens GN=ATOH1 PE=2 SV=1	1	95711000	1	1	1	1	1	1	1	1	1	1	1	1	1	1	1	1	87352000	120870000	1	78100000	182370000	1
Q92945;M0R0I5;B4DT31;E9PEB5;Q96AE4-2;Q96AE4;Q96I24;Q96I24-2;M0QYH3	Far upstream element-binding protein 2	KHSRP	>sp|Q92945|FUBP2_HUMAN Far upstream element-binding protein 2 OS=Homo sapiens GN=KHSRP PE=1 SV=4;>tr|M0R0I5|M0R0I5_HUMAN Far upstream element-binding protein 2 (Fragment) OS=Homo sapiens GN=KHSRP PE=4 SV=1	28186000	9741400	14303000	18786000	9821900	8062600	4838200	3025000	1	1	2992000	1	3994200	1	1	1	4956600	5521200	4352900	5460500	1	5631800	4688800	4649000
Q93045-2;Q93045;E5RGX5;P16949-2;P16949;A2A2D0	Stathmin-2;Stathmin	STMN2;STMN1	>sp|Q93045-2|STMN2_HUMAN Isoform 2 of Stathmin-2 OS=Homo sapiens GN=STMN2;>sp|Q93045|STMN2_HUMAN Stathmin-2 OS=Homo sapiens GN=STMN2 PE=1 SV=3;>tr|E5RGX5|E5RGX5_HUMAN Stathmin OS=Homo sapiens GN=STMN2 PE=2 SV=1;>sp|P16949-2|STMN1_HUMAN Isoform 2 of Stathmi	863760	4021300	8390200	6399100	2269000	2252700	1	1748500	1	1	1	1	5202900	3012700	900290	1	1	1	2045500	1223000	1635500	1284600	1693000	1
Q969Q0	60S ribosomal protein L36a-like	RPL36AL	>sp|Q969Q0|RL36L_HUMAN 60S ribosomal protein L36a-like OS=Homo sapiens GN=RPL36AL PE=1 SV=3	91441000	90194000	6215400	8404800	6225000	11552000	8595900	8998700	13585000	15901000	11326000	14565000	73554000	69743000	16511000	12135000	19424000	20241000	7987500	6698000	6621400	7394100	14144000	13376000
Q969S3	Zinc finger protein 622	ZNF622	>sp|Q969S3|ZN622_HUMAN Zinc finger protein 622 OS=Homo sapiens GN=ZNF622 PE=1 SV=1	33692000	21163000	1	1	1	1	1	1	1	1	8521100	11832000	1	12106000	1	1	1	12898000	1	1	1	1	1	1
Q96AG4;I3L223	Leucine-rich repeat-containing protein 59	LRRC59	>sp|Q96AG4|LRC59_HUMAN Leucine-rich repeat-containing protein 59 OS=Homo sapiens GN=LRRC59 PE=1 SV=1	211120000	237710000	107110000	106340000	131660000	123430000	115560000	133600000	132790000	115550000	71070000	63302000	252210000	192030000	226980000	262910000	243030000	229220000	63146000	63959000	95569000	105760000	146830000	151690000
Q96AV8;Q96AV8-3;Q96AV8-2;F8VSE7;H0YIF4;H0YHW2;F8VXV5	Transcription factor E2F7	E2F7	>sp|Q96AV8|E2F7_HUMAN Transcription factor E2F7 OS=Homo sapiens GN=E2F7 PE=1 SV=3;>sp|Q96AV8-3|E2F7_HUMAN Isoform 3 of Transcription factor E2F7 OS=Homo sapiens GN=E2F7;>sp|Q96AV8-2|E2F7_HUMAN Isoform 2 of Transcription factor E2F7 OS=Homo sapiens GN=E2F7;	30503000	35335000	59609000	47381000	30461000	19757000	66642000	64762000	59219000	56428000	71064000	60379000	26788000	39896000	51817000	50027000	35171000	44624000	44122000	54202000	74559000	81245000	58382000	55957000
Q96CT7;M0R2F5	Coiled-coil domain-containing protein 124	CCDC124	>sp|Q96CT7|CC124_HUMAN Coiled-coil domain-containing protein 124 OS=Homo sapiens GN=CCDC124 PE=1 SV=1;>tr|M0R2F5|M0R2F5_HUMAN Coiled-coil domain-containing protein 124 (Fragment) OS=Homo sapiens GN=CCDC124 PE=2 SV=1	15714000	1	1	1	1	1	1	1	1	1	1	1	25326000	1	1	1	1	1	1	1	2582100	1	1	1
Q96DG6	Carboxymethylenebutenolidase homolog	CMBL	>sp|Q96DG6|CMBL_HUMAN Carboxymethylenebutenolidase homolog OS=Homo sapiens GN=CMBL PE=1 SV=1	1	1	1	10285000	1	1	11209000	9498900	10715000	9442400	10123000	9071100	1	1	9889700	7389900	1	1	10823000	11315000	1	13166000	12448000	15082000
Q96HS1;Q96HS1-2;F5GXG4	Serine/threonine-protein phosphatase PGAM5, mitochondrial	PGAM5	>sp|Q96HS1|PGAM5_HUMAN Serine/threonine-protein phosphatase PGAM5, mitochondrial OS=Homo sapiens GN=PGAM5 PE=1 SV=2;>sp|Q96HS1-2|PGAM5_HUMAN Isoform 2 of Serine/threonine-protein phosphatase PGAM5, mitochondrial OS=Homo sapiens GN=PGAM5	318890000	355780000	611230000	605690000	270350000	273800000	600570000	646050000	619970000	607160000	603940000	601830000	554500000	532630000	641280000	650190000	546730000	539180000	618820000	655250000	696160000	726400000	586090000	552210000
Q96I25;Q5W010;Q5W011;Q5W012;H0Y6J6	Splicing factor 45	RBM17	>sp|Q96I25|SPF45_HUMAN Splicing factor 45 OS=Homo sapiens GN=RBM17 PE=1 SV=1;>tr|Q5W010|Q5W010_HUMAN Splicing factor 45 (Fragment) OS=Homo sapiens GN=RBM17 PE=2 SV=1;>tr|Q5W011|Q5W011_HUMAN Splicing factor 45 (Fragment) OS=Homo sapiens GN=RBM17 PE=2 SV=1;>	23286000	19313000	37078000	40452000	33951000	23485000	69053000	61614000	61462000	65410000	70444000	78830000	50958000	44152000	65259000	59675000	54395000	50271000	62635000	57886000	85402000	90255000	43952000	46967000
Q96JH8;Q96JH8-1;B7Z2I1;F5H6X3;F8WEM1;C9J7G0;Q96JH8-2;Q96JH8-3	Ras-associating and dilute domain-containing protein	RADIL	>sp|Q96JH8|RADIL_HUMAN Ras-associating and dilute domain-containing protein OS=Homo sapiens GN=RADIL PE=1 SV=5;>sp|Q96JH8-1|RADIL_HUMAN Isoform 1 of Ras-associating and dilute domain-containing protein OS=Homo sapiens GN=RADIL;>tr|B7Z2I1|B7Z2I1_HUMAN Ras-a	11036000	1	18771000	1	22418000	1	1	1	1	1	1	1	38884000	87397000	115940000	141010000	156720000	129410000	1	4327300	4315800	4820800	1	1
Q96N67;Q96N67-6;Q96N67-2;Q96N67-5;Q96N67-3;Q96N67-4;H0Y7L2	Dedicator of cytokinesis protein 7	DOCK7	>sp|Q96N67|DOCK7_HUMAN Dedicator of cytokinesis protein 7 OS=Homo sapiens GN=DOCK7 PE=1 SV=4;>sp|Q96N67-6|DOCK7_HUMAN Isoform 6 of Dedicator of cytokinesis protein 7 OS=Homo sapiens GN=DOCK7;>sp|Q96N67-2|DOCK7_HUMAN Isoform 2 of Dedicator of cytokinesis pr	1	32580000	42901000	1	1	1	48883000	1	1	1	53703000	59530000	1	1	1	1	1	1	56901000	34437000	84039000	1	46922000	42948000
Q99417	C-Myc-binding protein	MYCBP	>sp|Q99417|MYCBP_HUMAN C-Myc-binding protein OS=Homo sapiens GN=MYCBP PE=1 SV=3	517510000	443260000	927690000	1100000000	403440000	367590000	1395900000	1396000000	1244300000	1450600000	1670800000	1543800000	779090000	910290000	1104500000	1197300000	990560000	1001600000	971130000	1194200000	1302500000	1489000000	982360000	1112200000
Q99460;Q99460-2;C9J9M4;H7C378;H7BZR6	26S proteasome non-ATPase regulatory subunit 1	PSMD1	>sp|Q99460|PSMD1_HUMAN 26S proteasome non-ATPase regulatory subunit 1 OS=Homo sapiens GN=PSMD1 PE=1 SV=2;>sp|Q99460-2|PSMD1_HUMAN Isoform 2 of 26S proteasome non-ATPase regulatory subunit 1 OS=Homo sapiens GN=PSMD1;>tr|C9J9M4|C9J9M4_HUMAN 26S proteasome no	1	486650	1	3912500	1	1	2279200	2106400	1	1	1	1300200	1	1	1	1859100	1	1486300	1	1	1	1	1698100	1492100
Q99497;K7ELW0;K7EN27	Protein DJ-1	PARK7	>sp|Q99497|PARK7_HUMAN Protein DJ-1 OS=Homo sapiens GN=PARK7 PE=1 SV=2;>tr|K7ELW0|K7ELW0_HUMAN Protein DJ-1 OS=Homo sapiens GN=PARK7 PE=2 SV=1	14273000	10571000	6100500	11120000	4185000	5807300	3947800	3594400	3057000	2694200	4377400	1936300	4747000	4093900	3341600	3907500	3794900	3186700	3848900	2401800	3624200	3119500	1973400	3186500
Q99613;B5ME19;H3BRV0;H3BPE4;H3BPE3;H3BTY8	Eukaryotic translation initiation factor 3 subunit C	EIF3C;EIF3CL	>sp|Q99613|EIF3C_HUMAN Eukaryotic translation initiation factor 3 subunit C OS=Homo sapiens GN=EIF3C PE=1 SV=1;>sp|B5ME19|EIFCL_HUMAN Eukaryotic translation initiation factor 3 subunit C-like protein OS=Homo sapiens GN=EIF3CL PE=3 SV=1;>tr|H3BRV0|H3BRV0_HU	142820000	145200000	242610000	236620000	214390000	220360000	200880000	215940000	209700000	194910000	195680000	192950000	217060000	217380000	214090000	218780000	169770000	161560000	149670000	159720000	205230000	219430000	182540000	196430000
Q99729-2;D6RBZ0;Q99729-3;D6RD18;D6R9P3;Q99729;Q99729-4	Heterogeneous nuclear ribonucleoprotein A/B	HNRNPAB	>sp|Q99729-2|ROAA_HUMAN Isoform 2 of Heterogeneous nuclear ribonucleoprotein A/B OS=Homo sapiens GN=HNRNPAB;>tr|D6RBZ0|D6RBZ0_HUMAN Heterogeneous nuclear ribonucleoprotein A/B OS=Homo sapiens GN=HNRNPAB PE=2 SV=1;>sp|Q99729-3|ROAA_HUMAN Isoform 3 of Hetero	21115000	13768000	4930800	13729000	6861400	7110100	13786000	10865000	7754300	9946300	8865500	7493500	27141000	7596700	9821100	10831000	7857200	11965000	10250000	5771300	4106900	4912000	4460800	3512200
Q99832;Q99832-3;Q99832-4;F5GZK5;B7Z1C9;Q99832-2;F8WAM2;F8WBP8	T-complex protein 1 subunit eta	CCT7	>sp|Q99832|TCPH_HUMAN T-complex protein 1 subunit eta OS=Homo sapiens GN=CCT7 PE=1 SV=2;>sp|Q99832-3|TCPH_HUMAN Isoform 3 of T-complex protein 1 subunit eta OS=Homo sapiens GN=CCT7;>sp|Q99832-4|TCPH_HUMAN Isoform 4 of T-complex protein 1 subunit eta OS=Hom	230460000	237000000	212400000	235010000	326060000	312070000	147270000	133000000	145680000	121330000	115310000	120500000	161900000	147940000	147320000	151570000	115630000	115810000	117770000	122910000	142590000	144060000	128170000	135380000
Q99873-4;H7C2I1;Q99873;Q99873-2;Q99873-3;E9PKG1;E9PIX6;E9PQ98;H0YDE4;E9PNR9;E9PI83;E9PMW9;Q9NR22;Q9NR22-2;E9PMZ2	Protein arginine N-methyltransferase 1	PRMT1	>sp|Q99873-4|ANM1_HUMAN Isoform 4 of Protein arginine N-methyltransferase 1 OS=Homo sapiens GN=PRMT1;>tr|H7C2I1|H7C2I1_HUMAN Protein arginine N-methyltransferase 1 OS=Homo sapiens GN=PRMT1 PE=2 SV=1;>sp|Q99873|ANM1_HUMAN Protein arginine N-methyltransferas	978540000	804510000	1128600000	1079900000	353850000	292070000	1338800000	1122500000	1112100000	970390000	861950000	908310000	708060000	590410000	834510000	798900000	634320000	687530000	912170000	971000000	1078200000	935390000	854190000	804760000
Q99943	1-acyl-sn-glycerol-3-phosphate acyltransferase alpha	AGPAT1	>sp|Q99943|PLCA_HUMAN 1-acyl-sn-glycerol-3-phosphate acyltransferase alpha OS=Homo sapiens GN=AGPAT1 PE=1 SV=2	1	1	1	1	1	1	1	1	1	1	1	1	1	1	1	1	1	1	1	1	1	1	1	1
Q9BQA1;B4DP38;H0Y711	Methylosome protein 50	WDR77	>sp|Q9BQA1|MEP50_HUMAN Methylosome protein 50 OS=Homo sapiens GN=WDR77 PE=1 SV=1;>tr|B4DP38|B4DP38_HUMAN Methylosome protein 50 OS=Homo sapiens GN=WDR77 PE=2 SV=1;>tr|H0Y711|H0Y711_HUMAN Methylosome protein 50 (Fragment) OS=Homo sapiens GN=WDR77 PE=4 SV=1	3505300000	3863200000	4813200000	4797900000	2751000000	2475200000	6767900000	7241200000	7449900000	6837700000	6887600000	6461600000	3815400000	3879700000	5896100000	5551300000	5977400000	6162000000	7948700000	9015200000	8065100000	7397100000	7192800000	7363400000
Q9BR76;E7EW44;F5H390;F5H0D2	Coronin-1B	CORO1B	>sp|Q9BR76|COR1B_HUMAN Coronin-1B OS=Homo sapiens GN=CORO1B PE=1 SV=1	1	1	4668800	4538600	1	1	4551900	3479300	3364100	3822700	1	1	1	1	2889400	1	1839200	2421000	1	1	1801000	1	1	3749600
Q9BRR8	G patch domain-containing protein 1	GPATCH1	>sp|Q9BRR8|GPTC1_HUMAN G patch domain-containing protein 1 OS=Homo sapiens GN=GPATCH1 PE=1 SV=1	1	6240500	2721200	3078000	2399600	1684500	3520700	3472100	6673000	3533200	4787500	3404500	4477500	2678200	2531400	2644000	4136000	3099000	2626100	3171800	4163900	4870600	2663900	2642700
Q9BRS2	Serine/threonine-protein kinase RIO1	RIOK1	>sp|Q9BRS2|RIOK1_HUMAN Serine/threonine-protein kinase RIO1 OS=Homo sapiens GN=RIOK1 PE=1 SV=2	215280000	238190000	437930000	526950000	145280000	163340000	586040000	603030000	562670000	547050000	595960000	570410000	363990000	342810000	464380000	459240000	384430000	419690000	466310000	453340000	645300000	648580000	463680000	445370000
Q9BU76;Q9BU76-4;Q9BU76-3;Q9BU76-2	Multiple myeloma tumor-associated protein 2	MMTAG2	>sp|Q9BU76|MMTA2_HUMAN Multiple myeloma tumor-associated protein 2 OS=Homo sapiens GN=MMTAG2 PE=1 SV=1;>sp|Q9BU76-4|MMTA2_HUMAN Isoform 4 of Multiple myeloma tumor-associated protein 2 OS=Homo sapiens GN=MMTAG2;>sp|Q9BU76-3|MMTA2_HUMAN Isoform 3 of Multipl	4789200	5461200	3495000	3231000	4037100	3241300	3754100	3867500	1	1	3546600	3377600	4039000	3706300	4372300	4275000	4553700	3669200	1	1	1	3931700	1	1
Q9BUA3;H0YGY5;H0YGK9	Uncharacterized protein C11orf84	C11orf84	>sp|Q9BUA3|CK084_HUMAN Uncharacterized protein C11orf84 OS=Homo sapiens GN=C11orf84 PE=1 SV=3	342150000	269330000	433970000	444160000	161530000	178430000	646130000	606980000	568580000	541880000	585660000	594060000	337190000	352400000	495940000	488020000	414630000	427350000	532390000	559150000	666760000	655090000	458850000	435360000
Q9BUF5;K7ESM5;K7EL29;K7ES63;K7EPE5;K7EN98;K7EJZ4;K7ERA8;K7EJ64;K7EQT3;K7ESQ3	Tubulin beta-6 chain	TUBB6	>sp|Q9BUF5|TBB6_HUMAN Tubulin beta-6 chain OS=Homo sapiens GN=TUBB6 PE=1 SV=1;>tr|K7ESM5|K7ESM5_HUMAN Tubulin beta-6 chain (Fragment) OS=Homo sapiens GN=TUBB6 PE=2 SV=1	4778000	3965300	1553000	1477400	6035500	6265900	1402300	1387000	1305300	1268000	1416900	4870400	1789000	1271500	1472000	1	1079300	1068900	1	1	1	1528500	1280000	1
Q9BVP2;Q9BVP2-2;B4DMU5;C9JZT7;C9JYH9	Guanine nucleotide-binding protein-like 3	GNL3	>sp|Q9BVP2|GNL3_HUMAN Guanine nucleotide-binding protein-like 3 OS=Homo sapiens GN=GNL3 PE=1 SV=2;>sp|Q9BVP2-2|GNL3_HUMAN Isoform 2 of Guanine nucleotide-binding protein-like 3 OS=Homo sapiens GN=GNL3	31881000	36115000	1	4091200	1293900	3486000	1	3901700	10716000	3541200	2967900	2246200	4817400	5844600	3028800	3280000	4346100	2463300	20373000	24243000	1	5006700	14671000	13044000
Q9BWJ5	Splicing factor 3B subunit 5	SF3B5	>sp|Q9BWJ5|SF3B5_HUMAN Splicing factor 3B subunit 5 OS=Homo sapiens GN=SF3B5 PE=1 SV=1	58463000	41648000	36167000	35995000	30301000	33011000	39022000	41989000	38463000	35407000	43996000	49448000	27124000	34777000	42576000	36290000	31572000	29966000	37015000	40220000	44396000	50934000	27608000	28669000
Q9BWU0	Kanadaptin	SLC4A1AP	>sp|Q9BWU0|NADAP_HUMAN Kanadaptin OS=Homo sapiens GN=SLC4A1AP PE=1 SV=1	1	1	1	1	1	1	1	1	1	6748200	1	1	1	1	1	1	1	1	1	1	1	1	1	1
Q9BXP5;Q9BXP5-3;Q9BXP5-2;Q9BXP5-4;Q9BXP5-5;H7C3A1	Serrate RNA effector molecule homolog	SRRT	>sp|Q9BXP5|SRRT_HUMAN Serrate RNA effector molecule homolog OS=Homo sapiens GN=SRRT PE=1 SV=1;>sp|Q9BXP5-3|SRRT_HUMAN Isoform 3 of Serrate RNA effector molecule homolog OS=Homo sapiens GN=SRRT;>sp|Q9BXP5-2|SRRT_HUMAN Isoform 2 of Serrate RNA effector molec	1	1287300	8097800	6518700	8450600	8277500	6608700	6770100	7780400	9446800	3886700	4040500	5872200	4636200	12334000	9609700	3876000	4561300	1	6656100	8990500	8347200	7445700	10506000
Q9BYD3;K7ES61;Q9BYD3-2;K7ELQ0;K7ELF1;K7EKI4	39S ribosomal protein L4, mitochondrial	MRPL4	>sp|Q9BYD3|RM04_HUMAN 39S ribosomal protein L4, mitochondrial OS=Homo sapiens GN=MRPL4 PE=1 SV=1;>tr|K7ES61|K7ES61_HUMAN 39S ribosomal protein L4, mitochondrial (Fragment) OS=Homo sapiens GN=MRPL4 PE=2 SV=1;>sp|Q9BYD3-2|RM04_HUMAN Isoform 2 of 39S ribosoma	7962300	5979000	4463200	4290600	7610200	8324300	4659200	3820200	4734700	4213900	2770100	3400200	4080500	3998200	3417800	3310700	3658000	2849400	1	3982600	3030600	3950900	1	1
Q9BZE4;B7Z7A3;B4DY13;Q5T3R7	Nucleolar GTP-binding protein 1	GTPBP4	>sp|Q9BZE4|NOG1_HUMAN Nucleolar GTP-binding protein 1 OS=Homo sapiens GN=GTPBP4 PE=1 SV=3;>tr|B7Z7A3|B7Z7A3_HUMAN Nucleolar GTP-binding protein 1 OS=Homo sapiens GN=GTPBP4 PE=2 SV=1;>tr|B4DY13|B4DY13_HUMAN Nucleolar GTP-binding protein 1 OS=Homo sapiens GN	32868000	66794000	1703300	3597000	2086000	3017000	1	3602000	4544900	5481200	3140300	4004100	14915000	30132000	2838100	2558000	4532300	8685200	2746600	1	6656700	5045200	1	1
Q9GZT3;Q9GZT3-2;G3V2S9;G3V4X6;H0YJ40;H0YJW7;H0YJU7;H0YJ07;H0YJI1	SRA stem-loop-interacting RNA-binding protein, mitochondrial	SLIRP	>sp|Q9GZT3|SLIRP_HUMAN SRA stem-loop-interacting RNA-binding protein, mitochondrial OS=Homo sapiens GN=SLIRP PE=1 SV=1;>sp|Q9GZT3-2|SLIRP_HUMAN Isoform 2 of SRA stem-loop-interacting RNA-binding protein, mitochondrial OS=Homo sapiens GN=SLIRP;>tr|G3V2S9|G3	101860000	122200000	181550000	186930000	11539000	14475000	138610000	131800000	160850000	152310000	126740000	118750000	110580000	123080000	185220000	188920000	208600000	202950000	179600000	166670000	61596000	52511000	144500000	145030000
Q9H089;F8WFC6;H7C2X7	Large subunit GTPase 1 homolog	LSG1	>sp|Q9H089|LSG1_HUMAN Large subunit GTPase 1 homolog OS=Homo sapiens GN=LSG1 PE=1 SV=2;>tr|F8WFC6|F8WFC6_HUMAN Large subunit GTPase 1 homolog OS=Homo sapiens GN=LSG1 PE=2 SV=1	3731900	2062800	1	1	1	1	1	1	1	1	1	1	24083000	1	1	1	1	1	1	1	1	1	1	1
Q9H0D6;B4DZC3;Q9H0D6-2	5-3 exoribonuclease 2	XRN2	>sp|Q9H0D6|XRN2_HUMAN 5-3 exoribonuclease 2 OS=Homo sapiens GN=XRN2 PE=1 SV=1;>tr|B4DZC3|B4DZC3_HUMAN 5-3 exoribonuclease 2 OS=Homo sapiens GN=XRN2 PE=2 SV=1;>sp|Q9H0D6-2|XRN2_HUMAN Isoform 2 of 5-3 exoribonuclease 2 OS=Homo sapiens GN=XRN2	7746000	1	1	6327800	1	1	3558000	1	1	2547900	1	1	5919200	5224400	1	2429100	2913700	2911300	1	1	1	3026700	1	1
Q9H0G5	Nuclear speckle splicing regulatory protein 1	NSRP1	>sp|Q9H0G5|NSRP1_HUMAN Nuclear speckle splicing regulatory protein 1 OS=Homo sapiens GN=NSRP1 PE=1 SV=1	261830	757460	6309600	5966900	3865400	4723800	7137000	6856000	6324200	6863600	7215200	8025800	5894800	4872200	7604000	9424600	6258500	5894900	5694000	5103900	7410700	7828200	6247500	5709800
Q9H3K6;H3BVE0;H3BTW0;H3BV85;Q9H3K6-2	BolA-like protein 2	BOLA2;BOLA2B	>sp|Q9H3K6|BOLA2_HUMAN BolA-like protein 2 OS=Homo sapiens GN=BOLA2 PE=1 SV=1;>tr|H3BVE0|H3BVE0_HUMAN Protein LOC101060252 (Fragment) OS=Homo sapiens GN=LOC101060252 PE=3 SV=1;>tr|H3BTW0|H3BTW0_HUMAN Protein LOC101060252 (Fragment) OS=Homo sapiens GN=LOC10	277850000	277750000	356950000	378150000	366210000	333430000	354040000	358940000	340420000	355100000	351440000	335910000	243080000	208330000	367750000	400140000	311140000	338980000	509720000	469500000	480860000	514910000	443330000	459470000
Q9H7D7;Q9H7D7-2;H0Y9R3;Q9H7D7-4;Q9H7D7-3;H0Y917	WD repeat-containing protein 26	WDR26	>sp|Q9H7D7|WDR26_HUMAN WD repeat-containing protein 26 OS=Homo sapiens GN=WDR26 PE=1 SV=3;>sp|Q9H7D7-2|WDR26_HUMAN Isoform 2 of WD repeat-containing protein 26 OS=Homo sapiens GN=WDR26;>tr|H0Y9R3|H0Y9R3_HUMAN WD repeat-containing protein 26 (Fragment) OS=H	1	5746000	13993000	8089500	4364400	4994900	8150400	6616400	7222400	8973400	8171800	9050200	8813900	6376600	7990900	8012900	6416900	4876300	7084500	7033100	7564400	9063900	6970700	6318700
Q9HB71;Q9HB71-2;B2ZWH1	Calcyclin-binding protein	CACYBP	>sp|Q9HB71|CYBP_HUMAN Calcyclin-binding protein OS=Homo sapiens GN=CACYBP PE=1 SV=2;>sp|Q9HB71-2|CYBP_HUMAN Isoform 2 of Calcyclin-binding protein OS=Homo sapiens GN=CACYBP;>tr|B2ZWH1|B2ZWH1_HUMAN Calcyclin-binding protein (Fragment) OS=Homo sapiens GN=CAC	6605800	5287300	4124600	3035000	3389400	1	1	1	1	1	1	1	1	1	1	1	1	1	1	1	1	1	1	1
Q9NQ92;H9KV77;J3QRX4;J3QRX9;J3QRX6	Cooperator of PRMT5	COPR5;C17orf79	>sp|Q9NQ92|COPRS_HUMAN Coordinator of PRMT5 and differentiation stimulator OS=Homo sapiens GN=COPRS PE=1 SV=3;>tr|H9KV77|H9KV77_HUMAN Coordinator of PRMT5 and differentiation stimulator OS=Homo sapiens GN=COPRS PE=2 SV=1;>tr|J3QRX4|J3QRX4_HUMAN Coordinator	24854000	22635000	42179000	35868000	15590000	13239000	59486000	58576000	47300000	52327000	56638000	58310000	24009000	29950000	45140000	47613000	43348000	43087000	44056000	39061000	52277000	52032000	33069000	30483000
Q9NQX4	Unconventional myosin-Vc	MYO5C	>sp|Q9NQX4|MYO5C_HUMAN Unconventional myosin-Vc OS=Homo sapiens GN=MYO5C PE=1 SV=2	1	1	1	8482300	1	3366000	2382100	2268800	1	2051800	2105700	1	1	1	1904300	1931300	1	1	1	1	2336600	2061000	1	1
Q9NR30;Q9NR30-2;Q9BQ39	Nucleolar RNA helicase 2	DDX21	>sp|Q9NR30|DDX21_HUMAN Nucleolar RNA helicase 2 OS=Homo sapiens GN=DDX21 PE=1 SV=5;>sp|Q9NR30-2|DDX21_HUMAN Isoform 2 of Nucleolar RNA helicase 2 OS=Homo sapiens GN=DDX21	71660000	95434000	2203100	2149800	8029500	7750000	1	1	7045000	5104900	5611900	4918000	19549000	22767000	2597100	2211600	5756500	4605400	1	1	4303300	4427400	1	1
Q9NRX1	RNA-binding protein PNO1	PNO1	>sp|Q9NRX1|PNO1_HUMAN RNA-binding protein PNO1 OS=Homo sapiens GN=PNO1 PE=1 SV=1	13167000	22045000	31159000	1	1	1	1	1	18707000	1	15973000	8468600	6554100	1	1	1	1	1	1	1	1	1	1	1
Q9NRZ9;Q9NRZ9-2;Q9NRZ9-3;Q9NRZ9-4;Q9NRZ9-5;Q9NRZ9-6;Q9NW36	Lymphoid-specific helicase	HELLS	>sp|Q9NRZ9|HELLS_HUMAN Lymphoid-specific helicase OS=Homo sapiens GN=HELLS PE=1 SV=1;>sp|Q9NRZ9-2|HELLS_HUMAN Isoform 2 of Lymphoid-specific helicase OS=Homo sapiens GN=HELLS;>sp|Q9NRZ9-3|HELLS_HUMAN Isoform 3 of Lymphoid-specific helicase OS=Homo sapiens	1	1	1	1	1345900	1647900	1	1	1	1283200	1	1	1	841660	1	1	1	1	1329800	1	1	1	1	1
Q9NTG1	Polycystic kidney disease and receptor for egg jelly-related protein	PKDREJ	>sp|Q9NTG1|PKDRE_HUMAN Polycystic kidney disease and receptor for egg jelly-related protein OS=Homo sapiens GN=PKDREJ PE=2 SV=2	1	1	1	1	1	1	1	1	1	1	1	1	1	1	1	1	1	1	1	1	1	1	1	1
Q9NVI7;Q9NVI7-2;H0Y2W2;Q9NVI7-3;Q5T9A4;Q5T9A4-3;Q5T2N8;Q5SV16;Q5T9A4-2	ATPase family AAA domain-containing protein 3A;ATPase family AAA domain-containing protein 3B;ATPase family AAA domain-containing protein 3C	ATAD3A;ATAD3B;ATAD3C	>sp|Q9NVI7|ATD3A_HUMAN ATPase family AAA domain-containing protein 3A OS=Homo sapiens GN=ATAD3A PE=1 SV=2;>sp|Q9NVI7-2|ATD3A_HUMAN Isoform 2 of ATPase family AAA domain-containing protein 3A OS=Homo sapiens GN=ATAD3A;>tr|H0Y2W2|H0Y2W2_HUMAN ATPase family A	8840700	8282000	11866000	11820000	25547000	27188000	16900000	17555000	15478000	14252000	13193000	13692000	17367000	15313000	22584000	22263000	16157000	16704000	8655000	9112200	13860000	17244000	9604000	9277300
Q9NVU7;E7EW05;Q9NVU7-2	Protein SDA1 homolog	SDAD1	>sp|Q9NVU7|SDA1_HUMAN Protein SDA1 homolog OS=Homo sapiens GN=SDAD1 PE=1 SV=3;>tr|E7EW05|E7EW05_HUMAN Protein SDA1 homolog OS=Homo sapiens GN=SDAD1 PE=2 SV=1;>sp|Q9NVU7-2|SDA1_HUMAN Isoform 2 of Protein SDA1 homolog OS=Homo sapiens GN=SDAD1	1	1	3307600	1	1	1	1	1	1	1	1	1	1	1	1	1	1	1	1	1	1	1	1	1
Q9NWB6;Q9NWB6-2	Arginine and glutamate-rich protein 1	ARGLU1	>sp|Q9NWB6|ARGL1_HUMAN Arginine and glutamate-rich protein 1 OS=Homo sapiens GN=ARGLU1 PE=1 SV=1;>sp|Q9NWB6-2|ARGL1_HUMAN Isoform 2 of Arginine and glutamate-rich protein 1 OS=Homo sapiens GN=ARGLU1	41012000	44281000	150280000	154210000	104940000	106310000	208020000	209880000	186360000	208270000	180270000	189650000	121910000	135140000	198630000	205410000	187880000	174340000	213220000	166200000	205610000	191920000	202230000	179050000
Q9NWU2	Protein C20orf11	C20orf11	>sp|Q9NWU2|GID8_HUMAN Glucose-induced degradation protein 8 homolog OS=Homo sapiens GN=GID8 PE=1 SV=1	8258600	81774000	7247200	9468900	4526700	5387000	5070000	4713900	1671300	7817700	1803400	2025300	5228600	2413000	4826300	4349200	1679300	4828200	1384100	1674500	12305000	1	1704000	9967400
Q9NX58;D6RDJ1	Cell growth-regulating nucleolar protein	LYAR	>sp|Q9NX58|LYAR_HUMAN Cell growth-regulating nucleolar protein OS=Homo sapiens GN=LYAR PE=1 SV=2	47996000	40877000	1	1	1	1	1	1	1	1	1	1	1	6108100	1	1	1	1	1	1	1	1	1	1
Q9NX95;Q9NX95-3;Q9NX95-4;Q9NX95-2;Q9NX95-5;B7Z4D2;B3KRD1;E9PL50;E9PNN9;E9PL66;E9PN31;E9PLB9;E9PQG2;E9PRH8;E9PI48;E9PJ11;E9PPC2	Syntabulin	SYBU	>sp|Q9NX95|SYBU_HUMAN Syntabulin OS=Homo sapiens GN=SYBU PE=1 SV=2;>sp|Q9NX95-3|SYBU_HUMAN Isoform 3 of Syntabulin OS=Homo sapiens GN=SYBU;>sp|Q9NX95-4|SYBU_HUMAN Isoform 4 of Syntabulin OS=Homo sapiens GN=SYBU;>sp|Q9NX95-2|SYBU_HUMAN Isoform 2 of Syntabul	4594100	6017500	9774000	9364400	828240	1358500	11285000	3252500	11978000	10005000	17624000	15930000	9331900	12478000	17828000	14865000	16430000	14926000	13966000	10470000	14828000	15304000	9709500	10933000
Q9NXE8;B4DJK2;Q9NXE8-2;B4DZL1;J3QLP6	Pre-mRNA-splicing factor CWC25 homolog	CWC25	>sp|Q9NXE8|CWC25_HUMAN Pre-mRNA-splicing factor CWC25 homolog OS=Homo sapiens GN=CWC25 PE=1 SV=1;>tr|B4DJK2|B4DJK2_HUMAN Pre-mRNA-splicing factor CWC25 homolog OS=Homo sapiens GN=CWC25 PE=2 SV=1;>sp|Q9NXE8-2|CWC25_HUMAN Isoform 2 of Pre-mRNA-splicing facto	9770500	16752000	34647000	35245000	17557000	20404000	40696000	46907000	55868000	70092000	50025000	48746000	35455000	29421000	36631000	37329000	46356000	34864000	58139000	75321000	65992000	65800000	61118000	63888000
Q9NXV2;H3BSS5	BTB/POZ domain-containing protein KCTD5	KCTD5	>sp|Q9NXV2|KCTD5_HUMAN BTB/POZ domain-containing protein KCTD5 OS=Homo sapiens GN=KCTD5 PE=1 SV=1;>tr|H3BSS5|H3BSS5_HUMAN BTB/POZ domain-containing protein KCTD5 OS=Homo sapiens GN=KCTD5 PE=2 SV=1	69431000	70932000	87198000	88689000	25667000	30726000	154720000	115230000	409920000	444510000	131560000	161060000	93023000	80658000	107250000	102020000	262910000	219810000	609010000	604480000	152980000	140080000	305760000	282020000
Q9NYF8;Q9NYF8-2;Q9NYF8-4;H0YF14;B0AZU3	Bcl-2-associated transcription factor 1	BCLAF1	>sp|Q9NYF8|BCLF1_HUMAN Bcl-2-associated transcription factor 1 OS=Homo sapiens GN=BCLAF1 PE=1 SV=2;>sp|Q9NYF8-2|BCLF1_HUMAN Isoform 2 of Bcl-2-associated transcription factor 1 OS=Homo sapiens GN=BCLAF1;>sp|Q9NYF8-4|BCLF1_HUMAN Isoform 4 of Bcl-2-associate	536990000	483100000	1034700000	1057600000	248810000	250800000	1699100000	1729100000	1346800000	1588500000	1874900000	1935500000	976180000	935200000	1427700000	1379100000	1115400000	1093700000	1413300000	1518400000	1767500000	1770900000	1202900000	1160500000
Q9NYL9;H0YNJ8;H0YKU1;H0YNU8	Tropomodulin-3	TMOD3	>sp|Q9NYL9|TMOD3_HUMAN Tropomodulin-3 OS=Homo sapiens GN=TMOD3 PE=1 SV=1	30345000	28726000	34854000	31676000	12824000	13147000	27725000	29719000	21302000	21066000	25362000	24394000	22811000	19721000	26942000	24571000	20752000	22044000	42082000	43578000	44157000	33749000	34438000	29761000
Q9NZ01;Q9NZ01-2;M0R3C3	Trans-2,3-enoyl-CoA reductase	TECR	>sp|Q9NZ01|TECR_HUMAN Very-long-chain enoyl-CoA reductase OS=Homo sapiens GN=TECR PE=1 SV=1;>sp|Q9NZ01-2|TECR_HUMAN Isoform 2 of Very-long-chain enoyl-CoA reductase OS=Homo sapiens GN=TECR;>tr|M0R3C3|M0R3C3_HUMAN Very-long-chain enoyl-CoA reductase OS=Homo	10044000	6588500	4730300	3629800	6430100	5198700	6558500	2889100	4578500	1	2725400	3153500	7661100	5439200	8492500	12792000	5178500	6206400	4997900	5829200	4487700	3655400	3984100	8821700
Q9NZM5;M0QZ34;M0QYZ9;M0QZU5	Glioma tumor suppressor candidate region gene 2 protein	GLTSCR2	>sp|Q9NZM5|GSCR2_HUMAN Glioma tumor suppressor candidate region gene 2 protein OS=Homo sapiens GN=GLTSCR2 PE=1 SV=2;>tr|M0QZ34|M0QZ34_HUMAN Glioma tumor suppressor candidate region gene 2 protein (Fragment) OS=Homo sapiens GN=GLTSCR2 PE=2 SV=1;>tr|M0QYZ9|M	1	1	1	1	1	452690	1	1	1	1	1	1	1	1	1	1	1	1	1	1	1	1	1	1
Q9NZT1	Calmodulin-like protein 5	CALML5	>sp|Q9NZT1|CALL5_HUMAN Calmodulin-like protein 5 OS=Homo sapiens GN=CALML5 PE=1 SV=2	28218000	20241000	20672000	21514000	13545000	14860000	38937000	39969000	39617000	34449000	18332000	18115000	17115000	16600000	37971000	41627000	20645000	22860000	28747000	28467000	32752000	29237000	33342000	28105000
Q9P1Y5-2;Q9P1Y5	Calmodulin-regulated spectrin-associated protein 3	CAMSAP3	>sp|Q9P1Y5-2|CAMP3_HUMAN Isoform 2 of Calmodulin-regulated spectrin-associated protein 3 OS=Homo sapiens GN=CAMSAP3;>sp|Q9P1Y5|CAMP3_HUMAN Calmodulin-regulated spectrin-associated protein 3 OS=Homo sapiens GN=CAMSAP3 PE=1 SV=2	15161000	15977000	12583000	19009000	13883000	15028000	12055000	23319000	16594000	18556000	11341000	14231000	12414000	16188000	19911000	17148000	11001000	14770000	13387000	16051000	24417000	20530000	12724000	14450000
Q9P219	Protein Daple	CCDC88C	>sp|Q9P219|DAPLE_HUMAN Protein Daple OS=Homo sapiens GN=CCDC88C PE=1 SV=3	1	1	1	1	1	1	3942200	1	1	1	1	1	1	1	1	1	1	1	1	1	1	1	1	1
Q9P258	Protein RCC2	RCC2	>sp|Q9P258|RCC2_HUMAN Protein RCC2 OS=Homo sapiens GN=RCC2 PE=1 SV=2	1	1	1	1	1	6027700	1	1	1	1	1	1	1	1	5729400	5123500	1	1	1	1	3710300	1	1	1
Q9P270;D6RIF6;H0Y9L2	SLAIN motif-containing protein 2	SLAIN2	>sp|Q9P270|SLAI2_HUMAN SLAIN motif-containing protein 2 OS=Homo sapiens GN=SLAIN2 PE=1 SV=2;>tr|D6RIF6|D6RIF6_HUMAN SLAIN motif-containing protein 2 OS=Homo sapiens GN=SLAIN2 PE=2 SV=1	22580000	22575000	41043000	38438000	35308000	40894000	50547000	50249000	41279000	49276000	48024000	53750000	38338000	35071000	43436000	45055000	38595000	39190000	40017000	32122000	62854000	53086000	40913000	35772000
Q9P2E9;Q9P2E9-2;Q9P2E9-3;F8W7S5;Q8N4C6-7;Q8N4C6-10;Q8N4C6-5;Q8N4C6;Q8N4C6-2;Q8N4C6-9;C9J066;Q8N4C6-4;E9PN67;H9KV85;H0YDJ4;Q8N4C6-11;F8W6D3;Q8N4C6-6;A2A2S5	Ribosome-binding protein 1	RRBP1	>sp|Q9P2E9|RRBP1_HUMAN Ribosome-binding protein 1 OS=Homo sapiens GN=RRBP1 PE=1 SV=4;>sp|Q9P2E9-2|RRBP1_HUMAN Isoform 1 of Ribosome-binding protein 1 OS=Homo sapiens GN=RRBP1;>sp|Q9P2E9-3|RRBP1_HUMAN Isoform 2 of Ribosome-binding protein 1 OS=Homo sapiens	81766000	95662000	87417000	87805000	264010000	235050000	109040000	138490000	102660000	205780000	115680000	113260000	146790000	132000000	220320000	203280000	157410000	147550000	5272400	172090000	137050000	109430000	86708000	91902000
Q9P2R3-4;Q9P2R3-2;Q9P2R3;K7EPT2;I3L3P8	Ankyrin repeat and FYVE domain-containing protein 1	ANKFY1	>sp|Q9P2R3-4|ANFY1_HUMAN Isoform 4 of Ankyrin repeat and FYVE domain-containing protein 1 OS=Homo sapiens GN=ANKFY1;>sp|Q9P2R3-2|ANFY1_HUMAN Isoform 2 of Ankyrin repeat and FYVE domain-containing protein 1 OS=Homo sapiens GN=ANKFY1;>sp|Q9P2R3|ANFY1_HUMAN A	3966500	8336600	10882000	12044000	8847900	9481700	11293000	12964000	13450000	14273000	10769000	10038000	14589000	12100000	9225400	8049600	8826900	7922700	1	7007900	13819000	10841000	9740400	9646200
Q9UBQ5;B7ZAM9;K7ERF1;K7EMQ9;K7ES31;K7EQM4	Eukaryotic translation initiation factor 3 subunit K	EIF3K	>sp|Q9UBQ5|EIF3K_HUMAN Eukaryotic translation initiation factor 3 subunit K OS=Homo sapiens GN=EIF3K PE=1 SV=1;>tr|B7ZAM9|B7ZAM9_HUMAN Eukaryotic translation initiation factor 3 subunit K OS=Homo sapiens GN=EIF3K PE=2 SV=1;>tr|K7ERF1|K7ERF1_HUMAN Eukaryoti	38068000	35806000	48270000	46737000	39478000	32179000	33968000	33622000	28721000	30747000	33658000	26167000	22632000	20615000	29226000	26008000	17381000	20661000	10250000	15259000	22403000	24548000	17160000	22880000
Q9UH99-2;Q9UH99;J3KQE0	SUN domain-containing protein 2	SUN2	>sp|Q9UH99-2|SUN2_HUMAN Isoform 2 of SUN domain-containing protein 2 OS=Homo sapiens GN=SUN2;>sp|Q9UH99|SUN2_HUMAN SUN domain-containing protein 2 OS=Homo sapiens GN=SUN2 PE=1 SV=3;>tr|J3KQE0|J3KQE0_HUMAN SUN domain-containing protein 2 OS=Homo sapiens GN=	5432900	5794400	10281000	12374000	1	1	10090000	9694400	6707400	12629000	11195000	13467000	12402000	11661000	14972000	20606000	7624600	11617000	9716400	6720900	12474000	7560200	8169800	15684000
Q9UHB6;Q9UHB6-4;Q9UHB6-2;F8VQE1;F8VRN8;Q9UHB6-3;F8VS07;F8VTU2;F8VVQ7	LIM domain and actin-binding protein 1	LIMA1	>sp|Q9UHB6|LIMA1_HUMAN LIM domain and actin-binding protein 1 OS=Homo sapiens GN=LIMA1 PE=1 SV=1;>sp|Q9UHB6-4|LIMA1_HUMAN Isoform 4 of LIM domain and actin-binding protein 1 OS=Homo sapiens GN=LIMA1;>sp|Q9UHB6-2|LIMA1_HUMAN Isoform Alpha of LIM domain and	229060000	227100000	500320000	462110000	53284000	89670000	618400000	646640000	531150000	535700000	544520000	512430000	272670000	276250000	413250000	471490000	360510000	389870000	752580000	821460000	778450000	766430000	494930000	522730000
Q9UHB9;F5H5Y3;Q9UHB9-2;Q9UHB9-4;Q9UHB9-3	Signal recognition particle 68 kDa protein	SRP68	>sp|Q9UHB9|SRP68_HUMAN Signal recognition particle subunit SRP68 OS=Homo sapiens GN=SRP68 PE=1 SV=2;>tr|F5H5Y3|F5H5Y3_HUMAN Signal recognition particle subunit SRP68 OS=Homo sapiens GN=SRP68 PE=2 SV=1;>sp|Q9UHB9-2|SRP68_HUMAN Isoform 2 of Signal recognitio	22790000	41848000	2535700	4283400	16367000	18100000	1	1	1	1	5542300	5794900	13264000	9639600	1	1	12147000	10932000	20769000	4429200	1	1	4735800	1
Q9UHI6;B4DWV7	Probable ATP-dependent RNA helicase DDX20	DDX20	>sp|Q9UHI6|DDX20_HUMAN Probable ATP-dependent RNA helicase DDX20 OS=Homo sapiens GN=DDX20 PE=1 SV=2;>tr|B4DWV7|B4DWV7_HUMAN Probable ATP-dependent RNA helicase DDX20 OS=Homo sapiens GN=DDX20 PE=2 SV=1	1	969970	945660	654590	1	1086600	856940	860670	1	940550	1160900	909170	1143300	1587200	3107400	1834400	4534200	5314400	1081000	1041400	745360	1211900	1167800	1
Q9UHL4;R4GNE8;R4GMV4	Dipeptidyl peptidase 2	DPP7	>sp|Q9UHL4|DPP2_HUMAN Dipeptidyl peptidase 2 OS=Homo sapiens GN=DPP7 PE=1 SV=3;>tr|R4GNE8|R4GNE8_HUMAN Dipeptidyl peptidase 2 (Fragment) OS=Homo sapiens GN=DPP7 PE=4 SV=1;>tr|R4GMV4|R4GMV4_HUMAN Dipeptidyl peptidase 2 (Fragment) OS=Homo sapiens GN=DPP7 PE=	2112700	1	3140700	3337900	3221900	3442100	4346600	3905200	5956400	5901100	6759400	6634000	5507000	4819700	6175100	5270300	4127600	4030000	1	2196100	3475400	2629700	3525600	4857100
Q9UHX1;Q9UHX1-2;Q9UHX1-5;Q9UHX1-3;Q9UHX1-6;Q9UHX1-4;H0YEM1;E9PQ56;E9PN18;E9PMU7;H0YCP8;E9PL19	Poly(U)-binding-splicing factor PUF60	PUF60	>sp|Q9UHX1|PUF60_HUMAN Poly(U)-binding-splicing factor PUF60 OS=Homo sapiens GN=PUF60 PE=1 SV=1;>sp|Q9UHX1-2|PUF60_HUMAN Isoform 2 of Poly(U)-binding-splicing factor PUF60 OS=Homo sapiens GN=PUF60;>sp|Q9UHX1-5|PUF60_HUMAN Isoform 5 of Poly(U)-binding-splic	36346000	34548000	31693000	36968000	68494000	59255000	48765000	30820000	57317000	72774000	26831000	28646000	33778000	54487000	54798000	53838000	38328000	47681000	37397000	47479000	55973000	42576000	50782000	38172000
Q9UL46;H0YM70	Proteasome activator complex subunit 2	PSME2	>sp|Q9UL46|PSME2_HUMAN Proteasome activator complex subunit 2 OS=Homo sapiens GN=PSME2 PE=1 SV=4;>tr|H0YM70|H0YM70_HUMAN Proteasome activator complex subunit 2 OS=Homo sapiens GN=PSME2 PE=2 SV=1	1	3194700	1350500	1155800	884810	1	1	1	1	1	1	1	885050	1019900	1	1	1	1	1	1	1	1	1	1
Q9ULV4-3;Q9ULV4-2;Q9ULV4;B4E3S0;H0YHL7;F8VVB7;F8VTT6;F8VRE9;F8VSA4;F8VUX3;F8W1H8;F8VV53;Q6QEF8;Q6QEF8-5;J3KSS5;J3QLV6;Q6QEF8-2;Q6QEF8-3;Q6QEF8-4	Coronin-1C	CORO1C	>sp|Q9ULV4-3|COR1C_HUMAN Isoform 3 of Coronin-1C OS=Homo sapiens GN=CORO1C;>sp|Q9ULV4-2|COR1C_HUMAN Isoform 2 of Coronin-1C OS=Homo sapiens GN=CORO1C;>sp|Q9ULV4|COR1C_HUMAN Coronin-1C OS=Homo sapiens GN=CORO1C PE=1 SV=1;>tr|B4E3S0|B4E3S0_HUMAN Coronin OS=H	169020000	175230000	231840000	251000000	12389000	7926800	338990000	344120000	235960000	293150000	348850000	344920000	120560000	141910000	261810000	290720000	236650000	236590000	365780000	387490000	239120000	275980000	221440000	244330000
Q9ULX3;H3BUR4	RNA-binding protein NOB1	NOB1	>sp|Q9ULX3|NOB1_HUMAN RNA-binding protein NOB1 OS=Homo sapiens GN=NOB1 PE=1 SV=1;>tr|H3BUR4|H3BUR4_HUMAN RNA-binding protein NOB1 OS=Homo sapiens GN=NOB1 PE=2 SV=1	17604000	14531000	1	2491800	1664700	2270800	1	1	1	1904300	1339300	1590900	6346600	4245900	837580	1	1	1345500	1	1	1	1	1	1
Q9UN86;Q9UN86-2;D6RB17;D6RAC7	Ras GTPase-activating protein-binding protein 2	G3BP2	>sp|Q9UN86|G3BP2_HUMAN Ras GTPase-activating protein-binding protein 2 OS=Homo sapiens GN=G3BP2 PE=1 SV=2;>sp|Q9UN86-2|G3BP2_HUMAN Isoform B of Ras GTPase-activating protein-binding protein 2 OS=Homo sapiens GN=G3BP2;>tr|D6RB17|D6RB17_HUMAN Ras GTPase-acti	19676000	28248000	38311000	45925000	39258000	33891000	22064000	19728000	18742000	23860000	24758000	28297000	18258000	27483000	34753000	31994000	20709000	17960000	20517000	39429000	21449000	28945000	46217000	60248000
Q9UNM6-2;Q9UNM6;J3KNQ3;E9PL38;H0YD73	26S proteasome non-ATPase regulatory subunit 13	PSMD13	>sp|Q9UNM6-2|PSD13_HUMAN Isoform 2 of 26S proteasome non-ATPase regulatory subunit 13 OS=Homo sapiens GN=PSMD13;>sp|Q9UNM6|PSD13_HUMAN 26S proteasome non-ATPase regulatory subunit 13 OS=Homo sapiens GN=PSMD13 PE=1 SV=2;>tr|J3KNQ3|J3KNQ3_HUMAN 26S proteasom	44980000	48699000	14477000	20420000	26627000	7101000	8935900	63908000	71755000	3645000	12662000	115490000	41220000	38055000	40893000	5837300	2496000	1	2717400	151590000	32375000	5537200	73163000	70635000
Q9UNX3;E5RIT6;E5RHH1	60S ribosomal protein L26-like 1	RPL26L1	>sp|Q9UNX3|RL26L_HUMAN 60S ribosomal protein L26-like 1 OS=Homo sapiens GN=RPL26L1 PE=1 SV=1;>tr|E5RIT6|E5RIT6_HUMAN 60S ribosomal protein L26-like 1 (Fragment) OS=Homo sapiens GN=RPL26L1 PE=2 SV=1	6395900	16565000	451500	591520	1504900	550420	872640	604770	1842400	1513900	1	2235300	3036000	4441100	1	1516800	1	1316200	1	1622100	353970	2167200	1	1
Q9UPQ9;Q9UPQ9-1;H0Y720;Q9UPQ9-2	Trinucleotide repeat-containing gene 6B protein	TNRC6B	>sp|Q9UPQ9|TNR6B_HUMAN Trinucleotide repeat-containing gene 6B protein OS=Homo sapiens GN=TNRC6B PE=1 SV=4;>sp|Q9UPQ9-1|TNR6B_HUMAN Isoform 2 of Trinucleotide repeat-containing gene 6B protein OS=Homo sapiens GN=TNRC6B;>tr|H0Y720|H0Y720_HUMAN Trinucleotide	5043300	8486000	14364000	15383000	10762000	13731000	22179000	21989000	29594000	28198000	19780000	24473000	21010000	21528000	22693000	21080000	22714000	23263000	20622000	13270000	24389000	21002000	20989000	22393000
Q9UQ35;Q9UQ35-2;I3L4D8;I3L182;Q9UQ35-3;I3L1I8;I3L1C0;I3L0N7	Serine/arginine repetitive matrix protein 2	SRRM2	>sp|Q9UQ35|SRRM2_HUMAN Serine/arginine repetitive matrix protein 2 OS=Homo sapiens GN=SRRM2 PE=1 SV=2	19395000	22626000	30256000	32776000	50754000	48400000	37742000	36140000	47595000	35585000	37823000	37106000	46832000	40202000	66665000	66122000	62477000	63127000	44604000	44131000	47752000	48827000	31876000	33985000
Q9UQ80;F8VR77;F8W0A3;H0YIN7	Proliferation-associated protein 2G4	PA2G4	>sp|Q9UQ80|PA2G4_HUMAN Proliferation-associated protein 2G4 OS=Homo sapiens GN=PA2G4 PE=1 SV=3	89815000	109000000	18190000	19280000	12718000	5569000	1860600	2821700	1487800	1	5930800	1	16902000	21262000	10021000	9355200	7884000	7398300	1	1	2974400	1	1	1
Q9Y224	UPF0568 protein C14orf166	C14orf166	>sp|Q9Y224|CN166_HUMAN UPF0568 protein C14orf166 OS=Homo sapiens GN=C14orf166 PE=1 SV=1	6734500	4897900	5342300	4458400	3695100	1	1	1	1	1	1	1	7277700	6858600	1	1	1	1	1	1	1	1	1	1
Q9Y230;B3KQ59;M0R0Y3	RuvB-like 2	RUVBL2	>sp|Q9Y230|RUVB2_HUMAN RuvB-like 2 OS=Homo sapiens GN=RUVBL2 PE=1 SV=3;>tr|B3KQ59|B3KQ59_HUMAN RuvB-like 2 OS=Homo sapiens GN=RUVBL2 PE=2 SV=1;>tr|M0R0Y3|M0R0Y3_HUMAN RuvB-like 2 OS=Homo sapiens GN=RUVBL2 PE=2 SV=1	9929400	11553000	8929800	1	11868000	7129700	3735600	1	1	3770900	1	1	7993000	1	4557000	1	1	3148400	1	1	5275500	1	1	1
Q9Y266	Nuclear migration protein nudC	NUDC	>sp|Q9Y266|NUDC_HUMAN Nuclear migration protein nudC OS=Homo sapiens GN=NUDC PE=1 SV=1	1	1	3299600	2568700	2671000	2738500	1	1513500	1	1655300	1	1	2160100	1	1	1444400	1	1565300	1	1	1	1705200	1	1615200
Q9Y2H1;B4E3J8;F5H277;F5GY51;F5H7Z3;I3L0D0;H0YGN4;F5H0V1;F5H5E6	Serine/threonine-protein kinase 38-like	STK38L	>sp|Q9Y2H1|ST38L_HUMAN Serine/threonine-protein kinase 38-like OS=Homo sapiens GN=STK38L PE=1 SV=3;>tr|B4E3J8|B4E3J8_HUMAN Serine/threonine-protein kinase 38-like OS=Homo sapiens GN=STK38L PE=2 SV=1	179170000	207110000	229190000	224690000	116940000	128680000	218730000	245340000	218660000	201410000	249230000	228600000	172490000	151060000	194060000	174840000	189050000	149100000	240100000	212870000	268170000	238370000	174110000	186730000
Q9Y2Q9;H7C5V3;H0YAT2;E5RFH3;E5RK86;E5RGC7;E5RFT8	28S ribosomal protein S28, mitochondrial	MRPS28	>sp|Q9Y2Q9|RT28_HUMAN 28S ribosomal protein S28, mitochondrial OS=Homo sapiens GN=MRPS28 PE=1 SV=1;>tr|H7C5V3|H7C5V3_HUMAN 28S ribosomal protein S28, mitochondrial (Fragment) OS=Homo sapiens GN=MRPS28 PE=4 SV=1;>tr|H0YAT2|H0YAT2_HUMAN 28S ribosomal protein	1	11926000	4212600	2251900	5921800	1	1	1	1	2401700	1	2980900	5313100	1	5027400	2849400	2459700	1	1	1823500	2886000	1	2014900	1
Q9Y2W1	Thyroid hormone receptor-associated protein 3	THRAP3	>sp|Q9Y2W1|TR150_HUMAN Thyroid hormone receptor-associated protein 3 OS=Homo sapiens GN=THRAP3 PE=1 SV=2	649290000	619600000	1419000000	1388000000	325250000	317260000	2414700000	2394200000	2004000000	2149800000	2652000000	2808200000	1357800000	1402500000	1929100000	1994700000	1761900000	1836200000	2479100000	2136000000	2517300000	2355300000	1552000000	1492400000
Q9Y314;M0R3B2;M0R1K2;M0QX85	Nitric oxide synthase-interacting protein	NOSIP	>sp|Q9Y314|NOSIP_HUMAN Nitric oxide synthase-interacting protein OS=Homo sapiens GN=NOSIP PE=1 SV=1;>tr|M0R3B2|M0R3B2_HUMAN Nitric oxide synthase-interacting protein (Fragment) OS=Homo sapiens GN=NOSIP PE=2 SV=1;>tr|M0R1K2|M0R1K2_HUMAN Nitric oxide synthas	1	6514800	4990000	7657700	6924000	7099100	4164000	4704400	5882300	4908500	6520000	1	4474100	1	1	6639500	1	1	1	1	8086100	9958300	1	9671200
Q9Y383;Q96HJ9-2;Q9Y383-2;Q9Y383-3;Q9NQ29;Q9NQ29-3;Q9NQ29-2;A8MYV2;B8ZZ10;B8ZZ09;F8WEU3;B8ZZ12	Putative RNA-binding protein Luc7-like 2	LUC7L2	>sp|Q9Y383|LC7L2_HUMAN Putative RNA-binding protein Luc7-like 2 OS=Homo sapiens GN=LUC7L2 PE=1 SV=2;>sp|Q96HJ9-2|CG055_HUMAN Isoform 2 of UPF0562 protein C7orf55 OS=Homo sapiens GN=C7orf55;>sp|Q9Y383-2|LC7L2_HUMAN Isoform 2 of Putative RNA-binding protein	79188000	48166000	57622000	79533000	107940000	94519000	75226000	78239000	88932000	102490000	71657000	71238000	65107000	64571000	64248000	70509000	64763000	66183000	62439000	57870000	70203000	66291000	78869000	81426000
Q9Y3B4	Pre-mRNA branch site protein p14	SF3B14	>sp|Q9Y3B4|PM14_HUMAN Pre-mRNA branch site protein p14 OS=Homo sapiens GN=SF3B14 PE=1 SV=1	41155000	35395000	29166000	43630000	20268000	29988000	40710000	49859000	42831000	43686000	35377000	36763000	22058000	31418000	42060000	38837000	27822000	35664000	26468000	34553000	38817000	37844000	42642000	42980000
Q9Y3C1-2;Q9Y3C1;D6RIC3	Nucleolar protein 16	NOP16	>sp|Q9Y3C1-2|NOP16_HUMAN Isoform 2 of Nucleolar protein 16 OS=Homo sapiens GN=NOP16;>sp|Q9Y3C1|NOP16_HUMAN Nucleolar protein 16 OS=Homo sapiens GN=NOP16 PE=1 SV=2;>tr|D6RIC3|D6RIC3_HUMAN Nucleolar protein 16 OS=Homo sapiens GN=NOP16 PE=2 SV=1	12843000	21229000	1	1	1	1	1	1	1	1	4805900	4751100	3006700	5611600	1	1	1	1	1	3131500	1	1	1	1
Q9Y3D9;J3QLR8	28S ribosomal protein S23, mitochondrial	MRPS23	>sp|Q9Y3D9|RT23_HUMAN 28S ribosomal protein S23, mitochondrial OS=Homo sapiens GN=MRPS23 PE=1 SV=2;>tr|J3QLR8|J3QLR8_HUMAN 28S ribosomal protein S23, mitochondrial OS=Homo sapiens GN=MRPS23 PE=2 SV=1	12199000	16174000	1824900	4302600	7715900	8262300	2575900	3989800	1	1	3115500	3075000	4031300	1218000	2668600	5220900	1	4648500	1	1	3786300	5062500	1	1
Q9Y3I0	tRNA-splicing ligase RtcB homolog	C22orf28	>sp|Q9Y3I0|RTCB_HUMAN tRNA-splicing ligase RtcB homolog OS=Homo sapiens GN=RTCB PE=1 SV=1	6350100	6560300	8127400	1	1	1	4437300	5339800	5314900	4899100	5638400	1	15258000	13412000	3651000	5333900	1	1	1	3537600	5259700	6621200	2656500	6128800
Q9Y3U8;J3QSB5;J3KTD3	60S ribosomal protein L36	RPL36	>sp|Q9Y3U8|RL36_HUMAN 60S ribosomal protein L36 OS=Homo sapiens GN=RPL36 PE=1 SV=3;>tr|J3QSB5|J3QSB5_HUMAN 60S ribosomal protein L36 OS=Homo sapiens GN=RPL36 PE=2 SV=1	209690000	249230000	49788000	58161000	111630000	95577000	76137000	82920000	76754000	58004000	91622000	83888000	133790000	137630000	89569000	98186000	98865000	99199000	67351000	61617000	126740000	118620000	62284000	59055000
Q9Y421;K7EIY1;K7ENN5;Q9Y421-2;Q9Y421-3;K7ELZ8	Protein FAM32A	FAM32A	>sp|Q9Y421|FA32A_HUMAN Protein FAM32A OS=Homo sapiens GN=FAM32A PE=1 SV=2;>tr|K7EIY1|K7EIY1_HUMAN Protein FAM32A OS=Homo sapiens GN=FAM32A PE=2 SV=1;>tr|K7ENN5|K7ENN5_HUMAN Protein FAM32A OS=Homo sapiens GN=FAM32A PE=2 SV=1;>sp|Q9Y421-2|FA32A_HUMAN Isoform	5622600	8059300	7869600	10211000	9825900	13223000	18403000	20850000	24735000	18491000	15931000	13883000	9834800	10552000	18240000	15554000	11128000	13226000	27325000	23826000	25311000	22751000	26555000	20100000
Q9Y446	Plakophilin-3	PKP3	>sp|Q9Y446|PKP3_HUMAN Plakophilin-3 OS=Homo sapiens GN=PKP3 PE=1 SV=1	1	1	1	3382200	2427400	1789600	3141100	2285400	2473900	4265800	3054800	2927900	1	1	2617500	2246800	3828000	2416500	1	2161200	1	1592400	1	1
Q9Y4E5-4			>sp|Q9Y4E5-4|ZN451_HUMAN Isoform 3 of Zinc finger protein 451 OS=Homo sapiens GN=ZNF451	7999700	7060000	13933000	11740000	4246800	5754800	15072000	17834000	17276000	12562000	15210000	15738000	10168000	8550800	11644000	10351000	8920300	7740300	7397600	7180600	12968000	16184000	7821500	8485000
Q9Y4E8;E9PCQ3;Q9Y4E8-3;Q9Y4E8-2;Q9Y4E8-4;H0YI31;F8W0H4;F8VZG8;F8VVY7;Q13107;Q13107-2;H0YI26;P51784;G5E9A6;H7C189;H0YHM4;H0YH96	Ubiquitin carboxyl-terminal hydrolase 15;Ubiquitin carboxyl-terminal hydrolase	USP15	>sp|Q9Y4E8|UBP15_HUMAN Ubiquitin carboxyl-terminal hydrolase 15 OS=Homo sapiens GN=USP15 PE=1 SV=3;>tr|E9PCQ3|E9PCQ3_HUMAN Ubiquitin carboxyl-terminal hydrolase OS=Homo sapiens GN=USP15 PE=2 SV=2;>sp|Q9Y4E8-3|UBP15_HUMAN Isoform 3 of Ubiquitin carboxyl-ter	185590000	164540000	232920000	194760000	210510000	181410000	232000000	202860000	232810000	197400000	178670000	163240000	172480000	177550000	169860000	186610000	152120000	130460000	141440000	162440000	176040000	215850000	172320000	195680000
Q9Y4Z0;U3KQK1;M0QXB0	U6 snRNA-associated Sm-like protein LSm4	LSM4	>sp|Q9Y4Z0|LSM4_HUMAN U6 snRNA-associated Sm-like protein LSm4 OS=Homo sapiens GN=LSM4 PE=1 SV=1;>tr|U3KQK1|U3KQK1_HUMAN U6 snRNA-associated Sm-like protein LSm4 OS=Homo sapiens GN=LSM4 PE=4 SV=1;>tr|M0QXB0|M0QXB0_HUMAN U6 snRNA-associated Sm-like protein	481230000	542750000	690930000	635430000	948220000	987240000	1234800000	1309800000	977330000	825400000	1214900000	1232300000	554510000	397500000	898370000	923180000	767070000	757630000	1205500000	1215600000	1423600000	1327800000	964050000	927880000
Q9Y5B9;G3V2X0;G3V401;G3V5A4	FACT complex subunit SPT16	SUPT16H	>sp|Q9Y5B9|SP16H_HUMAN FACT complex subunit SPT16 OS=Homo sapiens GN=SUPT16H PE=1 SV=1	17643000	21596000	31474000	26241000	51308000	42339000	10733000	10590000	20029000	21259000	9804500	9958500	17402000	18736000	16131000	14519000	10807000	5888900	18014000	15744000	14191000	15490000	19905000	11679000
Q9Y617;Q9Y617-2	Phosphoserine aminotransferase	PSAT1	>sp|Q9Y617|SERC_HUMAN Phosphoserine aminotransferase OS=Homo sapiens GN=PSAT1 PE=1 SV=2;>sp|Q9Y617-2|SERC_HUMAN Isoform 2 of Phosphoserine aminotransferase OS=Homo sapiens GN=PSAT1	7470600	6160100	2212300	3188100	1890900	1324000	1	1	1	1	1	1	1470700	1017300	1	1	1	1	1	1	1	1	1	1
Q9Y657;Q99865;Q9BPZ2;Q56A73;Q5JZB7;Q5JZB8;Q5JUX0-2	Spindlin-1	SPIN1	>sp|Q9Y657|SPIN1_HUMAN Spindlin-1 OS=Homo sapiens GN=SPIN1 PE=1 SV=3	372460000	527420000	692910000	643510000	276170000	297240000	756970000	795650000	765440000	707530000	942410000	903890000	471150000	473000000	732580000	722520000	681840000	724140000	751190000	782660000	917160000	863700000	698090000	649200000
Q9Y6A5;C9JA91;E7EMT0;C9JWI7	Transforming acidic coiled-coil-containing protein 3	TACC3	>sp|Q9Y6A5|TACC3_HUMAN Transforming acidic coiled-coil-containing protein 3 OS=Homo sapiens GN=TACC3 PE=1 SV=1;>tr|C9JA91|C9JA91_HUMAN Transforming acidic coiled-coil-containing protein 3 (Fragment) OS=Homo sapiens GN=TACC3 PE=2 SV=1;>tr|E7EMT0|E7EMT0_HUMA	2745400	4710600	4748400	5874800	8433700	8892000	1	4565000	6409800	2900400	3394500	1	3050000	1	3022200	3536800	1	2929300	1	1	1	1	1	1
Q9Y6Y0;A8MVR0;H0Y5Y2	Influenza virus NS1A-binding protein	IVNS1ABP	>sp|Q9Y6Y0|NS1BP_HUMAN Influenza virus NS1A-binding protein OS=Homo sapiens GN=IVNS1ABP PE=1 SV=3	160800000	202840000	382900000	397690000	217680000	222480000	555590000	493770000	501630000	550200000	526880000	583930000	195190000	209990000	406520000	401160000	363090000	360570000	418590000	424540000	489440000	442770000	458020000	442820000

## Sheet: WT SPECIFIC
Protein IDs	Gene names	Average EV	Average WT	RATIO WT/EV	T.TEST
P01116-2;P01116;G3V5T7;G3V4K2	KRAS	2.57656e+08	7.24773e+09	28.1294	1.63335e-07
E7EX17;P23588;B4DS13;F8VX11;F8VP89;F8VSC7;F8W0K0;F8VYE9;F8VRU1;REV__E7EX17;REV__P23588;REV__B4DS13;REV__F8VX11	EIF4B	3.20825e+09	8.28272e+09	2.58169	0.000712034
G3V0I6	OTUD4	3418100000	8.15458e+09	2.38571	0.000131291
P52732;REV__Q58F21-2;REV__Q58F21-3;REV__Q58F21;REV__Q58F21-4;REV__Q58F21-5;REV__C9JJU3	KIF11	2395100000	5.51002e+09	2.30054	8.9502e-05
P84090;G3V279	ERH	1320680000	3.81997e+09	2.89242	7.48521e-06
P98175-2;P98175-4	RBM10	1427785000	2935900000	2.05626	0.00013447
F5H012;P19474;P19474-2;H0YDP8	TRIM21	1299125000	2.72362e+09	2.0965	4.59854e-05
Q9Y2W1	THRAP3	786400000	2.40382e+09	3.05674	4.67012e-05
P49354;E9PQP6;H0YE66;P49354-2;B3KVN2;H0YCW1;E9PPM9;E9PN85	FNTA	6.22208e+06	619795000	99.6121	5.45909e-07
Q9NYF8;Q9NYF8-2;Q9NYF8-4;H0YF14;B0AZU3	BCLAF1	602000000	1695650000	2.81669	8.17432e-05
P49356;H0YHI0;B4DL54;B4E1A0;B3KSC2	FNTB;CHURC1-FNTB	2.17665e+06	3.99707e+08	183.634	5.37353e-07
Q99417	MYCBP	6.26582e+08	1.45023e+09	2.31452	0.000149225
Q9BRS2	RIOK1	2.87828e+08	5.77527e+08	2.0065	0.00118134
Q9UHB6;Q9UHB6-4;Q9UHB6-2;F8VQE1;F8VRN8;Q9UHB6-3;F8VS07;F8VTU2;F8VVQ7	LIMA1	2.60257e+08	5.64807e+08	2.17019	0.00317831
Q9Y6Y0;A8MVR0;H0Y5Y2	IVNS1ABP	264065000	5.35333e+08	2.02728	9.29093e-05
O75688;O75688-4;C9JIR6;B8ZZF0;O75688-5;O75688-3	PPM1B	2.04838e+08	4.31572e+08	2.10689	2.36861e-06
Q9ULV4-3;Q9ULV4-2;Q9ULV4;B4E3S0;H0YHL7;F8VVB7;F8VTT6;F8VRE9;F8VSA4;F8VUX3;F8W1H8;F8VV53;Q6QEF8;Q6QEF8-5;J3KSS5;J3QLV6;Q6QEF8-2;Q6QEF8-3;Q6QEF8-4	CORO1C	141234300	317665000	2.24921	0.00383641
P01111	NRAS	1	4.07915e+07	4.07915e+07	0.00197618
Q8TF72	SHROOM3	5.93706e+07	137037000	2.30816	0.00623301
Q03135;E9PCT5;Q03135-2;C9JKI3;P56539	CAV1	2.11948e+07	5.47072e+07	2.58116	4.66964e-07
P62304;A6NHK2	SNRPE	1.89175e+07	5.75972e+07	3.04465	0.00730302
Q96I25;Q5W010;Q5W011;Q5W012;H0Y6J6	RBM17	2.95942e+07	6.78022e+07	2.29107	6.11901e-06
P52306-5;P52306-4;P52306-3;P52306-6;D6REZ0;H0Y8M2;D6RC85	RAP1GDS1	609701	1.25676e+07	20.6128	0.000325186
Q9NQ92;H9KV77;J3QRX4;J3QRX9;J3QRX6	COPR5;C17orf79	25727500	55439500	2.15487	0.000146026
Q9NXE8;B4DJK2;Q9NXE8-2;B4DZL1;J3QLP6	CWC25	2.23959e+07	5.20557e+07	2.32434	0.000516334
Q14681	KCTD2	15850700	4.92083e+07	3.10449	4.99376e-05
Q8TA86;C9J6V2	RP9	8714700	31277500	3.58905	2.34332e-06
E7EQZ4;Q16637;Q16637-3;Q16637-2;Q16637-4;B4DP61;H0YBZ9	SMN1	5.16052e+06	12601900	2.44198	0.00198401
Q01804;Q01804-3;D6RI06;Q01804-2;Q7RTX8;Q01804-4;D6RA27	OTUD4	1.67827e+07	3.44082e+07	2.05022	0.00108225
Q9UPQ9;Q9UPQ9-1;H0Y720;Q9UPQ9-2	TNRC6B	1.12949e+07	2.43688e+07	2.15751	0.000174675
P27361;P27361-3;E9PQW4;P27361-2;E9PBK7;B3KR49;E9PJF0;E9PRH7;H0YEX6;H0YDH9	MAPK3	5.3405e+06	2.09988e+07	3.932	0.00289738
Q9Y421;K7EIY1;K7ENN5;Q9Y421-2;Q9Y421-3;K7ELZ8	FAM32A	9.13523e+06	18715500	2.04872	0.000457955
Q7RTV0	PHF5A	6.62428e+06	2.35617e+07	3.55686	0.00025887
Q3ZCM7;Q5SQY0;F5H0I4	TUBB8;RP11-631M21.2	1	1.63867e+07	1.63867e+07	0.000813224
Q8N5Z5;Q8N5Z5-2;H0Y731	KCTD17	6.22973e+06	18433000	2.95887	5.5558e-05
Q02818;H7BZI1;C9JKZ2;C9J3C1;C9JBD3	NUCB1	5188317	11063500	2.13239	0.00896985
O95425;O95425-2;F5H2Q5;F5GXV0	SVIL	5.54493e+06	15707500	2.83277	0.000485808
Q96DG6	CMBL	1.71417e+06	10009900	5.83951	0.000782027
Q6P3W7;F8VSC5;F8VPW3	SCYL2	3.14738e+06	1.09918e+07	3.49237	0.00228793
Q9UHL4;R4GNE8;R4GMV4	DPP7	2.54255e+06	5.58378e+06	2.19613	0.00192848
J3KQN4;H0Y5B4;H7BZ11;P83881;R4GN19;H0Y3V9;H7BY91	RPL36A	1375955	9.19542e+06	6.68293	0.00171055

## Sheet: G13D SPECIFIC
Protein IDs	Gene names	Average EV	Average G13D	RATIO G13D/EV	T.TEST
P01116-2;P01116;G3V5T7;G3V4K2	KRAS	2.57656e+08	32442500000	125.914	2.19656e-05
E7EX17;P23588;B4DS13;F8VX11;F8VP89;F8VSC7;F8W0K0;F8VYE9;F8VRU1;REV__E7EX17;REV__P23588;REV__B4DS13;REV__F8VX11	EIF4B	3.20825e+09	7.44437e+09	2.32038	0.00387855
Q9Y2W1	THRAP3	786400000	1713700000	2.17917	0.00249517
P49354;E9PQP6;H0YE66;P49354-2;B3KVN2;H0YCW1;E9PPM9;E9PN85	FNTA	6.22208e+06	1.59968e+09	257.098	7.88195e-08
P49356;H0YHI0;B4DL54;B4E1A0;B3KSC2	FNTB;CHURC1-FNTB	2.17665e+06	1018730000	468.026	6.06776e-08
Q13671;Q13671-2;E9PNR2;E7EM96;E9PMB8	RIN1	428052	5.22073e+08	1219.65	8.33033e-07
P01111	NRAS	1	2.07982e+08	2.07982e+08	0.00862591
P04049;P04049-2;B4E0X2;H7C155;B4E1N6;P10398;H7C560;H7C4S5	RAF1	5.73493e+06	1.49894e+08	26.1371	8.78297e-06
Q03135;E9PCT5;Q03135-2;C9JKI3;P56539	CAV1	2.11948e+07	1.05778e+08	4.99074	1.44243e-06
Q96JH8;Q96JH8-1;B7Z2I1;F5H6X3;F8WEM1;C9J7G0;Q96JH8-2;Q96JH8-3	RADIL	8.70417e+06	1.1156e+08	12.8169	0.000187675
P01859	IGHG2	51090000	187741000	3.67471	0.00311547
P52306-5;P52306-4;P52306-3;P52306-6;D6REZ0;H0Y8M2;D6RC85	RAP1GDS1	609701	6.04718e+07	99.1828	1.10621e-05
P15056;H7C5K3	BRAF	9.1707e+06	27982500	3.05129	0.0022416
P04844;P04844-2;Q5JYR7;Q5JYR4;F2Z3K5	RPN2	1.53716e+06	2.52573e+07	16.4312	0.00111812
Q8TA86;C9J6V2	RP9	8714700	2.68178e+07	3.07731	1.95147e-05
E7EQZ4;Q16637;Q16637-3;Q16637-2;Q16637-4;B4DP61;H0YBZ9	SMN1	5.16052e+06	3.04587e+07	5.90225	6.44445e-05
P27361;P27361-3;E9PQW4;P27361-2;E9PBK7;B3KR49;E9PJF0;E9PRH7;H0YEX6;H0YDH9	MAPK3	5.3405e+06	20289000	3.79908	0.00224871
Q9NX95;Q9NX95-3;Q9NX95-4;Q9NX95-2;Q9NX95-5;B7Z4D2;B3KRD1;E9PL50;E9PNN9;E9PL66;E9PN31;E9PLB9;E9PQG2;E9PRH8;E9PI48;E9PJ11;E9PPC2	SYBU	5322790	1.43098e+07	2.68841	0.0011141
Q6NZI2;Q6NZI2-2;Q6NZI2-3	PTRF	1.40115e+06	7.70078e+06	5.49604	0.00474874
P27105;B4E2V5;P27105-2	STOM	1	4.83682e+06	4.83682e+06	0.000191099
J3KQN4;H0Y5B4;H7BZ11;P83881;R4GN19;H0Y3V9;H7BY91	RPL36A	1375955	7.02588e+06	5.10619	0.000955118
Q9UHI6;B4DWV7	DDX20	609470	2920150	4.79129	0.00958867

## Sheet: G12V SPECIFIC
Protein IDs	Gene names	Average EV	Average G12V	RATIO G12V/EV	T.TEST
P01116-2;P01116;G3V5T7;G3V4K2	KRAS	2.57656e+08	5271600000	20.4598	5.2988e-08
O14744;O14744-2;G3V5W5;B4DX49;B4DV00;A8MTP3;H0YJX6;G3V580;G3V5L5;G3V2X6;C9JSX3;G3V2L6;H7BZ44;H0YJD3;H0YJ77;G3V5T6;G3V2F5;H0YJY6;G3V507	PRMT5	7.18523e+09	14798500000	2.05957	9.83602e-05
E7EX17;P23588;B4DS13;F8VX11;F8VP89;F8VSC7;F8W0K0;F8VYE9;F8VRU1;REV__E7EX17;REV__P23588;REV__B4DS13;REV__F8VX11	EIF4B	3.20825e+09	8.15792e+09	2.54279	0.000916687
G3V0I6	OTUD4	3418100000	8.19437e+09	2.39735	0.000379861
Q9BQA1;B4DP38;H0Y711	WDR77	3.70097e+09	7.83038e+09	2.11577	7.40675e-06
P52732;REV__Q58F21-2;REV__Q58F21-3;REV__Q58F21;REV__Q58F21-4;REV__Q58F21-5;REV__C9JJU3	KIF11	2395100000	5.65968e+09	2.36303	0.00033946
P84090;G3V279	ERH	1320680000	2.96397e+09	2.24427	0.000338462
Q9Y2W1	THRAP3	786400000	2.08868e+09	2.65601	0.000830278
P49354;E9PQP6;H0YE66;P49354-2;B3KVN2;H0YCW1;E9PPM9;E9PN85	FNTA	6.22208e+06	6.81738e+08	109.568	8.7908e-07
Q9NYF8;Q9NYF8-2;Q9NYF8-4;H0YF14;B0AZU3	BCLAF1	602000000	1472250000	2.4456	0.000796943
P49356;H0YHI0;B4DL54;B4E1A0;B3KSC2	FNTB;CHURC1-FNTB	2.17665e+06	4.11693e+08	189.141	1.88991e-07
Q13671;Q13671-2;E9PNR2;E7EM96;E9PMB8	RIN1	428052	1.68471e+07	39.3575	0.00571873
Q9UHB6;Q9UHB6-4;Q9UHB6-2;F8VQE1;F8VRN8;Q9UHB6-3;F8VS07;F8VTU2;F8VVQ7	LIMA1	2.60257e+08	689430000	2.64903	0.00114901
O75688;O75688-4;C9JIR6;B8ZZF0;O75688-5;O75688-3	PPM1B	2.04838e+08	4.31528e+08	2.10668	5.95276e-05
P01111	NRAS	1	4.43663e+07	4.43663e+07	1.27891e-07
Q86VP6;Q86VP6-2;H0YH27;Q86VP6-3	CAND1	2.25902e+06	65505000	28.997	0.00943485
Q03135;E9PCT5;Q03135-2;C9JKI3;P56539	CAV1	2.11948e+07	5.91532e+07	2.79092	2.82897e-07
Q9NXV2;H3BSS5	KCTD5	6.21072e+07	349055000	5.6202	0.00784247
Q14764;H3BQK6;H3BRL2;H3BNF6;H3BUK7;H3BP76;H3BQE7;H3BUP3;H3BNF2;H3BPZ2	MVP	95362000	2.10597e+08	2.20839	0.00499273
Q5VX20;Q16875;Q16875-2;Q5W015;F2Z2I2;B7Z955;Q16875-3;H0Y483;F5H5L1;Q16877;Q66S35;B7Z5C3;Q64EX5;Q5XLC2;Q4VBA9;Q9H178	PFKFB3	4.43317e+07	89044500	2.0086	0.00177129
Q15459;E9PAW1;H7C1L2;F8WB66;F8WC79	SF3A1	4.11352e+07	123153000	2.99386	0.00588217
Q96I25;Q5W010;Q5W011;Q5W012;H0Y6J6	RBM17	2.95942e+07	6.45162e+07	2.18003	0.00239961
C9JA08;Q96D46;C9J0B9;C9K0C2;C9IZW9;C9IY70	NMD3	1.29695e+06	3.67968e+07	28.3718	0.00086436
Q9NXE8;B4DJK2;Q9NXE8-2;B4DZL1;J3QLP6	CWC25	2.23959e+07	65043000	2.90423	5.08662e-06
P04844;P04844-2;Q5JYR7;Q5JYR4;F2Z3K5	RPN2	1.53716e+06	2.83383e+07	18.4355	0.00806087
Q14681	KCTD2	15850700	4.34023e+07	2.7382	0.00623822
Q8TA86;C9J6V2	RP9	8714700	3.28108e+07	3.765	7.87524e-06
E7EQZ4;Q16637;Q16637-3;Q16637-2;Q16637-4;B4DP61;H0YBZ9	SMN1	5.16052e+06	1.16992e+07	2.26707	0.00165423
Q07283	TCHH	7.541e+06	2.34203e+07	3.10573	0.00196175
P27361;P27361-3;E9PQW4;P27361-2;E9PBK7;B3KR49;E9PJF0;E9PRH7;H0YEX6;H0YDH9	MAPK3	5.3405e+06	19489000	3.64928	0.00246141
Q9Y421;K7EIY1;K7ENN5;Q9Y421-2;Q9Y421-3;K7ELZ8	FAM32A	9.13523e+06	2.43113e+07	2.66127	1.57579e-06
Q9NX95;Q9NX95-3;Q9NX95-4;Q9NX95-2;Q9NX95-5;B7Z4D2;B3KRD1;E9PL50;E9PNN9;E9PL66;E9PN31;E9PLB9;E9PQG2;E9PRH8;E9PI48;E9PJ11;E9PPC2	SYBU	5322790	1.25351e+07	2.35498	0.00298551
Q7RTV0	PHF5A	6.62428e+06	1.97538e+07	2.98203	0.00130332
O60825;B0FLL2;O60825-2;B4DY91;B4DI16;P16118;B4DUN5	PFKFB2	7.10878e+06	16323500	2.29624	0.00419889
Q8N5Z5;Q8N5Z5-2;H0Y731	KCTD17	6.22973e+06	18656900	2.99482	0.00803764
Q02818;H7BZI1;C9JKZ2;C9J3C1;C9JBD3	NUCB1	5188317	1.31652e+07	2.53746	0.0045317
O95425;O95425-2;F5H2Q5;F5GXV0	SVIL	5.54493e+06	1.56083e+07	2.81488	0.00143427
Q6P3W7;F8VSC5;F8VPW3	SCYL2	3.14738e+06	1.14762e+07	3.64626	0.00355658
P01040;C9J0E4	CSTA	1.63025e+06	4.24648e+06	2.6048	0.00788599
J3KQN4;H0Y5B4;H7BZ11;P83881;R4GN19;H0Y3V9;H7BY91	RPL36A	1375955	8446300	6.1385	6.13598e-06
P29400-2;P29400;P02462;P02462-2	COL4A5;COL4A1	1	6.45153e+06	6.45153e+06	0.00245917

## Sheet: DIF WT VS G12V
Protein IDs	Gene names	FOLD WT/G12V	T.TEST
P27105;B4E2V5;P27105-2	STOM	765252	0.0146227
Q3ZCM7;Q5SQY0;F5H0I4	TUBB8;RP11-631M21.2	4.69868	0.0255101
Q9UHL4;R4GNE8;R4GMV4	DPP7	2.00809	0.00689209
Q96JH8;Q96JH8-1;B7Z2I1;F5H6X3;F8WEM1;C9J7G0;Q96JH8-2;Q96JH8-3	RADIL	4.45636e-07	0.0498474

## Sheet: NORMALISED LFQ INTENSITIES
Protein IDs	Gene names	LFQ intensity EV 1	LFQ intensity EV 1_1	LFQ intensity EV 2	LFQ intensity EV 2_1	LFQ intensity EV 3	LFQ intensity EV 3_1	Normalised LFQ intensity WT 1	Normalised LFQ intensity WT 1_1	Normalised LFQ intensity WT 2	Normalised LFQ intensity WT 2_1	Normalised LFQ intensity WT 3	Normalised LFQ intensity WT 3_1	LFQ intensity G13D 1	LFQ intensity G13D 1_1	LFQ intensity G13D 2	LFQ intensity G13D 2_1	LFQ intensity G13D 3	LFQ intensity G13D 3_1	Normalised LFQ intensity G12V 1	Normalised LFQ intensity G12V 1_1	Normalised LFQ intensity G12V 2	Normalised LFQ intensity G12V 2_1	Normalised LFQ intensity G12V 3	Normalised LFQ intensity G12V 3_1
P01116-2;P01116;G3V5T7;G3V4K2	KRAS	810830000	713690000	3140800	9929600	2814600	5533800	3.79204e+10	4.04418e+10	2.7027e+10	2.62061e+10	3.08112e+10	3.22485e+10	22080000000	20591000000	29085000000	34157000000	46939000000	41803000000	3.4866e+10	3.25484e+10	3.40678e+10	3.89543e+10	2.62372e+10	2.79813e+10
E7EX17;P23588;B4DS13;F8VX11;F8VP89;F8VSC7;F8W0K0;F8VYE9;F8VRU1;REV__E7EX17;REV__P23588;REV__B4DS13;REV__F8VX11	EIF4B	687010000	655810000	5701600000	6167000000	2949100000	3089000000	3.3582e+10	3.31254e+10	3.20431e+10	4.2632e+10	3.97095e+10	4.13599e+10	5710600000	5938100000	8864600000	9281400000	7444400000	7427100000	4.5791e+10	3.94614e+10	5.62463e+10	5.68599e+10	5.41305e+10	4.87438e+10
G3V0I6	OTUD4	3000300000	2439100000	5605600000	5804900000	1814400000	1844300000	3.60175e+10	3.64602e+10	3.23631e+10	3.49146e+10	3.90363e+10	4.02189e+10	5840400000	5168400000	7202400000	7322500000	6122800000	5918000000	4.74415e+10	4.61307e+10	6.07137e+10	6.01844e+10	4.54642e+10	4.26443e+10
P52732;REV__Q58F21-2;REV__Q58F21-3;REV__Q58F21;REV__Q58F21-4;REV__Q58F21-5;REV__C9JJU3	KIF11	2193800000	2310300000	3724900000	3810900000	1180400000	1150300000	2.61738e+10	2.6745e+10	2.36273e+10	2.38816e+10	2.39863e+10	2.35705e+10	1999400000	1965700000	3136800000	3179700000	3666000000	3678900000	3.38481e+10	3.54778e+10	4.21311e+10	4.06048e+10	2.84133e+10	2.851e+10
P84090;G3V279	ERH	1208300000	1553600000	1893200000	2195000000	512560000	561420000	1.6772e+10	1.77876e+10	1.67299e+10	1.5486e+10	1.83798e+10	1.74389e+10	1830800000	1665100000	2824800000	2631100000	2336300000	2386700000	1.78847e+10	2.05403e+10	1.76829e+10	1.93002e+10	1.49978e+10	1.90393e+10
P98175-2;P98175-4	RBM10	1310400000	1314500000	2120800000	2096400000	857090000	867520000	1.37644e+10	1.42098e+10	1.14189e+10	1.21261e+10	1.39291e+10	1.34023e+10	1497300000	1588800000	2529900000	2624000000	2451000000	2355600000	1.57954e+10	1.62963e+10	1.80644e+10	1.82472e+10	1.30574e+10	1.30851e+10
F5H012;P19474;P19474-2;H0YDP8	TRIM21	1093700000	1184900000	1867700000	1932000000	839170000	877280000	1.202e+10	1.31431e+10	1.10948e+10	1.17796e+10	1.22393e+10	1.28723e+10	1511700000	1546800000	2513900000	2460800000	2333100000	2338200000	1.37965e+10	1.54015e+10	1.47719e+10	1.3842e+10	1.26389e+10	1.24875e+10
Q9Y2W1	THRAP3	649290000	619600000	1419000000	1388000000	325250000	317260000	1.08087e+10	1.0717e+10	8.97036e+09	9.62299e+09	1.1871e+10	1.25701e+10	1357800000	1402500000	1929100000	1994700000	1761900000	1836200000	1.52569e+10	1.31454e+10	1.5492e+10	1.4495e+10	9.55132e+09	9.18453e+09
P49354;E9PQP6;H0YE66;P49354-2;B3KVN2;H0YCW1;E9PPM9;E9PN85	FNTA	5097700	23939000	1314200	2891700	4089900	1	3.56724e+09	3.43895e+09	2.37782e+09	2.10629e+09	2.71385e+09	2.44192e+09	1358200000	1169100000	1921800000	1625600000	1753000000	1770400000	5.27058e+09	4.74144e+09	4.38702e+09	4.73184e+09	2.95697e+09	3.08547e+09
Q9NYF8;Q9NYF8-2;Q9NYF8-4;H0YF14;B0AZU3	BCLAF1	536990000	483100000	1034700000	1057600000	248810000	250800000	7.60556e+09	7.73984e+09	6.02858e+09	7.11049e+09	8.39248e+09	8.66374e+09	976180000	935200000	1427700000	1379100000	1115400000	1093700000	8.69774e+09	9.34454e+09	1.08776e+10	1.08985e+10	7.40289e+09	7.14195e+09
P49356;H0YHI0;B4DL54;B4E1A0;B3KSC2	FNTB;CHURC1-FNTB	6809700	4657300	1	1	1592900	1	2.30812e+09	2.21524e+09	1.75835e+09	1.53109e+09	1.55298e+09	1.36928e+09	781920000	836660000	1212100000	1030800000	1175400000	1075500000	2.88958e+09	2.8257e+09	2.93131e+09	2.74077e+09	1.84755e+09	1.96695e+09
Q99417	MYCBP	517510000	443260000	927690000	1100000000	403440000	367590000	6.24837e+09	6.24881e+09	5.56977e+09	6.49321e+09	7.47888e+09	6.9104e+09	779090000	910290000	1104500000	1197300000	990560000	1001600000	5.97653e+09	7.34935e+09	8.01585e+09	9.16361e+09	6.04564e+09	6.84471e+09
Q9BRS2	RIOK1	215280000	238190000	437930000	526950000	145280000	163340000	2.62325e+09	2.6993e+09	2.51864e+09	2.44872e+09	2.66765e+09	2.55328e+09	363990000	342810000	464380000	459240000	384430000	419690000	2.86977e+09	2.78995e+09	3.97131e+09	3.99149e+09	2.85358e+09	2.7409e+09
Q9UHB6;Q9UHB6-4;Q9UHB6-2;F8VQE1;F8VRN8;Q9UHB6-3;F8VS07;F8VTU2;F8VVQ7	LIMA1	229060000	227100000	500320000	462110000	53284000	89670000	2.7681e+09	2.89451e+09	2.37755e+09	2.39791e+09	2.4374e+09	2.29375e+09	272670000	276250000	413250000	471490000	360510000	389870000	4.63153e+09	5.05543e+09	4.79074e+09	4.71677e+09	3.0459e+09	3.21699e+09
Q9Y6Y0;A8MVR0;H0Y5Y2	IVNS1ABP	160800000	202840000	382900000	397690000	217680000	222480000	2.48695e+09	2.21023e+09	2.24541e+09	2.46282e+09	2.35843e+09	2.6138e+09	195190000	209990000	406520000	401160000	363090000	360570000	2.57609e+09	2.61271e+09	3.01211e+09	2.7249e+09	2.81875e+09	2.7252e+09
O75688;O75688-4;C9JIR6;B8ZZF0;O75688-5;O75688-3	PPM1B	183290000	141350000	264070000	276530000	176260000	187530000	2.03937e+09	2.07281e+09	1.82227e+09	1.90665e+09	1.85311e+09	1.89667e+09	249500000	300720000	338120000	409770000	388100000	368680000	2.75942e+09	2.81069e+09	2.97747e+09	3.06202e+09	2.12105e+09	2.20364e+09
Q9ULV4-3;Q9ULV4-2;Q9ULV4;B4E3S0;H0YHL7;F8VVB7;F8VTT6;F8VRE9;F8VSA4;F8VUX3;F8W1H8;F8VV53;Q6QEF8;Q6QEF8-5;J3KSS5;J3QLV6;Q6QEF8-2;Q6QEF8-3;Q6QEF8-4	CORO1C	169020000	175230000	231840000	251000000	12389000	7926800	1.5174e+09	1.54036e+09	1.05621e+09	1.31221e+09	1.56153e+09	1.54394e+09	120560000	141910000	261810000	290720000	236650000	236590000	2.25108e+09	2.38469e+09	1.47159e+09	1.69844e+09	1.36279e+09	1.50366e+09
P01111	NRAS	1	1	1	1	1	1	4.47623	3.15404e+08	1.2977e+08	1.96694e+08	2.357e+08	2.17983e+08	32415000	61238000	231920000	213030000	469530000	239760000	2.51812e+08	3.52593e+08	2.48784e+08	3.20376e+08	2.24641e+08	2.40032e+08
Q8TF72	SHROOM3	3239500	3098900	88863000	85014000	89843000	86165000	6.86788e+08	7.51379e+08	3.91858e+08	4.51472e+08	6.95427e+08	7.03529e+08	45365000	45154000	160480000	159310000	88123000	72794000	6.66623e+08	6.13002e+08	1.46507e+09	1.08529e+09	4.57719e+08	6.1542
Q03135;E9PCT5;Q03135-2;C9JKI3;P56539	CAV1	22548000	23413000	26978000	23180000	17468000	13582000	2.11564e+08	2.43502e+08	2.75601e+08	2.63753e+08	2.24496e+08	2.50373e+08	93150000	75260000	125380000	99207000	118220000	123450000	3.29435e+08	3.96171e+08	4.16129e+08	3.3901e+08	3.2909e+08	3.74409e+08
P62304;A6NHK2	SNRPE	49558000	32492000	5466000	6002100	1	19987000	2.04693e+08	2.31707e+08	4.30394e+08	1.58315e+08	2.64317e+08	2.57482e+08	51311000	47766000	77573000	42295000	28661000	30803000	2.00892e+08	2.00707e+08	2.93746e+08	2.27706e+08	2.36321e+08	2.0728e+08
Q96I25;Q5W010;Q5W011;Q5W012;H0Y6J6	RBM17	23286000	19313000	37078000	40452000	33951000	23485000	3.09097e+08	2.75798e+08	2.75118e+08	2.9279e+08	3.15323e+08	3.52861e+08	50958000	44152000	65259000	59675000	54395000	50271000	3.85469e+08	3.56242e+08	5.25581e+08	5.55448e+08	2.7049e+08	2.89044e+08
P52306-5;P52306-4;P52306-3;P52306-6;D6REZ0;H0Y8M2;D6RC85	RAP1GDS1	1	3658200	1	1	1	1	8.43635e+07	8.34861e+07	3.44401e+07	5.05814e+07	2.89912e+07	5.56708e+07	35673000	40270000	63706000	70162000	77722000	75298000	3.14492e+07	6.1542	6.56469e+07	9.22515e+07	4.75695e+07	3.06627e+07
Q9NQ92;H9KV77;J3QRX4;J3QRX9;J3QRX6	COPR5;C17orf79	24854000	22635000	42179000	35868000	15590000	13239000	2.66273e+08	2.62199e+08	2.11726e+08	2.34228e+08	2.53525e+08	2.61009e+08	24009000	29950000	45140000	47613000	43348000	43087000	2.7113e+08	2.40389e+08	3.21723e+08	3.20216e+08	2.03513e+08	1.87599e+08
Q9NXE8;B4DJK2;Q9NXE8-2;B4DZL1;J3QLP6	CWC25	9770500	16752000	34647000	35245000	17557000	20404000	1.82165e+08	2.09966e+08	2.50078e+08	3.13748e+08	2.23923e+08	2.18198e+08	35455000	29421000	36631000	37329000	46356000	34864000	3.57799e+08	4.63541e+08	4.06128e+08	4.04947e+08	3.76133e+08	3.9318e+08
Q14681	KCTD2	15980000	17593000	24281000	27463000	5206400	4580800	2.56031e+08	2.64639e+08	2.08646e+08	2.1758e+08	1.93968e+08	1.80741e+08	16407000	16040000	30910000	27698000	31907000	29965000	2.22918e+08	2.47159e+08	4.10264e+08	3.83475e+08	1.7273e+08	1.66096e+08
Q8TA86;C9J6V2	RP9	5357700	6604200	14063000	13527000	6284200	6452100	1.38553e+08	1.29197e+08	1.37845e+08	1.7528e+08	1.20276e+08	1.38879e+08	20259000	22695000	30135000	30851000	29259000	27708000	1.84706e+08	1.65893e+08	2.32013e+08	2.55098e+08	2.0504e+08	1.68797e+08
E7EQZ4;Q16637;Q16637-3;Q16637-2;Q16637-4;B4DP61;H0YBZ9	SMN1	4848000	1	7365800	7861900	5129400	5758000	5.33566e+07	4.96503e+07	3.93971e+07	4.81642e+07	8.16956e+07	6.619e+07	21937000	21360000	28788000	38627000	28241000	43799000	6.47915e+07	6.1819e+07	8.59865e+07	9.12238e+07	5.10454e+07	7.71306e+07
Q01804;Q01804-3;D6RI06;Q01804-2;Q7RTX8;Q01804-4;D6RA27	OTUD4	18909000	19234000	24317000	24552000	8326600	5357400	1.40616e+08	1.51995e+08	1.47935e+08	1.26744e+08	1.91005e+08	1.65817e+08	18794000	14529000	28560000	25877000	23409000	18747000	1.38697e+08	1.69899e+08	2.08277e+08	2.33927e+08	1.54557e+08	1.9683e+08
Q9UPQ9;Q9UPQ9-1;H0Y720;Q9UPQ9-2	TNRC6B	5043300	8486000	14364000	15383000	10762000	13731000	9.92782e+07	9.84278e+07	1.32469e+08	1.26221e+08	8.85398e+07	1.09547e+08	21010000	21528000	22693000	21080000	22714000	23263000	1.26912e+08	8.16663e+07	1.50095e+08	1.29251e+08	1.29171e+08	1.37811e+08
P27361;P27361-3;E9PQW4;P27361-2;E9PBK7;B3KR49;E9PJF0;E9PRH7;H0YEX6;H0YDH9	MAPK3	1	15883000	1	1	1	16160000	9.73042e+07	9.48289e+07	6.65078e+07	6.82401e+07	1.26583e+08	1.10509e+08	17498000	17551000	18996000	18102000	24832000	24755000	1.11059e+08	9.77226e+07	1.34931e+08	1.36106e+08	1.26721e+08	1.13096e+08
Q9Y421;K7EIY1;K7ENN5;Q9Y421-2;Q9Y421-3;K7ELZ8	FAM32A	5622600	8059300	7869600	10211000	9825900	13223000	8.2376e+07	9.33293e+07	1.10719e+08	8.27699e+07	7.13108e+07	6.21435e+07	9834800	10552000	18240000	15554000	11128000	13226000	1.68164e+08	1.4663e+08	1.55769e+08	1.40014e+08	1.63425e+08	1.23699e+08
Q7RTV0	PHF5A	2803600	1234600	10841000	10309000	6274300	8283200	9.96901e+07	5.75956e+07	1.00335e+08	1.0576e+08	1.29166e+08	1.40258e+08	11398000	9740600	17646000	12690000	1	1313900	1.08991e+08	1.09828e+08	1.54957e+08	1.79506e+08	8.15617e+07	9.45716e+07
Q3ZCM7;Q5SQY0;F5H0I4	TUBB8;RP11-631M21.2	1	1	1	1	1	1	6.44398e+07	1.00066e+08	4.47623	8.89605e+07	9.66776e+07	8.99587e+07	1	1	16835000	18831000	42028000	1	6.1542	6.1542	6.1542	6.1542	1.28777e+08	6.1542
Q8N5Z5;Q8N5Z5-2;H0Y731	KCTD17	9283500	7265200	8906300	9681000	1	2242400	8.22014e+07	8.16016e+07	7.67136e+07	9.80115e+07	7.56751e+07	8.08586e+07	5926000	5947700	12646000	9861300	12219000	10953000	1.31891e+08	1.17767e+08	1.64034e+08	1.67339e+08	5.88951e+07	4.89844e+07
Q02818;H7BZI1;C9JKZ2;C9J3C1;C9JBD3	NUCB1	1	1	6766100	6325400	8931300	9107100	4.56217e+07	4.48115e+07	5.45921e+07	6.1472e+07	4.58187e+07	4.48205e+07	8263500	6213300	10747000	11379000	8774300	8292100	7.55305e+07	6.67916e+07	1.17262e+08	9.40608e+07	6.81209e+07	6.43607e+07
O95425;O95425-2;F5H2Q5;F5GXV0	SVIL	4050100	6703800	9176300	11653000	1686400	1	7.2582e+07	7.01917e+07	8.4162e+07	5.63647e+07	7.28148e+07	6.57468e+07	6365100	8342500	10213000	10481000	14152000	10687000	1.29171e+08	1.11446e+08	1.00301e+08	8.14447e+07	7.62506e+07	7.77276e+07
Q96DG6	CMBL	1	1	1	10285000	1	1	5.0174e+07	4.25192e+07	4.79628e+07	4.22663e+07	4.53128e+07	4.06043e+07	1	1	9889700	7389900	1	1	6.66069e+07	6.96348e+07	6.1542	8.10262e+07	7.66075e+07	9.28177e+07
Q6P3W7;F8VSC5;F8VPW3	SCYL2	1	4064500	6130300	5618400	1	3071100	4.99636e+07	6.79267e+07	5.32134e+07	6.68525e+07	2.71443e+07	3.01111e+07	1	4415200	7970200	6534600	5615700	6100200	7.75614e+07	5.52807e+07	8.93837e+07	1.15281e+08	4.23526e+07	4.3901e+07
Q9UHL4;R4GNE8;R4GMV4	DPP7	2112700	1	3140700	3337900	3221900	3442100	1.94564e+07	1.74806e+07	2.66622e+07	2.64147e+07	3.02566e+07	2.96953e+07	5507000	4819700	6175100	5270300	4127600	4030000	6.1542	1.35152e+07	2.13883e+07	1.61837e+07	2.16973e+07	2.98916e+07
J3KQN4;H0Y5B4;H7BZ11;P83881;R4GN19;H0Y3V9;H7BY91	RPL36A	1301900	1169100	1243700	454430	2474300	1612300	2.5976e+07	2.84012e+07	7.9735e+07	4.48876e+07	3.35399e+07	3.44249e+07	9994200	11384000	4624700	6192900	4742100	5217400	6.30929e+07	4.10824e+07	5.4802e+07	4.25563e+07	4.24486e+07	6.78993e+07
Q13671;Q13671-2;E9PNR2;E7EM96;E9PMB8	RIN1	233600	229000	1249300	1	856410	1	4.47623	9.22282e+06	1.21176e+08	6.49948e+07	2.91577e+07	1.22814e+07	342150000	416470000	586150000	578950000	547150000	661570000	1.39036e+08	2.16794e+08	1.19588e+08	4.56593e+07	2.20087e+07	7.89954e+07
P04049;P04049-2;B4E0X2;H7C155;B4E1N6;P10398;H7C560;H7C4S5	RAF1	5472200	2731300	4627200	4568900	9062300	7947700	2.19371e+07	2.69478e+07	3.58899e+07	1.22514e+07	2.53717e+07	2.13458e+07	93736000	109600000	207400000	180990000	155150000	152490000	2.08098e+07	4.52839e+07	3.3333e+07	4.25526e+07	2.31293e+07	1.79463e+07
Q96JH8;Q96JH8-1;B7Z2I1;F5H6X3;F8WEM1;C9J7G0;Q96JH8-2;Q96JH8-3	RADIL	11036000	1	18771000	1	22418000	1	4.47623	4.47623	4.47623	4.47623	4.47623	4.47623	38884000	87397000	115940000	141010000	156720000	129410000	6.1542	2.66311e+07	2.65603e+07	2.96682e+07	6.1542	6.1542
P01859	IGHG2	37529000	30300000	56431000	61901000	50189000	70190000	2.57625e+08	2.59388e+08	1.92943e+09	2.42808e+09	5.27658e+08	5.46234e+08	212760000	183370000	85453000	96743000	242350000	305770000	5.84243e+09	5.66593e+09	7.7303e+08	8.04108e+08	3.06356e+09	2.78041e+09
P15056;H7C5K3	BRAF	1	20009000	14625000	13262000	7128200	1	6.20226e+07	4.47623	4.47623	4.47623	4.47623	4.47623	18041000	18151000	33154000	30682000	35251000	32616000	6.1542	6.1542	6.1542	6.1542	6.1542	8.85098e+07
P04844;P04844-2;Q5JYR7;Q5JYR4;F2Z3K5	RPN2	869520	2174600	513530	3302200	2363100	1	4.47623	4.47623	1.09336e+08	1.07071e+08	1.05241e+08	4.47623	1	30688000	32397000	35117000	26121000	27221000	1.45873e+08	1.4002e+08	1.28026e+08	6.1542	3.16043e+08	3.16437e+08
Q9NX95;Q9NX95-3;Q9NX95-4;Q9NX95-2;Q9NX95-5;B7Z4D2;B3KRD1;E9PL50;E9PNN9;E9PL66;E9PN31;E9PLB9;E9PQG2;E9PRH8;E9PI48;E9PJ11;E9PPC2	SYBU	4594100	6017500	9774000	9364400	828240	1358500	5.05142e+07	1.45589e+07	5.36162e+07	4.47847e+07	7.8889e+07	7.13063e+07	9331900	12478000	17828000	14865000	16430000	14926000	8.59496e+07	6.44345e+07	9.12545e+07	9.41839e+07	5.97542e+07	6.72839e+07
Q6NZI2;Q6NZI2-2;Q6NZI2-3	PTRF	1969500	3330700	1	1	1	3106700	4.47623	4.47623	4.47623	1.18159e+07	4.47623	4.47623	3999400	4144500	11861000	6537700	13317000	6345100	6.1542	6.1542	1.92183e+07	2.07987e+07	6.1542	6.1542
P27105;B4E2V5;P27105-2	STOM	1	1	1	1	1	1	5.60424e+06	6.79491e+06	4.47623	4.47623	3.8218e+06	4.33169e+06	2393500	2232300	7280300	6119100	5777800	5217900	6.1542	6.1542	6.1542	6.1542	6.1542	6.1542
Q9UHI6;B4DWV7	DDX20	1	969970	945660	654590	1	1086600	3.83586e+06	3.85255e+06	4.47623	4.21012e+06	5.19645e+06	4.06965e+06	1143300	1587200	3107400	1834400	4534200	5314400	6.65269e+06	6.40899e+06	4.5871e+06	7.45828e+06	7.18688e+06	6.1542
O14744;O14744-2;G3V5W5;B4DX49;B4DV00;A8MTP3;H0YJX6;G3V580;G3V5L5;G3V2X6;C9JSX3;G3V2L6;H7BZ44;H0YJD3;H0YJ77;G3V5T6;G3V2F5;H0YJY6;G3V507	PRMT5	6766400000	7187700000	9910600000	9657500000	4849400000	4739800000	5.37863e+10	4.90594e+10	6.09796e+10	6.08901e+10	5.06351e+10	4.9149e+10	7681800000	7921600000	10057000000	10192000000	9551000000	9920400000	1.05606e+11	1.07945e+11	8.30017e+10	8.50388e+10	8.29587e+10	8.18878e+10
Q9BQA1;B4DP38;H0Y711	WDR77	3505300000	3863200000	4813200000	4797900000	2751000000	2475200000	3.02947e+10	3.24133e+10	3.33474e+10	3.06071e+10	3.08305e+10	2.89236e+10	3815400000	3879700000	5896100000	5551300000	5977400000	6162000000	4.89179e+10	5.54814e+10	4.96343e+10	4.55233e+10	4.4266e+10	4.53159e+10
Q86VP6;Q86VP6-2;H0YH27;Q86VP6-3	CAND1	709740	1	1	1457200	9091400	2295800	3.48237e+07	2.05159e+07	5.59707e+08	1.70549e+07	6.05634e+08	7.44397e+07	19357000	1	158890000	14907000	10778000	73133000	2.50427e+08	1.45332e+08	5.48604e+08	1.02978e+08	4.85917e+08	8.85528e+08
Q9NXV2;H3BSS5	KCTD5	69431000	70932000	87198000	88689000	25667000	30726000	6.92562e+08	5.15796e+08	1.83489e+09	1.98973e+09	5.88892e+08	7.20941e+08	93023000	80658000	107250000	102020000	262910000	219810000	3.74797e+09	3.72009e+09	9.4147e+08	8.62081e+08	1.88171e+09	1.73561e+09
Q14764;H3BQK6;H3BRL2;H3BNF6;H3BUK7;H3BP76;H3BQE7;H3BUP3;H3BNF2;H3BPZ2	MVP	73797000	92379000	128400000	111500000	82103000	83993000	8.53437e+08	7.53618e+08	8.66374e+08	8.45694e+08	7.59616e+08	7.74343e+08	103260000	85961000	104430000	112710000	104080000	95660000	1.09533e+09	1.13348e+09	1.9435e+09	1.82263e+09	9.30823e+08	8.50572e+08
Q5VX20;Q16875;Q16875-2;Q5W015;F2Z2I2;B7Z955;Q16875-3;H0Y483;F5H5L1;Q16877;Q66S35;B7Z5C3;Q64EX5;Q5XLC2;Q4VBA9;Q9H178	PFKFB3	19051000	45477000	67641000	55056000	37439000	41326000	3.70202e+08	3.39692e+08	3.49969e+08	3.30977e+08	3.26536e+08	3.68541e+08	50631000	52550000	72961000	76694000	58624000	72220000	4.05217e+08	5.29268e+08	7.13026e+08	6.8207e+08	4.99284e+08	4.59122e+08
Q15459;E9PAW1;H7C1L2;F8WB66;F8WC79	SF3A1	42442000	82421000	36752000	39811000	24863000	20522000	1.59676e+08	1.69662e+08	4.83074e+08	6.0532e+08	3.51057e+08	3.63129e+08	76756000	73577000	65652000	59138000	85285000	66665000	1.21878e+09	1.06671e+09	4.62531e+08	3.86798e+08	7.13888e+08	6.98748e+08
C9JA08;Q96D46;C9J0B9;C9K0C2;C9IZW9;C9IY70	NMD3	3093000	1403900	2067100	1	1217700	1	5.45652e+07	7.09258e+07	4.74301e+08	6.38937e+07	3.53237e+07	3.51469e+07	1	14341000	53643000	54705000	10398000	11731000	2.21841e+08	1.73216e+08	9.80857e+07	1.41534e+08	3.32598e+08	3.91457e+08
Q07283	TCHH	2768800	122920	9771600	12388000	7968700	12226000	6.87907e+07	5.70495e+07	2.30194e+07	9.60375e+07	6.85087e+07	1.23387e+08	10897000	11149000	22800000	3030600	22230000	20444000	1.12062e+08	7.71553e+07	2.02338e+08	1.96467e+08	1.4143e+08	1.35349e+08
O60825;B0FLL2;O60825-2;B4DY91;B4DI16;P16118;B4DUN5	PFKFB2	1	5749900	11472000	10419000	7899700	7112100	6.10736e+07	5.89474e+07	5.67004e+07	6.49948e+07	5.15348e+07	6.89294e+07	8582000	7356000	15382000	12851000	11712000	11453000	7.15303e+07	7.91492e+07	1.36968e+08	1.33411e+08	8.53834e+07	9.63071e+07
P01040;C9J0E4	CSTA	1828500	2380600	1870000	1970800	1	1731600	3.17217e+07	1.65902e+07	1.04583e+07	1.44757e+07	9.61449e+06	1.05697e+07	2893900	1836100	7678100	4963900	2719200	2550800	4.50826e+07	1.31405e+07	2.87826e+07	1.99138e+07	2.62052e+07	2.36777e+07
P29400-2;P29400;P02462;P02462-2	COL4A5;COL4A1	1	1	1	1	1	1	4.47623	4.47623	3.73568e+07	4.89834e+07	5.49994e+06	7.76312e+06	1	1	1	1	4170800	2633000	5.98472e+07	6.72347e+07	9.87196e+06	1.11502e+07	4.30899e+07	4.70304e+07

## Sheet: DIF NORMALISED WT VS G13D
Protein IDs	Gene names	FOLD WT/G13D	T.TEST
Q96DG6	CMBL	15.5582	7.6267e-09
Q7RTV0	PHF5A	11.9875	1.15133e-05
Q6P3W7;F8VSC5;F8VPW3	SCYL2	9.63613	0.000115749
Q14681	KCTD2	8.64207	7.37374e-08
Q8N5Z5;Q8N5Z5-2;H0Y731	KCTD17	8.60184	1.47061e-09
P52732;REV__Q58F21-2;REV__Q58F21-3;REV__Q58F21;REV__Q58F21-4;REV__Q58F21-5;REV__C9JJU3	KIF11	8.39557	1.51271e-11
Q14764;H3BQK6;H3BRL2;H3BNF6;H3BUK7;H3BP76;H3BQE7;H3BUP3;H3BNF2;H3BPZ2	MVP	8.00705	1.50563e-11
P84090;G3V279	ERH	7.50243	1.59141e-11
Q9Y6Y0;A8MVR0;H0Y5Y2	IVNS1ABP	7.42447	7.71383e-11
Q9NXV2;H3BSS5	KCTD5	7.32705	0.00769444
Q01804;Q01804-3;D6RI06;Q01804-2;Q7RTX8;Q01804-4;D6RA27	OTUD4	7.11315	5.92528e-08
O95425;O95425-2;F5H2Q5;F5GXV0	SVIL	7.00295	2.52256e-08
Q9UHB6;Q9UHB6-4;Q9UHB6-2;F8VQE1;F8VRN8;Q9UHB6-3;F8VS07;F8VTU2;F8VVQ7	LIMA1	6.94549	1.47397e-09
Q9ULV4-3;Q9ULV4-2;Q9ULV4;B4E3S0;H0YHL7;F8VVB7;F8VTT6;F8VRE9;F8VSA4;F8VUX3;F8W1H8;F8VV53;Q6QEF8;Q6QEF8-5;J3KSS5;J3QLV6;Q6QEF8-2;Q6QEF8-3;Q6QEF8-4	CORO1C	6.62271	7.27219e-08
Q9NYF8;Q9NYF8-2;Q9NYF8-4;H0YF14;B0AZU3	BCLAF1	6.57411	1.60391e-08
Q99417	MYCBP	6.50965	1.96976e-09
Q8TF72	SHROOM3	6.44308	1.2882e-05
Q9Y421;K7EIY1;K7ENN5;Q9Y421-2;Q9Y421-3;K7ELZ8	FAM32A	6.40033	1.58033e-06
Q9NQ92;H9KV77;J3QRX4;J3QRX9;J3QRX6	COPR5;C17orf79	6.38635	8.12567e-10
Q9BRS2	RIOK1	6.37116	2.6975e-13
Q9NXE8;B4DJK2;Q9NXE8-2;B4DZL1;J3QLP6	CWC25	6.35328	9.66517e-07
Q9Y2W1	THRAP3	6.27883	1.68434e-08
P98175-2;P98175-4	RBM10	6.04376	8.43579e-10
Q9BQA1;B4DP38;H0Y711	WDR77	5.95924	1.48019e-11
O14744;O14744-2;G3V5W5;B4DX49;B4DV00;A8MTP3;H0YJX6;G3V580;G3V5L5;G3V2X6;C9JSX3;G3V2L6;H7BZ44;H0YJD3;H0YJ77;G3V5T6;G3V2F5;H0YJY6;G3V507	PRMT5	5.86546	3.00815e-09
J3KQN4;H0Y5B4;H7BZ11;P83881;R4GN19;H0Y3V9;H7BY91	RPL36A	5.85845	0.00201827
G3V0I6	OTUD4	5.8287	2.33358e-10
F5H012;P19474;P19474-2;H0YDP8	TRIM21	5.75774	7.37737e-11
Q3ZCM7;Q5SQY0;F5H0I4	TUBB8;RP11-631M21.2	5.66456	0.00518005
O75688;O75688-4;C9JIR6;B8ZZF0;O75688-5;O75688-3	PPM1B	5.64063	1.50029e-11
Q96I25;Q5W010;Q5W011;Q5W012;H0Y6J6	RBM17	5.60804	1.95144e-09
P62304;A6NHK2	SNRPE	5.55624	0.000272751
Q02818;H7BZI1;C9JKZ2;C9J3C1;C9JBD3	NUCB1	5.53644	7.75541e-08
Q5VX20;Q16875;Q16875-2;Q5W015;F2Z2I2;B7Z955;Q16875-3;H0Y483;F5H5L1;Q16877;Q66S35;B7Z5C3;Q64EX5;Q5XLC2;Q4VBA9;Q9H178	PFKFB3	5.43661	2.21263e-11
O60825;B0FLL2;O60825-2;B4DY91;B4DI16;P16118;B4DUN5	PFKFB2	5.37871	7.00525e-09
Q8TA86;C9J6V2	RP9	5.2206	5.15836e-08
Q9UHL4;R4GNE8;R4GMV4	DPP7	5.0106	3.76531e-06
Q15459;E9PAW1;H7C1L2;F8WB66;F8WC79	SF3A1	4.99193	0.00255591
E7EX17;P23588;B4DS13;F8VX11;F8VP89;F8VSC7;F8W0K0;F8VYE9;F8VRU1;REV__E7EX17;REV__P23588;REV__B4DS13;REV__F8VX11	EIF4B	4.98032	3.93279e-08
Q9UPQ9;Q9UPQ9-1;H0Y720;Q9UPQ9-2	TNRC6B	4.94741	2.13995e-07
Q07283	TCHH	4.82374	0.00243255
P27361;P27361-3;E9PQW4;P27361-2;E9PBK7;B3KR49;E9PJF0;E9PRH7;H0YEX6;H0YDH9	MAPK3	4.63283	1.85661e-05
P01040;C9J0E4	CSTA	4.1264	0.00744497
Q9NX95;Q9NX95-3;Q9NX95-4;Q9NX95-2;Q9NX95-5;B7Z4D2;B3KRD1;E9PL50;E9PNN9;E9PL66;E9PN31;E9PLB9;E9PQG2;E9PRH8;E9PI48;E9PJ11;E9PPC2	SYBU	3.65331	0.002219
Q03135;E9PCT5;Q03135-2;C9JKI3;P56539	CAV1	2.31506	6.88683e-07
Q6NZI2;Q6NZI2-2;Q6NZI2-3	PTRF	0.25573	0.0482121
P04049;P04049-2;B4E0X2;H7C155;B4E1N6;P10398;H7C560;H7C4S5	RAF1	0.159828	3.21931e-05
Q13671;Q13671-2;E9PNR2;E7EM96;E9PMB8	RIN1	0.0756065	3.22129e-06
Q96JH8;Q96JH8-1;B7Z2I1;F5H6X3;F8WEM1;C9J7G0;Q96JH8-2;Q96JH8-3	RADIL	4.01239e-08	7.81387e-05

## Sheet: DIF G13D VS NORMALISED G12V
Protein IDs	Gene names	FOLD G13D/G12V	T.TEST
P27105;B4E2V5;P27105-2	STOM	785937	0.000191101
Q96JH8;Q96JH8-1;B7Z2I1;F5H6X3;F8WEM1;C9J7G0;Q96JH8-2;Q96JH8-3	RADIL	8.07826	0.00035482
Q13671;Q13671-2;E9PNR2;E7EM96;E9PMB8	RIN1	5.03542	2.31467e-05
P04049;P04049-2;B4E0X2;H7C155;B4E1N6;P10398;H7C560;H7C4S5	RAF1	4.91309	5.94404e-05
E7EQZ4;Q16637;Q16637-3;Q16637-2;Q16637-4;B4DP61;H0YBZ9	SMN1	0.42304	0.000198612
P49356;H0YHI0;B4DL54;B4E1A0;B3KSC2	FNTB;CHURC1-FNTB	0.402081	3.23092e-05
P49354;E9PQP6;H0YE66;P49354-2;B3KVN2;H0YCW1;E9PPM9;E9PN85	FNTA	0.38128	7.89544e-05
Q9UHL4;R4GNE8;R4GMV4	DPP7	0.291496	0.0149671
Q03135;E9PCT5;Q03135-2;C9JKI3;P56539	CAV1	0.290566	3.4788e-08
P62304;A6NHK2	SNRPE	0.203716	5.5932e-07
Q9NX95;Q9NX95-3;Q9NX95-4;Q9NX95-2;Q9NX95-5;B7Z4D2;B3KRD1;E9PL50;E9PNN9;E9PL66;E9PN31;E9PLB9;E9PQG2;E9PRH8;E9PI48;E9PJ11;E9PPC2	SYBU	0.185496	1.5256e-06
Q9UPQ9;Q9UPQ9-1;H0Y720;Q9UPQ9-2	TNRC6B	0.175238	7.08382e-07
P27361;P27361-3;E9PQW4;P27361-2;E9PBK7;B3KR49;E9PJF0;E9PRH7;H0YEX6;H0YDH9	MAPK3	0.169161	2.30036e-08
F5H012;P19474;P19474-2;H0YDP8	TRIM21	0.15318	5.02172e-10
Q9NQ92;H9KV77;J3QRX4;J3QRX9;J3QRX6	COPR5;C17orf79	0.150946	3.26818e-06
E7EX17;P23588;B4DS13;F8VX11;F8VP89;F8VSC7;F8W0K0;F8VYE9;F8VRU1;REV__E7EX17;REV__P23588;REV__B4DS13;REV__F8VX11	EIF4B	0.148278	3.50355e-08
P04844;P04844-2;Q5JYR7;Q5JYR4;F2Z3K5	RPN2	0.144824	0.014031
P01040;C9J0E4	CSTA	0.144398	0.000548824
P98175-2;P98175-4	RBM10	0.137992	5.9484e-08
Q99417	MYCBP	0.137879	2.16344e-07
Q96I25;Q5W010;Q5W011;Q5W012;H0Y6J6	RBM17	0.136303	3.5806e-05
J3KQN4;H0Y5B4;H7BZ11;P83881;R4GN19;H0Y3V9;H7BY91	RPL36A	0.135164	3.60821e-06
Q9Y2W1	THRAP3	0.133318	2.26883e-06
Q8TF72	SHROOM3	0.133224	0.0140162
Q8TA86;C9J6V2	RP9	0.132811	3.23626e-07
O75688;O75688-4;C9JIR6;B8ZZF0;O75688-5;O75688-3	PPM1B	0.12896	6.47328e-08
Q9NYF8;Q9NYF8-2;Q9NYF8-4;H0YF14;B0AZU3	BCLAF1	0.127426	3.49793e-07
Q9BRS2	RIOK1	0.126687	5.18084e-07
P84090;G3V279	ERH	0.124947	2.09648e-09
G3V0I6	OTUD4	0.124181	9.02581e-08
Q9ULV4-3;Q9ULV4-2;Q9ULV4;B4E3S0;H0YHL7;F8VVB7;F8VTT6;F8VRE9;F8VSA4;F8VUX3;F8W1H8;F8VV53;Q6QEF8;Q6QEF8-5;J3KSS5;J3QLV6;Q6QEF8-2;Q6QEF8-3;Q6QEF8-4	CORO1C	0.120709	5.43745e-06
Q01804;Q01804-3;D6RI06;Q01804-2;Q7RTX8;Q01804-4;D6RA27	OTUD4	0.117871	6.54462e-07
Q9Y6Y0;A8MVR0;H0Y5Y2	IVNS1ABP	0.11758	1.91245e-11
Q5VX20;Q16875;Q16875-2;Q5W015;F2Z2I2;B7Z955;Q16875-3;H0Y483;F5H5L1;Q16877;Q66S35;B7Z5C3;Q64EX5;Q5XLC2;Q4VBA9;Q9H178	PFKFB3	0.116691	2.39092e-06
Q86VP6;Q86VP6-2;H0YH27;Q86VP6-3	CAND1	0.114547	0.0162329
O60825;B0FLL2;O60825-2;B4DY91;B4DI16;P16118;B4DUN5	PFKFB2	0.111715	1.58585e-05
Q02818;H7BZI1;C9JKZ2;C9J3C1;C9JBD3	NUCB1	0.110402	7.19348e-06
Q9BQA1;B4DP38;H0Y711	WDR77	0.10819	2.93383e-10
C9JA08;Q96D46;C9J0B9;C9K0C2;C9IZW9;C9IY70	NMD3	0.106583	0.00167938
Q07283	TCHH	0.104707	7.4376e-05
O95425;O95425-2;F5H2Q5;F5GXV0	SVIL	0.104522	1.97307e-06
O14744;O14744-2;G3V5W5;B4DX49;B4DV00;A8MTP3;H0YJX6;G3V580;G3V5L5;G3V2X6;C9JSX3;G3V2L6;H7BZ44;H0YJD3;H0YJ77;G3V5T6;G3V2F5;H0YJY6;G3V507	PRMT5	0.101244	1.54357e-08
Q14681	KCTD2	0.0954219	0.000226352
Q15459;E9PAW1;H7C1L2;F8WB66;F8WC79	SF3A1	0.0939148	0.000447266
Q9NXE8;B4DJK2;Q9NXE8-2;B4DZL1;J3QLP6	CWC25	0.0916241	3.01537e-10
Q9Y421;K7EIY1;K7ENN5;Q9Y421-2;Q9Y421-3;K7ELZ8	FAM32A	0.0874843	2.15241e-09
Q9UHB6;Q9UHB6-4;Q9UHB6-2;F8VQE1;F8VRN8;Q9UHB6-3;F8VS07;F8VTU2;F8VVQ7	LIMA1	0.0857921	7.65119e-07
P52732;REV__Q58F21-2;REV__Q58F21-3;REV__Q58F21;REV__Q58F21-4;REV__Q58F21-5;REV__C9JJU3	KIF11	0.0843433	1.09364e-07
Q8N5Z5;Q8N5Z5-2;H0Y731	KCTD17	0.0835421	0.000493859
Q14764;H3BQK6;H3BRL2;H3BNF6;H3BUK7;H3BP76;H3BQE7;H3BUP3;H3BNF2;H3BPZ2	MVP	0.0779418	9.4581e-05
Q7RTV0	PHF5A	0.072371	2.87879e-05
Q6P3W7;F8VSC5;F8VPW3	SCYL2	0.0722954	0.000244099
Q9NXV2;H3BSS5	KCTD5	0.0671639	0.00357587
P01859	IGHG2	0.0595075	0.00863128
Q96DG6	CMBL	0.0446856	0.00107329
P29400-2;P29400;P02462;P02462-2	COL4A5;COL4A1	0.0285605	0.00301402
