# Supplementary material for: Proteomic Mapping of the Interactome of KRAS Mutants Identifies New Features of RAS Signalling Networks and the Mechanism of Action of Sotorasib
Source: Cancers (Basel). 2023 Aug 17;15(16):4141. doi: 10.3390/cancers15164141 (PMC10452836; doi:10.3390/cancers15164141)
Supplement: Supplementary file 1 [file cancers-15-04141-s001.zip › Table S3 FUNCTIONAL CLUSTERS Figure 3B.xlsx]

## Sheet: Figure 3B 
GO:RasGTPase binding	#node	identifier	domain_summary_url	annotation
	AP3M1	9606.ENSP00000347408	AP-3 complex subunit mu-1	Part of the AP-3 complex, an adaptor-related complex which is not clathrin-associated. The complex is associated with the Golgi region as well as more peripheral structures. It facilitates the budding of vesicles from the Golgi membrane and may be directly involved in trafficking to lysosomes. In concert with the BLOC-1 complex, AP-3 is required to target cargos into vesicles assembled at cell bo…
	CSE1L	9606.ENSP00000262982	Exportin-2	Export receptor for importin-alpha. Mediates importin- alpha re-export from the nucleus to the cytoplasm after import substrates (cargos) have been released into the nucleoplasm. In the nucleus binds cooperatively to importin-alpha and to the GTPase Ran in its active GTP-bound form. Docking of this trimeric complex to the nuclear pore complex (NPC) is mediated through binding to nucleoporins. Upo…
	EVI5	9606.ENSP00000359356	Ecotropic viral integration site 5 protein homolog	Functions as a regulator of cell cycle progression by stabilizing the FBXO5 protein and promoting cyclin-A accumulation during interphase. May play a role in cytokinesis
	EXOC1	9606.ENSP00000370695	Exocyst complex component 1	Component of the exocyst complex involved in the docking of exocytic vesicles with fusion sites on the plasma membrane
	EXOC2	9606.ENSP00000230449	Exocyst complex component 2	Component of the exocyst complex involved in the docking of exocytic vesicles with fusion sites on the plasma membrane
	EXOC4	9606.ENSP00000253861	Exocyst complex component 4	Component of the exocyst complex involved in the docking of exocytic vesicles with fusion sites on the plasma membrane
	IPO4	9606.ENSP00000346453	Importin-4	Functions in nuclear protein import as nuclear transport receptor. Serves as receptor for nuclear localization signals (NLS) in cargo substrates. Is thought to mediate docking of the importin/substrate complex to the nuclear pore complex (NPC) through binding to nucleoporin and the complex is subsequently translocated through the pore by an energy requiring, Ran- dependent mechanism. At the nucle…
	IPO5	9606.ENSP00000261574	Importin-5	Functions in nuclear protein import as nuclear transport receptor. Serves as receptor for nuclear localization signals (NLS) in cargo substrates. Is thought to mediate docking of the importin/substrate complex to the nuclear pore complex (NPC) through binding to nucleoporin and the complex is subsequently translocated through the pore by an energy requiring, Ran- dependent mechanism. At the nucle…
	IPO7	9606.ENSP00000369042	Importin-7	Functions in nuclear protein import, either by acting as autonomous nuclear transport receptor or as an adapter-like protein in association with the importin-beta subunit KPNB1. Acting autonomously, is thought to serve itself as receptor for nuclear localization signals (NLS) and to promote translocation of import substrates through the nuclear pore complex (NPC) by an energy requiring, Ran-depen…
	IPO8	9606.ENSP00000256079	Importin-8	Seems to function in nuclear protein import, either by acting as autonomous nuclear transport receptor or as an adapter- like protein in association with the importin-beta subunit KPNB1. Acting autonomously, is thought to serve itself as receptor for nuclear localization signals (NLS) and to promote translocation of import substrates through the nuclear pore complex (NPC) by an energy requiring, …
	IPO9	9606.ENSP00000354742	Importin-9	Functions in nuclear protein import as nuclear transport receptor. Serves as receptor for nuclear localization signals (NLS) in cargo substrates. Is thought to mediate docking of the importin/substrate complex to the nuclear pore complex (NPC) through binding to nucleoporin and the complex is subsequently translocated through the pore by an energy requiring, Ran- dependent mechanism. At the nucle…
	KPNB1	9606.ENSP00000290158	Karyopherin subunit beta 1	Importin subunit beta-1
	MLLT4	9606.ENSP00000375960	Afadin	Belongs to an adhesion system, probably together with the E-cadherin-catenin system, which plays a role in the organization of homotypic, interneuronal and heterotypic cell-cell adherens junctions (AJs). Nectin- and actin-filament-binding protein that connects nectin to the actin cytoskeleton
	PPP6R1	9606.ENSP00000414202	Serine/threonine-protein phosphatase 6 regulatory subunit 1	Regulatory subunit of protein phosphatase 6 (PP6). May function as a scaffolding PP6 subunit. Involved in the PP6- mediated dephosphorylation of NFKBIE opposing its degradation in response to TNF-alpha
	RANGAP1	9606.ENSP00000401470	Ran GTPase-activating protein 1	GTPase activator for the nuclear Ras-related regulatory protein Ran, converting it to the putatively inactive GDP-bound state
	TNPO1	9606.ENSP00000336712	Transportin-1	Functions in nuclear protein import as nuclear transport receptor. Serves as receptor for nuclear localization signals (NLS) in cargo substrates. Is thought to mediate docking of the importin/substrate complex to the nuclear pore complex (NPC) through binding to nucleoporin and the complex is subsequently translocated through the pore by an energy requiring, Ran-dependent mechanism. At the nucleo…
	TNPO2	9606.ENSP00000407182	Transportin-2	Probably functions in nuclear protein import as nuclear transport receptor. Serves as receptor for nuclear localization signals (NLS) in cargo substrates. Is thought to mediate docking of the importin/substrate complex to the nuclear pore complex (NPC) through binding to nucleoporin and the complex is subsequently translocated through the pore by an energy requiring, Ran-dependent mechanism. At t…
	XPO1	9606.ENSP00000384863	Exportin-1	Mediates the nuclear export of cellular proteins (cargos) bearing a leucine-rich nuclear export signal (NES) and of RNAs. In the nucleus, in association with RANBP3, binds cooperatively to the NES on its target protein and to the GTPase RAN in its active GTP-bound form (Ran-GTP). Docking of this complex to the nuclear pore complex (NPC) is mediated through binding to nucleoporins. Upon transit of…
	XPO5	9606.ENSP00000265351	Exportin-5	Mediates the nuclear export of proteins bearing a double-stranded RNA binding domain (dsRBD) and double-stranded RNAs (cargos). XPO5 in the nucleus binds cooperatively to the RNA and to the GTPase Ran in its active GTP-bound form. Proteins containing dsRBDs can associate with this trimeric complex through the RNA. Docking of this complex to the nuclear pore complex (NPC) is mediated through bindi…
	XPOT	9606.ENSP00000327821	Exportin-T	Mediates the nuclear export of aminoacylated tRNAs. In the nucleus binds to tRNA and to the GTPase Ran in its active GTP- bound form. Docking of this trimeric complex to the nuclear pore complex (NPC) is mediated through binding to nucleoporins. Upon transit of a nuclear export complex into the cytoplasm, disassembling of the complex and hydrolysis of Ran-GTP to Ran-GDP (induced by RANBP1 and RAN…
GO:mTOR	#node	identifier	domain_summary_url	annotation
	ATP6V1H	9606.ENSP00000352522	V-type proton ATPase subunit H	Subunit of the peripheral V1 complex of vacuolar ATPase. Subunit H activates the ATPase activity of the enzyme and couples ATPase activity to proton flow. Vacuolar ATPase is responsible for acidifying a variety of intracellular compartments in eukaryotic cells, thus providing most of the energy required for transport processes in the vacuolar system (By similarity). Involved in the endocytosis me…
	BRAF	9606.ENSP00000288602	B-raf proto-oncogene serine/threonine-protein kinase	Serine/threonine-protein kinase B-raf
	KRAS	9606.ENSP00000256078	GTPase KRas	Ras proteins bind GDP/GTP and possess intrinsic GTPase activity. Plays an important role in the regulation of cell proliferation. Plays a role in promoting oncogenic events by inducing transcriptional silencing of tumor suppressor genes (TSGs) in colorectal cancer (CRC) cells in a ZNF304-dependent manner
	LAMTOR1	9606.ENSP00000278671	Late endosomal/lysosomal adaptor, mapk and mtor activator 1	Ragulator complex protein LAMTOR1
	LAMTOR2	9606.ENSP00000357288	Ragulator complex protein LAMTOR2	As part of the Ragulator complex it is involved in amino acid sensing and activation of mTORC1, a signaling complex promoting cell growth in response to growth factors, energy levels, and amino acids. Activated by amino acids through a mechanism involving the lysosomal V-ATPase, the Ragulator functions as a guanine nucleotide exchange factor activating the small GTPases Rag. Activated Ragulator a…
	MTOR	9606.ENSP00000354558	Serine/threonine-protein kinase mTOR	Serine/threonine protein kinase which is a central regulator of cellular metabolism, growth and survival in response to hormones, growth factors, nutrients, energy and stress signals. MTOR directly or indirectly regulates the phosphorylation of at least 800 proteins. Functions as part of 2 structurally and functionally distinct signaling complexes mTORC1 and mTORC2 (mTOR complex 1 and 2). Activat…
	RAF1	9606.ENSP00000251849	RAF proto-oncogene serine/threonine-protein kinase	Serine/threonine-protein kinase that acts as a regulatory link between the membrane-associated Ras GTPases and the MAPK/ERK cascade, and this critical regulatory link functions as a switch determining cell fate decisions including proliferation, differentiation, apoptosis, survival and oncogenic transformation. RAF1 activation initiates a mitogen-activated protein kinase (MAPK) cascade that compr…
	SEC13	9606.ENSP00000373312	Protein SEC13 homolog	Functions as a component of the nuclear pore complex (NPC) and the COPII coat. At the endoplasmic reticulum, SEC13 is involved in the biogenesis of COPII-coated vesicles
	TELO2	9606.ENSP00000262319	Telomere length regulation protein TEL2 homolog	Regulator of the DNA damage response (DDR). Part of the TTT complex that is required to stabilize protein levels of the phosphatidylinositol 3-kinase-related protein kinase (PIKK) family proteins. The TTT complex is involved in the cellular resistance to DNA damage stresses, like ionizing radiation (IR), ultraviolet (UV) and mitomycin C (MMC). Together with the TTT complex and HSP90 may participa…
GO:Protein farnesilation complex	#node	identifier	domain_summary_url	annotation
	FNTA	9606.ENSP00000303423	Protein farnesyltransferase/geranylgeranyltransferase type-1 subunit alpha	Essential subunit of both the farnesyltransferase and the geranylgeranyltransferase complex. Contributes to the transfer of a farnesyl or geranylgeranyl moiety from farnesyl or geranylgeranyl diphosphate to a cysteine at the fourth position from the C-terminus of several proteins having the C-terminal sequence Cys-aliphatic-aliphatic-X. May positively regulate neuromuscular junction development d…
	FNTB	9606.ENSP00000246166	Protein farnesyltransferase subunit beta	Essential subunit of the farnesyltransferase complex. Catalyzes the transfer of a farnesyl moiety from farnesyl diphosphate to a cysteine at the fourth position from the C- terminus of several proteins having the C-terminal sequence Cys- aliphatic-aliphatic-X
Cell cycle (reactome)	#node	identifier	domain_summary_url	annotation
	ANAPC7	9606.ENSP00000394394	Anaphase-promoting complex subunit 7	Component of the anaphase promoting complex/cyclosome (APC/C), a cell cycle-regulated E3 ubiquitin ligase that controls progression through mitosis and the G1 phase of the cell cycle. The APC/C complex acts by mediating ubiquitination and subsequent degradation of target proteins: it mainly mediates the formation of 'Lys-11'-linked polyubiquitin chains and, to a lower extent, the formation of 'Ly…
	EMD	9606.ENSP00000358857	Emerin	Stabilizes and promotes the formation of a nuclear actin cortical network. Stimulates actin polymerization in vitro by binding and stabilizing the pointed end of growing filaments. Inhibits beta-catenin activity by preventing its accumulation in the nucleus. Acts by influencing the nuclear accumulation of beta- catenin through a CRM1-dependent export pathway. Links centrosomes to the nuclear enve…
	FEN1	9606.ENSP00000305480	Flap endonuclease 1	Structure-specific nuclease with 5'-flap endonuclease and 5'-3' exonuclease activities involved in DNA replication and repair. During DNA replication, cleaves the 5'-overhanging flap structure that is generated by displacement synthesis when DNA polymerase encounters the 5'-end of a downstream Okazaki fragment. It enters the flap from the 5'-end and then tracks to cleave the flap base, leaving a …
	KPNB1	9606.ENSP00000290158	Karyopherin subunit beta 1	Importin subunit beta-1
	LBR	9606.ENSP00000339883	Delta14-sterol reductase (lamin-B receptor)	Lamin-B receptor
	NCAPD2	9606.ENSP00000325017	Condensin complex subunit 1	Regulatory subunit of the condensin complex, a complex required for conversion of interphase chromatin into mitotic-like condense chromosomes. The condensin complex probably introduces positive supercoils into relaxed DNA in the presence of type I topoisomerases and converts nicked DNA into positive knotted forms in the presence of type II topoisomerases. May target the condensin complex to DNA v…
	NCAPG2	9606.ENSP00000387007	Condensin-2 complex subunit G2	Regulatory subunit of the condensin-2 complex, a complex which establishes mitotic chromosome architecture and is involved in physical rigidity of the chromatid axis
	NCAPH	9606.ENSP00000240423	Condensin complex subunit 2	Regulatory subunit of the condensin complex, a complex required for conversion of interphase chromatin into mitotic-like condense chromosomes. The condensin complex probably introduces positive supercoils into relaxed DNA in the presence of type I topoisomerases and converts nicked DNA into positive knotted forms in the presence of type II topoisomerases
	NUP133	9606.ENSP00000261396	Nuclear pore complex protein Nup133	Involved in poly(A)+ RNA transport
	NUP188	9606.ENSP00000361658	Nucleoporin NUP188 homolog	May function as a component of the nuclear pore complex (NPC)
	NUP205	9606.ENSP00000285968	Nuclear pore complex protein Nup205	Plays a role in the nuclear pore complex (NPC) assembly and/or maintenance. May anchor NUP62 and other nucleoporins, but not NUP153 and TPR, to the NPC
	NUP93	9606.ENSP00000310668	Nuclear pore complex protein Nup93	Plays a role in the nuclear pore complex (NPC) assembly and/or maintenance. May anchor nucleoporins, but not NUP153 and TPR, to the NPC. During renal development, regulates podocyte migration and proliferation through SMAD4 signaling
	PDS5A	9606.ENSP00000303427	Sister chromatid cohesion protein PDS5 homolog A	Probable regulator of sister chromatid cohesion in mitosis which may stabilize cohesin complex association with chromatin. May couple sister chromatid cohesion during mitosis to DNA replication. Cohesion ensures that chromosome partitioning is accurate in both meiotic and mitotic cells and plays an important role in DNA repair
	RANGAP1	9606.ENSP00000401470	Ran GTPase-activating protein 1	GTPase activator for the nuclear Ras-related regulatory protein Ran, converting it to the putatively inactive GDP-bound state
	SEC13	9606.ENSP00000373312	Protein SEC13 homolog	Functions as a component of the nuclear pore complex (NPC) and the COPII coat. At the endoplasmic reticulum, SEC13 is involved in the biogenesis of COPII-coated vesicles
	SMC2	9606.ENSP00000286398	Structural maintenance of chromosomes protein 2	Central component of the condensin complex, a complex required for conversion of interphase chromatin into mitotic-like condense chromosomes. The condensin complex probably introduces positive supercoils into relaxed DNA in the presence of type I topoisomerases and converts nicked DNA into positive knotted forms in the presence of type II topoisomerases
	SMC4	9606.ENSP00000349961	Structural maintenance of chromosomes protein 4	Central component of the condensin complex, a complex required for conversion of interphase chromatin into mitotic-like condense chromosomes. The condensin complex probably introduces positive supercoils into relaxed DNA in the presence of type I topoisomerases and converts nicked DNA into positive knotted forms in the presence of type II topoisomerases
	TNPO1	9606.ENSP00000336712	Transportin-1	Functions in nuclear protein import as nuclear transport receptor. Serves as receptor for nuclear localization signals (NLS) in cargo substrates. Is thought to mediate docking of the importin/substrate complex to the nuclear pore complex (NPC) through binding to nucleoporin and the complex is subsequently translocated through the pore by an energy requiring, Ran-dependent mechanism. At the nucleo…
	TUBAL3	9606.ENSP00000369784	Tubulin alpha chain-like 3	Tubulin is the major constituent of microtubules. It binds two moles of GTP, one at an exchangeable site on the beta chain and one at a non-exchangeable site on the alpha chain (By similarity)
	TUBB	9606.ENSP00000339001	Tubulin beta chain	Tubulin is the major constituent of microtubules. It binds two moles of GTP, one at an exchangeable site on the beta chain and one at a non-exchangeable site on the alpha chain
	TUBB2A	9606.ENSP00000369703	Tubulin beta-2A chain	Tubulin is the major constituent of microtubules. It binds two moles of GTP, one at an exchangeable site on the beta chain and one at a non-exchangeable site on the alpha chain (By similarity)
	XPO1	9606.ENSP00000384863	Exportin-1	Mediates the nuclear export of cellular proteins (cargos) bearing a leucine-rich nuclear export signal (NES) and of RNAs. In the nucleus, in association with RANBP3, binds cooperatively to the NES on its target protein and to the GTPase RAN in its active GTP-bound form (Ran-GTP). Docking of this complex to the nuclear pore complex (NPC) is mediated through binding to nucleoporins. Upon transit of…
	YWHAG	9606.ENSP00000306330	14-3-3 protein gamma	Adapter protein implicated in the regulation of a large spectrum of both general and specialized signaling pathways. Binds to a large number of partners, usually by recognition of a phosphoserine or phosphothreonine motif. Binding generally results in the modulation of the activity of the binding partner
	ZW10	9606.ENSP00000200135	Centromere/kinetochore protein zw10 homolog	Essential component of the mitotic checkpoint, which prevents cells from prematurely exiting mitosis. Required for the assembly of the dynein-dynactin and MAD1-MAD2 complexes onto kinetochores. Its function related to the spindle assembly machinery is proposed to depend on its association in the mitotic RZZ complex. Involved in regulation of membrane traffic between the Golgi and the endoplasmic …
