# Supplementary material for: Proteomic Mapping of the Interactome of KRAS Mutants Identifies New Features of RAS Signalling Networks and the Mechanism of Action of Sotorasib
Source: Cancers (Basel). 2023 Aug 17;15(16):4141. doi: 10.3390/cancers15164141 (PMC10452836; doi:10.3390/cancers15164141)
Supplement: Supplementary file 1 [file cancers-15-04141-s001.zip › Table S4 KRASG12C and KRAS WT sotorasib interactomes.xlsx]

## Sheet: DESCRIPTION
		LFQ Intensities tab shows all the proteins identified in the experiment	Immunoprecipitation FLAG Trap
		HEK293 cell line transfected with:	Experiment label
		pCEFL-FLAG	EV
		pCEFL-FLAG-KRAS WT	WT
		pCEFL-FLAG-KRAS WT + 5µM Sotorasib	WT&i
		pCEFL-FLAG-KRASG12C	G12C
		pCEFL-FLAG-KRASG12C + 5µM Sotorasib	G12C&i
Description			Cut off
KRAS specific interacting proteins cut off		ratio Average LFQ condition/Average LFQ EV	>2
Tabs: specific KRASG12C; specific KRASG12C&i; specific KRAS WT; specific KRAS WT&i		T.TEST LFQ condition vs LFQ EV	p-value <0.01
KRAS specific interacting proteins cut off		ratio Average LFQ condition 1/Average LFQ condition 2	>2 or <0.5
Tabs: DIF KRASG12C VS KRASG12C&i; DIF KRAS WT VS KRAS WT&i		T.TEST LFQ condition 1 VS LFQ condition 2	p-value <0.05
Gene names	Replaced Protein names
DNAJB6;DNAJB8;DNAJB2	DNAJB6
HLA-C;HLA-H;HLA-E;HLA-B;HLA-A	HLA-C
GNA11;GNAQ	GNA11
RAP1B;RAP1A	RAP1B
SNRPG;SNRPGP15	SNRPG
TIMM23;TIMM23B	TIMM23
RAB6A;RAB6B;RAB39A	RAB6A/B
SLC25A6;SLC25A4	SLC25A
H2AFV;H2AFZ	H2AZ1/2
DYNLL1;DYNLL2	DYNLL1/2
HIST1H2AC;HIST3H2A;HIST1H2AB	H2AC6/H2AW/H2AC4
HNRNPC;HNRNPCL4;HNRNPCL1;HNRNPCL3;HNRNPCL2	HNRNPC
HIST1H2BL;HIST1H2BM;HIST1H2BN;HIST1H2BH;HIST2H2BF;HIST1H2BC;HIST1H2BD;HIST1H2BK;H2BFS;HIST1H2BA	H2BC13/14/15
ACTA1;ACTC1;ACTG2;ACTA2	ACTA1/ACTC1
HIST2H2BE;HIST1H2BB;HIST1H2BO;HIST1H2BJ;HIST3H2BB	H2BC21/3/17
HIST1H2AJ;HIST1H2AH;H2AFJ;HIST2H2AC;HIST2H2AA3;HIST1H2AD;HIST1H2AG	H2AC14/12/H2AJ
RAB10;RAB1A;RAB13;RAB8B;RAB8A;RAB15	RAB10/1A
RPL26;RPL26L1	RPL26/L1
UBA52;RPS27A;UBB;UBC	UBA52/RPS27A
HIST1H1E;HIST1H1D	H1-4/H1-3
RBMX;RBMXL1	RBMX

## Sheet: LFQ INTENSITIES
Protein IDs	Protein names	Gene names	Fasta headers	LFQ intensity EV 1	LFQ intensity EV 1_1	LFQ intensity EV 2	LFQ intensity EV 2_1	LFQ intensity EV 3	LFQ intensity EV 3_1	LFQ intensity WT 4	LFQ intensity WT 4_1	LFQ intensity WT 5	LFQ intensity WT 5_1	LFQ intensity WT 6	LFQ intensity WT 6_1	LFQ intensity WT&i 7	LFQ intensity WT&i 7_1	LFQ intensity WT&i 8	LFQ intensity WT&i 8_1	LFQ intensity WT&i 9	LFQ intensity WT&i 9_1	LFQ intensity KRASG12C 10	LFQ intensity KRASG12C 10_1	LFQ intensity KRASG12C 11	LFQ intensity KRASG12C 11_1	LFQ intensity KRASG12C 12	LFQ intensity KRASG12C 12_1	LFQ intensity KRASG12C&i 13	LFQ intensity KRASG12C&i 13_1	LFQ intensity KRASG12C&i 14	LFQ intensity KRASG12C&i 14_1	LFQ intensity KRASG12C&i 15	LFQ intensity KRASG12C&i 15_1
A0JLT2-2;A0JLT2	Mediator of RNA polymerase II transcription subunit 19	MED19	sp|A0JLT2-2|MED19_HUMAN Isoform 2 of Mediator of RNA polymerase II transcription subunit 19 OS=Homo sapiens OX=9606 GN=MED19;sp|A0JLT2|MED19_HUMAN Mediator of RNA polymerase II transcription subunit 19 OS=Homo sapiens OX=9606 GN=MED19 PE=1 SV=2	1	1	1	1	1	1	1	1	7853.4	1145.2	3852.7	1	6453.2	3820.7	5941.3	5433.8	3414.2	12684	21251	16344	15023	8158.4	15398	7715.7	30102	34868	38943	34579	20399	24603
A2NJV5;A0A0A0MRZ7;A0A075B6S2;A0A075B6S6;A0A075B6P5;A0A087WW87;P06310;P01615;P01614		IGKV A18;IGKV2D-26;IGKV2D-29	sp|A2NJV5|KV229_HUMAN Immunoglobulin kappa variable 2-29 OS=Homo sapiens OX=9606 GN=IGKV2-29 PE=3 SV=2;sp|A0A0A0MRZ7|KVD26_HUMAN Immunoglobulin kappa variable 2D-26 OS=Homo sapiens OX=9606 GN=IGKV2D-26 PE=3 SV=1;sp|A0A075B6S2|KVD29_HUMAN Immunoglobulin kap	6293100	6136300	6746100	6653600	6468900	6411900	5325300	4966600	4604300	4678400	4728600	4841600	4148300	4085000	4496200	4935600	5878900	6091700	6173800	5560900	4525200	4709700	4459400	4519800	4651500	4693000	5714200	5945300	6208300	5639900
A4UGR9-2;A4UGR9-3;A4UGR9;A4UGR9-8	Xin actin-binding repeat-containing protein 2	XIRP2	sp|A4UGR9-2|XIRP2_HUMAN Isoform 2 of Xin actin-binding repeat-containing protein 2 OS=Homo sapiens OX=9606 GN=XIRP2;sp|A4UGR9-3|XIRP2_HUMAN Isoform 3 of Xin actin-binding repeat-containing protein 2 OS=Homo sapiens OX=9606 GN=XIRP2;sp|A4UGR9|XIRP2_HUMAN Xi	1	1	1	75916	71894	1	78364	1	1	1	1	56275	61482	1	1	68427	1	73301	1	1	1	1	1	1	1	1	1	1	1	1
B5ME19;Q99613;Q99613-2	Eukaryotic translation initiation factor 3 subunit C-like protein;Eukaryotic translation initiation factor 3 subunit C	EIF3CL;EIF3C	sp|B5ME19|EIFCL_HUMAN Eukaryotic translation initiation factor 3 subunit C-like protein OS=Homo sapiens OX=9606 GN=EIF3CL PE=1 SV=1;sp|Q99613|EIF3C_HUMAN Eukaryotic translation initiation factor 3 subunit C OS=Homo sapiens OX=9606 GN=EIF3C PE=1 SV=1;sp|Q99	10075	12803	5644.1	11449	8052	9889.4	7478.6	6197.9	4477.2	3530.7	9861.1	8210	8916	8275.3	7835	9665.3	9677.8	9553	8683.7	8824.1	8997.9	8945.6	7783.4	8376.9	7737.5	8560.8	5957.3	4244.8	8155.8	8903
E9PRG8	Uncharacterized protein C11orf98	C11orf98	sp|E9PRG8|CK098_HUMAN Uncharacterized protein C11orf98 OS=Homo sapiens OX=9606 GN=C11orf98 PE=4 SV=2	10867	9949.5	1	7243.2	1	8391.9	6404.2	5684.1	4735.7	3722.8	1	1	1	4552.6	13202	13177	4227.9	3748.5	7979.9	8439	4389.9	5919	5145.9	4820.2	6627.1	6878.3	8704.3	10087	4628	3460.9
G2XKQ0;P63165	Small ubiquitin-related modifier;Small ubiquitin-related modifier 1	SUMO1	sp|G2XKQ0|SUMO5_HUMAN Small ubiquitin-related modifier 5 OS=Homo sapiens OX=9606 GN=SUMO1P1 PE=1 SV=2;sp|P63165|SUMO1_HUMAN Small ubiquitin-related modifier 1 OS=Homo sapiens OX=9606 GN=SUMO1 PE=1 SV=1	1	1	1	1	1	1	1	6654.7	1	1	5326.5	1	1	1	1	1	877.31	1	1	1	1	1	1	1	1	1	1	1	1	1
L0R6Q1		SLC35A4	sp|L0R6Q1|S35U4_HUMAN SLC35A4 upstream open reading frame protein OS=Homo sapiens OX=9606 GN=SLC35A4 PE=3 SV=1	1	1	1	1	1	1	8417.6	5625.7	11885	13090	4491.3	6535.5	2638.5	3102.1	1	1	1	1	1	1	1	1	1	1	1	1	1	1	1	1
O00159-2;O00159-3;O00159	Unconventional myosin-Ic	MYO1C	sp|O00159-2|MYO1C_HUMAN Isoform 2 of Unconventional myosin-Ic OS=Homo sapiens OX=9606 GN=MYO1C;sp|O00159-3|MYO1C_HUMAN Isoform 3 of Unconventional myosin-Ic OS=Homo sapiens OX=9606 GN=MYO1C;sp|O00159|MYO1C_HUMAN Unconventional myosin-Ic OS=Homo sapiens OX=	1	1	1	1	1	1	25398	27356	17127	15860	15467	14256	41807	42804	29383	34430	14827	18518	9696.5	8879.9	21191	18550	6880.5	7497.4	24920	25407	20762	19921	23583	22979
O00161;O00161-2	Synaptosomal-associated protein 23	SNAP23	sp|O00161|SNP23_HUMAN Synaptosomal-associated protein 23 OS=Homo sapiens OX=9606 GN=SNAP23 PE=1 SV=1;sp|O00161-2|SNP23_HUMAN Isoform SNAP-23b of Synaptosomal-associated protein 23 OS=Homo sapiens OX=9606 GN=SNAP23	1	1	1	1	1	1	43302	48463	50805	47845	40110	41776	60557	61930	42308	46472	46301	46336	19170	26138	30827	29433	31325	31775	34524	34740	41079	39891	36773	35282
O00165-5;O00165-3;O00165;O00165-2;O00165-4	HCLS1-associated protein X-1	HAX1	sp|O00165-5|HAX1_HUMAN Isoform 5 of HCLS1-associated protein X-1 OS=Homo sapiens OX=9606 GN=HAX1;sp|O00165-3|HAX1_HUMAN Isoform 3 of HCLS1-associated protein X-1 OS=Homo sapiens OX=9606 GN=HAX1;sp|O00165|HAX1_HUMAN HCLS1-associated protein X-1 OS=Homo sapi	1	1	1	1	1	1	14940	16472	17938	18707	11430	12674	12462	15665	11611	11075	11252	8710.7	7401.8	6224.2	5457.6	5680.7	5192	5051	2739	2755	1	1	2774.5	2648.3
O00203-3;O00203	AP-3 complex subunit beta-1	AP3B1	sp|O00203-3|AP3B1_HUMAN Isoform 2 of AP-3 complex subunit beta-1 OS=Homo sapiens OX=9606 GN=AP3B1;sp|O00203|AP3B1_HUMAN AP-3 complex subunit beta-1 OS=Homo sapiens OX=9606 GN=AP3B1 PE=1 SV=3	1	1359	1	1	1	1	3434.3	3562.3	1	1	1	1	1	1	7677.4	9671.4	1	4406	8513.6	7301.4	7133.3	5644.7	4172	3520.2	3447.3	6517.4	8318	6239.6	1	4669.5
O00231;O00231-2	26S proteasome non-ATPase regulatory subunit 11	PSMD11	sp|O00231|PSD11_HUMAN 26S proteasome non-ATPase regulatory subunit 11 OS=Homo sapiens OX=9606 GN=PSMD11 PE=1 SV=3;sp|O00231-2|PSD11_HUMAN Isoform 2 of 26S proteasome non-ATPase regulatory subunit 11 OS=Homo sapiens OX=9606 GN=PSMD11	7010.5	6975.1	1	1	1	1	4509.4	5147.6	8182.1	7556.5	10457	9977.8	9865.9	9475.7	8682.6	11496	9149.9	9919.4	8687.6	8274.7	7988.5	7620.5	11304	9776.6	9615.9	8885.1	6957.1	4587.2	8164.5	7756.7
O00232;O00232-2	26S proteasome non-ATPase regulatory subunit 12	PSMD12	sp|O00232|PSD12_HUMAN 26S proteasome non-ATPase regulatory subunit 12 OS=Homo sapiens OX=9606 GN=PSMD12 PE=1 SV=3;sp|O00232-2|PSD12_HUMAN Isoform 2 of 26S proteasome non-ATPase regulatory subunit 12 OS=Homo sapiens OX=9606 GN=PSMD12	1	8357.8	1	1204.7	1	1	1	4555.6	9662.9	10630	13107	12906	10689	12963	8771.3	9709.3	7090.7	8893.2	7225.6	8316.8	8515.6	8346	15175	12661	7812.6	10873	6384.1	3679.5	6633.3	7999.4
O00268	Transcription initiation factor TFIID subunit 4	TAF4	sp|O00268|TAF4_HUMAN Transcription initiation factor TFIID subunit 4 OS=Homo sapiens OX=9606 GN=TAF4 PE=1 SV=2	7115.6	6941.2	4131.1	9559.8	6362.2	11308	2495.1	2500.7	1840.6	1	1354.9	1547.2	5984.7	6322.7	9372.5	10564	6748.7	5461.5	8790.8	8632.2	8736.1	5990.2	8553.3	7824.9	8937.3	7885.7	9351.9	9723.2	12409	13771
O00299	Chloride intracellular channel protein 1	CLIC1	sp|O00299|CLIC1_HUMAN Chloride intracellular channel protein 1 OS=Homo sapiens OX=9606 GN=CLIC1 PE=1 SV=4	6170.9	2747.4	1	1	1	1	4550.4	1991.1	6633	6418.6	3937.8	1	5168.7	4698.3	6161.1	11459	1	3782.3	1	1	1568.4	1	2832.7	1	1	1	1	1	1	1
O00303	Eukaryotic translation initiation factor 3 subunit F	EIF3F	sp|O00303|EIF3F_HUMAN Eukaryotic translation initiation factor 3 subunit F OS=Homo sapiens OX=9606 GN=EIF3F PE=1 SV=1	18312	19078	4268.1	12014	4644.1	1	1	2361.8	5690.5	5218.2	8056.6	9254.8	9311.3	11087	8729.8	8541.1	8475.7	9306	6135.1	8979.1	11439	10133	4355	8526.1	6523.9	6120.5	4076.4	3652.7	5671	1113.2
O00410;O00410-3;O00410-2	Importin-5	IPO5	sp|O00410|IPO5_HUMAN Importin-5 OS=Homo sapiens OX=9606 GN=IPO5 PE=1 SV=4;sp|O00410-3|IPO5_HUMAN Isoform 3 of Importin-5 OS=Homo sapiens OX=9606 GN=IPO5;sp|O00410-2|IPO5_HUMAN Isoform 2 of Importin-5 OS=Homo sapiens OX=9606 GN=IPO5	1	768.54	1	1	1	1	500910	500100	1233700	1243900	762710	718210	342630	336340	87659	83125	167220	182050	3818.2	2046.3	1579.4	1620.9	1521.9	1515.2	3621.3	3766.6	6645.2	6242.2	1208.9	1013.8
O00425	Insulin-like growth factor 2 mRNA-binding protein 3	IGF2BP3	sp|O00425|IF2B3_HUMAN Insulin-like growth factor 2 mRNA-binding protein 3 OS=Homo sapiens OX=9606 GN=IGF2BP3 PE=1 SV=2	1	1	1	1	1	1	1	1	1	1	1	1	1	1	1	1	691.48	1	1	1	7075	6488.7	1	1	1	1	1	1	1	462
O00443	Phosphatidylinositol 4-phosphate 3-kinase C2 domain-containing subunit alpha	PIK3C2A	sp|O00443|P3C2A_HUMAN Phosphatidylinositol 4-phosphate 3-kinase C2 domain-containing subunit alpha OS=Homo sapiens OX=9606 GN=PIK3C2A PE=1 SV=2	1	1	1	1	13257	1	1	1	1	1	1	1	1	8656.4	1	1	13006	11399	1	1	8904.6	1	1	1	1	8349.8	1	1	1	1
O00459;Q92569-3;Q92569-2;Q92569	Phosphatidylinositol 3-kinase regulatory subunit beta	PIK3R2	sp|O00459|P85B_HUMAN Phosphatidylinositol 3-kinase regulatory subunit beta OS=Homo sapiens OX=9606 GN=PIK3R2 PE=1 SV=2	1	1	1	1	1	1	6484	8062.2	6861.2	6221.1	7870.4	7300.2	6690.2	6631.9	5460.6	4337.5	2688.3	3405.5	1	2619	3955.7	4546.2	2934.7	2320	4345.8	3914.1	2614.6	1	1	3603
O00479	High mobility group nucleosome-binding domain-containing protein 4	HMGN4	sp|O00479|HMGN4_HUMAN High mobility group nucleosome-binding domain-containing protein 4 OS=Homo sapiens OX=9606 GN=HMGN4 PE=1 SV=3	6006	5184.7	1	6241.4	4589.7	1	1	1	3537.2	3685.9	4315.8	3690.4	4874.7	6318.7	5890.7	3961.9	2185.7	2116.9	4297.5	7474.9	4471.9	4343.4	4833.8	5777.7	5933	5537.7	4455.4	4781.5	4811.5	5477.6
O00483	Cytochrome c oxidase subunit NDUFA4	NDUFA4	sp|O00483|NDUA4_HUMAN Cytochrome c oxidase subunit NDUFA4 OS=Homo sapiens OX=9606 GN=NDUFA4 PE=1 SV=1	5026.8	6845.1	1	1	1	1	9419.9	9417.6	10930	12436	7802.3	8190	6504.4	7425.9	8576.8	9897.3	11959	10540	10067	9296.2	7775.5	8312.6	8115.4	6563.1	6800.3	7010.6	7243.5	6978.4	5908.1	6310.3
O00487	26S proteasome non-ATPase regulatory subunit 14	PSMD14	sp|O00487|PSDE_HUMAN 26S proteasome non-ATPase regulatory subunit 14 OS=Homo sapiens OX=9606 GN=PSMD14 PE=1 SV=1	9256.3	6278.8	1	1	1	1	4792.8	1	5169.6	4509.8	6405.1	6232.1	5532.9	6795.8	7157.7	9100.2	5538.7	4853	4876.6	4737.2	5930.5	5758.6	7069.1	7337.5	7001.6	5572.4	1	1	2755.6	3379.4
O00488	Zinc finger protein 593	ZNF593	sp|O00488|ZN593_HUMAN Zinc finger protein 593 OS=Homo sapiens OX=9606 GN=ZNF593 PE=1 SV=2	1	2557.4	1	1	1	3271.1	1	1364.7	1	1	1	1	2476.7	2558.8	8548.5	8492.5	1	1	5305.2	6485.6	3180.9	3475.5	3293.9	2877.5	3633.4	3726.5	4420.7	1	3570.7	1
O00541-2;O00541	Pescadillo homolog	PES1	sp|O00541-2|PESC_HUMAN Isoform 2 of Pescadillo homolog OS=Homo sapiens OX=9606 GN=PES1;sp|O00541|PESC_HUMAN Pescadillo homolog OS=Homo sapiens OX=9606 GN=PES1 PE=1 SV=1	1	1	1	1	1	1	1	399.98	1	1	1	1	325.91	523.93	1	1	1	1	1023.6	1	9337.7	6013.6	790.38	1	1	801.06	1	1	1	1
O00566	U3 small nucleolar ribonucleoprotein protein MPP10	MPHOSPH10	sp|O00566|MPP10_HUMAN U3 small nucleolar ribonucleoprotein protein MPP10 OS=Homo sapiens OX=9606 GN=MPHOSPH10 PE=1 SV=2	1	1	1	1	1	1	1	1	1	1	1	1	1	1	1	1	1	1	1	1	2175.8	3005.5	1	1	1	1	1	1	1	1
O00567	Nucleolar protein 56	NOP56	sp|O00567|NOP56_HUMAN Nucleolar protein 56 OS=Homo sapiens OX=9606 GN=NOP56 PE=1 SV=4	1	1	1	1	1	1	433.02	1	1	1	1	367.94	202.68	938.51	1	1502.3	1	1	1	1	24374	19924	1	1	1237.7	824.01	1	1	2927.6	4295
O00571-2;O00571;O15523-2;O15523;O15523-3;Q9NQI0-3;Q9NQI0-2;Q9NQI0-4;Q9NQI0	ATP-dependent RNA helicase DDX3X;ATP-dependent RNA helicase DDX3Y	DDX3X;DDX3Y	sp|O00571-2|DDX3X_HUMAN Isoform 2 of ATP-dependent RNA helicase DDX3X OS=Homo sapiens OX=9606 GN=DDX3X;sp|O00571|DDX3X_HUMAN ATP-dependent RNA helicase DDX3X OS=Homo sapiens OX=9606 GN=DDX3X PE=1 SV=3;sp|O15523-2|DDX3Y_HUMAN Isoform 2 of ATP-dependent RNA	34897	36367	29228	32768	29192	29421	25667	25084	28750	30250	32814	34379	33118	29778	27244	28736	24215	27296	31189	30876	37296	36018	31850	31425	36677	37754	23985	24539	31922	31129
O14646-2;O14646	Chromodomain-helicase-DNA-binding protein 1	CHD1	sp|O14646-2|CHD1_HUMAN Isoform 2 of Chromodomain-helicase-DNA-binding protein 1 OS=Homo sapiens OX=9606 GN=CHD1;sp|O14646|CHD1_HUMAN Chromodomain-helicase-DNA-binding protein 1 OS=Homo sapiens OX=9606 GN=CHD1 PE=1 SV=2	7886.9	7189.2	4979.2	10838	11754	8624.2	8890.6	10819	7442.8	6643.9	9362.6	9419.4	9164.2	8539.6	16198	8933.2	11328	10630	11367	15047	9807.2	10464	8086.7	9037.1	6962.1	7300.2	12403	14102	10174	12507
O14654	Insulin receptor substrate 4	IRS4	sp|O14654|IRS4_HUMAN Insulin receptor substrate 4 OS=Homo sapiens OX=9606 GN=IRS4 PE=1 SV=1	1665.8	1159.1	424.9	763.62	1	1193.6	101070	99388	97860	94929	82774	82976	93064	91181	83882	90893	88354	80870	59820	54246	60973	62720	54886	55946	66618	70113	67798	67956	67896	66411
O14737;O14737-2	Programmed cell death protein 5	PDCD5	sp|O14737|PDCD5_HUMAN Programmed cell death protein 5 OS=Homo sapiens OX=9606 GN=PDCD5 PE=1 SV=3;sp|O14737-2|PDCD5_HUMAN Isoform 2 of Programmed cell death protein 5 OS=Homo sapiens OX=9606 GN=PDCD5	12325	4105.3	1	1	1	1	1	1	1	1	1	1	2054.1	2201.5	1732.3	1995.1	1	1	1	1	1661.2	1	3172.2	2575.4	5805.8	4042.4	1	1	1	1
O14744;O14744-2;O14744-5;O14744-3;O14744-4	Protein arginine N-methyltransferase 5;Protein arginine N-methyltransferase 5, N-terminally processed	PRMT5	sp|O14744|ANM5_HUMAN Protein arginine N-methyltransferase 5 OS=Homo sapiens OX=9606 GN=PRMT5 PE=1 SV=4;sp|O14744-2|ANM5_HUMAN Isoform 2 of Protein arginine N-methyltransferase 5 OS=Homo sapiens OX=9606 GN=PRMT5;sp|O14744-5|ANM5_HUMAN Isoform 5 of Protein a	595150	603370	646660	640980	558860	544900	197660	198760	146640	145660	170470	176370	182710	184080	245220	239720	238260	244960	390500	409050	368370	374110	428210	428400	395620	395600	410490	409220	488280	483480
O14828-2;O14828	Secretory carrier-associated membrane protein 3	SCAMP3	sp|O14828-2|SCAM3_HUMAN Isoform 2 of Secretory carrier-associated membrane protein 3 OS=Homo sapiens OX=9606 GN=SCAMP3;sp|O14828|SCAM3_HUMAN Secretory carrier-associated membrane protein 3 OS=Homo sapiens OX=9606 GN=SCAMP3 PE=1 SV=3	1	1	1	1	1	1	1	1	3785	3449.5	3319.6	3544.8	5481.2	3626.1	3195	2720.1	2438	1	1	1	1	1	1	2851.1	1	1	1	1	1	1
O14893;O14893-2;O14893-3	Gem-associated protein 2	GEMIN2	sp|O14893|GEMI2_HUMAN Gem-associated protein 2 OS=Homo sapiens OX=9606 GN=GEMIN2 PE=1 SV=1;sp|O14893-2|GEMI2_HUMAN Isoform 2 of Gem-associated protein 2 OS=Homo sapiens OX=9606 GN=GEMIN2;sp|O14893-3|GEMI2_HUMAN Isoform 3 of Gem-associated protein 2 OS=Homo	1	1	1	1	1	1	23848	19615	22969	22462	18043	18111	16806	16008	10060	11943	11710	9802.2	1	1	1	1	1	1	1	1085.5	2307	1	1499.2	1
O14925;Q5SRD1	Mitochondrial import inner membrane translocase subunit Tim23;Putative mitochondrial import inner membrane translocase subunit Tim23B	TIMM23;TIMM23B	sp|O14925|TIM23_HUMAN Mitochondrial import inner membrane translocase subunit Tim23 OS=Homo sapiens OX=9606 GN=TIMM23 PE=1 SV=1;sp|Q5SRD1|TI23B_HUMAN Putative mitochondrial import inner membrane translocase subunit Tim23B OS=Homo sapiens OX=9606 GN=TIMM23B	4411.4	3353.1	1	1580.3	1	1	10647	11537	11032	11916	9737.4	10422	7187.2	8352.7	10230	13236	7715.9	9726.2	11297	10726	11538	10446	8807.1	6605.6	4517.2	5764.5	7771	5366.2	6195.6	6674.4
O14929-2;O14929	Histone acetyltransferase type B catalytic subunit	HAT1	sp|O14929-2|HAT1_HUMAN Isoform B of Histone acetyltransferase type B catalytic subunit OS=Homo sapiens OX=9606 GN=HAT1;sp|O14929|HAT1_HUMAN Histone acetyltransferase type B catalytic subunit OS=Homo sapiens OX=9606 GN=HAT1 PE=1 SV=1	7178.1	3380.2	1	1	1	1	1	1	2303.1	1	1	1	2451.8	2817.5	1	2347.5	1	1	1	1	1922.7	3172.5	3133.2	3590.3	3614.7	1	1	1	1	1
O14936-5;O14936-3;O14936-4;O14936-6;O14936-2;O14936	Peripheral plasma membrane protein CASK	CASK	sp|O14936-5|CSKP_HUMAN Isoform 5 of Peripheral plasma membrane protein CASK OS=Homo sapiens OX=9606 GN=CASK;sp|O14936-3|CSKP_HUMAN Isoform 3 of Peripheral plasma membrane protein CASK OS=Homo sapiens OX=9606 GN=CASK;sp|O14936-4|CSKP_HUMAN Isoform 4 of Peri	1	1	1	1	1	1	1	1	1	543.18	1	1	3002.9	2957.6	1	1	1	1	1	1	782.24	1	1	1	1	1	1	1	1	1
O14979-3;O14979-2;O14979	Heterogeneous nuclear ribonucleoprotein D-like	HNRNPDL	sp|O14979-3|HNRDL_HUMAN Isoform 3 of Heterogeneous nuclear ribonucleoprotein D-like OS=Homo sapiens OX=9606 GN=HNRNPDL;sp|O14979-2|HNRDL_HUMAN Isoform 2 of Heterogeneous nuclear ribonucleoprotein D-like OS=Homo sapiens OX=9606 GN=HNRNPDL;sp|O14979|HNRDL_HU	1	1	1	1	1	1	1	1	1	1	1	1	1	1	1	1	1	1	1	1	6525.5	5347.5	1	1	1	1	1	1	1	1
O14980	Exportin-1	XPO1	sp|O14980|XPO1_HUMAN Exportin-1 OS=Homo sapiens OX=9606 GN=XPO1 PE=1 SV=1	1	2277.4	1	1	1	1	12500	10012	25776	20708	17795	15522	17576	14673	10047	11503	7952.3	10313	3780.6	4315.2	7455.6	5540.8	7838.4	7429.3	5852.5	9874.7	2245.3	2943.3	1	1
O15042;O15042-2;O15042-3	U2 snRNP-associated SURP motif-containing protein	U2SURP	sp|O15042|SR140_HUMAN U2 snRNP-associated SURP motif-containing protein OS=Homo sapiens OX=9606 GN=U2SURP PE=1 SV=2;sp|O15042-2|SR140_HUMAN Isoform 2 of U2 snRNP-associated SURP motif-containing protein OS=Homo sapiens OX=9606 GN=U2SURP;sp|O15042-3|SR140_H	141420	140830	155400	157780	158560	145600	137420	131070	97461	98430	103720	104140	93536	93630	137980	122110	119470	117960	153360	170050	118230	123980	118500	121770	100720	96407	150750	153850	130060	127820
O15269	Serine palmitoyltransferase 1	SPTLC1	sp|O15269|SPTC1_HUMAN Serine palmitoyltransferase 1 OS=Homo sapiens OX=9606 GN=SPTLC1 PE=1 SV=1	1	1	1	1	1	1	1	3634.6	7566.4	8718.1	7281.7	7322.9	6855.9	7289.9	6419.7	9042.2	5289.1	4497.6	1	4565.3	4258.2	4763.7	1	1	1867.8	1004.8	1	1	1	1
O15294;O15294-3;O15294-2;O15294-4	UDP-N-acetylglucosamine--peptide N-acetylglucosaminyltransferase 110 kDa subunit	OGT	sp|O15294|OGT1_HUMAN UDP-N-acetylglucosamine--peptide N-acetylglucosaminyltransferase 110 kDa subunit OS=Homo sapiens OX=9606 GN=OGT PE=1 SV=3;sp|O15294-3|OGT1_HUMAN Isoform 1 of UDP-N-acetylglucosamine--peptide N-acetylglucosaminyltransferase 110 kDa subu	34119	31872	20146	27021	22800	28836	3908.1	4959.9	2996.2	1726.3	4532.7	4569.8	6437.4	6595.5	7846.8	9826	6493.3	6329.6	14976	12319	10989	13029	12376	13787	7291.8	6309.4	7834.7	7868.4	12660	12514
O15371-2;O15371-3;O15371	Eukaryotic translation initiation factor 3 subunit D	EIF3D	sp|O15371-2|EIF3D_HUMAN Isoform 2 of Eukaryotic translation initiation factor 3 subunit D OS=Homo sapiens OX=9606 GN=EIF3D;sp|O15371-3|EIF3D_HUMAN Isoform 3 of Eukaryotic translation initiation factor 3 subunit D OS=Homo sapiens OX=9606 GN=EIF3D;sp|O15371|	16807	14658	1	10220	12174	4306.1	6591.8	6283.4	7309.6	6634.9	9166.7	9323.1	12998	11091	11193	8448.2	12082	8103.3	2631.1	12433	15940	12180	12325	12353	10375	12829	7160.3	7559.6	12631	12477
O15372	Eukaryotic translation initiation factor 3 subunit H	EIF3H	sp|O15372|EIF3H_HUMAN Eukaryotic translation initiation factor 3 subunit H OS=Homo sapiens OX=9606 GN=EIF3H PE=1 SV=1	16277	16570	15897	20262	14788	6930.6	8418.3	7193.9	9141.2	8912.2	10021	10172	11139	11875	11372	4123.2	10945	12339	2848.8	9877.7	8721.2	9386.5	9710.8	9045	10857	7885.2	8880.6	5651.9	10376	10974
O15397;O15397-2	Importin-8	IPO8	sp|O15397|IPO8_HUMAN Importin-8 OS=Homo sapiens OX=9606 GN=IPO8 PE=1 SV=2;sp|O15397-2|IPO8_HUMAN Isoform 2 of Importin-8 OS=Homo sapiens OX=9606 GN=IPO8	1	1	1	1	1	1	303790	296020	399600	384280	301340	293100	213060	206930	137960	124320	179490	192010	15550	21785	13243	14599	15857	17001	32159	32168	53412	58123	26757	25663
O43143	Pre-mRNA-splicing factor ATP-dependent RNA helicase DHX15	DHX15	sp|O43143|DHX15_HUMAN Pre-mRNA-splicing factor ATP-dependent RNA helicase DHX15 OS=Homo sapiens OX=9606 GN=DHX15 PE=1 SV=2	11986	17881	7418.3	10459	14629	10231	8423.3	7463.5	10670	12043	14519	12463	18991	18465	13803	10904	12732	12874	5014.4	15790	25145	24170	15012	14351	18007	16999	11704	7227.1	15383	18654
O43149	Zinc finger ZZ-type and EF-hand domain-containing protein 1	ZZEF1	sp|O43149|ZZEF1_HUMAN Zinc finger ZZ-type and EF-hand domain-containing protein 1 OS=Homo sapiens OX=9606 GN=ZZEF1 PE=1 SV=6	1	1	1	1	1	1	1	1	2493.1	2234.7	738.9	1	1	1	1	1	1	1	1	1	1	1	1	1	1	1	1	1	1	1
O43167-2;O43167	Zinc finger and BTB domain-containing protein 24	ZBTB24	sp|O43167-2|ZBT24_HUMAN Isoform 2 of Zinc finger and BTB domain-containing protein 24 OS=Homo sapiens OX=9606 GN=ZBTB24;sp|O43167|ZBT24_HUMAN Zinc finger and BTB domain-containing protein 24 OS=Homo sapiens OX=9606 GN=ZBTB24 PE=1 SV=2	14828	14133	15974	17445	17580	18135	1976.1	1761.6	1	1015.1	1	1	1	1	4113.7	4713.7	2613.9	1	8440.2	8649.7	6805.1	9245.5	9736.2	8194.9	7332.6	5869.4	6612.7	3139.7	11250	12239
O43175	D-3-phosphoglycerate dehydrogenase	PHGDH	sp|O43175|SERA_HUMAN D-3-phosphoglycerate dehydrogenase OS=Homo sapiens OX=9606 GN=PHGDH PE=1 SV=4	29907	25818	17600	16228	11790	14649	38250	40364	39024	40860	35865	37161	37885	38207	38946	44467	40707	38159	52814	39900	37498	38550	41205	40863	29380	30579	26577	25056	28139	26340
O43242;O43242-2	26S proteasome non-ATPase regulatory subunit 3	PSMD3	sp|O43242|PSMD3_HUMAN 26S proteasome non-ATPase regulatory subunit 3 OS=Homo sapiens OX=9606 GN=PSMD3 PE=1 SV=2;sp|O43242-2|PSMD3_HUMAN Isoform 2 of 26S proteasome non-ATPase regulatory subunit 3 OS=Homo sapiens OX=9606 GN=PSMD3	6343.4	7268.6	1	3796.3	1	1	7553.9	7655.9	6303	5699.5	8015.1	8075.5	7489.2	6868	7876.2	7441.8	4480.6	6850.1	5646.1	4516.3	8038	6634.3	8093.6	8080.8	7033.4	7033.5	2427.1	4570.4	4915.5	5699.2
O43264-2;O43264	Centromere/kinetochore protein zw10 homolog	ZW10	sp|O43264-2|ZW10_HUMAN Isoform 2 of Centromere/kinetochore protein zw10 homolog OS=Homo sapiens OX=9606 GN=ZW10;sp|O43264|ZW10_HUMAN Centromere/kinetochore protein zw10 homolog OS=Homo sapiens OX=9606 GN=ZW10 PE=1 SV=3	1	1	1	1	1	1	7279	9966.9	17559	15858	8005.7	14536	11659	11495	12662	12261	6000.6	6417.8	1	2823.4	3398.8	4871.7	2975.8	3678.2	2558.2	3063.5	1	1	1	1
O43290	U4/U6.U5 tri-snRNP-associated protein 1	SART1	sp|O43290|SNUT1_HUMAN U4/U6.U5 tri-snRNP-associated protein 1 OS=Homo sapiens OX=9606 GN=SART1 PE=1 SV=1	106330	100230	131120	137380	147350	142450	94589	89818	70145	68323	65389	65702	79960	80827	116880	122420	91537	91915	138250	139660	106780	105570	103780	103650	109920	109990	132990	141430	124610	120010
O43324-2;O43324	Eukaryotic translation elongation factor 1 epsilon-1	EEF1E1	sp|O43324-2|MCA3_HUMAN Isoform 2 of Eukaryotic translation elongation factor 1 epsilon-1 OS=Homo sapiens OX=9606 GN=EEF1E1;sp|O43324|MCA3_HUMAN Eukaryotic translation elongation factor 1 epsilon-1 OS=Homo sapiens OX=9606 GN=EEF1E1 PE=1 SV=1	5656.3	2931.4	1	1	1	1	1	1	3495.1	3448.3	5337.9	3676.3	2991.2	3787.2	2959.2	5576.8	1	2820.8	1360.1	2059.7	4034.7	2029.7	3947.1	2676.7	2951.4	3736.2	1	2013.4	1	1844.5
O43390-4;O43390;O43390-2;O43390-3	Heterogeneous nuclear ribonucleoprotein R	HNRNPR	sp|O43390-4|HNRPR_HUMAN Isoform 4 of Heterogeneous nuclear ribonucleoprotein R OS=Homo sapiens OX=9606 GN=HNRNPR;sp|O43390|HNRPR_HUMAN Heterogeneous nuclear ribonucleoprotein R OS=Homo sapiens OX=9606 GN=HNRNPR PE=1 SV=1;sp|O43390-2|HNRPR_HUMAN Isoform 2 o	1	1	1	1	1	1	8831.4	1	1	1	1	1	9808.8	1	1	14492	13298	12044	4408.1	4371.4	44534	35123	7277.9	5343.9	8936.1	12089	4594.7	1	19746	19406
O43427-2;O43427	Acidic fibroblast growth factor intracellular-binding protein	FIBP	sp|O43427-2|FIBP_HUMAN Isoform Short of Acidic fibroblast growth factor intracellular-binding protein OS=Homo sapiens OX=9606 GN=FIBP;sp|O43427|FIBP_HUMAN Acidic fibroblast growth factor intracellular-binding protein OS=Homo sapiens OX=9606 GN=FIBP PE=1 SV	1	1	1	1	1	1	3819.8	4205.3	19328	20308	13906	13288	10936	11555	4822.3	3635.2	6042.8	8531.6	1	2549	3110.6	1748	1730.6	2178.1	6570.4	7371.5	4203.5	3572.4	2277.8	1215.4
O43491;O43491-3;O43491-2	Band 4.1-like protein 2	EPB41L2	sp|O43491|E41L2_HUMAN Band 4.1-like protein 2 OS=Homo sapiens OX=9606 GN=EPB41L2 PE=1 SV=1;sp|O43491-3|E41L2_HUMAN Isoform 3 of Band 4.1-like protein 2 OS=Homo sapiens OX=9606 GN=EPB41L2;sp|O43491-2|E41L2_HUMAN Isoform 2 of Band 4.1-like protein 2 OS=Homo	17940	17228	25082	26608	25740	24055	54066	54209	55360	55164	56180	58483	83523	84691	59162	67389	59409	59132	38717	29012	42735	49864	45720	38172	46641	42363	45002	43853	51663	51674
O43491-4	Band 4.1-like protein 2	EPB41L2	sp|O43491-4|E41L2_HUMAN Isoform 4 of Band 4.1-like protein 2 OS=Homo sapiens OX=9606 GN=EPB41L2	1	1	1	1	1	1	1	1	1	1	1	1	2519.3	1	1	1	1	1	1	1	1	1343.7	1	1	1	1	1	1	1	1
O43504	Ragulator complex protein LAMTOR5	LAMTOR5	sp|O43504|LTOR5_HUMAN Ragulator complex protein LAMTOR5 OS=Homo sapiens OX=9606 GN=LAMTOR5 PE=1 SV=1	1034.3	1	1	1	1	1	84305	83054	69881	70197	86099	85815	69528	68981	52112	51051	62883	70020	18927	22910	14869	15686	21274	20139	30997	30710	37003	36579	26149	24571
O43592	Exportin-T	XPOT	sp|O43592|XPOT_HUMAN Exportin-T OS=Homo sapiens OX=9606 GN=XPOT PE=1 SV=2	1	1	1	1	1	1	9245.6	5447.6	17944	14658	10884	10032	4677.9	3557.8	3016.6	2804.2	5190.9	3490.6	1299.9	971.11	1399.2	1280	1	1	1	1	1	1	1	1
O43663-3;O43663-2;O43663-4;O43663	Protein regulator of cytokinesis 1	PRC1	sp|O43663-3|PRC1_HUMAN Isoform 3 of Protein regulator of cytokinesis 1 OS=Homo sapiens OX=9606 GN=PRC1;sp|O43663-2|PRC1_HUMAN Isoform 2 of Protein regulator of cytokinesis 1 OS=Homo sapiens OX=9606 GN=PRC1;sp|O43663-4|PRC1_HUMAN Isoform 4 of Protein regula	36102	23026	20695	17529	19085	17822	11570	9861.6	15027	16352	19605	19156	18603	20254	24008	28172	23475	27633	35272	31509	22798	20328	25359	24122	24720	27621	27447	28256	24162	21871
O43684-2;O43684	Mitotic checkpoint protein BUB3	BUB3	sp|O43684-2|BUB3_HUMAN Isoform 2 of Mitotic checkpoint protein BUB3 OS=Homo sapiens OX=9606 GN=BUB3;sp|O43684|BUB3_HUMAN Mitotic checkpoint protein BUB3 OS=Homo sapiens OX=9606 GN=BUB3 PE=1 SV=1	4877.8	6944.4	2413	5480.6	1	1	5118.9	4139.9	5710.1	3454.3	4203.8	6832.3	7362.9	6527.7	7069.8	4416.1	3627.3	2577.8	4640.7	5859.8	3880.6	5030.4	4266.8	3807.3	4737.6	4855	3689.6	1	1	4314.3
O43719	HIV Tat-specific factor 1	HTATSF1	sp|O43719|HTSF1_HUMAN HIV Tat-specific factor 1 OS=Homo sapiens OX=9606 GN=HTATSF1 PE=1 SV=1	489.6	1	1	1	1	1	1	1	1	1	1	1	1272.6	1164.7	1	1	1	1	1	1	1	1	1231.2	1	1	1	1	1	1	1
O43795;O43795-2;Q9UBC5	Unconventional myosin-Ib	MYO1B	sp|O43795|MYO1B_HUMAN Unconventional myosin-Ib OS=Homo sapiens OX=9606 GN=MYO1B PE=1 SV=3;sp|O43795-2|MYO1B_HUMAN Isoform 2 of Unconventional myosin-Ib OS=Homo sapiens OX=9606 GN=MYO1B	1	1	1	1	1	1	12267	15419	13548	13974	12264	12225	21812	20969	15006	17836	13339	12170	6882.6	5353.6	12974	14157	9478.3	9685.9	17756	15203	11607	11200	12918	13449
O43809	Cleavage and polyadenylation specificity factor subunit 5	NUDT21	sp|O43809|CPSF5_HUMAN Cleavage and polyadenylation specificity factor subunit 5 OS=Homo sapiens OX=9606 GN=NUDT21 PE=1 SV=1	265390	284550	338500	354540	380290	379000	274470	266730	223190	228520	227500	232080	281270	290430	336440	329010	292100	278520	418680	426430	285380	289510	283790	286370	325950	315320	429870	439540	348580	323160
O43813	LanC-like protein 1	LANCL1	sp|O43813|LANC1_HUMAN Glutathione S-transferase LANCL1 OS=Homo sapiens OX=9606 GN=LANCL1 PE=1 SV=1	3495.4	3055	1	1	1	1	1	1	1	1	2767.7	2648.9	2676	1	3339	1	1	1	1	1	1	1	1	2734	1	1	2175.1	1	1	1
O43852;O43852-3;O43852-13;O43852-14;O43852-15;O43852-11;O43852-10;O43852-5;O43852-6;O43852-2;O43852-4	Calumenin	CALU	sp|O43852|CALU_HUMAN Calumenin OS=Homo sapiens OX=9606 GN=CALU PE=1 SV=2;sp|O43852-3|CALU_HUMAN Isoform 3 of Calumenin OS=Homo sapiens OX=9606 GN=CALU;sp|O43852-13|CALU_HUMAN Isoform 13 of Calumenin OS=Homo sapiens OX=9606 GN=CALU;sp|O43852-14|CALU_HUMAN I	29589	1	44416	1	49089	56192	43663	43172	32210	31940	26023	35310	41285	29199	34876	39718	44992	42930	62533	40749	34364	33218	36765	37353	29896	34139	42128	41750	39186	1
O60231	Putative pre-mRNA-splicing factor ATP-dependent RNA helicase DHX16	DHX16	sp|O60231|DHX16_HUMAN Pre-mRNA-splicing factor ATP-dependent RNA helicase DHX16 OS=Homo sapiens OX=9606 GN=DHX16 PE=1 SV=2	1	1	1	1	1	1	1	1	1	1	1	3117.8	4380.5	3677.6	8340	6899.4	1	1	1	7443.9	7023.9	7495.6	1	1	1	6243.5	1	5535.1	4161.4	1
O60256;O60256-3;O60256-2;O60256-4	Phosphoribosyl pyrophosphate synthase-associated protein 2	PRPSAP2	sp|O60256|KPRB_HUMAN Phosphoribosyl pyrophosphate synthase-associated protein 2 OS=Homo sapiens OX=9606 GN=PRPSAP2 PE=1 SV=1;sp|O60256-3|KPRB_HUMAN Isoform 3 of Phosphoribosyl pyrophosphate synthase-associated protein 2 OS=Homo sapiens OX=9606 GN=PRPSAP2;s	93270	85045	90123	88888	64218	56414	4557.4	2799.2	3872.4	1580.6	10345	11597	9307.8	7802.2	9543.3	2764.7	5159.2	4674.1	45569	58169	58555	57389	65484	65694	17276	16214	17788	17347	27285	27873
O60264;P28370-2;P28370	SWI/SNF-related matrix-associated actin-dependent regulator of chromatin subfamily A member 5;Probable global transcription activator SNF2L1	SMARCA5;SMARCA1	sp|O60264|SMCA5_HUMAN SWI/SNF-related matrix-associated actin-dependent regulator of chromatin subfamily A member 5 OS=Homo sapiens OX=9606 GN=SMARCA5 PE=1 SV=1;sp|P28370-2|SMCA1_HUMAN Isoform 2 of Probable global transcription activator SNF2L1 OS=Homo sap	1	1	1	1	1	1	1	1	1	1	1	1	1	1	1	1	1	1	1	1	3750.5	4403.7	1	1	1	1	1	1	1	1
O60506-4;O60506-3;O60506-2;O60506;O60506-5	Heterogeneous nuclear ribonucleoprotein Q	SYNCRIP	sp|O60506-4|HNRPQ_HUMAN Isoform 4 of Heterogeneous nuclear ribonucleoprotein Q OS=Homo sapiens OX=9606 GN=SYNCRIP;sp|O60506-3|HNRPQ_HUMAN Isoform 3 of Heterogeneous nuclear ribonucleoprotein Q OS=Homo sapiens OX=9606 GN=SYNCRIP;sp|O60506-2|HNRPQ_HUMAN Isof	6224.7	4708.5	1	1	1	1	5008.3	4302	4975.3	1	6806.6	6993.9	5440	5830.5	7042.5	9886.6	6071.3	7225.2	1	1	17818	16075	6386.4	5755	10830	14419	1	1	9277.6	8583.5
O60518	Ran-binding protein 6	RANBP6	sp|O60518|RNBP6_HUMAN Ran-binding protein 6 OS=Homo sapiens OX=9606 GN=RANBP6 PE=1 SV=2	1	1	1	1	1	1	66975	66086	142230	139660	60723	55974	32626	34129	12555	14964	15847	15387	1	1	1	1	1	1	1	1	1	1	1	1
O60716-32;O60716-31;O60716-2;O60716-4;O60716-6;O60716-3;O60716-5;O60716-7;O60716-9;O60716-8;O60716-10;O60716-12;O60716-14;O60716-11;O60716-13;O60716-17;O60716-15;O60716-18;O60716-16;O60716-20;O60716-22;O60716-19;O60716-21;O60716-23;O60716-24;O60716-25;O60716-26;O60716-28;O60716-30;O60716-27;O60716-29;O60716	Catenin delta-1	CTNND1	sp|O60716-32|CTND1_HUMAN Isoform 4 of Catenin delta-1 OS=Homo sapiens OX=9606 GN=CTNND1;sp|O60716-31|CTND1_HUMAN Isoform 4C of Catenin delta-1 OS=Homo sapiens OX=9606 GN=CTNND1;sp|O60716-2|CTND1_HUMAN Isoform 1AB of Catenin delta-1 OS=Homo sapiens OX=9606	1	1	1	1	1	1	2470	2917.5	5694.6	4998.3	5077.2	5451.5	9157.3	10517	7564.3	6620.9	5384.6	8538.8	1	2096	3047.7	3282.1	2912.5	2296.8	3613.7	4875.3	2084	2228.5	2966.1	2679.3
O60762	Dolichol-phosphate mannosyltransferase subunit 1	DPM1	sp|O60762|DPM1_HUMAN Dolichol-phosphate mannosyltransferase subunit 1 OS=Homo sapiens OX=9606 GN=DPM1 PE=1 SV=1	2806.3	2766.1	1	1	1	1	8899.6	12135	19354	24662	16952	16136	14410	13579	13300	14104	11772	13601	11042	12364	11918	12265	10446	10790	7168.7	6367.5	8294.8	6217	7274.2	6863.6
O60832-2;O60832	H/ACA ribonucleoprotein complex subunit 4	DKC1	sp|O60832-2|DKC1_HUMAN Isoform 3 of H/ACA ribonucleoprotein complex subunit DKC1 OS=Homo sapiens OX=9606 GN=DKC1;sp|O60832|DKC1_HUMAN H/ACA ribonucleoprotein complex subunit DKC1 OS=Homo sapiens OX=9606 GN=DKC1 PE=1 SV=3	4643.9	15020	3542.7	2515	13436	11807	15919	13837	11680	12085	10420	11507	8060.7	7532.8	15825	3859.9	6912.3	5110.8	1	24170	33756	30612	12978	10854	8406	9577.3	18790	16742	10511	13492
O60841	Eukaryotic translation initiation factor 5B	EIF5B	sp|O60841|IF2P_HUMAN Eukaryotic translation initiation factor 5B OS=Homo sapiens OX=9606 GN=EIF5B PE=1 SV=4	97661	92821	101670	100360	105290	88649	83781	93627	78139	79162	75977	74098	80907	85701	115370	101890	88711	95277	117140	153010	95649	97565	85486	81985	88556	96968	140640	141790	109820	101280
O60884	DnaJ homolog subfamily A member 2	DNAJA2	sp|O60884|DNJA2_HUMAN DnaJ homolog subfamily A member 2 OS=Homo sapiens OX=9606 GN=DNAJA2 PE=1 SV=1	894.54	1	1	1	1	1	12971	12290	23871	13107	19107	17013	19303	19522	8573.3	8311.1	2595	5871.2	8453.9	8671.7	8883.7	9940.5	9413.4	8014.4	3317.2	4788.4	853.33	3931.6	4020.9	7039.7
O60925	Prefoldin subunit 1	PFDN1	sp|O60925|PFD1_HUMAN Prefoldin subunit 1 OS=Homo sapiens OX=9606 GN=PFDN1 PE=1 SV=2	4268.6	1	1	1	1	1	1	1	1	1	1	3199.3	2732.8	3852.9	1	3083.3	1	1	3118.9	3381.7	4314.9	4098.6	5208.9	1	4262.2	3642.9	1	1	1	1
O75122-3;O75122;O75122-2	CLIP-associating protein 2	CLASP2	sp|O75122-3|CLAP2_HUMAN Isoform 3 of CLIP-associating protein 2 OS=Homo sapiens OX=9606 GN=CLASP2;sp|O75122|CLAP2_HUMAN CLIP-associating protein 2 OS=Homo sapiens OX=9606 GN=CLASP2 PE=1 SV=3	7170.2	6776.3	4796.9	8024.8	1	8821.5	13740	13231	11218	10035	12603	12911	17690	19408	19967	22658	15223	17013	16440	13521	12845	13423	17807	16619	12788	13653	16146	22078	28012	30905
O75131	Copine-3	CPNE3	sp|O75131|CPNE3_HUMAN Copine-3 OS=Homo sapiens OX=9606 GN=CPNE3 PE=1 SV=1	3510.5	6298.9	1	1	1	1	1	1	1	1	1	1	1	1	1	1	1	1	1	1	1	1	1	1	1	1	1	1	1	1
O75155;O75155-2	Cullin-associated NEDD8-dissociated protein 2	CAND2	sp|O75155|CAND2_HUMAN Cullin-associated NEDD8-dissociated protein 2 OS=Homo sapiens OX=9606 GN=CAND2 PE=1 SV=3;sp|O75155-2|CAND2_HUMAN Isoform 2 of Cullin-associated NEDD8-dissociated protein 2 OS=Homo sapiens OX=9606 GN=CAND2	1	1	1	1	1	1	252400	254150	371040	373930	221980	209080	144180	151120	87033	101580	117670	119930	63856	58389	48942	46137	39403	40674	8257.4	8086.6	14794	14798	6699.3	7713.9
O75190-4;O75190-3;O75190;Q8NHS0;O75190-2;P25686-2;P25686	DnaJ homolog subfamily B member 6;DnaJ homolog subfamily B member 8;DnaJ homolog subfamily B member 2	DNAJB6;DNAJB8;DNAJB2	sp|O75190-4|DNJB6_HUMAN Isoform D of DnaJ homolog subfamily B member 6 OS=Homo sapiens OX=9606 GN=DNAJB6;sp|O75190-3|DNJB6_HUMAN Isoform C of DnaJ homolog subfamily B member 6 OS=Homo sapiens OX=9606 GN=DNAJB6;sp|O75190|DNJB6_HUMAN DnaJ homolog subfamily B	1	1	1	1	1	1	4635.9	5483.3	5231.8	4993.6	4128.9	4603.4	4408.3	3887.4	5026.1	6060	4376.6	3317.2	1	4448.7	3724.6	3914.1	3580.4	3621.9	1	2947.3	3179.4	1	1	3642
O75223;O75223-3	Gamma-glutamylcyclotransferase	GGCT	sp|O75223|GGCT_HUMAN Gamma-glutamylcyclotransferase OS=Homo sapiens OX=9606 GN=GGCT PE=1 SV=1;sp|O75223-3|GGCT_HUMAN Isoform 3 of Gamma-glutamylcyclotransferase OS=Homo sapiens OX=9606 GN=GGCT	1	1	1	1	4825	4444.4	1	1	1	1	1	1	1	1	1	1	1	1	1	1	1	1	1	1	1	1	1	1	1	1
O75347	Tubulin-specific chaperone A	TBCA	sp|O75347|TBCA_HUMAN Tubulin-specific chaperone A OS=Homo sapiens OX=9606 GN=TBCA PE=1 SV=3	15519	18607	1	1175.6	1	1	1	1	580.12	1	882.37	1031.8	928.15	1417.1	1	1	1	1	1	1	412.48	517.53	2312.1	2310.2	11719	12847	1	1	1	1
O75348;O95670-2;O95670	V-type proton ATPase subunit G 1	ATP6V1G1	sp|O75348|VATG1_HUMAN V-type proton ATPase subunit G 1 OS=Homo sapiens OX=9606 GN=ATP6V1G1 PE=1 SV=3	1	1	1	1	1	1	38752	38634	29121	30390	32557	27216	18190	15954	10747	13676	11113	13068	1	1	1	1	313.77	1	2885	2511.6	813.27	2732.7	1908.2	527.51
O75367-2;O75367-3;O75367	Core histone macro-H2A.1	H2AFY	sp|O75367-2|H2AY_HUMAN Isoform 1 of Core histone macro-H2A.1 OS=Homo sapiens OX=9606 GN=MACROH2A1;sp|O75367-3|H2AY_HUMAN Isoform 3 of Core histone macro-H2A.1 OS=Homo sapiens OX=9606 GN=MACROH2A1;sp|O75367|H2AY_HUMAN Core histone macro-H2A.1 OS=Homo sapien	1	1	1	1	1	1	1	1	1	1	1	1	1	1	1	1	1	1	1	1	15321	7854.2	1	1	1	1	1	1	3956.2	2829.6
O75400-2;O75400;O75400-3	Pre-mRNA-processing factor 40 homolog A	PRPF40A	sp|O75400-2|PR40A_HUMAN Isoform 2 of Pre-mRNA-processing factor 40 homolog A OS=Homo sapiens OX=9606 GN=PRPF40A;sp|O75400|PR40A_HUMAN Pre-mRNA-processing factor 40 homolog A OS=Homo sapiens OX=9606 GN=PRPF40A PE=1 SV=2;sp|O75400-3|PR40A_HUMAN Isoform 3 of	21375	16145	20437	24450	21799	24150	19921	19109	13102	14266	14670	13872	14603	14006	21239	23004	19394	19352	26718	24232	21803	20956	18665	15874	17587	18085	29335	28682	27132	23910
O75475-3;O75475-2;O75475	PC4 and SFRS1-interacting protein	PSIP1	sp|O75475-3|PSIP1_HUMAN Isoform 3 of PC4 and SFRS1-interacting protein OS=Homo sapiens OX=9606 GN=PSIP1;sp|O75475-2|PSIP1_HUMAN Isoform 2 of PC4 and SFRS1-interacting protein OS=Homo sapiens OX=9606 GN=PSIP1;sp|O75475|PSIP1_HUMAN PC4 and SFRS1-interacting	6002.5	5064	5072.2	9502	8714.5	8963.1	6843	10046	4163.3	3906.5	3202.3	2447.2	3659.6	2967.1	12784	10694	4312.8	5779.9	7118.5	15817	11584	10955	5576.3	5804.4	7661.6	6905.6	17686	18240	10270	11830
O75494-5;O75494-4;O75494-6;O75494-3;O75494-2;O75494;Q8WXF0	Serine/arginine-rich splicing factor 10	SRSF10	sp|O75494-5|SRS10_HUMAN Isoform 5 of Serine/arginine-rich splicing factor 10 OS=Homo sapiens OX=9606 GN=SRSF10;sp|O75494-4|SRS10_HUMAN Isoform 4 of Serine/arginine-rich splicing factor 10 OS=Homo sapiens OX=9606 GN=SRSF10;sp|O75494-6|SRS10_HUMAN Isoform 6	1	490.59	1	1	1	1	2059.6	1	2529.1	1	3803.7	1	3529.2	3514.6	2327.7	1	3104.8	1	1	2594.3	22417	17604	5843.5	5427.7	6187.4	9406.7	2874.2	1484.6	8046.4	9977.7
O75533;O75533-2	Splicing factor 3B subunit 1	SF3B1	sp|O75533|SF3B1_HUMAN Splicing factor 3B subunit 1 OS=Homo sapiens OX=9606 GN=SF3B1 PE=1 SV=3	17282	12861	12118	16383	12092	11199	8362.2	7539.9	4143.9	3014	8411.1	8011.3	8487.5	8476.7	10870	8062.3	8113.6	7874.6	7386.6	11430	13817	13686	9788.8	10500	8684.6	8562.2	8375	8660.5	11163	11811
O75607	Nucleoplasmin-3	NPM3	sp|O75607|NPM3_HUMAN Nucleoplasmin-3 OS=Homo sapiens OX=9606 GN=NPM3 PE=1 SV=3	1	2244.5	1	1	1	1	1	1	1	1	1	1	1	2743.5	1774.8	1	1	1	1	1	4096	5459.2	2107.2	1809.3	1	1	1	1	1	1
O75643;O75643-2	U5 small nuclear ribonucleoprotein 200 kDa helicase	SNRNP200	sp|O75643|U520_HUMAN U5 small nuclear ribonucleoprotein 200 kDa helicase OS=Homo sapiens OX=9606 GN=SNRNP200 PE=1 SV=2	12962	10830	11635	12816	13794	13343	10329	9418.8	6363.5	6034.6	11419	11284	9868.6	9650.4	13362	14567	11488	9681.2	16032	14289	18068	17214	10777	10463	12900	12913	12654	12844	14556	14189
O75688;O75688-4;O75688-2;O75688-5;O75688-3;P35813-2;P35813;P35813-3	Protein phosphatase 1B	PPM1B	sp|O75688|PPM1B_HUMAN Protein phosphatase 1B OS=Homo sapiens OX=9606 GN=PPM1B PE=1 SV=1;sp|O75688-4|PPM1B_HUMAN Isoform 4 of Protein phosphatase 1B OS=Homo sapiens OX=9606 GN=PPM1B;sp|O75688-2|PPM1B_HUMAN Isoform Beta-2 of Protein phosphatase 1B OS=Homo sa	14091	12815	12240	14900	15287	18272	31328	29423	24483	25088	22870	24042	28205	28463	30376	32690	30766	27120	32660	26235	22295	22786	25652	25821	28987	28446	37783	38354	41193	42782
O75781-2;O75781	Paralemmin-1	PALM	sp|O75781-2|PALM_HUMAN Isoform 2 of Paralemmin-1 OS=Homo sapiens OX=9606 GN=PALM;sp|O75781|PALM_HUMAN Paralemmin-1 OS=Homo sapiens OX=9606 GN=PALM PE=1 SV=2	1	1	1	1	1	1	14333	13787	13148	13638	12240	12118	20921	22861	17175	21885	16320	17367	10613	8484.1	11215	10583	9225.1	9441.9	10088	11775	15191	12766	12337	13367
O75792	Ribonuclease H2 subunit A	RNASEH2A	sp|O75792|RNH2A_HUMAN Ribonuclease H2 subunit A OS=Homo sapiens OX=9606 GN=RNASEH2A PE=1 SV=2	1	1	1	14127	1	8583.4	17277	19464	17513	17568	19572	19464	19482	20907	24258	27029	23601	24809	28716	26074	23099	22013	23008	25119	26676	26516	30281	29563	31621	29891
O75821	Eukaryotic translation initiation factor 3 subunit G	EIF3G	sp|O75821|EIF3G_HUMAN Eukaryotic translation initiation factor 3 subunit G OS=Homo sapiens OX=9606 GN=EIF3G PE=1 SV=2	4601.4	7993.7	3111.3	7113.7	6176.8	4319.7	3777.7	1	1	1	1	2772.9	4568.3	4308.4	3452.8	1	4432.1	3837.6	1	4867.1	4512.2	5825.3	5735.3	4379.2	4099.1	3336.2	3538.6	1	4899.8	5903.2
O75937	DnaJ homolog subfamily C member 8	DNAJC8	sp|O75937|DNJC8_HUMAN DnaJ homolog subfamily C member 8 OS=Homo sapiens OX=9606 GN=DNAJC8 PE=1 SV=2	6001.6	8099.9	1	5525.5	1	5312.4	5020.8	5856.9	2872.2	2501	2282.2	1	1	2255	4817.3	6477.4	4454	1	9214	6277.4	5449.8	4924.4	3988.7	4402.6	4396.5	5343.4	5336.6	3924.7	4947.1	4124.4
O75940	Survival of motor neuron-related-splicing factor 30	SMNDC1	sp|O75940|SPF30_HUMAN Survival of motor neuron-related-splicing factor 30 OS=Homo sapiens OX=9606 GN=SMNDC1 PE=1 SV=1	13906	13585	16223	18305	14709	1	10744	13029	8436.6	8587.3	7554.2	8053.9	8577.8	7723	15703	20843	12626	10753	23540	16024	10937	12675	11330	13092	7505.8	7569.7	11690	12295	12718	12282
O75955;O75955-2	Flotillin-1	FLOT1	sp|O75955|FLOT1_HUMAN Flotillin-1 OS=Homo sapiens OX=9606 GN=FLOT1 PE=1 SV=3;sp|O75955-2|FLOT1_HUMAN Isoform 2 of Flotillin-1 OS=Homo sapiens OX=9606 GN=FLOT1	1	1	1	1	1	1	30743	31546	30495	27634	31847	32551	32383	34328	23832	28584	24915	26433	6371.6	6567.5	7623.5	6980.2	5125.1	4593	11397	10927	10910	13312	9293.8	10896
O76021;O76021-2	Ribosomal L1 domain-containing protein 1	RSL1D1	sp|O76021|RL1D1_HUMAN Ribosomal L1 domain-containing protein 1 OS=Homo sapiens OX=9606 GN=RSL1D1 PE=1 SV=3	1	1	1	1	1	1	1	1	1	1	1396.3	1	1916.6	1466.9	1	1	1	1879.3	1	1	35409	34242	2561.6	1255.5	6270.3	2677.4	1	1	9201.7	8892.3
O94813-3;O94813-2;O94813	Slit homolog 2 protein;Slit homolog 2 protein N-product;Slit homolog 2 protein C-product	SLIT2	sp|O94813-3|SLIT2_HUMAN Isoform 3 of Slit homolog 2 protein OS=Homo sapiens OX=9606 GN=SLIT2;sp|O94813-2|SLIT2_HUMAN Isoform 2 of Slit homolog 2 protein OS=Homo sapiens OX=9606 GN=SLIT2;sp|O94813|SLIT2_HUMAN Slit homolog 2 protein OS=Homo sapiens OX=9606 G	1	1	1	1	1	1	1	1	3135.2	1	4471.8	3002.3	1	1	1	1	1	1	1	1	1458.5	1	1	1	1	2214.7	1	1	1	1
O94905;O94905-2;O94905-3;O75477	Erlin-2	ERLIN2	sp|O94905|ERLN2_HUMAN Erlin-2 OS=Homo sapiens OX=9606 GN=ERLIN2 PE=1 SV=1	1	1	1	1	1	1	10705	12524	12494	12577	9105.4	8774.4	5027.2	3973.1	3399.3	3709.2	5766.5	4897.8	1	1	910.7	492.45	1	1	1	1	1	1	1	1
O94906-2;O94906	Pre-mRNA-processing factor 6	PRPF6	sp|O94906-2|PRP6_HUMAN Isoform 2 of Pre-mRNA-processing factor 6 OS=Homo sapiens OX=9606 GN=PRPF6;sp|O94906|PRP6_HUMAN Pre-mRNA-processing factor 6 OS=Homo sapiens OX=9606 GN=PRPF6 PE=1 SV=1	5860.6	5928.8	3190.9	4215.2	5105.3	7337.2	1646.2	2378.4	1	861.84	3533.3	2865.6	2853.6	2571.1	4864.4	5346.8	5631.6	5450.3	9900.6	5014.1	7635.2	8463.4	1666.9	1466.4	3203.7	4550.8	3155.4	2996.3	5726	5697.1
O95218-2;O95218	Zinc finger Ran-binding domain-containing protein 2	ZRANB2	sp|O95218-2|ZRAB2_HUMAN Isoform 2 of Zinc finger Ran-binding domain-containing protein 2 OS=Homo sapiens OX=9606 GN=ZRANB2;sp|O95218|ZRAB2_HUMAN Zinc finger Ran-binding domain-containing protein 2 OS=Homo sapiens OX=9606 GN=ZRANB2 PE=1 SV=2	646960	624220	505190	521750	516900	577590	456960	460210	382090	371630	372890	379480	482430	468390	484730	518580	463950	450670	811230	676270	488610	505640	614560	598900	591270	562660	629700	658500	532290	506650
O95232;O95232-2	Luc7-like protein 3	LUC7L3	sp|O95232|LC7L3_HUMAN Luc7-like protein 3 OS=Homo sapiens OX=9606 GN=LUC7L3 PE=1 SV=2	485190	475540	686010	692680	807390	732510	596030	610840	401460	399360	534670	555470	433880	429830	640160	624810	624320	578650	745240	715400	469650	483130	488750	488710	497750	477090	752930	765120	653240	626620
O95347-2;O95347	Structural maintenance of chromosomes protein 2	SMC2	sp|O95347-2|SMC2_HUMAN Isoform 2 of Structural maintenance of chromosomes protein 2 OS=Homo sapiens OX=9606 GN=SMC2;sp|O95347|SMC2_HUMAN Structural maintenance of chromosomes protein 2 OS=Homo sapiens OX=9606 GN=SMC2 PE=1 SV=2	1	1	1	1	1	1	1	1	1	1	1	1	1	1	1	1	1	1	1	1	1	1	1	1	1	1	1	1	1	1
O95373	Importin-7	IPO7	sp|O95373|IPO7_HUMAN Importin-7 OS=Homo sapiens OX=9606 GN=IPO7 PE=1 SV=1	1	1	1	1	1	1	1184700	1157100	2148700	2181400	1233600	1175500	594460	569980	256510	256340	439360	457910	4851.8	5620.9	4028.6	4489	5653.2	5366.7	27918	28254	64164	67171	9962	8975.6
O95391	Pre-mRNA-splicing factor SLU7	SLU7	sp|O95391|SLU7_HUMAN Pre-mRNA-splicing factor SLU7 OS=Homo sapiens OX=9606 GN=SLU7 PE=1 SV=2	79818	72788	102230	121730	120080	127550	91032	94486	61704	59319	37661	36219	50176	50383	73244	77488	56220	48135	97409	84259	65268	66725	58637	53369	53709	55669	81442	84459	81027	76387
O95399;O95399-2	Urotensin-2	UTS2	sp|O95399|UTS2_HUMAN Urotensin-2 OS=Homo sapiens OX=9606 GN=UTS2 PE=1 SV=1;sp|O95399-2|UTS2_HUMAN Isoform 2 of Urotensin-2 OS=Homo sapiens OX=9606 GN=UTS2	12974	12134	1	1	1	1	17128	15356	12684	12207	15931	16374	13775	14685	16491	17142	14010	13078	15129	12477	9774.4	12843	11963	11954	10898	12910	10857	12976	12259	11145
O95400	CD2 antigen cytoplasmic tail-binding protein 2	CD2BP2	sp|O95400|CD2B2_HUMAN CD2 antigen cytoplasmic tail-binding protein 2 OS=Homo sapiens OX=9606 GN=CD2BP2 PE=1 SV=1	7355.9	1	1	1	1	1	1	1	3514.8	1	8689.4	6549	6204.8	6182.2	7389.7	11340	2318	1	9291	8319.9	7891.9	6978.8	4812.4	5079.4	6151.1	6676.2	4981.2	5854.9	5298.7	6552.7
O95470	Sphingosine-1-phosphate lyase 1	SGPL1	sp|O95470|SGPL1_HUMAN Sphingosine-1-phosphate lyase 1 OS=Homo sapiens OX=9606 GN=SGPL1 PE=1 SV=3	1	1	1	1	1	1	1073.5	1562.9	3155.5	2533	7657.6	6153.5	2733	2139.3	1266.8	1433	1	1	1	1	1	1	1	1	1	1	1	1	1	1
P00338;P00338-3;P00338-5;P00338-4;P00338-2	L-lactate dehydrogenase A chain	LDHA	sp|P00338|LDHA_HUMAN L-lactate dehydrogenase A chain OS=Homo sapiens OX=9606 GN=LDHA PE=1 SV=2;sp|P00338-3|LDHA_HUMAN Isoform 3 of L-lactate dehydrogenase A chain OS=Homo sapiens OX=9606 GN=LDHA;sp|P00338-5|LDHA_HUMAN Isoform 5 of L-lactate dehydrogenase A	32371	40246	1	1	1	1	4953.4	5508.6	10363	12978	10336	9039.1	12279	13033	9963.7	7778.6	9764.1	6783.6	1	3116	6759.3	6681.2	14283	15342	21280	21850	1	1	1	1
P00492	Hypoxanthine-guanine phosphoribosyltransferase	HPRT1	sp|P00492|HPRT_HUMAN Hypoxanthine-guanine phosphoribosyltransferase OS=Homo sapiens OX=9606 GN=HPRT1 PE=1 SV=2	18602	11278	5073.9	6875.1	3845.1	4041.9	1	1755.3	6501.5	7396.2	9455.2	10496	9373.3	9205.8	6826.9	9651.8	8766.4	8211.7	6833.5	6992.5	6645.6	5866.6	9954.6	10502	11344	12453	4870.4	5768.7	7077.6	6837.5
P00558-2;P00558;P07205	Phosphoglycerate kinase 1	PGK1	sp|P00558-2|PGK1_HUMAN Isoform 2 of Phosphoglycerate kinase 1 OS=Homo sapiens OX=9606 GN=PGK1;sp|P00558|PGK1_HUMAN Phosphoglycerate kinase 1 OS=Homo sapiens OX=9606 GN=PGK1 PE=1 SV=3	26800	19742	1	1	1	1	10492	7863.5	22757	21187	12081	12509	18043	18670	18374	18346	15605	16652	3665.9	4093.1	8275.5	7156	13767	12910	16542	16452	2344	1	1	1
P01111	GTPase NRas	NRAS	sp|P01111|RASN_HUMAN GTPase NRas OS=Homo sapiens OX=9606 GN=NRAS PE=1 SV=1	1	1	1	1	1	1	84244	37053	126920	143520	88589	129980	44297	116540	24648	29793	41999	123770	8308	8527.6	6422.6	4732.9	12886	9684.7	1	1	1	1	1	1
P01116-2;P01116;P01112-2;P01112	GTPase KRas;GTPase KRas, N-terminally processed	KRAS	sp|P01116-2|RASK_HUMAN Isoform 2B of GTPase KRas OS=Homo sapiens OX=9606 GN=KRAS;sp|P01116|RASK_HUMAN GTPase KRas OS=Homo sapiens OX=9606 GN=KRAS PE=1 SV=1	796.33	1	1	1	1	1	32726000	33078000	32096000	34052000	27076000	26953000	22863000	21743000	20480000	19236000	31653000	31502000	6521800	6591900	4815600	5056500	6739600	6722000	523160	483460	645820	646690	498040	521470
P01859	Ig gamma-2 chain C region	IGHG2	sp|P01859|IGHG2_HUMAN Immunoglobulin heavy constant gamma 2 OS=Homo sapiens OX=9606 GN=IGHG2 PE=1 SV=2	84639	83021	118430	118090	123110	127460	107260	106460	69181	69028	69718	73062	57762	57888	68785	82726	93638	80640	92360	67244	55664	58481	60470	61330	67017	65843	83804	81164	94091	87544
P04049;P04049-2	RAF proto-oncogene serine/threonine-protein kinase	RAF1	sp|P04049|RAF1_HUMAN RAF proto-oncogene serine/threonine-protein kinase OS=Homo sapiens OX=9606 GN=RAF1 PE=1 SV=1;sp|P04049-2|RAF1_HUMAN Isoform 2 of RAF proto-oncogene serine/threonine-protein kinase OS=Homo sapiens OX=9606 GN=RAF1	1	1	1	1	1	1	14260	14265	19533	18824	12489	11443	11389	11240	9901.2	10905	7590.2	7451.4	351420	336960	266110	257540	288210	300540	3667.9	2514.4	1748.7	1059	1	1
P04075;P04075-2	Fructose-bisphosphate aldolase A	ALDOA	sp|P04075|ALDOA_HUMAN Fructose-bisphosphate aldolase A OS=Homo sapiens OX=9606 GN=ALDOA PE=1 SV=2;sp|P04075-2|ALDOA_HUMAN Isoform 2 of Fructose-bisphosphate aldolase A OS=Homo sapiens OX=9606 GN=ALDOA	105350	84965	25678	21938	1958.1	8598.3	19954	16040	21304	20774	29115	30674	28222	29720	17433	18521	22641	23365	17017	18544	26106	24549	44149	47194	58387	53894	15632	12640	15216	12306
P04181;P04181-2	Ornithine aminotransferase, mitochondrial;Ornithine aminotransferase, hepatic form;Ornithine aminotransferase, renal form	OAT	sp|P04181|OAT_HUMAN Ornithine aminotransferase, mitochondrial OS=Homo sapiens OX=9606 GN=OAT PE=1 SV=1;sp|P04181-2|OAT_HUMAN Isoform 2 of Ornithine aminotransferase, mitochondrial OS=Homo sapiens OX=9606 GN=OAT	200290	195910	209520	215970	180150	159730	136080	134090	115710	115890	128290	133620	154560	152830	151520	132570	146730	152810	120150	153040	134550	132990	167150	172120	125750	124850	141340	139220	151040	150770
P04264;CON__P04264	Keratin, type II cytoskeletal 1	KRT1	sp|P04264|K2C1_HUMAN Keratin, type II cytoskeletal 1 OS=Homo sapiens OX=9606 GN=KRT1 PE=1 SV=6;	1259400	1236300	111280	40609	4294300	4391900	9642.5	5481	4587.5	4345.2	19483	21063	17264	17489	14462	18840	87851	87538	2034.9	2943.2	13290	10930	25062	23792	54930	56941	43349	41622	154850	159300
P04350	Tubulin beta-4A chain	TUBB4A	sp|P04350|TBB4A_HUMAN Tubulin beta-4A chain OS=Homo sapiens OX=9606 GN=TUBB4A PE=1 SV=2	1	2986.6	1	1	1	1	10687	15338	27751	25661	26885	24822	28001	25769	22546	24540	20513	17281	9840.2	18285	17694	16692	16879	22006	16707	19412	12495	14695	11280	12870
P04406;P04406-2;O14556	Glyceraldehyde-3-phosphate dehydrogenase	GAPDH	sp|P04406|G3P_HUMAN Glyceraldehyde-3-phosphate dehydrogenase OS=Homo sapiens OX=9606 GN=GAPDH PE=1 SV=3;sp|P04406-2|G3P_HUMAN Isoform 2 of Glyceraldehyde-3-phosphate dehydrogenase OS=Homo sapiens OX=9606 GN=GAPDH	158340	156890	42762	31688	9667.2	12749	44313	41556	73154	74351	79111	75497	79477	84561	61254	71743	57086	56335	36662	38438	56145	57399	93428	96879	114220	117190	33429	24792	20749	22597
P04637-4;P04637;P04637-5;P04637-6;P04637-2;P04637-3;P04637-7;P04637-8;P04637-9	Cellular tumor antigen p53	TP53	sp|P04637-4|P53_HUMAN Isoform 4 of Cellular tumor antigen p53 OS=Homo sapiens OX=9606 GN=TP53;sp|P04637|P53_HUMAN Cellular tumor antigen p53 OS=Homo sapiens OX=9606 GN=TP53 PE=1 SV=4;sp|P04637-5|P53_HUMAN Isoform 5 of Cellular tumor antigen p53 OS=Homo sap	1	1	1	1	1	1	12236	20440	26179	21397	30028	30427	18427	17668	12610	6151.5	13522	17942	1	5480.6	15138	14523	6926.7	5939.7	11719	11535	7981.7	8129.7	13656	12734
P04792	Heat shock protein beta-1	HSPB1	sp|P04792|HSPB1_HUMAN Heat shock protein beta-1 OS=Homo sapiens OX=9606 GN=HSPB1 PE=1 SV=2	7360.7	9235.2	1	4335.2	5829.9	3624.8	6770.1	5172	5970	4619.8	6782.4	6676.3	6832.3	6766	10158	9144.6	6330.8	7828	6035.6	7313.1	9004.4	7948.2	9058	7094.9	6889.5	4525.2	1	4754.2	6602.3	7125.3
P04899;P04899-4;P04899-6;P04899-3;P04899-5;P04899-2;P09471-2;P09471;P11488;P19087;A8MTJ3;P38405-3	Guanine nucleotide-binding protein G(i) subunit alpha-2	GNAI2	sp|P04899|GNAI2_HUMAN Guanine nucleotide-binding protein G(i) subunit alpha-2 OS=Homo sapiens OX=9606 GN=GNAI2 PE=1 SV=3;sp|P04899-4|GNAI2_HUMAN Isoform sGi2 of Guanine nucleotide-binding protein G(i) subunit alpha-2 OS=Homo sapiens OX=9606 GN=GNAI2;sp|P04	1	1	1	1	1	1	62926	73399	88858	91698	77916	74400	98186	97845	58535	80951	76040	80084	49173	40139	51124	49696	51546	54717	91623	98784	69081	64798	57485	60066
P05023-3;P05023-4;P05023;P05023-2;P13637;P13637-2;P13637-3;P50993;Q13733;P20648;P54707;P54707-2	Sodium/potassium-transporting ATPase subunit alpha-1	ATP1A1	sp|P05023-3|AT1A1_HUMAN Isoform 3 of Sodium/potassium-transporting ATPase subunit alpha-1 OS=Homo sapiens OX=9606 GN=ATP1A1;sp|P05023-4|AT1A1_HUMAN Isoform 4 of Sodium/potassium-transporting ATPase subunit alpha-1 OS=Homo sapiens OX=9606 GN=ATP1A1;sp|P0502	2689.7	3934.3	1	1	1	1	54210	55622	70810	67889	43119	45232	47818	49841	32036	38003	36892	33807	25004	21289	21616	22539	24403	23090	23024	23920	19816	17485	12690	15736
P05089-2;P05089;P05089-3	Arginase-1	ARG1	sp|P05089-2|ARGI1_HUMAN Isoform 2 of Arginase-1 OS=Homo sapiens OX=9606 GN=ARG1;sp|P05089|ARGI1_HUMAN Arginase-1 OS=Homo sapiens OX=9606 GN=ARG1 PE=1 SV=2;sp|P05089-3|ARGI1_HUMAN Isoform 3 of Arginase-1 OS=Homo sapiens OX=9606 GN=ARG1	1	1	1	1	10214	8438.7	1	1	1	1	1	1	1	1	1	1	1	1	1	1	1	1	1	1	1	1	1	1	1	1
P05114	Non-histone chromosomal protein HMG-14	HMGN1	sp|P05114|HMGN1_HUMAN Non-histone chromosomal protein HMG-14 OS=Homo sapiens OX=9606 GN=HMGN1 PE=1 SV=3	1	1	1	1	1	1	1	1	1	1	1	1	1	2832.3	5193.7	5059.6	1	2476.3	1	4013.6	3114.6	1	1	1	2750.1	4012.3	2914.5	2735	3089.6	1
P05141;Q9H0C2	ADP/ATP translocase 2;ADP/ATP translocase 2, N-terminally processed	SLC25A5	sp|P05141|ADT2_HUMAN ADP/ATP translocase 2 OS=Homo sapiens OX=9606 GN=SLC25A5 PE=1 SV=7	183190	140310	124370	126920	118320	128060	310930	314360	322940	327050	274850	277550	228970	232840	227960	262320	290850	298310	293700	266570	228200	226070	228760	230250	179790	178540	212230	210330	195590	187330
P05198	Eukaryotic translation initiation factor 2 subunit 1	EIF2S1	sp|P05198|IF2A_HUMAN Eukaryotic translation initiation factor 2 subunit 1 OS=Homo sapiens OX=9606 GN=EIF2S1 PE=1 SV=3	3313.1	3439.3	1	1	1	1	1	1563.6	1668.9	1	1	2396.2	4224.3	3508.6	2580.1	3198.7	4434.9	1	1	2191.3	2463.1	2292	1	3751.6	3560.3	1	1	1332.2	1	1
P05204;Q15651-2;Q15651	Non-histone chromosomal protein HMG-17;High mobility group nucleosome-binding domain-containing protein 3	HMGN2;HMGN3	sp|P05204|HMGN2_HUMAN Non-histone chromosomal protein HMG-17 OS=Homo sapiens OX=9606 GN=HMGN2 PE=1 SV=3;sp|Q15651-2|HMGN3_HUMAN Isoform 2 of High mobility group nucleosome-binding domain-containing protein 3 OS=Homo sapiens OX=9606 GN=HMGN3;sp|Q15651|HMGN3	21661	17766	16895	21086	20111	21513	14429	16671	7659.2	9320.5	13565	13107	15689	14727	17209	16654	17532	12393	19107	21218	12395	12792	14627	15201	14905	14626	17909	17025	16094	13906
P05386	60S acidic ribosomal protein P1	RPLP1	sp|P05386|RLA1_HUMAN 60S acidic ribosomal protein P1 OS=Homo sapiens OX=9606 GN=RPLP1 PE=1 SV=1	41888	26906	1	1	1	1	32945	32763	63763	55697	88986	92902	61636	69219	60473	73967	55801	51220	25914	33361	43817	40392	43412	44142	58111	53958	25680	22787	1	23735
P05387	60S acidic ribosomal protein P2	RPLP2	sp|P05387|RLA2_HUMAN 60S acidic ribosomal protein P2 OS=Homo sapiens OX=9606 GN=RPLP2 PE=1 SV=1	40949	33332	10207	17439	4050	9775.9	55435	56447	52988	50574	75722	79146	52750	56965	62639	77636	61965	66649	27857	24275	29400	24367	27459	32679	41627	46877	32424	30916	25930	25663
P05388;P05388-2;Q8NHW5	60S acidic ribosomal protein P0;60S acidic ribosomal protein P0-like	RPLP0;RPLP0P6	sp|P05388|RLA0_HUMAN 60S acidic ribosomal protein P0 OS=Homo sapiens OX=9606 GN=RPLP0 PE=1 SV=1;sp|P05388-2|RLA0_HUMAN Isoform 2 of 60S acidic ribosomal protein P0 OS=Homo sapiens OX=9606 GN=RPLP0;sp|Q8NHW5|RLA0L_HUMAN 60S acidic ribosomal protein P0-like	37102	33679	27337	27056	15613	20565	39664	39873	44975	43628	53589	54381	46371	48846	53363	55717	55307	59742	40331	40691	49959	46176	46765	48516	50136	49563	37036	35215	44049	43228
P05455	Lupus La protein	SSB	sp|P05455|LA_HUMAN Lupus La protein OS=Homo sapiens OX=9606 GN=SSB PE=1 SV=2	5345.6	15125	1	1	1	1	1	1	1860.8	627.72	5668.2	4347.2	2804.8	4447.8	1869.1	1	1	1	1	1972.5	4105.7	3295.8	9612.8	10155	11962	13725	1	1	1	1
P06241;P06241-3;P06241-2;P06239;P06239-3	Tyrosine-protein kinase Fyn	FYN	sp|P06241|FYN_HUMAN Tyrosine-protein kinase Fyn OS=Homo sapiens OX=9606 GN=FYN PE=1 SV=3;sp|P06241-3|FYN_HUMAN Isoform 3 of Tyrosine-protein kinase Fyn OS=Homo sapiens OX=9606 GN=FYN;sp|P06241-2|FYN_HUMAN Isoform 2 of Tyrosine-protein kinase Fyn OS=Homo sa	1	1	1	1	1	1	3296.9	4150.9	5754.4	8920.1	5538	4729.4	9999.1	10284	3755.6	3031.3	2411.6	2887.1	1	1	2437	2589.2	3896.2	1577.5	3072	4403.1	5757.4	4800.7	5602.4	4234.5
P06454-2;P06454	Prothymosin alpha;Prothymosin alpha, N-terminally processed;Thymosin alpha-1	PTMA	sp|P06454-2|PTMA_HUMAN Isoform 2 of Prothymosin alpha OS=Homo sapiens OX=9606 GN=PTMA;sp|P06454|PTMA_HUMAN Prothymosin alpha OS=Homo sapiens OX=9606 GN=PTMA PE=1 SV=2	66258	63656	27867	16091	1	1	9367.8	8682.9	8690.1	9086.2	14659	14127	13885	13695	9542.4	9899.9	11627	1	7716.6	5281.4	8354	7466.8	24596	26844	39369	38358	10818	1	2010.1	1845.2
P06493;P06493-2;P24941-2;P24941;Q00526;P11802-2;O94921;Q14004-2;Q00536-2;Q00537;Q00537-2;Q07002-3;Q00536-3;Q00536;Q07002;Q96Q40-5;O94921-2;Q96Q40;O94921-3;Q96Q40-3;Q96Q40-4;Q96Q40-6;Q00534;P11802;Q14004	Cyclin-dependent kinase 1	CDK1	sp|P06493|CDK1_HUMAN Cyclin-dependent kinase 1 OS=Homo sapiens OX=9606 GN=CDK1 PE=1 SV=3;sp|P06493-2|CDK1_HUMAN Isoform 2 of Cyclin-dependent kinase 1 OS=Homo sapiens OX=9606 GN=CDK1	33197	29414	25490	31989	26419	30144	35504	36434	32683	32112	34751	33452	31808	31958	35780	39812	37037	36231	45426	37181	31966	33711	35561	34773	30177	31063	32205	31895	34657	35501
P06576	ATP synthase subunit beta, mitochondrial	ATP5B	sp|P06576|ATPB_HUMAN ATP synthase subunit beta, mitochondrial OS=Homo sapiens OX=9606 GN=ATP5F1B PE=1 SV=3	43236	33368	1933.8	3164.5	1	343.17	35474	36095	52942	51306	45528	44754	54150	54203	44369	49149	52040	56449	30958	30143	34839	34003	41312	40094	43749	48310	29461	25961	20624	21397
P06733;P06733-2;P13929-3;P13929-2;P13929	Alpha-enolase	ENO1	sp|P06733|ENOA_HUMAN Alpha-enolase OS=Homo sapiens OX=9606 GN=ENO1 PE=1 SV=2;sp|P06733-2|ENOA_HUMAN Isoform MBP-1 of Alpha-enolase OS=Homo sapiens OX=9606 GN=ENO1	158410	138300	16618	14013	1	1	12865	14124	23323	19586	39748	40784	38336	40626	17785	23253	18337	20463	15577	17049	27571	25496	65476	71042	113240	112560	12027	9599.5	3802.6	6717.1
P06748;P06748-2;P06748-3	Nucleophosmin	NPM1	sp|P06748|NPM_HUMAN Nucleophosmin OS=Homo sapiens OX=9606 GN=NPM1 PE=1 SV=2;sp|P06748-2|NPM_HUMAN Isoform 2 of Nucleophosmin OS=Homo sapiens OX=9606 GN=NPM1;sp|P06748-3|NPM_HUMAN Isoform 3 of Nucleophosmin OS=Homo sapiens OX=9606 GN=NPM1	47050	43930	12442	20689	9381	7842.4	32859	29346	23666	24674	35440	32601	42056	40264	42100	49437	33241	26859	52248	34281	150990	146330	50131	49524	72126	63882	25530	24774	67057	73309
P06753-2;P06753-5;P06753-3;P06753-4;P06753-6;P06753;P06753-7;P09493-4;P07951-2;P09493-10;P09493-9;P09493-8;P09493-7;P09493-6;CON__Q3SX28;P09493-3;P09493;P07951;P09493-2;P67936;P07951-3;P09493-5;P67936-2	Tropomyosin alpha-3 chain	TPM3	sp|P06753-2|TPM3_HUMAN Isoform 2 of Tropomyosin alpha-3 chain OS=Homo sapiens OX=9606 GN=TPM3;sp|P06753-5|TPM3_HUMAN Isoform 5 of Tropomyosin alpha-3 chain OS=Homo sapiens OX=9606 GN=TPM3;sp|P06753-3|TPM3_HUMAN Isoform 3 of Tropomyosin alpha-3 chain OS=Hom	16846	16101	5843.2	5523.7	4974.4	5480.2	4793.3	4544.6	5415.9	4109.3	8858.6	8620.1	10649	10184	11689	11382	7754.2	7553.1	12965	9503.4	12013	11063	12287	12752	11465	11747	4159.2	4589.8	7696	6087.4
P07195;Q6ZMR3;P07864	L-lactate dehydrogenase B chain	LDHB	sp|P07195|LDHB_HUMAN L-lactate dehydrogenase B chain OS=Homo sapiens OX=9606 GN=LDHB PE=1 SV=2	65411	67143	1	3213.9	1	1	5085.7	7557.9	12508	11490	18501	13918	19809	20340	9691	8990.8	9712.1	6571.8	6772.9	4943	10311	10712	30074	33123	45731	45614	4607.2	1928.8	1242.9	177.59
P07196	Neurofilament light polypeptide	NEFL	sp|P07196|NFL_HUMAN Neurofilament light polypeptide OS=Homo sapiens OX=9606 GN=NEFL PE=1 SV=3	241060	238810	107010	206370	62403	75861	153250	160180	232690	197350	235580	226940	237530	238060	241720	170920	141340	219300	50040	194640	306100	288540	206630	197040	175560	205140	237900	278040	158110	118610
P07197;P07197-2	Neurofilament medium polypeptide	NEFM	sp|P07197|NFM_HUMAN Neurofilament medium polypeptide OS=Homo sapiens OX=9606 GN=NEFM PE=1 SV=3	1	1	1	1	1	1	1	362.84	128.25	1	1	1	758.91	703.39	1691.6	2128.2	562.46	754.15	1	1348.2	48829	43030	521.68	360.78	8359.8	9821.1	693.84	1	14414	15036
P07237	Protein disulfide-isomerase	P4HB	sp|P07237|PDIA1_HUMAN Protein disulfide-isomerase OS=Homo sapiens OX=9606 GN=P4HB PE=1 SV=3	3932.3	4369.2	1	1	1	1	1	1	2205.6	1	2040.8	2836.3	3949.1	2494.4	3332.8	3447.3	1	1	1928.7	1	1	2758.9	2488.7	1	3735.2	2374.6	1	1	1	1
P07305-2;P07305	Histone H1.0;Histone H1.0, N-terminally processed	H1F0	sp|P07305-2|H10_HUMAN Isoform 2 of Histone H1.0 OS=Homo sapiens OX=9606 GN=H1-0;sp|P07305|H10_HUMAN Histone H1.0 OS=Homo sapiens OX=9606 GN=H1-0 PE=1 SV=3	1	1	1	1	1	1	1	1	1	1	1	1	1	1	1	1	1	1	1	1	5834.8	3936.3	1	1	1	1	1	1	1	1
P07355;A6NMY6;P07355-2	Annexin A2;Putative annexin A2-like protein	ANXA2;ANXA2P2	sp|P07355|ANXA2_HUMAN Annexin A2 OS=Homo sapiens OX=9606 GN=ANXA2 PE=1 SV=2;sp|A6NMY6|AXA2L_HUMAN Putative annexin A2-like protein OS=Homo sapiens OX=9606 GN=ANXA2P2 PE=5 SV=2;sp|P07355-2|ANXA2_HUMAN Isoform 2 of Annexin A2 OS=Homo sapiens OX=9606 GN=ANXA2	10358	9489.3	1	3580.5	7994.7	10968	5552.4	5290.4	6529.7	6243.8	6809.4	5885	11132	11144	7490.2	4953.8	6462.7	6675.2	4675	5989.6	6241.6	5909.6	8071.4	7719.8	10230	9735.7	3381.7	4134.8	4606.7	5732.6
P07437	Tubulin beta chain	TUBB	sp|P07437|TBB5_HUMAN Tubulin beta chain OS=Homo sapiens OX=9606 GN=TUBB PE=1 SV=2	474870	576370	703710	630870	577100	538570	1610100	1546700	1850800	1885500	1508000	1589600	1450000	1515800	1594500	1710600	1689300	1932700	1410700	1363000	1271700	1225800	1301500	1301300	1061800	1142600	1202600	1211500	1095700	1018900
P07737;CON__P02584	Profilin-1	PFN1	sp|P07737|PROF1_HUMAN Profilin-1 OS=Homo sapiens OX=9606 GN=PFN1 PE=1 SV=2	38287	38096	10641	11385	1	3089.8	9688.7	8847.1	12320	11745	15983	20071	14848	15714	10620	12067	11819	10960	12315	9162.5	14710	12984	29474	29542	33161	32516	8274.7	6279.2	6876.5	2305.8
P07814	Bifunctional glutamate/proline--tRNA ligase;Glutamate--tRNA ligase;Proline--tRNA ligase	EPRS	sp|P07814|SYEP_HUMAN Bifunctional glutamate/proline--tRNA ligase OS=Homo sapiens OX=9606 GN=EPRS1 PE=1 SV=5	1517.7	2634.7	1	1	1	1	3596.5	5310.1	4981.8	4048.8	8182	6029.6	9014.9	9444.2	8026.5	6175.7	4632	1675.8	1963.5	2715	2879.2	3829.2	5426.3	4294.1	4467.9	3648.4	496.08	781.45	1855.8	3268.3
P07900;P07900-2;Q14568;Q58FG0	Heat shock protein HSP 90-alpha	HSP90AA1	sp|P07900|HS90A_HUMAN Heat shock protein HSP 90-alpha OS=Homo sapiens OX=9606 GN=HSP90AA1 PE=1 SV=5;sp|P07900-2|HS90A_HUMAN Isoform 2 of Heat shock protein HSP 90-alpha OS=Homo sapiens OX=9606 GN=HSP90AA1	38706	37125	4915.2	10054	1	1	18156	19931	23697	24825	27561	29094	30102	30417	18898	20250	21349	19487	22797	18488	24076	24589	33898	33458	37550	36935	13157	10654	12306	13809
P07910-2;P07910-4;P07910;P07910-3;P0DMR1;O60812;B7ZW38;B2RXH8	Heterogeneous nuclear ribonucleoproteins C1/C2;Heterogeneous nuclear ribonucleoprotein C-like 4;Heterogeneous nuclear ribonucleoprotein C-like 1;Heterogeneous nuclear ribonucleoprotein C-like 3;Heterogeneous nuclear ribonucleoprotein C-like 2	HNRNPC;HNRNPCL4;HNRNPCL1;HNRNPCL3;HNRNPCL2	sp|P07910-2|HNRPC_HUMAN Isoform C1 of Heterogeneous nuclear ribonucleoproteins C1/C2 OS=Homo sapiens OX=9606 GN=HNRNPC;sp|P07910-4|HNRPC_HUMAN Isoform 4 of Heterogeneous nuclear ribonucleoproteins C1/C2 OS=Homo sapiens OX=9606 GN=HNRNPC;sp|P07910|HNRPC_HUM	22145	19525	20713	27178	32892	31725	50399	45619	22112	20854	36162	35193	42726	46300	49879	51852	68494	81304	33927	36030	204390	190870	47194	33653	73352	72831	38917	34864	105900	105560
P07919	Cytochrome b-c1 complex subunit 6, mitochondrial	UQCRH	sp|P07919|QCR6_HUMAN Cytochrome b-c1 complex subunit 6, mitochondrial OS=Homo sapiens OX=9606 GN=UQCRH PE=1 SV=2	7699.6	8280	1	1	1	1	4280.7	1	18482	15447	10119	8073.9	6372.5	10621	2842.6	1	4025.5	5013.4	1	6186.3	7512.8	9081.6	10691	9745.1	6013.3	6188.3	3883.6	2271.6	3180.1	1
P07947;P12931;P12931-2	Tyrosine-protein kinase Yes	YES1	sp|P07947|YES_HUMAN Tyrosine-protein kinase Yes OS=Homo sapiens OX=9606 GN=YES1 PE=1 SV=3	1	1	1	1	1	1	23012	22259	25160	25419	21687	22214	28608	28906	20236	21924	21818	21523	12611	11668	13517	12999	13940	15285	20632	21576	18262	16494	14789	15525
P07948-2;P07948;P08631-3;P08631-2;P08631-4;P08631	Tyrosine-protein kinase Lyn	LYN	sp|P07948-2|LYN_HUMAN Isoform 2 of Tyrosine-protein kinase Lyn OS=Homo sapiens OX=9606 GN=LYN;sp|P07948|LYN_HUMAN Tyrosine-protein kinase Lyn OS=Homo sapiens OX=9606 GN=LYN PE=1 SV=3	1	1	1	1	1	1	13680	20495	22346	22851	19242	17572	23771	26449	14960	18316	16587	15781	11349	10846	13195	11689	17014	11638	15069	16829	11069	12601	10281	12754
P08238;Q58FF7;Q58FG1	Heat shock protein HSP 90-beta	HSP90AB1	sp|P08238|HS90B_HUMAN Heat shock protein HSP 90-beta OS=Homo sapiens OX=9606 GN=HSP90AB1 PE=1 SV=4	183670	180790	76593	71513	39882	38666	108940	104490	115180	114420	128950	133290	132180	129530	94689	109860	100020	103050	114850	98781	113130	115690	153780	155120	159900	158630	76069	71863	69627	66321
P08621-2;P08621;P08621-3;P08621-4	U1 small nuclear ribonucleoprotein 70 kDa	SNRNP70	sp|P08621-2|RU17_HUMAN Isoform 2 of U1 small nuclear ribonucleoprotein 70 kDa OS=Homo sapiens OX=9606 GN=SNRNP70;sp|P08621|RU17_HUMAN U1 small nuclear ribonucleoprotein 70 kDa OS=Homo sapiens OX=9606 GN=SNRNP70 PE=1 SV=2;sp|P08621-3|RU17_HUMAN Isoform 3 of	3332.4	3093.2	1	6210.6	1	5800.2	29128	33095	30499	26150	25232	21870	28270	26915	19413	18582	18624	15514	10229	7719.5	9531.3	9709.9	4086.8	6468	8353.4	6820.7	10328	10663	9029	7333.5
P08670;P41219;P41219-2;P14136-2;P14136;Q16352;P14136-3;CON__P78386;CON__P78385;CON__Q61726;CON__O43790;CON__Q6NT21;Q14533;P78385;CON__Q14533;O43790;P78386	Vimentin	VIM	sp|P08670|VIME_HUMAN Vimentin OS=Homo sapiens OX=9606 GN=VIM PE=1 SV=4	29993	27758	31221	48589	109410	115780	248150	244380	133290	132840	138100	138830	207680	205410	277500	281880	327390	317310	170680	159010	880570	851130	164190	125630	456620	445920	201880	182620	649310	655020
P08708	40S ribosomal protein S17	RPS17	sp|P08708|RS17_HUMAN 40S ribosomal protein S17 OS=Homo sapiens OX=9606 GN=RPS17 PE=1 SV=2	79287	76042	78635	71843	75382	62521	74305	86879	70453	80752	96048	95499	70370	66740	105310	107230	74081	75164	88840	102220	94261	91719	79283	79058	82860	79903	107510	93210	84265	88493
P08754	Guanine nucleotide-binding protein G(k) subunit alpha	GNAI3	sp|P08754|GNAI3_HUMAN Guanine nucleotide-binding protein G(i) subunit alpha OS=Homo sapiens OX=9606 GN=GNAI3 PE=1 SV=3	1	1	1	1	1	1	178440	180610	248300	246490	196380	204960	235580	235840	158920	131490	224120	223150	131760	119450	130450	133330	159340	165520	253920	253020	195190	179390	147340	146320
P08865	40S ribosomal protein SA	RPSA	sp|P08865|RSSA_HUMAN 40S ribosomal protein SA OS=Homo sapiens OX=9606 GN=RPSA PE=1 SV=4	93604	85364	74812	79849	60614	60410	64635	63557	72744	72321	93684	95152	84927	89221	80883	95973	83525	93134	80705	75676	89747	85871	91243	90094	84317	86051	67258	69518	84525	83865
P09104-2;P09104	Gamma-enolase	ENO2	sp|P09104-2|ENOG_HUMAN Isoform 2 of Gamma-enolase OS=Homo sapiens OX=9606 GN=ENO2;sp|P09104|ENOG_HUMAN Gamma-enolase OS=Homo sapiens OX=9606 GN=ENO2 PE=1 SV=3	94989	1	10764	1	1	1	1	1	1	12679	1	1	25147	1	15370	1	1	1	11221	11008	1	17773	1	46080	1	1	1	1	4780.6	3655.8
P09211	Glutathione S-transferase P	GSTP1	sp|P09211|GSTP1_HUMAN Glutathione S-transferase P OS=Homo sapiens OX=9606 GN=GSTP1 PE=1 SV=2	42506	55723	1	1	1	1	1	1	1	1435.7	2979.2	3378.4	3305.7	3634.6	1	1878.2	1	1229.2	1	1	3314.1	1	8455.9	8002.5	13770	14510	1	1	1	447.12
P09382	Galectin-1	LGALS1	sp|P09382|LEG1_HUMAN Galectin-1 OS=Homo sapiens OX=9606 GN=LGALS1 PE=1 SV=2	7262.9	5247.8	1	1	1	1	1	1	1	1	1	923.61	3497.1	3219.9	1211.2	5245.6	2742	1	1	2708.3	3390.9	2460.9	3320.6	4236.6	1	1	1	1	4640.5	3986.7
P09429;B2RPK0;P23497	High mobility group protein B1	HMGB1	sp|P09429|HMGB1_HUMAN High mobility group protein B1 OS=Homo sapiens OX=9606 GN=HMGB1 PE=1 SV=3	73949	76164	52452	58529	56346	44981	48106	51354	31376	28814	25529	25239	30541	32584	45834	31905	34088	35746	44053	54751	49056	51576	50991	48574	47603	47839	47900	52537	30670	35423
P09496-2;P09496-4;P09496-3;P09496;P09496-5	Clathrin light chain A	CLTA	sp|P09496-2|CLCA_HUMAN Isoform Non-brain of Clathrin light chain A OS=Homo sapiens OX=9606 GN=CLTA;sp|P09496-4|CLCA_HUMAN Isoform 4 of Clathrin light chain A OS=Homo sapiens OX=9606 GN=CLTA;sp|P09496-3|CLCA_HUMAN Isoform 3 of Clathrin light chain A OS=Homo	1	1	1	1	1	1	15206	14353	13433	12595	15714	14221	11987	11585	9979.2	12354	1	5688.8	1	3797.7	5073.6	6593.9	3459.7	4197.3	4246	1	1	1	1	3382.2
P09651-3;P09651-2;P09651;Q32P51	Heterogeneous nuclear ribonucleoprotein A1;Heterogeneous nuclear ribonucleoprotein A1, N-terminally processed;Heterogeneous nuclear ribonucleoprotein A1-like 2	HNRNPA1;HNRNPA1L2	sp|P09651-3|ROA1_HUMAN Isoform 2 of Heterogeneous nuclear ribonucleoprotein A1 OS=Homo sapiens OX=9606 GN=HNRNPA1;sp|P09651-2|ROA1_HUMAN Isoform A1-A of Heterogeneous nuclear ribonucleoprotein A1 OS=Homo sapiens OX=9606 GN=HNRNPA1;sp|P09651|ROA1_HUMAN Hete	19125	21127	5613.5	4834.9	12784	14777	7359.9	10711	9428	6248.4	13682	10349	14025	15366	14574	6849.4	9670.1	10054	1	3633.4	46780	45275	15891	14238	24672	28528	9749.3	6632.7	19477	16974
P09661	U2 small nuclear ribonucleoprotein A	SNRPA1	sp|P09661|RU2A_HUMAN U2 small nuclear ribonucleoprotein A OS=Homo sapiens OX=9606 GN=SNRPA1 PE=1 SV=2	11607	9607	5938.4	11667	10533	13756	6126.7	5984	4128.4	3954.6	6446.8	8114.5	6780.7	7937.4	9733.9	11307	7152.9	7739.3	19477	12331	11300	14366	12639	10441	8125.8	1	6935.3	6150.3	10343	10813
P09669	Cytochrome c oxidase subunit 6C	COX6C	sp|P09669|COX6C_HUMAN Cytochrome c oxidase subunit 6C OS=Homo sapiens OX=9606 GN=COX6C PE=1 SV=2	4442.1	3869.1	1	1878.9	1	1	4428.1	4807.2	8256.5	7979.1	7175.2	7042.3	4044.3	4148.6	5415.7	1	3488.9	4000.5	1	5400.2	6899	7493.2	5072.7	5303.2	2672.3	2437.6	3485.9	6046.1	3881.6	3576.4
P09874	Poly [ADP-ribose] polymerase 1	PARP1	sp|P09874|PARP1_HUMAN Poly [ADP-ribose] polymerase 1 OS=Homo sapiens OX=9606 GN=PARP1 PE=1 SV=4	53275	51136	37745	41580	36660	36280	41018	39628	31326	29727	37445	35826	32608	31294	41474	31583	35614	34508	32787	42625	42141	41789	40455	41304	45653	44914	36185	38436	31597	31246
P09972	Fructose-bisphosphate aldolase C	ALDOC	sp|P09972|ALDOC_HUMAN Fructose-bisphosphate aldolase C OS=Homo sapiens OX=9606 GN=ALDOC PE=1 SV=2	52414	54446	1	1	1	1	1	1	525.4	1	1	1	1	1	1	1	1	1	1	1	1	1	1	1	1	1	1	1	1	1
P0C0L4-2;P0C0L4;P0C0L5	Complement C4-A;Complement C4 beta chain;Complement C4-A alpha chain;C4a anaphylatoxin;C4b-A;C4d-A;Complement C4 gamma chain;Complement C4-B;Complement C4 beta chain;Complement C4-B alpha chain;C4a anaphylatoxin;C4b-B;C4d-B;Complement C4 gamma chain	C4A;C4B	sp|P0C0L4-2|CO4A_HUMAN Isoform 2 of Complement C4-A OS=Homo sapiens OX=9606 GN=C4A;sp|P0C0L4|CO4A_HUMAN Complement C4-A OS=Homo sapiens OX=9606 GN=C4A PE=1 SV=2;sp|P0C0L5|CO4B_HUMAN Complement C4-B OS=Homo sapiens OX=9606 GN=C4B PE=1 SV=2	29593	35908	38881	43966	39002	34894	33450	33654	35904	32575	43292	38648	35519	33663	34685	27959	46103	43608	33650	38392	30315	32227	39713	38602	42333	38691	44046	42008	43571	48397
P0DMV8;P0DMV9;P0DMV8-2	Heat shock 70 kDa protein 1A;Heat shock 70 kDa protein 1B	HSPA1A;HSPA1B	sp|P0DMV8|HS71A_HUMAN Heat shock 70 kDa protein 1A OS=Homo sapiens OX=9606 GN=HSPA1A PE=1 SV=1;sp|P0DMV9|HS71B_HUMAN Heat shock 70 kDa protein 1B OS=Homo sapiens OX=9606 GN=HSPA1B PE=1 SV=1;sp|P0DMV8-2|HS71A_HUMAN Isoform 2 of Heat shock 70 kDa protein 1A	342470	327230	303320	299490	259920	261860	388550	375870	346390	349750	372400	378750	422320	413320	389600	375390	389320	389820	333740	348030	298170	305350	307120	316320	360970	357310	342630	345550	343480	335150
P0DN76;Q01081;Q01081-2;Q8WU68-3;Q8WU68;Q01081-3;Q01081-4;Q8WU68-2	Splicing factor U2AF 35 kDa subunit;Splicing factor U2AF 26 kDa subunit	U2AF1;U2AF1L4	sp|P0DN76|U2AF5_HUMAN Splicing factor U2AF 35 kDa subunit-like protein OS=Homo sapiens OX=9606 GN=U2AF1L5 PE=1 SV=1;sp|Q01081|U2AF1_HUMAN Splicing factor U2AF 35 kDa subunit OS=Homo sapiens OX=9606 GN=U2AF1 PE=1 SV=3;sp|Q01081-2|U2AF1_HUMAN Isoform 2 of Sp	205840	228220	185920	195320	207120	212080	167690	156150	156350	143550	128400	128770	112230	113040	166290	192350	177310	175950	236460	214580	156950	160020	156430	159430	159060	165690	229650	227260	160730	168300
P0DP25;P0DP24;P0DP23;P27482;P02585			sp|P0DP25|CALM3_HUMAN Calmodulin-3 OS=Homo sapiens OX=9606 GN=CALM3 PE=1 SV=1;sp|P0DP24|CALM2_HUMAN Calmodulin-2 OS=Homo sapiens OX=9606 GN=CALM2 PE=1 SV=1;sp|P0DP23|CALM1_HUMAN Calmodulin-1 OS=Homo sapiens OX=9606 GN=CALM1 PE=1 SV=1	45766	44608	40797	41686	29502	31795	130600	130990	110020	106430	100220	100830	140420	140760	120060	126810	103290	104290	75721	77800	92444	88548	87794	88306	119870	125390	107430	111570	114150	108980
P0DPB5;P0DPB6		POLR1D	sp|P0DPB5|RPC22_HUMAN Protein POLR1D, isoform 2 OS=Homo sapiens OX=9606 GN=POLR1D PE=1 SV=1;sp|P0DPB6|RPAC2_HUMAN DNA-directed RNA polymerases I and III subunit RPAC2 OS=Homo sapiens OX=9606 GN=POLR1D PE=1 SV=1	6442	5760	6198.6	9019.7	12015	11923	9853.5	10372	6651.3	5009.2	7249.3	7311.4	2740.2	4045.5	7127.7	6962.3	4460.1	3140.5	12297	10025	6772.7	7675.1	4356.8	4672.5	5350.5	3185.7	8677.5	8456.6	6235.1	6497.1
P10321-2;P01893;P10321;P13747;P01889;P04439;P04439-2	HLA class I histocompatibility antigen, Cw-7 alpha chain;Putative HLA class I histocompatibility antigen, alpha chain H;HLA class I histocompatibility antigen, alpha chain E;HLA class I histocompatibility antigen, B-7 alpha chain;HLA class I histocompatibility antigen, A-3 alpha chain	HLA-C;HLA-H;HLA-E;HLA-B;HLA-A	sp|P10321-2|HLAC_HUMAN Isoform 2 of HLA class I histocompatibility antigen, C alpha chain OS=Homo sapiens OX=9606 GN=HLA-C;sp|P01893|HLAH_HUMAN Putative HLA class I histocompatibility antigen, alpha chain H OS=Homo sapiens OX=9606 GN=HLA-H PE=5 SV=3;sp|P10	1	1	1	1	1	1	4493.8	3900.2	11516	10084	7748.9	5068.5	8345.3	10327	8805.3	11030	8134.1	13083	4236.8	6742.3	5628.5	3987	5459.2	4893.3	3903.3	3106	3270.4	3132.7	3567.1	2741
P10412;P16402;Q02539;P22492;P16401	Histone H1.4;Histone H1.3	HIST1H1E;HIST1H1D	sp|P10412|H14_HUMAN Histone H1.4 OS=Homo sapiens OX=9606 GN=H1-4 PE=1 SV=2;sp|P16402|H13_HUMAN Histone H1.3 OS=Homo sapiens OX=9606 GN=H1-3 PE=1 SV=2	2618	1	1	6436.3	13013	11198	22430	24596	3333.9	1	10312	14148	14176	15189	28898	27662	29145	22236	17636	11374	88843	109500	13872	9594.5	22726	23115	9640.6	12021	48923	46588
P10599;P10599-2	Thioredoxin	TXN	sp|P10599|THIO_HUMAN Thioredoxin OS=Homo sapiens OX=9606 GN=TXN PE=1 SV=3;sp|P10599-2|THIO_HUMAN Isoform 2 of Thioredoxin OS=Homo sapiens OX=9606 GN=TXN	27063	28642	23588	25147	21600	11165	13770	10592	17793	15521	15623	18242	17166	16793	17044	11940	17721	19320	16538	18293	17003	16050	24568	22406	22357	23050	20085	21013	21769	22792
P10644;P10644-2;P31321	cAMP-dependent protein kinase type I-alpha regulatory subunit;cAMP-dependent protein kinase type I-alpha regulatory subunit, N-terminally processed	PRKAR1A	sp|P10644|KAP0_HUMAN cAMP-dependent protein kinase type I-alpha regulatory subunit OS=Homo sapiens OX=9606 GN=PRKAR1A PE=1 SV=1;sp|P10644-2|KAP0_HUMAN Isoform 2 of cAMP-dependent protein kinase type I-alpha regulatory subunit OS=Homo sapiens OX=9606 GN=PRK	21038	18432	10551	17197	4362.5	10627	28014	27879	28139	27536	31363	31163	38687	39481	37249	36061	31412	32341	37025	35149	35626	29952	33051	30346	25778	24228	25732	25292	26922	26211
P10809;P10809-2	60 kDa heat shock protein, mitochondrial	HSPD1	sp|P10809|CH60_HUMAN 60 kDa heat shock protein, mitochondrial OS=Homo sapiens OX=9606 GN=HSPD1 PE=1 SV=2	64804	59250	17265	15913	1850.3	2151.6	15037	18029	20016	19480	30112	29364	30152	32360	25732	27198	24101	25694	21683	20422	26274	25539	42128	44276	50835	51449	21201	14732	15780	17213
P11021	78 kDa glucose-regulated protein	HSPA5	sp|P11021|BIP_HUMAN Endoplasmic reticulum chaperone BiP OS=Homo sapiens OX=9606 GN=HSPA5 PE=1 SV=2	63499	56410	50530	57266	51058	47901	86277	86601	76063	72830	82187	81769	79747	77313	82705	86141	71826	70962	59714	61459	57438	59945	54507	54291	63404	63359	63793	65996	63893	62001
P11142;P11142-2;P54652	Heat shock cognate 71 kDa protein	HSPA8	sp|P11142|HSP7C_HUMAN Heat shock cognate 71 kDa protein OS=Homo sapiens OX=9606 GN=HSPA8 PE=1 SV=1;sp|P11142-2|HSP7C_HUMAN Isoform 2 of Heat shock cognate 71 kDa protein OS=Homo sapiens OX=9606 GN=HSPA8	429870	406200	403620	409960	358700	356750	533900	537950	460960	469230	474200	486860	502210	500660	502110	482870	478320	499890	448790	447080	397980	400990	409720	414480	432720	423750	438340	440470	440840	423500
P11166	Solute carrier family 2, facilitated glucose transporter member 1	SLC2A1	sp|P11166|GTR1_HUMAN Solute carrier family 2, facilitated glucose transporter member 1 OS=Homo sapiens OX=9606 GN=SLC2A1 PE=1 SV=2	1	1	1	1	1	1	3350.1	3003.2	5983.5	4075.2	3545.4	3306.2	3932.9	3531.9	1755.8	1	1	1	1	1	1	1	1	1	1	1	1	1	1	1
P11171-6;P11171-4;P11171-3;P11171-5;P11171-2;P11171	Protein 4.1	EPB41	sp|P11171-6|41_HUMAN Isoform 6 of Protein 4.1 OS=Homo sapiens OX=9606 GN=EPB41;sp|P11171-4|41_HUMAN Isoform 4 of Protein 4.1 OS=Homo sapiens OX=9606 GN=EPB41;sp|P11171-3|41_HUMAN Isoform 3 of Protein 4.1 OS=Homo sapiens OX=9606 GN=EPB41;sp|P11171-5|41_HUMA	1	1	1	1	1	1	1	1973.7	1	1808.9	1851.2	1261.5	3483.3	3718.3	2644.6	2461.9	3804.6	1	1	1	2113.6	2108.3	1	1	1	1280.2	2086.3	1	2291	2826.9
P11217-2;P06737-2;P11217;P06737;P11216	Glycogen phosphorylase, muscle form;Glycogen phosphorylase, liver form;Glycogen phosphorylase, brain form	PYGM;PYGL;PYGB	sp|P11217-2|PYGM_HUMAN Isoform 2 of Glycogen phosphorylase, muscle form OS=Homo sapiens OX=9606 GN=PYGM;sp|P06737-2|PYGL_HUMAN Isoform 2 of Glycogen phosphorylase, liver form OS=Homo sapiens OX=9606 GN=PYGL;sp|P11217|PYGM_HUMAN Glycogen phosphorylase, musc	2320.9	1855.5	1	1	1	1	1	1	2537.4	2084.1	2311.7	1652.5	1966.8	2137.6	1636.2	1	1	1	1	1	1	1316.9	1	1784	1690	1	1	1	1	1
P11387;Q969P6-2;Q969P6	DNA topoisomerase 1	TOP1	sp|P11387|TOP1_HUMAN DNA topoisomerase 1 OS=Homo sapiens OX=9606 GN=TOP1 PE=1 SV=2	169770	149600	188880	212090	196240	185310	142320	147650	109720	108640	149710	148370	113240	109370	205390	217780	149010	148800	220080	196130	177180	183190	145710	148480	140830	142390	196340	201460	179710	181230
P11388;P11388-2;P11388-3;P11388-4;Q02880-2;Q02880	DNA topoisomerase 2-alpha;DNA topoisomerase 2-beta	TOP2A;TOP2B	sp|P11388|TOP2A_HUMAN DNA topoisomerase 2-alpha OS=Homo sapiens OX=9606 GN=TOP2A PE=1 SV=3;sp|P11388-2|TOP2A_HUMAN Isoform 2 of DNA topoisomerase 2-alpha OS=Homo sapiens OX=9606 GN=TOP2A;sp|P11388-3|TOP2A_HUMAN Isoform 3 of DNA topoisomerase 2-alpha OS=Hom	1	1	1	1	1	1	1	1	1	1	1	1	1	1	1	1	1	1	1	1	7531.9	6415.4	1	1	1	1	1	1	1	1
P11586	C-1-tetrahydrofolate synthase, cytoplasmic;Methylenetetrahydrofolate dehydrogenase;Methenyltetrahydrofolate cyclohydrolase;Formyltetrahydrofolate synthetase;C-1-tetrahydrofolate synthase, cytoplasmic, N-terminally processed	MTHFD1	sp|P11586|C1TC_HUMAN C-1-tetrahydrofolate synthase, cytoplasmic OS=Homo sapiens OX=9606 GN=MTHFD1 PE=1 SV=3	11050	8610.8	1	1	1	1	1	3552.3	4595.9	3930.2	4198	4302.4	5833.3	6646.8	4886.5	7062	3021.6	4999.9	3824.5	3105.5	4205.2	4286.9	6483.8	5910.7	6354	6743.1	1	1	3105.4	2664.1
P11908;P11908-2	Ribose-phosphate pyrophosphokinase 2	PRPS2	sp|P11908|PRPS2_HUMAN Ribose-phosphate pyrophosphokinase 2 OS=Homo sapiens OX=9606 GN=PRPS2 PE=1 SV=2;sp|P11908-2|PRPS2_HUMAN Isoform 2 of Ribose-phosphate pyrophosphokinase 2 OS=Homo sapiens OX=9606 GN=PRPS2	37531	39862	43765	40388	24459	24006	1	1	1	1	1	1945.1	1	1	1187.1	1	1	1	13574	18474	20910	19319	24362	22617	7511	6324.5	3534	3964.4	10367	9988.8
P11940-2;P11940;Q9H361;Q13310-2;Q13310;Q13310-3;Q4VXU2;Q4VXU2-2;Q5JQF8	Polyadenylate-binding protein 1;Polyadenylate-binding protein 3	PABPC1;PABPC3	sp|P11940-2|PABP1_HUMAN Isoform 2 of Polyadenylate-binding protein 1 OS=Homo sapiens OX=9606 GN=PABPC1;sp|P11940|PABP1_HUMAN Polyadenylate-binding protein 1 OS=Homo sapiens OX=9606 GN=PABPC1 PE=1 SV=2;sp|Q9H361|PABP3_HUMAN Polyadenylate-binding protein 3 O	16598	17062	4879.9	7116.1	5048.7	5050.7	7006.7	8657	8261.9	8008.1	12244	11908	11754	12221	13153	10633	11618	10370	5436.4	8413.2	13104	13351	11167	10552	13867	11762	6356.8	6466.6	8804	9631
P12004	Proliferating cell nuclear antigen	PCNA	sp|P12004|PCNA_HUMAN Proliferating cell nuclear antigen OS=Homo sapiens OX=9606 GN=PCNA PE=1 SV=1	18380	15297	1	10778	1	1	18409	18588	25693	23624	24674	24554	31814	33652	24068	28260	23417	26057	16861	26435	23322	27190	30147	32034	22364	23333	9907.2	12101	15421	17699
P12236;P12235	ADP/ATP translocase 3;ADP/ATP translocase 3, N-terminally processed;ADP/ATP translocase 1	SLC25A6;SLC25A4	sp|P12236|ADT3_HUMAN ADP/ATP translocase 3 OS=Homo sapiens OX=9606 GN=SLC25A6 PE=1 SV=4;sp|P12235|ADT1_HUMAN ADP/ATP translocase 1 OS=Homo sapiens OX=9606 GN=SLC25A4 PE=1 SV=4	78834	27288	56557	40567	29520	27690	109300	111760	142480	145860	159630	142570	128060	124060	103430	79621	141310	150820	120270	133700	110120	107590	123780	118500	105060	98452	114080	108580	94874	93381
P12277	Creatine kinase B-type	CKB	sp|P12277|KCRB_HUMAN Creatine kinase B-type OS=Homo sapiens OX=9606 GN=CKB PE=1 SV=1	104300	112410	7970.5	7617.2	1	1	8683.3	8848.5	15916	14678	25607	27268	21275	24700	12731	13279	13947	17987	9383.6	10594	19359	15672	43686	45420	66609	75670	10104	3339.8	6435.6	4235.4
P12956;P12956-2	X-ray repair cross-complementing protein 6	XRCC6	sp|P12956|XRCC6_HUMAN X-ray repair cross-complementing protein 6 OS=Homo sapiens OX=9606 GN=XRCC6 PE=1 SV=2;sp|P12956-2|XRCC6_HUMAN Isoform 2 of X-ray repair cross-complementing protein 6 OS=Homo sapiens OX=9606 GN=XRCC6	6881.1	9353.8	1	1	1	1	1	1	6048.9	3057.1	3861.1	4394.3	4030.4	4735.9	3333.4	1	1	2042.4	1	1897.4	7000.1	6629.1	8014.2	5022.3	9373.5	7758.3	1	1	1	1202.7
P13010	X-ray repair cross-complementing protein 5	XRCC5	sp|P13010|XRCC5_HUMAN X-ray repair cross-complementing protein 5 OS=Homo sapiens OX=9606 GN=XRCC5 PE=1 SV=3	12208	11713	1	1	1	1	1	1	1	2405.5	2920.5	2986.7	3768.3	3610.1	2355.3	1	2483.7	1	1	1	4384.8	4075.9	4426.7	4187.4	11937	5908.6	1	1	1	1
P13639	Elongation factor 2	EEF2	sp|P13639|EF2_HUMAN Elongation factor 2 OS=Homo sapiens OX=9606 GN=EEF2 PE=1 SV=4	92302	86803	51954	57173	43103	42702	52717	53837	55769	55140	73955	74998	67051	64425	51333	53985	56658	51783	60199	51816	49872	52611	72600	76701	73584	74628	45778	43592	46724	45292
P13645;CON__P13645;CON__P02535-1;Q7Z3Y7;CON__Q7Z3Y7;CON__Q148H6;CON__Q2M2I5;CON__Q7Z3Y8;Q7Z3Y8;CON__Q99456;Q7Z3Z0;CON__P05784;Q99456;Q2M2I5;CON__Q7Z3Z0;CON__REFSEQ:XP_986630;CON__O76014;CON__Q14525;CON__Q7Z3Y9;CON__O76013;CON__O76015;CON__Q92764;CON__Q9UE12;CON__Q497I4;CON__A2A5Y0;CON__Q15323;CON__Q14532;P05783;O76014;Q92764;O76015;Q14525;Q14532;CON__A2AB72;O76013;O76013-2;Q15323;Q7Z3Y9	Keratin, type I cytoskeletal 10	KRT10	sp|P13645|K1C10_HUMAN Keratin, type I cytoskeletal 10 OS=Homo sapiens OX=9606 GN=KRT10 PE=1 SV=6;	235440	244400	34715	29231	3298400	3408600	18333	6358.8	3647.8	5377.9	30968	32829	13921	13146	13856	13536	28544	21484	1185.1	574.27	5365.1	6038.1	13693	14136	2766	2809.1	24288	25634	100490	96119
P13693;P13693-2;Q56UQ5	Translationally-controlled tumor protein;TPT1-like protein	TPT1	sp|P13693|TCTP_HUMAN Translationally-controlled tumor protein OS=Homo sapiens OX=9606 GN=TPT1 PE=1 SV=1;sp|P13693-2|TCTP_HUMAN Isoform 2 of Translationally-controlled tumor protein OS=Homo sapiens OX=9606 GN=TPT1;sp|Q56UQ5|TPT1L_HUMAN TPT1-like protein OS=	10531	4298.5	1	1	1	1	1	1	1	998.09	1	1968.3	1	2481.2	1209.5	1	1	1	1	1	1888.5	1603.3	2659.4	2521.7	2646.6	3535.2	1	1	1	1
P13797;P13797-3;P13797-2	Plastin-3	PLS3	sp|P13797|PLST_HUMAN Plastin-3 OS=Homo sapiens OX=9606 GN=PLS3 PE=1 SV=4	3996	1	1	1	1	1	1	1	6435.9	1	6895.2	7571.5	7211.2	7829.5	2174.1	1	3143.1	4124.1	1	3318.1	6070.2	5258.2	8479.5	8648.1	11040	8383	1	1	1785.4	1
P14174	Macrophage migration inhibitory factor	MIF	sp|P14174|MIF_HUMAN Macrophage migration inhibitory factor OS=Homo sapiens OX=9606 GN=MIF PE=1 SV=4	88688	50801	1	5619.1	1	1	2122.9	1	6084.1	6653.4	12741	13235	10813	12192	1	1	1	1	1	4078.1	9502	8474.7	20977	19983	28127	30496	1	1	1	1
P14618;P14618-2;P14618-3;P30613-2;P30613	Pyruvate kinase PKM	PKM	sp|P14618|KPYM_HUMAN Pyruvate kinase PKM OS=Homo sapiens OX=9606 GN=PKM PE=1 SV=4;sp|P14618-2|KPYM_HUMAN Isoform M1 of Pyruvate kinase PKM OS=Homo sapiens OX=9606 GN=PKM;sp|P14618-3|KPYM_HUMAN Isoform 3 of Pyruvate kinase PKM OS=Homo sapiens OX=9606 GN=PKM	48313	48988	5605	4005.9	1	1	12557	12377	20544	20475	25352	23267	25650	27389	17753	18214	15935	16912	11478	9640.8	19781	18146	29959	30248	37921	39825	9495.2	5361.8	6074.4	5953.8
P14625	Endoplasmin	HSP90B1	sp|P14625|ENPL_HUMAN Endoplasmin OS=Homo sapiens OX=9606 GN=HSP90B1 PE=1 SV=1	15657	16460	1	1	1	1	1	1	5564.7	3482.6	7051	6557	4588.4	8476.4	1	1	2617.1	1	1	1929.2	3154.6	4178.8	7630.7	7773.5	10016	11124	1	1	1	1
P14678-2;P63162;P14678;P63162-2;P14678-3	Small nuclear ribonucleoprotein-associated proteins B and B;Small nuclear ribonucleoprotein-associated protein N	SNRPB;SNRPN	sp|P14678-2|RSMB_HUMAN Isoform SM-B of Small nuclear ribonucleoprotein-associated proteins B and B OS=Homo sapiens OX=9606 GN=SNRPB;sp|P63162|RSMN_HUMAN Small nuclear ribonucleoprotein-associated protein N OS=Homo sapiens OX=9606 GN=SNRPN PE=1 SV=1;sp|P14	150350	128710	179350	184190	183370	167920	46618	50036	37868	35398	43478	49812	54708	57635	83288	70754	71229	80792	115670	137540	132880	132240	141410	144000	119670	103990	131040	129920	212070	207520
P14866-2;P14866	Heterogeneous nuclear ribonucleoprotein L	HNRNPL	sp|P14866-2|HNRPL_HUMAN Isoform 2 of Heterogeneous nuclear ribonucleoprotein L OS=Homo sapiens OX=9606 GN=HNRNPL;sp|P14866|HNRPL_HUMAN Heterogeneous nuclear ribonucleoprotein L OS=Homo sapiens OX=9606 GN=HNRNPL PE=1 SV=2	1	1	1	1	1	1	1	1	1	1	1	1	2296.6	3074.7	1	1	1	1	1	1	6498.3	7337.6	1	1	1	2533.3	1	1	1	1
P14868-2;P14868	Aspartate--tRNA ligase, cytoplasmic	DARS	sp|P14868-2|SYDC_HUMAN Isoform 2 of Aspartate--tRNA ligase, cytoplasmic OS=Homo sapiens OX=9606 GN=DARS1;sp|P14868|SYDC_HUMAN Aspartate--tRNA ligase, cytoplasmic OS=Homo sapiens OX=9606 GN=DARS1 PE=1 SV=2	1	1	1	1	1	1	1	1	5245.2	4223.7	5693.4	5384.6	5191.5	5601.5	1712.9	1	1733.5	3556.2	1	1	2841.9	1561.7	2411.2	3118.5	1	1	1	1	1	1883.8
P14923	Junction plakoglobin	JUP	sp|P14923|PLAK_HUMAN Junction plakoglobin OS=Homo sapiens OX=9606 GN=JUP PE=1 SV=3	6637.6	4373.6	1	1	1	1	30979	33414	36176	36721	32218	31037	45855	47919	33527	37843	37703	38012	18781	19876	23955	23261	23104	23213	40449	42698	33856	36268	36066	35392
P15056	Serine/threonine-protein kinase B-raf	BRAF	sp|P15056|BRAF_HUMAN Serine/threonine-protein kinase B-raf OS=Homo sapiens OX=9606 GN=BRAF PE=1 SV=4	1	1	1	1	1	1	1	1	1	1	1	1	1	1	1	1	1	1	70224	70977	47662	47769	62947	66216	1	1	1	1	1	1
P15170;P15170-2;P15170-3;Q8IYD1	Eukaryotic peptide chain release factor GTP-binding subunit ERF3A	GSPT1	sp|P15170|ERF3A_HUMAN Eukaryotic peptide chain release factor GTP-binding subunit ERF3A OS=Homo sapiens OX=9606 GN=GSPT1 PE=1 SV=1;sp|P15170-2|ERF3A_HUMAN Isoform 2 of Eukaryotic peptide chain release factor GTP-binding subunit ERF3A OS=Homo sapiens OX=960	1	1359.2	1	1	1	1	1	1	2054.9	1	2801.9	1	1535.7	3781.7	3021.8	1002.5	1	1	1	5291.4	6464.7	5466.9	1	1	2473.1	1	1	1	1	1462.9
P15735;P15735-2	Phosphorylase b kinase gamma catalytic chain, liver/testis isoform	PHKG2	sp|P15735|PHKG2_HUMAN Phosphorylase b kinase gamma catalytic chain, liver/testis isoform OS=Homo sapiens OX=9606 GN=PHKG2 PE=1 SV=1;sp|P15735-2|PHKG2_HUMAN Isoform 2 of Phosphorylase b kinase gamma catalytic chain, liver/testis isoform OS=Homo sapiens OX=9	145380	142340	158250	164280	129180	126850	106170	107080	93182	93800	112490	114190	102730	101720	114580	114040	117450	129240	90264	107680	102160	98570	109870	109070	86448	85090	111550	117170	127950	124820
P15880	40S ribosomal protein S2	RPS2	sp|P15880|RS2_HUMAN 40S ribosomal protein S2 OS=Homo sapiens OX=9606 GN=RPS2 PE=1 SV=2	48876	47895	37654	43337	31538	31972	42936	41704	38935	34745	51682	54748	46320	46314	41301	43386	40643	42849	38041	37194	44422	45738	44142	42989	35815	38501	29823	33568	43351	38612
P15924;P15924-2;P15924-3	Desmoplakin	DSP	sp|P15924|DESP_HUMAN Desmoplakin OS=Homo sapiens OX=9606 GN=DSP PE=1 SV=3;sp|P15924-2|DESP_HUMAN Isoform DPII of Desmoplakin OS=Homo sapiens OX=9606 GN=DSP;sp|P15924-3|DESP_HUMAN Isoform DSPIa of Desmoplakin OS=Homo sapiens OX=9606 GN=DSP	1	1	1	1	1	1	1	1	1	1	1	1	1	1448.8	1	1	1	1	1	1	2262.2	3400.6	1	1	1	1	1	1	1	1
P16152-2;P16152;O75828	Carbonyl reductase [NADPH] 1	CBR1	sp|P16152-2|CBR1_HUMAN Isoform 2 of Carbonyl reductase [NADPH] 1 OS=Homo sapiens OX=9606 GN=CBR1;sp|P16152|CBR1_HUMAN Carbonyl reductase [NADPH] 1 OS=Homo sapiens OX=9606 GN=CBR1 PE=1 SV=3	8214.8	7850.8	1	2752.1	1	2932.4	1	1	3812.5	4144.5	5228.8	1	5253.3	5128.9	4937.9	3256.4	4544.6	3208.3	1	4426.1	4358.3	4610	7806.1	6105.5	5370.4	6499.8	5177.8	1	1	3619.8
P16403	Histone H1.2	HIST1H1C	sp|P16403|H12_HUMAN Histone H1.2 OS=Homo sapiens OX=9606 GN=H1-2 PE=1 SV=2	75562	75151	111580	124160	145770	150080	174520	188600	65742	68560	104010	109910	115710	115630	185630	195080	200320	171920	152620	136360	443460	455050	129870	118980	177390	175380	140910	136970	325210	319000
P16615-5;P16615-2;P16615-3;P16615;P16615-4;Q93084-4;Q93084-2;Q93084-3;Q93084-7;Q93084;Q93084-6;Q93084-5	Sarcoplasmic/endoplasmic reticulum calcium ATPase 2	ATP2A2	sp|P16615-5|AT2A2_HUMAN Isoform 5 of Sarcoplasmic/endoplasmic reticulum calcium ATPase 2 OS=Homo sapiens OX=9606 GN=ATP2A2;sp|P16615-2|AT2A2_HUMAN Isoform 2 of Sarcoplasmic/endoplasmic reticulum calcium ATPase 2 OS=Homo sapiens OX=9606 GN=ATP2A2;sp|P16615-	2935.9	612.72	1	1	1	1	26443	28127	36064	35395	26120	25780	22862	24121	19277	23070	19607	21177	22809	19499	18024	17803	17366	17267	7164.3	7680.8	9092.5	8925.6	7402.1	7007.3
P16989-3;P16989;P16989-2;Q9Y2T7	Y-box-binding protein 3;Y-box-binding protein 2	YBX3;YBX2	sp|P16989-3|YBOX3_HUMAN Isoform 3 of Y-box-binding protein 3 OS=Homo sapiens OX=9606 GN=YBX3;sp|P16989|YBOX3_HUMAN Y-box-binding protein 3 OS=Homo sapiens OX=9606 GN=YBX3 PE=1 SV=4;sp|P16989-2|YBOX3_HUMAN Isoform 2 of Y-box-binding protein 3 OS=Homo sapien	1	1	1	1	1	1	1	1	1	1	1	1	1	1	1	1	1	1	1	1	2380.3	2625.9	1	1	1	1	1	1	1	1
P17066;P48741	Heat shock 70 kDa protein 6	HSPA6	sp|P17066|HSP76_HUMAN Heat shock 70 kDa protein 6 OS=Homo sapiens OX=9606 GN=HSPA6 PE=1 SV=2	238130	236870	240980	246940	228590	245620	331660	306850	248540	260550	270980	282190	282530	278700	294150	329500	317170	272200	333680	251580	211660	219440	225670	236710	255280	248430	260650	251280	257570	241130
P17096;P17096-3	High mobility group protein HMG-I/HMG-Y	HMGA1	sp|P17096|HMGA1_HUMAN High mobility group protein HMG-I/HMG-Y OS=Homo sapiens OX=9606 GN=HMGA1 PE=1 SV=3;sp|P17096-3|HMGA1_HUMAN Isoform HMG-R of High mobility group protein HMG-I/HMG-Y OS=Homo sapiens OX=9606 GN=HMGA1	42036	48646	29061	44195	48898	47429	37590	35982	27941	21118	21220	16881	22701	22231	64583	56854	23212	16920	25936	50648	36773	41068	26577	26962	32256	38803	41453	46529	33614	27982
P17096-2	High mobility group protein HMG-I/HMG-Y	HMGA1	sp|P17096-2|HMGA1_HUMAN Isoform HMG-Y of High mobility group protein HMG-I/HMG-Y OS=Homo sapiens OX=9606 GN=HMGA1	1	8522.4	1	5424.7	4777.9	3705.4	1	10781	5858.9	1	10061	9847	8171.6	7514.1	17434	15992	12940	1	1	14433	10300	12027	9659	11473	10792	10852	12687	1	8811.9	8550.3
P17480-2;P17480	Nucleolar transcription factor 1	UBTF	sp|P17480-2|UBF1_HUMAN Isoform UBF2 of Nucleolar transcription factor 1 OS=Homo sapiens OX=9606 GN=UBTF;sp|P17480|UBF1_HUMAN Nucleolar transcription factor 1 OS=Homo sapiens OX=9606 GN=UBTF PE=1 SV=1	1	4536.8	1	1	1	1	1889.9	1	1	2808.4	6024.4	5873.5	4746.5	4944.7	7256.9	6904.9	4394.2	1	1	5266.9	8532.5	7757.4	3295.7	4359.4	6531.3	4707.5	5506.8	4582.9	8601.6	7584.3
P17612;P17612-2;P22694-10	cAMP-dependent protein kinase catalytic subunit alpha;cAMP-dependent protein kinase catalytic subunit beta	PRKACA;PRKACB	sp|P17612|KAPCA_HUMAN cAMP-dependent protein kinase catalytic subunit alpha OS=Homo sapiens OX=9606 GN=PRKACA PE=1 SV=2;sp|P17612-2|KAPCA_HUMAN Isoform 2 of cAMP-dependent protein kinase catalytic subunit alpha OS=Homo sapiens OX=9606 GN=PRKACA;sp|P22694-1	11374	6578.2	1	3211.2	1	1	11130	12522	6536.6	8484.1	9615.9	9507.3	14424	15042	9199.1	8081	7166.9	8234.6	9900.2	9211.1	7412.4	7886.3	13872	13412	15639	15591	5024.8	1	3206.1	5540
P17707;P17707-2	S-adenosylmethionine decarboxylase proenzyme;S-adenosylmethionine decarboxylase alpha chain;S-adenosylmethionine decarboxylase beta chain	AMD1	sp|P17707|DCAM_HUMAN S-adenosylmethionine decarboxylase proenzyme OS=Homo sapiens OX=9606 GN=AMD1 PE=1 SV=2	34820	28440	31215	32512	35740	36631	24210	25637	21449	24283	21120	20723	26353	28544	27485	32366	31618	34735	37181	31561	27807	25847	31806	31167	27798	30464	31041	32863	29525	29047
P17812;P17812-2;Q9NRF8	CTP synthase 1	CTPS1	sp|P17812|PYRG1_HUMAN CTP synthase 1 OS=Homo sapiens OX=9606 GN=CTPS1 PE=1 SV=2;sp|P17812-2|PYRG1_HUMAN Isoform 2 of CTP synthase 1 OS=Homo sapiens OX=9606 GN=CTPS1	9337.4	6074.5	1	1	1	1	1	3340.6	3174.3	2353.2	5129.7	4624.6	3463.8	4838.4	5914.1	1	1	1	1	1754.4	2391.6	4598.1	3182.1	4969.2	3093.1	3007.2	1	4533.7	1	3514.7
P17844-2;P17844	Probable ATP-dependent RNA helicase DDX5	DDX5	sp|P17844-2|DDX5_HUMAN Isoform 2 of Probable ATP-dependent RNA helicase DDX5 OS=Homo sapiens OX=9606 GN=DDX5;sp|P17844|DDX5_HUMAN Probable ATP-dependent RNA helicase DDX5 OS=Homo sapiens OX=9606 GN=DDX5 PE=1 SV=1	14280	15492	12660	12972	16895	16254	22478	26106	14349	14843	17582	15462	18195	20751	20877	25267	26556	24561	17760	14991	89754	85757	18466	17425	32616	27608	15408	15621	45021	40304
P17858;Q01813	ATP-dependent 6-phosphofructokinase, liver type;ATP-dependent 6-phosphofructokinase, platelet type	PFKL;PFKP	sp|P17858|PFKAL_HUMAN ATP-dependent 6-phosphofructokinase, liver type OS=Homo sapiens OX=9606 GN=PFKL PE=1 SV=6;sp|Q01813|PFKAP_HUMAN ATP-dependent 6-phosphofructokinase, platelet type OS=Homo sapiens OX=9606 GN=PFKP PE=1 SV=2	1	1	1	1	1	1	1	1	3317	3214.9	1	1	1	1	1	1	1	1	1	1	1	1	1	1	1	1	1	1	1	1
P17980	26S protease regulatory subunit 6A	PSMC3	sp|P17980|PRS6A_HUMAN 26S proteasome regulatory subunit 6A OS=Homo sapiens OX=9606 GN=PSMC3 PE=1 SV=3	5258.4	5489.7	1	1	1	1	7007.7	6912.2	7429.1	9137.8	12610	12018	10619	13200	10209	9822.9	7291.6	8622.5	6793.5	9178.7	10038	9881.3	9733.1	8958.6	6679.9	7723.6	3293	3557.8	7388.4	6530.6
P17987	T-complex protein 1 subunit alpha	TCP1	sp|P17987|TCPA_HUMAN T-complex protein 1 subunit alpha OS=Homo sapiens OX=9606 GN=TCP1 PE=1 SV=1	20653	18726	682.47	1	1	1	17302	15961	25354	21022	24433	23922	21669	19157	15652	18439	14127	15764	15889	15436	20267	18291	21492	19191	22863	22877	12078	11709	10987	9647.3
P18077	60S ribosomal protein L35a	RPL35A	sp|P18077|RL35A_HUMAN 60S ribosomal protein L35a OS=Homo sapiens OX=9606 GN=RPL35A PE=1 SV=2	6706.3	7267.1	1	6735.4	1	3746.3	10248	8946.4	8089.7	7063.1	8257.4	10280	7759.5	6921.3	7248.9	6493.7	8669.6	7990.9	1	5037.8	10627	11229	7326.6	6961.8	9298.9	7899.3	1	4175	7622.9	8577.8
P18124	60S ribosomal protein L7	RPL7	sp|P18124|RL7_HUMAN 60S ribosomal protein L7 OS=Homo sapiens OX=9606 GN=RPL7 PE=1 SV=1	46925	40831	36508	37892	25480	28304	48559	55090	42343	42762	58500	66403	52927	56336	47286	51844	52735	48610	40744	44698	64858	63535	53753	52666	48954	49144	32352	35611	49204	49086
P18583-6;P18583-2;P18583-10;P18583-3;P18583-4;P18583-7;P18583;P18583-5;P18583-9;P18583-8	Protein SON	SON	sp|P18583-6|SON_HUMAN Isoform E of Protein SON OS=Homo sapiens OX=9606 GN=SON;sp|P18583-2|SON_HUMAN Isoform A of Protein SON OS=Homo sapiens OX=9606 GN=SON;sp|P18583-10|SON_HUMAN Isoform J of Protein SON OS=Homo sapiens OX=9606 GN=SON;sp|P18583-3|SON_HUMAN	1	1	7066.3	1	1	4993.8	2802.5	1	1	1	1	1	7326.7	7352.8	5891.1	22465	4050	3670.2	11836	12059	11457	15519	6833.3	6500.7	5791.2	6894.9	12569	18454	9063.1	12181
P18621-3;P18621;P18621-2	60S ribosomal protein L17	RPL17	sp|P18621-3|RL17_HUMAN Isoform 3 of 60S ribosomal protein L17 OS=Homo sapiens OX=9606 GN=RPL17;sp|P18621|RL17_HUMAN 60S ribosomal protein L17 OS=Homo sapiens OX=9606 GN=RPL17 PE=1 SV=3;sp|P18621-2|RL17_HUMAN Isoform 2 of 60S ribosomal protein L17 OS=Homo s	10151	9030.9	8872.8	7661.5	846.32	1	7738.4	10949	12424	11256	14106	17574	10194	10882	11271	11015	13606	15436	9382.2	9605.4	17040	14829	12112	11943	10834	10890	12341	14069	12810	14108
P18669;P15259;Q8N0Y7	Phosphoglycerate mutase 1;Phosphoglycerate mutase 2	PGAM1;PGAM2	sp|P18669|PGAM1_HUMAN Phosphoglycerate mutase 1 OS=Homo sapiens OX=9606 GN=PGAM1 PE=1 SV=2;sp|P15259|PGAM2_HUMAN Phosphoglycerate mutase 2 OS=Homo sapiens OX=9606 GN=PGAM2 PE=1 SV=3	24599	14434	1	1	1	1	1	1	1472.6	1	2254.1	1	1	2363.7	1	1	1	1	1	1	1	1394.5	3611.6	5046.3	11222	12337	1	1	1	1
P19022-2;P19022	Cadherin-2	CDH2	sp|P19022-2|CADH2_HUMAN Isoform 2 of Cadherin-2 OS=Homo sapiens OX=9606 GN=CDH2;sp|P19022|CADH2_HUMAN Cadherin-2 OS=Homo sapiens OX=9606 GN=CDH2 PE=1 SV=4	1	1	1	1	1	1	1	1627.2	2663.3	2124.7	4374.7	2861.4	4406.4	5433.4	1	3210.9	1687.2	4423.1	1	839.77	3696.3	1	1	1	1	1639.1	1	1	1	1
P19086	Guanine nucleotide-binding protein G(z) subunit alpha	GNAZ	sp|P19086|GNAZ_HUMAN Guanine nucleotide-binding protein G(z) subunit alpha OS=Homo sapiens OX=9606 GN=GNAZ PE=1 SV=3	1	1	1	1	1	1	1	1	9236.4	6991.3	6802	4040.4	5823.8	9494.4	6957.3	6935.8	5957.6	1	1	1	1	1	1	1	1	2975.3	1	1	1	1168.2
P19338	Nucleolin	NCL	sp|P19338|NUCL_HUMAN Nucleolin OS=Homo sapiens OX=9606 GN=NCL PE=1 SV=3	27610	22890	4307.3	1	1	1	7401.9	8890.2	8909.7	7072.2	14667	11974	16802	17996	14745	18021	13221	15337	8196.8	8727.3	42734	38194	22934	19999	26495	29526	8690.3	6109.3	13590	13438
P19474;P19474-2	E3 ubiquitin-protein ligase TRIM21	TRIM21	sp|P19474|RO52_HUMAN E3 ubiquitin-protein ligase TRIM21 OS=Homo sapiens OX=9606 GN=TRIM21 PE=1 SV=1;sp|P19474-2|RO52_HUMAN Isoform 2 of E3 ubiquitin-protein ligase TRIM21 OS=Homo sapiens OX=9606 GN=TRIM21	1454900	1414900	1624400	1674000	1421100	1307200	1086900	1068500	966430	991730	992770	1073200	1135800	1122100	1206900	1105300	1444200	1422000	1197200	1309900	1032300	1069500	1504800	1536800	1274900	1262400	1570500	1608100	1652500	1605600
P20290-2;P20290	Transcription factor BTF3	BTF3	sp|P20290-2|BTF3_HUMAN Isoform 2 of Transcription factor BTF3 OS=Homo sapiens OX=9606 GN=BTF3;sp|P20290|BTF3_HUMAN Transcription factor BTF3 OS=Homo sapiens OX=9606 GN=BTF3 PE=1 SV=1	5066.9	5869.5	1	1	1	1	8597.2	7847.8	3617.8	3415.9	4748	4379.9	4001.3	4088.2	5401.8	4081.7	3456.9	2631.7	8427.8	7514.3	5585.7	5869	4205.3	4726	5457.6	4586.4	8722.4	7594.8	1	3825.3
P20340-4;Q9NRW1-2;Q9NRW1;P20340-2;P20340;Q14964	Ras-related protein Rab-6A;Ras-related protein Rab-6B;Ras-related protein Rab-39A	RAB6A;RAB6B;RAB39A	sp|P20340-4|RAB6A_HUMAN Isoform 4 of Ras-related protein Rab-6A OS=Homo sapiens OX=9606 GN=RAB6A;sp|Q9NRW1-2|RAB6B_HUMAN Isoform 2 of Ras-related protein Rab-6B OS=Homo sapiens OX=9606 GN=RAB6B;sp|Q9NRW1|RAB6B_HUMAN Ras-related protein Rab-6B OS=Homo sapie	11728	12274	1	1	1	1	24412	26300	29835	31493	24325	21390	22510	22429	18488	23744	21431	19869	17113	12612	12892	14463	16945	16418	16981	20146	7187.2	6625.5	10239	6385.6
P20674	Cytochrome c oxidase subunit 5A, mitochondrial	COX5A	sp|P20674|COX5A_HUMAN Cytochrome c oxidase subunit 5A, mitochondrial OS=Homo sapiens OX=9606 GN=COX5A PE=1 SV=2	2858.6	2850.2	1	1	1	1	1	1	1	1	1421.4	1	2030.7	1	1	1	1	1	1	1	1	1	1	2102.8	2553.8	3782.6	1	1	1	1
P20700;Q03252	Lamin-B1	LMNB1	sp|P20700|LMNB1_HUMAN Lamin-B1 OS=Homo sapiens OX=9606 GN=LMNB1 PE=1 SV=2	1	1	1	1	1	1	10514	11215	11196	9811.8	6715.5	6580	10050	10291	13525	15388	13435	10845	826.89	2464.4	19294	19738	2848.9	2528	7348.6	7162.8	5515.9	4468.4	11635	11803
P21127;Q9UQ88-5;Q9UQ88;P21127-2;P21127-3;Q9UQ88-2;Q9UQ88-3;P21127-8;Q9UQ88-4;P21127-9;P21127-6;P21127-10;P21127-5;P21127-4;Q9UQ88-10;P21127-12;Q9UQ88-8;Q9UQ88-9	Cyclin-dependent kinase 11B;Cyclin-dependent kinase 11A	CDK11B;CDK11A	sp|P21127|CD11B_HUMAN Cyclin-dependent kinase 11B OS=Homo sapiens OX=9606 GN=CDK11B PE=1 SV=4;sp|Q9UQ88-5|CD11A_HUMAN Isoform SV7 of Cyclin-dependent kinase 11A OS=Homo sapiens OX=9606 GN=CDK11A;sp|Q9UQ88|CD11A_HUMAN Cyclin-dependent kinase 11A OS=Homo sap	5589.6	4627.6	5212.1	8514.9	10039	10011	9599.3	9438.6	5496.2	6046.2	5491.4	6144	6208.5	7012.9	10685	12708	6603.2	5880.2	15731	12881	9553.2	9364	6539.9	7054.1	7733.4	7208.9	12667	12723	9472	8628.1
P21281;P15313	V-type proton ATPase subunit B, brain isoform	ATP6V1B2	sp|P21281|VATB2_HUMAN V-type proton ATPase subunit B, brain isoform OS=Homo sapiens OX=9606 GN=ATP6V1B2 PE=1 SV=3	1	1	1	1	1	1	75251	72431	70875	62482	86322	84263	49902	50035	24823	29914	30574	33139	1723.2	2059	1	1	305.5	1	5651.4	4916.6	5451.7	4163.1	1219.9	1
P21283	V-type proton ATPase subunit C 1	ATP6V1C1	sp|P21283|VATC1_HUMAN V-type proton ATPase subunit C 1 OS=Homo sapiens OX=9606 GN=ATP6V1C1 PE=1 SV=4	1	1	1	1	1	1	9634.3	11438	8564.5	6309.6	9239.8	10328	5248.2	4801.6	1078.3	1	1	1	1	1	1	1	1	1	1	1	1	1	1	1
P21333-2;P21333;O75369-5;O75369-4;O75369-6;O75369-3;O75369-2;O75369-9;O75369;O75369-8;Q14315-2;Q14315	Filamin-A	FLNA	sp|P21333-2|FLNA_HUMAN Isoform 2 of Filamin-A OS=Homo sapiens OX=9606 GN=FLNA;sp|P21333|FLNA_HUMAN Filamin-A OS=Homo sapiens OX=9606 GN=FLNA PE=1 SV=4	18768	17234	17232	22090	17235	19714	11369	13068	8160.1	8051.8	10348	10253	13138	13075	14246	15533	13149	11809	21143	16524	16490	17332	18713	19990	16861	16633	12838	13466	18659	19023
P21741;P21741-2	Midkine	MDK	sp|P21741|MK_HUMAN Midkine OS=Homo sapiens OX=9606 GN=MDK PE=1 SV=1;sp|P21741-2|MK_HUMAN Isoform 2 of Midkine OS=Homo sapiens OX=9606 GN=MDK	150340	156210	44986	57831	36001	32570	12836	16152	28466	30005	21689	25105	100950	96077	73593	71870	37005	33075	81951	82386	54256	55030	104730	110500	64250	67090	54258	54640	36907	34988
P21796	Voltage-dependent anion-selective channel protein 1	VDAC1	sp|P21796|VDAC1_HUMAN Voltage-dependent anion-selective channel protein 1 OS=Homo sapiens OX=9606 GN=VDAC1 PE=1 SV=2	6533.4	6391.6	1	1	1	1	1	3360.9	7419.4	7319	5422.2	6129.2	5363.3	5645.1	3801.4	2825.4	1743.1	3955.3	1	1133.6	1	1569.6	4135.7	3731.5	14047	10347	1	1	1	1
P22087	rRNA 2-O-methyltransferase fibrillarin	FBL	sp|P22087|FBRL_HUMAN rRNA 2-O-methyltransferase fibrillarin OS=Homo sapiens OX=9606 GN=FBL PE=1 SV=2	20211	16511	19734	24488	33033	28222	34344	34284	25705	23557	28673	26820	24801	24459	26075	20514	25879	23329	18964	26424	52968	54938	25737	22554	25021	22659	25509	26768	36452	37062
P22102;P22102-2	Trifunctional purine biosynthetic protein adenosine-3;Phosphoribosylamine--glycine ligase;Phosphoribosylformylglycinamidine cyclo-ligase;Phosphoribosylglycinamide formyltransferase	GART	sp|P22102|PUR2_HUMAN Trifunctional purine biosynthetic protein adenosine-3 OS=Homo sapiens OX=9606 GN=GART PE=1 SV=1;sp|P22102-2|PUR2_HUMAN Isoform Short of Trifunctional purine biosynthetic protein adenosine-3 OS=Homo sapiens OX=9606 GN=GART	14710	19739	1	1	1	1	1	1618.9	2217.2	685.87	4991.6	4375.8	4289.5	4879.5	3577	1	3343.9	1	3778	657.01	3419.2	3660.2	4627.1	6029.9	5337.1	9418.5	1	1	1547.2	2028
P22234;P22234-2	Multifunctional protein ADE2;Phosphoribosylaminoimidazole-succinocarboxamide synthase;Phosphoribosylaminoimidazole carboxylase	PAICS	sp|P22234|PUR6_HUMAN Multifunctional protein ADE2 OS=Homo sapiens OX=9606 GN=PAICS PE=1 SV=3;sp|P22234-2|PUR6_HUMAN Isoform 2 of Multifunctional protein ADE2 OS=Homo sapiens OX=9606 GN=PAICS	18205	17354	4992.9	4805.1	2401.9	4678.3	8218	11565	8959.3	8970	12231	12593	13189	13112	8833.2	12162	12421	10512	1	9371	9123	9386.1	14444	16830	19866	19943	6393.9	5866.2	5521.4	6251.5
P22314-2;P22314	Ubiquitin-like modifier-activating enzyme 1	UBA1	sp|P22314-2|UBA1_HUMAN Isoform 2 of Ubiquitin-like modifier-activating enzyme 1 OS=Homo sapiens OX=9606 GN=UBA1;sp|P22314|UBA1_HUMAN Ubiquitin-like modifier-activating enzyme 1 OS=Homo sapiens OX=9606 GN=UBA1 PE=1 SV=3	14809	14014	1	1	1	1	1	1	2726.1	1380.5	5779.6	5518.6	5577.1	7289	3394.1	2032.5	1785.9	1	577.18	762.22	3418.2	1656	9692.2	11278	16239	14651	1	1	1	1
P22392;P22392-2;O60361;P15531;P15531-2	Nucleoside diphosphate kinase B;Putative nucleoside diphosphate kinase;Nucleoside diphosphate kinase A	NME2;NME2P1;NME1	sp|P22392|NDKB_HUMAN Nucleoside diphosphate kinase B OS=Homo sapiens OX=9606 GN=NME2 PE=1 SV=1;sp|P22392-2|NDKB_HUMAN Isoform 3 of Nucleoside diphosphate kinase B OS=Homo sapiens OX=9606 GN=NME2;sp|O60361|NDK8_HUMAN Putative nucleoside diphosphate kinase O	15124	15261	1	1	1	1	1	1	4071	2198.7	4424.4	5280.7	6572.4	5373.5	3245.7	1	1	1	1	2759.3	3742.4	4072.2	10982	10401	10933	11863	1	1	1	2193.3
P22626;P22626-2	Heterogeneous nuclear ribonucleoproteins A2/B1	HNRNPA2B1	sp|P22626|ROA2_HUMAN Heterogeneous nuclear ribonucleoproteins A2/B1 OS=Homo sapiens OX=9606 GN=HNRNPA2B1 PE=1 SV=2;sp|P22626-2|ROA2_HUMAN Isoform A2 of Heterogeneous nuclear ribonucleoproteins A2/B1 OS=Homo sapiens OX=9606 GN=HNRNPA2B1	9786.5	7048.5	4098.8	3541.6	12356	12865	18710	19066	7269.8	5762.7	10119	10585	15475	14863	15189	12380	20525	20574	5156.4	9323.9	102110	91834	18060	12888	24649	26075	5043.2	3329.6	37209	43079
P22694-4;P22694-3;P22694;P22694-5;P22694-7;P22694-6;P22694-9;P22694-2;P22694-8	cAMP-dependent protein kinase catalytic subunit beta	PRKACB	sp|P22694-4|KAPCB_HUMAN Isoform 4 of cAMP-dependent protein kinase catalytic subunit beta OS=Homo sapiens OX=9606 GN=PRKACB;sp|P22694-3|KAPCB_HUMAN Isoform 3 of cAMP-dependent protein kinase catalytic subunit beta OS=Homo sapiens OX=9606 GN=PRKACB;sp|P2269	1	1	1	1	1	1	1	1	2244.2	3281.1	4156.3	2606	5094	4725.9	4254.4	3997	2994	3670.8	3014.9	3193.1	3427.4	3726.7	3802.3	3508.1	1	2376	1	1	1	1
P22695	Cytochrome b-c1 complex subunit 2, mitochondrial	UQCRC2	sp|P22695|QCR2_HUMAN Cytochrome b-c1 complex subunit 2, mitochondrial OS=Homo sapiens OX=9606 GN=UQCRC2 PE=1 SV=3	3007.9	3599.1	1	1	1	1	5411.3	7127.4	10758	9898.7	7659.8	7780.3	7258.4	7478.7	5637.2	3088.5	4975.1	5235.2	5909.1	7342.6	10031	9063.3	6559.8	6240.3	7492.8	8187.6	5393.2	7195.7	4680.6	4910
P23246;P23246-2	Splicing factor, proline- and glutamine-rich	SFPQ	sp|P23246|SFPQ_HUMAN Splicing factor, proline- and glutamine-rich OS=Homo sapiens OX=9606 GN=SFPQ PE=1 SV=2;sp|P23246-2|SFPQ_HUMAN Isoform Short of Splicing factor, proline- and glutamine-rich OS=Homo sapiens OX=9606 GN=SFPQ	22796	21688	3920.7	14534	12310	13058	17078	18660	19806	17894	15116	14371	31490	32740	23203	20269	20359	15511	13074	18256	34227	31034	18802	19050	22627	19883	12330	9995.9	17080	16652
P23284	Peptidyl-prolyl cis-trans isomerase B	PPIB	sp|P23284|PPIB_HUMAN Peptidyl-prolyl cis-trans isomerase B OS=Homo sapiens OX=9606 GN=PPIB PE=1 SV=2	117830	104410	93051	96086	113030	104250	69110	73469	55678	51813	59484	61067	56696	54090	65475	59392	41805	39281	63013	69608	45386	50447	56449	51226	70273	70881	69047	71249	57940	57438
P23396;P23396-2	40S ribosomal protein S3	RPS3	sp|P23396|RS3_HUMAN 40S ribosomal protein S3 OS=Homo sapiens OX=9606 GN=RPS3 PE=1 SV=2;sp|P23396-2|RS3_HUMAN Isoform 2 of 40S ribosomal protein S3 OS=Homo sapiens OX=9606 GN=RPS3	84336	71617	73691	76641	68645	64615	69094	75933	69560	67586	87124	89403	74216	75730	75392	87752	80200	79801	75038	72617	82990	79619	75976	74708	76345	73360	65042	64041	76928	75569
P23458	Tyrosine-protein kinase JAK1	JAK1	sp|P23458|JAK1_HUMAN Tyrosine-protein kinase JAK1 OS=Homo sapiens OX=9606 GN=JAK1 PE=1 SV=2	1	1	1	1	1	1	1	2454.2	1	1	1455	1856.9	5215.7	4299.4	5339.4	4238.4	3434.5	2665.8	1550.8	2434.6	2350.1	2675	1671.6	1	3909.1	4332.6	3443.2	4677.1	4790.2	5088.2
P23526;P23526-2	Adenosylhomocysteinase	AHCY	sp|P23526|SAHH_HUMAN Adenosylhomocysteinase OS=Homo sapiens OX=9606 GN=AHCY PE=1 SV=4;sp|P23526-2|SAHH_HUMAN Isoform 2 of Adenosylhomocysteinase OS=Homo sapiens OX=9606 GN=AHCY	15980	9308.6	1	1	1	1	8337.8	9357.6	14855	16072	8237	9086.3	12690	13752	12539	12460	13500	10913	3729.2	3209.7	4349.5	6045.6	5326.7	6429.5	6262.1	6700.7	1	1	1501.6	1773
P23528;Q9Y281-3;Q9Y281	Cofilin-1	CFL1	sp|P23528|COF1_HUMAN Cofilin-1 OS=Homo sapiens OX=9606 GN=CFL1 PE=1 SV=3	106220	123300	66474	61151	54635	54455	51726	60968	62850	58745	78064	80360	78319	78927	55113	75813	70362	75679	66565	55010	60142	61597	98005	97597	115930	117820	55591	48036	62606	58411
P23588;P23588-2	Eukaryotic translation initiation factor 4B	EIF4B	sp|P23588|IF4B_HUMAN Eukaryotic translation initiation factor 4B OS=Homo sapiens OX=9606 GN=EIF4B PE=1 SV=2;sp|P23588-2|IF4B_HUMAN Isoform 2 of Eukaryotic translation initiation factor 4B OS=Homo sapiens OX=9606 GN=EIF4B	42405	41254	57611	65152	57944	63420	24244	25501	13429	13325	20810	20839	23637	22035	26791	21623	27488	20437	40023	42598	51753	51971	40116	41292	34564	36824	38105	34474	58481	57629
P23921	Ribonucleoside-diphosphate reductase large subunit	RRM1	sp|P23921|RIR1_HUMAN Ribonucleoside-diphosphate reductase large subunit OS=Homo sapiens OX=9606 GN=RRM1 PE=1 SV=1	1339.1	1937.5	1	1	1	1	1	1	1	1	1	1	1	1	1	1	1	1	1	1	1	1	1	1	1105.9	1	1	1	1	1
P24534	Elongation factor 1-beta	EEF1B2	sp|P24534|EF1B_HUMAN Elongation factor 1-beta OS=Homo sapiens OX=9606 GN=EEF1B2 PE=1 SV=3	31326	19958	10321	8106.8	1	6640.7	15137	13934	17950	18868	19596	21486	17735	14631	12970	21331	14040	10827	15141	12863	16988	15742	20659	20312	23142	22496	12442	12396	9467.8	9625.2
P25205;P25205-2	DNA replication licensing factor MCM3	MCM3	sp|P25205|MCM3_HUMAN DNA replication licensing factor MCM3 OS=Homo sapiens OX=9606 GN=MCM3 PE=1 SV=3;sp|P25205-2|MCM3_HUMAN Isoform 2 of DNA replication licensing factor MCM3 OS=Homo sapiens OX=9606 GN=MCM3	6696.3	3672.5	1	4013.3	1	1	1	1	1487	1	4007.3	2600.5	4239.6	4435.7	2421.6	4551.7	1	2717.8	3843.3	2845.4	12924	11982	6635.5	5700.5	6035.6	9986.5	1	1	4512.5	4128.2
P25398	40S ribosomal protein S12	RPS12	sp|P25398|RS12_HUMAN 40S ribosomal protein S12 OS=Homo sapiens OX=9606 GN=RPS12 PE=1 SV=3	38476	38024	17738	14104	13124	6397.2	10783	10758	22132	19808	23336	26515	21977	24102	15559	14625	21855	22344	16549	18630	23822	20457	29020	26196	27486	27002	12177	10856	16324	17619
P25705;P25705-2;P25705-3	ATP synthase subunit alpha, mitochondrial	ATP5A1	sp|P25705|ATPA_HUMAN ATP synthase subunit alpha, mitochondrial OS=Homo sapiens OX=9606 GN=ATP5F1A PE=1 SV=1;sp|P25705-2|ATPA_HUMAN Isoform 2 of ATP synthase subunit alpha, mitochondrial OS=Homo sapiens OX=9606 GN=ATP5F1A;sp|P25705-3|ATPA_HUMAN Isoform 3 of	30477	29855	5489.4	7931.4	1421	1946.5	36771	37873	46392	48207	42642	42882	51081	52684	46381	52548	49770	54868	37909	32875	35598	34664	42388	41746	43186	41878	30461	30083	26945	26975
P25789	Proteasome subunit alpha type-4	PSMA4	sp|P25789|PSA4_HUMAN Proteasome subunit alpha type-4 OS=Homo sapiens OX=9606 GN=PSMA4 PE=1 SV=1	14137	25733	22752	22166	10100	1048	8634.7	2990.3	5682.1	4619.5	3925.8	2285.4	10219	8705.6	8629.6	12640	13522	15924	13196	9821.2	10625	9921.1	9610.4	8302.8	17051	16599	13517	12639	19755	17570
P26368-2;P26368	Splicing factor U2AF 65 kDa subunit	U2AF2	sp|P26368-2|U2AF2_HUMAN Isoform 2 of Splicing factor U2AF 65 kDa subunit OS=Homo sapiens OX=9606 GN=U2AF2;sp|P26368|U2AF2_HUMAN Splicing factor U2AF 65 kDa subunit OS=Homo sapiens OX=9606 GN=U2AF2 PE=1 SV=4	550200	568300	511460	478610	501310	425360	390080	377610	423220	421540	397640	384940	436270	462770	460120	471700	460180	483170	677590	704130	459460	479210	552450	552670	575750	579440	705790	770190	555350	563200
P26373;P26373-2	60S ribosomal protein L13	RPL13	sp|P26373|RL13_HUMAN 60S ribosomal protein L13 OS=Homo sapiens OX=9606 GN=RPL13 PE=1 SV=4;sp|P26373-2|RL13_HUMAN Isoform 2 of 60S ribosomal protein L13 OS=Homo sapiens OX=9606 GN=RPL13	25824	21464	18773	21712	17277	17590	33643	34267	27946	27971	40904	42001	32680	33075	32557	33927	34789	32112	30237	26732	38745	37931	30926	28585	27808	26597	22283	20833	30556	32165
P26583	High mobility group protein B2	HMGB2	sp|P26583|HMGB2_HUMAN High mobility group protein B2 OS=Homo sapiens OX=9606 GN=HMGB2 PE=1 SV=2	14173	11573	10737	13882	10898	11230	6848.8	9491	4205.3	2885.7	5105.1	2751.9	4916.1	4883.5	10857	5248.2	6857.1	6313.3	3833.9	14144	11128	13571	9676.1	9413.6	11918	9913.2	11527	11892	8351.2	8259.2
P26599;P26599-2;P26599-3	Polypyrimidine tract-binding protein 1	PTBP1	sp|P26599|PTBP1_HUMAN Polypyrimidine tract-binding protein 1 OS=Homo sapiens OX=9606 GN=PTBP1 PE=1 SV=1;sp|P26599-2|PTBP1_HUMAN Isoform 2 of Polypyrimidine tract-binding protein 1 OS=Homo sapiens OX=9606 GN=PTBP1;sp|P26599-3|PTBP1_HUMAN Isoform 3 of Polypy	12632	10371	2899.9	4267.5	1	1	3271	3948.6	5638.9	3778.3	6362.8	5520.9	5982.8	7411.9	7761.7	4385.6	7010.9	3752.7	1	3934.5	8257.2	9569.6	10419	7430.3	11264	10133	3789.7	1	5026.3	5259.2
P26641;P26641-2	Elongation factor 1-gamma	EEF1G	sp|P26641|EF1G_HUMAN Elongation factor 1-gamma OS=Homo sapiens OX=9606 GN=EEF1G PE=1 SV=3;sp|P26641-2|EF1G_HUMAN Isoform 2 of Elongation factor 1-gamma OS=Homo sapiens OX=9606 GN=EEF1G	47775	45508	26075	26494	15178	17146	43808	43796	48452	41271	48849	47233	46421	46355	33915	37555	34944	36791	42547	32543	34219	33699	42438	41975	49066	48824	25808	20772	26988	23448
P27105;P27105-2	Erythrocyte band 7 integral membrane protein	STOM	sp|P27105|STOM_HUMAN Erythrocyte band 7 integral membrane protein OS=Homo sapiens OX=9606 GN=STOM PE=1 SV=3	8172.8	4185.4	5271.6	6420.6	11502	1	666120	865350	416650	429900	722920	570530	521630	521070	248220	266510	660220	637740	332630	366320	213170	298750	382390	283170	568150	559350	780690	569440	760380	539510
P27348	14-3-3 protein theta	YWHAQ	sp|P27348|1433T_HUMAN 14-3-3 protein theta OS=Homo sapiens OX=9606 GN=YWHAQ PE=1 SV=1	19097	15777	1	1	1	1	13941	14655	12947	13046	13413	14456	13965	12652	11927	13785	12746	11572	36923	33370	26516	31290	47205	43391	13750	14665	8290.5	8888.7	7338.9	7195
P27635;Q96L21	60S ribosomal protein L10	RPL10	sp|P27635|RL10_HUMAN 60S ribosomal protein L10 OS=Homo sapiens OX=9606 GN=RPL10 PE=1 SV=4	14148	11066	5328.4	4446	1830.3	1466.1	18214	17204	15804	14394	22155	21168	17468	17268	17080	15762	13817	16151	9425.4	13006	22339	21343	15216	12847	13333	8941.2	8009.2	9355.9	11489	15119
P27708	CAD protein;Glutamine-dependent carbamoyl-phosphate synthase;Aspartate carbamoyltransferase;Dihydroorotase	CAD	sp|P27708|PYR1_HUMAN CAD protein OS=Homo sapiens OX=9606 GN=CAD PE=1 SV=3	15433	5003.9	2955.6	9171.2	1	2923.4	17579	13955	18979	17875	17929	17443	21725	23100	23377	24081	19169	21136	21158	23444	22248	21185	22447	21588	15040	12864	13148	14025	16167	13134
P27797	Calreticulin	CALR	sp|P27797|CALR_HUMAN Calreticulin OS=Homo sapiens OX=9606 GN=CALR PE=1 SV=1	10988	8401.3	1	1	1	1	1	1	1	1	1883.8	2482.8	3196.2	2251.7	1	1	1	1	1	1	1	1	5129.8	3442.2	4176.2	7347.3	1	1	1	1
P27824-2;P27824;P27824-3	Calnexin	CANX	sp|P27824-2|CALX_HUMAN Isoform 2 of Calnexin OS=Homo sapiens OX=9606 GN=CANX;sp|P27824|CALX_HUMAN Calnexin OS=Homo sapiens OX=9606 GN=CANX PE=1 SV=2	12100	9909	1	1	1	1	1	1	4505.7	3766.5	2886.3	3900.2	4993.3	6498.3	2894.3	1	1	1	1	2249	2191.1	1681.2	3566.3	2874.9	6527.9	4221.9	1	1	1	1
P27986-5;P27986-3;P27986-2;P27986;P27986-4	Phosphatidylinositol 3-kinase regulatory subunit alpha	PIK3R1	sp|P27986-5|P85A_HUMAN Isoform 5 of Phosphatidylinositol 3-kinase regulatory subunit alpha OS=Homo sapiens OX=9606 GN=PIK3R1;sp|P27986-3|P85A_HUMAN Isoform 3 of Phosphatidylinositol 3-kinase regulatory subunit alpha OS=Homo sapiens OX=9606 GN=PIK3R1;sp|P27	1	1	1	1	1	1	14947	16393	16445	17036	14087	13659	13502	12409	10329	13282	13722	13021	9455.7	6666.9	8048.9	7639.9	7076.1	7876	9970.7	11999	9208.8	10330	12063	11255
P28066-2;P28066	Proteasome subunit alpha type-5	PSMA5	sp|P28066-2|PSA5_HUMAN Isoform 2 of Proteasome subunit alpha type-5 OS=Homo sapiens OX=9606 GN=PSMA5;sp|P28066|PSA5_HUMAN Proteasome subunit alpha type-5 OS=Homo sapiens OX=9606 GN=PSMA5 PE=1 SV=3	3009.9	2923.5	1	1	1	1	2693.2	2665.9	2859.8	2957	3364.4	2249.1	2789.4	2610.6	3709.2	3225.7	2723.2	1	1	1971.5	2643.1	2544.4	928.12	1	1	2180.5	1	1	1	1
P28288;P28288-2	ATP-binding cassette sub-family D member 3	ABCD3	sp|P28288|ABCD3_HUMAN ATP-binding cassette sub-family D member 3 OS=Homo sapiens OX=9606 GN=ABCD3 PE=1 SV=1;sp|P28288-2|ABCD3_HUMAN Isoform 2 of ATP-binding cassette sub-family D member 3 OS=Homo sapiens OX=9606 GN=ABCD3	1	1	1	1	1	1	37712	36094	65212	61225	43551	43289	37961	38985	22823	18735	27426	33239	8332.7	14356	15248	14344	13657	14071	10039	9223.5	10344	9968.6	7804	9721.7
P29372-5;P29372-4;P29372-2;P29372	DNA-3-methyladenine glycosylase	MPG	sp|P29372-5|3MG_HUMAN Isoform 4 of DNA-3-methyladenine glycosylase OS=Homo sapiens OX=9606 GN=MPG;sp|P29372-4|3MG_HUMAN Isoform 3 of DNA-3-methyladenine glycosylase OS=Homo sapiens OX=9606 GN=MPG;sp|P29372-2|3MG_HUMAN Isoform 2 of DNA-3-methyladenine glyco	1	1	1	1	1	1	1	1	2743.9	2070.4	2355	1	1	3882.8	3593.8	1	1	1	1	3460.9	2823.9	3833	1	2102.3	1	3407	1	1	1	1
P29401;P29401-2	Transketolase	TKT	sp|P29401|TKT_HUMAN Transketolase OS=Homo sapiens OX=9606 GN=TKT PE=1 SV=3;sp|P29401-2|TKT_HUMAN Isoform 2 of Transketolase OS=Homo sapiens OX=9606 GN=TKT	1	1	1	1	1	1	1	1	1	1	1	1	1	1	1	1	1	1	1	1	1	1	1	2286.7	2548.6	2729.8	1	1	1	1
P29692-3;P29692;P29692-2;P29692-4	Elongation factor 1-delta	EEF1D	sp|P29692-3|EF1D_HUMAN Isoform 3 of Elongation factor 1-delta OS=Homo sapiens OX=9606 GN=EEF1D;sp|P29692|EF1D_HUMAN Elongation factor 1-delta OS=Homo sapiens OX=9606 GN=EEF1D PE=1 SV=5;sp|P29692-2|EF1D_HUMAN Isoform 2 of Elongation factor 1-delta OS=Homo s	14839	9859.1	1	1	1	1	10936	12978	12173	11685	12475	13285	13263	13710	9428.2	11791	10350	8660.6	7305.7	5448	8401.1	8375.2	11152	11405	13326	12748	3342	2095.6	2559.3	4002.3
P29992;P50148;O95837	Guanine nucleotide-binding protein subunit alpha-11;Guanine nucleotide-binding protein G(q) subunit alpha	GNA11;GNAQ	sp|P29992|GNA11_HUMAN Guanine nucleotide-binding protein subunit alpha-11 OS=Homo sapiens OX=9606 GN=GNA11 PE=1 SV=2;sp|P50148|GNAQ_HUMAN Guanine nucleotide-binding protein G(q) subunit alpha OS=Homo sapiens OX=9606 GN=GNAQ PE=1 SV=4	1	1	1	1	1	1	8270.4	9130.9	9173.9	9285.6	8674.6	8045.1	10475	11166	10957	12741	12215	11591	6431.4	5824.1	6310.1	5942.5	6996.6	6967.1	10203	12624	7971.8	8093.2	9437.8	8610.8
P30041	Peroxiredoxin-6	PRDX6	sp|P30041|PRDX6_HUMAN Peroxiredoxin-6 OS=Homo sapiens OX=9606 GN=PRDX6 PE=1 SV=3	60413	45992	33644	26352	9393.1	20599	14840	18134	30851	32604	43346	41067	43932	47785	29978	32021	31572	35574	33419	37744	36541	32688	57374	58091	62096	67920	36053	33676	32845	33373
P30048-2;P30048	Thioredoxin-dependent peroxide reductase, mitochondrial	PRDX3	sp|P30048-2|PRDX3_HUMAN Isoform 2 of Thioredoxin-dependent peroxide reductase, mitochondrial OS=Homo sapiens OX=9606 GN=PRDX3;sp|P30048|PRDX3_HUMAN Thioredoxin-dependent peroxide reductase, mitochondrial OS=Homo sapiens OX=9606 GN=PRDX3 PE=1 SV=3	37202	27274	12387	12630	5309.6	1	5877.9	654.04	7947.1	7728	9544.2	9856	12105	16161	9151.8	18930	11649	16249	17503	16925	16638	15180	20926	23035	28332	30949	14590	13933	19148	15667
P30050;P30050-2	60S ribosomal protein L12	RPL12	sp|P30050|RL12_HUMAN 60S ribosomal protein L12 OS=Homo sapiens OX=9606 GN=RPL12 PE=1 SV=1;sp|P30050-2|RL12_HUMAN Isoform 2 of 60S ribosomal protein L12 OS=Homo sapiens OX=9606 GN=RPL12	28036	30230	19175	15949	11619	12228	22269	23635	23174	23719	27541	27759	25045	24254	25838	27720	27595	31291	22393	20129	29131	28885	25353	24402	24761	24022	14519	13544	19927	20194
P30101	Protein disulfide-isomerase A3	PDIA3	sp|P30101|PDIA3_HUMAN Protein disulfide-isomerase A3 OS=Homo sapiens OX=9606 GN=PDIA3 PE=1 SV=4	15513	17995	1	1	1	1	1870.4	2227.2	3063	1	5274.3	5206.6	6504.8	6997.2	5403.8	5972.5	2020.3	1	2840.6	1	2316.5	1173.9	8714.4	7317.1	12671	13753	1	529.47	1779.8	2166.4
P30153	Serine/threonine-protein phosphatase 2A 65 kDa regulatory subunit A alpha isoform	PPP2R1A	sp|P30153|2AAA_HUMAN Serine/threonine-protein phosphatase 2A 65 kDa regulatory subunit A alpha isoform OS=Homo sapiens OX=9606 GN=PPP2R1A PE=1 SV=4	9193.6	17354	1269.1	1	1	1	10713	8743.9	19042	15257	17220	18927	18352	20919	14982	18622	15749	16029	10659	9432.4	16665	14382	14006	18119	19187	22314	7898.2	9820.1	6764.3	10264
P30566-2;P30566	Adenylosuccinate lyase	ADSL	sp|P30566-2|PUR8_HUMAN Isoform 2 of Adenylosuccinate lyase OS=Homo sapiens OX=9606 GN=ADSL;sp|P30566|PUR8_HUMAN Adenylosuccinate lyase OS=Homo sapiens OX=9606 GN=ADSL PE=1 SV=2	1	1	1	1	1	1	1	1	4258.5	2165.1	4468.8	1	1	4890.4	1	1	1749.8	1	1	1	1	1516.9	1	3331.3	1	1	1	1	1	1
P30876	DNA-directed RNA polymerase II subunit RPB2	POLR2B	sp|P30876|RPB2_HUMAN DNA-directed RNA polymerase II subunit RPB2 OS=Homo sapiens OX=9606 GN=POLR2B PE=1 SV=1	1	1	1	1	1	1	1	1116.2	1	1	664.71	1	2892.4	1	1141.6	1	1	1	1	1	1380.1	2134.6	1	1	1	1	1	1	1	1
P31153;P31153-2;Q00266	S-adenosylmethionine synthase isoform type-2	MAT2A	sp|P31153|METK2_HUMAN S-adenosylmethionine synthase isoform type-2 OS=Homo sapiens OX=9606 GN=MAT2A PE=1 SV=1;sp|P31153-2|METK2_HUMAN Isoform 2 of S-adenosylmethionine synthase isoform type-2 OS=Homo sapiens OX=9606 GN=MAT2A	42612	36898	42942	46034	45533	42332	29262	31087	22949	24660	26658	27532	27097	30322	29531	30719	29079	28383	35518	35781	35347	33831	37732	36133	34853	33581	31935	36573	32517	30529
P31689;P31689-2	DnaJ homolog subfamily A member 1	DNAJA1	sp|P31689|DNJA1_HUMAN DnaJ homolog subfamily A member 1 OS=Homo sapiens OX=9606 GN=DNAJA1 PE=1 SV=2;sp|P31689-2|DNJA1_HUMAN Isoform 2 of DnaJ homolog subfamily A member 1 OS=Homo sapiens OX=9606 GN=DNAJA1	5838.3	3319.2	1673.7	3421.8	1967.2	2411.6	22505	26609	25630	25145	25869	26542	26030	23706	18157	10504	20824	17003	10142	20089	16720	17295	17148	18309	12754	13178	9841.4	8400.7	14686	15734
P31942-3;P31942-2;P31942;P31942-4;P31942-6;P31942-5	Heterogeneous nuclear ribonucleoprotein H3	HNRNPH3	sp|P31942-3|HNRH3_HUMAN Isoform 3 of Heterogeneous nuclear ribonucleoprotein H3 OS=Homo sapiens OX=9606 GN=HNRNPH3;sp|P31942-2|HNRH3_HUMAN Isoform 2 of Heterogeneous nuclear ribonucleoprotein H3 OS=Homo sapiens OX=9606 GN=HNRNPH3;sp|P31942|HNRH3_HUMAN Hete	1	1	1	1	1	1	1	1	1	1	1	1	2098.5	2715.2	2709.8	1	1	1	1	1	10327	17827	1	1	1	3384.3	1	1	4477.4	2963.4
P31943;P55795	Heterogeneous nuclear ribonucleoprotein H;Heterogeneous nuclear ribonucleoprotein H, N-terminally processed	HNRNPH1	sp|P31943|HNRH1_HUMAN Heterogeneous nuclear ribonucleoprotein H OS=Homo sapiens OX=9606 GN=HNRNPH1 PE=1 SV=4	73745	68087	65528	75522	58006	63845	59009	59979	49827	51904	49508	52595	80285	82156	70678	68601	76823	73594	71015	65881	89226	84603	75914	73950	78443	80406	61221	61088	85671	87656
P31946	14-3-3 protein beta/alpha;14-3-3 protein beta/alpha, N-terminally processed	YWHAB	sp|P31946|1433B_HUMAN 14-3-3 protein beta/alpha OS=Homo sapiens OX=9606 GN=YWHAB PE=1 SV=3	2476.2	3680.3	1	1	1	1	2022.1	2180.9	2704	3172.2	3298.1	2870.8	2534.3	2682.2	1607.2	1128.4	1476.6	1	37324	34571	21870	24773	32708	32323	3610.2	3473.1	1	1	1	1
P31946-2	14-3-3 protein beta/alpha;14-3-3 protein beta/alpha, N-terminally processed	YWHAB	sp|P31946-2|1433B_HUMAN Isoform Short of 14-3-3 protein beta/alpha OS=Homo sapiens OX=9606 GN=YWHAB	1	1	1	1	1	1	1238.5	1398.5	1253.8	1342.1	1402.5	1221.2	1724.5	1555.5	1088.6	1025.1	993.37	1	38463	27625	18853	21657	25369	25533	1	1	1	1	1	1
P31947-2;P31947	14-3-3 protein sigma	SFN	sp|P31947-2|1433S_HUMAN Isoform 2 of 14-3-3 protein sigma OS=Homo sapiens OX=9606 GN=SFN;sp|P31947|1433S_HUMAN 14-3-3 protein sigma OS=Homo sapiens OX=9606 GN=SFN PE=1 SV=1	1	1	1	1	1	1	13712	13172	1	1	13368	11156	8483.8	13482	9730.4	10448	1	12034	74905	58083	40998	37704	52956	56618	10752	13783	1	1	1	1
P31948-2;P31948;P31948-3	Stress-induced-phosphoprotein 1	STIP1	sp|P31948-2|STIP1_HUMAN Isoform 2 of Stress-induced-phosphoprotein 1 OS=Homo sapiens OX=9606 GN=STIP1;sp|P31948|STIP1_HUMAN Stress-induced-phosphoprotein 1 OS=Homo sapiens OX=9606 GN=STIP1 PE=1 SV=1;sp|P31948-3|STIP1_HUMAN Isoform 3 of Stress-induced-phosp	20313	18895	1	1	1	1	1	1	5202.1	7953.5	7608.2	7559.4	7902.4	8666.2	1548.8	5966.4	1	4960	1	1	3963.4	2627.9	7482.4	9080	11487	9295	1	1	1	1
P32119;P32119-2	Peroxiredoxin-2	PRDX2	sp|P32119|PRDX2_HUMAN Peroxiredoxin-2 OS=Homo sapiens OX=9606 GN=PRDX2 PE=1 SV=5	13398	12625	1	1	1	1	1	1715.7	1722.8	1675	4678	2748.2	5479.8	4516.7	1	1	1493.2	1	1	851.68	2068	2030.9	7740.4	5748.9	10520	11466	1	1	1268.6	1
P32969	60S ribosomal protein L9	RPL9	sp|P32969|RL9_HUMAN 60S ribosomal protein L9 OS=Homo sapiens OX=9606 GN=RPL9 PE=1 SV=1	23169	28450	20870	24685	19439	16239	36527	34669	33428	34346	45100	45180	40572	41364	34028	28231	37804	43005	15493	33803	44611	39554	37566	37958	34697	37158	29386	27811	31866	34949
P33316-2;P33316	Deoxyuridine 5-triphosphate nucleotidohydrolase, mitochondrial	DUT	sp|P33316-2|DUT_HUMAN Isoform 2 of Deoxyuridine 5-triphosphate nucleotidohydrolase, mitochondrial OS=Homo sapiens OX=9606 GN=DUT;sp|P33316|DUT_HUMAN Deoxyuridine 5-triphosphate nucleotidohydrolase, mitochondrial OS=Homo sapiens OX=9606 GN=DUT PE=1 SV=4	11524	5868.7	1	4111.4	1	1	1	1	1	767	4945.1	4868.2	5407.2	4627.2	1	11542	1	3942.1	7209.3	7649.9	9047.4	7640.7	10344	8959.5	7624.7	10785	6848.1	4381.6	8060.3	8416.5
P33992	DNA replication licensing factor MCM5	MCM5	sp|P33992|MCM5_HUMAN DNA replication licensing factor MCM5 OS=Homo sapiens OX=9606 GN=MCM5 PE=1 SV=5	742.51	1	1	1	1	1	1	1	1	1	1	1	1	1	1	1	1	1	1	1	2713.7	1	1	1	1	1	1	1	1	1
P33993-2;P33993;P33993-3	DNA replication licensing factor MCM7	MCM7	sp|P33993-2|MCM7_HUMAN Isoform 2 of DNA replication licensing factor MCM7 OS=Homo sapiens OX=9606 GN=MCM7;sp|P33993|MCM7_HUMAN DNA replication licensing factor MCM7 OS=Homo sapiens OX=9606 GN=MCM7 PE=1 SV=4	1	1	1	1	1	1	1	1	1046.9	1126.5	1	1104.7	970.01	1	1	1	1	1	1	1	6043.5	7441	1215.6	1	2379.3	1	1	1	1	933.61
P34897-3;P34897	Serine hydroxymethyltransferase, mitochondrial	SHMT2	sp|P34897-3|GLYM_HUMAN Isoform 3 of Serine hydroxymethyltransferase, mitochondrial OS=Homo sapiens OX=9606 GN=SHMT2;sp|P34897|GLYM_HUMAN Serine hydroxymethyltransferase, mitochondrial OS=Homo sapiens OX=9606 GN=SHMT2 PE=1 SV=3	3996.6	4014.1	1	1	1	1	1	1	1	1	1	1	1	1	1	1	1	1	1	1	1	1	3690.1	1	3958.4	2631.2	1	1	1	1
P34932;P34932-2	Heat shock 70 kDa protein 4	HSPA4	sp|P34932|HSP74_HUMAN Heat shock 70 kDa protein 4 OS=Homo sapiens OX=9606 GN=HSPA4 PE=1 SV=4;sp|P34932-2|HSP74_HUMAN Isoform 2 of Heat shock 70 kDa protein 4 OS=Homo sapiens OX=9606 GN=HSPA4	6467.8	6965.6	1	1	1	1	1	1	2326.7	1	3263.6	1	4064.1	3076.4	1	1	1	1	1	1	3124.4	2878.1	4664.3	3469.1	5746.2	6958.7	1	1	1	1
P35030-5;P35030-3;P35030-2;P35030-4;P35030	Trypsin-3	PRSS3	sp|P35030-5|TRY3_HUMAN Isoform 5 of Trypsin-3 OS=Homo sapiens OX=9606 GN=PRSS3;sp|P35030-3|TRY3_HUMAN Isoform 3 of Trypsin-3 OS=Homo sapiens OX=9606 GN=PRSS3;sp|P35030-2|TRY3_HUMAN Isoform 2 of Trypsin-3 OS=Homo sapiens OX=9606 GN=PRSS3;sp|P35030-4|TRY3_HU	22316	20947	1	10605	1	1	5572.4	6771.2	16579	11546	18720	16631	17205	18102	19784	7519.7	3890.6	10203	1	10438	13708	12916	12955	10628	8085.2	11116	16862	23913	15801	19670
P35052;P35052-2	Glypican-1;Secreted glypican-1	GPC1	sp|P35052|GPC1_HUMAN Glypican-1 OS=Homo sapiens OX=9606 GN=GPC1 PE=1 SV=2;sp|P35052-2|GPC1_HUMAN Isoform 2 of Glypican-1 OS=Homo sapiens OX=9606 GN=GPC1	1	1	1	1	1	1	1	1	9647.4	4667.8	4674.4	7400	8577.8	10719	3524.3	4090.5	3198.2	4542.7	1593.6	1	1	1830.9	2855.3	2137	2849	2326.9	3320.9	2788.8	1	1
P35080-2;P35080	Profilin-2	PFN2	sp|P35080-2|PROF2_HUMAN Isoform IIb of Profilin-2 OS=Homo sapiens OX=9606 GN=PFN2;sp|P35080|PROF2_HUMAN Profilin-2 OS=Homo sapiens OX=9606 GN=PFN2 PE=1 SV=3	64027	48017	1	35411	1	1	24446	34343	18384	19063	33274	35107	31849	35399	27212	1	22490	17301	1	20778	35457	22419	41948	26566	31204	22167	26874	40564	24360	18454
P35221-2;P35221;P35221-3	Catenin alpha-1	CTNNA1	sp|P35221-2|CTNA1_HUMAN Isoform 2 of Catenin alpha-1 OS=Homo sapiens OX=9606 GN=CTNNA1;sp|P35221|CTNA1_HUMAN Catenin alpha-1 OS=Homo sapiens OX=9606 GN=CTNNA1 PE=1 SV=1;sp|P35221-3|CTNA1_HUMAN Isoform 3 of Catenin alpha-1 OS=Homo sapiens OX=9606 GN=CTNNA1	1	1	1	1	1	1	5505.4	5932.2	7667.9	6155.3	7385	6718.4	9988.6	10139	7224.3	9157.2	9603.5	7417.4	1	2567.2	4305.6	5759.7	2827.7	3491.1	7032.9	5183.8	2816.5	1	4248.9	5684.2
P35232;P35232-2	Prohibitin	PHB	sp|P35232|PHB_HUMAN Prohibitin OS=Homo sapiens OX=9606 GN=PHB PE=1 SV=1	15173	13370	2530.1	5404.7	1	4550	17581	18295	17854	18671	19097	18513	19923	20932	13257	15826	13516	13826	10944	10552	10633	11118	15603	15973	18538	20366	10179	9823.3	10123	9855.1
P35244	Replication protein A 14 kDa subunit	RPA3	sp|P35244|RFA3_HUMAN Replication protein A 14 kDa subunit OS=Homo sapiens OX=9606 GN=RPA3 PE=1 SV=1	6872.1	5386.6	1	1	1	1	1	1	1954.1	1	2038.3	1	2435.7	1	1	1	1	1	1	1	7639.2	7423.2	3192.2	2233.1	4653.9	5443.9	1	1	1	1
P35268	60S ribosomal protein L22	RPL22	sp|P35268|RL22_HUMAN 60S ribosomal protein L22 OS=Homo sapiens OX=9606 GN=RPL22 PE=1 SV=2	83717	83644	70080	94629	87727	73349	38533	41275	29931	32616	34697	32620	40746	40324	71010	71631	41798	35249	75121	68485	55321	56497	51875	45912	83124	74421	67967	60106	65766	64726
P35269	General transcription factor IIF subunit 1	GTF2F1	sp|P35269|T2FA_HUMAN General transcription factor IIF subunit 1 OS=Homo sapiens OX=9606 GN=GTF2F1 PE=1 SV=2	8102.7	8909.7	1	9506.5	1	6311.3	7772.2	6627.6	5992.9	4775.9	4296.9	4287.3	5031.6	1	15179	16991	1	1	12886	13514	9655.6	10110	6933.3	4287.8	992.84	2272.5	13270	16852	7953.4	8892.4
P35544	Ubiquitin-like protein FUBI	FAU	sp|P35544|UBIM_HUMAN Ubiquitin-like protein FUBI OS=Homo sapiens OX=9606 GN=FAU PE=1 SV=1	30771	29155	34435	36165	46847	42755	41484	33708	27411	28892	15311	18148	19965	22357	28924	1	19101	21765	28286	30501	28839	27003	23661	19514	29443	25944	40082	46271	27907	29089
P35573-2;P35573-3;P35573	Glycogen debranching enzyme;4-alpha-glucanotransferase;Amylo-alpha-1,6-glucosidase	AGL	sp|P35573-2|GDE_HUMAN Isoform 5 of Glycogen debranching enzyme OS=Homo sapiens OX=9606 GN=AGL;sp|P35573-3|GDE_HUMAN Isoform 6 of Glycogen debranching enzyme OS=Homo sapiens OX=9606 GN=AGL;sp|P35573|GDE_HUMAN Glycogen debranching enzyme OS=Homo sapiens OX=9	1	13274	1	1	1	1	1	1	5667.4	4755.4	7728.6	4606.4	6291.7	7150.1	1	2432.3	1	1	1	8736.4	7987.4	7524.4	9429.7	11049	5960.8	6309.6	2624.5	1	3270.6	4223.9
P35579;P35579-2;P35749-4;P35749-3;P35749;P35749-2;Q7Z406;Q7Z406-6;Q7Z406-2	Myosin-9	MYH9	sp|P35579|MYH9_HUMAN Myosin-9 OS=Homo sapiens OX=9606 GN=MYH9 PE=1 SV=4;sp|P35579-2|MYH9_HUMAN Isoform 2 of Myosin-9 OS=Homo sapiens OX=9606 GN=MYH9	1	1994.9	1	1	1	1	2736.2	2328	11222	8564.8	7638.8	6173.5	8794.8	11089	5288.9	4752.4	2492.4	3503.4	1	1	5627.6	6044.1	2970	2837.6	3802.6	5066.5	1	1	483.34	1
P35580;P35580-5;P35580-2;P35580-3;P35580-4	Myosin-10	MYH10	sp|P35580|MYH10_HUMAN Myosin-10 OS=Homo sapiens OX=9606 GN=MYH10 PE=1 SV=3;sp|P35580-5|MYH10_HUMAN Isoform 5 of Myosin-10 OS=Homo sapiens OX=9606 GN=MYH10;sp|P35580-2|MYH10_HUMAN Isoform 2 of Myosin-10 OS=Homo sapiens OX=9606 GN=MYH10;sp|P35580-3|MYH10_HUM	1	1	1	1	1	1	1	1	1	1	1	1	1	1	1	1814.8	1	1	1	1	4118.7	2034.3	1297.9	1	1875.9	1	1	1	1107	1
P35613-3;P35613-4;P35613-2;P35613	Basigin	BSG	sp|P35613-3|BASI_HUMAN Isoform 3 of Basigin OS=Homo sapiens OX=9606 GN=BSG;sp|P35613-4|BASI_HUMAN Isoform 4 of Basigin OS=Homo sapiens OX=9606 GN=BSG;sp|P35613-2|BASI_HUMAN Isoform 2 of Basigin OS=Homo sapiens OX=9606 GN=BSG;sp|P35613|BASI_HUMAN Basigin OS	12279	5450.9	1	7590.5	1	1	62569	60364	79203	74552	57692	59781	55463	56874	26256	27724	38639	41970	12254	18034	18598	19914	22880	23546	26007	26323	20738	24852	16346	12649
P35637-2;P35637	RNA-binding protein FUS	FUS	sp|P35637-2|FUS_HUMAN Isoform Short of RNA-binding protein FUS OS=Homo sapiens OX=9606 GN=FUS;sp|P35637|FUS_HUMAN RNA-binding protein FUS OS=Homo sapiens OX=9606 GN=FUS PE=1 SV=1	33950	35890	9446.8	15853	21278	15397	12531	11868	16909	15824	21141	23830	8825.9	9187.9	18497	17600	13495	16750	10052	11346	14725	14124	9747.7	10296	25310	23093	16521	15381	10132	14457
P35659;P35659-2	Protein DEK	DEK	sp|P35659|DEK_HUMAN Protein DEK OS=Homo sapiens OX=9606 GN=DEK PE=1 SV=1;sp|P35659-2|DEK_HUMAN Isoform 2 of Protein DEK OS=Homo sapiens OX=9606 GN=DEK	60826	56039	86221	90877	90677	90637	76613	76227	48652	47485	34002	34731	25869	25584	45856	48180	56546	51999	80208	69119	51444	54008	43072	43222	47995	47769	91132	92055	70022	64898
P35998;P35998-2	26S protease regulatory subunit 7	PSMC2	sp|P35998|PRS7_HUMAN 26S proteasome regulatory subunit 7 OS=Homo sapiens OX=9606 GN=PSMC2 PE=1 SV=3;sp|P35998-2|PRS7_HUMAN Isoform 2 of 26S proteasome regulatory subunit 7 OS=Homo sapiens OX=9606 GN=PSMC2	3732.2	6322	1	1	1	1	13504	12642	13594	11925	15251	14908	14412	13768	14578	15926	14558	12179	13068	13395	10915	12142	15272	14855	6076.9	12122	6389.8	5025.6	4314.7	9602.2
P36542;P36542-2	ATP synthase subunit gamma, mitochondrial	ATP5C1	sp|P36542|ATPG_HUMAN ATP synthase subunit gamma, mitochondrial OS=Homo sapiens OX=9606 GN=ATP5F1C PE=1 SV=1;sp|P36542-2|ATPG_HUMAN Isoform Heart of ATP synthase subunit gamma, mitochondrial OS=Homo sapiens OX=9606 GN=ATP5F1C	18101	16737	13345	13560	13196	8864.8	43320	44443	51211	48681	41244	40738	34650	35530	33781	27961	37029	40182	30044	33766	31908	29349	29299	30345	26474	24959	29566	28638	25281	24237
P36543;P36543-3;P36543-2;Q96A05	V-type proton ATPase subunit E 1	ATP6V1E1	sp|P36543|VATE1_HUMAN V-type proton ATPase subunit E 1 OS=Homo sapiens OX=9606 GN=ATP6V1E1 PE=1 SV=1;sp|P36543-3|VATE1_HUMAN Isoform 3 of V-type proton ATPase subunit E 1 OS=Homo sapiens OX=9606 GN=ATP6V1E1;sp|P36543-2|VATE1_HUMAN Isoform 2 of V-type proto	1	1	1	1	1	1	43896	46530	43847	49013	61482	52637	35039	27968	19751	21596	22794	26773	1	3260.2	4087.2	3631.8	3945.3	2728.1	11490	10581	12777	7226.7	4087.8	3836.3
P36578	60S ribosomal protein L4	RPL4	sp|P36578|RL4_HUMAN 60S ribosomal protein L4 OS=Homo sapiens OX=9606 GN=RPL4 PE=1 SV=5	34455	31309	24032	27978	19481	18613	32779	34214	29994	30071	41187	43253	34104	35518	32421	29740	34248	34697	26991	28150	39603	38486	30849	29733	29031	30461	21947	20931	30459	32270
P36915;P36915-2	Guanine nucleotide-binding protein-like 1	GNL1	sp|P36915|GNL1_HUMAN Guanine nucleotide-binding protein-like 1 OS=Homo sapiens OX=9606 GN=GNL1 PE=1 SV=2;sp|P36915-2|GNL1_HUMAN Isoform 2 of Guanine nucleotide-binding protein-like 1 OS=Homo sapiens OX=9606 GN=GNL1	1	1	1	1	787.51	1	1	1	1	1	2798.8	1	1742.3	1972.7	3866.6	1	1	1573.6	1	6401.9	5768.5	3787.9	2164.6	2473.6	1	3340.6	5404.8	8903.5	2746.6	2515.6
P37108	Signal recognition particle 14 kDa protein	SRP14	sp|P37108|SRP14_HUMAN Signal recognition particle 14 kDa protein OS=Homo sapiens OX=9606 GN=SRP14 PE=1 SV=2	26619	4300.5	19563	1	15341	15330	15100	16302	18068	18470	24862	22381	19474	19832	23657	25747	22887	25986	32828	28959	28507	27465	24382	25073	36161	34838	33239	34497	29261	29971
P37802;P37802-2	Transgelin-2	TAGLN2	sp|P37802|TAGL2_HUMAN Transgelin-2 OS=Homo sapiens OX=9606 GN=TAGLN2 PE=1 SV=3;sp|P37802-2|TAGL2_HUMAN Isoform 2 of Transgelin-2 OS=Homo sapiens OX=9606 GN=TAGLN2	3666.6	6230.9	1	1	1	1	1	1	1	1	1	2632.1	1	1	1	1	1	1	1	1	1	1	2539.1	3414.9	4953	4006.8	1	1	1	1
P38159;P38159-2;Q96E39;P38159-3;O75526;Q8N7X1	RNA-binding motif protein, X chromosome;RNA-binding motif protein, X chromosome, N-terminally processed;RNA binding motif protein, X-linked-like-1	RBMX;RBMXL1	sp|P38159|RBMX_HUMAN RNA-binding motif protein, X chromosome OS=Homo sapiens OX=9606 GN=RBMX PE=1 SV=3;sp|P38159-2|RBMX_HUMAN Isoform 2 of RNA-binding motif protein, X chromosome OS=Homo sapiens OX=9606 GN=RBMX;sp|Q96E39|RMXL1_HUMAN RNA binding motif prote	3576.4	1	1	5517.1	10789	14966	18955	19810	7077	4568.7	10480	11010	13164	13229	17614	23747	22376	25108	10177	8324.9	114600	106610	11941	8289	25168	26855	11438	9666.7	42654	49377
P38606-2;P38606	V-type proton ATPase catalytic subunit A	ATP6V1A	sp|P38606-2|VATA_HUMAN Isoform 2 of V-type proton ATPase catalytic subunit A OS=Homo sapiens OX=9606 GN=ATP6V1A;sp|P38606|VATA_HUMAN V-type proton ATPase catalytic subunit A OS=Homo sapiens OX=9606 GN=ATP6V1A PE=1 SV=2	1	1	1	1	1	1	56366	57282	62191	59358	79463	78362	46969	44089	25360	20484	26251	30796	1914.8	2438.2	2950.8	3454.7	3618.8	3519.5	8832.5	9227.2	8076.1	6901.2	3890.4	4418.3
P38646	Stress-70 protein, mitochondrial	HSPA9	sp|P38646|GRP75_HUMAN Stress-70 protein, mitochondrial OS=Homo sapiens OX=9606 GN=HSPA9 PE=1 SV=2	23114	19309	5113	10606	2798.8	2244.3	22882	23460	16236	15143	18733	18957	17726	18409	18258	22611	10404	11933	12341	9700.1	16078	14001	11723	13298	22109	23104	10765	9271.4	9410.7	10111
P38919	Eukaryotic initiation factor 4A-III;Eukaryotic initiation factor 4A-III, N-terminally processed	EIF4A3	sp|P38919|IF4A3_HUMAN Eukaryotic initiation factor 4A-III OS=Homo sapiens OX=9606 GN=EIF4A3 PE=1 SV=4	4698	3686.1	1664.9	1	1	4529	8539.4	7998.4	5173.4	5420.6	5269.8	6693.2	5665.8	7185	6611.5	7807.1	6970.5	4910.8	5272.9	4738.2	29785	21928	4797.4	3383.9	7012.6	7527.2	3606.6	2613.5	10326	8583.7
P39019	40S ribosomal protein S19	RPS19	sp|P39019|RS19_HUMAN 40S ribosomal protein S19 OS=Homo sapiens OX=9606 GN=RPS19 PE=1 SV=2	46667	41362	42209	46134	38368	36505	37988	35767	31998	30244	39635	40684	30623	32181	37286	32478	39872	38972	30561	36532	42790	44217	39268	37561	39100	39427	30756	29820	38777	39451
P39023;Q92901	60S ribosomal protein L3	RPL3	sp|P39023|RL3_HUMAN 60S ribosomal protein L3 OS=Homo sapiens OX=9606 GN=RPL3 PE=1 SV=2	17899	19032	1	6997.2	2457.4	3165.2	23910	21429	23273	21833	29508	31263	24364	23683	23150	17966	23920	21116	13756	17227	36831	34156	22445	21694	23090	22006	12641	10909	17466	20846
P40227;P40227-2	T-complex protein 1 subunit zeta	CCT6A	sp|P40227|TCPZ_HUMAN T-complex protein 1 subunit zeta OS=Homo sapiens OX=9606 GN=CCT6A PE=1 SV=3;sp|P40227-2|TCPZ_HUMAN Isoform 2 of T-complex protein 1 subunit zeta OS=Homo sapiens OX=9606 GN=CCT6A	22559	27998	1	7522.2	1	2202	23383	23063	25463	24264	25246	27168	25865	25385	20508	23329	20503	21240	14816	16368	24240	21203	25842	25006	26633	25526	12856	11693	10980	11005
P40429;Q6NVV1	60S ribosomal protein L13a	RPL13A	sp|P40429|RL13A_HUMAN 60S ribosomal protein L13a OS=Homo sapiens OX=9606 GN=RPL13A PE=1 SV=2	16408	18627	14235	13263	8268	8024.6	15796	18918	16810	18032	21685	22574	17978	17260	16865	18574	22588	21251	20020	15394	23237	21998	20274	20715	21199	20890	14461	13374	18289	19695
P40855-5;P40855	Peroxisomal biogenesis factor 19	PEX19	sp|P40855-5|PEX19_HUMAN Isoform 5 of Peroxisomal biogenesis factor 19 OS=Homo sapiens OX=9606 GN=PEX19;sp|P40855|PEX19_HUMAN Peroxisomal biogenesis factor 19 OS=Homo sapiens OX=9606 GN=PEX19 PE=1 SV=1	1	1	1	1	1	1	5252	7403.1	18735	13296	9038.3	1	4410.6	4699	1	1	1	1	1	1	1	1	1	1	1	1	1	1	1	1
P40925-2;P40925;P40925-3	Malate dehydrogenase, cytoplasmic	MDH1	sp|P40925-2|MDHC_HUMAN Isoform 2 of Malate dehydrogenase, cytoplasmic OS=Homo sapiens OX=9606 GN=MDH1;sp|P40925|MDHC_HUMAN Malate dehydrogenase, cytoplasmic OS=Homo sapiens OX=9606 GN=MDH1 PE=1 SV=4;sp|P40925-3|MDHC_HUMAN Isoform 3 of Malate dehydrogenase,	1	1	1	1	1	1	1	1	1	1	1	1	1	1	1	1	1	1	1	1	1	1	1	1	1	1	1	1	1	1
P40937-2;P40937	Replication factor C subunit 5	RFC5	sp|P40937-2|RFC5_HUMAN Isoform 2 of Replication factor C subunit 5 OS=Homo sapiens OX=9606 GN=RFC5;sp|P40937|RFC5_HUMAN Replication factor C subunit 5 OS=Homo sapiens OX=9606 GN=RFC5 PE=1 SV=1	1	1	1	1	1	1	1	3740.3	3755.4	4088.6	3381.1	2942.1	3494.2	3134.8	3379.1	3622.3	3134.5	1	1	2598.7	3362.2	3541.6	2583.3	2946.1	1740	1	1	1	1	2546.3
P40939;P40939-2	Trifunctional enzyme subunit alpha, mitochondrial;Long-chain enoyl-CoA hydratase;Long chain 3-hydroxyacyl-CoA dehydrogenase	HADHA	sp|P40939|ECHA_HUMAN Trifunctional enzyme subunit alpha, mitochondrial OS=Homo sapiens OX=9606 GN=HADHA PE=1 SV=2	1	167.67	1	1	1	1	137340	127980	149830	149320	106360	140550	101250	102220	89587	99474	124210	127920	48911	38665	45984	44615	38543	37096	63241	68439	64751	63996	55067	54312
P41252	Isoleucine--tRNA ligase, cytoplasmic	IARS	sp|P41252|SYIC_HUMAN Isoleucine--tRNA ligase, cytoplasmic OS=Homo sapiens OX=9606 GN=IARS1 PE=1 SV=2	1	6665.5	1	1	1	1	6934.5	8411.4	7941.1	7494.5	8006.5	8688.7	8400.4	9731.9	6492.9	4564.8	7441.4	5805.3	946.76	4049.5	6259.6	5972.7	5408.4	6360.6	7857.6	5697.2	1	2554.3	5163.3	4835.9
P41567;O60739	Eukaryotic translation initiation factor 1;Eukaryotic translation initiation factor 1b	EIF1;EIF1B	sp|P41567|EIF1_HUMAN Eukaryotic translation initiation factor 1 OS=Homo sapiens OX=9606 GN=EIF1 PE=1 SV=1;sp|O60739|EIF1B_HUMAN Eukaryotic translation initiation factor 1b OS=Homo sapiens OX=9606 GN=EIF1B PE=1 SV=2	14386	15530	1	13918	12049	11041	11583	11365	10003	9049.1	11966	9944.6	12642	12699	16282	12144	11857	13519	8006.9	16157	11222	13454	14275	13699	15756	15579	15641	16957	11860	13905
P42167-3;P42167-2;P42167;P42166	Lamina-associated polypeptide 2, isoforms beta/gamma;Thymopoietin;Thymopentin;Lamina-associated polypeptide 2, isoform alpha;Thymopoietin;Thymopentin	TMPO	sp|P42167-3|LAP2B_HUMAN Isoform Zeta of Lamina-associated polypeptide 2, isoforms beta/gamma OS=Homo sapiens OX=9606 GN=TMPO;sp|P42167-2|LAP2B_HUMAN Isoform Gamma of Lamina-associated polypeptide 2, isoforms beta/gamma OS=Homo sapiens OX=9606 GN=TMPO;sp|P4	12428	10992	4671.7	1	1	1	1	7079.1	5150.8	4069.8	7112.3	6450.2	6874.7	9141.4	7217.3	8304.3	6638.7	1	7426.3	7431.4	5342.6	6197.7	10178	10356	9542.7	10287	1	1	6278.5	6425.2
P42285	Superkiller viralicidic activity 2-like 2	SKIV2L2	sp|P42285|MTREX_HUMAN Exosome RNA helicase MTR4 OS=Homo sapiens OX=9606 GN=MTREX PE=1 SV=3	24719	24595	27752	30025	30371	28660	21071	20966	20302	18938	17220	17655	21919	23072	34839	40771	21164	23790	45073	42130	34423	31313	26346	23700	23983	21782	36308	41429	28525	29029
P42345	Serine/threonine-protein kinase mTOR	MTOR	sp|P42345|MTOR_HUMAN Serine/threonine-protein kinase mTOR OS=Homo sapiens OX=9606 GN=MTOR PE=1 SV=1	1	1	1	1	1	1	1	1	3662.7	2968.5	1	1	1	1	1	1	1	1	1	1	1	1	1	1	1	1	1	1	1	1
P42677;Q71UM5	40S ribosomal protein S27;40S ribosomal protein S27-like	RPS27;RPS27L	sp|P42677|RS27_HUMAN 40S ribosomal protein S27 OS=Homo sapiens OX=9606 GN=RPS27 PE=1 SV=3;sp|Q71UM5|RS27L_HUMAN 40S ribosomal protein S27-like OS=Homo sapiens OX=9606 GN=RPS27L PE=1 SV=3	38257	35307	10936	16589	9904.3	13198	13977	17170	21320	23113	27597	29840	28050	28228	31372	38847	22712	23030	30912	23382	32926	29847	29965	27163	27995	25255	14877	19158	20296	22617
P42695	Condensin-2 complex subunit D3	NCAPD3	sp|P42695|CNDD3_HUMAN Condensin-2 complex subunit D3 OS=Homo sapiens OX=9606 GN=NCAPD3 PE=1 SV=2	16553	14766	36891	37800	39096	40095	33044	26815	52213	53892	41997	40439	28576	33802	28425	26288	15030	26730	36389	37662	23924	24461	14199	12588	12102	10368	30172	30963	27819	28513
P42766	60S ribosomal protein L35	RPL35	sp|P42766|RL35_HUMAN 60S ribosomal protein L35 OS=Homo sapiens OX=9606 GN=RPL35 PE=1 SV=2	18526	17939	9494.3	11568	8439.5	9310	19550	17732	14488	14053	17650	17224	13202	12259	12360	13218	14783	14164	16013	12299	16247	16096	12728	17212	13265	15390	10388	10363	13396	13731
P43243;P43243-2	Matrin-3	MATR3	sp|P43243|MATR3_HUMAN Matrin-3 OS=Homo sapiens OX=9606 GN=MATR3 PE=1 SV=2	1	1	1	1	1	1	1	1	1	1	1	1	600.74	758.98	648.48	453.83	1	1	1	1	33660	23823	1	1	1612.9	1890.8	1	1	4696.6	4506.9
P43487-2;P43487	Ran-specific GTPase-activating protein	RANBP1	sp|P43487-2|RANG_HUMAN Isoform 2 of Ran-specific GTPase-activating protein OS=Homo sapiens OX=9606 GN=RANBP1;sp|P43487|RANG_HUMAN Ran-specific GTPase-activating protein OS=Homo sapiens OX=9606 GN=RANBP1 PE=1 SV=1	24638	21114	1319.9	3895.2	1	1	16292	17158	20885	21713	19091	20328	16041	18412	10197	14888	12714	12948	8277.6	7927.3	8712.6	8491.6	14431	13889	19000	19285	5371.7	5605.6	3929.2	4519.9
P43686-2;P43686	26S protease regulatory subunit 6B	PSMC4	sp|P43686-2|PRS6B_HUMAN Isoform 2 of 26S proteasome regulatory subunit 6B OS=Homo sapiens OX=9606 GN=PSMC4;sp|P43686|PRS6B_HUMAN 26S proteasome regulatory subunit 6B OS=Homo sapiens OX=9606 GN=PSMC4 PE=1 SV=2	1	1	1	1	1	1	1	2604.9	1	1	1	3014.1	4306.1	3018.5	2927.1	2933.6	1	1	3137	3101	2739.8	2698	1763.3	4334.5	1	1	1	1750.8	2448.4	2432.4
P45880-2;P45880;P45880-1	Voltage-dependent anion-selective channel protein 2	VDAC2	sp|P45880-2|VDAC2_HUMAN Isoform 2 of Voltage-dependent anion-selective channel protein 2 OS=Homo sapiens OX=9606 GN=VDAC2;sp|P45880|VDAC2_HUMAN Voltage-dependent anion-selective channel protein 2 OS=Homo sapiens OX=9606 GN=VDAC2 PE=1 SV=2;sp|P45880-1|VDAC2	7923.4	7431.8	1	1	1	1	10143	9244.3	11771	13294	10389	10145	8630.4	8549.9	6224.5	5421.7	6818.8	6400.4	2136.1	3889.9	5769.3	5475.1	8149.6	7308.6	12185	11485	3018.8	2327.5	3226.6	1911.1
P45973	Chromobox protein homolog 5	CBX5	sp|P45973|CBX5_HUMAN Chromobox protein homolog 5 OS=Homo sapiens OX=9606 GN=CBX5 PE=1 SV=1	10798	11232	13495	19333	24367	23971	19184	20229	15059	14063	20230	22619	10998	11505	17782	12969	14661	13728	18315	22822	22944	22370	12228	10651	15493	15405	24441	22983	18575	20974
P46019	Phosphorylase b kinase regulatory subunit alpha, liver isoform	PHKA2	sp|P46019|KPB2_HUMAN Phosphorylase b kinase regulatory subunit alpha, liver isoform OS=Homo sapiens OX=9606 GN=PHKA2 PE=1 SV=1	479350	448590	432080	458680	356410	352380	276540	277700	249210	240510	306680	320850	336020	330360	335050	335440	333740	341280	287950	304380	307270	316490	327590	328610	258820	265600	305120	331720	366880	363140
P46020;P46020-2;P46020-3	Phosphorylase b kinase regulatory subunit alpha, skeletal muscle isoform	PHKA1	sp|P46020|KPB1_HUMAN Phosphorylase b kinase regulatory subunit alpha, skeletal muscle isoform OS=Homo sapiens OX=9606 GN=PHKA1 PE=1 SV=2;sp|P46020-2|KPB1_HUMAN Isoform 2 of Phosphorylase b kinase regulatory subunit alpha, skeletal muscle isoform OS=Homo sa	100350	93882	85929	87510	65663	66653	52393	53916	49333	49685	60810	62977	64234	64022	61218	60918	62970	59701	65107	59337	56947	57512	64778	67411	51855	54139	55328	60269	66576	64440
P46060	Ran GTPase-activating protein 1	RANGAP1	sp|P46060|RAGP1_HUMAN Ran GTPase-activating protein 1 OS=Homo sapiens OX=9606 GN=RANGAP1 PE=1 SV=1	1	1	1	1	1	1	17464	19684	31151	27536	13796	14785	14170	16857	5897.2	11333	5284.3	8717	1	1	1980.1	2381	1	1	4252.7	5204	1	1	1	1
P46087;P46087-4;P46087-2;P46087-3	Probable 28S rRNA (cytosine(4447)-C(5))-methyltransferase	NOP2	sp|P46087|NOP2_HUMAN Probable 28S rRNA (cytosine(4447)-C(5))-methyltransferase OS=Homo sapiens OX=9606 GN=NOP2 PE=1 SV=2;sp|P46087-4|NOP2_HUMAN Isoform 4 of Probable 28S rRNA (cytosine(4447)-C(5))-methyltransferase OS=Homo sapiens OX=9606 GN=NOP2;sp|P46087	1	1	1	1	1	1	1	1	669.7	1	1	1	1465.8	1611.7	3692.2	1	1	1	1	2160	13843	10293	475.49	1	1	1	1	1	1225.5	1801
P46109	Crk-like protein	CRKL	sp|P46109|CRKL_HUMAN Crk-like protein OS=Homo sapiens OX=9606 GN=CRKL PE=1 SV=1	15324	13585	8533.3	1642.7	15405	21518	12600	12602	12049	11116	14878	14780	11721	13222	9290.5	15618	14455	18292	18252	16600	13088	9839.6	16450	13342	11899	14093	15818	16462	11384	15406
P46776	60S ribosomal protein L27a	RPL27A	sp|P46776|RL27A_HUMAN 60S ribosomal protein L27a OS=Homo sapiens OX=9606 GN=RPL27A PE=1 SV=2	38160	30750	23529	26667	23417	29199	37792	41613	31666	33508	45686	42963	38310	36885	33392	41519	40864	39732	41989	32184	41448	39222	38647	38855	39145	35119	29680	27617	33527	35583
P46777	60S ribosomal protein L5	RPL5	sp|P46777|RL5_HUMAN 60S ribosomal protein L5 OS=Homo sapiens OX=9606 GN=RPL5 PE=1 SV=3	29837	30067	17656	19451	15329	15132	8992.8	9398.6	7129	6014.2	7883.6	7111.3	5049.8	5142.2	12862	9956.1	8876.6	8984.3	1095.9	7335.1	17965	17109	16112	15850	17182	12707	933.87	4293.7	7840.9	9447
P46778	60S ribosomal protein L21	RPL21	sp|P46778|RL21_HUMAN 60S ribosomal protein L21 OS=Homo sapiens OX=9606 GN=RPL21 PE=1 SV=2	20942	27303	10827	21593	12433	9784	29337	29233	30841	28900	41784	40757	30215	28919	29862	26001	32609	30399	13286	23201	34968	36225	25255	26330	26380	28737	19513	21342	28074	29408
P46779-4;P46779-5;P46779;P46779-2;P46779-3	60S ribosomal protein L28	RPL28	sp|P46779-4|RL28_HUMAN Isoform 4 of 60S ribosomal protein L28 OS=Homo sapiens OX=9606 GN=RPL28;sp|P46779-5|RL28_HUMAN Isoform 5 of 60S ribosomal protein L28 OS=Homo sapiens OX=9606 GN=RPL28;sp|P46779|RL28_HUMAN 60S ribosomal protein L28 OS=Homo sapiens OX=	34779	41818	27986	36043	23142	26471	55343	54493	45203	42468	64328	63283	49992	50526	52444	60931	53580	52143	45301	39027	48450	52056	43250	42177	34078	33632	30369	24992	39900	41920
P46781	40S ribosomal protein S9	RPS9	sp|P46781|RS9_HUMAN 40S ribosomal protein S9 OS=Homo sapiens OX=9606 GN=RPS9 PE=1 SV=3	16339	15359	9896.2	13106	7746.2	7901.3	15148	16089	12466	12715	18142	18389	13989	14673	11366	11798	17032	16329	12598	11995	15514	15534	15391	14793	14770	14970	10798	9900.8	16193	15262
P46782	40S ribosomal protein S5;40S ribosomal protein S5, N-terminally processed	RPS5	sp|P46782|RS5_HUMAN 40S ribosomal protein S5 OS=Homo sapiens OX=9606 GN=RPS5 PE=1 SV=4	26332	58484	50785	43640	20368	20363	24282	26737	45617	40605	57387	54164	45224	49592	39463	40979	43297	41743	44706	43836	61390	59726	55496	49823	49828	43368	32083	37381	39887	39100
P46783;Q9NQ39	40S ribosomal protein S10	RPS10	sp|P46783|RS10_HUMAN 40S ribosomal protein S10 OS=Homo sapiens OX=9606 GN=RPS10 PE=1 SV=1	60774	52426	46525	47961	41277	40341	47358	50164	42854	46153	62970	66056	59010	54202	61463	52601	62033	54143	50074	52164	60947	63414	49930	55789	46490	48626	43695	43396	51949	54492
P46821;P78559;P78559-2	Microtubule-associated protein 1B;MAP1B heavy chain;MAP1 light chain LC1	MAP1B	sp|P46821|MAP1B_HUMAN Microtubule-associated protein 1B OS=Homo sapiens OX=9606 GN=MAP1B PE=1 SV=2	17159	16152	8526	14986	6714.1	11437	1537.9	3816.4	2871	3980.1	5272.3	4824.3	11852	11672	11101	14265	6912.9	6434.8	12153	17853	14919	14924	15634	17470	6418.9	6520.1	6465.1	5021.6	10992	12758
P47756-2;P47756	F-actin-capping protein subunit beta	CAPZB	sp|P47756-2|CAPZB_HUMAN Isoform 2 of F-actin-capping protein subunit beta OS=Homo sapiens OX=9606 GN=CAPZB;sp|P47756|CAPZB_HUMAN F-actin-capping protein subunit beta OS=Homo sapiens OX=9606 GN=CAPZB PE=1 SV=4	6793.6	6285.8	1	1	1	1	2547.4	2568.1	3657.5	5030.6	4205.7	3941.4	6543.3	5795.3	4880.2	5614.6	5217.9	4404.1	4087	1	4376.5	4392.1	6100.8	5967.2	7479	6177.8	1	1	4144.5	4309.8
P47813;O14602	Eukaryotic translation initiation factor 1A, X-chromosomal;Eukaryotic translation initiation factor 1A, Y-chromosomal	EIF1AX;EIF1AY	sp|P47813|IF1AX_HUMAN Eukaryotic translation initiation factor 1A, X-chromosomal OS=Homo sapiens OX=9606 GN=EIF1AX PE=1 SV=2;sp|O14602|IF1AY_HUMAN Eukaryotic translation initiation factor 1A, Y-chromosomal OS=Homo sapiens OX=9606 GN=EIF1AY PE=1 SV=4	198170	201740	218920	217420	243900	255350	193920	198210	160970	159830	147030	151720	171790	170560	242300	242380	192860	179310	257580	240230	196030	204120	192620	193810	219200	212600	256930	275130	217660	205700
P47914	60S ribosomal protein L29	RPL29	sp|P47914|RL29_HUMAN 60S ribosomal protein L29 OS=Homo sapiens OX=9606 GN=RPL29 PE=1 SV=2	20308	17780	8502.1	17340	1	1	27229	22041	19264	18545	27002	28524	27973	25909	23243	24103	32854	23774	39920	21294	24850	27732	22906	26048	20350	22141	21177	16512	27637	27100
P48047	ATP synthase subunit O, mitochondrial	ATP5O	sp|P48047|ATPO_HUMAN ATP synthase subunit O, mitochondrial OS=Homo sapiens OX=9606 GN=ATP5PO PE=1 SV=1	1	3581.1	1	1	1	1	1	1	6754.1	5501.7	7634.5	6427.6	7689.3	7123.1	4001.4	3896.9	1	1	1	1	4728.9	4930.1	3537.6	4320.7	8034.5	4694.1	3352.6	3537.9	1	3607.6
P48507;P48507-2	Glutamate--cysteine ligase regulatory subunit	GCLM	sp|P48507|GSH0_HUMAN Glutamate--cysteine ligase regulatory subunit OS=Homo sapiens OX=9606 GN=GCLM PE=1 SV=1;sp|P48507-2|GSH0_HUMAN Isoform 2 of Glutamate--cysteine ligase regulatory subunit OS=Homo sapiens OX=9606 GN=GCLM	1	2122.4	1	1	1	1	1	1	1	1	1	1	3050	3911.5	1696.7	1549.9	1	1	1	2107	1	1	1	2905.7	1659.4	1	1	1	1	1727
P48643;P48643-2	T-complex protein 1 subunit epsilon	CCT5	sp|P48643|TCPE_HUMAN T-complex protein 1 subunit epsilon OS=Homo sapiens OX=9606 GN=CCT5 PE=1 SV=1;sp|P48643-2|TCPE_HUMAN Isoform 2 of T-complex protein 1 subunit epsilon OS=Homo sapiens OX=9606 GN=CCT5	30073	30799	8727.6	11383	2104.9	1	27452	26510	33838	35855	37270	39639	34822	34081	25693	20675	21438	25830	19786	23865	28289	28799	32495	31762	34062	35924	19997	19787	19038	20416
P49006	MARCKS-related protein	MARCKSL1	sp|P49006|MRP_HUMAN MARCKS-related protein OS=Homo sapiens OX=9606 GN=MARCKSL1 PE=1 SV=2	1	1	1	1	1	1	1	1	1	3158.2	1	5710.9	7253.8	10565	7802.4	8655.5	6838	5458.4	1	1	4498.1	3131.5	6631.7	10238	7477.2	7783	1	1	1	1651
P49207	60S ribosomal protein L34	RPL34	sp|P49207|RL34_HUMAN 60S ribosomal protein L34 OS=Homo sapiens OX=9606 GN=RPL34 PE=1 SV=3	15524	15211	8022.8	13536	8531.4	10503	22560	22517	15893	16281	20236	22839	18234	16750	19470	20248	24621	20287	19387	15669	22348	21446	18763	18265	16803	16130	13373	12061	19852	18230
P49321-2;P49321-4;P49321;P49321-3	Nuclear autoantigenic sperm protein	NASP	sp|P49321-2|NASP_HUMAN Isoform 2 of Nuclear autoantigenic sperm protein OS=Homo sapiens OX=9606 GN=NASP;sp|P49321-4|NASP_HUMAN Isoform 4 of Nuclear autoantigenic sperm protein OS=Homo sapiens OX=9606 GN=NASP;sp|P49321|NASP_HUMAN Nuclear autoantigenic sperm	10838	9552.1	1	4182.5	1	1230.1	1	3468.5	1	2377.6	4950.4	5158.7	4811.2	4936	4081.2	1	3380.8	2631.1	1	3594	4725.9	4975	6594.7	6824.1	6554.9	6385.8	1859.6	1726.6	1	2962
P49327	Fatty acid synthase;[Acyl-carrier-protein] S-acetyltransferase;[Acyl-carrier-protein] S-malonyltransferase;3-oxoacyl-[acyl-carrier-protein] synthase;3-oxoacyl-[acyl-carrier-protein] reductase;3-hydroxyacyl-[acyl-carrier-protein] dehydratase;Enoyl-[acyl-carrier-protein] reductase;Oleoyl-[acyl-carrier-protein] hydrolase	FASN	sp|P49327|FAS_HUMAN Fatty acid synthase OS=Homo sapiens OX=9606 GN=FASN PE=1 SV=3	17710	19832	1	1058.4	1	1	1876.2	2619.4	10119	8266.2	10282	8679.2	12215	12112	7856.3	9321.2	5252.2	6711.8	2079.6	4848.9	7527.1	9134.1	11341	8698.8	12801	15709	1063.1	1	1	1
P49354;P49354-2	Protein farnesyltransferase/geranylgeranyltransferase type-1 subunit alpha	FNTA	sp|P49354|FNTA_HUMAN Protein farnesyltransferase/geranylgeranyltransferase type-1 subunit alpha OS=Homo sapiens OX=9606 GN=FNTA PE=1 SV=1;sp|P49354-2|FNTA_HUMAN Isoform 2 of Protein farnesyltransferase/geranylgeranyltransferase type-1 subunit alpha OS=Homo	1	1	1	1	1	1	2021400	2090600	2603700	2577000	2997000	2940200	2567400	2530300	2275200	2079400	2902900	3021500	1435200	1479400	1348100	1353500	1593200	1620100	2031700	1993200	2034600	1961000	1575600	1586500
P49356;P49356-2	Protein farnesyltransferase subunit beta	FNTB	sp|P49356|FNTB_HUMAN Protein farnesyltransferase subunit beta OS=Homo sapiens OX=9606 GN=FNTB PE=1 SV=1;sp|P49356-2|FNTB_HUMAN Isoform 2 of Protein farnesyltransferase subunit beta OS=Homo sapiens OX=9606 GN=FNTB	1	1	1	1	1	1	2713700	2704700	2505800	2553500	2693100	2798000	2385900	2316400	2225100	2171200	2985100	2993300	1604000	1432100	1263500	1284900	1479300	1486400	1874200	1842300	1938200	1906100	1639200	1558500
P49368;P49368-2	T-complex protein 1 subunit gamma	CCT3	sp|P49368|TCPG_HUMAN T-complex protein 1 subunit gamma OS=Homo sapiens OX=9606 GN=CCT3 PE=1 SV=4;sp|P49368-2|TCPG_HUMAN Isoform 2 of T-complex protein 1 subunit gamma OS=Homo sapiens OX=9606 GN=CCT3	42686	44529	2233.5	7482.5	1	3055.6	23878	21125	34135	35177	37278	35568	36171	36318	20932	21243	19237	21832	16742	18230	30387	27499	27931	29123	34793	35001	11425	7163.7	8363.2	10737
P49411	Elongation factor Tu, mitochondrial	TUFM	sp|P49411|EFTU_HUMAN Elongation factor Tu, mitochondrial OS=Homo sapiens OX=9606 GN=TUFM PE=1 SV=2	15762	12506	1	1	1	1	1	1	1	1166.3	3475.1	2630.7	2418.6	3037.2	1889.1	1811.6	1	1335	1	1673.2	2786.9	3223	9248.4	6417.2	9607	8907.6	1	1	1	909.05
P49458;P49458-2	Signal recognition particle 9 kDa protein	SRP9	sp|P49458|SRP09_HUMAN Signal recognition particle 9 kDa protein OS=Homo sapiens OX=9606 GN=SRP9 PE=1 SV=2;sp|P49458-2|SRP09_HUMAN Isoform 2 of Signal recognition particle 9 kDa protein OS=Homo sapiens OX=9606 GN=SRP9	35703	32231	18668	23376	21120	24610	24817	26500	21973	21301	11443	23296	17206	17074	28175	33594	25153	29157	35981	30791	25917	25729	27969	26823	40536	46290	37613	36268	34635	32307
P49736	DNA replication licensing factor MCM2	MCM2	sp|P49736|MCM2_HUMAN DNA replication licensing factor MCM2 OS=Homo sapiens OX=9606 GN=MCM2 PE=1 SV=4	1	1	1	1	1	1	1	1	1	1	1	1	1	1565.6	1	1	1	1	1	1	6286.9	6500.6	1	1474	1671.7	1910.7	1	1	1	1
P49756;P49756-2;P49756-3	RNA-binding protein 25	RBM25	sp|P49756|RBM25_HUMAN RNA-binding protein 25 OS=Homo sapiens OX=9606 GN=RBM25 PE=1 SV=3;sp|P49756-2|RBM25_HUMAN Isoform 2 of RNA-binding protein 25 OS=Homo sapiens OX=9606 GN=RBM25;sp|P49756-3|RBM25_HUMAN Isoform 3 of RNA-binding protein 25 OS=Homo sapiens	1	1	1	1	1	1	1	1608.9	1	1	1	586.49	2414.2	1	3655.2	1	1	1	1	1905.4	2392.6	4251.6	1636	1	1	1	1	1	1	1
P49770	Translation initiation factor eIF-2B subunit beta	EIF2B2	sp|P49770|EI2BB_HUMAN Translation initiation factor eIF-2B subunit beta OS=Homo sapiens OX=9606 GN=EIF2B2 PE=1 SV=3	1	1	1	1	1	1	31506	23474	54786	52238	22144	31188	13822	13362	4703.5	5207	4951.9	4824.4	1	1	1	1	1	232.06	1	1	1	1	1	1
P49773	Histidine triad nucleotide-binding protein 1	HINT1	sp|P49773|HINT1_HUMAN Histidine triad nucleotide-binding protein 1 OS=Homo sapiens OX=9606 GN=HINT1 PE=1 SV=2	1	6629	1	1	1	1	1	1	1509.7	1283.7	2778	4118.9	4127.2	1798.9	1	1	1	1	1	1	1363.9	1	1	1871.3	2109.1	2307.3	1	1	1	1
P49792;Q99666;O14715;P0DJD0;P0DJD1;Q99666-2	E3 SUMO-protein ligase RanBP2	RANBP2	sp|P49792|RBP2_HUMAN E3 SUMO-protein ligase RanBP2 OS=Homo sapiens OX=9606 GN=RANBP2 PE=1 SV=2	697.07	1	1	1	1	1	11747	14756	26527	18775	5484.6	5918.9	7962.7	9463.4	2957.4	2035.8	1565.1	1231.1	1	1	1	338.12	1	1	1	1	1	1	1	1
P49915-2;P49915	GMP synthase [glutamine-hydrolyzing]	GMPS	sp|P49915-2|GUAA_HUMAN Isoform 2 of GMP synthase [glutamine-hydrolyzing] OS=Homo sapiens OX=9606 GN=GMPS;sp|P49915|GUAA_HUMAN GMP synthase [glutamine-hydrolyzing] OS=Homo sapiens OX=9606 GN=GMPS PE=1 SV=1	5863.1	5261.3	1	1	1	1	1	1	2683.4	1	3101.5	1	2989.2	2412.2	2839	1	1	1	1	1509	3620.2	1953.5	2499.1	4430.4	1	2594.9	3201.3	1	1	1
P50402	Emerin	EMD	sp|P50402|EMD_HUMAN Emerin OS=Homo sapiens OX=9606 GN=EMD PE=1 SV=1	5928.6	5942	5022.9	6639.6	4722.6	4256.4	58387	62949	57788	59080	43766	46763	45615	45524	39288	35741	47811	41508	38073	35425	31872	32035	29453	30713	18058	18405	21484	23066	21721	21351
P50454	Serpin H1	SERPINH1	sp|P50454|SERPH_HUMAN Serpin H1 OS=Homo sapiens OX=9606 GN=SERPINH1 PE=1 SV=2	6410.9	6125.3	1	1	1	1	1	4543.1	5111	3491.9	4695.4	5384.6	5086.9	6389.8	3697.4	7302.4	4089	5399.1	1	3126	4835.8	3273.2	4901.9	3904.8	3952.2	3800	1	1	2951.4	4890.3
P50502;Q8IZP2;Q8NFI4	Hsc70-interacting protein;Putative protein FAM10A4	ST13;ST13P4	sp|P50502|F10A1_HUMAN Hsc70-interacting protein OS=Homo sapiens OX=9606 GN=ST13 PE=1 SV=2;sp|Q8IZP2|ST134_HUMAN Putative protein FAM10A4 OS=Homo sapiens OX=9606 GN=ST13P4 PE=5 SV=1	6258.8	4383.7	1	1	1	1	3049.3	1279.3	3164.3	1	1	4359.6	2924.4	5896.1	1	3894.7	1	1	1	1	1	1	3081.2	1	7664	3730.5	1	1	1	1
P50750;P50750-2	Cyclin-dependent kinase 9	CDK9	sp|P50750|CDK9_HUMAN Cyclin-dependent kinase 9 OS=Homo sapiens OX=9606 GN=CDK9 PE=1 SV=3;sp|P50750-2|CDK9_HUMAN Isoform 2 of Cyclin-dependent kinase 9 OS=Homo sapiens OX=9606 GN=CDK9	1	1	1	1	1	1	1	1	1	1	1	1	1	1	1	1	1	1	1	1597.8	1092.3	1218.7	1	1	1	1	1	1	1	1
P50914	60S ribosomal protein L14	RPL14	sp|P50914|RL14_HUMAN 60S ribosomal protein L14 OS=Homo sapiens OX=9606 GN=RPL14 PE=1 SV=4	83170	76786	62285	67772	53258	52941	62607	75874	75659	77495	92349	96702	91091	99971	82141	83223	92748	94995	70442	69457	102920	85558	93669	97490	92119	95266	53710	71983	86770	70785
P50990;P50990-2;P50990-3	T-complex protein 1 subunit theta	CCT8	sp|P50990|TCPQ_HUMAN T-complex protein 1 subunit theta OS=Homo sapiens OX=9606 GN=CCT8 PE=1 SV=4;sp|P50990-2|TCPQ_HUMAN Isoform 2 of T-complex protein 1 subunit theta OS=Homo sapiens OX=9606 GN=CCT8;sp|P50990-3|TCPQ_HUMAN Isoform 3 of T-complex protein 1 s	36736	32684	9207.6	9875.5	2366.3	2876	21571	21892	24838	25353	28532	27294	28998	28597	22208	24368	23707	19706	18833	17349	21157	20191	28879	28710	27380	29339	11942	10219	11501	11160
P50991;P50991-2	T-complex protein 1 subunit delta	CCT4	sp|P50991|TCPD_HUMAN T-complex protein 1 subunit delta OS=Homo sapiens OX=9606 GN=CCT4 PE=1 SV=4;sp|P50991-2|TCPD_HUMAN Isoform 2 of T-complex protein 1 subunit delta OS=Homo sapiens OX=9606 GN=CCT4	17837	18059	484.32	653.02	1	1	10076	9335.6	20469	16201	18172	17800	18775	19113	14329	14587	11538	11173	5685.4	8334.7	15028	14476	18793	14917	17247	17429	2838.8	1982.2	3534.1	2228.2
P51148;P51148-2	Ras-related protein Rab-5C	RAB5C	sp|P51148|RAB5C_HUMAN Ras-related protein Rab-5C OS=Homo sapiens OX=9606 GN=RAB5C PE=1 SV=2;sp|P51148-2|RAB5C_HUMAN Isoform 2 of Ras-related protein Rab-5C OS=Homo sapiens OX=9606 GN=RAB5C	7959	2616.3	1	1	1	1	1	1	7771.9	6097.6	6416.3	6188.3	4832.4	5937.6	5185.7	3680.3	1	2664.8	1	2607.6	4906.7	3881.2	1	2151.7	1	1	1	1	1	1
P51149	Ras-related protein Rab-7a	RAB7A	sp|P51149|RAB7A_HUMAN Ras-related protein Rab-7a OS=Homo sapiens OX=9606 GN=RAB7A PE=1 SV=1	1	1	1	1	1	1	13866	9418.5	14327	7950	8329.7	10760	8965.7	8742.4	11106	27283	1	1	1	1	1	1	1	8806.9	1	1	1	1	1	1
P51570;P51570-2	Galactokinase	GALK1	sp|P51570|GALK1_HUMAN Galactokinase OS=Homo sapiens OX=9606 GN=GALK1 PE=1 SV=1;sp|P51570-2|GALK1_HUMAN Isoform 2 of Galactokinase OS=Homo sapiens OX=9606 GN=GALK1	1	1	1	1	1	1	1	4319.8	11776	11383	3160.8	2810.9	6194.4	7543.8	8342.9	6170.1	5779.3	6069.7	1	1	2126.9	1	1111.3	1	1	1	1	1	1	1
P51571	Translocon-associated protein subunit delta	SSR4	sp|P51571|SSRD_HUMAN Translocon-associated protein subunit delta OS=Homo sapiens OX=9606 GN=SSR4 PE=1 SV=1	31876	34140	1	1	1	1	111090	123530	119940	126400	102240	106860	97805	108940	101850	102760	98686	106830	87691	110830	76853	80485	78674	72479	52911	51029	52683	43709	46490	48358
P51648;P51648-2	Fatty aldehyde dehydrogenase	ALDH3A2	sp|P51648|AL3A2_HUMAN Aldehyde dehydrogenase family 3 member A2 OS=Homo sapiens OX=9606 GN=ALDH3A2 PE=1 SV=1;sp|P51648-2|AL3A2_HUMAN Isoform 2 of Aldehyde dehydrogenase family 3 member A2 OS=Homo sapiens OX=9606 GN=ALDH3A2	1	1	1	1	1	1	1	1	6680.5	2115	1	585.28	1	1	1	1	1	1	1	1	1	1	1	1	1	1	1	1	1	1
P51659-3;P51659;P51659-2	Peroxisomal multifunctional enzyme type 2;(3R)-hydroxyacyl-CoA dehydrogenase;Enoyl-CoA hydratase 2	HSD17B4	sp|P51659-3|DHB4_HUMAN Isoform 3 of Peroxisomal multifunctional enzyme type 2 OS=Homo sapiens OX=9606 GN=HSD17B4;sp|P51659|DHB4_HUMAN Peroxisomal multifunctional enzyme type 2 OS=Homo sapiens OX=9606 GN=HSD17B4 PE=1 SV=3;sp|P51659-2|DHB4_HUMAN Isoform 2 of	1	1	1	1	1	1	1	1	1	1	2444.8	1	2124.4	2076.7	1	1	1	1	1	1	2897.8	4396.7	2070.2	1735.9	5889.8	5493.6	1	1	1	1
P51665	26S proteasome non-ATPase regulatory subunit 7	PSMD7	sp|P51665|PSMD7_HUMAN 26S proteasome non-ATPase regulatory subunit 7 OS=Homo sapiens OX=9606 GN=PSMD7 PE=1 SV=2	4709	3846.6	1	1	1	1	1	3372	4668	4488.2	4462.3	5401.5	4294.7	5304.2	1	4110.2	1	1	1	4482.8	3596.1	3876.1	5142.8	5122.3	5249.4	5019.3	1	1	3678.5	3722.3
P51991;P51991-2	Heterogeneous nuclear ribonucleoprotein A3	HNRNPA3	sp|P51991|ROA3_HUMAN Heterogeneous nuclear ribonucleoprotein A3 OS=Homo sapiens OX=9606 GN=HNRNPA3 PE=1 SV=2;sp|P51991-2|ROA3_HUMAN Isoform 2 of Heterogeneous nuclear ribonucleoprotein A3 OS=Homo sapiens OX=9606 GN=HNRNPA3	1	1	1	1	1	1	1813.6	723.08	1	1	1733.9	1625.1	2097.7	5462.8	5013.5	4420.8	4194.6	5537.6	1514.7	1573.8	58667	54986	6338.8	1850.4	10280	9516.2	1	1	13412	18603
P52272-2;P52272	Heterogeneous nuclear ribonucleoprotein M	HNRNPM	sp|P52272-2|HNRPM_HUMAN Isoform 2 of Heterogeneous nuclear ribonucleoprotein M OS=Homo sapiens OX=9606 GN=HNRNPM;sp|P52272|HNRPM_HUMAN Heterogeneous nuclear ribonucleoprotein M OS=Homo sapiens OX=9606 GN=HNRNPM PE=1 SV=3	26655	25943	22804	29378	38480	37629	39727	39580	24816	23935	34522	34240	36965	37336	38250	44262	37483	35891	34023	27669	120850	112490	37913	34344	47098	44723	25454	23399	66436	67685
P52292	Importin subunit alpha-1	KPNA2	sp|P52292|IMA1_HUMAN Importin subunit alpha-1 OS=Homo sapiens OX=9606 GN=KPNA2 PE=1 SV=1	3454.9	4988.6	1	1	1	1	6340.4	5831	8079.1	8032.3	5750.4	7697.1	8300.2	7581.5	7504.3	7838.7	6339.2	1809.4	4362	5825.4	7448.8	8041.4	7182.1	6217.3	7462.7	8603	1	2746	1	3709.6
P52306	Rap1 GTPase-GDP dissociation stimulator 1	RAP1GDS1	sp|P52306|GDS1_HUMAN Rap1 GTPase-GDP dissociation stimulator 1 OS=Homo sapiens OX=9606 GN=RAP1GDS1 PE=1 SV=3	1	1	1	1	1	1	85722	92514	156770	162420	138870	140710	108200	109500	71452	74048	66090	64668	134410	126700	110930	111210	114140	115460	27244	23233	16787	17819	9752.5	13578
P52306-2	Rap1 GTPase-GDP dissociation stimulator 1	RAP1GDS1	sp|P52306-2|GDS1_HUMAN Isoform 2 of Rap1 GTPase-GDP dissociation stimulator 1 OS=Homo sapiens OX=9606 GN=RAP1GDS1	1	1	1	1	1	1	1	1	1737.8	1	1	1	24685	1	1	1	1	1	1	1	6923.7	10908	13337	18451	1	1	1	1	1	1
P52306-4	Rap1 GTPase-GDP dissociation stimulator 1	RAP1GDS1	sp|P52306-4|GDS1_HUMAN Isoform 4 of Rap1 GTPase-GDP dissociation stimulator 1 OS=Homo sapiens OX=9606 GN=RAP1GDS1	1	1	1	1	1	1	1	1	2550.1	6297.3	3872.8	1080.3	840.25	1	1	1915.8	1	1	1	1295.8	2266.5	1070.1	2206.9	1	1	1	1	1	1	1
P52306-5	Rap1 GTPase-GDP dissociation stimulator 1	RAP1GDS1	sp|P52306-5|GDS1_HUMAN Isoform 5 of Rap1 GTPase-GDP dissociation stimulator 1 OS=Homo sapiens OX=9606 GN=RAP1GDS1	1	1	1	1	1	1	55504	52270	44739	45311	41495	42656	33549	31091	32709	38952	32875	24297	69036	49641	44745	46902	36365	37089	1	1	1	10439	1	1
P52565-2;P52565	Rho GDP-dissociation inhibitor 1	ARHGDIA	sp|P52565-2|GDIR1_HUMAN Isoform 2 of Rho GDP-dissociation inhibitor 1 OS=Homo sapiens OX=9606 GN=ARHGDIA;sp|P52565|GDIR1_HUMAN Rho GDP-dissociation inhibitor 1 OS=Homo sapiens OX=9606 GN=ARHGDIA PE=1 SV=3	8429.3	10867	1	1	1	1	1	1	1	1	2594.6	1	2528.4	1597	1	1	1	1	1	1	1206.9	1	3283.8	4682.5	8070.3	5945.7	1	1	1	1
P52597	Heterogeneous nuclear ribonucleoprotein F;Heterogeneous nuclear ribonucleoprotein F, N-terminally processed	HNRNPF	sp|P52597|HNRPF_HUMAN Heterogeneous nuclear ribonucleoprotein F OS=Homo sapiens OX=9606 GN=HNRNPF PE=1 SV=3	40470	18230	38692	36790	26714	25845	43617	31066	44838	41904	42767	48108	59595	62235	56640	56649	52367	50866	57188	50953	54998	62067	52762	53772	46244	53612	28958	45154	49207	46770
P52701-4;P52701-3;P52701;P52701-2	DNA mismatch repair protein Msh6	MSH6	sp|P52701-4|MSH6_HUMAN Isoform 4 of DNA mismatch repair protein Msh6 OS=Homo sapiens OX=9606 GN=MSH6;sp|P52701-3|MSH6_HUMAN Isoform 3 of DNA mismatch repair protein Msh6 OS=Homo sapiens OX=9606 GN=MSH6;sp|P52701|MSH6_HUMAN DNA mismatch repair protein Msh6	1	1	1	1	1	1	3929.7	3887.9	7363.7	6009.1	5923.2	4198.7	3797.2	3724.3	4896	4940.2	1	2862.9	3575.8	3836	6956.9	5820.8	1983.2	3801.6	2513	1	1	1	878.01	1
P52732	Kinesin-like protein KIF11	KIF11	sp|P52732|KIF11_HUMAN Kinesin-like protein KIF11 OS=Homo sapiens OX=9606 GN=KIF11 PE=1 SV=2	244730	244370	306150	322390	280690	279920	143890	148150	106240	105770	133430	137630	187240	186390	213100	207190	244730	232860	252550	254040	227060	231490	269790	279110	255340	251330	274150	275720	314850	300670
P52815	39S ribosomal protein L12, mitochondrial	MRPL12	sp|P52815|RM12_HUMAN 39S ribosomal protein L12, mitochondrial OS=Homo sapiens OX=9606 GN=MRPL12 PE=1 SV=2	20531	19507	17787	19456	14039	18779	8848.2	10411	6555.6	6631.3	8273.9	9975.7	13735	14379	16001	20303	13206	13186	15606	13543	14230	14374	16089	16811	10988	13691	12940	12690	13530	14069
P52907;P47755-2;P47755	F-actin-capping protein subunit alpha-1	CAPZA1	sp|P52907|CAZA1_HUMAN F-actin-capping protein subunit alpha-1 OS=Homo sapiens OX=9606 GN=CAPZA1 PE=1 SV=3	14337	11271	6628.6	9694.3	7472.9	8781.4	13029	12762	9442.2	10849	11798	9676.8	12459	12706	13674	16955	12409	14411	11013	10070	12207	10683	12060	12991	15280	13572	12204	10783	10745	12508
P52926-3;P52926-6;P52926-4;P52926-5;P52926-2;P52926	High mobility group protein HMGI-C	HMGA2	sp|P52926-3|HMGA2_HUMAN Isoform 3 of High mobility group protein HMGI-C OS=Homo sapiens OX=9606 GN=HMGA2;sp|P52926-6|HMGA2_HUMAN Isoform 6 of High mobility group protein HMGI-C OS=Homo sapiens OX=9606 GN=HMGA2;sp|P52926-4|HMGA2_HUMAN Isoform 4 of High mobi	39139	47169	57351	67213	90176	89862	68451	67790	34071	34990	38920	37512	27425	24254	49948	53056	57352	46584	82761	66460	39588	41883	40174	45973	39226	41450	65509	67014	49512	49554
P53007	Tricarboxylate transport protein, mitochondrial	SLC25A1	sp|P53007|TXTP_HUMAN Tricarboxylate transport protein, mitochondrial OS=Homo sapiens OX=9606 GN=SLC25A1 PE=1 SV=2	5666.4	4239.9	1	1	1	1	22682	17152	19400	21150	17776	19119	12143	13059	12432	15762	16798	16710	21067	17476	14840	14005	14165	13001	8906.6	10812	11061	9902.2	11163	11086
P53396-3;P53396-2;P53396	ATP-citrate synthase	ACLY	sp|P53396-3|ACLY_HUMAN Isoform 3 of ATP-citrate synthase OS=Homo sapiens OX=9606 GN=ACLY;sp|P53396-2|ACLY_HUMAN Isoform 2 of ATP-citrate synthase OS=Homo sapiens OX=9606 GN=ACLY;sp|P53396|ACLY_HUMAN ATP-citrate synthase OS=Homo sapiens OX=9606 GN=ACLY PE=1	1	1	1	1	1	1	1	1	1	1	3176.2	4723.1	4853.8	4222.8	2562.8	2816.9	1	1	1	1	3472.5	1	2805.3	2497	2837.4	3312.7	1	1	1	1
P53985;P53985-2	Monocarboxylate transporter 1	SLC16A1	sp|P53985|MOT1_HUMAN Monocarboxylate transporter 1 OS=Homo sapiens OX=9606 GN=SLC16A1 PE=1 SV=3;sp|P53985-2|MOT1_HUMAN Isoform 2 of Monocarboxylate transporter 1 OS=Homo sapiens OX=9606 GN=SLC16A1	5853.3	6563.3	2583.6	2702.5	1648.3	2109.4	41465	44548	38270	39556	30220	31438	30418	28755	23902	18817	31787	25504	12397	19580	13112	13712	15495	17047	11411	11135	14895	15220	13805	13312
P53999	Activated RNA polymerase II transcriptional coactivator p15	SUB1	sp|P53999|TCP4_HUMAN Activated RNA polymerase II transcriptional coactivator p15 OS=Homo sapiens OX=9606 GN=SUB1 PE=1 SV=3	3795000	3642300	5291400	5493900	5067200	4926700	4553500	4500900	3329600	3328600	2999700	2955100	2606100	2550400	4097400	3877100	4349300	4256600	4322800	4804800	3269300	3468100	3604900	3647100	3717500	3773200	5994900	6109400	4647700	4522500
P54105	Methylosome subunit pICln	CLNS1A	sp|P54105|ICLN_HUMAN Methylosome subunit pICln OS=Homo sapiens OX=9606 GN=CLNS1A PE=1 SV=1	486210	464480	549460	550330	506470	579030	143290	129520	86117	86429	110550	117300	136010	133900	150510	196970	143470	133290	380540	313620	321600	312680	344990	333320	268060	263590	304850	319650	423140	416310
P54136-2;P54136	Arginine--tRNA ligase, cytoplasmic	RARS	sp|P54136-2|SYRC_HUMAN Isoform Monomeric of Arginine--tRNA ligase, cytoplasmic OS=Homo sapiens OX=9606 GN=RARS1;sp|P54136|SYRC_HUMAN Arginine--tRNA ligase, cytoplasmic OS=Homo sapiens OX=9606 GN=RARS1 PE=1 SV=2	11589	8167.7	1	1	1	1	3415.2	3984.2	7006.9	5617.1	9642.8	7262.1	9582.4	10575	8299.8	8286.6	8716.9	8355.9	4506.5	5543.7	6981.5	5593.3	9241.4	10593	10254	9797.9	5182.8	5230.9	5984.4	6568.4
P54886-2;P54886	Delta-1-pyrroline-5-carboxylate synthase;Glutamate 5-kinase;Gamma-glutamyl phosphate reductase	ALDH18A1	sp|P54886-2|P5CS_HUMAN Isoform Short of Delta-1-pyrroline-5-carboxylate synthase OS=Homo sapiens OX=9606 GN=ALDH18A1;sp|P54886|P5CS_HUMAN Delta-1-pyrroline-5-carboxylate synthase OS=Homo sapiens OX=9606 GN=ALDH18A1 PE=1 SV=2	1	6192	1	1	1	1	6865.6	4875.9	15437	13204	15710	11325	12548	12133	4415.4	1	6598.9	4506.6	1	8282.1	11359	11546	10322	11818	12015	14021	1	4116.1	7364	8543.4
P55036;P55036-2	26S proteasome non-ATPase regulatory subunit 4	PSMD4	sp|P55036|PSMD4_HUMAN 26S proteasome non-ATPase regulatory subunit 4 OS=Homo sapiens OX=9606 GN=PSMD4 PE=1 SV=1;sp|P55036-2|PSMD4_HUMAN Isoform Rpn10E of 26S proteasome non-ATPase regulatory subunit 4 OS=Homo sapiens OX=9606 GN=PSMD4	18895	17183	10700	13404	10585	9404.6	14905	15642	11928	12830	16120	15562	18071	15756	14246	16851	14947	16387	16023	14224	13773	13956	20200	20584	14379	13159	11418	13483	15998	14080
P55060-4;P55060-3;P55060;P55060-2	Exportin-2	CSE1L	sp|P55060-4|XPO2_HUMAN Isoform 4 of Exportin-2 OS=Homo sapiens OX=9606 GN=CSE1L;sp|P55060-3|XPO2_HUMAN Isoform 3 of Exportin-2 OS=Homo sapiens OX=9606 GN=CSE1L;sp|P55060|XPO2_HUMAN Exportin-2 OS=Homo sapiens OX=9606 GN=CSE1L PE=1 SV=3	7189.4	6362.5	1	1	1	54112	41351	44588	69238	64381	45750	47030	36321	35585	24538	23444	28251	27516	6508.6	11716	10096	8930.9	12016	13354	11087	11280	7085.6	8258.3	5494.8	4917.1
P55072	Transitional endoplasmic reticulum ATPase	VCP	sp|P55072|TERA_HUMAN Transitional endoplasmic reticulum ATPase OS=Homo sapiens OX=9606 GN=VCP PE=1 SV=4	7686.6	10978	1	1	1	1	18820	15813	21016	18912	21617	20090	21308	21048	14476	17723	12901	12943	13550	9644.7	13418	11266	14061	13748	12742	13250	6349	6141.7	6578.6	7050.2
P55081	Microfibrillar-associated protein 1	MFAP1	sp|P55081|MFAP1_HUMAN Microfibrillar-associated protein 1 OS=Homo sapiens OX=9606 GN=MFAP1 PE=1 SV=2	32912	26908	28060	38540	43060	46091	33024	28713	25332	22924	59158	62189	32762	29012	58269	54292	40522	40221	58619	59662	39174	40931	38110	38149	34452	35650	51692	56364	49085	47756
P55084-2;P55084	Trifunctional enzyme subunit beta, mitochondrial;3-ketoacyl-CoA thiolase	HADHB	sp|P55084-2|ECHB_HUMAN Isoform 2 of Trifunctional enzyme subunit beta, mitochondrial OS=Homo sapiens OX=9606 GN=HADHB;sp|P55084|ECHB_HUMAN Trifunctional enzyme subunit beta, mitochondrial OS=Homo sapiens OX=9606 GN=HADHB PE=1 SV=3	1	1	1	1	1	1	63894	67546	69253	67897	63683	63556	45472	46295	40193	42331	55358	52514	17728	16659	18839	19633	16486	16479	27810	27048	28588	28174	25481	24023
P55196-2;P55196-6;P55196-3;P55196-1;P55196;P55196-5	Afadin	MLLT4	sp|P55196-2|AFAD_HUMAN Isoform 1 of Afadin OS=Homo sapiens OX=9606 GN=AFDN;sp|P55196-6|AFAD_HUMAN Isoform 6 of Afadin OS=Homo sapiens OX=9606 GN=AFDN;sp|P55196-3|AFAD_HUMAN Isoform 3 of Afadin OS=Homo sapiens OX=9606 GN=AFDN;sp|P55196-1|AFAD_HUMAN Isoform	1	1	1	1	1	1	1	1	1021.5	842.47	1	1	1096.9	1	451.85	1	1	774.56	15656	13874	11867	12513	14167	14429	1	699.71	1	1	1	1
P55209-2;P55209;P55209-3;Q99733;Q99733-2	Nucleosome assembly protein 1-like 1	NAP1L1	sp|P55209-2|NP1L1_HUMAN Isoform 2 of Nucleosome assembly protein 1-like 1 OS=Homo sapiens OX=9606 GN=NAP1L1;sp|P55209|NP1L1_HUMAN Nucleosome assembly protein 1-like 1 OS=Homo sapiens OX=9606 GN=NAP1L1 PE=1 SV=1;sp|P55209-3|NP1L1_HUMAN Isoform 3 of Nucleoso	25260	19604	8444.1	10001	3009.7	7100.5	50415	49463	62354	62197	48265	49583	33504	32430	30191	35702	33415	33553	32517	32698	38596	40001	33634	32376	29673	33060	17902	16720	17351	16590
P55769	NHP2-like protein 1;NHP2-like protein 1, N-terminally processed	NHP2L1	sp|P55769|NH2L1_HUMAN NHP2-like protein 1 OS=Homo sapiens OX=9606 GN=SNU13 PE=1 SV=3	1	1	1	1	1	1	1	1	1	1	1	1	582.64	1	1	1	1	1	1	1	9272.7	9275.8	1	1	3258	4168.6	1	1	1	1729.6
P55884;P55884-2	Eukaryotic translation initiation factor 3 subunit B	EIF3B	sp|P55884|EIF3B_HUMAN Eukaryotic translation initiation factor 3 subunit B OS=Homo sapiens OX=9606 GN=EIF3B PE=1 SV=3;sp|P55884-2|EIF3B_HUMAN Isoform 2 of Eukaryotic translation initiation factor 3 subunit B OS=Homo sapiens OX=9606 GN=EIF3B	9579.1	10357	1	1	2167	1	1	1	3114.6	3105.1	3338	2237.8	3279.5	3976.6	3402.4	4179.3	1	4022.4	1	3261.1	2633.7	1	3442.3	2561.4	2050.1	3828.7	2028.1	1	3541.2	3455.5
P56134-4;P56134-3;P56134-2;P56134	ATP synthase subunit f, mitochondrial	ATP5J2	sp|P56134-4|ATPK_HUMAN Isoform 4 of ATP synthase subunit f, mitochondrial OS=Homo sapiens OX=9606 GN=ATP5MF;sp|P56134-3|ATPK_HUMAN Isoform 3 of ATP synthase subunit f, mitochondrial OS=Homo sapiens OX=9606 GN=ATP5MF;sp|P56134-2|ATPK_HUMAN Isoform 2 of ATP	1	1	1	1	1	1	1	1	11492	11307	8841.2	6884.3	4179.3	4380.4	2858	2993.3	1	1291.9	1	3185	6198	4626.4	1	2121.7	4291.7	3424.5	1	1	1	1
P56192-2;P56192	Methionine--tRNA ligase, cytoplasmic	MARS	sp|P56192-2|SYMC_HUMAN Isoform 2 of Methionine--tRNA ligase, cytoplasmic OS=Homo sapiens OX=9606 GN=MARS1;sp|P56192|SYMC_HUMAN Methionine--tRNA ligase, cytoplasmic OS=Homo sapiens OX=9606 GN=MARS1 PE=1 SV=2	1	1	1	1	1	1	1	3100.1	4115.9	4434.5	4067.9	4465.4	3333.8	3723.3	3419	8367.2	1	1	2811	2772.1	4303.7	2790.2	4039	1	4511	1	1	3307.2	3207.5	3211.1
P56270-4;P56270-3;P56270;P56270-2	Myc-associated zinc finger protein	MAZ	sp|P56270-4|MAZ_HUMAN Isoform 4 of Myc-associated zinc finger protein OS=Homo sapiens OX=9606 GN=MAZ;sp|P56270-3|MAZ_HUMAN Isoform 3 of Myc-associated zinc finger protein OS=Homo sapiens OX=9606 GN=MAZ;sp|P56270|MAZ_HUMAN Myc-associated zinc finger protein	6886.4	6236	7702.6	10605	7129	6797.2	7747.9	8141.7	6219	7346.3	6208.8	5848.7	5952.6	5829.1	7452.5	5043	4994.3	4270	4799.2	7772.6	6004.5	6322.2	3745.8	4136.2	4223.8	4497.1	5850.3	7541.9	8516.2	7039.3
P57678	Gem-associated protein 4	GEMIN4	sp|P57678|GEMI4_HUMAN Gem-associated protein 4 OS=Homo sapiens OX=9606 GN=GEMIN4 PE=1 SV=2	1	1	1	1	1	1	10380	9357.2	36026	29662	24590	21559	13704	12980	5352.7	3511	6645.4	8491.8	1	1	692.48	916.78	2600.3	1	1	3328	1	1549.9	1	1
P60228	Eukaryotic translation initiation factor 3 subunit E	EIF3E	sp|P60228|EIF3E_HUMAN Eukaryotic translation initiation factor 3 subunit E OS=Homo sapiens OX=9606 GN=EIF3E PE=1 SV=1	9701.8	9626	5903.4	7891.4	10980	9515	4609.4	1	3310.6	1	4715.7	6171.8	4709.3	4781.7	5298.2	4131.1	1	3994.7	1	4096.2	1626.7	3723.7	2804.4	1	2613.6	1066.8	1	1	3726.2	5381.2
P60660;P60660-2;P14649	Myosin light polypeptide 6	MYL6	sp|P60660|MYL6_HUMAN Myosin light polypeptide 6 OS=Homo sapiens OX=9606 GN=MYL6 PE=1 SV=2;sp|P60660-2|MYL6_HUMAN Isoform Smooth muscle of Myosin light polypeptide 6 OS=Homo sapiens OX=9606 GN=MYL6	14072	13639	1	1	1	1	8769.3	7820.8	8241.4	8910.7	7756.7	9279.4	11954	11222	8003.7	10603	8798.5	7551.1	6816.4	5124.4	7833.1	10165	8341.7	8557.7	10203	12128	4745.1	3353	7454.9	6220.6
P60709;P63267-2;Q6S8J3;A5A3E0;Q562R1;P0CG38;P0CG39;Q9BYX7	Actin, cytoplasmic 1;Actin, cytoplasmic 1, N-terminally processed	ACTB	sp|P60709|ACTB_HUMAN Actin, cytoplasmic 1 OS=Homo sapiens OX=9606 GN=ACTB PE=1 SV=1	34442	23904	12215	8365.8	7092.2	9290	47845	50339	38456	47599	35360	33974	56696	65287	41520	59682	37951	44632	43621	39897	75889	65727	47903	41389	97446	105030	50933	42654	63526	58030
P60842;P60842-2;Q14240;Q14240-2	Eukaryotic initiation factor 4A-I;Eukaryotic initiation factor 4A-II;Eukaryotic initiation factor 4A-II, N-terminally processed	EIF4A1;EIF4A2	sp|P60842|IF4A1_HUMAN Eukaryotic initiation factor 4A-I OS=Homo sapiens OX=9606 GN=EIF4A1 PE=1 SV=1;sp|P60842-2|IF4A1_HUMAN Isoform 2 of Eukaryotic initiation factor 4A-I OS=Homo sapiens OX=9606 GN=EIF4A1;sp|Q14240|IF4A2_HUMAN Eukaryotic initiation factor	46499	42643	5791.8	2465.9	2038	2084.4	14377	13125	20770	21012	23690	22485	24967	24211	16153	15998	18593	20254	10563	13802	21850	21260	27853	28722	39994	40229	10531	6852.8	10735	8298.3
P60866;P60866-2	40S ribosomal protein S20	RPS20	sp|P60866|RS20_HUMAN 40S ribosomal protein S20 OS=Homo sapiens OX=9606 GN=RPS20 PE=1 SV=1;sp|P60866-2|RS20_HUMAN Isoform 2 of 40S ribosomal protein S20 OS=Homo sapiens OX=9606 GN=RPS20	40585	35360	33220	40034	37126	34587	34237	34884	28396	27113	35492	36137	32292	31406	31777	30517	39863	36683	30304	29385	36898	38696	35373	35577	32183	33216	24568	27331	35654	33696
P60891;P60891-2	Ribose-phosphate pyrophosphokinase 1	PRPS1	sp|P60891|PRPS1_HUMAN Ribose-phosphate pyrophosphokinase 1 OS=Homo sapiens OX=9606 GN=PRPS1 PE=1 SV=2;sp|P60891-2|PRPS1_HUMAN Isoform 2 of Ribose-phosphate pyrophosphokinase 1 OS=Homo sapiens OX=9606 GN=PRPS1	113490	114420	114110	121910	83811	75543	8673	9152.3	8523.2	7716.2	18560	19431	15420	14933	15573	10739	16933	17841	54823	71120	72455	72151	92509	95740	29621	27282	28303	28667	38106	39075
P60953-1;P60953	Cell division control protein 42 homolog	CDC42	sp|P60953-1|CDC42_HUMAN Isoform 1 of Cell division control protein 42 homolog OS=Homo sapiens OX=9606 GN=CDC42;sp|P60953|CDC42_HUMAN Cell division control protein 42 homolog OS=Homo sapiens OX=9606 GN=CDC42 PE=1 SV=2	1	1	1	1	1	1	1	1	5850.2	4228.9	1	1	2705.6	4033.7	1	1	1	3329.9	1	1	1	1	1	1	1	1	1	1	1	1
P60981;P60981-2	Destrin	DSTN	sp|P60981|DEST_HUMAN Destrin OS=Homo sapiens OX=9606 GN=DSTN PE=1 SV=3;sp|P60981-2|DEST_HUMAN Isoform 2 of Destrin OS=Homo sapiens OX=9606 GN=DSTN	9106.4	8965.5	1	8658.9	6459.4	5265.2	4516.6	5404.7	5632.7	5142.3	7673	6616.3	7352.1	6824.8	6386.2	7935.4	7969.6	1	6480.6	5363	4587.7	5777.2	7590.4	6360.4	7652.9	7684.6	4999	1	6838.6	8342.3
P61026;P62820-3;P51153;Q92930;P61006-2;P61006;P59190-2;P59190	Ras-related protein Rab-10;Ras-related protein Rab-1A;Ras-related protein Rab-13;Ras-related protein Rab-8B;Ras-related protein Rab-8A;Ras-related protein Rab-15	RAB10;RAB1A;RAB13;RAB8B;RAB8A;RAB15	sp|P61026|RAB10_HUMAN Ras-related protein Rab-10 OS=Homo sapiens OX=9606 GN=RAB10 PE=1 SV=1;sp|P62820-3|RAB1A_HUMAN Isoform 3 of Ras-related protein Rab-1A OS=Homo sapiens OX=9606 GN=RAB1A;sp|P51153|RAB13_HUMAN Ras-related protein Rab-13 OS=Homo sapiens OX	8578.6	8396	1	1	1	1	6999	8783.9	15001	16375	10421	10185	8410.8	9132.6	8751.8	9553.8	10179	7054.6	1	3838.7	7146.3	5866.7	7849.5	7259.4	8522	9238	3311.2	1	1	3334.8
P61163	Alpha-centractin	ACTR1A	sp|P61163|ACTZ_HUMAN Alpha-centractin OS=Homo sapiens OX=9606 GN=ACTR1A PE=1 SV=1	4991.8	7222.5	1	1	1	1	4464.6	4171.9	5232.8	4419.9	9443.2	7796.2	10777	12980	2978.6	4485.9	3828.5	1	4043.3	1488	3386.1	2981.6	7700.2	8630.3	10026	9052.4	1	1	4091.5	4148.2
P61224-3;P61224;P61224-2;P62834;A6NIZ1;P61224-4	Ras-related protein Rap-1b;Ras-related protein Rap-1A;Ras-related protein Rap-1b-like protein	RAP1B;RAP1A	sp|P61224-3|RAP1B_HUMAN Isoform 3 of Ras-related protein Rap-1b OS=Homo sapiens OX=9606 GN=RAP1B;sp|P61224|RAP1B_HUMAN Ras-related protein Rap-1b OS=Homo sapiens OX=9606 GN=RAP1B PE=1 SV=1;sp|P61224-2|RAP1B_HUMAN Isoform 2 of Ras-related protein Rap-1b OS=	1	1	1	1	1	1	10387	13508	54625	54018	25553	20562	29325	32749	29417	26199	29676	27794	2103.3	3674.1	8841.2	8087.9	6372.4	6117.7	1374.9	1947.2	1	1	1	1
P61247	40S ribosomal protein S3a	RPS3A	sp|P61247|RS3A_HUMAN 40S ribosomal protein S3a OS=Homo sapiens OX=9606 GN=RPS3A PE=1 SV=2	26909	25587	26690	27261	21927	20911	30999	31495	24055	23204	33096	33802	29558	27811	30594	29075	30638	27579	25907	24923	29196	29408	26812	28388	26388	24891	22731	20991	29005	27032
P61254;Q9UNX3	60S ribosomal protein L26;60S ribosomal protein L26-like 1	RPL26;RPL26L1	sp|P61254|RL26_HUMAN 60S ribosomal protein L26 OS=Homo sapiens OX=9606 GN=RPL26 PE=1 SV=1;sp|Q9UNX3|RL26L_HUMAN 60S ribosomal protein L26-like 1 OS=Homo sapiens OX=9606 GN=RPL26L1 PE=1 SV=1	12999	13730	2986.5	7269.1	4927.7	3250.9	16671	14887	13381	13318	19152	17745	15006	15325	14813	11820	19022	16123	7361.7	13319	18348	18423	14598	14594	12249	12612	6493.6	7977.8	14256	13893
P61289;P61289-3;P61289-2	Proteasome activator complex subunit 3	PSME3	sp|P61289|PSME3_HUMAN Proteasome activator complex subunit 3 OS=Homo sapiens OX=9606 GN=PSME3 PE=1 SV=1;sp|P61289-3|PSME3_HUMAN Isoform 3 of Proteasome activator complex subunit 3 OS=Homo sapiens OX=9606 GN=PSME3;sp|P61289-2|PSME3_HUMAN Isoform 2 of Protea	14386	11761	1	4753.2	10652	13256	6294.1	4758.6	5670.3	5240.3	8341.3	8518.7	8523.3	8244.9	6367.6	7845.2	3533.7	4742.6	5696.1	5852.4	6718.2	6820.8	6536.9	8217.9	7012.6	9136.5	3818.3	3826.4	4018.4	3503.6
P61313;P61313-2	60S ribosomal protein L15	RPL15	sp|P61313|RL15_HUMAN 60S ribosomal protein L15 OS=Homo sapiens OX=9606 GN=RPL15 PE=1 SV=2	34607	33047	25917	31158	14517	16102	36009	38244	34982	34137	46017	47055	37517	36551	34314	35198	43431	39604	38403	32374	49113	48243	37919	37224	38046	37908	28077	28533	42738	42786
P61353	60S ribosomal protein L27	RPL27	sp|P61353|RL27_HUMAN 60S ribosomal protein L27 OS=Homo sapiens OX=9606 GN=RPL27 PE=1 SV=2	44376	43939	30467	39794	27858	17374	44513	42939	39537	37498	46922	45453	36000	33681	36909	26156	48065	45400	27276	36612	55639	59487	42399	39445	44239	43388	35719	35886	46241	48873
P61421	V-type proton ATPase subunit d 1	ATP6V0D1	sp|P61421|VA0D1_HUMAN V-type proton ATPase subunit d 1 OS=Homo sapiens OX=9606 GN=ATP6V0D1 PE=1 SV=1	1	1	1	1	1	1	76048	80456	79029	73054	108280	106050	50616	51503	29517	37649	46362	51021	2056.2	1866.1	1157.9	1156.8	1637.8	1261.3	8693.4	6683.9	6812.7	7069	2166.3	2384.8
P61513	60S ribosomal protein L37a	RPL37A	sp|P61513|RL37A_HUMAN 60S ribosomal protein L37a OS=Homo sapiens OX=9606 GN=RPL37A PE=1 SV=2	7081.6	10627	11772	6310.6	5456.5	7358.8	8515.3	5350.2	9044.7	8066.3	6308.5	7255.8	7714.5	7012	13408	13599	10436	7251.3	10741	7706.3	9186.3	9078.5	8015.9	8596.8	12025	11473	11163	16827	12634	9971.4
P61604	10 kDa heat shock protein, mitochondrial	HSPE1	sp|P61604|CH10_HUMAN 10 kDa heat shock protein, mitochondrial OS=Homo sapiens OX=9606 GN=HSPE1 PE=1 SV=2	10757	10801	1	1	1	1	1	1	1	1	2908.5	2614.5	3732.3	3384.8	1	1	1	1	1	1	1	1	7927.5	9330.6	8946.5	13406	1	1	1	1
P61956-2;Q6EEV6;P61956;P55854;P55854-2	Small ubiquitin-related modifier 2;Small ubiquitin-related modifier 4;Small ubiquitin-related modifier 3	SUMO2;SUMO4;SUMO3	sp|P61956-2|SUMO2_HUMAN Isoform 2 of Small ubiquitin-related modifier 2 OS=Homo sapiens OX=9606 GN=SUMO2;sp|Q6EEV6|SUMO4_HUMAN Small ubiquitin-related modifier 4 OS=Homo sapiens OX=9606 GN=SUMO4 PE=1 SV=2;sp|P61956|SUMO2_HUMAN Small ubiquitin-related modif	16560	26090	1	11692	4231	1	1	1	13774	1	6504.2	6477.3	1	1	6857	1	1	4567.5	1	1	1	1	1	14544	1	13316	1	1	1	1
P61978-3;P61978;P61978-2	Heterogeneous nuclear ribonucleoprotein K	HNRNPK	sp|P61978-3|HNRPK_HUMAN Isoform 3 of Heterogeneous nuclear ribonucleoprotein K OS=Homo sapiens OX=9606 GN=HNRNPK;sp|P61978|HNRPK_HUMAN Heterogeneous nuclear ribonucleoprotein K OS=Homo sapiens OX=9606 GN=HNRNPK PE=1 SV=1;sp|P61978-2|HNRPK_HUMAN Isoform 2 o	60602	61543	37495	36683	21265	26250	20922	24336	32377	27721	39349	39506	48959	49783	40546	39126	39947	43901	40763	41721	56418	54682	61398	59076	59902	60128	36566	34618	43088	42699
P61981	14-3-3 protein gamma;14-3-3 protein gamma, N-terminally processed	YWHAG	sp|P61981|1433G_HUMAN 14-3-3 protein gamma OS=Homo sapiens OX=9606 GN=YWHAG PE=1 SV=2	1	1	1	1	1	1	4498.9	5171.8	3492.7	4751	3520.5	4550.9	4097	3766.6	2179.6	1937.4	3176.4	1	61989	59592	34656	39278	54520	66325	2406.8	3300.3	1	1	1	1
P62070;P62070-4;P62070-3;P62070-2;P10301	Ras-related protein R-Ras2	RRAS2	sp|P62070|RRAS2_HUMAN Ras-related protein R-Ras2 OS=Homo sapiens OX=9606 GN=RRAS2 PE=1 SV=1;sp|P62070-4|RRAS2_HUMAN Isoform 4 of Ras-related protein R-Ras2 OS=Homo sapiens OX=9606 GN=RRAS2;sp|P62070-3|RRAS2_HUMAN Isoform 3 of Ras-related protein R-Ras2 OS=	1	1	1	1	1	1	15856	16310	17670	16514	14816	14139	19019	20478	17724	21417	15824	22885	14384	11312	14711	12413	9036	11558	14624	12605	18634	18661	16057	14301
P62081	40S ribosomal protein S7	RPS7	sp|P62081|RS7_HUMAN 40S ribosomal protein S7 OS=Homo sapiens OX=9606 GN=RPS7 PE=1 SV=1	63488	97491	73082	77543	69696	60736	77161	82461	73024	66896	85600	87521	86394	84209	83813	56099	78850	75732	62668	91090	90897	99129	86688	88887	83785	80153	77737	80646	84758	86689
P62191-2;P62191	26S protease regulatory subunit 4	PSMC1	sp|P62191-2|PRS4_HUMAN Isoform 2 of 26S proteasome regulatory subunit 4 OS=Homo sapiens OX=9606 GN=PSMC1;sp|P62191|PRS4_HUMAN 26S proteasome regulatory subunit 4 OS=Homo sapiens OX=9606 GN=PSMC1 PE=1 SV=1	4447.9	5950.2	1	4600.9	1	3520.7	8021.6	8421.2	11042	11881	15055	12890	13238	14428	12420	11303	9287	10203	8840	12137	11390	11317	13869	11978	9596.5	11011	6182.6	5719.1	9384.7	9663.2
P62195-2;P62195;Q8NB90-3;Q8NB90-2;Q8NB90	26S protease regulatory subunit 8	PSMC5	sp|P62195-2|PRS8_HUMAN Isoform 2 of 26S proteasome regulatory subunit 8 OS=Homo sapiens OX=9606 GN=PSMC5;sp|P62195|PRS8_HUMAN 26S proteasome regulatory subunit 8 OS=Homo sapiens OX=9606 GN=PSMC5 PE=1 SV=1	11070	7225.2	1	1	1	1	8917.4	9689.9	11739	10847	13092	12668	12422	13430	11587	9368.4	11312	12985	6528.3	12019	14943	13994	13342	13001	8339.8	11772	8860.5	9424.9	9531.1	6559.5
P62241	40S ribosomal protein S8	RPS8	sp|P62241|RS8_HUMAN 40S ribosomal protein S8 OS=Homo sapiens OX=9606 GN=RPS8 PE=1 SV=2	123410	133510	94204	96102	74363	74200	99563	96858	81076	83644	100540	106870	91687	86821	66743	87712	95742	96363	85867	67624	91015	87811	95440	97309	94631	94291	68063	74211	92596	86535
P62244	40S ribosomal protein S15a	RPS15A	sp|P62244|RS15A_HUMAN 40S ribosomal protein S15a OS=Homo sapiens OX=9606 GN=RPS15A PE=1 SV=2	29705	26404	14149	14407	3456.2	1553.6	18465	19234	20175	17924	24426	24608	23374	21236	18238	14327	20944	21051	16427	17705	24642	24569	23153	23338	26613	23559	15018	13306	19514	19342
P62249	40S ribosomal protein S16	RPS16	sp|P62249|RS16_HUMAN 40S ribosomal protein S16 OS=Homo sapiens OX=9606 GN=RPS16 PE=1 SV=2	64031	59833	47809	47667	33108	43126	44283	48313	35480	35204	49651	51490	36114	42316	42271	42482	54445	47414	52242	41540	60267	61145	46126	47026	48716	49964	32617	29033	49396	54024
P62258;P62258-2	14-3-3 protein epsilon	YWHAE	sp|P62258|1433E_HUMAN 14-3-3 protein epsilon OS=Homo sapiens OX=9606 GN=YWHAE PE=1 SV=1;sp|P62258-2|1433E_HUMAN Isoform SV of 14-3-3 protein epsilon OS=Homo sapiens OX=9606 GN=YWHAE	34079	35933	5218.7	9323.3	1	3089.6	34598	35356	37973	38340	38167	39782	40333	38335	26025	24116	29100	27440	203380	194150	144360	166320	207340	208190	40215	37929	18640	15635	17525	16951
P62263	40S ribosomal protein S14	RPS14	sp|P62263|RS14_HUMAN 40S ribosomal protein S14 OS=Homo sapiens OX=9606 GN=RPS14 PE=1 SV=3	32804	28921	11599	27763	11854	16296	26561	22073	23313	21694	32611	31892	26111	27629	31543	28094	25990	24374	28374	22324	33378	32910	26327	25313	23967	22168	17681	17845	25356	26448
P62266	40S ribosomal protein S23	RPS23	sp|P62266|RS23_HUMAN 40S ribosomal protein S23 OS=Homo sapiens OX=9606 GN=RPS23 PE=1 SV=3	27893	26466	13159	18061	19994	18357	1	14342	988.38	1	1766.4	12025	1	14145	6410.1	5231.7	1	3705.5	16537	17692	20299	16199	21969	19678	29736	28984	24650	23713	23276	23784
P62269	40S ribosomal protein S18	RPS18	sp|P62269|RS18_HUMAN 40S ribosomal protein S18 OS=Homo sapiens OX=9606 GN=RPS18 PE=1 SV=3	48535	45126	45589	47584	42969	45690	42234	43885	32355	32039	37764	37556	31520	30930	34726	39647	47209	41936	45368	34109	43395	43386	38473	37684	39209	37546	33734	32082	43949	41532
P62273;P62273-2	40S ribosomal protein S29	RPS29	sp|P62273|RS29_HUMAN 40S ribosomal protein S29 OS=Homo sapiens OX=9606 GN=RPS29 PE=1 SV=2;sp|P62273-2|RS29_HUMAN Isoform 2 of 40S ribosomal protein S29 OS=Homo sapiens OX=9606 GN=RPS29	8277.6	9976	1	4725	1	1	1	9076.3	6086.8	4041.9	7260.1	8230.3	6764.3	5250.5	5592.4	1	8211.3	3983.6	1	5062.6	7819.8	7512.9	7972.2	7150.7	8086.4	6783.3	1	4120.4	7459.2	7128.4
P62277	40S ribosomal protein S13	RPS13	sp|P62277|RS13_HUMAN 40S ribosomal protein S13 OS=Homo sapiens OX=9606 GN=RPS13 PE=1 SV=2	12916	8662.6	2077	3818.8	1	1	6147.4	5834	5556.1	5334.6	9374.9	10354	9009.6	8793.2	9337.2	7340.6	7567.5	6514.3	3239.7	6033.7	11510	11011	8999.7	9945.8	7017.9	7174.5	3485.1	1	7662.9	8381
P62280	40S ribosomal protein S11	RPS11	sp|P62280|RS11_HUMAN 40S ribosomal protein S11 OS=Homo sapiens OX=9606 GN=RPS11 PE=1 SV=3	24595	26234	17831	17390	10145	10559	24476	25475	21047	18913	30772	30465	25131	23810	26269	25453	29259	23263	21331	22606	26758	28195	24688	25928	23924	24385	19450	15858	27133	26762
P62304	Small nuclear ribonucleoprotein E	SNRPE	sp|P62304|RUXE_HUMAN Small nuclear ribonucleoprotein E OS=Homo sapiens OX=9606 GN=SNRPE PE=1 SV=1	23068	12068	17201	14435	11405	12110	35243	35697	45533	51352	33785	43809	40956	43236	37638	44219	35823	44494	31787	26829	26693	25958	22852	24353	27295	21854	26445	25093	24250	22806
P62306	Small nuclear ribonucleoprotein F	SNRPF	sp|P62306|RUXF_HUMAN Small nuclear ribonucleoprotein F OS=Homo sapiens OX=9606 GN=SNRPF PE=1 SV=1	1	4631.2	1	1	1	1	27882	29857	31725	31038	30162	27796	23650	22289	18536	19452	18341	14827	16665	1	11995	14524	11180	11884	1	8635.2	4254.7	13119	12956	10238
P62308;A8MWD9	Small nuclear ribonucleoprotein G;Putative small nuclear ribonucleoprotein G-like protein 15	SNRPG;SNRPGP15	sp|P62308|RUXG_HUMAN Small nuclear ribonucleoprotein G OS=Homo sapiens OX=9606 GN=SNRPG PE=1 SV=1;sp|A8MWD9|RUXGL_HUMAN Putative small nuclear ribonucleoprotein G-like protein 15 OS=Homo sapiens OX=9606 GN=SNRPGP15 PE=5 SV=2	5389.7	2207.7	1	1	1	1	5954.8	10859	21875	23230	24683	24075	20418	24081	15562	16375	18286	20807	11203	13113	15835	13979	13114	14547	15860	14897	14548	13161	10271	13950
P62314	Small nuclear ribonucleoprotein Sm D1	SNRPD1	sp|P62314|SMD1_HUMAN Small nuclear ribonucleoprotein Sm D1 OS=Homo sapiens OX=9606 GN=SNRPD1 PE=1 SV=1	14292	18217	21432	22740	22958	15865	17885	16957	20260	20918	18780	19955	17899	18962	18184	9707.3	16895	15650	9721.7	20031	19348	19938	19371	21651	15315	16315	16865	20495	25429	22014
P62316;P62316-2	Small nuclear ribonucleoprotein Sm D2	SNRPD2	sp|P62316|SMD2_HUMAN Small nuclear ribonucleoprotein Sm D2 OS=Homo sapiens OX=9606 GN=SNRPD2 PE=1 SV=1	11450	11634	1	12646	13015	14400	12196	12511	12520	12035	13376	11773	11376	10647	9396.3	1	8649.8	7914.1	13349	9498.1	10610	12215	9726.3	10925	7080.4	7978.4	8443	7238.6	11257	10366
P62318-2;P62318	Small nuclear ribonucleoprotein Sm D3	SNRPD3	sp|P62318-2|SMD3_HUMAN Isoform 2 of Small nuclear ribonucleoprotein Sm D3 OS=Homo sapiens OX=9606 GN=SNRPD3;sp|P62318|SMD3_HUMAN Small nuclear ribonucleoprotein Sm D3 OS=Homo sapiens OX=9606 GN=SNRPD3 PE=1 SV=1	239630	246810	345260	314310	296250	268360	74674	75774	63866	63983	69532	79831	104450	100880	103560	108790	107820	113460	237100	213770	221180	221620	253790	283420	227890	222740	221390	211060	302460	307050
P62333	26S protease regulatory subunit 10B	PSMC6	sp|P62333|PRS10_HUMAN 26S proteasome regulatory subunit 10B OS=Homo sapiens OX=9606 GN=PSMC6 PE=1 SV=1	2319	3569.1	1	1	1	1	5335.5	4594.4	5717.7	4633.6	7386.5	7119.3	7394.4	7513.2	5481.9	3462.8	3801.1	4415.5	1	5174.3	4162.9	4680.6	5829.6	6405.2	4681.9	5887.1	1	1	5092.3	4913.6
P62424	60S ribosomal protein L7a	RPL7A	sp|P62424|RL7A_HUMAN 60S ribosomal protein L7a OS=Homo sapiens OX=9606 GN=RPL7A PE=1 SV=2	29775	27787	26348	27660	24117	24304	40588	40941	33375	32787	43343	45212	34787	33828	33665	29783	45377	40391	28181	30065	42893	44380	34547	35870	35105	35163	26406	26984	42078	38890
P62633-2;P62633-8;P62633-5;P62633;P62633-4;P62633-6	Cellular nucleic acid-binding protein	CNBP	sp|P62633-2|CNBP_HUMAN Isoform 2 of Cellular nucleic acid-binding protein OS=Homo sapiens OX=9606 GN=CNBP;sp|P62633-8|CNBP_HUMAN Isoform 8 of Cellular nucleic acid-binding protein OS=Homo sapiens OX=9606 GN=CNBP;sp|P62633-5|CNBP_HUMAN Isoform 5 of Cellular	19907	12382	1	3052.4	1	1664.2	1174.1	1	3080.2	2158	2337.2	2185	3226.9	4202.4	1	5167.3	1	1	6863.3	6533.9	7202.1	3411.5	6887.3	7726.6	3688.9	3385.9	1	1708.8	3113.6	3497
P62701;P22090;Q8TD47	40S ribosomal protein S4, X isoform	RPS4X	sp|P62701|RS4X_HUMAN 40S ribosomal protein S4, X isoform OS=Homo sapiens OX=9606 GN=RPS4X PE=1 SV=2	38546	41557	34970	37414	32378	28791	42359	49457	39849	38273	47094	46833	39291	39220	43869	40824	43972	43250	46273	44177	45641	47244	43745	41298	45493	43673	43811	41886	47976	47251
P62750	60S ribosomal protein L23a	RPL23A	sp|P62750|RL23A_HUMAN 60S ribosomal protein L23a OS=Homo sapiens OX=9606 GN=RPL23A PE=1 SV=1	112030	100830	91232	117170	97396	85921	128660	131300	95644	98965	109290	119510	101220	96891	119100	119100	128430	107160	113260	110930	118200	119610	111490	116860	107370	98983	98261	96971	120680	113170
P62753	40S ribosomal protein S6	RPS6	sp|P62753|RS6_HUMAN 40S ribosomal protein S6 OS=Homo sapiens OX=9606 GN=RPS6 PE=1 SV=1	45431	43615	27536	38926	28741	33407	40317	39041	32249	33743	45480	50596	40329	34502	36481	41057	35687	40280	39838	37932	44403	40872	39528	37468	33827	34563	28782	32505	36963	37958
P62805	Histone H4	HIST1H4A	sp|P62805|H4_HUMAN Histone H4 OS=Homo sapiens OX=9606 GN=H4C1 PE=1 SV=2	45885	36443	93301	86948	186300	180900	137560	142710	97472	98579	119840	122460	97506	96890	315980	315630	342120	362240	142200	145760	771360	724530	152690	108270	388650	371610	172750	162100	572000	569730
P62826	GTP-binding nuclear protein Ran	RAN	sp|P62826|RAN_HUMAN GTP-binding nuclear protein Ran OS=Homo sapiens OX=9606 GN=RAN PE=1 SV=3	25467	23679	1	2007.6	1	1	31468	31621	44058	40682	29163	30240	30058	29959	19830	20525	22605	22441	12292	10226	11627	13076	16557	17337	21834	23401	8710.8	8068.5	7481.2	7329.8
P62829	60S ribosomal protein L23	RPL23	sp|P62829|RL23_HUMAN 60S ribosomal protein L23 OS=Homo sapiens OX=9606 GN=RPL23 PE=1 SV=1	45425	27884	22871	25894	17271	18330	39254	36083	43447	46869	53245	53072	38796	41722	37444	50149	38670	50253	45040	41671	63305	61863	48370	45195	41882	43418	33981	39242	44003	39817
P62841	40S ribosomal protein S15	RPS15	sp|P62841|RS15_HUMAN 40S ribosomal protein S15 OS=Homo sapiens OX=9606 GN=RPS15 PE=1 SV=2	1	24532	22236	7585.8	2096.3	1	8885.8	15766	36659	32255	45321	52885	42845	40979	31066	25256	33177	31746	28897	30587	39815	38843	37872	42337	30606	38586	27200	29414	31680	32780
P62847-2;P62847-3;P62847;P62847-4	40S ribosomal protein S24	RPS24	sp|P62847-2|RS24_HUMAN Isoform 2 of 40S ribosomal protein S24 OS=Homo sapiens OX=9606 GN=RPS24;sp|P62847-3|RS24_HUMAN Isoform 3 of 40S ribosomal protein S24 OS=Homo sapiens OX=9606 GN=RPS24;sp|P62847|RS24_HUMAN 40S ribosomal protein S24 OS=Homo sapiens OX=	55962	58382	52151	47773	27225	32064	49958	53849	54507	51916	71143	70098	52710	54696	66860	65031	53403	62675	61593	61541	61703	60706	60530	60368	63854	54180	62222	52382	56731	56114
P62851	40S ribosomal protein S25	RPS25	sp|P62851|RS25_HUMAN 40S ribosomal protein S25 OS=Homo sapiens OX=9606 GN=RPS25 PE=1 SV=1	321470	273830	268120	283410	287190	262390	173820	175250	147960	148940	133450	140270	158640	162650	284220	330190	203810	201120	346350	315230	224600	220820	227110	228290	364420	367270	299240	284830	239210	231430
P62854;Q5JNZ5	40S ribosomal protein S26;Putative 40S ribosomal protein S26-like 1	RPS26;RPS26P11	sp|P62854|RS26_HUMAN 40S ribosomal protein S26 OS=Homo sapiens OX=9606 GN=RPS26 PE=1 SV=3;sp|Q5JNZ5|RS26L_HUMAN Putative 40S ribosomal protein S26-like 1 OS=Homo sapiens OX=9606 GN=RPS26P11 PE=5 SV=1	20434	13837	19531	12286	10651	14405	9379.4	11501	16378	12995	24193	19849	17579	19340	26406	32003	24134	27888	22267	20938	24644	25001	26455	24211	20969	25184	18782	20955	19777	25770
P62857	40S ribosomal protein S28	RPS28	sp|P62857|RS28_HUMAN 40S ribosomal protein S28 OS=Homo sapiens OX=9606 GN=RPS28 PE=1 SV=1	57896	49183	71427	57967	50278	51449	51526	34323	37071	36738	47315	55369	46647	48564	51124	62356	50641	54706	58631	50696	61419	58097	54289	50508	45569	44622	42099	51883	53775	50676
P62861	40S ribosomal protein S30	FAU	sp|P62861|RS30_HUMAN 40S ribosomal protein S30 OS=Homo sapiens OX=9606 GN=FAU PE=1 SV=1	56669	38629	40638	50044	47814	45989	53658	51583	41010	40843	28178	17120	46096	43229	85232	89887	53329	46858	60348	69643	51244	54706	54558	54727	64806	66551	83388	90948	60171	58392
P62873;P62873-2;P16520-2;P16520	Guanine nucleotide-binding protein G(I)/G(S)/G(T) subunit beta-1	GNB1	sp|P62873|GBB1_HUMAN Guanine nucleotide-binding protein G(I)/G(S)/G(T) subunit beta-1 OS=Homo sapiens OX=9606 GN=GNB1 PE=1 SV=3;sp|P62873-2|GBB1_HUMAN Isoform 2 of Guanine nucleotide-binding protein G(I)/G(S)/G(T) subunit beta-1 OS=Homo sapiens OX=9606 GN=	1	1	1	1	1	1	78141	79732	96516	95556	80343	82346	91246	90022	83388	79975	89021	88059	59202	49456	56532	56717	65457	67363	104780	101770	84283	80010	79349	74154
P62879;P62879-2;Q9HAV0	Guanine nucleotide-binding protein G(I)/G(S)/G(T) subunit beta-2	GNB2	sp|P62879|GBB2_HUMAN Guanine nucleotide-binding protein G(I)/G(S)/G(T) subunit beta-2 OS=Homo sapiens OX=9606 GN=GNB2 PE=1 SV=3	1	1	1	1	1	1	28438	26538	82514	84852	82298	80995	111780	114800	45872	52793	65891	66466	39475	34978	47608	48350	83991	81870	140110	111980	58168	51441	35125	41512
P62888	60S ribosomal protein L30	RPL30	sp|P62888|RL30_HUMAN 60S ribosomal protein L30 OS=Homo sapiens OX=9606 GN=RPL30 PE=1 SV=2	15616	15890	1	6154.5	1	2613.1	5944.9	3814.2	2475.2	4181.1	4322.2	2405.6	5233.6	5202.8	1	1	1	2249.5	9444.3	1	6620.3	6599.6	10000	9972.7	12170	12863	1	7649.2	5272.4	4465.4
P62899-3;P62899;P62899-2	60S ribosomal protein L31	RPL31	sp|P62899-3|RL31_HUMAN Isoform 3 of 60S ribosomal protein L31 OS=Homo sapiens OX=9606 GN=RPL31;sp|P62899|RL31_HUMAN 60S ribosomal protein L31 OS=Homo sapiens OX=9606 GN=RPL31 PE=1 SV=1;sp|P62899-2|RL31_HUMAN Isoform 2 of 60S ribosomal protein L31 OS=Homo s	45400	41674	53594	50133	48017	49830	58962	60302	45593	45981	47138	47797	47269	45021	59171	67274	56117	46114	69815	56073	53100	48113	50352	51309	57496	55481	54987	56271	57152	52718
P62906	60S ribosomal protein L10a	RPL10A	sp|P62906|RL10A_HUMAN 60S ribosomal protein L10a OS=Homo sapiens OX=9606 GN=RPL10A PE=1 SV=2	21807	19929	4890.9	7718.8	1	1	8226	4340.5	10701	11756	11654	11308	8216.4	8139.9	13407	10474	9471.2	13382	2793	7265.2	11991	11037	11470	11147	12646	13755	4835.9	5922.7	8189.2	1
P62910	60S ribosomal protein L32	RPL32	sp|P62910|RL32_HUMAN 60S ribosomal protein L32 OS=Homo sapiens OX=9606 GN=RPL32 PE=1 SV=2	16472	17252	2655.8	3228.4	1	1912.4	6403.9	7101.7	10563	9273.7	11204	10668	11070	11654	6085.1	5783.9	10434	8864.2	5799.8	8415.4	11965	11987	13279	13750	13315	14497	6868.2	5058.1	6693.1	7168.3
P62913;P62913-2	60S ribosomal protein L11	RPL11	sp|P62913|RL11_HUMAN 60S ribosomal protein L11 OS=Homo sapiens OX=9606 GN=RPL11 PE=1 SV=2;sp|P62913-2|RL11_HUMAN Isoform 2 of 60S ribosomal protein L11 OS=Homo sapiens OX=9606 GN=RPL11	68227	57685	61856	68358	56772	66969	79658	83912	65006	67180	84705	84921	73055	71492	79236	95082	76909	73812	83560	64114	77129	76899	67186	63781	60331	60543	63865	65509	78644	74382
P62917	60S ribosomal protein L8	RPL8	sp|P62917|RL8_HUMAN 60S ribosomal protein L8 OS=Homo sapiens OX=9606 GN=RPL8 PE=1 SV=2	16152	17768	11523	15028	12237	11894	23652	23992	17910	17548	26481	26047	25299	22128	22994	20738	25746	21398	19120	18795	22877	24885	20160	21806	18103	19339	16320	15586	22239	20886
P62937;P62937-2	Peptidyl-prolyl cis-trans isomerase A;Peptidyl-prolyl cis-trans isomerase A, N-terminally processed	PPIA	sp|P62937|PPIA_HUMAN Peptidyl-prolyl cis-trans isomerase A OS=Homo sapiens OX=9606 GN=PPIA PE=1 SV=2;sp|P62937-2|PPIA_HUMAN Isoform 2 of Peptidyl-prolyl cis-trans isomerase A OS=Homo sapiens OX=9606 GN=PPIA	38176	39700	19915	21412	7060.2	7211.8	23234	21401	29286	24075	35590	31256	26509	27510	21173	16663	22270	25252	9816	17852	19755	19136	40516	39503	30068	31049	10684	10328	13380	15715
P62987;P62979;P0CG47;P0CG48	Ubiquitin-60S ribosomal protein L40;Ubiquitin;60S ribosomal protein L40;Ubiquitin-40S ribosomal protein S27a;Ubiquitin;40S ribosomal protein S27a;Polyubiquitin-B;Ubiquitin;Polyubiquitin-C;Ubiquitin	UBA52;RPS27A;UBB;UBC	sp|P62987|RL40_HUMAN Ubiquitin-60S ribosomal protein L40 OS=Homo sapiens OX=9606 GN=UBA52 PE=1 SV=2;sp|P62979|RS27A_HUMAN Ubiquitin-40S ribosomal protein S27a OS=Homo sapiens OX=9606 GN=RPS27A PE=1 SV=2;sp|P0CG47|UBB_HUMAN Polyubiquitin-B OS=Homo sapiens O	2898.5	1963	1	8732.2	20811	17118	41736	40786	21854	21004	20372	21412	11279	12548	22392	25563	23959	19334	8113.8	7167.4	12790	13549	7417.5	8439.7	6660.3	5854.3	7810	8563.8	15414	14923
P62995-3;P62995	Transformer-2 protein homolog beta	TRA2B	sp|P62995-3|TRA2B_HUMAN Isoform 3 of Transformer-2 protein homolog beta OS=Homo sapiens OX=9606 GN=TRA2B;sp|P62995|TRA2B_HUMAN Transformer-2 protein homolog beta OS=Homo sapiens OX=9606 GN=TRA2B PE=1 SV=1	1	1	1	1	1	1	1	433.32	1	1	1	1	1	1	1	1	1	1	1	1	13960	11476	1	1	322.7	969.55	1	1	4015.8	2132.2
P63000-2;P63000;P15153	Ras-related C3 botulinum toxin substrate 1;Ras-related C3 botulinum toxin substrate 2	RAC1;RAC2	sp|P63000-2|RAC1_HUMAN Isoform B of Ras-related C3 botulinum toxin substrate 1 OS=Homo sapiens OX=9606 GN=RAC1;sp|P63000|RAC1_HUMAN Ras-related C3 botulinum toxin substrate 1 OS=Homo sapiens OX=9606 GN=RAC1 PE=1 SV=1;sp|P15153|RAC2_HUMAN Ras-related C3 bot	1	1	1	1	1	1	1971.2	3819.5	7884.8	7064.9	3570	1	5511.4	5347.3	4760.9	2458.3	4372.7	1	1	1	1531.5	3539.4	1030.6	1541.2	1	1	1	1	1	1
P63092;P63092-4;Q5JWF2;P63092-3;P63092-2;Q5JWF2-2;P38405;P38405-2	Guanine nucleotide-binding protein G(s) subunit alpha isoforms short;Guanine nucleotide-binding protein G(s) subunit alpha isoforms XLas	GNAS	sp|P63092|GNAS2_HUMAN Guanine nucleotide-binding protein G(s) subunit alpha isoforms short OS=Homo sapiens OX=9606 GN=GNAS PE=1 SV=1;sp|P63092-4|GNAS2_HUMAN Isoform 4 of Guanine nucleotide-binding protein G(s) subunit alpha isoforms short OS=Homo sapiens O	1	1	1	1	1	1	23717	23925	26762	26160	22141	22582	30412	30116	29214	30426	30235	28007	19897	15949	16921	16706	17959	17110	23045	24342	21560	21632	21422	20270
P63096;P63096-2	Guanine nucleotide-binding protein G(i) subunit alpha-1	GNAI1	sp|P63096|GNAI1_HUMAN Guanine nucleotide-binding protein G(i) subunit alpha-1 OS=Homo sapiens OX=9606 GN=GNAI1 PE=1 SV=2;sp|P63096-2|GNAI1_HUMAN Isoform 2 of Guanine nucleotide-binding protein G(i) subunit alpha-1 OS=Homo sapiens OX=9606 GN=GNAI1	1	1	1	1	1	1	7327.9	9962.7	5492	4466.3	8415.7	8159.4	6732.2	9206.8	10024	11476	4645.2	5379.7	1233.3	1	2837.6	1772.9	1	2118.5	9984.1	9712	3055.8	4688.8	6675.4	2446.5
P63104;P63104-2	14-3-3 protein zeta/delta	YWHAZ	sp|P63104|1433Z_HUMAN 14-3-3 protein zeta/delta OS=Homo sapiens OX=9606 GN=YWHAZ PE=1 SV=1	24942	25319	1	1	1	1	18376	18550	22475	21837	22487	22292	24285	23794	12376	15235	16268	14147	117000	93632	70786	73959	104590	117280	30923	29055	11003	9912.5	9413.7	7789.8
P63167;Q96FJ2	Dynein light chain 1, cytoplasmic;Dynein light chain 2, cytoplasmic	DYNLL1;DYNLL2	sp|P63167|DYL1_HUMAN Dynein light chain 1, cytoplasmic OS=Homo sapiens OX=9606 GN=DYNLL1 PE=1 SV=1;sp|Q96FJ2|DYL2_HUMAN Dynein light chain 2, cytoplasmic OS=Homo sapiens OX=9606 GN=DYNLL2 PE=1 SV=1	3686.2	5018.3	1	2701.1	2086.4	1	1	3605.8	4515.5	4457	5086	6039.9	5080.2	4490.4	5779.4	1	4026.6	4098.3	1	5900.4	5032.6	5310.6	2890.1	3990.4	5498.5	5585.8	5265	4372.6	5496.8	5345.8
P63173	60S ribosomal protein L38	RPL38	sp|P63173|RL38_HUMAN 60S ribosomal protein L38 OS=Homo sapiens OX=9606 GN=RPL38 PE=1 SV=2	52148	40010	31554	33001	33818	22955	29928	28891	37508	36718	32221	31448	39192	36611	38717	16636	33141	41178	24362	49879	38923	39540	39125	40297	47816	49403	51528	57113	45077	43647
P63208	S-phase kinase-associated protein 1	SKP1	sp|P63208|SKP1_HUMAN S-phase kinase-associated protein 1 OS=Homo sapiens OX=9606 GN=SKP1 PE=1 SV=2	1	1	1	1	1	1	1	1507.9	1	1	1	1	2606	2356.5	1	1	1	1	1	1	1	2047.8	1	1	1	1	1	1	1	1
P63220	40S ribosomal protein S21	RPS21	sp|P63220|RS21_HUMAN 40S ribosomal protein S21 OS=Homo sapiens OX=9606 GN=RPS21 PE=1 SV=1	34808	34859	43812	42746	35983	29225	38741	36706	31003	31375	45561	48019	39880	37755	42745	37260	40848	39269	35502	34659	37391	37354	32747	33836	28756	27542	31352	31609	40078	40007
P63241;P63241-2;Q9GZV4;Q6IS14	Eukaryotic translation initiation factor 5A-1;Eukaryotic translation initiation factor 5A-2;Eukaryotic translation initiation factor 5A-1-like	EIF5A;EIF5A2;EIF5AL1	sp|P63241|IF5A1_HUMAN Eukaryotic translation initiation factor 5A-1 OS=Homo sapiens OX=9606 GN=EIF5A PE=1 SV=2;sp|P63241-2|IF5A1_HUMAN Isoform 2 of Eukaryotic translation initiation factor 5A-1 OS=Homo sapiens OX=9606 GN=EIF5A;sp|Q9GZV4|IF5A2_HUMAN Eukaryo	68757	81276	60678	54305	46784	34137	44494	39131	48352	51433	58627	62316	58309	60436	47715	36891	51714	54209	27884	58064	44552	43750	62218	64494	64035	67921	49428	46856	48820	45616
P63244	Guanine nucleotide-binding protein subunit beta-2-like 1;Guanine nucleotide-binding protein subunit beta-2-like 1, N-terminally processed	GNB2L1	sp|P63244|RACK1_HUMAN Receptor of activated protein C kinase 1 OS=Homo sapiens OX=9606 GN=RACK1 PE=1 SV=3	72028	63788	51136	55703	41447	39819	48469	49309	56285	55757	68200	70974	63807	64993	55847	51251	57038	58431	49497	52971	59896	60064	63498	62188	59052	60221	43704	43340	52699	53253
P63261	Actin, cytoplasmic 2;Actin, cytoplasmic 2, N-terminally processed	ACTG1	sp|P63261|ACTG_HUMAN Actin, cytoplasmic 2 OS=Homo sapiens OX=9606 GN=ACTG1 PE=1 SV=1	354140	332230	181550	173340	170540	174230	512450	494950	363780	369030	323060	337350	546850	547680	468510	476130	474650	453110	327310	305480	643140	635030	393290	369880	893200	873030	467490	424870	669470	652980
P63313	Thymosin beta-10	TMSB10	sp|P63313|TYB10_HUMAN Thymosin beta-10 OS=Homo sapiens OX=9606 GN=TMSB10 PE=1 SV=2	22156	20871	1	1	1	1	1	1	1	1	1	2931.2	1	2751.6	1	1	1	1	1	1	1	1	7780.1	1	14243	12992	1	1	1	1
P67809	Nuclease-sensitive element-binding protein 1	YBX1	sp|P67809|YBOX1_HUMAN Y-box-binding protein 1 OS=Homo sapiens OX=9606 GN=YBX1 PE=1 SV=3	21726	22773	10711	13473	13477	11522	24875	24351	15669	16899	20723	22339	23622	22087	21136	16696	24812	20334	10432	16528	34779	33564	20201	21132	22025	21936	15476	13922	23740	24991
P68104;Q5VTE0;P68104-2;Q05639	Elongation factor 1-alpha 1;Putative elongation factor 1-alpha-like 3	EEF1A1;EEF1A1P5	sp|P68104|EF1A1_HUMAN Elongation factor 1-alpha 1 OS=Homo sapiens OX=9606 GN=EEF1A1 PE=1 SV=1;sp|Q5VTE0|EF1A3_HUMAN Putative elongation factor 1-alpha-like 3 OS=Homo sapiens OX=9606 GN=EEF1A1P5 PE=5 SV=1;sp|P68104-2|EF1A1_HUMAN Isoform 2 of Elongation fact	426750	446620	391860	357850	324920	302530	322910	320700	331150	323360	372700	380420	398590	389740	368410	329100	398250	400940	325840	389310	355190	361700	441610	448980	426400	425850	370860	369480	369960	366980
P68133;P68032;P63267;P62736	Actin, alpha skeletal muscle;Actin, alpha cardiac muscle 1;Actin, gamma-enteric smooth muscle;Actin, aortic smooth muscle	ACTA1;ACTC1;ACTG2;ACTA2	sp|P68133|ACTS_HUMAN Actin, alpha skeletal muscle OS=Homo sapiens OX=9606 GN=ACTA1 PE=1 SV=1;sp|P68032|ACTC_HUMAN Actin, alpha cardiac muscle 1 OS=Homo sapiens OX=9606 GN=ACTC1 PE=1 SV=1;sp|P63267|ACTH_HUMAN Actin, gamma-enteric smooth muscle OS=Homo sapie	117650	112160	49928	50475	39102	40647	169480	195670	139060	145280	84388	91243	214250	208790	207310	207150	145710	152080	80713	88662	250910	236420	113130	133310	334870	363850	168710	137760	256000	247780
P68363;P68363-2;A6NHL2-2;A6NHL2;Q9H853	Tubulin alpha-1B chain	TUBA1B	sp|P68363|TBA1B_HUMAN Tubulin alpha-1B chain OS=Homo sapiens OX=9606 GN=TUBA1B PE=1 SV=1;sp|P68363-2|TBA1B_HUMAN Isoform 2 of Tubulin alpha-1B chain OS=Homo sapiens OX=9606 GN=TUBA1B	817350	828890	772420	766510	601590	598430	1323900	1255000	1421300	1387600	1306800	1298200	1377700	1360400	1344000	1330100	1375400	1466400	1214900	1258000	1172400	1155600	1220200	1205800	973570	989350	1135000	1138100	1046200	1009900
P68366-2;P68366	Tubulin alpha-4A chain	TUBA4A	sp|P68366-2|TBA4A_HUMAN Isoform 2 of Tubulin alpha-4A chain OS=Homo sapiens OX=9606 GN=TUBA4A;sp|P68366|TBA4A_HUMAN Tubulin alpha-4A chain OS=Homo sapiens OX=9606 GN=TUBA4A PE=1 SV=1	1	1	1	1	1	1	3668.9	3278.8	20807	28860	4022.1	2327.7	16009	23847	21095	27214	9775	10595	1	1	1	1	1	844.55	1	1	1	1	1	1
P68371	Tubulin beta-4B chain	TUBB4B	sp|P68371|TBB4B_HUMAN Tubulin beta-4B chain OS=Homo sapiens OX=9606 GN=TUBB4B PE=1 SV=1	513670	462420	457610	446360	362590	358730	1389100	1353300	1590200	1656400	1375300	1395300	1416400	1410000	1385600	1358100	1585600	1611800	1174200	1256200	1122600	1130900	1185600	1180000	918690	911350	1042600	1049700	939360	905070
P69905	Hemoglobin subunit alpha	HBA1	sp|P69905|HBA_HUMAN Hemoglobin subunit alpha OS=Homo sapiens OX=9606 GN=HBA1 PE=1 SV=2	1	1	1	1	1	1	1	1	2225.3	1	566.68	1	10999	12333	1206.6	1	1337.2	1	1	1	1	1	945.64	1	1	1	1	1	1	1
P78347-2;P78347-4;P78347-3;P78347;P78347-5;Q86UP8-3;Q86UP8;Q6EKJ0	General transcription factor II-I	GTF2I	sp|P78347-2|GTF2I_HUMAN Isoform 2 of General transcription factor II-I OS=Homo sapiens OX=9606 GN=GTF2I;sp|P78347-4|GTF2I_HUMAN Isoform 4 of General transcription factor II-I OS=Homo sapiens OX=9606 GN=GTF2I;sp|P78347-3|GTF2I_HUMAN Isoform 3 of General tra	14405	11052	10036	15255	8895.8	11225	12834	14406	11669	12105	14408	14066	16134	15735	14233	18057	13760	12392	16480	15032	13537	13715	14932	13950	17168	16889	13122	12905	17909	17629
P78371;P78371-2	T-complex protein 1 subunit beta	CCT2	sp|P78371|TCPB_HUMAN T-complex protein 1 subunit beta OS=Homo sapiens OX=9606 GN=CCT2 PE=1 SV=4;sp|P78371-2|TCPB_HUMAN Isoform 2 of T-complex protein 1 subunit beta OS=Homo sapiens OX=9606 GN=CCT2	33833	31911	11025	10663	1873.3	1619.3	18945	20237	29664	28286	33950	32305	33202	34642	25122	25389	20220	26864	20301	21180	28055	26205	30324	30049	33934	34091	19153	16194	14808	15018
P78527;P78527-2	DNA-dependent protein kinase catalytic subunit	PRKDC	sp|P78527|PRKDC_HUMAN DNA-dependent protein kinase catalytic subunit OS=Homo sapiens OX=9606 GN=PRKDC PE=1 SV=3;sp|P78527-2|PRKDC_HUMAN Isoform 2 of DNA-dependent protein kinase catalytic subunit OS=Homo sapiens OX=9606 GN=PRKDC	1364.6	1277.9	1	5399	3842.1	1	82564	83603	104690	104640	52717	50650	58725	52782	42070	44049	46516	49532	26241	25278	18885	22019	22109	21718	14371	14946	11432	14409	8086	7822.2
P81605;P81605-2	Dermcidin;Survival-promoting peptide;DCD-1	DCD	sp|P81605|DCD_HUMAN Dermcidin OS=Homo sapiens OX=9606 GN=DCD PE=1 SV=2;sp|P81605-2|DCD_HUMAN Isoform 2 of Dermcidin OS=Homo sapiens OX=9606 GN=DCD	1	1	1	1	1	1	1	1	1	1	1	1	1	1	1	1	3581.7	1759.7	1	1	1	1	1	2055.8	2249.2	2691	1	2363.8	1	1
P83731	60S ribosomal protein L24	RPL24	sp|P83731|RL24_HUMAN 60S ribosomal protein L24 OS=Homo sapiens OX=9606 GN=RPL24 PE=1 SV=1	42290	32506	37590	32169	25341	32291	43677	46305	38034	37004	44812	41341	37128	33548	34070	38285	44151	47576	40269	35553	40254	40457	38014	35752	34890	33875	36142	31415	39841	34624
P84077;P61204;P61204-2;P84085;P18085	ADP-ribosylation factor 1;ADP-ribosylation factor 3;ADP-ribosylation factor 5	ARF1;ARF3;ARF5	sp|P84077|ARF1_HUMAN ADP-ribosylation factor 1 OS=Homo sapiens OX=9606 GN=ARF1 PE=1 SV=2;sp|P61204|ARF3_HUMAN ADP-ribosylation factor 3 OS=Homo sapiens OX=9606 GN=ARF3 PE=1 SV=2;sp|P61204-2|ARF3_HUMAN Isoform 2 of ADP-ribosylation factor 3 OS=Homo sapiens	68840	69454	17628	9200.9	46103	28837	32150	28557	133510	98571	65091	56914	86148	88174	59505	45114	67588	68156	24068	28750	38468	31884	50340	49667	58063	66683	25017	15552	13589	11717
P84090	Enhancer of rudimentary homolog	ERH	sp|P84090|ERH_HUMAN Enhancer of rudimentary homolog OS=Homo sapiens OX=9606 GN=ERH PE=1 SV=1	46410	43193	42203	46402	39530	37112	4677.7	7811.4	1196.4	3555.8	10732	11810	17872	18251	15496	12888	13970	11141	21457	23075	61914	61869	25214	19179	21372	28521	11860	9465.5	39482	38824
P84098	60S ribosomal protein L19	RPL19	sp|P84098|RL19_HUMAN 60S ribosomal protein L19 OS=Homo sapiens OX=9606 GN=RPL19 PE=1 SV=1	32632	28665	15847	22147	1	14377	34345	35264	31461	29569	40044	40597	31476	32543	28595	37551	27651	23019	30987	22599	33233	32985	26244	26547	20856	23923	17972	18159	23352	25217
P84101-4;P84101;P84101-3;P84101-2	Small EDRK-rich factor 2	SERF2	sp|P84101-4|SERF2_HUMAN Isoform 4 of Small EDRK-rich factor 2 OS=Homo sapiens OX=9606 GN=SERF2;sp|P84101|SERF2_HUMAN Small EDRK-rich factor 2 OS=Homo sapiens OX=9606 GN=SERF2 PE=1 SV=1;sp|P84101-3|SERF2_HUMAN Isoform 3 of Small EDRK-rich factor 2 OS=Homo s	1	1	1	1	1	1	16165	15417	10660	8238.5	13491	1	15825	16936	21696	27832	20302	17968	30414	24426	16214	17409	15561	15438	15979	18198	23142	23186	19120	18187
P84103-2;P84103	Serine/arginine-rich splicing factor 3	SRSF3	sp|P84103-2|SRSF3_HUMAN Isoform 2 of Serine/arginine-rich splicing factor 3 OS=Homo sapiens OX=9606 GN=SRSF3;sp|P84103|SRSF3_HUMAN Serine/arginine-rich splicing factor 3 OS=Homo sapiens OX=9606 GN=SRSF3 PE=1 SV=1	692420	617100	1028800	1046500	1073000	1048200	832030	856000	586340	592580	528840	534680	535960	535900	822500	828770	873850	853790	968870	968120	712500	733030	670670	696060	720490	709590	1102700	1147100	1012500	968130
P84243;Q16695;P68431;Q6NXT2	Histone H3.3;Histone H3.1t;Histone H3.1;Histone H3.3C	H3F3A;HIST3H3;HIST1H3A;H3F3C	sp|P84243|H33_HUMAN Histone H3.3 OS=Homo sapiens OX=9606 GN=H3-3A PE=1 SV=2;sp|Q16695|H31T_HUMAN Histone H3.1t OS=Homo sapiens OX=9606 GN=H3-4 PE=1 SV=3;sp|P68431|H31_HUMAN Histone H3.1 OS=Homo sapiens OX=9606 GN=H3C1 PE=1 SV=2;sp|Q6NXT2|H3C_HUMAN Histone	28240	28539	63087	64470	129970	127770	108700	105190	63332	67694	83297	85322	63987	67225	191260	188400	243100	222310	99717	93027	564670	575090	100890	76306	255730	245400	108910	101180	408890	414970
P98175-2;P98175;P98175-5;P98175-4;P98175-3;P52756	RNA-binding protein 10	RBM10	sp|P98175-2|RBM10_HUMAN Isoform 2 of RNA-binding protein 10 OS=Homo sapiens OX=9606 GN=RBM10;sp|P98175|RBM10_HUMAN RNA-binding protein 10 OS=Homo sapiens OX=9606 GN=RBM10 PE=1 SV=3;sp|P98175-5|RBM10_HUMAN Isoform 5 of RNA-binding protein 10 OS=Homo sapiens	55063	51744	68483	75333	79086	75609	21982	21058	12416	13007	19931	20125	25888	25924	34262	33248	28457	27475	53152	56326	48749	49457	52148	53378	45119	43216	49910	51641	85340	87436
P98179	RNA-binding protein 3	RBM3	sp|P98179|RBM3_HUMAN RNA-binding protein 3 OS=Homo sapiens OX=9606 GN=RBM3 PE=1 SV=1	5957.8	2354.3	1	1	1	1	1	1	1	1	1	1	1	1	1	1	1	1	1	1	979.61	1	1	893.54	10788	7536.6	1	1	1	1
Q00059;Q00059-2	Transcription factor A, mitochondrial	TFAM	sp|Q00059|TFAM_HUMAN Transcription factor A, mitochondrial OS=Homo sapiens OX=9606 GN=TFAM PE=1 SV=1;sp|Q00059-2|TFAM_HUMAN Isoform 2 of Transcription factor A, mitochondrial OS=Homo sapiens OX=9606 GN=TFAM	32147	31275	36234	42524	42638	42634	34658	32992	23511	23971	17750	18306	15876	15434	32482	25504	25452	25569	32276	43370	36234	37309	25653	24729	32452	32543	48007	49300	40419	38676
Q00325-2;Q00325	Phosphate carrier protein, mitochondrial	SLC25A3	sp|Q00325-2|MPCP_HUMAN Isoform B of Phosphate carrier protein, mitochondrial OS=Homo sapiens OX=9606 GN=SLC25A3;sp|Q00325|MPCP_HUMAN Phosphate carrier protein, mitochondrial OS=Homo sapiens OX=9606 GN=SLC25A3 PE=1 SV=2	77791	53513	68701	68498	59727	62284	276120	266920	290950	280310	242280	243050	188790	186410	178370	181170	225410	230280	178310	196560	163070	165020	169600	172720	103690	105700	136690	139620	127680	127390
Q00535;Q00535-2	Cyclin-dependent-like kinase 5	CDK5	sp|Q00535|CDK5_HUMAN Cyclin-dependent-like kinase 5 OS=Homo sapiens OX=9606 GN=CDK5 PE=1 SV=3;sp|Q00535-2|CDK5_HUMAN Isoform 2 of Cyclin-dependent-like kinase 5 OS=Homo sapiens OX=9606 GN=CDK5	7962.7	7902.8	1	1	1	1	6213.3	5066.1	4851.1	9301.4	5977.8	6918.7	6689.7	7678.1	3316.9	7053.6	7234.3	3620.9	1	6591.2	2877.5	3965.2	6998.6	7760.1	4160.5	5883.2	1	5758	7158.3	3711.9
Q00610-2;Q00610;P53675-2;P53675	Clathrin heavy chain 1	CLTC	sp|Q00610-2|CLH1_HUMAN Isoform 2 of Clathrin heavy chain 1 OS=Homo sapiens OX=9606 GN=CLTC;sp|Q00610|CLH1_HUMAN Clathrin heavy chain 1 OS=Homo sapiens OX=9606 GN=CLTC PE=1 SV=5	15402	13314	1963.7	3708.4	1	1921.3	20775	17929	33448	32857	35078	36406	34133	33983	23059	22720	24853	27275	13682	14148	17132	16412	19603	20422	27299	29180	12487	12591	14208	14464
Q00688	Peptidyl-prolyl cis-trans isomerase FKBP3	FKBP3	sp|Q00688|FKBP3_HUMAN Peptidyl-prolyl cis-trans isomerase FKBP3 OS=Homo sapiens OX=9606 GN=FKBP3 PE=1 SV=1	18695	14017	1	13027	12540	8815.3	12082	10743	9149.8	11083	7619.7	1	6381	8464.6	13060	7588.1	16675	1	8838.7	17665	10062	16600	15646	11992	15931	13429	12216	13391	13717	13813
Q00839-2;Q00839	Heterogeneous nuclear ribonucleoprotein U	HNRNPU	sp|Q00839-2|HNRPU_HUMAN Isoform 2 of Heterogeneous nuclear ribonucleoprotein U OS=Homo sapiens OX=9606 GN=HNRNPU;sp|Q00839|HNRPU_HUMAN Heterogeneous nuclear ribonucleoprotein U OS=Homo sapiens OX=9606 GN=HNRNPU PE=1 SV=6	22045	16323	16230	17309	22114	30265	37113	37719	20169	20405	24978	24582	29550	30094	32455	32779	38856	38041	25727	23353	106420	100700	30034	26040	41007	39760	22938	21359	59208	58729
Q01082;Q01082-3;Q01082-2	Spectrin beta chain, non-erythrocytic 1	SPTBN1	sp|Q01082|SPTB2_HUMAN Spectrin beta chain, non-erythrocytic 1 OS=Homo sapiens OX=9606 GN=SPTBN1 PE=1 SV=2;sp|Q01082-3|SPTB2_HUMAN Isoform 2 of Spectrin beta chain, non-erythrocytic 1 OS=Homo sapiens OX=9606 GN=SPTBN1;sp|Q01082-2|SPTB2_HUMAN Isoform Short o	3342.7	1	1	3634	1	2109.9	7061.5	10714	5994	9649.6	11957	11745	19998	23394	23545	21875	17010	16945	4625.9	3592.8	33837	26987	5422.4	6400.4	15570	20203	12301	2799.3	26107	26199
Q01105-3;Q01105-4;Q01105-2;Q01105;P0DME0	Protein SET;Protein SETSIP	SET;SETSIP	sp|Q01105-3|SET_HUMAN Isoform 3 of Protein SET OS=Homo sapiens OX=9606 GN=SET;sp|Q01105-4|SET_HUMAN Isoform 4 of Protein SET OS=Homo sapiens OX=9606 GN=SET;sp|Q01105-2|SET_HUMAN Isoform 2 of Protein SET OS=Homo sapiens OX=9606 GN=SET;sp|Q01105|SET_HUMAN Pr	25196	13314	1	1	1	1	1	1	1	1	2572.8	1	2836.5	2940.4	2281.8	2015.4	1	2273.5	1	1165.4	5146.6	2704.7	13162	9978.7	18363	21302	1	1	1	1
Q01130-2;Q01130;Q9BRL6-2;Q9BRL6	Serine/arginine-rich splicing factor 2	SRSF2	sp|Q01130-2|SRSF2_HUMAN Isoform 2 of Serine/arginine-rich splicing factor 2 OS=Homo sapiens OX=9606 GN=SRSF2;sp|Q01130|SRSF2_HUMAN Serine/arginine-rich splicing factor 2 OS=Homo sapiens OX=9606 GN=SRSF2 PE=1 SV=4	354980	330070	508580	543890	571310	605220	463780	449960	298250	313810	307500	316740	236840	243580	408370	477790	436960	406990	649630	528080	378040	372120	330790	330470	332220	336450	592730	610760	510980	468380
Q01804;Q01804-3;Q01804-5;Q01804-4	OTU domain-containing protein 4	OTUD4	sp|Q01804|OTUD4_HUMAN OTU domain-containing protein 4 OS=Homo sapiens OX=9606 GN=OTUD4 PE=1 SV=4;sp|Q01804-3|OTUD4_HUMAN Isoform 3 of OTU domain-containing protein 4 OS=Homo sapiens OX=9606 GN=OTUD4;sp|Q01804-5|OTUD4_HUMAN Isoform 2 of OTU domain-containin	65554	65473	79880	90452	85562	85091	8845.9	5509.9	6074.9	4243.4	9657.8	10599	10737	10429	12325	13102	13099	9650.5	32571	29894	28750	29341	31277	32653	24930	26405	21682	19573	41289	41451
Q01844-2;Q01844-6;Q01844-3;Q01844;Q01844-5	RNA-binding protein EWS	EWSR1	sp|Q01844-2|EWS_HUMAN Isoform EWS-B of RNA-binding protein EWS OS=Homo sapiens OX=9606 GN=EWSR1;sp|Q01844-6|EWS_HUMAN Isoform 6 of RNA-binding protein EWS OS=Homo sapiens OX=9606 GN=EWSR1;sp|Q01844-3|EWS_HUMAN Isoform 3 of RNA-binding protein EWS OS=Homo s	16522	10030	1	1	1	1	1	1	1	2459.2	1	1	1	1	1	1147.3	1	1	1063.7	1	1	1	1	1	6546.8	2537.5	1	1046.6	1	1
Q02413;Q02413-2	Desmoglein-1	DSG1	sp|Q02413|DSG1_HUMAN Desmoglein-1 OS=Homo sapiens OX=9606 GN=DSG1 PE=1 SV=2	1	1	1	1	39178	39157	1	1	1	1	1	1	1	1	1	1	1	1	1	1	1	1	1	1	1	1	1	1	1	1
Q02543	60S ribosomal protein L18a	RPL18A	sp|Q02543|RL18A_HUMAN 60S ribosomal protein L18a OS=Homo sapiens OX=9606 GN=RPL18A PE=1 SV=2	10280	8529.7	1	4881.8	1	1	9456.1	12896	11318	12114	13903	14678	12040	12381	9441.2	8074.8	11376	12711	9437.7	9041.1	13248	13221	10617	11545	11942	11782	7286.2	4988	8926	9379.3
Q02790	Peptidyl-prolyl cis-trans isomerase FKBP4;Peptidyl-prolyl cis-trans isomerase FKBP4, N-terminally processed	FKBP4	sp|Q02790|FKBP4_HUMAN Peptidyl-prolyl cis-trans isomerase FKBP4 OS=Homo sapiens OX=9606 GN=FKBP4 PE=1 SV=3	2661.4	4339.2	1	1	1	1	1	1	1	1	1	1	1	1	1	1	1	1	1	1	1	1	1	1	1751.9	3617	1	1	1	1
Q02878	60S ribosomal protein L6	RPL6	sp|Q02878|RL6_HUMAN 60S ribosomal protein L6 OS=Homo sapiens OX=9606 GN=RPL6 PE=1 SV=3	28543	25317	21968	26150	18837	16915	27008	29708	23160	24889	32641	32037	26079	26511	26902	26291	29985	32933	23453	24031	37866	38478	26035	27468	29272	29835	21795	20860	29039	30307
Q02978;Q02978-2	Mitochondrial 2-oxoglutarate/malate carrier protein	SLC25A11	sp|Q02978|M2OM_HUMAN Mitochondrial 2-oxoglutarate/malate carrier protein OS=Homo sapiens OX=9606 GN=SLC25A11 PE=1 SV=3;sp|Q02978-2|M2OM_HUMAN Isoform 2 of Mitochondrial 2-oxoglutarate/malate carrier protein OS=Homo sapiens OX=9606 GN=SLC25A11	44558	36059	33642	32057	37149	39456	125270	122000	143960	144630	121220	116630	98581	96779	94454	104630	116420	125560	105200	92491	79449	78184	77855	77358	66681	68126	79491	78984	71884	69000
Q03393	6-pyruvoyl tetrahydrobiopterin synthase	PTS	sp|Q03393|PTPS_HUMAN 6-pyruvoyl tetrahydrobiopterin synthase OS=Homo sapiens OX=9606 GN=PTS PE=1 SV=1	30453	30239	27439	31584	30329	27280	25987	25276	25644	23959	31112	32420	29645	29972	37917	35611	47926	50997	52791	50885	42767	45000	52964	55208	55900	55272	60286	60782	90760	92176
Q04837	Single-stranded DNA-binding protein, mitochondrial	SSBP1	sp|Q04837|SSBP_HUMAN Single-stranded DNA-binding protein, mitochondrial OS=Homo sapiens OX=9606 GN=SSBP1 PE=1 SV=1	1	1	1	1	1	1	1	1	2350.8	1	1	1	1	1	506.69	1	1	1	1	1	1	919.65	1	1	1	1	1	1	1	1
Q04917	14-3-3 protein eta	YWHAH	sp|Q04917|1433F_HUMAN 14-3-3 protein eta OS=Homo sapiens OX=9606 GN=YWHAH PE=1 SV=4	1	92.892	1	1	1	1	934.35	1634.2	1981.5	838.35	1515.4	1025.8	1799.7	1586.2	624.87	1496	675.6	365.09	54346	45388	34436	37114	50613	49193	924.49	580.72	1	1	1	1
Q05519-2;Q05519	Serine/arginine-rich splicing factor 11	SRSF11	sp|Q05519-2|SRS11_HUMAN Isoform 2 of Serine/arginine-rich splicing factor 11 OS=Homo sapiens OX=9606 GN=SRSF11;sp|Q05519|SRS11_HUMAN Serine/arginine-rich splicing factor 11 OS=Homo sapiens OX=9606 GN=SRSF11 PE=1 SV=1	289110	278140	397300	444970	471120	440600	381640	390320	248030	242410	271010	279220	294380	276680	432190	433070	334620	311910	433690	452730	297490	305950	273300	283360	262530	255090	435530	464690	409650	383940
Q06830;Q13162	Peroxiredoxin-1	PRDX1	sp|Q06830|PRDX1_HUMAN Peroxiredoxin-1 OS=Homo sapiens OX=9606 GN=PRDX1 PE=1 SV=1	73597	65375	39802	38395	38728	38340	34278	35277	32663	33263	37301	38665	41288	41624	33644	36115	38628	38297	38778	32867	33583	34137	49245	50618	61504	61277	36642	32835	34872	32172
Q07020;Q07020-2	60S ribosomal protein L18	RPL18	sp|Q07020|RL18_HUMAN 60S ribosomal protein L18 OS=Homo sapiens OX=9606 GN=RPL18 PE=1 SV=2;sp|Q07020-2|RL18_HUMAN Isoform 2 of 60S ribosomal protein L18 OS=Homo sapiens OX=9606 GN=RPL18	68260	70678	64763	74052	57480	56710	78584	82700	60782	59121	85576	98136	64760	64403	63231	73330	91396	86490	73510	61176	109370	112740	69556	72658	72626	77555	65771	63919	90365	90307
Q07021	Complement component 1 Q subcomponent-binding protein, mitochondrial	C1QBP	sp|Q07021|C1QBP_HUMAN Complement component 1 Q subcomponent-binding protein, mitochondrial OS=Homo sapiens OX=9606 GN=C1QBP PE=1 SV=1	21122	18523	1	2859.2	1	1	14283	14084	19755	17724	18164	17884	10207	10643	10790	9080.2	1	1	9481.8	12695	20531	19520	17106	15899	15338	15841	6807.1	1	7870.6	8862.8
Q07666-3;Q07666-2;Q07666	KH domain-containing, RNA-binding, signal transduction-associated protein 1	KHDRBS1	sp|Q07666-3|KHDR1_HUMAN Isoform 3 of KH domain-containing, RNA-binding, signal transduction-associated protein 1 OS=Homo sapiens OX=9606 GN=KHDRBS1;sp|Q07666-2|KHDR1_HUMAN Isoform 2 of KH domain-containing, RNA-binding, signal transduction-associated prote	9716.7	6106	1	1	1	1	2727	2963.4	3770	2945.8	3237.3	2919.1	4158.6	4806.5	4116.6	1654.8	1	1	1	3743.6	6379.2	5202.5	10241	9006.8	7939.4	8890	2599.5	1	3900.7	1
Q07955;Q07955-3;Q07955-2	Serine/arginine-rich splicing factor 1	SRSF1	sp|Q07955|SRSF1_HUMAN Serine/arginine-rich splicing factor 1 OS=Homo sapiens OX=9606 GN=SRSF1 PE=1 SV=2;sp|Q07955-3|SRSF1_HUMAN Isoform ASF-3 of Serine/arginine-rich splicing factor 1 OS=Homo sapiens OX=9606 GN=SRSF1;sp|Q07955-2|SRSF1_HUMAN Isoform ASF-2 o	69307	57693	84459	95932	109450	111190	98250	104080	64260	64463	56838	56338	62898	66775	92386	92044	98051	91189	123050	108910	124700	120700	76978	74159	88634	90167	127950	133300	124970	119910
Q08211;Q08211-2	ATP-dependent RNA helicase A	DHX9	sp|Q08211|DHX9_HUMAN ATP-dependent RNA helicase A OS=Homo sapiens OX=9606 GN=DHX9 PE=1 SV=4	1	1	1	1	1	1	1	1	1126.8	1	2559.3	1199.8	4037.7	3470.5	3253	764.05	2005.3	855.89	1	1	61797	47590	4862.3	3671.2	5637.5	6853.3	1	1	5915.5	7052.2
Q08554-2;Q08554	Desmocollin-1	DSC1	sp|Q08554-2|DSC1_HUMAN Isoform 1B of Desmocollin-1 OS=Homo sapiens OX=9606 GN=DSC1;sp|Q08554|DSC1_HUMAN Desmocollin-1 OS=Homo sapiens OX=9606 GN=DSC1 PE=1 SV=2	1	1	1	1	18940	20393	1	1	1	1	1	1	1	1	1	1	1	1	1	1	1	1	1	1	1	1	1	1	1	1
Q08945	FACT complex subunit SSRP1	SSRP1	sp|Q08945|SSRP1_HUMAN FACT complex subunit SSRP1 OS=Homo sapiens OX=9606 GN=SSRP1 PE=1 SV=1	56917	41266	46897	49204	48565	47776	48738	51999	30827	32217	27209	25560	23396	23036	39498	46578	33680	36459	51155	51500	39181	38859	31962	28768	43731	42636	72148	75205	45906	46041
Q09028-3;Q09028;Q09028-4;Q09028-2;Q16576-2	Histone-binding protein RBBP4;Histone-binding protein RBBP7	RBBP4;RBBP7	sp|Q09028-3|RBBP4_HUMAN Isoform 3 of Histone-binding protein RBBP4 OS=Homo sapiens OX=9606 GN=RBBP4;sp|Q09028|RBBP4_HUMAN Histone-binding protein RBBP4 OS=Homo sapiens OX=9606 GN=RBBP4 PE=1 SV=3;sp|Q09028-4|RBBP4_HUMAN Isoform 4 of Histone-binding protein	30395	23443	12630	12636	7642.2	8933.9	14663	14778	12885	12234	12344	12335	14837	15449	15977	18049	13135	12543	17573	12154	21200	16859	14766	15117	21266	20799	11711	13626	13253	13638
Q0VGL1	Ragulator complex protein LAMTOR4;Ragulator complex protein LAMTOR4, N-terminally processed	LAMTOR4	sp|Q0VGL1|LTOR4_HUMAN Ragulator complex protein LAMTOR4 OS=Homo sapiens OX=9606 GN=LAMTOR4 PE=1 SV=1	1	1	1	1	1	1	25020	26987	21983	22801	31693	33746	27521	29013	17451	17246	21630	21214	5817.3	4590.7	3023.5	3348.2	5292	7498.7	7696.8	10729	10159	11663	5215.2	7531.3
Q12769;Q12769-2;Q12769-3	Nuclear pore complex protein Nup160	NUP160	sp|Q12769|NU160_HUMAN Nuclear pore complex protein Nup160 OS=Homo sapiens OX=9606 GN=NUP160 PE=1 SV=3;sp|Q12769-2|NU160_HUMAN Isoform 2 of Nuclear pore complex protein Nup160 OS=Homo sapiens OX=9606 GN=NUP160;sp|Q12769-3|NU160_HUMAN Isoform 3 of Nuclear po	1	1	1	1	1	1	1	1	6684.4	3780.5	2376.6	1	1	2277.1	1	1	1	1	1	1	1	1	1	1	1	1	1	1	1	1
Q12789-3;Q12789	General transcription factor 3C polypeptide 1	GTF3C1	sp|Q12789-3|TF3C1_HUMAN Isoform 2 of General transcription factor 3C polypeptide 1 OS=Homo sapiens OX=9606 GN=GTF3C1;sp|Q12789|TF3C1_HUMAN General transcription factor 3C polypeptide 1 OS=Homo sapiens OX=9606 GN=GTF3C1 PE=1 SV=4	1	1	1	1	1	1	1	1	1	1	1	1	1	1	1	1	1	1	1	1	1	1844.3	1	1	2333	1	1	1875.4	1	1
Q12872;Q12872-2	Splicing factor, suppressor of white-apricot homolog	SFSWAP	sp|Q12872|SFSWA_HUMAN Splicing factor, suppressor of white-apricot homolog OS=Homo sapiens OX=9606 GN=SFSWAP PE=1 SV=3;sp|Q12872-2|SFSWA_HUMAN Isoform 2 of Splicing factor, suppressor of white-apricot homolog OS=Homo sapiens OX=9606 GN=SFSWAP	11578	10180	1	15012	13062	15190	13405	11176	4917.1	5578.7	7854.1	5537.7	11843	12063	21589	21108	11247	7544.4	17458	20368	13337	15930	11174	11023	9558.7	11306	17318	16180	14795	14766
Q12873-2;Q12873;Q12873-3	Chromodomain-helicase-DNA-binding protein 3	CHD3	sp|Q12873-2|CHD3_HUMAN Isoform 2 of Chromodomain-helicase-DNA-binding protein 3 OS=Homo sapiens OX=9606 GN=CHD3;sp|Q12873|CHD3_HUMAN Chromodomain-helicase-DNA-binding protein 3 OS=Homo sapiens OX=9606 GN=CHD3 PE=1 SV=3;sp|Q12873-3|CHD3_HUMAN Isoform 3 of C	1	1	1	1	1	1	1	1	1	1	1	1	1	1	1	1	1	1	1	1	1	1	1	1	1	1	1	1	39973	46995
Q12874	Splicing factor 3A subunit 3	SF3A3	sp|Q12874|SF3A3_HUMAN Splicing factor 3A subunit 3 OS=Homo sapiens OX=9606 GN=SF3A3 PE=1 SV=1	9261	9769.8	6551.6	9601.5	10033	12029	6558.5	6025.1	2463.7	2640.1	6047.3	5422.2	6699.7	6950.5	8127.7	8054.2	6879.5	5651.3	10293	10124	11851	12618	6814.4	7965.5	7994.4	8045	6707	4517.6	9009.8	9972.6
Q12905	Interleukin enhancer-binding factor 2	ILF2	sp|Q12905|ILF2_HUMAN Interleukin enhancer-binding factor 2 OS=Homo sapiens OX=9606 GN=ILF2 PE=1 SV=2	3103.3	1	1	1	1	1	1	1	1511.1	1	1	1	2353.8	1	2370.6	4071.6	4115.1	4745.5	1	1	17579	5793.3	1	1	3461.9	3924.9	1	1	3998.5	1
Q12906-5;Q12906-4;Q12906-2;Q12906-6;Q12906-3;Q12906;Q12906-7	Interleukin enhancer-binding factor 3	ILF3	sp|Q12906-5|ILF3_HUMAN Isoform 5 of Interleukin enhancer-binding factor 3 OS=Homo sapiens OX=9606 GN=ILF3;sp|Q12906-4|ILF3_HUMAN Isoform 4 of Interleukin enhancer-binding factor 3 OS=Homo sapiens OX=9606 GN=ILF3;sp|Q12906-2|ILF3_HUMAN Isoform 2 of Interleu	1	1	1	1	1	1	1	2508	1	1430.5	2456.9	1	2847.2	2284.4	3981.1	5949.1	1	1	1	1	22486	21661	1274.1	938.38	2661.8	6701.2	1	1	4937.8	4708.1
Q12931-2;Q12931	Heat shock protein 75 kDa, mitochondrial	TRAP1	sp|Q12931-2|TRAP1_HUMAN Isoform 2 of Heat shock protein 75 kDa, mitochondrial OS=Homo sapiens OX=9606 GN=TRAP1;sp|Q12931|TRAP1_HUMAN Heat shock protein 75 kDa, mitochondrial OS=Homo sapiens OX=9606 GN=TRAP1 PE=1 SV=3	10361	3388.9	1	1	1	1	1	1	1	1	1	1	1	870.51	1	1	1	1	1	1	2028.2	973.62	2468	1392.1	3027.9	1	3011.9	1	1	1
Q12962	Transcription initiation factor TFIID subunit 10	TAF10	sp|Q12962|TAF10_HUMAN Transcription initiation factor TFIID subunit 10 OS=Homo sapiens OX=9606 GN=TAF10 PE=1 SV=1	15607	15694	4346.9	9165.9	7743.2	11464	6017.8	4760.9	7772.3	6711.4	8722.1	6218.2	9577.2	10908	8226.6	9381.3	5575.3	5948.9	11814	11295	9232.8	9781.7	10998	10745	8038.9	9290.9	7244.8	7557.9	5769.6	4448.3
Q13015	Protein AF1q	MLLT11	sp|Q13015|AF1Q_HUMAN Protein AF1q OS=Homo sapiens OX=9606 GN=MLLT11 PE=1 SV=1	1	1	1	1	1	1	7036.7	9793.4	16410	15622	17345	15716	15240	15213	13599	13911	11689	13029	11019	13548	12278	12203	12536	13179	7458.5	6524.1	6610.3	4462.8	6368.7	7856.6
Q13144	Translation initiation factor eIF-2B subunit epsilon	EIF2B5	sp|Q13144|EI2BE_HUMAN Translation initiation factor eIF-2B subunit epsilon OS=Homo sapiens OX=9606 GN=EIF2B5 PE=1 SV=3	305.33	1	1	1	1	1	68501	15977	134060	40639	21173	16474	10436	12361	1475	2797.7	2932.2	1327.3	717.75	1	745.55	1	1	833.7	932.83	842.49	806.17	1	1	706.44
Q13151	Heterogeneous nuclear ribonucleoprotein A0	HNRNPA0	sp|Q13151|ROA0_HUMAN Heterogeneous nuclear ribonucleoprotein A0 OS=Homo sapiens OX=9606 GN=HNRNPA0 PE=1 SV=1	1	3746.5	1	1	1	1	1	1	3921.8	1	1	2471.6	2481.6	3011.4	3997.8	4116.6	3238.8	4598.6	1	2703.7	13421	10931	4771.7	1	7877.1	7742.7	4845.1	4118	6463	6027.9
Q13185;P83916	Chromobox protein homolog 3	CBX3	sp|Q13185|CBX3_HUMAN Chromobox protein homolog 3 OS=Homo sapiens OX=9606 GN=CBX3 PE=1 SV=4	3186.3	1	1	1	1	1	1	1087.8	1	799.69	4194.8	4397.9	3984.3	3164.2	7161	8811.8	4005.2	4503.3	6049.2	6212	23080	19825	6209.4	5720.6	8195.5	6062.4	1	4921.5	9404.5	10761
Q13206	Probable ATP-dependent RNA helicase DDX10	DDX10	sp|Q13206|DDX10_HUMAN Probable ATP-dependent RNA helicase DDX10 OS=Homo sapiens OX=9606 GN=DDX10 PE=1 SV=2	1	1	1	1	1	1	33522	33971	34300	31747	34153	36013	27758	26500	22973	24775	28763	27844	20820	20016	23644	25512	20883	21259	25377	24810	29672	30249	24752	24715
Q13242	Serine/arginine-rich splicing factor 9	SRSF9	sp|Q13242|SRSF9_HUMAN Serine/arginine-rich splicing factor 9 OS=Homo sapiens OX=9606 GN=SRSF9 PE=1 SV=1	1134.1	1	1	1	1	1	2851.7	1	1	1	1491.2	1	2603.6	2229.2	5283.2	8545.6	1	2624.5	1	2103.6	16487	21452	1	2033.3	3443.3	3594.2	1843.8	1	11188	11881
Q13243;Q13243-3;Q13243-2	Serine/arginine-rich splicing factor 5	SRSF5	sp|Q13243|SRSF5_HUMAN Serine/arginine-rich splicing factor 5 OS=Homo sapiens OX=9606 GN=SRSF5 PE=1 SV=1;sp|Q13243-3|SRSF5_HUMAN Isoform SRP40-4 of Serine/arginine-rich splicing factor 5 OS=Homo sapiens OX=9606 GN=SRSF5	30580	29455	49845	47962	57132	56766	42611	46262	27134	24890	24293	25903	26172	26322	46424	53293	45727	47769	59184	51900	52051	48901	33513	31894	35961	37267	57531	63679	54413	50880
Q13247-3;Q13247;Q08170	Serine/arginine-rich splicing factor 6	SRSF6	sp|Q13247-3|SRSF6_HUMAN Isoform SRP55-3 of Serine/arginine-rich splicing factor 6 OS=Homo sapiens OX=9606 GN=SRSF6;sp|Q13247|SRSF6_HUMAN Serine/arginine-rich splicing factor 6 OS=Homo sapiens OX=9606 GN=SRSF6 PE=1 SV=2	4292.8	5049.8	5516.6	7177.4	9114	11020	10204	10711	5484.2	1	1	6128.5	6622.5	6289.6	9637.2	9778.8	9295.4	1	10798	9709.3	20744	22761	6735.8	6402.5	10389	10834	9667.2	8699.3	14240	14358
Q13263;Q13263-2	Transcription intermediary factor 1-beta	TRIM28	sp|Q13263|TIF1B_HUMAN Transcription intermediary factor 1-beta OS=Homo sapiens OX=9606 GN=TRIM28 PE=1 SV=5;sp|Q13263-2|TIF1B_HUMAN Isoform 2 of Transcription intermediary factor 1-beta OS=Homo sapiens OX=9606 GN=TRIM28	27972	21645	12283	13114	3038.7	12627	21238	23368	23763	22670	19327	20128	34503	36629	29706	34597	24819	30991	28899	24969	29675	30418	29298	28304	35591	33465	31582	31120	30264	31092
Q13283	Ras GTPase-activating protein-binding protein 1	G3BP1	sp|Q13283|G3BP1_HUMAN Ras GTPase-activating protein-binding protein 1 OS=Homo sapiens OX=9606 GN=G3BP1 PE=1 SV=1	1	3259.1	1	1	1	1	1	1	1	1	3049.3	1	1	2408.7	1	1	1	1	1	1	1	1	1	1	1	1	1	1	1	1
Q13347	Eukaryotic translation initiation factor 3 subunit I	EIF3I	sp|Q13347|EIF3I_HUMAN Eukaryotic translation initiation factor 3 subunit I OS=Homo sapiens OX=9606 GN=EIF3I PE=1 SV=1	18006	15992	13975	17818	10412	12947	13074	13582	11997	12627	13875	13753	15789	16337	14955	14135	15717	14441	13260	13122	15899	16350	14571	15027	12999	12408	10561	10020	13434	13799
Q13418;Q13418-2;Q13418-3	Integrin-linked protein kinase	ILK	sp|Q13418|ILK_HUMAN Integrin-linked protein kinase OS=Homo sapiens OX=9606 GN=ILK PE=1 SV=2;sp|Q13418-2|ILK_HUMAN Isoform 2 of Integrin-linked protein kinase OS=Homo sapiens OX=9606 GN=ILK;sp|Q13418-3|ILK_HUMAN Isoform 3 of Integrin-linked protein kinase O	1	1	1	1	1	1	1	1	5240.1	8694.4	1	1035.7	2694.5	2869.7	2429.1	5035.2	1	1967.5	1	1	1	1	1	1	1	1	1	1	1	1
Q13427-2;Q13427	Peptidyl-prolyl cis-trans isomerase G	PPIG	sp|Q13427-2|PPIG_HUMAN Isoform 2 of Peptidyl-prolyl cis-trans isomerase G OS=Homo sapiens OX=9606 GN=PPIG;sp|Q13427|PPIG_HUMAN Peptidyl-prolyl cis-trans isomerase G OS=Homo sapiens OX=9606 GN=PPIG PE=1 SV=2	14178	10024	10231	13409	14021	13946	11296	12748	9534.8	5697.2	6659.6	8022.7	7054.8	6976	10511	8934.9	10902	9638	13304	13907	13324	12675	7729	8634.5	5565	4955.7	12577	13466	12325	14245
Q13428-2;Q13428-8;Q13428;Q13428-3;Q13428-4;Q13428-6;Q13428-7;Q13428-5	Treacle protein	TCOF1	sp|Q13428-2|TCOF_HUMAN Isoform 2 of Treacle protein OS=Homo sapiens OX=9606 GN=TCOF1;sp|Q13428-8|TCOF_HUMAN Isoform 8 of Treacle protein OS=Homo sapiens OX=9606 GN=TCOF1;sp|Q13428|TCOF_HUMAN Treacle protein OS=Homo sapiens OX=9606 GN=TCOF1 PE=1 SV=3;sp|Q13	106590	97712	156270	162050	152420	159760	114680	129370	79563	82825	69179	73758	101680	107950	162690	172050	128930	110040	191320	172720	123850	126750	120900	126960	74706	81570	145970	157290	126950	125320
Q13435	Splicing factor 3B subunit 2	SF3B2	sp|Q13435|SF3B2_HUMAN Splicing factor 3B subunit 2 OS=Homo sapiens OX=9606 GN=SF3B2 PE=1 SV=2	24725	22234	27521	30291	32289	31250	12516	13196	6729.3	6945.6	14086	15171	14773	14820	20712	20659	17756	13334	21174	21658	23549	25372	16385	18030	15835	16006	14457	15106	23332	22497
Q13442	28 kDa heat- and acid-stable phosphoprotein	PDAP1	sp|Q13442|HAP28_HUMAN 28 kDa heat- and acid-stable phosphoprotein OS=Homo sapiens OX=9606 GN=PDAP1 PE=1 SV=1	8653.6	5779.9	7539.5	11408	9217.9	10686	10315	9138.2	5947.2	6397	4786.6	4173.9	4854.1	5818.6	9123.9	11013	7801.7	1	16834	11384	7537.4	8229.1	6026.6	5610.8	6115.3	1	11318	11604	9354.2	8362.4
Q13501;Q13501-2	Sequestosome-1	SQSTM1	sp|Q13501|SQSTM_HUMAN Sequestosome-1 OS=Homo sapiens OX=9606 GN=SQSTM1 PE=1 SV=1;sp|Q13501-2|SQSTM_HUMAN Isoform 2 of Sequestosome-1 OS=Homo sapiens OX=9606 GN=SQSTM1	1	1	1	1	1	1	92610	88097	85584	85434	72669	80723	75191	73793	44527	52225	60932	61264	10655	8494.7	9492.8	9030.6	9427.8	9621.8	18726	20125	27268	25907	14653	13277
Q13509;Q13509-2	Tubulin beta-3 chain	TUBB3	sp|Q13509|TBB3_HUMAN Tubulin beta-3 chain OS=Homo sapiens OX=9606 GN=TUBB3 PE=1 SV=2;sp|Q13509-2|TBB3_HUMAN Isoform 2 of Tubulin beta-3 chain OS=Homo sapiens OX=9606 GN=TUBB3	1	1	1	1	1	1	1	1	1	17699	1	1	20232	1	1	1	1	1	1	1	1	1	1	1	19187	1	1	18992	1	1
Q13523	Serine/threonine-protein kinase PRP4 homolog	PRPF4B	sp|Q13523|PRP4B_HUMAN Serine/threonine-protein kinase PRP4 homolog OS=Homo sapiens OX=9606 GN=PRPF4B PE=1 SV=3	15961	20608	30692	33726	31705	33559	22020	24431	14445	14106	15659	16589	20417	20595	26898	32871	25078	21152	38407	29400	23417	23103	21598	22083	14806	15151	24950	26644	23214	24579
Q13526	Peptidyl-prolyl cis-trans isomerase NIMA-interacting 1	PIN1	sp|Q13526|PIN1_HUMAN Peptidyl-prolyl cis-trans isomerase NIMA-interacting 1 OS=Homo sapiens OX=9606 GN=PIN1 PE=1 SV=1	1	1	1	1	1	1	1	1	5773.6	5006	7129.3	5974.4	4039.8	4863.4	1	1	1	1	1	1	5995.4	4557	5762.4	1	1	1	1	1	1	1
Q13561;Q13561-3;Q13561-2	Dynactin subunit 2	DCTN2	sp|Q13561|DCTN2_HUMAN Dynactin subunit 2 OS=Homo sapiens OX=9606 GN=DCTN2 PE=1 SV=4;sp|Q13561-3|DCTN2_HUMAN Isoform 3 of Dynactin subunit 2 OS=Homo sapiens OX=9606 GN=DCTN2;sp|Q13561-2|DCTN2_HUMAN Isoform 2 of Dynactin subunit 2 OS=Homo sapiens OX=9606 GN=	4071.3	1	1	1269.5	1	1	1	1	3137.3	1	5339.5	3855.6	4574.5	6173.7	3305.2	3876.1	1	1	1	1	5213.5	5138	3040.7	3376.4	3652.8	3892.8	2052.1	1	2614.1	2849.3
Q13595-2;Q13595-4;Q13595-3;Q13595	Transformer-2 protein homolog alpha	TRA2A	sp|Q13595-2|TRA2A_HUMAN Isoform Short of Transformer-2 protein homolog alpha OS=Homo sapiens OX=9606 GN=TRA2A;sp|Q13595-4|TRA2A_HUMAN Isoform 4 of Transformer-2 protein homolog alpha OS=Homo sapiens OX=9606 GN=TRA2A;sp|Q13595-3|TRA2A_HUMAN Isoform 3 of Tra	1	1	1	1	1	1	1	1	1	1	1	1	1	1	1	1	1	2412.5	1	1	17111	14807	1	1	1	1	1	1	4826.3	4885.4
Q13618-3;Q13618-2;Q13618	Cullin-3	CUL3	sp|Q13618-3|CUL3_HUMAN Isoform 3 of Cullin-3 OS=Homo sapiens OX=9606 GN=CUL3;sp|Q13618-2|CUL3_HUMAN Isoform 2 of Cullin-3 OS=Homo sapiens OX=9606 GN=CUL3;sp|Q13618|CUL3_HUMAN Cullin-3 OS=Homo sapiens OX=9606 GN=CUL3 PE=1 SV=2	1	1	1	1	1	1	5534.5	9398.9	10990	9901.3	13302	11206	7617.1	6093.2	8665.6	6691.1	6102.3	10437	1	3057.8	1	1331.4	1	1	1	1	2445.6	1	1	1
Q13765;E9PAV3-2;E9PAV3;Q9BZK3	Nascent polypeptide-associated complex subunit alpha;Nascent polypeptide-associated complex subunit alpha, muscle-specific form	NACA	sp|Q13765|NACA_HUMAN Nascent polypeptide-associated complex subunit alpha OS=Homo sapiens OX=9606 GN=NACA PE=1 SV=1;sp|E9PAV3-2|NACAM_HUMAN Isoform skNAC-2 of Nascent polypeptide-associated complex subunit alpha, muscle-specific form OS=Homo sapiens OX=960	32012	28893	10901	12874	9939.4	10972	11126	9980.3	12518	12318	12142	13344	14970	15166	16004	17184	10666	12390	18201	18771	17922	18368	22453	23517	29409	27617	17199	20086	14405	15155
Q13813-3;Q13813;Q13813-2	Spectrin alpha chain, non-erythrocytic 1	SPTAN1	sp|Q13813-3|SPTN1_HUMAN Isoform 3 of Spectrin alpha chain, non-erythrocytic 1 OS=Homo sapiens OX=9606 GN=SPTAN1;sp|Q13813|SPTN1_HUMAN Spectrin alpha chain, non-erythrocytic 1 OS=Homo sapiens OX=9606 GN=SPTAN1 PE=1 SV=3;sp|Q13813-2|SPTN1_HUMAN Isoform 2 of	2313.5	4690.7	1	1	1	1715.4	10273	10215	10892	8839	12702	13282	15988	15348	19203	19783	16359	17468	5844	8228.8	22898	21664	9573.3	8327.1	18641	18749	8774.6	6368.2	21985	24510
Q13838-2;Q13838;O00148	Spliceosome RNA helicase DDX39B;ATP-dependent RNA helicase DDX39A	DDX39B;DDX39A	sp|Q13838-2|DX39B_HUMAN Isoform 2 of Spliceosome RNA helicase DDX39B OS=Homo sapiens OX=9606 GN=DDX39B;sp|Q13838|DX39B_HUMAN Spliceosome RNA helicase DDX39B OS=Homo sapiens OX=9606 GN=DDX39B PE=1 SV=1;sp|O00148|DX39A_HUMAN ATP-dependent RNA helicase DDX39A	14518	13668	1	1	1	1	1	2431	3899.2	1	3343.7	3144.6	4821.2	7010.7	5293.8	4786.7	4030.4	3603.5	1	2110.6	8290.3	8852.5	7995	7086.9	8331	9300.4	1	1	3078.6	3024.5
Q13885	Tubulin beta-2A chain	TUBB2A	sp|Q13885|TBB2A_HUMAN Tubulin beta-2A chain OS=Homo sapiens OX=9606 GN=TUBB2A PE=1 SV=1	9485.8	7242.8	1	1	1	1	38058	46887	41950	43543	38933	38939	42526	40995	44104	48654	34857	41704	40589	40939	32041	36769	27531	23760	20639	16873	25619	28228	19244	20737
Q14011;Q14011-2	Cold-inducible RNA-binding protein	CIRBP	sp|Q14011|CIRBP_HUMAN Cold-inducible RNA-binding protein OS=Homo sapiens OX=9606 GN=CIRBP PE=1 SV=1;sp|Q14011-2|CIRBP_HUMAN Isoform 2 of Cold-inducible RNA-binding protein OS=Homo sapiens OX=9606 GN=CIRBP	9278.5	6563.2	10794	13722	14623	16503	9361.9	10174	8344.1	7318.4	9434.6	8983.4	7013.8	6731.7	8200.3	8965.7	8535.6	5175	10134	8869	7186.5	7313.7	7528	7123.9	8749.8	7601.4	7270	8849.4	8859.9	8050.4
Q14103-4;Q14103-3;Q14103-2;Q14103	Heterogeneous nuclear ribonucleoprotein D0	HNRNPD	sp|Q14103-4|HNRPD_HUMAN Isoform 4 of Heterogeneous nuclear ribonucleoprotein D0 OS=Homo sapiens OX=9606 GN=HNRNPD;sp|Q14103-3|HNRPD_HUMAN Isoform 3 of Heterogeneous nuclear ribonucleoprotein D0 OS=Homo sapiens OX=9606 GN=HNRNPD;sp|Q14103-2|HNRPD_HUMAN Isof	10719	11411	1	3050.5	1	1	1	1	1	1	1964.2	2850.8	4871.1	3167.5	2921.2	2790.3	3233.2	1	1	3255.3	9852.3	14515	3419.7	4298.1	10189	5228.2	1	1	4616	4861.1
Q14126	Desmoglein-2	DSG2	sp|Q14126|DSG2_HUMAN Desmoglein-2 OS=Homo sapiens OX=9606 GN=DSG2 PE=1 SV=2	1	1	1	1	1	1	133610	136020	128020	126440	103860	105850	135260	136650	113440	123980	111720	118210	67953	59940	70887	70984	67771	65443	97133	95807	103890	104830	98595	94799
Q14152-2;Q14152	Eukaryotic translation initiation factor 3 subunit A	EIF3A	sp|Q14152-2|EIF3A_HUMAN Isoform 2 of Eukaryotic translation initiation factor 3 subunit A OS=Homo sapiens OX=9606 GN=EIF3A;sp|Q14152|EIF3A_HUMAN Eukaryotic translation initiation factor 3 subunit A OS=Homo sapiens OX=9606 GN=EIF3A PE=1 SV=1	18532	15945	18102	18438	17602	18023	9100.9	8454.7	8923.3	8676.2	11857	11157	12571	13913	12204	15399	12642	13346	12380	12546	12680	12499	11809	10663	10411	9954.9	9102.7	8782.4	11734	11982
Q14156;Q14156-2;Q14156-3	Protein EFR3 homolog A	EFR3A	sp|Q14156|EFR3A_HUMAN Protein EFR3 homolog A OS=Homo sapiens OX=9606 GN=EFR3A PE=1 SV=2;sp|Q14156-2|EFR3A_HUMAN Isoform 2 of Protein EFR3 homolog A OS=Homo sapiens OX=9606 GN=EFR3A;sp|Q14156-3|EFR3A_HUMAN Isoform 3 of Protein EFR3 homolog A OS=Homo sapiens	1	1	1	1	1	1	7066.2	7347.9	8544.9	6314.2	6654.2	4676.3	9986.1	8236.6	5250.2	5263.9	6685.2	4822.5	1	1	3264.6	3861.1	1	2338.3	4333.5	4534.8	3424.4	3451.1	2290.2	4893.4
Q14160;Q14160-3;Q14160-2;Q9BTT6-2;Q9BTT6	Protein scribble homolog	SCRIB	sp|Q14160|SCRIB_HUMAN Protein scribble homolog OS=Homo sapiens OX=9606 GN=SCRIB PE=1 SV=4;sp|Q14160-3|SCRIB_HUMAN Isoform 3 of Protein scribble homolog OS=Homo sapiens OX=9606 GN=SCRIB;sp|Q14160-2|SCRIB_HUMAN Isoform 2 of Protein scribble homolog OS=Homo s	1	1	1	1	1	1	3301.3	1	4649.4	3075.8	3673.7	4053.7	11248	7857.6	7308.9	6655.2	3095.2	1	1	1	2351.8	2415.3	1	1894.5	2386.4	3746	1	1	1	1
Q14204	Cytoplasmic dynein 1 heavy chain 1	DYNC1H1	sp|Q14204|DYHC1_HUMAN Cytoplasmic dynein 1 heavy chain 1 OS=Homo sapiens OX=9606 GN=DYNC1H1 PE=1 SV=5	3487	2183.8	1	1	1	1	1159.6	5143	5544.2	5684.9	8126.8	7975.3	7366.7	9570.9	6859.2	4464.4	2172.9	3654.4	3417.8	1	6376.2	6789.1	5938.7	6115.6	5659.5	6076.5	1500.1	2659	3037.6	4352.6
Q14232;Q14232-2	Translation initiation factor eIF-2B subunit alpha	EIF2B1	sp|Q14232|EI2BA_HUMAN Translation initiation factor eIF-2B subunit alpha OS=Homo sapiens OX=9606 GN=EIF2B1 PE=1 SV=1;sp|Q14232-2|EI2BA_HUMAN Isoform 2 of Translation initiation factor eIF-2B subunit alpha OS=Homo sapiens OX=9606 GN=EIF2B1	1	1	1	1	1	1	16840	17153	57514	54101	29834	26334	15077	15694	5236.9	5695	4655.4	6705.5	1	1	1	1	1	1	1	1	1	1	1	1
Q14241	Transcription elongation factor B polypeptide 3	TCEB3	sp|Q14241|ELOA1_HUMAN Elongin-A OS=Homo sapiens OX=9606 GN=ELOA PE=1 SV=2	4966.1	6366.4	7912.4	11208	10262	10723	7613.4	8577.4	2674.4	1	1	1955.7	3333.1	3160.5	10333	6628.1	8032.2	6257.6	8303.1	13931	9016.9	9308.6	4843.2	5741.9	1	2026.8	8671.4	9616.6	6020.8	6365.1
Q14247-3;Q14247;Q14247-2	Src substrate cortactin	CTTN	sp|Q14247-3|SRC8_HUMAN Isoform 3 of Src substrate cortactin OS=Homo sapiens OX=9606 GN=CTTN;sp|Q14247|SRC8_HUMAN Src substrate cortactin OS=Homo sapiens OX=9606 GN=CTTN PE=1 SV=2;sp|Q14247-2|SRC8_HUMAN Isoform 2 of Src substrate cortactin OS=Homo sapiens O	3651.1	1	1	3022.4	1	1	1	2249.8	1973.7	1	1667.9	1062.8	3132.8	6753.8	2394.4	1	1	2078.6	1	2486.7	1643.8	2140.7	3383.7	4328.9	1546.6	2798.4	1363.8	1	2143.5	3572.3
Q14254	Flotillin-2	FLOT2	sp|Q14254|FLOT2_HUMAN Flotillin-2 OS=Homo sapiens OX=9606 GN=FLOT2 PE=1 SV=2	509.58	423.68	1	1	1	1	28988	31590	27333	23708	26491	28907	29608	31559	22860	26314	23699	23675	2247.4	4336.2	4830.6	4484.5	2955.4	1701.7	8326.5	10590	9139.7	9433.2	7456.8	7816.5
Q14257;Q14257-2	Reticulocalbin-2	RCN2	sp|Q14257|RCN2_HUMAN Reticulocalbin-2 OS=Homo sapiens OX=9606 GN=RCN2 PE=1 SV=1;sp|Q14257-2|RCN2_HUMAN Isoform 2 of Reticulocalbin-2 OS=Homo sapiens OX=9606 GN=RCN2	17009	19401	19275	20001	17701	15416	50135	46282	53993	51558	47111	45223	45295	46103	47845	59060	41104	47396	54928	43400	43914	40464	40107	36214	27079	26591	39193	41859	34301	35229
Q14318;Q14318-2	Peptidyl-prolyl cis-trans isomerase FKBP8	FKBP8	sp|Q14318|FKBP8_HUMAN Peptidyl-prolyl cis-trans isomerase FKBP8 OS=Homo sapiens OX=9606 GN=FKBP8 PE=1 SV=2;sp|Q14318-2|FKBP8_HUMAN Isoform 2 of Peptidyl-prolyl cis-trans isomerase FKBP8 OS=Homo sapiens OX=9606 GN=FKBP8	1	1	1	1	1	1	1	1	1	1584	1	1	1851	1979.3	1481.7	1	1	1	1	1597.2	4061.1	1617.1	2480.5	1671.6	1	1	1	1	1	1
Q14331	Protein FRG1	FRG1	sp|Q14331|FRG1_HUMAN Protein FRG1 OS=Homo sapiens OX=9606 GN=FRG1 PE=1 SV=1	81444	76840	94009	97147	92408	95732	78659	77540	59816	64573	50474	51480	45400	45245	113560	109300	69043	74481	85784	100220	69122	71032	65823	66152	70324	72256	82420	83610	74732	73977
Q14344-2;Q14344	Guanine nucleotide-binding protein subunit alpha-13	GNA13	sp|Q14344-2|GNA13_HUMAN Isoform 2 of Guanine nucleotide-binding protein subunit alpha-13 OS=Homo sapiens OX=9606 GN=GNA13;sp|Q14344|GNA13_HUMAN Guanine nucleotide-binding protein subunit alpha-13 OS=Homo sapiens OX=9606 GN=GNA13 PE=1 SV=2	1	1	1	1	1	1	1	1	1	1	1	1	3852.4	3512.7	2401	4769	1	1	1	1274.2	1	991.84	1	1640.1	2153.7	4375.8	1	2562	1	870.98
Q14498-2;Q14498;Q14498-3;Q86U06-4;Q86U06-5;Q86U06-2;Q86U06;Q86U06-3	RNA-binding protein 39	RBM39	sp|Q14498-2|RBM39_HUMAN Isoform 2 of RNA-binding protein 39 OS=Homo sapiens OX=9606 GN=RBM39;sp|Q14498|RBM39_HUMAN RNA-binding protein 39 OS=Homo sapiens OX=9606 GN=RBM39 PE=1 SV=2;sp|Q14498-3|RBM39_HUMAN Isoform 3 of RNA-binding protein 39 OS=Homo sapiens	1590700	1488600	3445600	3539100	3353300	3335800	2667200	2538100	1276300	1365400	1436700	1342800	1100300	1060300	2073600	2061400	1790400	1917100	1531600	1608300	1385800	1345400	1394700	1365100	1449100	1350100	2447600	2496100	2552000	2510600
Q14558;Q14558-2	Phosphoribosyl pyrophosphate synthase-associated protein 1	PRPSAP1	sp|Q14558|KPRA_HUMAN Phosphoribosyl pyrophosphate synthase-associated protein 1 OS=Homo sapiens OX=9606 GN=PRPSAP1 PE=1 SV=2;sp|Q14558-2|KPRA_HUMAN Isoform 2 of Phosphoribosyl pyrophosphate synthase-associated protein 1 OS=Homo sapiens OX=9606 GN=PRPSAP1	34847	33076	22365	29014	13292	14974	1	1	1	1	164.16	178.19	241.88	411.63	547.27	401.08	1	1	16668	15018	21060	18598	26978	22260	2684.8	2255.7	1982.3	2474.1	4539.4	5170.4
Q14562	ATP-dependent RNA helicase DHX8	DHX8	sp|Q14562|DHX8_HUMAN ATP-dependent RNA helicase DHX8 OS=Homo sapiens OX=9606 GN=DHX8 PE=1 SV=1	50305	42943	59331	64020	67815	69906	46368	46076	34612	34139	29667	29360	36501	37787	52702	60773	33230	35436	64617	55834	42324	42969	37174	35000	37960	40245	57259	60401	48502	46259
Q14566	DNA replication licensing factor MCM6	MCM6	sp|Q14566|MCM6_HUMAN DNA replication licensing factor MCM6 OS=Homo sapiens OX=9606 GN=MCM6 PE=1 SV=1	1	1	1	1	1	1	1	1	1	1	1	863.49	1	1467.6	1	1	1	1	1	1	4401.4	1378.3	1	1138.6	1	1	1	1	1	1
Q14684-2;Q14684	Ribosomal RNA processing protein 1 homolog B	RRP1B	sp|Q14684-2|RRP1B_HUMAN Isoform 2 of Ribosomal RNA processing protein 1 homolog B OS=Homo sapiens OX=9606 GN=RRP1B;sp|Q14684|RRP1B_HUMAN Ribosomal RNA processing protein 1 homolog B OS=Homo sapiens OX=9606 GN=RRP1B PE=1 SV=3	1	1	1	1	1	1	1	1	1	1	1	1	1	1	1	1	1	1	1	1	1	1	1	1	1	1	1	1	1	1
Q14692	Ribosome biogenesis protein BMS1 homolog	BMS1	sp|Q14692|BMS1_HUMAN Ribosome biogenesis protein BMS1 homolog OS=Homo sapiens OX=9606 GN=BMS1 PE=1 SV=1	7773.9	1	1	6040.7	9438.7	7536.2	6064.3	3479.9	8488.8	7023.4	6263.4	5488.1	8730.1	11737	7637.7	12913	3881.4	4485.6	9337.7	15146	19722	18440	11285	9595.8	9548.5	14968	13490	13371	9666.1	14610
Q14697;Q14697-2	Neutral alpha-glucosidase AB	GANAB	sp|Q14697|GANAB_HUMAN Neutral alpha-glucosidase AB OS=Homo sapiens OX=9606 GN=GANAB PE=1 SV=3;sp|Q14697-2|GANAB_HUMAN Isoform 2 of Neutral alpha-glucosidase AB OS=Homo sapiens OX=9606 GN=GANAB	4948.7	8032.4	1	1	1	1	1	1	2828.8	1	5096.6	3966.3	6219.3	6904.7	1	1	2228.6	3845.5	1	1	4214.2	1	4790.2	5750.2	6879.1	8014.4	1	1	1	1
Q14766;Q14766-4;Q14766-3;Q14766-2;Q14766-5	Latent-transforming growth factor beta-binding protein 1	LTBP1	sp|Q14766|LTBP1_HUMAN Latent-transforming growth factor beta-binding protein 1 OS=Homo sapiens OX=9606 GN=LTBP1 PE=1 SV=4;sp|Q14766-4|LTBP1_HUMAN Isoform 4 of Latent-transforming growth factor beta-binding protein 1 OS=Homo sapiens OX=9606 GN=LTBP1;sp|Q147	20537	19725	16824	25434	16845	19901	10841	10587	6075.2	5352.2	12272	12112	11611	11747	14914	11569	10973	12009	12644	16086	15451	17922	12663	12338	6513	7088.7	10292	10132	18457	18958
Q14974;Q14974-2	Importin subunit beta-1	KPNB1	sp|Q14974|IMB1_HUMAN Importin subunit beta-1 OS=Homo sapiens OX=9606 GN=KPNB1 PE=1 SV=2;sp|Q14974-2|IMB1_HUMAN Isoform 2 of Importin subunit beta-1 OS=Homo sapiens OX=9606 GN=KPNB1	4924.9	2598.3	1	1	1	1	79091	86587	132720	128540	72176	70568	43316	43688	20338	18770	28282	28883	3864.9	3195.8	4124.1	4541.1	5143.7	5358.5	8816.9	7268	5376.1	4487.1	2877.2	2503.7
Q14978;Q14978-3;Q14978-2	Nucleolar and coiled-body phosphoprotein 1	NOLC1	sp|Q14978|NOLC1_HUMAN Nucleolar and coiled-body phosphoprotein 1 OS=Homo sapiens OX=9606 GN=NOLC1 PE=1 SV=2;sp|Q14978-3|NOLC1_HUMAN Isoform 3 of Nucleolar and coiled-body phosphoprotein 1 OS=Homo sapiens OX=9606 GN=NOLC1;sp|Q14978-2|NOLC1_HUMAN Isoform Bet	48429	42215	59094	70126	68788	74383	53173	45985	28868	28908	20734	17871	29840	29749	68422	72916	49043	43785	91137	73956	51373	53024	46774	47567	32210	31900	60213	61524	54198	48734
Q15008;Q15008-4;Q15008-3;Q15008-2	26S proteasome non-ATPase regulatory subunit 6	PSMD6	sp|Q15008|PSMD6_HUMAN 26S proteasome non-ATPase regulatory subunit 6 OS=Homo sapiens OX=9606 GN=PSMD6 PE=1 SV=1;sp|Q15008-4|PSMD6_HUMAN Isoform 4 of 26S proteasome non-ATPase regulatory subunit 6 OS=Homo sapiens OX=9606 GN=PSMD6;sp|Q15008-3|PSMD6_HUMAN Iso	92547	53415	37978	39201	38659	44586	62248	61263	39287	32764	40096	42485	43659	49947	41798	34395	55820	40308	24209	42293	31570	32831	62545	21772	46586	48732	55569	59913	60269	60911
Q15029-2;Q15029-3;Q15029	116 kDa U5 small nuclear ribonucleoprotein component	EFTUD2	sp|Q15029-2|U5S1_HUMAN Isoform 2 of 116 kDa U5 small nuclear ribonucleoprotein component OS=Homo sapiens OX=9606 GN=EFTUD2;sp|Q15029-3|U5S1_HUMAN Isoform 3 of 116 kDa U5 small nuclear ribonucleoprotein component OS=Homo sapiens OX=9606 GN=EFTUD2;sp|Q15029|	14035	14994	9004.4	9663	8156	13091	8161.8	9197.9	7832.2	5184.5	14781	14381	12315	13099	15124	15152	10435	10025	17702	17071	26156	24842	11783	13232	17961	17263	13179	11599	16228	16784
Q15046;Q15046-2	Lysine--tRNA ligase	KARS	sp|Q15046|SYK_HUMAN Lysine--tRNA ligase OS=Homo sapiens OX=9606 GN=KARS1 PE=1 SV=3;sp|Q15046-2|SYK_HUMAN Isoform Mitochondrial of Lysine--tRNA ligase OS=Homo sapiens OX=9606 GN=KARS1	3108.1	4105.4	1	1	1	1	1	3220	5002	2188.5	8075	4771.9	6032.8	5319.6	3243.1	3136.7	4240.3	2174.7	1	4385.8	2348.6	2904.2	5182.9	4484.1	2514.7	5898.7	4205.9	6480.1	1	1784.6
Q15056-2;Q15056	Eukaryotic translation initiation factor 4H	EIF4H	sp|Q15056-2|IF4H_HUMAN Isoform Short of Eukaryotic translation initiation factor 4H OS=Homo sapiens OX=9606 GN=EIF4H;sp|Q15056|IF4H_HUMAN Eukaryotic translation initiation factor 4H OS=Homo sapiens OX=9606 GN=EIF4H PE=1 SV=5	16476	12553	1	1	1	1	1	1	1	1	1	1	1	2310.6	1	1	1	1	1	1	1	1	1967.8	1988.2	9324.8	8371.9	1	1	1	1
Q15084-3;Q15084;Q15084-4;Q15084-5;Q15084-2	Protein disulfide-isomerase A6	PDIA6	sp|Q15084-3|PDIA6_HUMAN Isoform 3 of Protein disulfide-isomerase A6 OS=Homo sapiens OX=9606 GN=PDIA6;sp|Q15084|PDIA6_HUMAN Protein disulfide-isomerase A6 OS=Homo sapiens OX=9606 GN=PDIA6 PE=1 SV=1;sp|Q15084-4|PDIA6_HUMAN Isoform 4 of Protein disulfide-isom	9819.9	13141	1	10061	1	7035.9	7834.5	9343.5	8094.8	10099	13784	12265	11684	11251	14098	14633	9386	12075	10489	12215	11705	9802.7	12880	13936	14247	16758	8436.5	9536.7	10384	11075
Q15181	Inorganic pyrophosphatase	PPA1	sp|Q15181|IPYR_HUMAN Inorganic pyrophosphatase OS=Homo sapiens OX=9606 GN=PPA1 PE=1 SV=2	30647	30230	1	1	1	1	1	3077	5755.5	6050.3	9201.3	15145	16996	13584	7634.7	3078.4	8657.6	10426	1	9829.9	12308	12462	22640	15252	17871	21510	12164	10287	7887.4	1
Q15185-3;Q15185-4;Q15185;Q15185-2	Prostaglandin E synthase 3	PTGES3	sp|Q15185-3|TEBP_HUMAN Isoform 3 of Prostaglandin E synthase 3 OS=Homo sapiens OX=9606 GN=PTGES3;sp|Q15185-4|TEBP_HUMAN Isoform 4 of Prostaglandin E synthase 3 OS=Homo sapiens OX=9606 GN=PTGES3;sp|Q15185|TEBP_HUMAN Prostaglandin E synthase 3 OS=Homo sapien	29213	28464	1	1	1	1	1	3201.9	5954.4	9889.9	9657.9	9109.2	11203	10390	1974.9	1	2754.9	7891.5	1	4883.9	5758	7808.6	15110	12851	17118	16784	1	3355.6	1	1
Q15208	Serine/threonine-protein kinase 38	STK38	sp|Q15208|STK38_HUMAN Serine/threonine-protein kinase 38 OS=Homo sapiens OX=9606 GN=STK38 PE=1 SV=1	934730	877580	959380	942860	937710	851120	581280	595490	443990	442230	668850	683740	695500	687590	814080	696420	1014800	1034100	715270	878930	803010	799870	999150	1025000	998870	994690	1337800	1379800	1504700	1455500
Q15233;Q15233-2	Non-POU domain-containing octamer-binding protein	NONO	sp|Q15233|NONO_HUMAN Non-POU domain-containing octamer-binding protein OS=Homo sapiens OX=9606 GN=NONO PE=1 SV=4;sp|Q15233-2|NONO_HUMAN Isoform 2 of Non-POU domain-containing octamer-binding protein OS=Homo sapiens OX=9606 GN=NONO	50848	42860	46696	48409	40992	44765	37277	36713	32873	30879	29378	28548	49554	51490	40317	33950	34264	29929	35981	37757	49173	47103	34886	35885	31966	32986	27266	29174	36007	36603
Q15286	Ras-related protein Rab-35	RAB35	sp|Q15286|RAB35_HUMAN Ras-related protein Rab-35 OS=Homo sapiens OX=9606 GN=RAB35 PE=1 SV=1	1	1	1	1	1	1	1	1	9694.2	8418.3	4975.4	5186.3	4678	5599.3	3958.8	4747.4	1	3961.3	1	1411.5	2886.7	1	1	1	1	2071.6	1	1	1	1
Q15287-3;Q15287-2;Q15287	RNA-binding protein with serine-rich domain 1	RNPS1	sp|Q15287-3|RNPS1_HUMAN Isoform 3 of RNA-binding protein with serine-rich domain 1 OS=Homo sapiens OX=9606 GN=RNPS1;sp|Q15287-2|RNPS1_HUMAN Isoform 2 of RNA-binding protein with serine-rich domain 1 OS=Homo sapiens OX=9606 GN=RNPS1;sp|Q15287|RNPS1_HUMAN RN	33491	35430	44148	53818	52159	44653	34864	36871	30049	29448	31431	32120	22761	22869	33160	35624	26566	30154	44445	53587	49623	50085	35218	34769	28163	28027	43376	46502	41346	40943
Q15293-2;Q15293	Reticulocalbin-1	RCN1	sp|Q15293-2|RCN1_HUMAN Isoform 2 of Reticulocalbin-1 OS=Homo sapiens OX=9606 GN=RCN1;sp|Q15293|RCN1_HUMAN Reticulocalbin-1 OS=Homo sapiens OX=9606 GN=RCN1 PE=1 SV=1	8057.4	2576.5	1	1	1	1	5393.1	5659.1	3868.3	3575.1	2924	4841.9	5097.1	5731.1	5055.2	5590.1	3934.9	2776.4	5714.8	4063.9	4456.8	3716.5	4708.7	4614.5	3751	2850	2019.6	1	3873	4115.9
Q15365;P57723-2;P57723	Poly(rC)-binding protein 1	PCBP1	sp|Q15365|PCBP1_HUMAN Poly(rC)-binding protein 1 OS=Homo sapiens OX=9606 GN=PCBP1 PE=1 SV=2	512040	537250	534220	455050	463670	445760	336440	335730	289070	300220	351240	341510	431920	439470	404920	444260	402710	403280	604230	504710	358390	362510	453850	464740	392990	393730	437610	426270	368710	357130
Q15366-3;Q15366-4;Q15366-6;Q15366-2;Q15366-5;Q15366;Q15366-7;Q15366-8;P57721-5;P57721-4;P57721;P57721-2;P57721-3	Poly(rC)-binding protein 2	PCBP2	sp|Q15366-3|PCBP2_HUMAN Isoform 3 of Poly(rC)-binding protein 2 OS=Homo sapiens OX=9606 GN=PCBP2;sp|Q15366-4|PCBP2_HUMAN Isoform 4 of Poly(rC)-binding protein 2 OS=Homo sapiens OX=9606 GN=PCBP2;sp|Q15366-6|PCBP2_HUMAN Isoform 6 of Poly(rC)-binding protein	199430	165990	128790	123630	129170	133840	108520	102600	79391	92829	113350	112510	142180	148350	120050	124280	112520	125250	162850	156320	118980	120090	154790	156780	138370	157740	124880	130910	126350	115490
Q15388	Mitochondrial import receptor subunit TOM20 homolog	TOMM20	sp|Q15388|TOM20_HUMAN Mitochondrial import receptor subunit TOM20 homolog OS=Homo sapiens OX=9606 GN=TOMM20 PE=1 SV=1	14463	11114	1	1	1	7960.8	7250.9	8215.4	7483.7	6871.1	7357.9	6272.6	6273.4	6568.2	4820.4	7112.5	6568.8	6014.4	11848	9712.6	7209.8	6809.3	6751.3	6724.1	1	8182.5	7876.4	9091.2	6142.9	6246.4
Q15393;Q15393-3;Q15393-2	Splicing factor 3B subunit 3	SF3B3	sp|Q15393|SF3B3_HUMAN Splicing factor 3B subunit 3 OS=Homo sapiens OX=9606 GN=SF3B3 PE=1 SV=4;sp|Q15393-3|SF3B3_HUMAN Isoform 3 of Splicing factor 3B subunit 3 OS=Homo sapiens OX=9606 GN=SF3B3	21613	20094	13187	16226	14126	14208	5377.7	5012.8	6842.5	4675.5	10596	9829.1	9058	10782	11120	13558	7827.6	11693	14804	14551	18105	17015	13262	12281	14087	13329	11729	9338.7	15158	15911
Q15417-3;Q15417;Q15417-2	Calponin-3	CNN3	sp|Q15417-3|CNN3_HUMAN Isoform 3 of Calponin-3 OS=Homo sapiens OX=9606 GN=CNN3;sp|Q15417|CNN3_HUMAN Calponin-3 OS=Homo sapiens OX=9606 GN=CNN3 PE=1 SV=1;sp|Q15417-2|CNN3_HUMAN Isoform 2 of Calponin-3 OS=Homo sapiens OX=9606 GN=CNN3	11966	13106	4431.5	6027.4	4467.2	7140.6	5751.6	3720.5	4342.9	3682.9	5135.8	6308.7	6927.9	6587.8	3758.9	7091.3	5010.2	4018.8	6643.7	4575.1	5248.3	6400	7513.4	6821.8	5048.3	4839.3	4455.7	4717.6	4603.7	5374.2
Q15424-2;Q15424;Q15424-4;Q15424-3	Scaffold attachment factor B1	SAFB	sp|Q15424-2|SAFB1_HUMAN Isoform 2 of Scaffold attachment factor B1 OS=Homo sapiens OX=9606 GN=SAFB;sp|Q15424|SAFB1_HUMAN Scaffold attachment factor B1 OS=Homo sapiens OX=9606 GN=SAFB PE=1 SV=4;sp|Q15424-4|SAFB1_HUMAN Isoform 4 of Scaffold attachment factor	1	1	1	1	1	1	1	1	1	1	1	1	1	1	1	1	1	1	1	1	5524.3	6973	1	1	1	1	1	1	1	1587.1
Q15427	Splicing factor 3B subunit 4	SF3B4	sp|Q15427|SF3B4_HUMAN Splicing factor 3B subunit 4 OS=Homo sapiens OX=9606 GN=SF3B4 PE=1 SV=1	9015.4	10888	8990.6	10952	13738	16624	5280.6	5996	1	1	4662.3	5411.7	5923.8	6535.7	8303.5	1	4610.9	2958.9	11487	7333.5	8247.8	8711.8	5914.4	6634.9	1	5343.2	5173.9	4335.9	10417	9403.6
Q15459;Q15459-2	Splicing factor 3A subunit 1	SF3A1	sp|Q15459|SF3A1_HUMAN Splicing factor 3A subunit 1 OS=Homo sapiens OX=9606 GN=SF3A1 PE=1 SV=1;sp|Q15459-2|SF3A1_HUMAN Isoform 2 of Splicing factor 3A subunit 1 OS=Homo sapiens OX=9606 GN=SF3A1	1207.7	2578.9	1	4191.4	1	1	1	1155.4	1	1	1	1	3257.4	1837.4	2932.2	2821.1	1616.3	1	1	4798.4	6715.1	6520.6	2747.4	2859.3	3348.8	3395.4	1	1	3028.8	4171.8
Q15645	Pachytene checkpoint protein 2 homolog	TRIP13	sp|Q15645|PCH2_HUMAN Pachytene checkpoint protein 2 homolog OS=Homo sapiens OX=9606 GN=TRIP13 PE=1 SV=2	1	1	1	1	1	1	1	1	2656.2	2159.5	1	1	1502	1621.9	1945.7	1018.4	1	4113.3	1	1353.1	1478.7	2019.7	1045.5	1306	1	939.43	1	1	1	1
Q15695	U2 small nuclear ribonucleoprotein auxiliary factor 35 kDa subunit-related protein 1	ZRSR1	sp|Q15695|U2AFL_HUMAN Putative U2 small nuclear ribonucleoprotein auxiliary factor 35 kDa subunit-related protein 1 OS=Homo sapiens OX=9606 GN=ZRSR2P1 PE=5 SV=2	1	1	1	1	1	1	13599	13226	20403	20473	12153	12994	7381.1	9442.8	6776.7	4692.2	6742.8	8014.5	1	3865.7	3455.8	3013.9	2727.7	2451.9	1	1	1	1	1	1
Q15717;Q15717-2	ELAV-like protein 1	ELAVL1	sp|Q15717|ELAV1_HUMAN ELAV-like protein 1 OS=Homo sapiens OX=9606 GN=ELAVL1 PE=1 SV=2;sp|Q15717-2|ELAV1_HUMAN Isoform 2 of ELAV-like protein 1 OS=Homo sapiens OX=9606 GN=ELAVL1	1	1	1	1	1	1	1	1	1	1	1	1	1660.3	2081	1560	2659.6	1	1409.3	1	1	10374	9938.1	1	1	1330.1	1	2472.6	3248.9	2402.6	2636.8
Q15773	Myeloid leukemia factor 2	MLF2	sp|Q15773|MLF2_HUMAN Myeloid leukemia factor 2 OS=Homo sapiens OX=9606 GN=MLF2 PE=1 SV=1	1	1	1	1	1	1	1	1	1663	1234.3	1	1620.1	1	1	1286.6	1	1	1	1	1	1598.6	1479.2	1	1	1	1	1	1	1	1
Q15843	NEDD8	NEDD8	sp|Q15843|NEDD8_HUMAN NEDD8 OS=Homo sapiens OX=9606 GN=NEDD8 PE=1 SV=1	3561.6	4758.8	1	1	1	1	1	1	1760.7	1059.9	3440.6	1	2737	1919.6	1	1	1	1	1	1	1	1	1482.8	1595.1	2498.9	4617.3	1	1	1	1
Q16222-2;Q16222-3;Q16222	UDP-N-acetylhexosamine pyrophosphorylase;UDP-N-acetylgalactosamine pyrophosphorylase;UDP-N-acetylglucosamine pyrophosphorylase	UAP1	sp|Q16222-2|UAP1_HUMAN Isoform AGX1 of UDP-N-acetylhexosamine pyrophosphorylase OS=Homo sapiens OX=9606 GN=UAP1;sp|Q16222-3|UAP1_HUMAN Isoform 3 of UDP-N-acetylhexosamine pyrophosphorylase OS=Homo sapiens OX=9606 GN=UAP1;sp|Q16222|UAP1_HUMAN UDP-N-acetylhe	1	1	1	48666	1	1	1	32710	1	1	40189	1	43605	1	1	1	1	1	1	1	1	1	48017	47370	55914	1	1	50194	1	1
Q16527	Cysteine and glycine-rich protein 2	CSRP2	sp|Q16527|CSRP2_HUMAN Cysteine and glycine-rich protein 2 OS=Homo sapiens OX=9606 GN=CSRP2 PE=1 SV=3	5008.1	1	4377.4	5285	1	6426.3	4010.2	3504.5	3004.5	1	3623.4	3915.8	4197.2	5033.2	4181.1	5565.4	1	1	5262.4	3870.8	3075.4	4093.7	4701.4	4061.8	3592.4	4113.1	1	1	2761.7	4297.7
Q16543	Hsp90 co-chaperone Cdc37;Hsp90 co-chaperone Cdc37, N-terminally processed	CDC37	sp|Q16543|CDC37_HUMAN Hsp90 co-chaperone Cdc37 OS=Homo sapiens OX=9606 GN=CDC37 PE=1 SV=1	6993.2	5039.5	1	2850	1	1	1	3372	4455.7	2283.5	7290.5	2516.4	7095.3	6533.2	5191.2	4194.6	1976.4	1	18315	17452	12552	14087	14670	16969	5154.7	5022.3	3676.9	3939.8	7072.7	5969.4
Q16629-3;Q16629-2;Q16629-4;Q16629	Serine/arginine-rich splicing factor 7	SRSF7	sp|Q16629-3|SRSF7_HUMAN Isoform 3 of Serine/arginine-rich splicing factor 7 OS=Homo sapiens OX=9606 GN=SRSF7;sp|Q16629-2|SRSF7_HUMAN Isoform 2 of Serine/arginine-rich splicing factor 7 OS=Homo sapiens OX=9606 GN=SRSF7;sp|Q16629-4|SRSF7_HUMAN Isoform 4 of S	6648.8	1	1	5150.6	1	9042	14525	11900	6467.5	3357.7	5091.9	7694.5	10264	12996	18581	19858	16326	19161	16969	14261	49336	49917	11814	8935.8	20561	21549	17983	18174	34281	35079
Q16630-3;Q16630;Q16630-2	Cleavage and polyadenylation specificity factor subunit 6	CPSF6	sp|Q16630-3|CPSF6_HUMAN Isoform 3 of Cleavage and polyadenylation specificity factor subunit 6 OS=Homo sapiens OX=9606 GN=CPSF6;sp|Q16630|CPSF6_HUMAN Cleavage and polyadenylation specificity factor subunit 6 OS=Homo sapiens OX=9606 GN=CPSF6 PE=1 SV=2;sp|Q1	187720	179670	236940	252300	301400	296890	184730	189590	121030	126270	123240	128950	150830	152180	200810	205970	176740	162210	253220	238100	154560	163450	152100	155820	157720	149880	244110	247360	199550	178730
Q16637-3;Q16637;Q16637-4;Q16637-2	Survival motor neuron protein	SMN1	sp|Q16637-3|SMN_HUMAN Isoform SMN-delta7 of Survival motor neuron protein OS=Homo sapiens OX=9606 GN=SMN1;sp|Q16637|SMN_HUMAN Survival motor neuron protein OS=Homo sapiens OX=9606 GN=SMN1 PE=1 SV=1;sp|Q16637-4|SMN_HUMAN Isoform SMN-delta57 of Survival moto	1	1	1	1	1	1	65284	71060	84618	89809	70016	65222	49511	55808	47994	51860	36244	44278	14165	11513	8598.5	9939.9	5952.8	9736.4	8067.8	5613.8	23438	14977	12866	11561
Q16769;Q16769-2	Glutaminyl-peptide cyclotransferase	QPCT	sp|Q16769|QPCT_HUMAN Glutaminyl-peptide cyclotransferase OS=Homo sapiens OX=9606 GN=QPCT PE=1 SV=1;sp|Q16769-2|QPCT_HUMAN Isoform 2 of Glutaminyl-peptide cyclotransferase OS=Homo sapiens OX=9606 GN=QPCT	33798	37138	19984	11689	23888	25063	14614	17607	24405	22547	30730	27427	28410	31133	24625	29792	34051	40920	30893	31653	33823	30419	43865	42537	45716	52033	51750	50022	52837	54755
Q16778;P33778;P23527;P06899;Q8N257;Q6DRA6;Q6DN03	Histone H2B type 2-E;Histone H2B type 1-B;Histone H2B type 1-O;Histone H2B type 1-J;Histone H2B type 3-B	HIST2H2BE;HIST1H2BB;HIST1H2BO;HIST1H2BJ;HIST3H2BB	sp|Q16778|H2B2E_HUMAN Histone H2B type 2-E OS=Homo sapiens OX=9606 GN=H2BC21 PE=1 SV=3;sp|P33778|H2B1B_HUMAN Histone H2B type 1-B OS=Homo sapiens OX=9606 GN=H2BC3 PE=1 SV=2;sp|P23527|H2B1O_HUMAN Histone H2B type 1-O OS=Homo sapiens OX=9606 GN=H2BC17 PE=1 S	89908	71762	194090	188830	383700	335580	459600	482190	194380	206660	301870	305700	275510	269610	591960	688710	719200	715180	390420	323090	1815900	1674900	382680	314450	787070	795230	369520	348300	1298700	1271700
Q16864;Q16864-2	V-type proton ATPase subunit F	ATP6V1F	sp|Q16864|VATF_HUMAN V-type proton ATPase subunit F OS=Homo sapiens OX=9606 GN=ATP6V1F PE=1 SV=2;sp|Q16864-2|VATF_HUMAN Isoform 2 of V-type proton ATPase subunit F OS=Homo sapiens OX=9606 GN=ATP6V1F	1	1	1	1	1	1	6584.7	6066.6	6255.5	4907.4	8948.2	7852.6	6450.2	4462.6	1	1	1	1	1	1	1	1	1	1	1	1	1	1	1	1
Q16891-3;Q16891-2;Q16891-4;Q16891	MICOS complex subunit MIC60	IMMT	sp|Q16891-3|MIC60_HUMAN Isoform 3 of MICOS complex subunit MIC60 OS=Homo sapiens OX=9606 GN=IMMT;sp|Q16891-2|MIC60_HUMAN Isoform 2 of MICOS complex subunit MIC60 OS=Homo sapiens OX=9606 GN=IMMT;sp|Q16891-4|MIC60_HUMAN Isoform 4 of MICOS complex subunit MIC	1	1	1	1	1	1	12931	14452	14865	14716	11007	13791	10536	11629	9783.1	9882.8	10948	7641.7	5968.6	8328	7778	8664.9	5831.4	6544	7184.5	6985.7	5454	8940.2	8250.4	8171.1
Q1ED39	Lysine-rich nucleolar protein 1	KNOP1	sp|Q1ED39|KNOP1_HUMAN Lysine-rich nucleolar protein 1 OS=Homo sapiens OX=9606 GN=KNOP1 PE=1 SV=1	1	1	1	1	1	1	1	1	1	1	1	1	1854.4	1	3791.5	3974	1	1	1	4045.4	2935.6	3498.2	1	1	1	1	2893.5	1	1	3075.5
Q2TBE0;Q2TBE0-2;Q2TBE0-3	CWF19-like protein 2	CWF19L2	sp|Q2TBE0|C19L2_HUMAN CWF19-like protein 2 OS=Homo sapiens OX=9606 GN=CWF19L2 PE=1 SV=4;sp|Q2TBE0-2|C19L2_HUMAN Isoform 2 of CWF19-like protein 2 OS=Homo sapiens OX=9606 GN=CWF19L2;sp|Q2TBE0-3|C19L2_HUMAN Isoform 3 of CWF19-like protein 2 OS=Homo sapiens O	223850	210180	273130	284660	272370	270690	212440	219100	165960	168690	177370	182050	204920	203320	247110	238260	205340	209700	239520	262680	196810	201540	195270	195640	185030	184160	265650	278050	238370	236840
Q3B726	DNA-directed RNA polymerase I subunit RPA43	TWISTNB	sp|Q3B726|RPA43_HUMAN DNA-directed RNA polymerase I subunit RPA43 OS=Homo sapiens OX=9606 GN=POLR1F PE=1 SV=1	160200	144140	153240	159290	162130	153670	137640	143750	114720	106140	85535	84483	110660	117520	144720	151600	149650	150400	212280	206980	143190	140270	150150	149650	167900	167040	213270	227770	156170	156620
Q3MHD2;Q3MHD2-2	Protein LSM12 homolog	LSM12	sp|Q3MHD2|LSM12_HUMAN Protein LSM12 homolog OS=Homo sapiens OX=9606 GN=LSM12 PE=1 SV=2;sp|Q3MHD2-2|LSM12_HUMAN Isoform 2 of Protein LSM12 homolog OS=Homo sapiens OX=9606 GN=LSM12	3442.4	1	1	3783.3	1	1	1	1	4172.7	4481.4	4330.4	5550.2	5096.2	6207.3	5844.4	4600.1	4161.2	4038.1	4118.1	3505.4	4253.3	4651.2	4680.7	5637.4	4571.3	5757.5	3585.5	1	4031	3721.6
Q3YEC7;Q3YEC7-2;Q3YEC7-4;Q3YEC7-5;Q3YEC7-6;Q3YEC7-3	Rab-like protein 6	RABL6	sp|Q3YEC7|RABL6_HUMAN Rab-like protein 6 OS=Homo sapiens OX=9606 GN=RABL6 PE=1 SV=2;sp|Q3YEC7-2|RABL6_HUMAN Isoform 2 of Rab-like protein 6 OS=Homo sapiens OX=9606 GN=RABL6	15466	13250	19278	25938	20816	29184	18184	21720	16012	14023	14646	14138	11741	15395	23363	30989	11289	10149	32765	31822	21605	20496	15106	16689	16456	17299	26934	30024	20188	20905
Q3ZCM7;A6NNZ2	Tubulin beta-8 chain;Tubulin beta-8 chain-like protein LOC260334	TUBB8	sp|Q3ZCM7|TBB8_HUMAN Tubulin beta-8 chain OS=Homo sapiens OX=9606 GN=TUBB8 PE=1 SV=2;sp|A6NNZ2|TBB8B_HUMAN Tubulin beta 8B OS=Homo sapiens OX=9606 GN=TUBB8B PE=1 SV=1	21361	15429	1	1	1	1	26554	24080	21821	21243	11075	10477	19994	13179	26968	7838.4	18960	11957	17656	13031	11927	14195	35865	37490	27637	26833	14373	7147.3	1	7079.6
Q3ZCQ8-3;Q3ZCQ8;Q3ZCQ8-2	Mitochondrial import inner membrane translocase subunit TIM50	TIMM50	sp|Q3ZCQ8-3|TIM50_HUMAN Isoform 3 of Mitochondrial import inner membrane translocase subunit TIM50 OS=Homo sapiens OX=9606 GN=TIMM50;sp|Q3ZCQ8|TIM50_HUMAN Mitochondrial import inner membrane translocase subunit TIM50 OS=Homo sapiens OX=9606 GN=TIMM50 PE=1	1446.4	1819.9	1	1	1	1	10705	7429.6	12118	10952	10728	9890.6	10287	11186	10465	9053.1	12328	7839.3	12126	11338	11401	11051	11689	10659	5090.4	5804.1	4358.7	5246.7	6230.7	6183.2
Q4KMP7;Q4KMP7-2	TBC1 domain family member 10B	TBC1D10B	sp|Q4KMP7|TB10B_HUMAN TBC1 domain family member 10B OS=Homo sapiens OX=9606 GN=TBC1D10B PE=1 SV=3;sp|Q4KMP7-2|TB10B_HUMAN Isoform 2 of TBC1 domain family member 10B OS=Homo sapiens OX=9606 GN=TBC1D10B	4782.9	2564	1	1	1	1	1	3267.9	1	1	644.02	1	1548.3	1611.5	3437.7	1	2528	4107.8	1	3782.8	2796.4	1	2867.1	3772.4	1	1	1	1	2512.1	1
Q4VCS5-2;Q4VCS5	Angiomotin	AMOT	sp|Q4VCS5-2|AMOT_HUMAN Isoform 2 of Angiomotin OS=Homo sapiens OX=9606 GN=AMOT;sp|Q4VCS5|AMOT_HUMAN Angiomotin OS=Homo sapiens OX=9606 GN=AMOT PE=1 SV=1	1	1	1	1	1	1	1	1	1	1	1	1	1	1	1	1	1	1	1	1	3612.3	2510.8	1	1	1	1	1	1	1	1
Q53GQ0	Very-long-chain 3-oxoacyl-CoA reductase	HSD17B12	sp|Q53GQ0|DHB12_HUMAN Very-long-chain 3-oxoacyl-CoA reductase OS=Homo sapiens OX=9606 GN=HSD17B12 PE=1 SV=2	5538	1	1	1	1	1	7151.9	4856.7	10358	9811.8	7805.8	6742.1	5518.8	6185.6	7462	7874.3	6918.9	5158.8	1	7592.7	8524.4	7740.1	7370.5	3741.5	3995.9	3575.9	1	1	2206.5	1
Q53GS9-2;Q53GS9;Q53GS9-3	U4/U6.U5 tri-snRNP-associated protein 2	USP39	sp|Q53GS9-2|SNUT2_HUMAN Isoform 2 of U4/U6.U5 tri-snRNP-associated protein 2 OS=Homo sapiens OX=9606 GN=USP39;sp|Q53GS9|SNUT2_HUMAN U4/U6.U5 tri-snRNP-associated protein 2 OS=Homo sapiens OX=9606 GN=USP39 PE=1 SV=2;sp|Q53GS9-3|SNUT2_HUMAN Isoform 3 of U4/U	5510	5464.8	1	3950	5049.8	2950	1	1	1	1	1	1423.7	1	1	3117	1074	1	1	2533.5	1	4899.6	5694.5	1	1	2276.5	1	1	1	1	3459.7
Q53H12	Acylglycerol kinase, mitochondrial	AGK	sp|Q53H12|AGK_HUMAN Acylglycerol kinase, mitochondrial OS=Homo sapiens OX=9606 GN=AGK PE=1 SV=2	23147	21635	1	4990.2	17848	18021	56913	47872	80280	80488	69141	73085	59423	62857	51755	45283	52552	61577	64763	62897	54741	55901	32978	41317	42363	33557	54261	54267	41907	45245
Q56A73	Spindlin-4	SPIN4	sp|Q56A73|SPIN4_HUMAN Spindlin-4 OS=Homo sapiens OX=9606 GN=SPIN4 PE=1 SV=1	2400.7	2926.4	1	1320	1	1	2504.9	3322.2	2147.6	1	1	1493.4	1	4995.7	3849.3	1203.5	3238.1	2956.2	1	2973.2	3872.2	3434.1	2846.2	3447.1	4990.1	1	6305.3	5191.5	11434	8703.2
Q58FF8	Putative heat shock protein HSP 90-beta 2	HSP90AB2P	sp|Q58FF8|H90B2_HUMAN Putative heat shock protein HSP 90-beta 2 OS=Homo sapiens OX=9606 GN=HSP90AB2P PE=1 SV=2	21117	13430	1	1	1	1	8814.4	10311	1	17601	22720	18345	1	1	1	766.87	7144.4	13890	1	10442	20387	12244	23760	13420	21805	1	6888.6	1907.1	6103.8	6474.1
Q5BKY9;Q5BKY9-2;Q8N9E0	Protein FAM133B;Protein FAM133A	FAM133B;FAM133A	sp|Q5BKY9|F133B_HUMAN Protein FAM133B OS=Homo sapiens OX=9606 GN=FAM133B PE=1 SV=1;sp|Q5BKY9-2|F133B_HUMAN Isoform 2 of Protein FAM133B OS=Homo sapiens OX=9606 GN=FAM133B;sp|Q8N9E0|F133A_HUMAN Protein FAM133A OS=Homo sapiens OX=9606 GN=FAM133A PE=1 SV=1	422110	400200	544710	590850	574640	630290	395830	410140	342060	320580	305640	353980	350910	352750	475560	607500	531850	458110	546960	377940	349040	363360	399010	404960	355910	352700	583560	577430	544120	501570
Q5BKZ1-3;Q5BKZ1	DBIRD complex subunit ZNF326	ZNF326	sp|Q5BKZ1-3|ZN326_HUMAN Isoform 3 of DBIRD complex subunit ZNF326 OS=Homo sapiens OX=9606 GN=ZNF326;sp|Q5BKZ1|ZN326_HUMAN DBIRD complex subunit ZNF326 OS=Homo sapiens OX=9606 GN=ZNF326 PE=1 SV=2	1	1	1	1	1	1	1	1	1	1	1	1	1	1	1	1	1	1	1	1	9532.1	10043	1	1	1	1	1	1	1	3520.9
Q5JTH9-2;Q5JTH9-3;Q5JTH9	RRP12-like protein	RRP12	sp|Q5JTH9-2|RRP12_HUMAN Isoform 2 of RRP12-like protein OS=Homo sapiens OX=9606 GN=RRP12;sp|Q5JTH9-3|RRP12_HUMAN Isoform 3 of RRP12-like protein OS=Homo sapiens OX=9606 GN=RRP12;sp|Q5JTH9|RRP12_HUMAN RRP12-like protein OS=Homo sapiens OX=9606 GN=RRP12 PE=1	1	1	1	1	1	1	1	1	1	1	1	1	1	1	1	1	1	1	1	1	1	1	1	1	1	1	1	1	1	1
Q5SRE5;Q5SRE5-2	Nucleoporin NUP188 homolog	NUP188	sp|Q5SRE5|NU188_HUMAN Nucleoporin NUP188 homolog OS=Homo sapiens OX=9606 GN=NUP188 PE=1 SV=1;sp|Q5SRE5-2|NU188_HUMAN Isoform 2 of Nucleoporin NUP188 homolog OS=Homo sapiens OX=9606 GN=NUP188	1	1	1	1	1	1	34140	37881	83606	79102	46608	42432	26944	28623	13720	11603	16539	16414	1522.4	1321.2	1451.2	1448.1	1	800.1	810.62	931.61	1434	1201.9	1	279.65
Q5SSJ5-5;Q5SSJ5	Heterochromatin protein 1-binding protein 3	HP1BP3	sp|Q5SSJ5-5|HP1B3_HUMAN Isoform 4 of Heterochromatin protein 1-binding protein 3 OS=Homo sapiens OX=9606 GN=HP1BP3;sp|Q5SSJ5|HP1B3_HUMAN Heterochromatin protein 1-binding protein 3 OS=Homo sapiens OX=9606 GN=HP1BP3 PE=1 SV=1	1	1	1	1	1	1	1	1	1	1	1	1	1	1	1	1	1	1	1	1	1213.3	1277.4	1	1	1	1	1	1	1	1
Q5SWX8;Q5SWX8-3;Q5SWX8-4;Q5SWX8-2	Protein odr-4 homolog	ODR4	sp|Q5SWX8|ODR4_HUMAN Protein odr-4 homolog OS=Homo sapiens OX=9606 GN=ODR4 PE=1 SV=1;sp|Q5SWX8-3|ODR4_HUMAN Isoform 3 of Protein odr-4 homolog OS=Homo sapiens OX=9606 GN=ODR4;sp|Q5SWX8-4|ODR4_HUMAN Isoform 4 of Protein odr-4 homolog OS=Homo sapiens OX=9606	1473.1	3452.7	1	1	1	1	21989	21968	21063	19969	18788	17231	18739	18506	21121	18642	18021	20780	16463	18269	14857	15587	17056	16319	13852	14656	19527	19675	17190	17921
Q5T280	Putative methyltransferase C9orf114	C9orf114	sp|Q5T280|CI114_HUMAN Putative methyltransferase C9orf114 OS=Homo sapiens OX=9606 GN=SPOUT1 PE=1 SV=3	1	1129.4	1	1	1	1	1	1	1	1	1	1	1	1	2625	1	1	1	1	1	1	1570	1	1	1	1	1	1	1	1
Q5T3I0-3;Q5T3I0;Q5T3I0-2	G patch domain-containing protein 4	GPATCH4	sp|Q5T3I0-3|GPTC4_HUMAN Isoform 3 of G patch domain-containing protein 4 OS=Homo sapiens OX=9606 GN=GPATCH4;sp|Q5T3I0|GPTC4_HUMAN G patch domain-containing protein 4 OS=Homo sapiens OX=9606 GN=GPATCH4 PE=1 SV=2	29476	32178	41051	44799	38605	41531	32777	29523	20919	19548	22138	19853	20456	19574	32219	34234	25863	21223	39744	35551	25773	27713	22802	22667	21552	22367	31487	32121	25932	25908
Q5T440	Putative transferase CAF17, mitochondrial	IBA57	sp|Q5T440|CAF17_HUMAN Putative transferase CAF17, mitochondrial OS=Homo sapiens OX=9606 GN=IBA57 PE=1 SV=1	1	1227.6	1	1	1	1	1	1	1	1	1	1	1	1	1	1	1	1	1	1	1	770.99	1	1	1	1	1	1	1	1
Q5T447	E3 ubiquitin-protein ligase HECTD3	HECTD3	sp|Q5T447|HECD3_HUMAN E3 ubiquitin-protein ligase HECTD3 OS=Homo sapiens OX=9606 GN=HECTD3 PE=1 SV=1	1	1	1	1	1	1	1890.2	3378.7	13318	11414	7507.5	9960.9	1	2766	1	2040.5	1	2499.5	1	1	1	1	1	1	1	1	1	1	1	1
Q5T749	Keratinocyte proline-rich protein	KPRP	sp|Q5T749|KPRP_HUMAN Keratinocyte proline-rich protein OS=Homo sapiens OX=9606 GN=KPRP PE=1 SV=1	1	1	1	1	1	1	1	1	1	1	1	1	1	1	1	1	1	1	1	1	1	1	1	1	1	1	1	1	1	1
Q5T750	Skin-specific protein 32	XP32	sp|Q5T750|XP32_HUMAN Skin-specific protein 32 OS=Homo sapiens OX=9606 GN=XP32 PE=1 SV=1	1	1	1	1	10798	1	1	1	1	1	1	1	2582.3	2793.3	2485	2378.1	2094.1	1	1	1	1	1	1	1	1	1	1	1	1	1
Q5T9A4;Q5T9A4-3;Q5T9A4-2	ATPase family AAA domain-containing protein 3B	ATAD3B	sp|Q5T9A4|ATD3B_HUMAN ATPase family AAA domain-containing protein 3B OS=Homo sapiens OX=9606 GN=ATAD3B PE=1 SV=1;sp|Q5T9A4-3|ATD3B_HUMAN Isoform 3 of ATPase family AAA domain-containing protein 3B OS=Homo sapiens OX=9606 GN=ATAD3B	1	1	1	1	1	1	2413.3	1	1	1	1	1	3516.2	674.7	2566.6	3109.1	1	1	909.75	1	6301.2	6770.4	1	1	1	1	1	1	2662.8	1
Q5UIP0-2;Q5UIP0	Telomere-associated protein RIF1	RIF1	sp|Q5UIP0-2|RIF1_HUMAN Isoform 2 of Telomere-associated protein RIF1 OS=Homo sapiens OX=9606 GN=RIF1;sp|Q5UIP0|RIF1_HUMAN Telomere-associated protein RIF1 OS=Homo sapiens OX=9606 GN=RIF1 PE=1 SV=2	10625	10000	6244.1	10982	10471	12720	7912.1	7923.6	6713.7	5249.8	3569.6	3386.1	10624	10777	12619	16022	7415.4	9845.7	14101	12693	10646	11994	12620	11805	8732.4	9450.5	11237	10567	9753.2	11549
Q5VTL8;Q5VTL8-2	Pre-mRNA-splicing factor 38B	PRPF38B	sp|Q5VTL8|PR38B_HUMAN Pre-mRNA-splicing factor 38B OS=Homo sapiens OX=9606 GN=PRPF38B PE=1 SV=1;sp|Q5VTL8-2|PR38B_HUMAN Isoform 2 of Pre-mRNA-splicing factor 38B OS=Homo sapiens OX=9606 GN=PRPF38B	24057	16937	20426	23258	25691	19050	18587	20789	15948	14413	22009	22243	13179	12251	16414	13011	20895	24147	17427	21855	14660	16599	14864	13568	18914	17259	25610	24580	22302	22301
Q5W0B1	RING finger protein 219	RNF219	sp|Q5W0B1|OBI1_HUMAN ORC ubiquitin ligase 1 OS=Homo sapiens OX=9606 GN=OBI1 PE=1 SV=1	42235	43838	44912	52475	46723	52739	7776.5	9248.6	5487.5	5766.8	10073	9697.3	12952	13398	17091	20438	12015	12888	30232	29388	31319	29754	25965	27766	22114	21141	24537	25408	38385	36715
Q66K79-3;Q66K79-2;Q66K79	Carboxypeptidase Z	CPZ	sp|Q66K79-3|CBPZ_HUMAN Isoform 3 of Carboxypeptidase Z OS=Homo sapiens OX=9606 GN=CPZ;sp|Q66K79-2|CBPZ_HUMAN Isoform 2 of Carboxypeptidase Z OS=Homo sapiens OX=9606 GN=CPZ;sp|Q66K79|CBPZ_HUMAN Carboxypeptidase Z OS=Homo sapiens OX=9606 GN=CPZ PE=1 SV=2	1	1	1	1	1	1	56817	39722	220020	492600	155740	1	108660	115690	51640	1	59806	87481	1	1	1	1	1	1	1	1	1	1	1	1
Q66PJ3-4	ADP-ribosylation factor-like protein 6-interacting protein 4	ARL6IP4	sp|Q66PJ3-4|AR6P4_HUMAN Isoform 4 of ADP-ribosylation factor-like protein 6-interacting protein 4 OS=Homo sapiens OX=9606 GN=ARL6IP4	38500	25539	11154	1	14157	21214	11065	2247	1	6031.3	1	1	5128.7	4573.7	1	7001	6051.7	4309.4	40324	19953	21392	20919	23625	25803	41142	39731	31533	30921	23902	27194
Q66PJ3-7;Q66PJ3-3;Q66PJ3-2;Q66PJ3;Q66PJ3-5	ADP-ribosylation factor-like protein 6-interacting protein 4	ARL6IP4	sp|Q66PJ3-7|AR6P4_HUMAN Isoform 7 of ADP-ribosylation factor-like protein 6-interacting protein 4 OS=Homo sapiens OX=9606 GN=ARL6IP4;sp|Q66PJ3-3|AR6P4_HUMAN Isoform 3 of ADP-ribosylation factor-like protein 6-interacting protein 4 OS=Homo sapiens OX=9606 G	1220800	1133100	1517200	1552100	1589600	1559100	1229800	1246400	774540	787620	843440	903240	922310	910580	1238900	1162200	1169400	1170400	1418000	1414400	1095300	1128600	1126400	1108400	917850	876810	1457500	1516900	1447800	1410200
Q6IAA8	Ragulator complex protein LAMTOR1	LAMTOR1	sp|Q6IAA8|LTOR1_HUMAN Ragulator complex protein LAMTOR1 OS=Homo sapiens OX=9606 GN=LAMTOR1 PE=1 SV=2	1	480.11	1	1	1	1	69054	61079	69226	66926	90836	88960	65114	64156	43943	48776	51130	63951	23848	18365	12641	12840	16599	16929	29380	26612	34194	32967	23652	25551
Q6IEG0	U11/U12 small nuclear ribonucleoprotein 48 kDa protein	SNRNP48	sp|Q6IEG0|SNR48_HUMAN U11/U12 small nuclear ribonucleoprotein 48 kDa protein OS=Homo sapiens OX=9606 GN=SNRNP48 PE=1 SV=2	1	1	1	1	1	1	1	1	1	1	1	1	1196.7	1423.9	3878.3	2742.5	1	1	1133.5	2852.1	2818.7	2162.8	1412.4	1	1707.7	1	1	1	1	2528.1
Q6N021;Q6N021-2;Q6N021-3	Methylcytosine dioxygenase TET2	TET2	sp|Q6N021|TET2_HUMAN Methylcytosine dioxygenase TET2 OS=Homo sapiens OX=9606 GN=TET2 PE=1 SV=3	19971	18289	12784	18391	11494	13421	808.05	1	1	1	1	2591.2	3199.7	3485.1	5968	3122.6	1961.1	2569.9	4218.6	8175.2	7715.9	7366.4	8616.1	8123.1	4123.9	3874	4035.1	4204.7	4298.6	7763.8
Q6NSJ2;Q6NSJ2-2	Pleckstrin homology-like domain family B member 3	PHLDB3	sp|Q6NSJ2|PHLB3_HUMAN Pleckstrin homology-like domain family B member 3 OS=Homo sapiens OX=9606 GN=PHLDB3 PE=1 SV=3;sp|Q6NSJ2-2|PHLB3_HUMAN Isoform 2 of Pleckstrin homology-like domain family B member 3 OS=Homo sapiens OX=9606 GN=PHLDB3	1	1	1	1	1	1	24415	19354	34360	24066	9345.5	7498.7	14633	17447	7277.5	4800.9	4277.6	1580.2	383.16	1276	252.01	1074.7	1	1212.3	1	1	1	1	1	1
Q6P1M0-2;Q6P1M0	Long-chain fatty acid transport protein 4	SLC27A4	sp|Q6P1M0-2|S27A4_HUMAN Isoform 2 of Long-chain fatty acid transport protein 4 OS=Homo sapiens OX=9606 GN=SLC27A4;sp|Q6P1M0|S27A4_HUMAN Long-chain fatty acid transport protein 4 OS=Homo sapiens OX=9606 GN=SLC27A4 PE=1 SV=1	1	1	1	1	1	1	1	1	9212.1	4969	5848.9	3362.4	1	2662.8	4083.9	1	1	1	1	1	1	3944.1	1	1	1	1	1	1	1	1
Q6P1X5	Transcription initiation factor TFIID subunit 2	TAF2	sp|Q6P1X5|TAF2_HUMAN Transcription initiation factor TFIID subunit 2 OS=Homo sapiens OX=9606 GN=TAF2 PE=1 SV=3	217950	201650	172150	184710	153640	152770	128440	129570	171680	163740	169920	169720	180030	180900	160590	156490	161280	172730	168830	184880	156100	157070	185950	186440	210040	210260	208770	213160	161520	160910
Q6P2Q9	Pre-mRNA-processing-splicing factor 8	PRPF8	sp|Q6P2Q9|PRP8_HUMAN Pre-mRNA-processing-splicing factor 8 OS=Homo sapiens OX=9606 GN=PRPF8 PE=1 SV=2	8236.7	4275.1	5154.3	1	6152.7	8050.6	6133.4	1	5927.2	1	7129.6	7650.3	4310.3	4866.1	11570	18496	6056.7	5691.8	14689	10394	22404	21639	9135.2	4842	8085.1	8299.1	9112.8	10987	11539	13803
Q6P3X3	Tetratricopeptide repeat protein 27	TTC27	sp|Q6P3X3|TTC27_HUMAN Tetratricopeptide repeat protein 27 OS=Homo sapiens OX=9606 GN=TTC27 PE=1 SV=1	1	1	1	1	1	1	6031.1	6526.8	11666	8957.2	8323.4	8438.3	6465.7	8016.7	8679.6	6768.5	1	1	3235.7	3872.2	3178.3	2882.3	1	1	1	1	1	1	1	1
Q6P4A7-2;Q6P4A7	Sideroflexin-4	SFXN4	sp|Q6P4A7-2|SFXN4_HUMAN Isoform 2 of Sideroflexin-4 OS=Homo sapiens OX=9606 GN=SFXN4;sp|Q6P4A7|SFXN4_HUMAN Sideroflexin-4 OS=Homo sapiens OX=9606 GN=SFXN4 PE=1 SV=1	1	1	1	1	1	1	4874.8	4510.4	4482.1	4070.7	2763.4	3875.2	1	4119.2	3747.2	3265.2	4077	1887	2716.9	1	1	2104.4	752.09	1731.6	1	1	1	1	1	1
Q6PCB5-2;Q6PCB5	Round spermatid basic protein 1-like protein	RSBN1L	sp|Q6PCB5-2|RSBNL_HUMAN Isoform 2 of Lysine-specific demethylase RSBN1L OS=Homo sapiens OX=9606 GN=RSBN1L;sp|Q6PCB5|RSBNL_HUMAN Lysine-specific demethylase RSBN1L OS=Homo sapiens OX=9606 GN=RSBN1L PE=1 SV=2	18432	9444.5	12526	17286	12013	12814	3603.2	7128.2	9611.7	8703.6	11094	10746	10599	11241	18922	23411	4035	11031	19554	20822	14590	16524	13771	15075	16431	14784	16721	20075	18074	15559
Q6PK04	Coiled-coil domain-containing protein 137	CCDC137	sp|Q6PK04|CC137_HUMAN Coiled-coil domain-containing protein 137 OS=Homo sapiens OX=9606 GN=CCDC137 PE=1 SV=1	5597.6	4563	1	5575.6	1	6649.5	5731.4	1	1	6152.5	1746.5	1	1	5800.1	9150	13970	3291	5528.7	12485	11833	12106	9720.4	1	5066.5	5484.5	6046.1	10779	10464	7494.2	5253.6
Q6Q0C0-2;Q6Q0C0	E3 ubiquitin-protein ligase TRAF7	TRAF7	sp|Q6Q0C0-2|TRAF7_HUMAN Isoform 2 of E3 ubiquitin-protein ligase TRAF7 OS=Homo sapiens OX=9606 GN=TRAF7;sp|Q6Q0C0|TRAF7_HUMAN E3 ubiquitin-protein ligase TRAF7 OS=Homo sapiens OX=9606 GN=TRAF7 PE=1 SV=1	1	1	1	1	1	1	1	1	2845.8	1	1	1	1	1	1	1	1	1	1	1	1	1	1	1	1	3821	4554.1	7120.5	3335.1	3936.2
Q6UB35;Q6UB35-2	Monofunctional C1-tetrahydrofolate synthase, mitochondrial	MTHFD1L	sp|Q6UB35|C1TM_HUMAN Monofunctional C1-tetrahydrofolate synthase, mitochondrial OS=Homo sapiens OX=9606 GN=MTHFD1L PE=1 SV=1	5285.4	5695.9	1	7028.5	1	1	1691.9	2994.9	2270.5	4073.4	4660.1	2911.4	3424.7	5531	4596.2	6521.5	1	4041.4	6232	5485.1	7791.8	5862.8	7572.4	6502.9	4725.5	5935.5	4413.9	3270.1	4522.7	4493.6
Q6UN15-3;Q6UN15-5;Q6UN15;Q6UN15-4	Pre-mRNA 3-end-processing factor FIP1	FIP1L1	sp|Q6UN15-3|FIP1_HUMAN Isoform 3 of Pre-mRNA 3-end-processing factor FIP1 OS=Homo sapiens OX=9606 GN=FIP1L1;sp|Q6UN15-5|FIP1_HUMAN Isoform 5 of Pre-mRNA 3-end-processing factor FIP1 OS=Homo sapiens OX=9606 GN=FIP1L1;sp|Q6UN15|FIP1_HUMAN Pre-mRNA 3-end-p	44074	41037	48959	54688	65415	68706	40976	42897	31649	30447	28088	28219	42798	43645	60409	68795	43215	41811	78316	69145	48451	47174	45597	43334	37821	36465	58827	62570	49010	47021
Q6UVY6-2;Q6UVY6	DBH-like monooxygenase protein 1	MOXD1	sp|Q6UVY6-2|MOXD1_HUMAN Isoform 2 of DBH-like monooxygenase protein 1 OS=Homo sapiens OX=9606 GN=MOXD1;sp|Q6UVY6|MOXD1_HUMAN DBH-like monooxygenase protein 1 OS=Homo sapiens OX=9606 GN=MOXD1 PE=1 SV=1	1	1	1	1	1	1	6636.1	8991	7660.1	6811.7	6175.1	6785.4	6687.4	7102.9	4621.1	1950.3	6711.4	7491.2	1	1	3156.9	3726	1557.8	2565.8	5002.6	4193.5	3087.8	3740.7	4820.7	4781.1
Q6UXN9	WD repeat-containing protein 82	WDR82	sp|Q6UXN9|WDR82_HUMAN WD repeat-containing protein 82 OS=Homo sapiens OX=9606 GN=WDR82 PE=1 SV=1	1686.8	1	1	3894.5	1	1	2568.1	3812	1	1	1	1	1	3498.1	9012.3	12736	1	3136.5	8659.6	11076	7262.5	6942.1	3202.2	4207.2	3517.2	1	6866.8	6630.2	4547.2	5278.2
Q6ZQX7-4;Q6ZQX7-2;Q6ZQX7-3;Q6ZQX7	Protein LIAT1	LIAT1	sp|Q6ZQX7-4|LIAT1_HUMAN Isoform 4 of Protein LIAT1 OS=Homo sapiens OX=9606 GN=LIAT1;sp|Q6ZQX7-2|LIAT1_HUMAN Isoform 2 of Protein LIAT1 OS=Homo sapiens OX=9606 GN=LIAT1;sp|Q6ZQX7-3|LIAT1_HUMAN Isoform 3 of Protein LIAT1 OS=Homo sapiens OX=9606 GN=LIAT1;sp|Q	1	408.31	1	1	1	1	2048.7	1	1	1	1	1	2249.3	2224.1	7038.3	8264.8	1582.9	1	1	3921.7	3472.2	5954.3	2054	1	1991.1	1	4242.6	4095.1	2994.3	4074.1
Q6ZUT1-2;Q6ZUT1;Q6ZUT1-3	Uncharacterized protein C11orf57	C11orf57	sp|Q6ZUT1-2|NKAP1_HUMAN Isoform 2 of Uncharacterized protein NKAPD1 OS=Homo sapiens OX=9606 GN=NKAPD1;sp|Q6ZUT1|NKAP1_HUMAN Uncharacterized protein NKAPD1 OS=Homo sapiens OX=9606 GN=NKAPD1 PE=1 SV=2;sp|Q6ZUT1-3|NKAP1_HUMAN Isoform 3 of Uncharacterized prot	50478	55676	76987	73734	74736	84218	74076	71917	53366	53841	58762	55917	57357	55989	76946	94234	60302	65431	97891	78584	55230	60888	56183	57498	56514	50263	81106	86750	68314	75747
Q6ZUT9;Q6ZUT9-2	DENN domain-containing protein 5B	DENND5B	sp|Q6ZUT9|DEN5B_HUMAN DENN domain-containing protein 5B OS=Homo sapiens OX=9606 GN=DENND5B PE=1 SV=2;sp|Q6ZUT9-2|DEN5B_HUMAN Isoform 2 of DENN domain-containing protein 5B OS=Homo sapiens OX=9606 GN=DENND5B	206030	393890	106980	184880	70442	43414	160660	176450	348660	266040	411860	316470	332140	342720	305520	181090	233290	313080	92943	255010	258440	249490	320180	255800	233870	240800	376660	381950	225510	257900
Q70Z53-2;Q70Z53-4;Q70Z53-5;Q70Z53-3;Q70Z53	Protein FRA10AC1	FRA10AC1	sp|Q70Z53-2|F10C1_HUMAN Isoform 2 of Protein FRA10AC1 OS=Homo sapiens OX=9606 GN=FRA10AC1;sp|Q70Z53-4|F10C1_HUMAN Isoform 4 of Protein FRA10AC1 OS=Homo sapiens OX=9606 GN=FRA10AC1;sp|Q70Z53-5|F10C1_HUMAN Isoform 5 of Protein FRA10AC1 OS=Homo sapiens OX=960	3298.9	3535.4	1	5988	1384.2	8404.6	6586.2	4903.4	3404.6	2141	1285.5	1483.5	1543	2865.5	7069.6	4918.5	3577.8	3055.3	7583.8	8897	6531.8	5975.8	4971.9	3158	4892.3	5250.3	14125	16397	8046.8	6859
Q71DI3	Histone H3.2	HIST2H3A	sp|Q71DI3|H32_HUMAN Histone H3.2 OS=Homo sapiens OX=9606 GN=H3C15 PE=1 SV=3	27039	1	1	1	1	1	1	1	1	12500	14348	13874	16074	1	1	1	1	1	1	10246	70905	55651	6924.9	1	75383	73593	5330.5	1	27740	37351
Q71U36-2;Q71U36;P0DPH8;P0DPH7;P0DPH7-2;Q6PEY2	Tubulin alpha-1A chain	TUBA1A	sp|Q71U36-2|TBA1A_HUMAN Isoform 2 of Tubulin alpha-1A chain OS=Homo sapiens OX=9606 GN=TUBA1A;sp|Q71U36|TBA1A_HUMAN Tubulin alpha-1A chain OS=Homo sapiens OX=9606 GN=TUBA1A PE=1 SV=1;sp|P0DPH8|TBA3D_HUMAN Tubulin alpha-3D chain OS=Homo sapiens OX=9606 GN=T	80018	68219	40442	55509	40951	44127	43261	46650	115450	121340	113520	106210	122570	132750	78463	97956	93717	122820	126580	124280	107670	97089	137300	125510	103880	115320	97820	93669	77960	76466
Q71UI9;P0C0S5;Q71UI9-3;Q71UI9-4;Q71UI9-2	Histone H2A.V;Histone H2A.Z	H2AFV;H2AFZ	sp|Q71UI9|H2AV_HUMAN Histone H2A.V OS=Homo sapiens OX=9606 GN=H2AZ2 PE=1 SV=3;sp|P0C0S5|H2AZ_HUMAN Histone H2A.Z OS=Homo sapiens OX=9606 GN=H2AZ1 PE=1 SV=2;sp|Q71UI9-3|H2AV_HUMAN Isoform 3 of Histone H2A.V OS=Homo sapiens OX=9606 GN=H2AZ2;sp|Q71UI9-4|H2AV_	1	1	1	1	1	1	5824.6	2985.8	2921.1	1	3810.2	1	2720.6	2702.1	14253	11199	5721.6	9174.4	2830.3	2890.2	76266	68241	18192	12286	20015	17765	7685.6	14004	36617	39156
Q7L014	Probable ATP-dependent RNA helicase DDX46	DDX46	sp|Q7L014|DDX46_HUMAN Probable ATP-dependent RNA helicase DDX46 OS=Homo sapiens OX=9606 GN=DDX46 PE=1 SV=2	329300	324820	460680	483630	530570	508530	358390	355810	265140	262210	321040	330030	296130	293890	403250	392680	338510	331470	434070	434530	300510	312620	305850	312710	303830	296030	436670	445270	397180	383950
Q7L2H7-2;Q7L2H7	Eukaryotic translation initiation factor 3 subunit M	EIF3M	sp|Q7L2H7-2|EIF3M_HUMAN Isoform 2 of Eukaryotic translation initiation factor 3 subunit M OS=Homo sapiens OX=9606 GN=EIF3M;sp|Q7L2H7|EIF3M_HUMAN Eukaryotic translation initiation factor 3 subunit M OS=Homo sapiens OX=9606 GN=EIF3M PE=1 SV=1	10962	8024	6688.4	1	1	1	1	1	3694.3	2477.8	6546.9	5743.8	6854.2	8177.7	5918.4	5994.6	3041.2	8464.1	5869.9	6775.7	7074.7	6847.8	7157.7	7917.1	10140	10947	5181.3	3899.2	5757.3	7019.2
Q7L4I2-2;Q7L4I2	Arginine/serine-rich coiled-coil protein 2	RSRC2	sp|Q7L4I2-2|RSRC2_HUMAN Isoform 2 of Arginine/serine-rich coiled-coil protein 2 OS=Homo sapiens OX=9606 GN=RSRC2;sp|Q7L4I2|RSRC2_HUMAN Arginine/serine-rich coiled-coil protein 2 OS=Homo sapiens OX=9606 GN=RSRC2 PE=1 SV=1	42973	39542	62491	66004	74445	77108	49809	54227	35322	35901	46793	49922	40428	39348	61093	69160	49110	42805	83278	67073	43264	45576	37404	39872	36629	34610	58737	61361	53585	52599
Q7Z353;Q7Z353-2	Highly divergent homeobox	HDX	sp|Q7Z353|HDX_HUMAN Highly divergent homeobox OS=Homo sapiens OX=9606 GN=HDX PE=1 SV=1;sp|Q7Z353-2|HDX_HUMAN Isoform 2 of Highly divergent homeobox OS=Homo sapiens OX=9606 GN=HDX	122390	118300	142700	148690	148420	145590	77878	73454	48720	50580	71748	76128	78587	76306	94937	95014	109460	98645	103760	98358	83516	89229	104110	109400	98372	96954	129310	129720	131270	130380
Q7Z3J3;A6NKT7	RanBP2-like and GRIP domain-containing protein 4;RanBP2-like and GRIP domain-containing protein 3	RGPD4;RGPD3	sp|Q7Z3J3|RGPD4_HUMAN RanBP2-like and GRIP domain-containing protein 4 OS=Homo sapiens OX=9606 GN=RGPD4 PE=2 SV=3;sp|A6NKT7|RGPD3_HUMAN RanBP2-like and GRIP domain-containing protein 3 OS=Homo sapiens OX=9606 GN=RGPD3 PE=3 SV=2	1	1	1	1	1	1	3999.5	5514.4	9736.6	8774.8	5920.2	3867.7	3806.9	4317	1	1	3476.5	1	1	1	1	1	1	1	1	1	1	1	1	1
Q7Z3U7-2;Q7Z3U7-6;Q7Z3U7-5;Q7Z3U7	Protein MON2 homolog	MON2	sp|Q7Z3U7-2|MON2_HUMAN Isoform 2 of Protein MON2 homolog OS=Homo sapiens OX=9606 GN=MON2;sp|Q7Z3U7-6|MON2_HUMAN Isoform 6 of Protein MON2 homolog OS=Homo sapiens OX=9606 GN=MON2;sp|Q7Z3U7-5|MON2_HUMAN Isoform 5 of Protein MON2 homolog OS=Homo sapiens OX=96	1	1	1	1	1	1	1	1	12260	5200.8	4165.9	3408.2	2061.3	5089.9	1	1	1	1	1	1	1	1	1	1	1	1	1	1	1	1
Q7Z417;Q7Z417-2	Nuclear fragile X mental retardation-interacting protein 2	NUFIP2	sp|Q7Z417|NUFP2_HUMAN Nuclear fragile X mental retardation-interacting protein 2 OS=Homo sapiens OX=9606 GN=NUFIP2 PE=1 SV=1	25830	23203	27028	33671	34080	33801	18977	20778	13800	12346	12637	11506	18602	18783	29031	32117	24523	19457	37484	26879	19114	20750	21633	22196	10409	10961	21056	19752	20309	19533
Q7Z4Q2;Q7Z4Q2-2	HEAT repeat-containing protein 3	HEATR3	sp|Q7Z4Q2|HEAT3_HUMAN HEAT repeat-containing protein 3 OS=Homo sapiens OX=9606 GN=HEATR3 PE=1 SV=2;sp|Q7Z4Q2-2|HEAT3_HUMAN Isoform 2 of HEAT repeat-containing protein 3 OS=Homo sapiens OX=9606 GN=HEATR3	1	1	1	1	1	1	1	6746.8	9146.5	7060.4	3624.8	1	2412.4	3462.5	1213.6	9455.2	1	1	1	1	1	1	1	1	1	1	1	1	1	1
Q7Z4V5-2;Q7Z4V5;Q7Z4V5-4;Q7Z4V5-3	Hepatoma-derived growth factor-related protein 2	HDGFRP2	sp|Q7Z4V5-2|HDGR2_HUMAN Isoform 2 of Hepatoma-derived growth factor-related protein 2 OS=Homo sapiens OX=9606 GN=HDGFL2;sp|Q7Z4V5|HDGR2_HUMAN Hepatoma-derived growth factor-related protein 2 OS=Homo sapiens OX=9606 GN=HDGFL2 PE=1 SV=1;sp|Q7Z4V5-4|HDGR2_HUM	10220	10813	1	8335.6	1	13133	9742.8	10743	1	4558.3	6465.5	5378	9045.9	7556.7	15030	16627	8469.1	5630.1	20428	16669	11240	11825	8077.3	6085.3	7738.5	8647.3	14770	15515	11757	10932
Q7Z6E9-4;Q7Z6E9-2;Q7Z6E9	E3 ubiquitin-protein ligase RBBP6	RBBP6	sp|Q7Z6E9-4|RBBP6_HUMAN Isoform 4 of E3 ubiquitin-protein ligase RBBP6 OS=Homo sapiens OX=9606 GN=RBBP6;sp|Q7Z6E9-2|RBBP6_HUMAN Isoform 2 of E3 ubiquitin-protein ligase RBBP6 OS=Homo sapiens OX=9606 GN=RBBP6;sp|Q7Z6E9|RBBP6_HUMAN E3 ubiquitin-protein ligas	102940	108670	184170	169860	162130	155610	85679	66922	67092	53275	53223	61323	98808	103580	154820	180140	111910	128890	208500	171600	119910	115580	135790	134520	85312	88794	150670	161940	147790	142340
Q7Z7C8;Q7Z7C8-2;Q7Z7C8-4	Transcription initiation factor TFIID subunit 8	TAF8	sp|Q7Z7C8|TAF8_HUMAN Transcription initiation factor TFIID subunit 8 OS=Homo sapiens OX=9606 GN=TAF8 PE=1 SV=1;sp|Q7Z7C8-2|TAF8_HUMAN Isoform 2 of Transcription initiation factor TFIID subunit 8 OS=Homo sapiens OX=9606 GN=TAF8;sp|Q7Z7C8-4|TAF8_HUMAN Isofor	59371	55830	85214	75320	83766	84212	70288	64611	52824	48149	53270	57567	73893	71048	83274	92195	62346	57296	92964	75046	67373	65685	67502	62996	56548	61921	78206	77132	61576	64119
Q7Z7F7;Q7Z7F7-2	39S ribosomal protein L55, mitochondrial	MRPL55	sp|Q7Z7F7|RM55_HUMAN 39S ribosomal protein L55, mitochondrial OS=Homo sapiens OX=9606 GN=MRPL55 PE=1 SV=1;sp|Q7Z7F7-2|RM55_HUMAN Isoform 2 of 39S ribosomal protein L55, mitochondrial OS=Homo sapiens OX=9606 GN=MRPL55	6031.6	6681.7	5497.7	11006	8671.2	7310.8	8423.9	7782.7	4931.2	5080.7	5412	5452.9	6292.5	5837.4	9214.8	3635.6	3645.2	1	1	8869.9	7633.3	6640.5	5451.4	5941.8	7199.4	7131.4	8196.4	10177	8702.1	7470.4
Q7Z7K6;Q7Z7K6-3;Q7Z7K6-2	Centromere protein V	CENPV	sp|Q7Z7K6|CENPV_HUMAN Centromere protein V OS=Homo sapiens OX=9606 GN=CENPV PE=1 SV=1;sp|Q7Z7K6-3|CENPV_HUMAN Isoform 3 of Centromere protein V OS=Homo sapiens OX=9606 GN=CENPV;sp|Q7Z7K6-2|CENPV_HUMAN Isoform 2 of Centromere protein V OS=Homo sapiens OX=96	1	1	1	1	1	1	1	1	1	1	1	1	1	1	1	1	1	1	1	1	10992	10099	1	1	1	1	1	1	1	1
Q86UY6;Q86UY6-3;Q86UY6-4	N-alpha-acetyltransferase 40	NAA40	sp|Q86UY6|NAA40_HUMAN N-alpha-acetyltransferase 40 OS=Homo sapiens OX=9606 GN=NAA40 PE=1 SV=1;sp|Q86UY6-3|NAA40_HUMAN Isoform 2 of N-alpha-acetyltransferase 40 OS=Homo sapiens OX=9606 GN=NAA40;sp|Q86UY6-4|NAA40_HUMAN Isoform 3 of N-alpha-acetyltransferase	6004.8	1108.2	9750.9	10789	1	4763.6	5455.7	5582.9	5699.1	5596.4	11228	7114	8494.4	8662.1	15520	18123	6909.9	8360.7	15026	13603	14435	11541	9433.6	8907.5	7196.8	7565.3	10408	10420	10269	11828
Q86V81	THO complex subunit 4	ALYREF	sp|Q86V81|THOC4_HUMAN THO complex subunit 4 OS=Homo sapiens OX=9606 GN=ALYREF PE=1 SV=3	109260	123490	143710	151740	153170	140730	96002	82853	64040	68656	66166	62340	62876	62630	93341	102320	87510	89302	106880	98351	81642	75928	77753	73460	85732	91086	107330	118240	83689	85475
Q86VP6;Q86VP6-2;Q86VP6-3	Cullin-associated NEDD8-dissociated protein 1	CAND1	sp|Q86VP6|CAND1_HUMAN Cullin-associated NEDD8-dissociated protein 1 OS=Homo sapiens OX=9606 GN=CAND1 PE=1 SV=2;sp|Q86VP6-2|CAND1_HUMAN Isoform 2 of Cullin-associated NEDD8-dissociated protein 1 OS=Homo sapiens OX=9606 GN=CAND1	4866.3	2804.7	1	1	1	1	61486	53650	95587	92033	57165	53127	44278	46159	32721	32428	29121	35874	12180	12428	10570	10024	12125	8822.7	8553.3	10658	6703.1	8533.6	4847.6	4811.6
Q86WX3	Active regulator of SIRT1	RPS19BP1	sp|Q86WX3|AROS_HUMAN Active regulator of SIRT1 OS=Homo sapiens OX=9606 GN=RPS19BP1 PE=1 SV=1	32271	36085	37287	41470	37675	33847	46866	49489	32385	31131	8488.3	6984.4	18430	16401	30933	26989	22883	19962	30961	39318	36638	36868	24605	22312	36237	34875	52287	53190	40117	37741
Q86X95;Q86X95-2	Corepressor interacting with RBPJ 1	CIR1	sp|Q86X95|CIR1_HUMAN Corepressor interacting with RBPJ 1 OS=Homo sapiens OX=9606 GN=CIR1 PE=1 SV=1;sp|Q86X95-2|CIR1_HUMAN Isoform 2 of Corepressor interacting with RBPJ 1 OS=Homo sapiens OX=9606 GN=CIR1	2455.6	1	1	1	1	1	1	1	1	1	1	1	1	4837.9	6571.3	5782	6000.2	1	1	6519.7	5175.4	5259.9	1	5236	4169.4	4528.2	6304.1	4870.5	6178.3	6128.7
Q86XP3-2;Q86XP3	ATP-dependent RNA helicase DDX42	DDX42	sp|Q86XP3-2|DDX42_HUMAN Isoform 2 of ATP-dependent RNA helicase DDX42 OS=Homo sapiens OX=9606 GN=DDX42;sp|Q86XP3|DDX42_HUMAN ATP-dependent RNA helicase DDX42 OS=Homo sapiens OX=9606 GN=DDX42 PE=1 SV=1	7308.7	1	1	10591	1	1	7206	8067	4241.2	3359.1	2658.2	4237.2	4530	4582.5	9444.7	7027.4	1	4805	1	10211	5752.2	6165.6	6844.9	1	4944.9	3462.3	7951.1	8053.5	1	6376.8
Q86YS7;Q86YS7-2;Q86YS7-3;Q86YS7-4;Q86YS7-5	C2 domain-containing protein 5	C2CD5	sp|Q86YS7|C2CD5_HUMAN C2 domain-containing protein 5 OS=Homo sapiens OX=9606 GN=C2CD5 PE=1 SV=1;sp|Q86YS7-2|C2CD5_HUMAN Isoform 2 of C2 domain-containing protein 5 OS=Homo sapiens OX=9606 GN=C2CD5;sp|Q86YS7-3|C2CD5_HUMAN Isoform 3 of C2 domain-containing p	1	1	1	1	1	1	11426	13233	26122	29293	19992	20947	15600	13440	4584.1	9701.6	7569.5	4289.4	1	1	968.2	698.84	944.1	397.04	2555.9	2618.5	950.97	1	1	827.1
Q8IUE6	Histone H2A type 2-B	HIST2H2AB	sp|Q8IUE6|H2A2B_HUMAN Histone H2A type 2-B OS=Homo sapiens OX=9606 GN=H2AC21 PE=1 SV=3	1	1	1	1	1	1	1	1	1	1	1	1	1	1	2317.5	1	2218	1	1	1	10501	10647	1	1	1	1	1	1	6342.5	7130.3
Q8IVP5	FUN14 domain-containing protein 1	FUNDC1	sp|Q8IVP5|FUND1_HUMAN FUN14 domain-containing protein 1 OS=Homo sapiens OX=9606 GN=FUNDC1 PE=1 SV=1	1	1	1	1	1	1	1	1	6257.7	5036.4	6378.5	7277.9	8065.4	6446.1	1	1	13941	13143	1	1	1	1	1	3296.2	6750	7721.1	9712.1	6273.6	1	1
Q8IWS0-5;Q8IWS0-3;Q8IWS0;Q8IWS0-4;Q8IWS0-2	PHD finger protein 6	PHF6	sp|Q8IWS0-5|PHF6_HUMAN Isoform 5 of PHD finger protein 6 OS=Homo sapiens OX=9606 GN=PHF6;sp|Q8IWS0-3|PHF6_HUMAN Isoform 3 of PHD finger protein 6 OS=Homo sapiens OX=9606 GN=PHF6;sp|Q8IWS0|PHF6_HUMAN PHD finger protein 6 OS=Homo sapiens OX=9606 GN=PHF6 PE=1	199520	175320	247730	275020	296140	304020	239360	235980	148410	157360	131590	141100	119770	112440	207450	224200	199270	175770	304800	242830	179210	188680	160790	167590	184710	181620	282110	295570	238370	216850
Q8IWX8	Calcium homeostasis endoplasmic reticulum protein	CHERP	sp|Q8IWX8|CHERP_HUMAN Calcium homeostasis endoplasmic reticulum protein OS=Homo sapiens OX=9606 GN=CHERP PE=1 SV=3	93127	93126	108270	119440	113700	116010	80791	83445	54945	53100	65535	67324	71104	70888	98770	93748	83786	76252	114750	114410	76270	79993	75836	80979	72576	71370	100310	99999	92140	92050
Q8IX18-4;Q8IX18-3;Q8IX18-2;Q8IX18	Probable ATP-dependent RNA helicase DHX40	DHX40	sp|Q8IX18-4|DHX40_HUMAN Isoform 4 of Probable ATP-dependent RNA helicase DHX40 OS=Homo sapiens OX=9606 GN=DHX40;sp|Q8IX18-3|DHX40_HUMAN Isoform 3 of Probable ATP-dependent RNA helicase DHX40 OS=Homo sapiens OX=9606 GN=DHX40;sp|Q8IX18-2|DHX40_HUMAN Isoform	1	1	1	1	5098.6	6354.4	4746.9	4993.3	4454.9	4669.5	2577.2	1	3996.2	4115.6	9580.3	12472	3475.5	1	10435	9276.6	8041.4	7900.5	1	6301.1	6373.9	4285.4	9880.3	14001	10621	9815.6
Q8IXB1;Q8IXB1-2	DnaJ homolog subfamily C member 10	DNAJC10	sp|Q8IXB1|DJC10_HUMAN DnaJ homolog subfamily C member 10 OS=Homo sapiens OX=9606 GN=DNAJC10 PE=1 SV=2;sp|Q8IXB1-2|DJC10_HUMAN Isoform 2 of DnaJ homolog subfamily C member 10 OS=Homo sapiens OX=9606 GN=DNAJC10	1009.2	7424.3	9193.3	11330	7788.5	7709	9407	11730	3284.9	6979.5	9618.1	11420	9832.6	9855.1	9578.9	7051	10689	10020	6296.1	8576.3	7820	7551.9	9579.2	9670.2	8493.6	5538.3	5370.4	6354.7	9639.3	10063
Q8IY81	pre-rRNA processing protein FTSJ3	FTSJ3	sp|Q8IY81|SPB1_HUMAN pre-rRNA 2-O-ribose RNA methyltransferase FTSJ3 OS=Homo sapiens OX=9606 GN=FTSJ3 PE=1 SV=2	1	1	1	1	1	1	1	1	1	1	1	1	1	1	1678.3	1152	1	1	1	1	9896.4	8392	1	1	1	1	1	1	1571.4	3856.5
Q8IYB3-2;Q8IYB3	Serine/arginine repetitive matrix protein 1	SRRM1	sp|Q8IYB3-2|SRRM1_HUMAN Isoform 2 of Serine/arginine repetitive matrix protein 1 OS=Homo sapiens OX=9606 GN=SRRM1;sp|Q8IYB3|SRRM1_HUMAN Serine/arginine repetitive matrix protein 1 OS=Homo sapiens OX=9606 GN=SRRM1 PE=1 SV=2	1	1	1	1	1	1	1	1	1	1	1	1	1	3424.6	7604.3	7664.6	734.68	1	1977	8792.1	10467	14277	2951.1	2003	1703.3	1	1	1	1	504.75
Q8IZ07	Ankyrin repeat domain-containing protein 13A	ANKRD13A	sp|Q8IZ07|AN13A_HUMAN Ankyrin repeat domain-containing protein 13A OS=Homo sapiens OX=9606 GN=ANKRD13A PE=1 SV=3	1	1	1	1	1	1	1	7797.1	4535.6	5624	7424.2	5929.5	4717.4	4646.6	3303.1	4202.9	3335.3	1	1	2661.8	1562.8	2115.7	1601.6	1	1	1	1	1	1	1
Q8N1F7;Q8N1F7-2	Nuclear pore complex protein Nup93	NUP93	sp|Q8N1F7|NUP93_HUMAN Nuclear pore complex protein Nup93 OS=Homo sapiens OX=9606 GN=NUP93 PE=1 SV=2;sp|Q8N1F7-2|NUP93_HUMAN Isoform 2 of Nuclear pore complex protein Nup93 OS=Homo sapiens OX=9606 GN=NUP93	1	1	1	1	1	1	71372	77761	110680	113230	63759	59217	44154	40789	28860	30563	31864	30862	11520	10716	10651	10114	8419.3	7579.6	6925.3	4788.8	11974	10654	4953.3	6847.9
Q8N490-2		PNKD	sp|Q8N490-2|PNKD_HUMAN Isoform 2 of Probable hydrolase PNKD OS=Homo sapiens OX=9606 GN=PNKD	1	1	1	1	1	1	10378	11491	9703.6	9147	6355.9	5599.8	5595.2	5832.2	5776.9	7294.1	7178.1	5317.8	6065.5	4545.3	3318.5	4472.5	2856.7	3461.4	1	1	1	1	1	1
Q8N5F7;Q5M9Q1	NF-kappa-B-activating protein	NKAP	sp|Q8N5F7|NKAP_HUMAN NF-kappa-B-activating protein OS=Homo sapiens OX=9606 GN=NKAP PE=1 SV=1	101610	103190	145420	159400	157130	155810	147740	154570	107720	104770	99254	108350	129580	118510	143150	136870	140900	126810	144580	135990	112230	113230	110840	110700	95336	94723	157980	171980	141160	139420
Q8N653	Leucine-zipper-like transcriptional regulator 1	LZTR1	sp|Q8N653|LZTR1_HUMAN Leucine-zipper-like transcriptional regulator 1 OS=Homo sapiens OX=9606 GN=LZTR1 PE=1 SV=2	1	1	1	1	1	1	3225.5	6338.2	8062.3	7801.9	5619.5	3490.6	2250.7	2646.9	910.94	1	2902.3	1	1	1	1	1	1	1	1	1	1	1	1	1
Q8N684-2;Q8N684;Q8N684-3	Cleavage and polyadenylation specificity factor subunit 7	CPSF7	sp|Q8N684-2|CPSF7_HUMAN Isoform 2 of Cleavage and polyadenylation specificity factor subunit 7 OS=Homo sapiens OX=9606 GN=CPSF7;sp|Q8N684|CPSF7_HUMAN Cleavage and polyadenylation specificity factor subunit 7 OS=Homo sapiens OX=9606 GN=CPSF7 PE=1 SV=1;sp|Q8	73664	69528	95758	97973	120140	115890	72112	75041	51851	53237	49098	48179	61548	64355	84663	99513	69402	68279	108170	103900	69896	70268	62606	64495	68854	67886	107490	109830	83219	78137
Q8N8Y2	V-type proton ATPase subunit d 2	ATP6V0D2	sp|Q8N8Y2|VA0D2_HUMAN V-type proton ATPase subunit d 2 OS=Homo sapiens OX=9606 GN=ATP6V0D2 PE=1 SV=1	1	1	1	1	1	1	1373.8	8366.5	34311	30663	43395	41728	15925	20518	5572.9	1	6363	9253	1	1	1	1	1	1	6818.1	8089.4	1	1	1	1
Q8N9Q2	Protein SREK1IP1	SREK1IP1	sp|Q8N9Q2|SR1IP_HUMAN Protein SREK1IP1 OS=Homo sapiens OX=9606 GN=SREK1IP1 PE=1 SV=1	105070	110260	57303	55001	63554	66556	49688	44977	49978	54393	39794	42952	54441	55293	34960	37042	71371	61658	71207	50869	46094	46485	79549	93306	76784	76325	68230	66038	52389	51288
Q8NAV1	Pre-mRNA-splicing factor 38A	PRPF38A	sp|Q8NAV1|PR38A_HUMAN Pre-mRNA-splicing factor 38A OS=Homo sapiens OX=9606 GN=PRPF38A PE=1 SV=1	106690	82028	62709	84414	75678	85854	36899	68866	59922	48402	108700	111790	49872	43972	65714	77301	52977	61630	119550	91432	60028	67038	75503	78583	85935	73647	84597	76734	66613	67304
Q8NBM4-4;Q8NBM4-3;Q8NBM4-2;Q8NBM4	Ubiquitin-associated domain-containing protein 2	UBAC2	sp|Q8NBM4-4|UBAC2_HUMAN Isoform 4 of Ubiquitin-associated domain-containing protein 2 OS=Homo sapiens OX=9606 GN=UBAC2;sp|Q8NBM4-3|UBAC2_HUMAN Isoform 3 of Ubiquitin-associated domain-containing protein 2 OS=Homo sapiens OX=9606 GN=UBAC2;sp|Q8NBM4-2|UBAC2_	1	1	1	1	1	1	1	1	4548.4	3403.5	3179.3	2360.7	2070.9	3494.8	1	6092.8	1	1	1	3220.6	3847.4	3120.1	3479.5	1	1	1636.9	1	1	1	1
Q8NC51-2;Q8NC51;Q8NC51-4;Q8NC51-3	Plasminogen activator inhibitor 1 RNA-binding protein	SERBP1	sp|Q8NC51-2|PAIRB_HUMAN Isoform 2 of Plasminogen activator inhibitor 1 RNA-binding protein OS=Homo sapiens OX=9606 GN=SERBP1;sp|Q8NC51|PAIRB_HUMAN Plasminogen activator inhibitor 1 RNA-binding protein OS=Homo sapiens OX=9606 GN=SERBP1 PE=1 SV=2;sp|Q8NC51-4	13067	10116	1	6426.4	2438.2	1	9616.4	12127	11971	12504	26643	27045	21714	20306	18697	22579	16626	15157	17259	13863	17461	18203	16275	17103	13683	13879	9503.1	8357.2	15691	15566
Q8NCE2;Q8NCE2-2;Q8NCE2-3	Myotubularin-related protein 14	MTMR14	sp|Q8NCE2|MTMRE_HUMAN Myotubularin-related protein 14 OS=Homo sapiens OX=9606 GN=MTMR14 PE=1 SV=2;sp|Q8NCE2-2|MTMRE_HUMAN Isoform 2 of Myotubularin-related protein 14 OS=Homo sapiens OX=9606 GN=MTMR14;sp|Q8NCE2-3|MTMRE_HUMAN Isoform 3 of Myotubularin-relat	5978.1	3390.3	1	1	1	1	1	3417.7	3390.7	3457.8	5697	5563.1	6110.7	7284.7	5662.4	7655.2	4549.8	6387	12201	12221	12277	10787	12007	12571	16181	15235	15684	16922	24805	28595
Q8ND56-3;Q8ND56-2;Q8ND56	Protein LSM14 homolog A	LSM14A	sp|Q8ND56-3|LS14A_HUMAN Isoform 3 of Protein LSM14 homolog A OS=Homo sapiens OX=9606 GN=LSM14A;sp|Q8ND56-2|LS14A_HUMAN Isoform 2 of Protein LSM14 homolog A OS=Homo sapiens OX=9606 GN=LSM14A;sp|Q8ND56|LS14A_HUMAN Protein LSM14 homolog A OS=Homo sapiens OX=9	23309	21678	20988	20987	18323	16533	16604	15225	13573	12976	16219	16210	16550	15876	16306	10715	15558	20759	6466.9	16070	16282	17193	19782	18080	13122	14090	20918	23206	18661	17730
Q8NDD1-6;Q8NDD1;Q8NDD1-5	Uncharacterized protein C1orf131	C1orf131	sp|Q8NDD1-6|CA131_HUMAN Isoform 3 of Uncharacterized protein C1orf131 OS=Homo sapiens OX=9606 GN=C1orf131;sp|Q8NDD1|CA131_HUMAN Uncharacterized protein C1orf131 OS=Homo sapiens OX=9606 GN=C1orf131 PE=1 SV=4;sp|Q8NDD1-5|CA131_HUMAN Isoform 2 of Uncharacteri	18014	12429	22741	25299	24343	28436	17239	20642	11203	11440	10235	8935.2	12455	12454	24829	31278	20170	15667	32292	22513	16441	17921	15463	15494	11902	14418	22174	23095	19748	18013
Q8NE71-2;Q8NE71	ATP-binding cassette sub-family F member 1	ABCF1	sp|Q8NE71-2|ABCF1_HUMAN Isoform 2 of ATP-binding cassette sub-family F member 1 OS=Homo sapiens OX=9606 GN=ABCF1;sp|Q8NE71|ABCF1_HUMAN ATP-binding cassette sub-family F member 1 OS=Homo sapiens OX=9606 GN=ABCF1 PE=1 SV=2	38011	39411	52900	62350	69758	70517	57245	58012	37615	40147	31689	31763	33367	34406	56397	58795	42388	38860	80181	73732	50468	52173	38627	38982	44920	42492	74189	78850	51086	48713
Q8NE86-3;Q8NE86;Q8NE86-2	Calcium uniporter protein, mitochondrial	MCU	sp|Q8NE86-3|MCU_HUMAN Isoform 3 of Calcium uniporter protein, mitochondrial OS=Homo sapiens OX=9606 GN=MCU;sp|Q8NE86|MCU_HUMAN Calcium uniporter protein, mitochondrial OS=Homo sapiens OX=9606 GN=MCU PE=1 SV=1;sp|Q8NE86-2|MCU_HUMAN Isoform 2 of Calcium unip	1	1	1	1	1	1	37298	39924	44514	40795	42035	40779	30109	29447	14442	9260.6	17094	17467	1	1	1	1	1	1	5731.4	4633.8	2078.2	2322.9	1	1
Q8NFH3;Q8NFH3-2	Nucleoporin Nup43	NUP43	sp|Q8NFH3|NUP43_HUMAN Nucleoporin Nup43 OS=Homo sapiens OX=9606 GN=NUP43 PE=1 SV=1;sp|Q8NFH3-2|NUP43_HUMAN Isoform 2 of Nucleoporin Nup43 OS=Homo sapiens OX=9606 GN=NUP43	1	1	1	1	1	1	2808.4	2430.3	8441.2	3483.6	2213.9	2297.7	2742	2734.8	1821.7	2034.1	1	2160.4	1	1	1	1	1	1	1	1	1	1	1	1
Q8NHQ1-2;Q8NHQ1;Q8NHQ1-4;Q8NHQ1-5;Q8NHQ1-3	Centrosomal protein of 70 kDa	CEP70	sp|Q8NHQ1-2|CEP70_HUMAN Isoform 2 of Centrosomal protein of 70 kDa OS=Homo sapiens OX=9606 GN=CEP70;sp|Q8NHQ1|CEP70_HUMAN Centrosomal protein of 70 kDa OS=Homo sapiens OX=9606 GN=CEP70 PE=1 SV=2;sp|Q8NHQ1-4|CEP70_HUMAN Isoform 4 of Centrosomal protein of 7	101940	98237	109480	112540	112240	117040	99552	97408	66469	65824	80687	84915	83540	81767	108500	115030	119170	114790	118300	105490	92189	95324	107160	111500	101470	96669	140360	141060	136530	129010
Q8NHQ9	ATP-dependent RNA helicase DDX55	DDX55	sp|Q8NHQ9|DDX55_HUMAN ATP-dependent RNA helicase DDX55 OS=Homo sapiens OX=9606 GN=DDX55 PE=1 SV=3	1	1445.3	1	1	1	1	1	1	1	1	1	1	1	1216	1	1	1	1	1	1	1	2173.2	2736.6	1621.9	1475.6	2684.8	1	1	1	1
Q8NI27;Q8NI27-2	THO complex subunit 2	THOC2	sp|Q8NI27|THOC2_HUMAN THO complex subunit 2 OS=Homo sapiens OX=9606 GN=THOC2 PE=1 SV=2	35485	41274	30074	40391	40885	42556	62235	61939	45258	44644	38625	39494	26809	27472	38318	40348	24017	18430	46476	42368	29451	33527	25492	27991	35823	37478	38378	32440	25647	29523
Q8TA86	Retinitis pigmentosa 9 protein	RP9	sp|Q8TA86|RP9_HUMAN Retinitis pigmentosa 9 protein OS=Homo sapiens OX=9606 GN=RP9 PE=1 SV=2	83351	81016	98659	105820	116250	115710	92519	88637	75937	77820	73339	74369	84170	82973	103150	87160	118520	101770	77191	84636	67397	70286	82438	84122	75495	73026	111110	114540	97208	93249
Q8TAD8	Smad nuclear-interacting protein 1	SNIP1	sp|Q8TAD8|SNIP1_HUMAN Smad nuclear-interacting protein 1 OS=Homo sapiens OX=9606 GN=SNIP1 PE=1 SV=1	1	1	1	2525.8	4828.9	4346.1	3486.9	1	4598.3	1	8289.2	8528.7	2756	4138.8	7878.1	4336.2	3044.4	4497.7	3211.7	7619.3	8594.9	6937	5331.5	4030.9	5142	4997.7	10791	11892	5307.3	5846.9
Q8TBB5;Q8TBB5-3;Q8TBB5-2	Kelch domain-containing protein 4	KLHDC4	sp|Q8TBB5|KLDC4_HUMAN Kelch domain-containing protein 4 OS=Homo sapiens OX=9606 GN=KLHDC4 PE=1 SV=1;sp|Q8TBB5-3|KLDC4_HUMAN Isoform 3 of Kelch domain-containing protein 4 OS=Homo sapiens OX=9606 GN=KLHDC4;sp|Q8TBB5-2|KLDC4_HUMAN Isoform 2 of Kelch domain-c	24738	19294	29721	27998	22204	19393	17924	18181	19064	18559	17202	15084	14508	16947	21859	28011	20271	18415	37716	38193	31755	28533	23958	24293	28576	28410	43516	45001	30504	31303
Q8TBK6-2;Q8TBK6	Zinc finger CCHC domain-containing protein 10	ZCCHC10	sp|Q8TBK6-2|ZCH10_HUMAN Isoform 2 of Zinc finger CCHC domain-containing protein 10 OS=Homo sapiens OX=9606 GN=ZCCHC10;sp|Q8TBK6|ZCH10_HUMAN Zinc finger CCHC domain-containing protein 10 OS=Homo sapiens OX=9606 GN=ZCCHC10 PE=1 SV=1	1	3339.6	1	1	1	1	4932.4	4146.5	4127.7	4431.6	1	1687	3777.1	2847.1	4142	4506.6	1	4372.8	1	3195.5	3190.2	3892.8	1	2364.9	3563.3	3042.6	4759.3	5466.7	1	1
Q8TCU4;Q8TCU4-2;Q8TCU4-3	Alstrom syndrome protein 1	ALMS1	sp|Q8TCU4|ALMS1_HUMAN Alstrom syndrome protein 1 OS=Homo sapiens OX=9606 GN=ALMS1 PE=1 SV=4;sp|Q8TCU4-2|ALMS1_HUMAN Isoform 2 of Alstrom syndrome protein 1 OS=Homo sapiens OX=9606 GN=ALMS1;sp|Q8TCU4-3|ALMS1_HUMAN Isoform 3 of Alstrom syndrome protein 1 OS=	20645	22480	18295	32174	26029	26007	1	1	1	1	1	1	1	1	1091.5	1	1	1	4443.8	8921.1	11940	11154	8377.4	9888.4	3622.3	2162.2	1	3499.6	7385.2	9835.4
Q8TDY2-2;Q8TDY2	RB1-inducible coiled-coil protein 1	RB1CC1	sp|Q8TDY2-2|RBCC1_HUMAN Isoform 2 of RB1-inducible coiled-coil protein 1 OS=Homo sapiens OX=9606 GN=RB1CC1;sp|Q8TDY2|RBCC1_HUMAN RB1-inducible coiled-coil protein 1 OS=Homo sapiens OX=9606 GN=RB1CC1 PE=1 SV=3	1	6519.6	1	1	1	1	1	1	3550.1	1	6243.5	4449.5	7694.7	8014.7	5463.6	1	5746.3	3913.1	1	7184	5640.7	5402.4	9204.7	9040.1	7963.7	8262.9	1	9081.9	6387.3	7832.1
Q8TEX9;Q8TEX9-2	Importin-4	IPO4	sp|Q8TEX9|IPO4_HUMAN Importin-4 OS=Homo sapiens OX=9606 GN=IPO4 PE=1 SV=2;sp|Q8TEX9-2|IPO4_HUMAN Isoform 2 of Importin-4 OS=Homo sapiens OX=9606 GN=IPO4	1	1	1	1	1	1	418220	420410	1004500	1012500	534890	520400	281290	255260	105280	109580	180970	200230	14399	16465	12114	13442	8578.8	10508	15963	19270	32954	33516	8196.3	8527.1
Q8TF72	Protein Shroom3	SHROOM3	sp|Q8TF72|SHRM3_HUMAN Protein Shroom3 OS=Homo sapiens OX=9606 GN=SHROOM3 PE=1 SV=2	15704	14799	1	1	1	1	1	1	7801.7	1	14380	11354	16230	16547	1	6811.2	1	1	1	1	4510.1	8229.9	6336.1	8837	7123.3	1	5702.6	1	21564	1
Q8WUA2	Peptidyl-prolyl cis-trans isomerase-like 4	PPIL4	sp|Q8WUA2|PPIL4_HUMAN Peptidyl-prolyl cis-trans isomerase-like 4 OS=Homo sapiens OX=9606 GN=PPIL4 PE=1 SV=1	555860	544100	756310	768780	826210	780770	637270	652930	478990	474500	453170	471560	499940	500290	654550	636490	593150	544920	728030	744610	511260	540700	522110	533090	578020	570540	814510	834770	688080	664000
Q8WUM0	Nuclear pore complex protein Nup133	NUP133	sp|Q8WUM0|NU133_HUMAN Nuclear pore complex protein Nup133 OS=Homo sapiens OX=9606 GN=NUP133 PE=1 SV=2	1	1	1	1	1	1	1	1	1	1177.3	2894	1	1	2544	1	1	1	1	1	1	1	1	1	1	1	1	1	1	1	1
Q8WUQ7;Q8WUQ7-2	Cactin	CACTIN	sp|Q8WUQ7|CATIN_HUMAN Cactin OS=Homo sapiens OX=9606 GN=CACTIN PE=1 SV=3;sp|Q8WUQ7-2|CATIN_HUMAN Isoform 2 of Cactin OS=Homo sapiens OX=9606 GN=CACTIN	10791	9688.7	7334.5	14634	15614	18837	13188	13902	8416.6	8619.2	9208.4	7679.6	12702	12261	18108	17888	9302.9	8623.4	21999	16691	12716	12840	10787	10464	10226	9393.2	15813	16577	15178	14300
Q8WVK2	U4/U6.U5 small nuclear ribonucleoprotein 27 kDa protein	SNRNP27	sp|Q8WVK2|SNR27_HUMAN U4/U6.U5 small nuclear ribonucleoprotein 27 kDa protein OS=Homo sapiens OX=9606 GN=SNRNP27 PE=1 SV=1	562440	546110	763660	793670	882930	823050	654340	647770	459100	454880	436480	428880	404780	398120	595580	574120	652790	664920	620020	639310	499930	519870	512420	515650	526890	511700	763070	787060	673630	641690
Q8WVS4	WD repeat-containing protein 60	WDR60	sp|Q8WVS4|WDR60_HUMAN WD repeat-containing protein 60 OS=Homo sapiens OX=9606 GN=WDR60 PE=1 SV=3	10255	7492.3	3338.6	5878.3	8126.1	8027.9	9381.5	9047	8057.5	4595.6	5806.4	6515.3	7728.7	7242.1	11747	9394.1	6612.4	7023.8	8868.2	11137	9461.4	9701.6	7742.1	7771.2	9242.3	8761	10741	13911	8976.4	9821
Q8WVX9	Fatty acyl-CoA reductase 1	FAR1	sp|Q8WVX9|FACR1_HUMAN Fatty acyl-CoA reductase 1 OS=Homo sapiens OX=9606 GN=FAR1 PE=1 SV=1	759.61	1	1	1	1	1	2972.1	6593.8	8441.5	8994.4	7089.3	6480.1	3238.8	2869.1	3322.2	3426.2	2333.5	4013.7	1	3087.1	2865.2	1	2546.3	2447.2	1	1048.5	1788.1	1	1	1009.7
Q8WWM7-7;Q8WWM7-6;Q8WWM7-8;Q8WWM7-5;Q8WWM7-4;Q8WWM7-9;Q8WWM7-2;Q8WWM7;Q8WWM7-3	Ataxin-2-like protein	ATXN2L	sp|Q8WWM7-7|ATX2L_HUMAN Isoform 7 of Ataxin-2-like protein OS=Homo sapiens OX=9606 GN=ATXN2L;sp|Q8WWM7-6|ATX2L_HUMAN Isoform 6 of Ataxin-2-like protein OS=Homo sapiens OX=9606 GN=ATXN2L;sp|Q8WWM7-8|ATX2L_HUMAN Isoform 8 of Ataxin-2-like protein OS=Homo sap	1	1	1	6760.6	1	5647.6	7384.9	10634	6866.6	7460.1	6095.9	1	4929.2	4671.7	9332.5	8675.8	5996	4566.6	1	5656.3	6658.5	4724.9	6531.4	7136.7	4005.2	1	5313.1	5432.9	6211.5	6289.8
Q8WWY3;Q8WWY3-4;Q8WWY3-2;Q8WWY3-3	U4/U6 small nuclear ribonucleoprotein Prp31	PRPF31	sp|Q8WWY3|PRP31_HUMAN U4/U6 small nuclear ribonucleoprotein Prp31 OS=Homo sapiens OX=9606 GN=PRPF31 PE=1 SV=2;sp|Q8WWY3-4|PRP31_HUMAN Isoform 4 of U4/U6 small nuclear ribonucleoprotein Prp31 OS=Homo sapiens OX=9606 GN=PRPF31;sp|Q8WWY3-2|PRP31_HUMAN Isoform	89851	85183	111960	122430	101230	105690	68426	66384	51510	45637	63402	62643	74786	73000	86470	89065	83221	84884	153160	141430	138670	140330	154170	160430	138330	136910	179110	178550	298360	292250
Q8WXA9-2;Q8WXA9	Splicing regulatory glutamine/lysine-rich protein 1	SREK1	sp|Q8WXA9-2|SREK1_HUMAN Isoform 2 of Splicing regulatory glutamine/lysine-rich protein 1 OS=Homo sapiens OX=9606 GN=SREK1;sp|Q8WXA9|SREK1_HUMAN Splicing regulatory glutamine/lysine-rich protein 1 OS=Homo sapiens OX=9606 GN=SREK1 PE=1 SV=1	56300	52296	76485	89000	95514	92837	70656	67637	47795	49030	63612	65114	58695	59201	88828	80983	60382	65357	81994	90211	59731	61590	56263	53051	50198	50795	89874	97175	82241	78601
Q8WXD5	Gem-associated protein 6	GEMIN6	sp|Q8WXD5|GEMI6_HUMAN Gem-associated protein 6 OS=Homo sapiens OX=9606 GN=GEMIN6 PE=1 SV=1	1	1	1	1	1	1	14234	14761	16776	15223	12024	12671	9991.4	10829	7802.9	9511.3	10117	1	1	1	1	1522.8	833.99	1	1	1	2343.9	1	1	1
Q8WXF1-2;Q8WXF1	Paraspeckle component 1	PSPC1	sp|Q8WXF1-2|PSPC1_HUMAN Isoform 2 of Paraspeckle component 1 OS=Homo sapiens OX=9606 GN=PSPC1;sp|Q8WXF1|PSPC1_HUMAN Paraspeckle component 1 OS=Homo sapiens OX=9606 GN=PSPC1 PE=1 SV=1	20653	19838	18133	20905	17204	18439	3652.4	3500.7	4116.8	2974.4	4955.7	3298.6	8894.4	10020	7446.2	8984.2	5096.7	7370.3	10450	11272	12585	11282	13908	11692	7818.7	9280	8040.3	7712.3	10305	10452
Q8WXG9;Q8WXG9-4;Q8WXG9-3	G-protein coupled receptor 98	GPR98	sp|Q8WXG9|AGRV1_HUMAN Adhesion G-protein coupled receptor V1 OS=Homo sapiens OX=9606 GN=ADGRV1 PE=1 SV=2	1	1	1	1	1	1	3557.2	3964.9	8352.9	8429.7	6396.1	1	5567.8	5123.2	2212.7	1	4826.8	6934.7	1	1	1	1	1	1	1	1	1	1	1	1
Q8WZ79-2;Q8WZ79	Deoxyribonuclease-2-beta	DNASE2B	sp|Q8WZ79-2|DNS2B_HUMAN Isoform 2 of Deoxyribonuclease-2-beta OS=Homo sapiens OX=9606 GN=DNASE2B;sp|Q8WZ79|DNS2B_HUMAN Deoxyribonuclease-2-beta OS=Homo sapiens OX=9606 GN=DNASE2B PE=2 SV=1	1	2905.3	1	1	7898.4	12335	31827	36404	24113	24686	32307	37403	29545	28964	34525	39566	44033	39718	23620	16751	52797	53049	21247	18397	45859	46811	30744	27349	57659	53380
Q92504	Zinc transporter SLC39A7	SLC39A7	sp|Q92504|S39A7_HUMAN Zinc transporter SLC39A7 OS=Homo sapiens OX=9606 GN=SLC39A7 PE=1 SV=2	26410	19684	22622	25206	22165	24568	69840	66428	39378	45837	50662	48314	35341	34499	30596	25468	43346	38958	21596	24271	20161	18514	22779	25730	25939	23744	33225	36012	29108	29022
Q92522	Histone H1x	H1FX	sp|Q92522|H1X_HUMAN Histone H1.10 OS=Homo sapiens OX=9606 GN=H1-10 PE=1 SV=1	79500	56532	86638	70661	74545	60127	64655	68614	37939	42930	29510	27079	44121	46829	83508	73519	52734	49453	84582	84044	77170	75367	64626	65447	52906	45111	71140	73962	64211	64190
Q92526;Q92526-3;Q92526-2	T-complex protein 1 subunit zeta-2	CCT6B	sp|Q92526|TCPW_HUMAN T-complex protein 1 subunit zeta-2 OS=Homo sapiens OX=9606 GN=CCT6B PE=1 SV=5;sp|Q92526-3|TCPW_HUMAN Isoform 3 of T-complex protein 1 subunit zeta-2 OS=Homo sapiens OX=9606 GN=CCT6B;sp|Q92526-2|TCPW_HUMAN Isoform 2 of T-complex protein	1	1	1	1	1	1	1	1	1	1	1	1	13309	1	1	1	1	1	11567	1	1	1	14491	14831	1	18691	1	1	1	1
Q92538-3;Q92538-2;Q92538	Golgi-specific brefeldin A-resistance guanine nucleotide exchange factor 1	GBF1	sp|Q92538-3|GBF1_HUMAN Isoform 3 of Golgi-specific brefeldin A-resistance guanine nucleotide exchange factor 1 OS=Homo sapiens OX=9606 GN=GBF1;sp|Q92538-2|GBF1_HUMAN Isoform 2 of Golgi-specific brefeldin A-resistance guanine nucleotide exchange factor 1 OS	1	1	1	1	1	1	2857.9	1588.3	14773	9922.4	4025.2	2738.3	1494.9	2318	370.95	1	1	1	1	1	1	1	1	1	1	1	1	1	1	1
Q92541	RNA polymerase-associated protein RTF1 homolog	RTF1	sp|Q92541|RTF1_HUMAN RNA polymerase-associated protein RTF1 homolog OS=Homo sapiens OX=9606 GN=RTF1 PE=1 SV=4	9094.8	8895.5	6245.4	13616	15145	16142	13107	12450	8479.4	6863.1	7030.4	8143.1	9448.6	9926.3	18447	19734	10063	8348.4	19219	16762	10870	11196	10075	10190	7552.9	7638.5	14990	15549	10755	11321
Q92598-2;Q92598-3;Q92598;Q92598-4;O95757	Heat shock protein 105 kDa	HSPH1	sp|Q92598-2|HS105_HUMAN Isoform Beta of Heat shock protein 105 kDa OS=Homo sapiens OX=9606 GN=HSPH1;sp|Q92598-3|HS105_HUMAN Isoform 3 of Heat shock protein 105 kDa OS=Homo sapiens OX=9606 GN=HSPH1;sp|Q92598|HS105_HUMAN Heat shock protein 105 kDa OS=Homo sa	19859	16378	1	7883.1	1	8015.2	12275	12840	21637	15448	19403	17385	20810	16281	14418	15943	10935	10589	13937	15024	21574	19129	17156	16940	19930	18650	9840.7	7535	11761	11218
Q92616	Translational activator GCN1	GCN1L1	sp|Q92616|GCN1_HUMAN eIF-2-alpha kinase activator GCN1 OS=Homo sapiens OX=9606 GN=GCN1 PE=1 SV=6	5506.2	1	1	1	1	1	16173	13471	18114	15975	8676.8	11618	12805	12602	9366.1	9793.2	9788.9	7567.2	5297.1	3220.5	2355.7	2078.7	2503.9	2131.9	1581.5	2979.2	1242.2	1	3624.4	1448.4
Q92621	Nuclear pore complex protein Nup205	NUP205	sp|Q92621|NU205_HUMAN Nuclear pore complex protein Nup205 OS=Homo sapiens OX=9606 GN=NUP205 PE=1 SV=3	1	1	1	1	1	1	27702	30039	52492	52406	29304	27654	23146	23112	18616	15949	15263	17802	3588.4	5847	6617.7	6717.4	2767.9	3783.6	1	1890.8	3919	2534.7	1	2721.8
Q92769-3;Q13547;Q92769	Histone deacetylase 2;Histone deacetylase 1	HDAC2;HDAC1	sp|Q92769-3|HDAC2_HUMAN Isoform 2 of Histone deacetylase 2 OS=Homo sapiens OX=9606 GN=HDAC2;sp|Q13547|HDAC1_HUMAN Histone deacetylase 1 OS=Homo sapiens OX=9606 GN=HDAC1 PE=1 SV=1;sp|Q92769|HDAC2_HUMAN Histone deacetylase 2 OS=Homo sapiens OX=9606 GN=HDAC2	20477	13683	4178.7	6645.9	3171	5656	6821.4	6494.5	9940	8874.4	9239.5	9714.6	13272	13467	10938	12863	6954.9	9852.3	13085	12590	13806	11047	13164	12898	15507	14589	9777.7	8426.2	11236	8653.4
Q92841-1;Q92841-3;Q92841;Q92841-2	Probable ATP-dependent RNA helicase DDX17	DDX17	sp|Q92841-1|DDX17_HUMAN Isoform 2 of Probable ATP-dependent RNA helicase DDX17 OS=Homo sapiens OX=9606 GN=DDX17;sp|Q92841-3|DDX17_HUMAN Isoform 4 of Probable ATP-dependent RNA helicase DDX17 OS=Homo sapiens OX=9606 GN=DDX17;sp|Q92841|DDX17_HUMAN Probable A	1353.1	750.75	1	1	1	1	692.26	1229.9	1159.1	660.33	3167.3	2921.6	2556.8	3162.9	3904.4	2421.5	4180.4	986.8	1	1	28588	26488	1769.1	1003.4	4936.6	3888.7	823.82	1	6643	6120.4
Q92945;Q96AE4;Q96AE4-2	Far upstream element-binding protein 2	KHSRP	sp|Q92945|FUBP2_HUMAN Far upstream element-binding protein 2 OS=Homo sapiens OX=9606 GN=KHSRP PE=1 SV=4	25712	22615	1554.3	10839	1570	5223.6	7056.4	6738.4	5809.8	5510.1	9021.9	9191.4	12535	10376	8763.5	10265	8222.7	7137.8	10085	7298.9	10610	9634.1	11859	13532	10556	10257	5860.7	1720.3	7352.8	6795.4
Q92947	Glutaryl-CoA dehydrogenase, mitochondrial	GCDH	sp|Q92947|GCDH_HUMAN Glutaryl-CoA dehydrogenase, mitochondrial OS=Homo sapiens OX=9606 GN=GCDH PE=1 SV=1	1	2554	1	1	1	1	5680.9	4467.7	11224	10405	9755.4	10996	8743.4	10084	9002.5	12725	7725.3	1	9502.4	5331.5	6935.8	7441.2	1	4983.4	5319.3	1	1	1	8552.8	7695.2
Q92973-2;Q92973;Q92973-3;O14787-2;O14787	Transportin-1	TNPO1	sp|Q92973-2|TNPO1_HUMAN Isoform 2 of Transportin-1 OS=Homo sapiens OX=9606 GN=TNPO1;sp|Q92973|TNPO1_HUMAN Transportin-1 OS=Homo sapiens OX=9606 GN=TNPO1 PE=1 SV=2;sp|Q92973-3|TNPO1_HUMAN Isoform 3 of Transportin-1 OS=Homo sapiens OX=9606 GN=TNPO1	1	1	1	1	1	1	56187	55928	177000	169590	54426	56660	26043	24991	10524	12351	14826	13969	2380.2	2454	2252	2567.5	2446.8	2490.2	2266.7	2540.9	569.07	1804.1	198.25	616.74
Q92979	Ribosomal RNA small subunit methyltransferase NEP1	EMG1	sp|Q92979|NEP1_HUMAN Ribosomal RNA small subunit methyltransferase NEP1 OS=Homo sapiens OX=9606 GN=EMG1 PE=1 SV=4	1	1	1	1	1	1	1	1	1	1	1	1	1	1	1	1	1	1	1	1	9130.3	7283	1	1	477.84	1	1	1	1	1
Q93050-1;Q93050;Q93050-3	V-type proton ATPase 116 kDa subunit a isoform 1	ATP6V0A1	sp|Q93050-1|VPP1_HUMAN Isoform 2 of V-type proton ATPase 116 kDa subunit a1 OS=Homo sapiens OX=9606 GN=ATP6V0A1;sp|Q93050|VPP1_HUMAN V-type proton ATPase 116 kDa subunit a1 OS=Homo sapiens OX=9606 GN=ATP6V0A1 PE=1 SV=3;sp|Q93050-3|VPP1_HUMAN Isoform 3 of V	1	1	1	1	1	1	53027	56773	58397	49378	89881	85210	38124	36992	26738	28736	34048	38197	631.25	4031.4	1796.9	1479.9	1925.4	1959.2	8270.6	8624.6	7069.5	5254.1	3398.3	3266
Q93077;Q7L7L0;P04908;Q71UI9-5	Histone H2A type 1-C;Histone H2A type 3;Histone H2A type 1-B/E	HIST1H2AC;HIST3H2A;HIST1H2AB	sp|Q93077|H2A1C_HUMAN Histone H2A type 1-C OS=Homo sapiens OX=9606 GN=H2AC6 PE=1 SV=3;sp|Q7L7L0|H2A3_HUMAN Histone H2A type 3 OS=Homo sapiens OX=9606 GN=H2AW PE=1 SV=3;sp|P04908|H2A1B_HUMAN Histone H2A type 1-B/E OS=Homo sapiens OX=9606 GN=H2AC4 PE=1 SV=2	1	1	1	3190	9415.8	10227	18964	17120	8031.8	7852.6	11905	11067	8871.7	10603	20362	20305	25770	24673	6224.8	9697.4	55742	52430	11498	8672.6	25687	25402	12286	10373	41460	41678
Q93100-3;Q93100	Phosphorylase b kinase regulatory subunit beta	PHKB	sp|Q93100-3|KPBB_HUMAN Isoform 3 of Phosphorylase b kinase regulatory subunit beta OS=Homo sapiens OX=9606 GN=PHKB;sp|Q93100|KPBB_HUMAN Phosphorylase b kinase regulatory subunit beta OS=Homo sapiens OX=9606 GN=PHKB PE=1 SV=3	149770	148820	162980	172030	132810	140530	109920	108480	83977	85914	105010	109470	95319	96328	112770	125190	127260	124640	122280	103720	96673	96721	113630	113380	92075	91818	115150	114180	126920	121350
Q96A72;P61326;P61326-2	Protein mago nashi homolog 2;Protein mago nashi homolog	MAGOHB;MAGOH	sp|Q96A72|MGN2_HUMAN Protein mago nashi homolog 2 OS=Homo sapiens OX=9606 GN=MAGOHB PE=1 SV=1;sp|P61326|MGN_HUMAN Protein mago nashi homolog OS=Homo sapiens OX=9606 GN=MAGOH PE=1 SV=1	4172.9	1	1	1	1	1	1	1	1	1	1	1	1	674.19	1	444.14	1	1	1	1	7429	6992.4	1	1	3296.9	6161.7	1	1	1861.4	1603.5
Q96AG4	Leucine-rich repeat-containing protein 59	LRRC59	sp|Q96AG4|LRC59_HUMAN Leucine-rich repeat-containing protein 59 OS=Homo sapiens OX=9606 GN=LRRC59 PE=1 SV=1	15140	6707.7	1	1	1	1	1	1	2833.9	2564	3012.3	3696.3	1255.6	2605.5	2922.2	2395.2	1811.6	1242.4	4035.4	4509.8	2532.6	2392.3	4526.3	4581.4	7538	4550	1	1	2618.1	2637.5
Q96AV8;Q96AV8-3;Q96AV8-2	Transcription factor E2F7	E2F7	sp|Q96AV8|E2F7_HUMAN Transcription factor E2F7 OS=Homo sapiens OX=9606 GN=E2F7 PE=1 SV=3;sp|Q96AV8-3|E2F7_HUMAN Isoform 3 of Transcription factor E2F7 OS=Homo sapiens OX=9606 GN=E2F7;sp|Q96AV8-2|E2F7_HUMAN Isoform 2 of Transcription factor E2F7 OS=Homo sap	4090.7	2304.9	1	1341.7	539.02	712.8	3513.6	2475	2425.9	1469.8	5343.4	4053.9	11509	9455.1	15280	9605.9	7288.6	9062.1	5875.8	9148.7	10766	12388	9391.1	11009	6337.1	7637.8	10417	10244	16078	18824
Q96BQ5	Coiled-coil domain-containing protein 127	CCDC127	sp|Q96BQ5|CC127_HUMAN Coiled-coil domain-containing protein 127 OS=Homo sapiens OX=9606 GN=CCDC127 PE=1 SV=1	1	1	1	1	1	1	1	3727.1	4507.3	3747.3	5071	5427.6	4056.9	6096.9	3384.2	3148.5	7175.9	5049.2	1	1	1	2105.8	538	1	3206.5	2681.8	1	3750	1	3509.8
Q96C57	Uncharacterized protein C12orf43	C12orf43	sp|Q96C57|CSTOS_HUMAN Protein CUSTOS OS=Homo sapiens OX=9606 GN=CUSTOS PE=1 SV=2	1	1	2563.3	1	1	1	10257	6602.8	7378.9	6400.5	5165.2	1776.4	4951.9	5528.9	13346	10411	6203.5	4152.5	18512	19787	12423	14503	8213.2	9002.6	12274	18386	18299	18303	15888	15255
Q96CN7	Isochorismatase domain-containing protein 1	ISOC1	sp|Q96CN7|ISOC1_HUMAN Isochorismatase domain-containing protein 1 OS=Homo sapiens OX=9606 GN=ISOC1 PE=1 SV=3	1	1	1	1	1	1	29026	21161	31027	28149	34723	33098	13877	11287	8244.5	9971.6	16936	20917	13828	11768	31151	28123	15780	10366	9000	9565.5	1	1	6378.5	7524.6
Q96CT7	Coiled-coil domain-containing protein 124	CCDC124	sp|Q96CT7|CC124_HUMAN Coiled-coil domain-containing protein 124 OS=Homo sapiens OX=9606 GN=CCDC124 PE=1 SV=1	32897	25891	30993	35264	53689	47279	39530	38305	34849	35802	19056	16267	30498	30975	39991	33625	29435	33085	37245	39911	37448	36000	30859	29047	45833	46838	61293	59497	42113	38736
Q96DI7;Q96DI7-2	U5 small nuclear ribonucleoprotein 40 kDa protein	SNRNP40	sp|Q96DI7|SNR40_HUMAN U5 small nuclear ribonucleoprotein 40 kDa protein OS=Homo sapiens OX=9606 GN=SNRNP40 PE=1 SV=1;sp|Q96DI7-2|SNR40_HUMAN Isoform 2 of U5 small nuclear ribonucleoprotein 40 kDa protein OS=Homo sapiens OX=9606 GN=SNRNP40	1	6955.6	7015.1	8956	1	5148.9	6704.6	6724.1	4106.9	2821.9	8653.1	7688.2	8729.8	6752.7	10424	11014	6337.8	8148.1	9434.3	9977.2	14662	15936	9478.2	7380.3	9683.1	6991	8519.9	7165.7	9827.2	10255
Q96ER3	Protein SAAL1	SAAL1	sp|Q96ER3|SAAL1_HUMAN Protein SAAL1 OS=Homo sapiens OX=9606 GN=SAAL1 PE=1 SV=2	1	1	1	1	1	1	15903	17840	139630	138950	23687	17678	19817	8091.3	197.73	376.31	1414	2208.9	1	1	1	581.86	1	1	1	1	1	1	367.47	306.37
Q96EU6-2;Q96EU6	Ribosomal RNA processing protein 36 homolog	RRP36	sp|Q96EU6-2|RRP36_HUMAN Isoform 2 of Ribosomal RNA processing protein 36 homolog OS=Homo sapiens OX=9606 GN=RRP36;sp|Q96EU6|RRP36_HUMAN Ribosomal RNA processing protein 36 homolog OS=Homo sapiens OX=9606 GN=RRP36 PE=1 SV=1	1485.9	2343.6	1	2461.6	4801.2	2721	6245.5	5303.8	1925.9	1953.8	1	3857.8	1	1255.8	2120.2	1	1	1	1	2893	3548.5	4749.8	1857.5	1871.9	1	2736.9	3025.4	4642.9	4001.3	3058.1
Q96EX3	WD repeat-containing protein 34	WDR34	sp|Q96EX3|WDR34_HUMAN WD repeat-containing protein 34 OS=Homo sapiens OX=9606 GN=WDR34 PE=1 SV=2	7078.3	4895.1	1	4159.6	1	4016.2	1	1	5071	4662.4	4926.5	5195.5	5237.9	4591.5	6652	5679.9	4359.7	4480	8586.4	7743.4	4866.6	5512	1	5445.7	4215.9	4928.1	6536.1	6715.7	6575.8	5858.1
Q96EY4	Translation machinery-associated protein 16	TMA16	sp|Q96EY4|TMA16_HUMAN Translation machinery-associated protein 16 OS=Homo sapiens OX=9606 GN=TMA16 PE=1 SV=2	125520	124660	174670	185440	182680	175480	142510	138880	106550	104020	84144	77441	65647	66161	141570	132310	111260	126410	122110	151910	125320	120160	106650	102580	115430	118670	179990	194560	138110	136320
Q96GA3	Protein LTV1 homolog	LTV1	sp|Q96GA3|LTV1_HUMAN Protein LTV1 homolog OS=Homo sapiens OX=9606 GN=LTV1 PE=1 SV=1	11423	9965.7	18828	11279	23597	24273	18704	18106	11303	11017	12898	12615	13970	14309	15818	16827	13534	1	25166	20089	15169	16174	13102	15377	14536	17155	20699	18448	13672	17391
Q96GC5-3;Q96GC5	39S ribosomal protein L48, mitochondrial	MRPL48	sp|Q96GC5-3|RM48_HUMAN Isoform 2 of 39S ribosomal protein L48, mitochondrial OS=Homo sapiens OX=9606 GN=MRPL48;sp|Q96GC5|RM48_HUMAN 39S ribosomal protein L48, mitochondrial OS=Homo sapiens OX=9606 GN=MRPL48 PE=1 SV=2	4474.5	4666.1	3315.6	4263.5	1	1434.8	1	4401.8	1	3529	3480.4	4056.9	4043.9	4188	1	3825.9	2738.3	1	1	8079.8	5280	5283	3065.8	3657.2	3563.1	3734.9	1	6919.5	3141.8	4236.9
Q96GD4-3;Q96GD4-4;Q96GD4-2;Q96GD4;Q96GD4-5	Aurora kinase B	AURKB	sp|Q96GD4-3|AURKB_HUMAN Isoform 3 of Aurora kinase B OS=Homo sapiens OX=9606 GN=AURKB;sp|Q96GD4-4|AURKB_HUMAN Isoform 4 of Aurora kinase B OS=Homo sapiens OX=9606 GN=AURKB;sp|Q96GD4-2|AURKB_HUMAN Isoform 2 of Aurora kinase B OS=Homo sapiens OX=9606 GN=AURK	1	1	1	1	1	1	1	1	1	1	1	1	1	1	1	1	1	1	1	1	4412.5	3933.3	1	1	1	1	1	1	1	1
Q96H79;Q96H79-2	Zinc finger CCCH-type antiviral protein 1-like	ZC3HAV1L	sp|Q96H79|ZCCHL_HUMAN Zinc finger CCCH-type antiviral protein 1-like OS=Homo sapiens OX=9606 GN=ZC3HAV1L PE=1 SV=2;sp|Q96H79-2|ZCCHL_HUMAN Isoform 2 of Zinc finger CCCH-type antiviral protein 1-like OS=Homo sapiens OX=9606 GN=ZC3HAV1L	3774.5	1315.3	1	1	1450.4	1	1	1	1	1	1	850.8	927.24	1	1	1	1	1	1	1	955.29	2176.8	981.91	1	1	1	1	1	1	1
Q96HS1;Q96HS1-2	Serine/threonine-protein phosphatase PGAM5, mitochondrial	PGAM5	sp|Q96HS1|PGAM5_HUMAN Serine/threonine-protein phosphatase PGAM5, mitochondrial OS=Homo sapiens OX=9606 GN=PGAM5 PE=1 SV=2;sp|Q96HS1-2|PGAM5_HUMAN Isoform 2 of Serine/threonine-protein phosphatase PGAM5, mitochondrial OS=Homo sapiens OX=9606 GN=PGAM5	20240	20836	12689	20180	16035	18231	13557	13622	11477	11288	11153	12150	11720	10051	10931	10200	15398	13782	27699	26013	22137	22905	22211	22678	13877	13658	12339	12532	17043	17124
Q96I25	Splicing factor 45	RBM17	sp|Q96I25|SPF45_HUMAN Splicing factor 45 OS=Homo sapiens OX=9606 GN=RBM17 PE=1 SV=1	54816	54812	79077	87084	85918	84269	53073	55662	34058	33281	45860	47320	46960	47165	70772	68591	56755	50055	77542	76392	50953	51861	51025	50255	43658	42300	63783	63228	63515	60214
Q96IX5	Up-regulated during skeletal muscle growth protein 5	USMG5	sp|Q96IX5|ATPMD_HUMAN ATP synthase membrane subunit DAPIT, mitochondrial OS=Homo sapiens OX=9606 GN=ATP5MD PE=1 SV=1	1	1	1	1	1	1	13492	14954	16352	16347	10445	12819	8226.1	6930.7	5651	4823.1	6676.2	8879.5	1	5841.6	6936.4	5455.1	7457.1	6315.8	4788.8	4317	3794.5	1	1	2224
Q96IZ7-2;Q96IZ7	Serine/Arginine-related protein 53	RSRC1	sp|Q96IZ7-2|RSRC1_HUMAN Isoform 2 of Serine/Arginine-related protein 53 OS=Homo sapiens OX=9606 GN=RSRC1;sp|Q96IZ7|RSRC1_HUMAN Serine/Arginine-related protein 53 OS=Homo sapiens OX=9606 GN=RSRC1 PE=1 SV=1	32978	34452	48779	48750	51161	43632	36325	31503	26705	27479	30482	30313	30940	32359	43570	38560	32564	34724	36606	42001	34282	32791	32862	32419	28632	29609	41778	50062	39235	37469
Q96J01;Q96J01-2	THO complex subunit 3	THOC3	sp|Q96J01|THOC3_HUMAN THO complex subunit 3 OS=Homo sapiens OX=9606 GN=THOC3 PE=1 SV=1;sp|Q96J01-2|THOC3_HUMAN Isoform 2 of THO complex subunit 3 OS=Homo sapiens OX=9606 GN=THOC3	18747	16732	25495	29156	29907	26391	24529	24261	21099	19700	19022	18410	17142	18138	19989	19375	17527	17408	19697	24722	18429	19036	15868	17718	17990	17371	25285	22380	20451	19607
Q96JH8;Q96JH8-1;Q96JH8-2;Q96JH8-3	Ras-associating and dilute domain-containing protein	RADIL	sp|Q96JH8|RADIL_HUMAN Ras-associating and dilute domain-containing protein OS=Homo sapiens OX=9606 GN=RADIL PE=1 SV=5;sp|Q96JH8-1|RADIL_HUMAN Isoform 1 of Ras-associating and dilute domain-containing protein OS=Homo sapiens OX=9606 GN=RADIL	1	1	1	1	1	1	265450	273360	333010	322570	257260	239550	219620	217980	171740	151960	225240	238120	1452700	1453900	1203800	1221300	1625500	1669100	46005	21715	21353	20298	7205.4	5636.1
Q96P70	Importin-9	IPO9	sp|Q96P70|IPO9_HUMAN Importin-9 OS=Homo sapiens OX=9606 GN=IPO9 PE=1 SV=3	1	1	1	1	1	1	763650	742980	1122200	1171500	638470	628270	392990	387510	200140	195740	305490	301240	24537	22908	15055	14976	14429	15253	27241	28028	64104	64122	14377	12075
Q96Q07;Q96Q07-2;Q96Q07-3	BTB/POZ domain-containing protein 9	BTBD9	sp|Q96Q07|BTBD9_HUMAN BTB/POZ domain-containing protein 9 OS=Homo sapiens OX=9606 GN=BTBD9 PE=1 SV=2;sp|Q96Q07-2|BTBD9_HUMAN Isoform 2 of BTB/POZ domain-containing protein 9 OS=Homo sapiens OX=9606 GN=BTBD9;sp|Q96Q07-3|BTBD9_HUMAN Isoform 3 of BTB/POZ doma	912.41	1	1	1	1	1739.4	96578	78320	124530	94532	142760	154060	51301	51276	44578	54038	60910	77831	18560	16628	8389.1	8634.5	10314	9175.4	25016	22738	29439	30476	12799	12437
Q96QV6;P16104	Histone H2A type 1-A;Histone H2AX	HIST1H2AA;H2AFX	sp|Q96QV6|H2A1A_HUMAN Histone H2A type 1-A OS=Homo sapiens OX=9606 GN=H2AC1 PE=1 SV=3;sp|P16104|H2AX_HUMAN Histone H2AX OS=Homo sapiens OX=9606 GN=H2AX PE=1 SV=2	1	1	1	1	1	1	1	1	1	1	1	1	1	1	1	1	1	1	1	1	40984	48921	1	1	11479	12504	1	1	17980	18092
Q96TA2-3;Q96TA2-2;Q96TA2	ATP-dependent zinc metalloprotease YME1L1	YME1L1	sp|Q96TA2-3|YMEL1_HUMAN Isoform 3 of ATP-dependent zinc metalloprotease YME1L1 OS=Homo sapiens OX=9606 GN=YME1L1;sp|Q96TA2-2|YMEL1_HUMAN Isoform 2 of ATP-dependent zinc metalloprotease YME1L1 OS=Homo sapiens OX=9606 GN=YME1L1;sp|Q96TA2|YMEL1_HUMAN ATP-depe	1	1	1	1	1	1	1	1	1	1	1	1	1	1	1	1	1	1	4009.9	1	1	4218.2	1	2998.2	1	1	1	1	1	1
Q99417	C-Myc-binding protein	MYCBP	sp|Q99417|MYCBP_HUMAN c-Myc-binding protein OS=Homo sapiens OX=9606 GN=MYCBP PE=1 SV=3	166490	152150	195440	211770	203500	183070	41246	40154	30135	27715	45003	43021	47985	46666	46662	43541	53999	47077	90868	96262	87810	85051	102920	109750	93670	93076	80768	81578	114770	115740
Q99439-2;Q99439	Calponin-2	CNN2	sp|Q99439-2|CNN2_HUMAN Isoform 2 of Calponin-2 OS=Homo sapiens OX=9606 GN=CNN2;sp|Q99439|CNN2_HUMAN Calponin-2 OS=Homo sapiens OX=9606 GN=CNN2 PE=1 SV=4	1219.5	1	1	1	1	1	1	1	1	1	1830.1	1	1	1600.6	1	1	1	1	1	1	1749.8	626.19	1	1	1	1	1	1	1	1
Q99460-2;Q99460	26S proteasome non-ATPase regulatory subunit 1	PSMD1	sp|Q99460-2|PSMD1_HUMAN Isoform 2 of 26S proteasome non-ATPase regulatory subunit 1 OS=Homo sapiens OX=9606 GN=PSMD1;sp|Q99460|PSMD1_HUMAN 26S proteasome non-ATPase regulatory subunit 1 OS=Homo sapiens OX=9606 GN=PSMD1 PE=1 SV=2	1	1	1	1	1	1	1	1	4272.6	3058.3	4058.2	3457.2	1	3116.3	1	1	1	2321.1	1	1	2379	1	2676.3	4103.5	3945.9	3747.9	1	1	1	1
Q99497	Protein deglycase DJ-1	PARK7	sp|Q99497|PARK7_HUMAN Parkinson disease protein 7 OS=Homo sapiens OX=9606 GN=PARK7 PE=1 SV=2	7190	2836.2	1	1	1	1	1	1	1	1	1	1	1	1793.9	1	1	1	1	1	1626.6	1821.9	1	1968.1	1	1903.8	1	1	1	1	1
Q99623;Q99623-2	Prohibitin-2	PHB2	sp|Q99623|PHB2_HUMAN Prohibitin-2 OS=Homo sapiens OX=9606 GN=PHB2 PE=1 SV=2;sp|Q99623-2|PHB2_HUMAN Isoform 2 of Prohibitin-2 OS=Homo sapiens OX=9606 GN=PHB2	18469	17836	7345.2	8047.3	1777.5	1984.9	26788	30884	27500	26151	27244	28336	24562	24136	17834	18711	21443	20717	17194	14518	16374	15979	18793	18812	19172	20894	13715	12244	11848	14360
Q99714-2;Q99714	3-hydroxyacyl-CoA dehydrogenase type-2	HSD17B10	sp|Q99714-2|HCD2_HUMAN Isoform 2 of 3-hydroxyacyl-CoA dehydrogenase type-2 OS=Homo sapiens OX=9606 GN=HSD17B10;sp|Q99714|HCD2_HUMAN 3-hydroxyacyl-CoA dehydrogenase type-2 OS=Homo sapiens OX=9606 GN=HSD17B10 PE=1 SV=3	1	1	1	1	1	1	1	1	1	1	1	238.1	2447.7	1	2430.5	1	1	1740	1	1	2376.5	1	1	1	1	1	1	1	1	1
Q99729-3;Q99729-2;Q99729-4;Q99729	Heterogeneous nuclear ribonucleoprotein A/B	HNRNPAB	sp|Q99729-3|ROAA_HUMAN Isoform 3 of Heterogeneous nuclear ribonucleoprotein A/B OS=Homo sapiens OX=9606 GN=HNRNPAB;sp|Q99729-2|ROAA_HUMAN Isoform 2 of Heterogeneous nuclear ribonucleoprotein A/B OS=Homo sapiens OX=9606 GN=HNRNPAB;sp|Q99729-4|ROAA_HUMAN Iso	3212.5	1	1	1	1	1	1	1005.1	1	1	832.91	1	1030.8	1410	1325.4	1	1072.3	1132.7	1	1	20967	29029	1136.4	824.5	6295.7	4948	1	1	5093.6	6383.4
Q99755-2;Q99755-4;Q99755-3;Q99755	Phosphatidylinositol 4-phosphate 5-kinase type-1 alpha	PIP5K1A	sp|Q99755-2|PI51A_HUMAN Isoform 2 of Phosphatidylinositol 4-phosphate 5-kinase type-1 alpha OS=Homo sapiens OX=9606 GN=PIP5K1A;sp|Q99755-4|PI51A_HUMAN Isoform 4 of Phosphatidylinositol 4-phosphate 5-kinase type-1 alpha OS=Homo sapiens OX=9606 GN=PIP5K1A;sp	1	1706	1	1	1	1	2136.4	1	5380.3	5632.4	5060	4490.5	5272.1	5746.3	4656.2	6909	4579.6	1	1	2758.2	4320.6	3407.6	2895.5	4053.1	7009.5	4431.1	3197.9	2380.1	2348.1	4958.3
Q99832-3;Q99832;Q99832-4;Q99832-2	T-complex protein 1 subunit eta	CCT7	sp|Q99832-3|TCPH_HUMAN Isoform 3 of T-complex protein 1 subunit eta OS=Homo sapiens OX=9606 GN=CCT7;sp|Q99832|TCPH_HUMAN T-complex protein 1 subunit eta OS=Homo sapiens OX=9606 GN=CCT7 PE=1 SV=2;sp|Q99832-4|TCPH_HUMAN Isoform 4 of T-complex protein 1 subun	12336	15459	1	1918.4	1	1	7344	8655	8454.1	10220	10968	11121	12121	12628	7731.3	9760.3	8406.3	9268.8	8079.4	5445.2	8291	8204.5	11536	11907	14553	12243	3730.6	2287	3050.3	3595.2
Q99873-2;Q99873-3;Q99873;Q99873-5	Protein arginine N-methyltransferase 1	PRMT1	sp|Q99873-2|ANM1_HUMAN Isoform 2 of Protein arginine N-methyltransferase 1 OS=Homo sapiens OX=9606 GN=PRMT1;sp|Q99873-3|ANM1_HUMAN Isoform 3 of Protein arginine N-methyltransferase 1 OS=Homo sapiens OX=9606 GN=PRMT1;sp|Q99873|ANM1_HUMAN Protein arginine N-	14435	16307	5472.4	5894.8	1	1	2525	1	3718.6	6705.1	7011.3	6218.4	8254.7	5989.8	5413.6	4835	1	4351.7	4214.9	6465	6627.3	8064.5	8340.8	8987.4	9848.4	8950.7	4236.1	4994.3	3670.6	5273.4
Q99878;Q96KK5;Q9BTM1;Q16777;Q6FI13;P20671;P0C0S8;Q9BTM1-2	Histone H2A type 1-J;Histone H2A type 1-H;Histone H2A.J;Histone H2A type 2-C;Histone H2A type 2-A;Histone H2A type 1-D;Histone H2A type 1	HIST1H2AJ;HIST1H2AH;H2AFJ;HIST2H2AC;HIST2H2AA3;HIST1H2AD;HIST1H2AG	sp|Q99878|H2A1J_HUMAN Histone H2A type 1-J OS=Homo sapiens OX=9606 GN=H2AC14 PE=1 SV=3;sp|Q96KK5|H2A1H_HUMAN Histone H2A type 1-H OS=Homo sapiens OX=9606 GN=H2AC12 PE=1 SV=3;sp|Q9BTM1|H2AJ_HUMAN Histone H2A.J OS=Homo sapiens OX=9606 GN=H2AJ PE=1 SV=1;sp|Q1	122900	121000	308030	291110	509430	535240	704000	711050	341770	346800	481970	497690	425510	414610	891360	891800	1040700	1049100	454030	444090	2488500	2404200	533110	389700	1040800	1031400	535050	504150	1793700	1764600
Q99880;Q99879;Q99877;Q93079;Q5QNW6;P62807;P58876;O60814;Q5QNW6-2;P57053;Q96A08;A0A2R8Y619	Histone H2B type 1-L;Histone H2B type 1-M;Histone H2B type 1-N;Histone H2B type 1-H;Histone H2B type 2-F;Histone H2B type 1-C/E/F/G/I;Histone H2B type 1-D;Histone H2B type 1-K;Histone H2B type F-S;Histone H2B type 1-A	HIST1H2BL;HIST1H2BM;HIST1H2BN;HIST1H2BH;HIST2H2BF;HIST1H2BC;HIST1H2BD;HIST1H2BK;H2BFS;HIST1H2BA	sp|Q99880|H2B1L_HUMAN Histone H2B type 1-L OS=Homo sapiens OX=9606 GN=H2BC13 PE=1 SV=3;sp|Q99879|H2B1M_HUMAN Histone H2B type 1-M OS=Homo sapiens OX=9606 GN=H2BC14 PE=1 SV=3;sp|Q99877|H2B1N_HUMAN Histone H2B type 1-N OS=Homo sapiens OX=9606 GN=H2BC15 PE=1	12421	12913	21472	23143	45990	41400	50469	56033	23538	26254	36677	40427	37148	34923	66876	62611	81920	77477	39671	40758	188510	191650	43073	34720	95627	91695	47000	45588	144570	139330
Q9BPZ2;Q99865	Spindlin-2B;Spindlin-2A	SPIN2B;SPIN2A	sp|Q9BPZ2|SPI2B_HUMAN Spindlin-2B OS=Homo sapiens OX=9606 GN=SPIN2B PE=1 SV=1;sp|Q99865|SPI2A_HUMAN Spindlin-2A OS=Homo sapiens OX=9606 GN=SPIN2A PE=1 SV=3	20268	23406	26536	23196	24402	26984	12729	9554.1	11372	9540.9	6887.9	11374	12314	12437	16509	18359	15354	17783	18301	22191	22284	19939	21770	22466	25314	25763	25778	27998	36832	40191
Q9BQA1;Q9BQA1-2	Methylosome protein 50	WDR77	sp|Q9BQA1|MEP50_HUMAN Methylosome protein 50 OS=Homo sapiens OX=9606 GN=WDR77 PE=1 SV=1;sp|Q9BQA1-2|MEP50_HUMAN Isoform 2 of Methylosome protein 50 OS=Homo sapiens OX=9606 GN=WDR77	1428500	1244600	1465900	1432500	1238000	1250800	436900	431820	303550	315580	346720	365040	399010	397250	518230	525170	535250	549410	944930	933230	853000	849830	983760	941660	805190	803300	930970	920920	1096100	1056900
Q9BQE3	Tubulin alpha-1C chain	TUBA1C	sp|Q9BQE3|TBA1C_HUMAN Tubulin alpha-1C chain OS=Homo sapiens OX=9606 GN=TUBA1C PE=1 SV=1	13534	11762	13344	8219.8	1	1	22758	12381	37663	32030	31095	30212	31637	35484	22398	24976	20766	26506	25103	23669	27168	23101	33559	27503	21171	20689	22266	26659	14922	12834
Q9BRK5-2;Q9BRK5-6;Q9BRK5	45 kDa calcium-binding protein	SDF4	sp|Q9BRK5-2|CAB45_HUMAN Isoform 2 of 45 kDa calcium-binding protein OS=Homo sapiens OX=9606 GN=SDF4;sp|Q9BRK5-6|CAB45_HUMAN Isoform 6 of 45 kDa calcium-binding protein OS=Homo sapiens OX=9606 GN=SDF4;sp|Q9BRK5|CAB45_HUMAN 45 kDa calcium-binding protein OS=	1	1	1	1	1	1	6877.6	1	13368	11872	11547	10779	10207	8768.5	8926.7	4822.6	7996.9	6918.6	1	8710.2	10507	8811.3	9601.8	6164.4	4993.9	4357.6	3565.3	3744.5	1	4001.6
Q9BRR8	G patch domain-containing protein 1	GPATCH1	sp|Q9BRR8|GPTC1_HUMAN G patch domain-containing protein 1 OS=Homo sapiens OX=9606 GN=GPATCH1 PE=1 SV=1	45572	42772	57827	63268	67113	65095	42161	38698	31125	31615	18328	17410	36770	40518	47030	42153	35467	37091	33709	42918	36395	36741	35632	34311	40154	40623	52649	54059	53429	50291
Q9BRS2	Serine/threonine-protein kinase RIO1	RIOK1	sp|Q9BRS2|RIOK1_HUMAN Serine/threonine-protein kinase RIO1 OS=Homo sapiens OX=9606 GN=RIOK1 PE=1 SV=2	340950	326030	413780	449790	442990	433140	249270	243910	173840	172500	189690	191270	198090	197070	282340	266040	242380	236820	343300	351160	275360	277620	276730	279840	248030	244950	325480	338610	322590	313690
Q9BRX2	Protein pelota homolog	PELO	sp|Q9BRX2|PELO_HUMAN Protein pelota homolog OS=Homo sapiens OX=9606 GN=PELO PE=1 SV=2	1	1	1	1	1	1	1	1	1	1	3195.7	2903.8	3380.2	5236.8	1	1	1	1	1	1	1	1	2977.4	2534.1	2983.4	1	1	1	1	1
Q9BT81-2;Q96BK5-2;Q96BK5	PIN2/TERF1-interacting telomerase inhibitor 1	PINX1	sp|Q9BT81-2|SOX7_HUMAN Isoform 2 of Transcription factor SOX-7 OS=Homo sapiens OX=9606 GN=SOX7;sp|Q96BK5-2|PINX1_HUMAN Isoform 2 of PIN2/TERF1-interacting telomerase inhibitor 1 OS=Homo sapiens OX=9606 GN=PINX1;sp|Q96BK5|PINX1_HUMAN PIN2/TERF1-interacting	11498	16278	12561	21785	20153	22986	23915	26256	14945	12890	14859	14001	9948.1	12617	20687	20271	9566	10048	26051	26464	16898	19066	10885	11009	17051	13924	25105	26462	15251	17320
Q9BU76-4;Q9BU76;Q9BU76-3;Q9BU76-2	Multiple myeloma tumor-associated protein 2	MMTAG2	sp|Q9BU76-4|MMTA2_HUMAN Isoform 4 of Multiple myeloma tumor-associated protein 2 OS=Homo sapiens OX=9606 GN=MMTAG2;sp|Q9BU76|MMTA2_HUMAN Multiple myeloma tumor-associated protein 2 OS=Homo sapiens OX=9606 GN=MMTAG2 PE=1 SV=1;sp|Q9BU76-3|MMTA2_HUMAN Isoform	820260	746320	946130	969060	977170	981100	759230	749080	617130	635710	625240	653000	675660	689950	754620	771460	810590	808110	803520	754740	602860	610970	749330	761160	706370	683860	868200	879050	815450	776650
Q9BUA3	Uncharacterized protein C11orf84	C11orf84	sp|Q9BUA3|SPNDC_HUMAN Spindlin interactor and repressor of chromatin-binding protein OS=Homo sapiens OX=9606 GN=SPINDOC PE=1 SV=3	37896	34506	39489	44737	47940	40068	18474	22189	14821	12951	22564	21632	27172	28112	32643	27396	30528	24554	39723	42470	39972	39134	40977	42359	37703	38965	45346	44325	68008	74197
Q9BUF5	Tubulin beta-6 chain	TUBB6	sp|Q9BUF5|TBB6_HUMAN Tubulin beta-6 chain OS=Homo sapiens OX=9606 GN=TUBB6 PE=1 SV=1	1756.6	989	1	1	1	1	43726	40557	44129	44869	36521	35877	36198	37554	37974	43250	36193	36286	33081	33575	29399	29264	24963	24358	16321	15515	21109	22281	21801	20692
Q9BUJ2-3;Q9BUJ2-4;Q9BUJ2-2;Q9BUJ2	Heterogeneous nuclear ribonucleoprotein U-like protein 1	HNRNPUL1	sp|Q9BUJ2-3|HNRL1_HUMAN Isoform 3 of Heterogeneous nuclear ribonucleoprotein U-like protein 1 OS=Homo sapiens OX=9606 GN=HNRNPUL1;sp|Q9BUJ2-4|HNRL1_HUMAN Isoform 4 of Heterogeneous nuclear ribonucleoprotein U-like protein 1 OS=Homo sapiens OX=9606 GN=HNRNP	1	1	1	1287.5	1	1	1	1	1842.2	1433.6	2338.4	1607.2	3722	3008.3	2502.6	1	1	1	1	2408	3365.1	5722.1	803	1	1	1	1	1	1	2204
Q9BUP0	EF-hand domain-containing protein D1	EFHD1	sp|Q9BUP0|EFHD1_HUMAN EF-hand domain-containing protein D1 OS=Homo sapiens OX=9606 GN=EFHD1 PE=1 SV=1	19365	20129	18948	20579	18119	17428	21536	20390	15570	1	22326	22427	22214	21753	21398	20748	21894	19829	23707	1	20025	20746	21863	21941	20718	20985	20441	19630	20237	20075
Q9BUQ8	Probable ATP-dependent RNA helicase DDX23	DDX23	sp|Q9BUQ8|DDX23_HUMAN Probable ATP-dependent RNA helicase DDX23 OS=Homo sapiens OX=9606 GN=DDX23 PE=1 SV=3	3530.5	2761.7	1	4017.4	1	6718.1	1	1828.2	1666	1	2292	2514.1	1662.1	3405.5	6505.8	4798.6	1	1	5224.2	6226.5	7919	6847.8	3313.7	2976.5	3090.5	2593.8	2582.3	2266	3934.9	2793.2
Q9BVA1	Tubulin beta-2B chain	TUBB2B	sp|Q9BVA1|TBB2B_HUMAN Tubulin beta-2B chain OS=Homo sapiens OX=9606 GN=TUBB2B PE=1 SV=1	1	1	1	1	1	1	7575.7	6069.6	6428.1	6459.7	5315.8	5265.9	6560.1	8420.7	7523.5	9153.7	6287.5	6207.2	6045.6	4870.1	4352	5459.6	4513.8	2985.9	1	2315.8	1	1	1	1
Q9BVP2-2;Q9BVP2	Guanine nucleotide-binding protein-like 3	GNL3	sp|Q9BVP2-2|GNL3_HUMAN Isoform 2 of Guanine nucleotide-binding protein-like 3 OS=Homo sapiens OX=9606 GN=GNL3;sp|Q9BVP2|GNL3_HUMAN Guanine nucleotide-binding protein-like 3 OS=Homo sapiens OX=9606 GN=GNL3 PE=1 SV=2	43917	36012	42384	60028	49382	50401	30255	36279	26822	23317	16167	17314	35021	34610	51792	59889	32325	33090	64569	55411	55457	52908	46237	41791	37557	34686	52990	56577	45267	45902
Q9BWH2	FUN14 domain-containing protein 2	FUNDC2	sp|Q9BWH2|FUND2_HUMAN FUN14 domain-containing protein 2 OS=Homo sapiens OX=9606 GN=FUNDC2 PE=1 SV=2	1	1	1	1	1	1	39041	38108	45798	45787	40146	40147	40052	38371	35173	28002	70607	65157	1	9596.2	3848.9	4951.5	7229.5	7738.2	20249	21556	29387	30861	12784	10246
Q9BWJ5	Splicing factor 3B subunit 5	SF3B5	sp|Q9BWJ5|SF3B5_HUMAN Splicing factor 3B subunit 5 OS=Homo sapiens OX=9606 GN=SF3B5 PE=1 SV=1	6583.6	7067.4	1	1970.4	3640.5	2806.8	1	1305.9	1343.7	1	2458.4	2799.9	2192.4	1	3239.6	1	2719.1	1	1	2167.7	3716.3	8605.7	1	3654	2489.6	2464	1	1311.5	3409.7	4251.6
Q9BXJ4-2;Q9BXJ4;Q9BXJ4-3	Complement C1q tumor necrosis factor-related protein 3	C1QTNF3	sp|Q9BXJ4-2|C1QT3_HUMAN Isoform 2 of Complement C1q tumor necrosis factor-related protein 3 OS=Homo sapiens OX=9606 GN=C1QTNF3;sp|Q9BXJ4|C1QT3_HUMAN Complement C1q tumor necrosis factor-related protein 3 OS=Homo sapiens OX=9606 GN=C1QTNF3 PE=1 SV=1;sp|Q9BX	1	1	1	1	1	1	1	6822.9	22388	20433	30914	30201	5255.5	1	1	1	1427.4	1	1	1600.8	5514.1	4543.3	1	1	845.99	2998.9	1	1	1	1
Q9BXP5-5;Q9BXP5-4;Q9BXP5-2;Q9BXP5-3;Q9BXP5	Serrate RNA effector molecule homolog	SRRT	sp|Q9BXP5-5|SRRT_HUMAN Isoform 5 of Serrate RNA effector molecule homolog OS=Homo sapiens OX=9606 GN=SRRT;sp|Q9BXP5-4|SRRT_HUMAN Isoform 4 of Serrate RNA effector molecule homolog OS=Homo sapiens OX=9606 GN=SRRT;sp|Q9BXP5-2|SRRT_HUMAN Isoform 2 of Serrate	3617.2	1	1	4478.4	4928.3	7002.3	4318.9	6296.4	3258	5295	2165.5	3269.7	4860.8	6928.5	11409	14292	7661.1	6701	9856.4	9715.3	11515	10479	6375	6218	9096.9	9131.6	11722	11630	8062.8	8405.2
Q9BXU1-3;Q9BXU1-2;Q9BXU1	Serine/threonine-protein kinase 31	STK31	sp|Q9BXU1-3|STK31_HUMAN Isoform 3 of Serine/threonine-protein kinase 31 OS=Homo sapiens OX=9606 GN=STK31;sp|Q9BXU1-2|STK31_HUMAN Isoform 2 of Serine/threonine-protein kinase 31 OS=Homo sapiens OX=9606 GN=STK31;sp|Q9BXU1|STK31_HUMAN Serine/threonine-protein	1	1	1	8825	8095.1	12510	13102	13425	13894	11358	16190	18874	15691	18873	24282	29423	29845	1	33351	28390	26904	26581	1	30486	35580	30539	48023	53725	54915	49342
Q9BXW9;Q9BXW9-1;Q9BXW9-3;Q9BXW9-4	Fanconi anemia group D2 protein	FANCD2	sp|Q9BXW9|FACD2_HUMAN Fanconi anemia group D2 protein OS=Homo sapiens OX=9606 GN=FANCD2 PE=1 SV=2;sp|Q9BXW9-1|FACD2_HUMAN Isoform 1 of Fanconi anemia group D2 protein OS=Homo sapiens OX=9606 GN=FANCD2;sp|Q9BXW9-3|FACD2_HUMAN Isoform 3 of Fanconi anemia gro	1	1	1	1	1	1	5041.3	7178.4	18664	13766	5762.2	4920.6	2020.2	2982.8	1	1	1	1	1	1	1	1	1	1	1	1	1	1	1	1
Q9BY41;Q9BY41-8;Q9BY41-7;Q9BY41-5;Q9BY41-4	Histone deacetylase 8	HDAC8	sp|Q9BY41|HDAC8_HUMAN Histone deacetylase 8 OS=Homo sapiens OX=9606 GN=HDAC8 PE=1 SV=2;sp|Q9BY41-8|HDAC8_HUMAN Isoform 8 of Histone deacetylase 8 OS=Homo sapiens OX=9606 GN=HDAC8;sp|Q9BY41-7|HDAC8_HUMAN Isoform 7 of Histone deacetylase 8 OS=Homo sapiens OX	3008	2587.9	1	1	1	1	1	1	1	1	1919	1	2068.3	1	2006.9	3140.5	1	2794.9	1	2386.2	2343.7	1	2763.9	2062.8	2236.9	1	1	1	2665.2	1923.5
Q9BY77-2;Q9BY77	Polymerase delta-interacting protein 3	POLDIP3	sp|Q9BY77-2|PDIP3_HUMAN Isoform 2 of Polymerase delta-interacting protein 3 OS=Homo sapiens OX=9606 GN=POLDIP3;sp|Q9BY77|PDIP3_HUMAN Polymerase delta-interacting protein 3 OS=Homo sapiens OX=9606 GN=POLDIP3 PE=1 SV=2	10918	9840.2	9028.1	12039	10857	11453	8208.1	7983.9	6731.5	5548.6	6748.8	6485.4	9543.4	9441.3	10942	10716	7704.9	10495	13116	11738	8093.8	9144.1	8067.1	8431.6	9970.9	9757.6	15097	15467	13486	11768
Q9BYI3-3;Q9BYI3	Hyccin	FAM126A	sp|Q9BYI3-3|HYCCI_HUMAN Isoform 3 of Hyccin OS=Homo sapiens OX=9606 GN=FAM126A;sp|Q9BYI3|HYCCI_HUMAN Hyccin OS=Homo sapiens OX=9606 GN=FAM126A PE=1 SV=2	1	1	1	1	1	1	1	1	1	1	1	1	1	1	1	1	1	1	1	1	1	1	1	1	1	1	1	1	1	1
Q9BYJ1;Q9BYJ1-2	Hydroperoxide isomerase ALOXE3	ALOXE3	sp|Q9BYJ1|LOXE3_HUMAN Hydroperoxide isomerase ALOXE3 OS=Homo sapiens OX=9606 GN=ALOXE3 PE=1 SV=1;sp|Q9BYJ1-2|LOXE3_HUMAN Isoform 2 of Hydroperoxide isomerase ALOXE3 OS=Homo sapiens OX=9606 GN=ALOXE3	1	1	1	1	1	1	1	851.55	18143	16605	10317	10854	7663.6	6551.2	891.09	1	1619.9	5915.7	1	1	1	1	1	1	1	1	1	1	1	1
Q9BZE1	39S ribosomal protein L37, mitochondrial	MRPL37	sp|Q9BZE1|RM37_HUMAN 39S ribosomal protein L37, mitochondrial OS=Homo sapiens OX=9606 GN=MRPL37 PE=1 SV=2	8907.4	1	1	1	1	1	1	1	1	1	1	1	1987.5	2182.7	1	1	1	1	1	1	2116.4	1	1935.9	4063.2	1802.6	1276.8	1	1	1	1
Q9BZE4-3;Q9BZE4-2;Q9BZE4	Nucleolar GTP-binding protein 1	GTPBP4	sp|Q9BZE4-3|NOG1_HUMAN Isoform 3 of Nucleolar GTP-binding protein 1 OS=Homo sapiens OX=9606 GN=GTPBP4;sp|Q9BZE4-2|NOG1_HUMAN Isoform 2 of Nucleolar GTP-binding protein 1 OS=Homo sapiens OX=9606 GN=GTPBP4;sp|Q9BZE4|NOG1_HUMAN Nucleolar GTP-binding protein 1	1	1	1	1	1	1	1	1	1	1	1	1	1	1	1	1	1	1	1	1	8098.8	5631.2	1	1	1	1	1	1	1	1
Q9BZF1-3;Q9BZF1-2;Q9BZF1	Oxysterol-binding protein-related protein 8	OSBPL8	sp|Q9BZF1-3|OSBL8_HUMAN Isoform 3 of Oxysterol-binding protein-related protein 8 OS=Homo sapiens OX=9606 GN=OSBPL8;sp|Q9BZF1-2|OSBL8_HUMAN Isoform 2 of Oxysterol-binding protein-related protein 8 OS=Homo sapiens OX=9606 GN=OSBPL8;sp|Q9BZF1|OSBL8_HUMAN Oxys	1	1	1	1	1	1	1	1	5140.2	3598.8	4950	3266.7	1	3342.5	1	1	1	1	1	1	1	1	1	1	1	1	1	1	1	1
Q9BZI7-2;Q9BZI7	Regulator of nonsense transcripts 3B	UPF3B	sp|Q9BZI7-2|REN3B_HUMAN Isoform 2 of Regulator of nonsense transcripts 3B OS=Homo sapiens OX=9606 GN=UPF3B;sp|Q9BZI7|REN3B_HUMAN Regulator of nonsense transcripts 3B OS=Homo sapiens OX=9606 GN=UPF3B PE=1 SV=1	8756.7	6610.5	5364	7257.9	7733.3	9574.4	8635	8450.7	4856.8	4806.7	4130.1	3936.8	4498.4	4866.4	10725	10977	7966.2	6068.6	7380.5	8666.2	6826.3	7722.3	5445.2	4831	7180	7939.8	13534	14207	9340.1	9222.8
Q9C086	INO80 complex subunit B	INO80B	sp|Q9C086|IN80B_HUMAN INO80 complex subunit B OS=Homo sapiens OX=9606 GN=INO80B PE=1 SV=2	27537	26548	33359	38302	36123	33200	34518	32563	23675	21913	21171	19886	25373	25107	33513	39493	20642	24275	40895	35667	27210	27013	26815	26594	29825	29493	36832	38284	30433	30950
Q9C0B5-2;Q9C0B5	Palmitoyltransferase ZDHHC5	ZDHHC5	sp|Q9C0B5-2|ZDHC5_HUMAN Isoform 2 of Palmitoyltransferase ZDHHC5 OS=Homo sapiens OX=9606 GN=ZDHHC5;sp|Q9C0B5|ZDHC5_HUMAN Palmitoyltransferase ZDHHC5 OS=Homo sapiens OX=9606 GN=ZDHHC5 PE=1 SV=2	1	1	1	1	1	1	1	1	3664.4	1	1	1	6355.3	4719.4	1	2741.1	1	1	1	1	1	1	1	1	1	1	1	1	1	1
Q9C0E2	Exportin-4	XPO4	sp|Q9C0E2|XPO4_HUMAN Exportin-4 OS=Homo sapiens OX=9606 GN=XPO4 PE=1 SV=2	1	1	1	1	1	1	5842.5	8930.4	20097	16737	5782.1	5049.1	1342.3	2509.7	1	1	1	1	1	1	1	1	1	1	1	1	1	1	1	1
Q9GZP4-2;Q9GZP4	PITH domain-containing protein 1	PITHD1	sp|Q9GZP4-2|PITH1_HUMAN Isoform 2 of PITH domain-containing protein 1 OS=Homo sapiens OX=9606 GN=PITHD1;sp|Q9GZP4|PITH1_HUMAN PITH domain-containing protein 1 OS=Homo sapiens OX=9606 GN=PITHD1 PE=1 SV=1	7273.4	8089.6	1	1	1	1	1	1	1	1	3123.3	1	5395.9	3790.4	1	1	1	1	1	1	1	1	3441.6	4260.4	1	2522.9	1	1	1	1
Q9GZR7;Q9GZR7-2	ATP-dependent RNA helicase DDX24	DDX24	sp|Q9GZR7|DDX24_HUMAN ATP-dependent RNA helicase DDX24 OS=Homo sapiens OX=9606 GN=DDX24 PE=1 SV=1;sp|Q9GZR7-2|DDX24_HUMAN Isoform 2 of ATP-dependent RNA helicase DDX24 OS=Homo sapiens OX=9606 GN=DDX24	1	1	1	1	1	1	5925.6	1	7035.6	8607.5	6514.1	8472.9	8285.2	9081.4	6517.3	7917.9	10517	6966.4	5764.9	1	6315.3	5061	4903.3	2892.6	9912.1	7731.3	7228.7	4527.2	6978.6	5917.8
Q9H078-5;Q9H078-3;Q9H078-4;Q9H078-2;Q9H078	Caseinolytic peptidase B protein homolog	CLPB	sp|Q9H078-5|CLPB_HUMAN Isoform 5 of Caseinolytic peptidase B protein homolog OS=Homo sapiens OX=9606 GN=CLPB;sp|Q9H078-3|CLPB_HUMAN Isoform 3 of Caseinolytic peptidase B protein homolog OS=Homo sapiens OX=9606 GN=CLPB;sp|Q9H078-4|CLPB_HUMAN Isoform 4 of Ca	1	1	1	1	1	1	1	1	9066.2	11949	9305.8	7176	9694	10408	5099.3	1	5346.4	1	1	5073.7	4716.4	3100.3	4755.1	3948.9	1	1	1	1	1	1
Q9H089	Large subunit GTPase 1 homolog	LSG1	sp|Q9H089|LSG1_HUMAN Large subunit GTPase 1 homolog OS=Homo sapiens OX=9606 GN=LSG1 PE=1 SV=2	9499.6	3320	1	1	1	1	1	1	1	1	1	1	1	1	1430.2	1	1	1	1	1416.5	1	1	1	1	1	1	1	1	1	1
Q9H0A0;Q9H0A0-2	N-acetyltransferase 10	NAT10	sp|Q9H0A0|NAT10_HUMAN RNA cytidine acetyltransferase OS=Homo sapiens OX=9606 GN=NAT10 PE=1 SV=2;sp|Q9H0A0-2|NAT10_HUMAN Isoform 2 of RNA cytidine acetyltransferase OS=Homo sapiens OX=9606 GN=NAT10	1	1	1	1	1	1	4758.9	3493.9	1772.5	2264.7	2199.2	2603	4274	4421.2	5790.1	3661.9	3351.7	2038.3	2596.1	3625.1	10780	11171	2670.2	3824.5	1722.8	4457.9	3481.4	4143.2	4982.3	5651.1
Q9H0G5	Nuclear speckle splicing regulatory protein 1	NSRP1	sp|Q9H0G5|NSRP1_HUMAN Nuclear speckle splicing regulatory protein 1 OS=Homo sapiens OX=9606 GN=NSRP1 PE=1 SV=1	14735	16440	22478	27779	28180	29516	22887	21537	13747	14369	16165	16002	14872	13886	20137	21042	16428	12634	26287	24834	18131	18159	15760	16171	15601	15671	26451	27428	23330	22243
Q9H0S4-2;Q9H0S4	Probable ATP-dependent RNA helicase DDX47	DDX47	sp|Q9H0S4-2|DDX47_HUMAN Isoform 2 of Probable ATP-dependent RNA helicase DDX47 OS=Homo sapiens OX=9606 GN=DDX47;sp|Q9H0S4|DDX47_HUMAN Probable ATP-dependent RNA helicase DDX47 OS=Homo sapiens OX=9606 GN=DDX47 PE=1 SV=1	1	1	1	1	1	1	1	2097.1	1	1	1155.2	1	1	1200.2	2345.9	3191.9	1063.8	1	8330.1	3040.1	8167.9	6930.2	1390.6	1	1	1	2623.7	2543.9	2748	1
Q9H0U9	Testis-specific Y-encoded-like protein 1	TSPYL1	sp|Q9H0U9|TSYL1_HUMAN Testis-specific Y-encoded-like protein 1 OS=Homo sapiens OX=9606 GN=TSPYL1 PE=1 SV=3	1	1	1	1	1	1	8632.9	9316.5	10215	7110.5	6912.2	5710.7	12059	12336	7090.2	6718.6	10233	11162	1	6415.3	9314.2	7473.5	5100.4	1	11079	10049	10578	8807.5	8375.3	8079.7
Q9H0W5	Coiled-coil domain-containing protein 8	CCDC8	sp|Q9H0W5|CCDC8_HUMAN Coiled-coil domain-containing protein 8 OS=Homo sapiens OX=9606 GN=CCDC8 PE=1 SV=2	2156.5	1222.6	1	1	1	1	2547.6	2426.9	1	1	3003	1330.9	2292.5	2136.5	3328.1	1858	1	1615.3	2412.2	1	1779.1	2663.4	1817.4	2251.4	2147	1103.9	2654.4	1	3482.3	1
Q9H1E3-2;Q9H1E3	Nuclear ubiquitous casein and cyclin-dependent kinase substrate 1	NUCKS1	sp|Q9H1E3-2|NUCKS_HUMAN Isoform 2 of Nuclear ubiquitous casein and cyclin-dependent kinase substrate 1 OS=Homo sapiens OX=9606 GN=NUCKS1;sp|Q9H1E3|NUCKS_HUMAN Nuclear ubiquitous casein and cyclin-dependent kinase substrate 1 OS=Homo sapiens OX=9606 GN=NUCK	4090.2	4755.3	1	10432	1	4217.7	6051.1	6883	4328	1480	3384.4	3794.1	1998.6	1	6875.6	6293.6	6225.2	5124.9	7551.7	5918.3	5365.8	4684.5	1	1	1	1	9171.8	8892.4	5639.6	6599.7
Q9H2H8;Q9H2H8-2	Peptidyl-prolyl cis-trans isomerase-like 3	PPIL3	sp|Q9H2H8|PPIL3_HUMAN Peptidyl-prolyl cis-trans isomerase-like 3 OS=Homo sapiens OX=9606 GN=PPIL3 PE=1 SV=1;sp|Q9H2H8-2|PPIL3_HUMAN Isoform 2 of Peptidyl-prolyl cis-trans isomerase-like 3 OS=Homo sapiens OX=9606 GN=PPIL3	15081	13033	1	20281	20063	18845	14269	13258	10397	6288.2	4188	4730.1	4541.1	3941.6	12058	13139	6640.6	5668	13543	11456	11654	7939	5134.3	5860.8	5677.4	6064.5	12196	16388	10377	14382
Q9H2W6	39S ribosomal protein L46, mitochondrial	MRPL46	sp|Q9H2W6|RM46_HUMAN 39S ribosomal protein L46, mitochondrial OS=Homo sapiens OX=9606 GN=MRPL46 PE=1 SV=1	8513.7	8171	8019.3	9301.4	8611.2	9888.5	5172.6	8657.9	5345.2	4609.7	5092.8	5599.1	5688.6	6042.8	8451.3	10417	6132.4	5291.1	12783	8959.4	7104.4	7602.2	5423.6	5311	7241.8	6222	10071	11037	8263.8	8724.1
Q9H307	Pinin	PNN	sp|Q9H307|PININ_HUMAN Pinin OS=Homo sapiens OX=9606 GN=PNN PE=1 SV=5	1	1	1	1	1	1	1	1	2828	1	1	1	3474	3843.2	4537.2	1	4039.2	1	1	1	19915	14372	1	1	3030.2	4150.7	1	1	9201.3	6116.4
Q9H3J6;Q9H3J6-2	Probable peptide chain release factor C12orf65, mitochondrial	C12orf65	sp|Q9H3J6|CL065_HUMAN Probable peptide chain release factor C12orf65, mitochondrial OS=Homo sapiens OX=9606 GN=C12orf65 PE=2 SV=1;sp|Q9H3J6-2|CL065_HUMAN Isoform 2 of Probable peptide chain release factor C12orf65, mitochondrial OS=Homo sapiens OX=9606 GN=	5806.5	7675.9	1	6556.2	1	2131.1	6930.9	7173	5475.7	6580.8	5458.5	4667	8410.5	8254.3	15082	10433	10775	8137.6	5021.5	11011	6415.3	7386.6	6932.6	7092.1	9427.1	8709	10274	11215	8674.5	10008
Q9H3K6;Q9H3K6-2	BolA-like protein 2	BOLA2	sp|Q9H3K6|BOLA2_HUMAN BolA-like protein 2 OS=Homo sapiens OX=9606 GN=BOLA2 PE=1 SV=1;sp|Q9H3K6-2|BOLA2_HUMAN Isoform 2 of BolA-like protein 2 OS=Homo sapiens OX=9606 GN=BOLA2	488310	486330	589490	609320	572840	548320	424530	420970	351240	353480	365420	379070	375690	373770	371860	366480	474820	455110	421220	425660	341090	362940	492650	517240	449780	436470	455110	460840	499840	476620
Q9H501	ESF1 homolog	ESF1	sp|Q9H501|ESF1_HUMAN ESF1 homolog OS=Homo sapiens OX=9606 GN=ESF1 PE=1 SV=1	4114	1	1	9608	1	11028	5868.4	5874.1	1627.1	1	1	1	4162.6	2990.5	7548.9	9080	5159.5	4989.5	10784	8506.9	5434.3	5648.5	1	5713.9	1	1	5470.8	6325.9	5524.5	5983.4
Q9H583	HEAT repeat-containing protein 1;HEAT repeat-containing protein 1, N-terminally processed	HEATR1	sp|Q9H583|HEAT1_HUMAN HEAT repeat-containing protein 1 OS=Homo sapiens OX=9606 GN=HEATR1 PE=1 SV=3	1	1	1	1	1	1	9175.7	12141	23188	18198	13224	11525	10624	8295	5699.8	9072	3101.3	4206.6	1	1	2970.8	2298.5	1	1	1	432.45	1	1	1	1
Q9H5V9-2;Q9H5V9-3;Q9H5V9	UPF0428 protein CXorf56	CXorf56	sp|Q9H5V9-2|CX056_HUMAN Isoform 2 of UPF0428 protein CXorf56 OS=Homo sapiens OX=9606 GN=CXorf56;sp|Q9H5V9-3|CX056_HUMAN Isoform 3 of UPF0428 protein CXorf56 OS=Homo sapiens OX=9606 GN=CXorf56;sp|Q9H5V9|CX056_HUMAN UPF0428 protein CXorf56 OS=Homo sapiens OX	9056.1	10179	11558	12622	15455	18314	13346	10767	9844.8	11838	8417.7	9300.8	11815	13203	18598	23118	12921	15135	19922	18425	13483	12877	13115	11738	13894	14587	18983	20514	16447	16735
Q9H5Z1;Q9H5Z1-2	Probable ATP-dependent RNA helicase DHX35	DHX35	sp|Q9H5Z1|DHX35_HUMAN Probable ATP-dependent RNA helicase DHX35 OS=Homo sapiens OX=9606 GN=DHX35 PE=1 SV=2;sp|Q9H5Z1-2|DHX35_HUMAN Isoform 2 of Probable ATP-dependent RNA helicase DHX35 OS=Homo sapiens OX=9606 GN=DHX35	63500	55624	65191	71519	64962	69143	42644	42383	39987	36759	22285	20619	40131	42276	48040	56350	36036	41682	60602	53674	48533	46961	42742	40856	45254	43822	58390	60564	55683	53669
Q9H773	dCTP pyrophosphatase 1	DCTPP1	sp|Q9H773|DCTP1_HUMAN dCTP pyrophosphatase 1 OS=Homo sapiens OX=9606 GN=DCTPP1 PE=1 SV=1	21660	21057	11802	13583	1	1	1	1	1	4782.4	11291	10725	10546	8343.2	1	1	10520	1	9149.4	7569.2	6368.6	7545.3	11849	12774	12814	10448	1	1	8423.6	7565.9
Q9H7B2	Ribosome production factor 2 homolog	RPF2	sp|Q9H7B2|RPF2_HUMAN Ribosome production factor 2 homolog OS=Homo sapiens OX=9606 GN=RPF2 PE=1 SV=2	1	1	1	1	1	1	1	1	1	1	1	1	1	1	1	1	1	1	1	1	5950.7	4888.6	1	1	1	1	1	1	1	1
Q9H7C9;Q9H7C9-3;Q9H7C9-2	Mth938 domain-containing protein	AAMDC	sp|Q9H7C9|AAMDC_HUMAN Mth938 domain-containing protein OS=Homo sapiens OX=9606 GN=AAMDC PE=1 SV=1	33595	31596	41839	44995	37838	36564	29287	29504	16618	17950	22875	22873	28278	26990	35023	36848	21249	21171	26340	24178	24845	26168	17944	17124	11120	12569	20917	23017	26660	25256
Q9H7Z3	Protein NRDE2 homolog	NRDE2	sp|Q9H7Z3|NRDE2_HUMAN Nuclear exosome regulator NRDE2 OS=Homo sapiens OX=9606 GN=NRDE2 PE=1 SV=3	45851	35109	50763	56170	52242	60149	49053	52171	33458	30297	27850	27630	28295	27321	51752	58173	33641	36986	63282	63534	45210	47126	38086	37722	34518	30480	60620	60086	49793	48118
Q9H840	Gem-associated protein 7	GEMIN7	sp|Q9H840|GEMI7_HUMAN Gem-associated protein 7 OS=Homo sapiens OX=9606 GN=GEMIN7 PE=1 SV=1	1	1	1	1	1	1	6701.2	1	15809	11710	1	10861	7879.2	7074	5569.6	7816.9	1	1	1	1	1	1	1	1	1	1	1	1	1	1
Q9H857-3;Q9H857-2;Q9H857;Q9H857-4	5-nucleotidase domain-containing protein 2	NT5DC2	sp|Q9H857-3|NT5D2_HUMAN Isoform 3 of 5-nucleotidase domain-containing protein 2 OS=Homo sapiens OX=9606 GN=NT5DC2;sp|Q9H857-2|NT5D2_HUMAN Isoform 2 of 5-nucleotidase domain-containing protein 2 OS=Homo sapiens OX=9606 GN=NT5DC2;sp|Q9H857|NT5D2_HUMAN 5-n	13758	9046.2	1	4306.1	1	1571	1924.3	4959	4673.9	6295	4427.4	7910.1	6489.2	8120.5	5888.2	3805.7	6534.4	7518	3275.8	7393.6	8223.3	7418.7	8206.7	6524.7	6829.1	6119.9	1	4708.1	5776	7815
Q9H875;Q9H875-2	PRKR-interacting protein 1	PRKRIP1	sp|Q9H875|PKRI1_HUMAN PRKR-interacting protein 1 OS=Homo sapiens OX=9606 GN=PRKRIP1 PE=1 SV=1;sp|Q9H875-2|PKRI1_HUMAN Isoform 2 of PRKR-interacting protein 1 OS=Homo sapiens OX=9606 GN=PRKRIP1	1	6102.4	6606.7	9920.3	10669	12453	11835	14999	7678	7249.4	6949.6	6076.5	8182.7	7153	18705	13741	11544	8165.1	13022	15834	12425	12558	8084.5	6738.8	9672.3	10021	18489	20917	14167	14259
Q9H8G2	Caspase activity and apoptosis inhibitor 1	CAAP1	sp|Q9H8G2|CAAP1_HUMAN Caspase activity and apoptosis inhibitor 1 OS=Homo sapiens OX=9606 GN=CAAP1 PE=1 SV=2	1	1	1	1	1	1	1	1	1	1	1	1	1	1	1427.4	1	1	1	1	1370.3	1	1	1	1	1	1	1	1	1	1
Q9H8M2;Q9H8M2-3;Q9H8M2-1;Q9H8M2-6;Q9H8M2-2;Q9H8M2-4	Bromodomain-containing protein 9	BRD9	sp|Q9H8M2|BRD9_HUMAN Bromodomain-containing protein 9 OS=Homo sapiens OX=9606 GN=BRD9 PE=1 SV=2;sp|Q9H8M2-3|BRD9_HUMAN Isoform 3 of Bromodomain-containing protein 9 OS=Homo sapiens OX=9606 GN=BRD9;sp|Q9H8M2-1|BRD9_HUMAN Isoform 5 of Bromodomain-containing	27713	30311	34342	42298	41521	42673	42436	46500	37972	37363	37225	39482	42907	39702	45853	46007	43526	39018	43369	46555	33052	36310	35255	36460	41245	41474	50758	52108	41893	40030
Q9H936	Mitochondrial glutamate carrier 1	SLC25A22	sp|Q9H936|GHC1_HUMAN Mitochondrial glutamate carrier 1 OS=Homo sapiens OX=9606 GN=SLC25A22 PE=1 SV=1	1	1	1	1	1	1	1	1615.9	5512.4	3403.7	2044	1	3424.5	3177.8	631.52	483.8	1	1	2926.7	3915.2	3540.4	2694.3	2937.1	3275.4	1	1	1	1	1	1
Q9HAV4	Exportin-5	XPO5	sp|Q9HAV4|XPO5_HUMAN Exportin-5 OS=Homo sapiens OX=9606 GN=XPO5 PE=1 SV=1	1	1	1	1	1	1	5734.9	6823.7	13922	14149	12515	10397	10466	12055	5634.8	7628.3	6703.2	6040.4	1	4247.9	5145.6	4283.6	6518.8	5389.2	5639.7	6134.1	1	1	1	1
Q9HB71-2;Q9HB71	Calcyclin-binding protein	CACYBP	sp|Q9HB71-2|CYBP_HUMAN Isoform 2 of Calcyclin-binding protein OS=Homo sapiens OX=9606 GN=CACYBP;sp|Q9HB71|CYBP_HUMAN Calcyclin-binding protein OS=Homo sapiens OX=9606 GN=CACYBP PE=1 SV=2	16584	13237	1	6126.5	1884.4	1	4756.2	4608.4	7513.5	6336.8	11082	8292.6	9832.3	8502.5	8100.9	9924.2	5955.2	8052.2	9276	7270.7	6989.6	5709.2	13102	12182	13551	13722	5039.4	5725.2	5950.4	5223.4
Q9HCG8	Pre-mRNA-splicing factor CWC22 homolog	CWC22	sp|Q9HCG8|CWC22_HUMAN Pre-mRNA-splicing factor CWC22 homolog OS=Homo sapiens OX=9606 GN=CWC22 PE=1 SV=3	13118	8850.4	14602	15215	12940	17679	12442	11227	6834.4	5709.5	7158.2	7217	8524.3	8557.4	21764	18218	13969	11690	20607	16177	11153	11076	13837	13786	5575.3	4774.6	15075	12820	11441	15549
Q9HCH5-6;Q9HCH5;Q9HCH5-13;Q9HCH5-15;Q9HCH5-12;Q9HCH5-14;Q9HCH5-11;Q9HCH5-7;Q9HCH5-8	Synaptotagmin-like protein 2	SYTL2	sp|Q9HCH5-6|SYTL2_HUMAN Isoform 4 of Synaptotagmin-like protein 2 OS=Homo sapiens OX=9606 GN=SYTL2;sp|Q9HCH5|SYTL2_HUMAN Synaptotagmin-like protein 2 OS=Homo sapiens OX=9606 GN=SYTL2 PE=1 SV=3;sp|Q9HCH5-13|SYTL2_HUMAN Isoform 10 of Synaptotagmin-like prote	1	1	1	1	1	1	27559	27180	31675	28309	21162	19988	16739	19362	13023	17591	20379	23823	1	1	1	1	1	1	1	1	1	1	1	1
Q9HCN8	Stromal cell-derived factor 2-like protein 1	SDF2L1	sp|Q9HCN8|SDF2L_HUMAN Stromal cell-derived factor 2-like protein 1 OS=Homo sapiens OX=9606 GN=SDF2L1 PE=1 SV=2	2714.6	1	1	1	1	1	1783.4	2714.1	2871	1	2656.7	2173.8	2198.9	3560	2680	2356.5	1	1	1	1	3064.7	1	1047.9	1	1	1	1	1	1	1
Q9NNW5	WD repeat-containing protein 6	WDR6	sp|Q9NNW5|WDR6_HUMAN WD repeat-containing protein 6 OS=Homo sapiens OX=9606 GN=WDR6 PE=1 SV=1	1	1	1	1	1	1	27058	28662	38057	37774	35521	30710	32833	35523	22177	23677	27812	30375	17779	16245	18819	18512	18183	16734	29343	29600	21694	22349	19126	20776
Q9NP64-2;Q9NP64-3;Q9NP64	Nucleolar protein of 40 kDa	ZCCHC17	sp|Q9NP64-2|NO40_HUMAN Isoform 2 of Nucleolar protein of 40 kDa OS=Homo sapiens OX=9606 GN=ZCCHC17;sp|Q9NP64-3|NO40_HUMAN Isoform 3 of Nucleolar protein of 40 kDa OS=Homo sapiens OX=9606 GN=ZCCHC17;sp|Q9NP64|NO40_HUMAN Nucleolar protein of 40 kDa OS=Homo s	609070	620190	754620	739340	716690	641780	531020	531480	441610	446360	457810	475100	453600	436600	486240	428490	565910	558160	471190	507120	425040	434750	493190	504350	487500	489220	638490	650050	639180	599570
Q9NP73-4;Q9NP73-3;Q9NP73	Putative bifunctional UDP-N-acetylglucosamine transferase and deubiquitinase ALG13	ALG13	sp|Q9NP73-4|ALG13_HUMAN Isoform 4 of Putative bifunctional UDP-N-acetylglucosamine transferase and deubiquitinase ALG13 OS=Homo sapiens OX=9606 GN=ALG13;sp|Q9NP73-3|ALG13_HUMAN Isoform 3 of Putative bifunctional UDP-N-acetylglucosamine transferase and deub	3379.5	4289.9	1	4215	1	1	1	1645.2	1	1	1	1	1	2906.5	1	1	1756.8	1	1	3371.2	2917.9	2923.2	2977.6	2226.5	2678.6	2561.4	1	1	3615.9	4154.4
Q9NP97;Q8TF09;Q9NP97-2	Dynein light chain roadblock-type 1	DYNLRB1	sp|Q9NP97|DLRB1_HUMAN Dynein light chain roadblock-type 1 OS=Homo sapiens OX=9606 GN=DYNLRB1 PE=1 SV=3	30524	30335	36181	37409	35902	35057	28090	25905	27956	27256	30889	30141	32433	32954	38619	45237	29816	35062	42419	38195	31001	29007	28803	31372	28749	29004	33802	39618	36209	35292
Q9NPI7	Lysine-rich coiled-coil protein 1	KRCC1	sp|Q9NPI7|KRCC1_HUMAN Lysine-rich coiled-coil protein 1 OS=Homo sapiens OX=9606 GN=KRCC1 PE=1 SV=1	5334.6	1	1	4955.7	1	1	2859.1	1	1	3484.7	1	2897.8	3104.4	1	1	9805.6	1	1	6804	2638.1	3748.5	1	1	1	4124.4	1	1	1176	1	5901.1
Q9NQ29;Q9NQ29-2;Q9NQ29-3	Putative RNA-binding protein Luc7-like 1	LUC7L	sp|Q9NQ29|LUC7L_HUMAN Putative RNA-binding protein Luc7-like 1 OS=Homo sapiens OX=9606 GN=LUC7L PE=1 SV=1;sp|Q9NQ29-2|LUC7L_HUMAN Isoform 2 of Putative RNA-binding protein Luc7-like 1 OS=Homo sapiens OX=9606 GN=LUC7L;sp|Q9NQ29-3|LUC7L_HUMAN Isoform 3 of Pu	417440	446420	656240	634640	621830	651290	533140	582180	380010	383230	399160	405660	397640	406300	554450	506670	637280	582970	597530	658120	449590	467580	441290	468590	478420	447490	755410	771850	678090	639190
Q9NR30;Q9NR30-2;Q9BQ39	Nucleolar RNA helicase 2	DDX21	sp|Q9NR30|DDX21_HUMAN Nucleolar RNA helicase 2 OS=Homo sapiens OX=9606 GN=DDX21 PE=1 SV=5;sp|Q9NR30-2|DDX21_HUMAN Isoform 2 of Nucleolar RNA helicase 2 OS=Homo sapiens OX=9606 GN=DDX21	1	1	1	1	1	1332.6	4915.3	6013.7	1882.6	3276.8	3213.3	4552.9	6292.2	6493.1	8805.8	10030	8971.4	8817.5	4505.4	4672.5	71285	65686	4950.9	4774.1	8856	8137.5	2249.7	2019	13554	16569
Q9NR50;Q9NR50-3;Q9NR50-2	Translation initiation factor eIF-2B subunit gamma	EIF2B3	sp|Q9NR50|EI2BG_HUMAN Translation initiation factor eIF-2B subunit gamma OS=Homo sapiens OX=9606 GN=EIF2B3 PE=1 SV=1;sp|Q9NR50-3|EI2BG_HUMAN Isoform 3 of Translation initiation factor eIF-2B subunit gamma OS=Homo sapiens OX=9606 GN=EIF2B3;sp|Q9NR50-2|EI2BG	1	1	1	1	1	1	39343	34674	67130	62055	32508	34421	22273	20363	5896.6	7118.6	9108.8	8316	1	1	1	1	1	1	1	1	1	1	1	1
Q9NS69	Mitochondrial import receptor subunit TOM22 homolog	TOMM22	sp|Q9NS69|TOM22_HUMAN Mitochondrial import receptor subunit TOM22 homolog OS=Homo sapiens OX=9606 GN=TOMM22 PE=1 SV=3	1	1	1	1	1	1	1	1	7730.5	7795.5	6256.3	1	2813.5	4336.4	2636.4	1	1	1	1	3809.1	2719.1	4976.7	1	1	1	1	1	1	1	1
Q9NSI2-2;Q9NSI2	Protein FAM207A	FAM207A	sp|Q9NSI2-2|F207A_HUMAN Isoform B of Protein FAM207A OS=Homo sapiens OX=9606 GN=FAM207A;sp|Q9NSI2|F207A_HUMAN Protein FAM207A OS=Homo sapiens OX=9606 GN=FAM207A PE=1 SV=2	9638.5	6999.1	10340	10748	10998	12557	9418.1	9048.3	6824.1	5721	7376.5	6666.8	8519.4	9662.8	12076	15946	8384.4	8230.6	12773	13284	14036	11875	9774.3	8221.9	9964.3	11603	16112	16166	10602	11231
Q9NTJ3-2;Q9NTJ3	Structural maintenance of chromosomes protein 4	SMC4	sp|Q9NTJ3-2|SMC4_HUMAN Isoform 2 of Structural maintenance of chromosomes protein 4 OS=Homo sapiens OX=9606 GN=SMC4;sp|Q9NTJ3|SMC4_HUMAN Structural maintenance of chromosomes protein 4 OS=Homo sapiens OX=9606 GN=SMC4 PE=1 SV=2	1	1	1	1	1	1	3438.4	2800.5	7612.7	4396	5430.8	6540.9	2881.5	4122.8	3537.4	1	1575.2	1	1	1	2903.5	1	1	1	1	1	1	1	1	1
Q9NUP9;O14910	Protein lin-7 homolog C	LIN7C	sp|Q9NUP9|LIN7C_HUMAN Protein lin-7 homolog C OS=Homo sapiens OX=9606 GN=LIN7C PE=1 SV=1	1	1	1	1	1	1	11350	15500	13746	15214	14771	15215	22560	18979	16163	9459	17704	16770	3339.7	8586.4	10018	12708	10029	12332	15550	17993	13466	12441	14358	14211
Q9NV31	U3 small nucleolar ribonucleoprotein protein IMP3	IMP3	sp|Q9NV31|IMP3_HUMAN U3 small nucleolar ribonucleoprotein protein IMP3 OS=Homo sapiens OX=9606 GN=IMP3 PE=1 SV=1	1	1	1	1	1	1	1	1	1	1	1	1	1	1	1	1	1	1	1	1	9906.2	8037.3	1	1	1	1	1	1	1	1
Q9NV70-2;Q9NV70	Exocyst complex component 1	EXOC1	sp|Q9NV70-2|EXOC1_HUMAN Isoform 2 of Exocyst complex component 1 OS=Homo sapiens OX=9606 GN=EXOC1;sp|Q9NV70|EXOC1_HUMAN Exocyst complex component 1 OS=Homo sapiens OX=9606 GN=EXOC1 PE=1 SV=4	1	1	1	1	1	1	1	1	2828.3	1	2329.8	1836.2	1878.9	1714.1	1	1	1	1	1	1	1	1	1	1	1	1	1	1	1	1
Q9NVI1-2;Q9NVI1-1;Q9NVI1;Q9NVI1-4	Fanconi anemia group I protein	FANCI	sp|Q9NVI1-2|FANCI_HUMAN Isoform 2 of Fanconi anemia group I protein OS=Homo sapiens OX=9606 GN=FANCI;sp|Q9NVI1-1|FANCI_HUMAN Isoform 1 of Fanconi anemia group I protein OS=Homo sapiens OX=9606 GN=FANCI;sp|Q9NVI1|FANCI_HUMAN Fanconi anemia group I protein O	1	3343.5	1	1	1	1	11550	14814	22792	16960	17034	15926	15448	11227	3275.2	12626	4260.9	9782.5	1	5535.2	7367.3	6794	5404.3	6253.8	3392.3	5380.6	1	1	2591.4	1
Q9NVI7-2;Q9NVI7;Q9NVI7-3;Q5T2N8	ATPase family AAA domain-containing protein 3A	ATAD3A	sp|Q9NVI7-2|ATD3A_HUMAN Isoform 2 of ATPase family AAA domain-containing protein 3A OS=Homo sapiens OX=9606 GN=ATAD3A;sp|Q9NVI7|ATD3A_HUMAN ATPase family AAA domain-containing protein 3A OS=Homo sapiens OX=9606 GN=ATAD3A PE=1 SV=2;sp|Q9NVI7-3|ATD3A_HUMAN I	12471	9673.5	1793.4	4900.4	2193	3491.6	33645	33710	30842	30028	32358	35134	32127	33543	34372	38278	33033	30843	28377	27841	31843	33473	23327	22529	21425	21851	22993	22968	28363	28539
Q9NVN8	Guanine nucleotide-binding protein-like 3-like protein	GNL3L	sp|Q9NVN8|GNL3L_HUMAN Guanine nucleotide-binding protein-like 3-like protein OS=Homo sapiens OX=9606 GN=GNL3L PE=1 SV=1	7775.7	3609.3	5193.8	11889	8247.2	13286	12955	11960	13688	12896	13706	12479	10336	11251	20740	28700	4877.4	10957	27730	20446	17470	16091	8524.5	4153.8	10965	9620.3	17073	17994	10347	8883.2
Q9NVP1	ATP-dependent RNA helicase DDX18	DDX18	sp|Q9NVP1|DDX18_HUMAN ATP-dependent RNA helicase DDX18 OS=Homo sapiens OX=9606 GN=DDX18 PE=1 SV=2	1	1	1	1	1	1	1	2111.8	1	1	1	1	1	1	1056	1536	1	1	1	1	24105	11879	1	1	1	880.28	1	1	1699.1	1617.5
Q9NVS2-3;Q9NVS2;Q9NVS2-2	28S ribosomal protein S18a, mitochondrial	MRPS18A	sp|Q9NVS2-3|RT18A_HUMAN Isoform 3 of 39S ribosomal protein S18a, mitochondrial OS=Homo sapiens OX=9606 GN=MRPS18A;sp|Q9NVS2|RT18A_HUMAN 39S ribosomal protein S18a, mitochondrial OS=Homo sapiens OX=9606 GN=MRPS18A PE=1 SV=1;sp|Q9NVS2-2|RT18A_HUMAN Isoform 2	1	1	1	49241	26918	21499	29904	48173	29131	29883	33808	40323	1	44528	35458	16836	31329	23027	1	27707	16866	18257	1	24145	1	15056	35708	33850	40430	1
Q9NWB6;Q9NWB6-3;Q9NWB6-2	Arginine and glutamate-rich protein 1	ARGLU1	sp|Q9NWB6|ARGL1_HUMAN Arginine and glutamate-rich protein 1 OS=Homo sapiens OX=9606 GN=ARGLU1 PE=1 SV=1;sp|Q9NWB6-3|ARGL1_HUMAN Isoform 3 of Arginine and glutamate-rich protein 1 OS=Homo sapiens OX=9606 GN=ARGLU1;sp|Q9NWB6-2|ARGL1_HUMAN Isoform 2 of Argini	136820	127360	170390	182780	177960	188230	183750	178150	110200	117290	136340	128070	128310	123990	163520	146810	181180	160320	169850	180020	133240	137050	145200	155580	146990	143110	206380	213730	213840	211860
Q9NWQ8	Phosphoprotein associated with glycosphingolipid-enriched microdomains 1	PAG1	sp|Q9NWQ8|PHAG1_HUMAN Phosphoprotein associated with glycosphingolipid-enriched microdomains 1 OS=Homo sapiens OX=9606 GN=PAG1 PE=1 SV=2	1	1	1	1	1	1	1977.7	6791.3	7605.5	3014.4	5157.6	5054.8	15266	9347.8	6062.8	3522.4	6875.9	4451.5	1	1711.2	2263.5	844.48	1	688.91	2142.6	3122.1	1056	2333.7	1211.5	2869.4
Q9NX00	Transmembrane protein 160	TMEM160	sp|Q9NX00|TM160_HUMAN Transmembrane protein 160 OS=Homo sapiens OX=9606 GN=TMEM160 PE=1 SV=1	1	1	1	1	1	1	22691	25112	28761	29072	22134	21151	13777	14363	8862.4	7069.9	12694	13831	1	1	1	1	1	1	1	1	1	1	1	1
Q9NX24	H/ACA ribonucleoprotein complex subunit 2	NHP2	sp|Q9NX24|NHP2_HUMAN H/ACA ribonucleoprotein complex subunit 2 OS=Homo sapiens OX=9606 GN=NHP2 PE=1 SV=1	16160	15559	14982	14812	11593	16481	10352	12694	9535.8	8523.4	6889.7	7576.5	6058.6	8515.9	16891	20923	8674.3	8908.2	27198	17124	15121	13480	11343	8442	10866	11409	20644	12994	12052	10600
Q9NX58	Cell growth-regulating nucleolar protein	LYAR	sp|Q9NX58|LYAR_HUMAN Cell growth-regulating nucleolar protein OS=Homo sapiens OX=9606 GN=LYAR PE=1 SV=2	5453.2	4096.2	1	4232.1	1	1	1	1	1541.9	1	1	1	5100.3	6106.7	10383	4308.1	1819.7	2791.2	1	6033	4234.4	4214.6	6397.3	4779.7	2888.8	2025.7	3658.8	4416.4	3672.4	3827.5
Q9NX63	MICOS complex subunit MIC19	CHCHD3	sp|Q9NX63|MIC19_HUMAN MICOS complex subunit MIC19 OS=Homo sapiens OX=9606 GN=CHCHD3 PE=1 SV=1	1	1	1	1	1	1	3510.9	6993.8	5402.8	5871.6	5153.8	3877	4778.9	4172.8	2696.3	1	1461.3	1	1	1	1	3055.5	1	1850.7	1199	1	1	1	1	1
Q9NX95-3;Q9NX95;O15079;O15079-2;Q9NX95-5;Q9NX95-2;Q9NX95-4	Syntabulin;Syntaphilin	SYBU;SNPH	sp|Q9NX95-3|SYBU_HUMAN Isoform 3 of Syntabulin OS=Homo sapiens OX=9606 GN=SYBU;sp|Q9NX95|SYBU_HUMAN Syntabulin OS=Homo sapiens OX=9606 GN=SYBU PE=1 SV=2;sp|O15079|SNPH_HUMAN Syntaphilin OS=Homo sapiens OX=9606 GN=SNPH PE=1 SV=2;sp|O15079-2|SNPH_HUMAN Isofo	1	1	1	1	1	1	3521.7	1	4450.2	5211.6	3255.8	3241.8	1	4092.3	1	1	1	1	1	1	1	1	1	1	1	1	1	1	1	5199.9
Q9NXE8;Q9NXE8-2	Pre-mRNA-splicing factor CWC25 homolog	CWC25	sp|Q9NXE8|CWC25_HUMAN Pre-mRNA-splicing factor CWC25 homolog OS=Homo sapiens OX=9606 GN=CWC25 PE=1 SV=1	56594	53185	73706	82282	77728	76227	66015	68194	47014	46464	49645	50337	43947	42200	54898	50822	54900	53177	65116	58611	47359	50436	46817	49686	48216	44271	69541	73333	72848	70196
Q9NXS2;Q9NXS2-3	Glutaminyl-peptide cyclotransferase-like protein	QPCTL	sp|Q9NXS2|QPCTL_HUMAN Glutaminyl-peptide cyclotransferase-like protein OS=Homo sapiens OX=9606 GN=QPCTL PE=1 SV=2;sp|Q9NXS2-3|QPCTL_HUMAN Isoform 2 of Glutaminyl-peptide cyclotransferase-like protein OS=Homo sapiens OX=9606 GN=QPCTL	23399	18794	7766.9	17017	8365.2	12281	144240	152980	206960	219910	164930	157340	101900	101800	68661	76570	106250	114780	51354	41084	33460	33893	46735	46430	45541	46000	57410	57885	54152	50241
Q9NY12-2;Q9NY12	H/ACA ribonucleoprotein complex subunit 1	GAR1	sp|Q9NY12-2|GAR1_HUMAN Isoform 2 of H/ACA ribonucleoprotein complex subunit 1 OS=Homo sapiens OX=9606 GN=GAR1;sp|Q9NY12|GAR1_HUMAN H/ACA ribonucleoprotein complex subunit 1 OS=Homo sapiens OX=9606 GN=GAR1 PE=1 SV=1	18011	14696	12717	17960	16064	19176	11068	10100	8177.2	10572	6262.1	5932.6	6635.3	6602.3	10512	14807	11943	10659	18898	14965	13579	12663	15262	16231	13439	12961	17705	16067	15541	14569
Q9NY93-2;Q9NY93	Probable ATP-dependent RNA helicase DDX56	DDX56	sp|Q9NY93-2|DDX56_HUMAN Isoform 2 of Probable ATP-dependent RNA helicase DDX56 OS=Homo sapiens OX=9606 GN=DDX56;sp|Q9NY93|DDX56_HUMAN Probable ATP-dependent RNA helicase DDX56 OS=Homo sapiens OX=9606 GN=DDX56 PE=1 SV=1	40271	43428	46870	58653	50192	58453	50462	50047	37185	34085	32166	32290	35469	37686	43407	50879	33682	32197	57489	58773	51759	53369	41442	40153	40787	41121	50850	54676	46250	41185
Q9NYF8-2;Q9NYF8;Q9NYF8-4;Q9NYF8-3	Bcl-2-associated transcription factor 1	BCLAF1	sp|Q9NYF8-2|BCLF1_HUMAN Isoform 2 of Bcl-2-associated transcription factor 1 OS=Homo sapiens OX=9606 GN=BCLAF1;sp|Q9NYF8|BCLF1_HUMAN Bcl-2-associated transcription factor 1 OS=Homo sapiens OX=9606 GN=BCLAF1 PE=1 SV=2;sp|Q9NYF8-4|BCLF1_HUMAN Isoform 4 of Bc	16776	15911	20661	20716	23353	29923	10401	10068	4541.5	4585.4	6338.4	5672.7	7326.3	7683	11290	11518	10530	7397.9	16148	14826	31295	33862	12621	13159	11310	11527	12183	10376	20763	22326
Q9NZ01;Q9NZ01-2	Very-long-chain enoyl-CoA reductase	TECR	sp|Q9NZ01|TECR_HUMAN Very-long-chain enoyl-CoA reductase OS=Homo sapiens OX=9606 GN=TECR PE=1 SV=1;sp|Q9NZ01-2|TECR_HUMAN Isoform 2 of Very-long-chain enoyl-CoA reductase OS=Homo sapiens OX=9606 GN=TECR	8923.9	7761.7	5413.4	6664.9	5967.3	3518.9	23707	26660	27286	26551	23535	23568	21295	21222	19496	13418	18752	18021	10379	16048	13845	14106	13174	12703	9828.8	10049	12659	12399	13247	11541
Q9NZI8;Q9NZI8-2;O00425-2;Q9Y6M1-5;Q9Y6M1-6;Q9Y6M1-3;Q9Y6M1-4;Q9Y6M1-1;Q9Y6M1	Insulin-like growth factor 2 mRNA-binding protein 1	IGF2BP1	sp|Q9NZI8|IF2B1_HUMAN Insulin-like growth factor 2 mRNA-binding protein 1 OS=Homo sapiens OX=9606 GN=IGF2BP1 PE=1 SV=2;sp|Q9NZI8-2|IF2B1_HUMAN Isoform 2 of Insulin-like growth factor 2 mRNA-binding protein 1 OS=Homo sapiens OX=9606 GN=IGF2BP1	12629	10217	2371.8	3710.6	1	1	13394	12431	10008	8609.4	15330	13887	15931	15833	15074	19303	16578	17941	7609.3	8652.7	46127	42251	13403	11448	18907	19307	6020.5	5178.8	17197	23338
Q9NZN3;Q9NZN3-2;Q9H4M9;Q9H223;Q9NZN4	EH domain-containing protein 3;EH domain-containing protein 1	EHD3;EHD1	sp|Q9NZN3|EHD3_HUMAN EH domain-containing protein 3 OS=Homo sapiens OX=9606 GN=EHD3 PE=1 SV=2;sp|Q9NZN3-2|EHD3_HUMAN Isoform 2 of EH domain-containing protein 3 OS=Homo sapiens OX=9606 GN=EHD3;sp|Q9H4M9|EHD1_HUMAN EH domain-containing protein 1 OS=Homo sap	1	1	1	1	1	1	1	1347.1	14505	9553.4	1402.7	1	4156.8	5219.8	6226.8	6451.7	3169.6	3203.5	1	1	1	1	474.57	1	1	1	1	1	1	1
Q9NZT1	Calmodulin-like protein 5	CALML5	sp|Q9NZT1|CALL5_HUMAN Calmodulin-like protein 5 OS=Homo sapiens OX=9606 GN=CALML5 PE=1 SV=2	1	1	1	1	68351	77777	1	1	1	1	1	1	1	1	1	1	1	1	1	1	1	1	1	1	1	1	1	1	1	1
Q9NZW5	MAGUK p55 subfamily member 6	MPP6	sp|Q9NZW5|MPP6_HUMAN MAGUK p55 subfamily member 6 OS=Homo sapiens OX=9606 GN=MPP6 PE=1 SV=2	1	1	1	1	1	1	4105.6	1	4196.1	1	3376.1	3025	7907.2	6851.6	3881.7	5960.5	4004.5	2878	1	1554.1	2756.3	1	1	1	1	1	1	1	3276.7	2448.6
Q9P021	Cysteine-rich PDZ-binding protein	CRIPT	sp|Q9P021|CRIPT_HUMAN Cysteine-rich PDZ-binding protein OS=Homo sapiens OX=9606 GN=CRIPT PE=1 SV=1	12487	9769	1	1	9223.2	11168	7790.6	10351	6338.6	5927.8	5362.6	6966.2	7121.2	7584.6	12527	19849	8050.8	6330.2	21550	15493	11588	11371	7796.1	5065	9385.8	10760	14565	11659	12904	13589
Q9P0M6	Core histone macro-H2A.2	H2AFY2	sp|Q9P0M6|H2AW_HUMAN Core histone macro-H2A.2 OS=Homo sapiens OX=9606 GN=MACROH2A2 PE=1 SV=3	1	1	1	1	1	1	1	1	1	1	1	1	1	1	1	1	1	1	1	1	7835.8	8082.6	1	1	1	1	1	1	1	1699.6
Q9P258	Protein RCC2	RCC2	sp|Q9P258|RCC2_HUMAN Protein RCC2 OS=Homo sapiens OX=9606 GN=RCC2 PE=1 SV=2	45545	42394	26555	33409	34676	33135	31407	34202	37398	35826	32137	32497	36513	37315	39411	31227	35101	35005	45419	56424	39427	40852	40862	43354	42755	41854	53203	52138	32459	32531
Q9P2J5;Q9P2J5-2;Q9P2J5-3	Leucine--tRNA ligase, cytoplasmic	LARS	sp|Q9P2J5|SYLC_HUMAN Leucine--tRNA ligase, cytoplasmic OS=Homo sapiens OX=9606 GN=LARS1 PE=1 SV=2;sp|Q9P2J5-2|SYLC_HUMAN Isoform 2 of Leucine--tRNA ligase, cytoplasmic OS=Homo sapiens OX=9606 GN=LARS1;sp|Q9P2J5-3|SYLC_HUMAN Isoform 3 of Leucine--tRNA ligas	1	1	1	1	1	1	1	1	4602.4	3490.7	5758.4	5123	6651	6699.4	3819.1	3529.2	2681.7	1	1	1952	3519.8	1	3947.8	5697	5052.7	5257.4	1	1	1803.3	2066.6
Q9UBB4-2;Q9UBB4	Ataxin-10	ATXN10	sp|Q9UBB4-2|ATX10_HUMAN Isoform 2 of Ataxin-10 OS=Homo sapiens OX=9606 GN=ATXN10;sp|Q9UBB4|ATX10_HUMAN Ataxin-10 OS=Homo sapiens OX=9606 GN=ATXN10 PE=1 SV=1	1	1	1	1	1	1	1	1589.7	3907.3	3803.1	3178	4107.5	4340.7	2721.2	1471.9	1	1	1385.9	1	1	1	1	1	829.06	1	1	1	1	1	1
Q9UBB9;Q9UBB9-2	Tuftelin-interacting protein 11	TFIP11	sp|Q9UBB9|TFP11_HUMAN Tuftelin-interacting protein 11 OS=Homo sapiens OX=9606 GN=TFIP11 PE=1 SV=1	1108.2	4109.6	2323.1	1	4537.6	1	8602.2	9483.3	6387.6	5458	5323.8	4206.5	12240	10550	15901	9165.1	7271.4	7288.5	7637.2	12475	8583.2	9438.9	7506.6	8836.3	6615.2	6838.7	7937.8	7703.9	9124.2	11047
Q9UBI6	Guanine nucleotide-binding protein G(I)/G(S)/G(O) subunit gamma-12	GNG12	sp|Q9UBI6|GBG12_HUMAN Guanine nucleotide-binding protein G(I)/G(S)/G(O) subunit gamma-12 OS=Homo sapiens OX=9606 GN=GNG12 PE=1 SV=3	1	1	1	1	1	1	45438	43087	39188	39251	33371	33102	33974	35903	42805	42531	45186	44100	31534	23969	26051	26372	26148	24788	37944	38182	39939	40800	40234	38757
Q9UBN7;Q9UBN7-2	Histone deacetylase 6	HDAC6	sp|Q9UBN7|HDAC6_HUMAN Histone deacetylase 6 OS=Homo sapiens OX=9606 GN=HDAC6 PE=1 SV=2;sp|Q9UBN7-2|HDAC6_HUMAN Isoform 2 of Histone deacetylase 6 OS=Homo sapiens OX=9606 GN=HDAC6	27489	22108	20818	22985	13961	17795	15947	15877	12157	11652	18297	19413	16643	16566	17740	21334	15266	16156	16995	15435	16611	16883	18803	18208	10538	10455	15229	15805	17344	16770
Q9UBX3;Q9UBX3-2	Mitochondrial dicarboxylate carrier	SLC25A10	sp|Q9UBX3|DIC_HUMAN Mitochondrial dicarboxylate carrier OS=Homo sapiens OX=9606 GN=SLC25A10 PE=1 SV=2;sp|Q9UBX3-2|DIC_HUMAN Isoform 2 of Mitochondrial dicarboxylate carrier OS=Homo sapiens OX=9606 GN=SLC25A10	4206.6	1	1	1	1	1	26910	37000	49320	44340	40773	38065	33351	31224	28250	27633	31510	27595	25525	23756	21800	22138	21082	19253	10627	11098	12938	11312	9679.1	14431
Q9UET6-2;Q9UET6	Putative tRNA (cytidine(32)/guanosine(34)-2-O)-methyltransferase	FTSJ1	sp|Q9UET6-2|TRM7_HUMAN Isoform 2 of Putative tRNA (cytidine(32)/guanosine(34)-2-O)-methyltransferase OS=Homo sapiens OX=9606 GN=FTSJ1;sp|Q9UET6|TRM7_HUMAN Putative tRNA (cytidine(32)/guanosine(34)-2-O)-methyltransferase OS=Homo sapiens OX=9606 GN=FTSJ1 P	1	1	1	1	1	1	1	1	5251.1	3189.3	9535.1	6530.5	6562.5	5981.9	2529.8	1	4902.8	1	1	1264.4	2610.7	2408.5	1	1560.7	3942.8	10335	1	940.48	1	1
Q9UEU0	Vesicle transport through interaction with t-SNAREs homolog 1B	VTI1B	sp|Q9UEU0|VTI1B_HUMAN Vesicle transport through interaction with t-SNAREs homolog 1B OS=Homo sapiens OX=9606 GN=VTI1B PE=1 SV=3	1	1	1	1	1	1	1	1	4145.4	4236.9	5164.5	4256.8	3514.5	3346.5	1476.1	1	1	1	1	1	1	1	1	1	1	1	1	1	1	1
Q9UGY1	Nucleolar protein 12	NOL12	sp|Q9UGY1|NOL12_HUMAN Nucleolar protein 12 OS=Homo sapiens OX=9606 GN=NOL12 PE=1 SV=1	4059.2	4437.5	7715.5	8267.7	5839.5	3126.6	7204.7	8288.1	6731.9	6460.4	5443.7	2702.7	8554.1	7950.1	14206	6089.1	6378.4	7874.9	5989.9	14821	13619	16774	10139	13390	11913	11377	11889	13442	8926.9	8858
Q9UH62	Armadillo repeat-containing X-linked protein 3	ARMCX3	sp|Q9UH62|ARMX3_HUMAN Armadillo repeat-containing X-linked protein 3 OS=Homo sapiens OX=9606 GN=ARMCX3 PE=1 SV=1	1	1	1	1	1	1	2569.6	2847	26470	25336	11002	12458	4841.5	7891.7	1037.8	1	1	1	1	1	1	1	1	1	1	1	1	1	1	1
Q9UH99-3;Q9UH99;Q9UH99-2	SUN domain-containing protein 2	SUN2	sp|Q9UH99-3|SUN2_HUMAN Isoform 3 of SUN domain-containing protein 2 OS=Homo sapiens OX=9606 GN=SUN2;sp|Q9UH99|SUN2_HUMAN SUN domain-containing protein 2 OS=Homo sapiens OX=9606 GN=SUN2 PE=1 SV=3;sp|Q9UH99-2|SUN2_HUMAN Isoform 2 of SUN domain-containing pro	5598.6	5875.2	1	9234.8	4698.4	3121.4	5735.8	4396.2	3875.6	3399.5	5042.2	6469.3	5848.6	6492	5958.3	4395.8	5501.2	5991.5	4017.7	9421.4	10092	9777.8	11093	10122	7128.2	6516.2	6523.7	7620.1	6008	9591.3
Q9UHA4;Q9UHA4-2	Ragulator complex protein LAMTOR3	LAMTOR3	sp|Q9UHA4|LTOR3_HUMAN Ragulator complex protein LAMTOR3 OS=Homo sapiens OX=9606 GN=LAMTOR3 PE=1 SV=1;sp|Q9UHA4-2|LTOR3_HUMAN Isoform 2 of Ragulator complex protein LAMTOR3 OS=Homo sapiens OX=9606 GN=LAMTOR3	1	1	1	1	1	1	38244	38108	39683	37067	54412	51967	45328	48953	25119	17882	30348	32245	1	7064.9	6949.6	4478	7550.3	6086.6	13779	14883	13221	13414	6879.7	6459.3
Q9UHI6;Q9UHI6-2	Probable ATP-dependent RNA helicase DDX20	DDX20	sp|Q9UHI6|DDX20_HUMAN Probable ATP-dependent RNA helicase DDX20 OS=Homo sapiens OX=9606 GN=DDX20 PE=1 SV=2	992.66	786.45	1	1	1	1	55733	53760	94130	88267	73965	68027	56772	60458	25011	23419	33729	30281	4639.3	7313.4	5724.1	6389.5	7160.8	7055.7	8856.1	9491	9404.4	11067	7246.3	7698.5
Q9UHV9	Prefoldin subunit 2	PFDN2	sp|Q9UHV9|PFD2_HUMAN Prefoldin subunit 2 OS=Homo sapiens OX=9606 GN=PFDN2 PE=1 SV=1	14131	14222	1	7786.3	6045	7380.2	5749	8182.3	5710.1	5061.1	7677.8	7917.1	7756.1	7119.9	7694.6	9581.4	6949.1	7848.1	6905.5	8593.1	8469.4	8696.4	13473	12418	10452	9865.7	9277.2	7292.9	9958.3	10890
Q9UHX1-2;Q9UHX1;Q9UHX1-4;Q9UHX1-3	Poly(U)-binding-splicing factor PUF60	PUF60	sp|Q9UHX1-2|PUF60_HUMAN Isoform 2 of Poly(U)-binding-splicing factor PUF60 OS=Homo sapiens OX=9606 GN=PUF60;sp|Q9UHX1|PUF60_HUMAN Poly(U)-binding-splicing factor PUF60 OS=Homo sapiens OX=9606 GN=PUF60 PE=1 SV=1;sp|Q9UHX1-4|PUF60_HUMAN Isoform 4 of Poly(U)-	228580	217260	355810	389510	444040	415370	327150	328020	195550	192270	233760	225120	223770	220090	357250	390710	242210	246400	380910	342130	232220	239130	201570	202600	197760	193150	333220	357820	286670	292630
Q9UHX1-6;Q9UHX1-5	Poly(U)-binding-splicing factor PUF60	PUF60	sp|Q9UHX1-6|PUF60_HUMAN Isoform 6 of Poly(U)-binding-splicing factor PUF60 OS=Homo sapiens OX=9606 GN=PUF60;sp|Q9UHX1-5|PUF60_HUMAN Isoform 5 of Poly(U)-binding-splicing factor PUF60 OS=Homo sapiens OX=9606 GN=PUF60	25848	70208	130510	124500	128130	132670	96051	98116	69453	71973	79232	81784	84022	88561	127940	173850	104860	106650	163220	138340	92868	84185	100640	89582	95216	98340	140740	163500	117930	112410
Q9UI10;Q9UI10-3;Q9UI10-2	Translation initiation factor eIF-2B subunit delta	EIF2B4	sp|Q9UI10|EI2BD_HUMAN Translation initiation factor eIF-2B subunit delta OS=Homo sapiens OX=9606 GN=EIF2B4 PE=1 SV=2;sp|Q9UI10-3|EI2BD_HUMAN Isoform 3 of Translation initiation factor eIF-2B subunit delta OS=Homo sapiens OX=9606 GN=EIF2B4;sp|Q9UI10-2|EI2BD	1	1	1	1	1	1	35512	34033	72326	71182	38160	39358	21398	18228	3759.2	3532.2	4837.5	3751.6	1	1	1	1	1	1	1	1	1	1	1	1
Q9UI12-2;Q9UI12	V-type proton ATPase subunit H	ATP6V1H	sp|Q9UI12-2|VATH_HUMAN Isoform 2 of V-type proton ATPase subunit H OS=Homo sapiens OX=9606 GN=ATP6V1H;sp|Q9UI12|VATH_HUMAN V-type proton ATPase subunit H OS=Homo sapiens OX=9606 GN=ATP6V1H PE=1 SV=1	1	1	1	1	1	1	5269.2	7247.3	11809	11704	16627	13339	11037	9559.8	5148.3	5405.4	6103.2	4826.1	1	1	1	1	1	1	1	2852.7	1	1	1	1
Q9UIG0-2;Q9UIG0	Tyrosine-protein kinase BAZ1B	BAZ1B	sp|Q9UIG0-2|BAZ1B_HUMAN Isoform 2 of Tyrosine-protein kinase BAZ1B OS=Homo sapiens OX=9606 GN=BAZ1B;sp|Q9UIG0|BAZ1B_HUMAN Tyrosine-protein kinase BAZ1B OS=Homo sapiens OX=9606 GN=BAZ1B PE=1 SV=2	1	1	1	1	1	1	1	1	1	1	1	1	1	1	1	1	1	1	1	1	7696.5	3174.9	1	1	1	1	1	1	1	1126.8
Q9UII2;Q9UII2-3;Q9UII2-2	ATPase inhibitor, mitochondrial	ATPIF1	sp|Q9UII2|ATIF1_HUMAN ATPase inhibitor, mitochondrial OS=Homo sapiens OX=9606 GN=ATP5IF1 PE=1 SV=1;sp|Q9UII2-3|ATIF1_HUMAN Isoform 3 of ATPase inhibitor, mitochondrial OS=Homo sapiens OX=9606 GN=ATP5IF1;sp|Q9UII2-2|ATIF1_HUMAN Isoform 2 of ATPase inhibitor	13180	6967	1	1	1	8724.3	1	12007	1	1	8214	7687.6	9347.9	9130	23116	20992	11221	9747.8	15275	17354	12904	12691	12151	13446	11536	11068	13931	11443	10694	11420
Q9UJS0;Q9UJS0-2	Calcium-binding mitochondrial carrier protein Aralar2	SLC25A13	sp|Q9UJS0|CMC2_HUMAN Calcium-binding mitochondrial carrier protein Aralar2 OS=Homo sapiens OX=9606 GN=SLC25A13 PE=1 SV=2;sp|Q9UJS0-2|CMC2_HUMAN Isoform 2 of Calcium-binding mitochondrial carrier protein Aralar2 OS=Homo sapiens OX=9606 GN=SLC25A13	9930.1	8104.1	1	3941.3	1	1486.9	21443	18843	22852	22240	20176	19457	21298	22669	19050	21336	18045	18938	19224	18018	15878	15874	16545	17585	12263	13283	14103	13054	13491	12320
Q9UJV9	Probable ATP-dependent RNA helicase DDX41	DDX41	sp|Q9UJV9|DDX41_HUMAN Probable ATP-dependent RNA helicase DDX41 OS=Homo sapiens OX=9606 GN=DDX41 PE=1 SV=2	191250	178930	228580	250930	245220	237650	208340	216890	166410	165010	182900	185320	184000	182370	229310	241360	205520	191900	273270	238180	173600	177680	174620	176420	153320	150400	226500	227540	209660	203370
Q9UJZ1-2;Q9UJZ1	Stomatin-like protein 2, mitochondrial	STOML2	sp|Q9UJZ1-2|STML2_HUMAN Isoform 2 of Stomatin-like protein 2, mitochondrial OS=Homo sapiens OX=9606 GN=STOML2;sp|Q9UJZ1|STML2_HUMAN Stomatin-like protein 2, mitochondrial OS=Homo sapiens OX=9606 GN=STOML2 PE=1 SV=1	4756.6	1912.4	1	1	1	1	6703.4	3228.6	28348	22003	32731	26870	24498	23556	11162	11549	7508.3	8465.9	1954.6	2474.8	6410.9	3330.2	10623	10198	7857.7	9085	1	1	1597	7420.8
Q9UKD2	mRNA turnover protein 4 homolog	MRTO4	sp|Q9UKD2|MRT4_HUMAN mRNA turnover protein 4 homolog OS=Homo sapiens OX=9606 GN=MRTO4 PE=1 SV=2	57887	51651	53432	62333	58623	66138	51110	46985	37081	36783	26892	26426	20120	22388	42741	42504	39504	47719	59741	59458	65852	61845	41351	39168	44284	38581	69805	71748	51650	51864
Q9UKF6	Cleavage and polyadenylation specificity factor subunit 3	CPSF3	sp|Q9UKF6|CPSF3_HUMAN Cleavage and polyadenylation specificity factor subunit 3 OS=Homo sapiens OX=9606 GN=CPSF3 PE=1 SV=1	3513.4	3383.4	1	1	1	1	1	1	1	1	1	1	2590.9	2216.1	2374.2	1	1	1	1	1	3135.6	1975	2796.4	2916	1328.4	1	1	1	1567.4	1447.2
Q9UKM9-2;Q9UKM9	RNA-binding protein Raly	RALY	sp|Q9UKM9-2|RALY_HUMAN Isoform 1 of RNA-binding protein Raly OS=Homo sapiens OX=9606 GN=RALY;sp|Q9UKM9|RALY_HUMAN RNA-binding protein Raly OS=Homo sapiens OX=9606 GN=RALY PE=1 SV=1	1	1	1	1	1	1	1	1	1	1	1	1	1	754.52	1	1	1	1	1	1	10587	8883.8	1	1	1	1	1	1	1973.3	1470
Q9UKS6	Protein kinase C and casein kinase substrate in neurons protein 3	PACSIN3	sp|Q9UKS6|PACN3_HUMAN Protein kinase C and casein kinase substrate in neurons protein 3 OS=Homo sapiens OX=9606 GN=PACSIN3 PE=1 SV=2	1	1	1	1	1	1	1	1	2237.6	2514.8	9780.9	11156	3763.6	4133	3669.1	1	1	1	1	1	1	1	1	1	1	1	1	1	1	1
Q9ULX6-2;Q9ULX6	A-kinase anchor protein 8-like	AKAP8L	sp|Q9ULX6-2|AKP8L_HUMAN Isoform 2 of A-kinase anchor protein 8-like OS=Homo sapiens OX=9606 GN=AKAP8L;sp|Q9ULX6|AKP8L_HUMAN A-kinase anchor protein 8-like OS=Homo sapiens OX=9606 GN=AKAP8L PE=1 SV=4	1	1	1	1	1	1	1	1	3838.4	2991.7	1	1	3835.3	4410	3526.5	3101.4	1	1	1	1	1	1	1	1	1	1	1	1	1	1
Q9UMS4	Pre-mRNA-processing factor 19	PRPF19	sp|Q9UMS4|PRP19_HUMAN Pre-mRNA-processing factor 19 OS=Homo sapiens OX=9606 GN=PRPF19 PE=1 SV=1	4822	2272.5	1	1	1	1	1	1	7226.4	1	9880.1	10011	9920.6	14475	8990.6	10605	6146.7	4278.5	5891	1	30252	19932	14068	9987.7	16271	16415	6085.6	7394.8	12590	11641
Q9UNM6;Q9UNM6-2	26S proteasome non-ATPase regulatory subunit 13	PSMD13	sp|Q9UNM6|PSD13_HUMAN 26S proteasome non-ATPase regulatory subunit 13 OS=Homo sapiens OX=9606 GN=PSMD13 PE=1 SV=2;sp|Q9UNM6-2|PSD13_HUMAN Isoform 2 of 26S proteasome non-ATPase regulatory subunit 13 OS=Homo sapiens OX=9606 GN=PSMD13	1	1	1	1	1	1	1	1	1	1	5045.8	2619.2	2706.8	3584.4	1	1	1	1	1	2158.3	4034.2	4586.8	3675.6	4137.7	4623.8	4502.8	1	1	1	1
Q9UNZ5	Leydig cell tumor 10 kDa protein homolog	C19orf53	sp|Q9UNZ5|L10K_HUMAN Leydig cell tumor 10 kDa protein homolog OS=Homo sapiens OX=9606 GN=C19orf53 PE=1 SV=1	13791	12141	18507	16480	18495	15792	12157	15648	8976.9	13326	10768	11502	16105	16680	19101	12035	14132	9550.1	14957	23122	13388	10518	11957	14214	15726	14212	20990	21814	17553	17890
Q9UPQ9;Q9UPQ9-1;Q9UPQ9-2	Trinucleotide repeat-containing gene 6B protein	TNRC6B	sp|Q9UPQ9|TNR6B_HUMAN Trinucleotide repeat-containing gene 6B protein OS=Homo sapiens OX=9606 GN=TNRC6B PE=1 SV=4;sp|Q9UPQ9-1|TNR6B_HUMAN Isoform 2 of Trinucleotide repeat-containing gene 6B protein OS=Homo sapiens OX=9606 GN=TNRC6B;sp|Q9UPQ9-2|TNR6B_HUMAN	12485	7813.7	3051.8	7773.7	6961.7	5891.6	1	2776.2	1	1	3816.2	3390.1	4922.2	4421.8	3248.3	6123.1	3319.3	1	5934.5	5623.9	5362.5	6983.8	4451.9	4712.4	2911.1	3212.2	4088.6	1	6035.2	5674.2
Q9UPT5-4;Q9UPT5-2;Q9UPT5-5;Q9UPT5-1;Q9UPT5-6;Q9UPT5	Exocyst complex component 7	EXOC7	sp|Q9UPT5-4|EXOC7_HUMAN Isoform 4 of Exocyst complex component 7 OS=Homo sapiens OX=9606 GN=EXOC7;sp|Q9UPT5-2|EXOC7_HUMAN Isoform 2 of Exocyst complex component 7 OS=Homo sapiens OX=9606 GN=EXOC7;sp|Q9UPT5-5|EXOC7_HUMAN Isoform 5 of Exocyst complex compone	1	1	1	1	1	1	5154	1	8447.1	7767.9	5477.2	5175.1	5942.4	6105.8	1	1	1	1	1	1	1	1671.3	1	1	1	1	1	1	1	1
Q9UPT8	Zinc finger CCCH domain-containing protein 4	ZC3H4	sp|Q9UPT8|ZC3H4_HUMAN Zinc finger CCCH domain-containing protein 4 OS=Homo sapiens OX=9606 GN=ZC3H4 PE=1 SV=3	5896.5	10983	8694.2	16460	17928	15748	10043	11062	1756.9	2789.3	3448.9	4351.5	8279.3	8118.1	15639	12658	5161.3	4365.6	14414	18462	11499	11676	9462.2	7838	7230.4	5493.3	15080	14531	10894	10776
Q9UPW6;Q9UPW6-2	DNA-binding protein SATB2	SATB2	sp|Q9UPW6|SATB2_HUMAN DNA-binding protein SATB2 OS=Homo sapiens OX=9606 GN=SATB2 PE=1 SV=2;sp|Q9UPW6-2|SATB2_HUMAN Isoform 2 of DNA-binding protein SATB2 OS=Homo sapiens OX=9606 GN=SATB2	1	1	1	1	1	1	239100	220290	925440	717020	521240	485270	377090	362650	179150	1	1	385570	1	1	1	1	1	1	1	1	1	1	1	1
Q9UQ35;Q9UQ35-2;Q9UQ35-3	Serine/arginine repetitive matrix protein 2	SRRM2	sp|Q9UQ35|SRRM2_HUMAN Serine/arginine repetitive matrix protein 2 OS=Homo sapiens OX=9606 GN=SRRM2 PE=1 SV=2	129790	132340	185360	201380	198640	181550	144200	137090	107950	109870	116900	118270	118520	115050	157830	147160	143810	147320	132880	145020	132610	136450	123520	121750	117950	114860	164410	173680	150040	140560
Q9UQ80-2;Q9UQ80	Proliferation-associated protein 2G4	PA2G4	sp|Q9UQ80-2|PA2G4_HUMAN Isoform 2 of Proliferation-associated protein 2G4 OS=Homo sapiens OX=9606 GN=PA2G4;sp|Q9UQ80|PA2G4_HUMAN Proliferation-associated protein 2G4 OS=Homo sapiens OX=9606 GN=PA2G4 PE=1 SV=3	12755	13576	1	1	1	1	7531.1	7844	8122.8	9233.4	9621.7	8144.8	9798.6	8618.4	3562.6	2890.5	4209.8	1	1	1	2753.6	3898.6	7259.6	6895.4	10443	9748.3	1	1	1	1
Q9Y224	UPF0568 protein C14orf166	C14orf166	sp|Q9Y224|RTRAF_HUMAN RNA transcription, translation and transport factor protein OS=Homo sapiens OX=9606 GN=RTRAF PE=1 SV=1	1	1	23146	17751	15425	17925	8141.8	10108	6672.2	6480.4	9819.9	13599	18060	10866	10899	12037	9042.1	8730.8	15193	12561	11064	14121	13214	13398	15039	12642	14062	15461	16171	15126
Q9Y230-2;Q9Y230	RuvB-like 2	RUVBL2	sp|Q9Y230-2|RUVB2_HUMAN Isoform 2 of RuvB-like 2 OS=Homo sapiens OX=9606 GN=RUVBL2;sp|Q9Y230|RUVB2_HUMAN RuvB-like 2 OS=Homo sapiens OX=9606 GN=RUVBL2 PE=1 SV=3	8696.9	9882	1258.3	3934.3	1	1	12672	10991	13192	13086	13894	16622	12517	13870	10047	13914	5579.4	7135.3	8022	8364.8	8538.2	8736.4	7842.8	9379.9	7171.6	8520.2	4853	4726.2	5302.5	5995.6
Q9Y237;Q9Y237-3;Q9Y237-2	Peptidyl-prolyl cis-trans isomerase NIMA-interacting 4	PIN4	sp|Q9Y237|PIN4_HUMAN Peptidyl-prolyl cis-trans isomerase NIMA-interacting 4 OS=Homo sapiens OX=9606 GN=PIN4 PE=1 SV=1;sp|Q9Y237-3|PIN4_HUMAN Isoform 3 of Peptidyl-prolyl cis-trans isomerase NIMA-interacting 4 OS=Homo sapiens OX=9606 GN=PIN4;sp|Q9Y237-2|PIN	4903.5	3200.2	1	3881.4	1	1	1625.7	2208	1	1	1	466.26	1	1	1	1829.7	1	1	1	2928.1	1	1925.6	1623.6	1397.1	2856.5	2633.8	1	1	1	1
Q9Y241	HIG1 domain family member 1A, mitochondrial	HIGD1A	sp|Q9Y241|HIG1A_HUMAN HIG1 domain family member 1A, mitochondrial OS=Homo sapiens OX=9606 GN=HIGD1A PE=1 SV=1	1	1	1	1	1	1	26600	30536	29181	25968	21558	22761	23019	27609	22501	24443	20624	17364	23687	19435	17137	18641	13412	14040	1	1	1	8170.7	1	8308.3
Q9Y262-2;Q9Y262	Eukaryotic translation initiation factor 3 subunit L	EIF3L	sp|Q9Y262-2|EIF3L_HUMAN Isoform 2 of Eukaryotic translation initiation factor 3 subunit L OS=Homo sapiens OX=9606 GN=EIF3L;sp|Q9Y262|EIF3L_HUMAN Eukaryotic translation initiation factor 3 subunit L OS=Homo sapiens OX=9606 GN=EIF3L PE=1 SV=1	20394	21990	4372.2	9791.1	1	3356.9	1891.3	1	3624.3	7605.7	9388.5	12411	17230	15642	10597	12333	8317.6	11662	9368.1	9661.5	13357	12956	15509	12659	13116	14100	6187.7	5906.8	7655.4	8402.2
Q9Y265;Q9Y265-2	RuvB-like 1	RUVBL1	sp|Q9Y265|RUVB1_HUMAN RuvB-like 1 OS=Homo sapiens OX=9606 GN=RUVBL1 PE=1 SV=1;sp|Q9Y265-2|RUVB1_HUMAN Isoform 2 of RuvB-like 1 OS=Homo sapiens OX=9606 GN=RUVBL1	13031	4615.6	1	3856.9	1	1	10204	9804	6954.7	8150.2	7775.6	11018	6016.1	8748.9	5817	7988.7	6812.1	7571.4	8738.3	6950.7	7450.4	7507.6	7361.8	6980	10267	13531	5438.5	5764.6	6381.5	6352
Q9Y266	Nuclear migration protein nudC	NUDC	sp|Q9Y266|NUDC_HUMAN Nuclear migration protein nudC OS=Homo sapiens OX=9606 GN=NUDC PE=1 SV=1	7211.4	7537.7	1	1	1	1	1892.7	2619.4	1103.7	1	2429.6	5473.8	4603.8	5068.6	2674.1	569.04	3186.2	1631.4	750.44	2146	1842.4	3703.1	2935.5	3812.1	6864.9	5314.9	1	1	1	1719.8
Q9Y285-2;Q9Y285	Phenylalanine--tRNA ligase alpha subunit	FARSA	sp|Q9Y285-2|SYFA_HUMAN Isoform 2 of Phenylalanine--tRNA ligase alpha subunit OS=Homo sapiens OX=9606 GN=FARSA;sp|Q9Y285|SYFA_HUMAN Phenylalanine--tRNA ligase alpha subunit OS=Homo sapiens OX=9606 GN=FARSA PE=1 SV=3	1	1	1	1	1	1	6928.4	6280.7	7044.8	8037	6726.9	7377	8272.1	9328.6	8092.8	9472.3	5322.8	7968	6253.7	6006.1	7055.5	5841.7	6605.1	7074.3	4998.2	6084.4	1	1	1	1
Q9Y295	Developmentally-regulated GTP-binding protein 1	DRG1	sp|Q9Y295|DRG1_HUMAN Developmentally-regulated GTP-binding protein 1 OS=Homo sapiens OX=9606 GN=DRG1 PE=1 SV=1	1	1	1	1	1	1	1	1	5451.6	2956.3	3959.2	2715.6	3446.3	1	3763.1	6307.5	1	1	1	2801	2586.4	2837.5	1	1	1	2172.9	1	1882.8	1	1
Q9Y2H1;Q9Y2H1-2	Serine/threonine-protein kinase 38-like	STK38L	sp|Q9Y2H1|ST38L_HUMAN Serine/threonine-protein kinase 38-like OS=Homo sapiens OX=9606 GN=STK38L PE=1 SV=3;sp|Q9Y2H1-2|ST38L_HUMAN Isoform 2 of Serine/threonine-protein kinase 38-like OS=Homo sapiens OX=9606 GN=STK38L	47272	44889	52892	55764	49404	52163	22165	25071	18348	16416	27637	28288	33120	33510	40579	40701	34157	37228	50182	59734	58754	57182	61556	62784	58752	57489	79542	80984	109340	105970
Q9Y2I1-4;Q9Y2I1-3;Q9Y2I1	Nischarin	NISCH	sp|Q9Y2I1-4|NISCH_HUMAN Isoform 4 of Nischarin OS=Homo sapiens OX=9606 GN=NISCH;sp|Q9Y2I1-3|NISCH_HUMAN Isoform 3 of Nischarin OS=Homo sapiens OX=9606 GN=NISCH;sp|Q9Y2I1|NISCH_HUMAN Nischarin OS=Homo sapiens OX=9606 GN=NISCH PE=1 SV=3	1	1	1	1	1	1	1	1	1	2743.7	5129.6	4586.4	5051.2	4740.1	1878.5	1	2443.4	1	1	1	2591.8	2109	1	2398.6	1	3953.4	1	1	1	1
Q9Y2J2-2;Q9Y2J2;Q9Y2J2-4;Q9Y2J2-3	Band 4.1-like protein 3;Band 4.1-like protein 3, N-terminally processed	EPB41L3	sp|Q9Y2J2-2|E41L3_HUMAN Isoform 2 of Band 4.1-like protein 3 OS=Homo sapiens OX=9606 GN=EPB41L3;sp|Q9Y2J2|E41L3_HUMAN Band 4.1-like protein 3 OS=Homo sapiens OX=9606 GN=EPB41L3 PE=1 SV=2;sp|Q9Y2J2-4|E41L3_HUMAN Isoform 4 of Band 4.1-like protein 3 OS=Homo	1	1	1	1	1	1	7780.2	8823.9	8691.1	8076.2	7375.1	7226.5	10463	11078	9127.6	8841.8	11484	9088	4790.5	4384.2	5370.2	6267.7	5260.9	6205.4	7881.2	8017.1	7374.1	7007.3	9854.1	9205.6
[truncated: 31 more rows]

## Sheet: SPECIFIC G12C
Protein IDs	Protein names	Average EV	Average G12C	RATIO G12C/EV	T.TEST
[truncated: 205 more rows]

[truncated: 5 more sheets: SPECIFIC G12C&i, DIF G12C VS G12C&i, SPECIFIC WT, SPECIFIC WT&i, DIF WT VS WT&i]
